# Supplementary material for: An effective and versatile strategy for the synthesis of structurally diverse heteroarylsilanesviaIr(iii)-catalyzed C–H silylation
Source: Royal Society of Chemistry journal article supplement (doi:10.1039/d1sc02344f), 2021-01-01

# Supplementary Information

## **An Effective and Versatile Strategy for the Synthesis of Structurally Diverse Heteroarylsilanes via Ir(III)- Catalyzed C–H Silylation**

Zhi-Bo Yan,<sup>a</sup> Meng Peng,<sup>a</sup> Qi-Long Chen,<sup>a</sup> Ka Lu,<sup>a</sup> Yong-Qiang Tu,<sup>\*a,b</sup> Kun-Long  
Dai,<sup>a</sup> Fu-Min Zhang,<sup>a</sup> Xiao-Ming Zhang<sup>a</sup>

<sup>a</sup>State Key Laboratory of Applied Organic Chemistry & College of Chemistry and  
Chemical Engineering, Lanzhou University, Lanzhou 730000, P.R. China

<sup>b</sup>School of Chemistry and Chemical Engineering, Frontiers Science Center for  
Transformative Molecules, Shanghai Jiao Tong University, Shanghai 200240, P.R.  
China

E-mail: tuyq@lzu.edu.cn

## Table of contents

|                                                                                                                 |    |
|-----------------------------------------------------------------------------------------------------------------|----|
| 1. General information.....                                                                                     | 3  |
| 2. Preparation of substrates .....                                                                              | 4  |
| 3. Ir-catalyzed silylation of $\gamma$ C-H bonds of heteroarenes.....                                           | 8  |
| 4. Ir-catalyzed silylation of $\delta$ C-H bonds of heteroarenes.....                                           | 24 |
| 5. Ir-catalyzed silylation of $\alpha$ , $\beta$ C-H bonds of <i>N</i> , <i>O</i> , <i>S</i> -heteroarenes..... | 33 |
| 6. Mechanism investigations.....                                                                                | 44 |
| 7. DFT calculations.....                                                                                        | 51 |
| 8. X-ray structural characterization of 2x, 6f, 1bB and 3dB.....                                                | 72 |
| 9. References.....                                                                                              | 97 |
| 10. Copies of NMR spectroscopy.....                                                                             | 98 |

## 1. General information

All the Ir-catalyzed  $\alpha$ ,  $\beta$ ,  $\gamma$ ,  $\delta$  C-H silylation of heteroarenes reactions were carried out using oven-dried (150 °C) Schlenk tubes or bottles equipped with a magnetic stir bar in a glove box under argon atmosphere ( $\text{H}_2\text{O} < 0.5$  ppm,  $\text{O}_2 < 0.5$  ppm). In addition to commercially available chemicals, extra dry solvents including acetonitrile, 1,4-dioxane, ethanol, *N,N*-dimethylformamide (DMF), *o*-xylene, all solvents were purified by standard operating method. 1,2-Dichloroethane (DCE) was distilled from calcium hydride. Toluene and tetrahydrofuran (THF) were dried over sodium. Besides, *tert*-butylethylene, triethylsilane and *o*-xylene were purchased and degassed by freeze-pump-thaw cycle for 3 times. Analytical TLC was performed on silica gel plates with F254 indicator. Visualization was accomplished with ultraviolet light (254 nm). Products purifications were conducted with column chromatography on 200-300 mesh silica gel unless specially stated.

$^1\text{H}$ ,  $^{13}\text{C}$  and  $^{19}\text{F}$  NMR spectra were recorded on Bruker AM-400 MHz or Varian Mercury-600 MHz. Chemical shifts ( $\delta$ ) were reported in ppm relative to residual solvent peak or tetramethylsilane as internal standard ( $\text{CDCl}_3$ :  $\delta_{\text{H}}$  7.26 ppm and  $\delta_{\text{C}}$  77.00 ppm,  $\text{C}_6\text{D}_6$ :  $\delta_{\text{H}}$  7.16 ppm and  $\delta_{\text{C}}$  128.00 ppm). Infrared (IR) spectra were performed on Nicolet FT-170SX spectrometer. High-resolution mass spectral analysis (HRMS) data were collected on the Bruker ApexII with ESI resource. X-ray diffraction data were obtained on Agilent SuperNova Eos diffractometer. Gas Chromatography-Mass Spectrometry (GC-MS) data were collected with Shimadzu GC-MS QP2010SE by means of EI (70 eV) technique.

## 2. Preparation of substrates

Substrates **1a-1k**, **1o**, **1q-1w**, **3a**, **3h**, **3l-3o**, **5a-5j** and **5m-5r** were commercially available, others were prepared according to the following procedures.

### 2.1. General procedure for the synthesis of 2-arylpyridine derivatives **1l**, **1m**, **1n**, **1p**

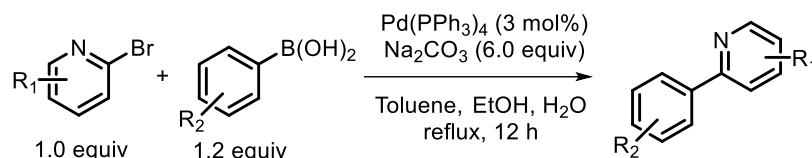

According to the literatures,<sup>1-7</sup> to a 100 mL round-bottom flask was added Pd(PPh<sub>3</sub>)<sub>4</sub> (79.7 mg, 3 mol%), Na<sub>2</sub>CO<sub>3</sub> (1.46 g, 13.8 mmol, 6.0 equiv), and arylboronic acid (2.8 mmol, 1.2 equiv), after that, the solvent of toluene (8 mL), ethanol (1.5 mL), degassed H<sub>2</sub>O (8 mL) combined with substituted 2-bromopyridine (2.3 mmol, 1.0 equiv) were added dropwise under argon atmosphere. The reaction was refluxed for 12 h. After the reaction was completed, the resulting mixture was cooled to room temperature. Aqueous NH<sub>4</sub>Cl was added, the system was extracted with ethyl acetate, dried over anhydrous Na<sub>2</sub>SO<sub>4</sub>, and concentrated *in vacuo*. The residual was purified by silica gel column chromatography to give products **1l**, **1m**, **1n** and **1p**.

2-phenylquinoline (**1l**) <sup>1</sup>H NMR (400 MHz, CDCl<sub>3</sub>) δ 8.22 (d, *J* = 8.4 Hz, 1H), 8.19 – 8.16 (m, 3H), 7.87 (d, *J* = 8.5 Hz, 1H), 7.82 (d, *J* = 7.8 Hz, 1H), 7.77 – 7.50 (m, 4H), 7.46 (t, *J* = 7.2 Hz, 1H).

2-(naphthalen-2-yl)pyridine (**1m**) <sup>1</sup>H NMR (400 MHz, CDCl<sub>3</sub>) δ 8.74 (d, *J* = 4.1 Hz, 1H), 8.48 (s, 1H), 8.13 (dd, *J* = 8.6, 1.5 Hz, 1H), 7.94 (d, *J* = 8.0 Hz, 2H), 7.86 (d, *J* = 8.0 Hz, 2H), 7.77 (td, *J* = 7.9, 1.7 Hz, 1H), 7.54 – 7.45 (m, 2H), 7.24 (dd, *J* = 9.3, 2.9 Hz, 1H).

2-(naphthalen-1-yl)pyridine (**1n**) <sup>1</sup>H NMR (400 MHz, CDCl<sub>3</sub>) δ 8.82 – 8.75 (m, 1H), 8.12 – 8.04 (m, 1H), 7.90 (d, *J* = 8.2 Hz, 2H), 7.80 (td, *J* = 7.7, 1.7 Hz, 1H), 7.62 – 7.42 (m, 5H), 7.34 – 7.28 (m, 1H).

1-(naphthalen-1-yl)isoquinoline (**1p**) <sup>1</sup>H NMR (400 MHz, CDCl<sub>3</sub>) δ 8.72 (d, *J* = 5.8 Hz, 1H), 8.02 (d, *J* = 7.8 Hz, 1H), 8.00 – 7.90 (m, 2H), 7.78 (d, *J* = 5.8 Hz, 1H), 7.74 – 7.68 (m, 1H), 7.66 – 7.55 (m, 3H), 7.52–7.28 (m, 4H).

## 2.2. General procedure for the synthesis of 2-benzylpyridine derivatives **3b-3g** and **3i-3k**

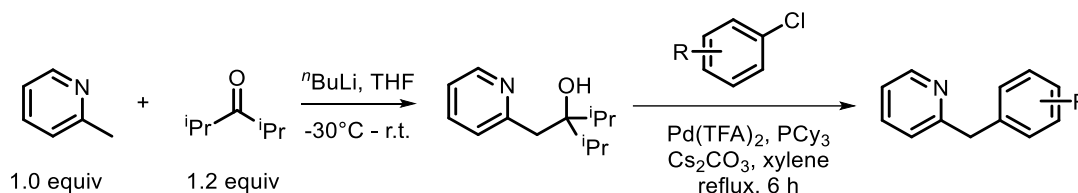

According to the literature,<sup>8</sup> to a solution of 2-methylpyridine (3.72 g, 40 mmol, 1.0 equiv) in tetrahydrofuran (40 mL) was added *n*BuLi (1.6 M in hexane, 27.5 mL, 44 mmol, 1.1 equiv) dropwise at -30 °C. After stirring for 0.5 h, diisopropyl ketone (5.48 g, 48 mmol, 1.2 equiv) was added. The system was reacted for 6 h at room temperature. After the reaction was completed, water was added and the mixture was extracted with ethyl acetate, dried over anhydrous Na<sub>2</sub>SO<sub>4</sub>, and concentrated *in vacuo*. The residual was purified by silica gel column chromatography to afford product 2,4-dimethyl-3-(pyridin-2-ylmethyl)pentan-3-ol.

To dry xylene (1.6 mL) were added Cs<sub>2</sub>CO<sub>3</sub> (0.32 g, 0.97 mmol, 1.2 equiv), Pd(TFA)<sub>2</sub> (12.2 mg, 5 mol%), PCy<sub>3</sub> (0.5 M in toluene, 0.16 mL, 10 mol%), pyridyl alcohol (168 mg, 0.81 mmol, 1.0 equiv) and substituted chlorobenzene (0.97 mmol, 1.2 equiv) at room temperature. The reaction mixture was refluxed for 6 h. After the reaction was completed, the reaction was cooled to room temperature, water was added. The system was extracted with ethyl acetate, dried over anhydrous Na<sub>2</sub>SO<sub>4</sub>, and concentrated *in vacuo*. The residual was purified by silica gel column chromatography to give the products **3b-3g** and **3i-3k**.

2-(4-methylbenzyl)pyridine (**3b**) <sup>1</sup>H NMR (400 MHz, CDCl<sub>3</sub>) δ 8.53 (dd, *J* = 4.6, 1.2 Hz, 1H), 7.54 (td, *J* = 7.7, 1.8 Hz, 1H), 7.19 – 7.12 (m, 2H), 7.08 (dd, *J* = 13.8, 6.6 Hz, 4H), 4.11 (s, 2H), 2.30 (s, 3H).

2-(4-(tert-butyl)benzyl)pyridine (**3c**)  $^1\text{H NMR}$  (400 MHz,  $\text{CDCl}_3$ )  $\delta$  8.54 (d,  $J = 3.9$  Hz, 1H), 7.60 – 7.50 (m, 1H), 7.32 (d,  $J = 8.2$  Hz, 2H), 7.20 (d,  $J = 8.2$  Hz, 2H), 7.15 – 7.03 (m, 2H), 4.12 (s, 2H), 1.29 (s, 9H).

*N,N*-dimethyl-4-(pyridin-2-ylmethyl)aniline (**3d**)  $^1\text{H NMR}$  (400 MHz,  $\text{CDCl}_3$ )  $\delta$  8.52 (d,  $J = 4.0$  Hz, 1H), 7.53 (td,  $J = 7.7, 1.6$  Hz, 1H), 7.14 (d,  $J = 8.6$  Hz, 2H), 7.11 – 7.03 (m, 2H), 6.69 (d,  $J = 8.6$  Hz, 2H), 4.06 (s, 2H), 2.90 (s, 6H).

2-(4-methoxybenzyl)pyridine (**3e**)  $^1\text{H NMR}$  (400 MHz,  $\text{CDCl}_3$ )  $\delta$  8.57 – 8.49 (m, 1H), 7.55 (td,  $J = 7.7, 1.8$  Hz, 1H), 7.22 – 7.14 (m, 2H), 7.13 – 7.05 (m, 2H), 6.88 – 6.79 (m, 2H), 4.09 (s, 2H), 3.77 (s, 3H).

2-(3-methoxybenzyl)pyridine (**3f**)  $^1\text{H NMR}$  (400 MHz,  $\text{CDCl}_3$ )  $\delta$  8.54 (d,  $J = 4.4$  Hz, 1H), 7.56 (td,  $J = 7.7, 1.6$  Hz, 1H), 7.21 (t,  $J = 7.9$  Hz, 1H), 7.15 – 7.05 (m, 2H), 6.85 (d,  $J = 7.5$  Hz, 1H), 6.81 (s, 1H), 6.79 – 6.72 (m, 1H), 4.13 (s, 2H), 3.77 (s, 3H).

2-(2-methoxybenzyl)pyridine (**3g**)  $^1\text{H NMR}$  (300 MHz,  $\text{CDCl}_3$ )  $\delta$  8.52 (d,  $J = 4.7$  Hz, 1H), 7.52 (t,  $J = 7.7$  Hz, 1H), 7.26 – 7.13 (m, 2H), 7.11 – 7.03 (m, 2H), 6.95 – 6.83 (m, 2H), 4.17 (s, 2H), 3.79 (s, 3H).

2-(4-(trifluoromethyl)benzyl)pyridine (**3i**)  $^1\text{H NMR}$  (400 MHz,  $\text{CDCl}_3$ )  $\delta$  8.56 (d,  $J = 4.4$  Hz, 1H), 7.60 (td,  $J = 7.7, 1.8$  Hz, 1H), 7.55 (d,  $J = 8.1$  Hz, 2H), 7.38 (d,  $J = 8.0$  Hz, 2H), 7.17 – 7.07 (m, 2H), 4.20 (s, 2H).

2-(3-(trifluoromethyl)benzyl)pyridine (**3j**)  $^1\text{H NMR}$  (400 MHz,  $\text{CDCl}_3$ )  $\delta$  8.56 (d,  $J = 4.2$  Hz, 1H), 7.60 (td,  $J = 7.7, 1.6$  Hz, 1H), 7.53 (s, 1H), 7.52 – 7.36 (m, 3H), 7.18 – 7.09 (m, 2H), 4.20 (s, 2H).

2-(4-fluorobenzyl)pyridine (**3k**)  $^1\text{H NMR}$  (400 MHz,  $\text{CDCl}_3$ )  $\delta$  8.55 (dd,  $J = 4.8, 0.7$  Hz, 1H), 7.58 (td,  $J = 7.7, 1.8$  Hz, 1H), 7.25 – 7.18 (m, 2H), 7.15 – 7.07 (m, 2H), 7.01 – 6.92 (m, 2H), 4.12 (s, 2H).

### 2.3. General procedure for the synthesis of 2-benzylthiophene **5k** and 2-benzylfuran **5l**

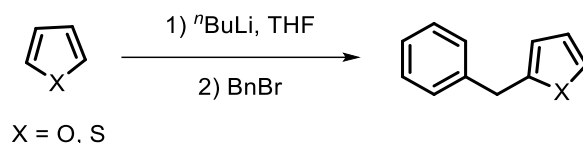

According to the literatures,<sup>9,10</sup> to a solution of thiophene ( $X = \text{S}$ , 1.97 g, 23.4 mmol, 2.0 equiv) or furan ( $X = \text{O}$ , 1.59 g, 23.4 mmol, 2.0 equiv) in THF (20 mL),  $n\text{BuLi}$  (1.6 M in hexane, 11 mL, 17.5 mmol, 1.5 equiv) was added dropwise under argon atmosphere at 0 °C, and stirred for 1 h. A solution of benzyl bromide (1.39 mL, 11.7 mmol, 1.0 equiv) in dry THF (10 mL) was added. After the reaction was completed, water was added and the resulting mixture was extracted with ethyl acetate, dried over anhydrous  $\text{Na}_2\text{SO}_4$ , and concentrated *in vacuo*. The residual was purified by silica gel column chromatography to give the products **5k** and **5l**.

2-benzylthiophene (**5k**)  $^1\text{H NMR}$  (400 MHz,  $\text{CDCl}_3$ )  $\delta$  7.32 – 7.26 (m, 2H), 7.26 – 7.18 (m, 3H), 7.12 (dd,  $J = 4.9, 0.8$  Hz, 1H), 6.91 (t,  $J = 5.0, 3.5$  Hz, 1H), 6.82 – 6.75 (m, 1H), 4.14 (s, 2H).

2-benzylfuran (**5l**)  $^1\text{H NMR}$  (400 MHz,  $\text{CDCl}_3$ )  $\delta$  7.36 – 7.22 (m, 6H), 6.38 – 6.29 (m, 1H), 6.09 – 6.02 (m, 1H), 4.01 (s, 2H).

### 3. Ir-catalyzed silylation of $\gamma$ C-H bonds of heteroarenes

#### 3.1 Optimization conditions of $\gamma$ C-H bonds of heteroarene **1a**

Table S1: Reaction Optimization<sup>a</sup>

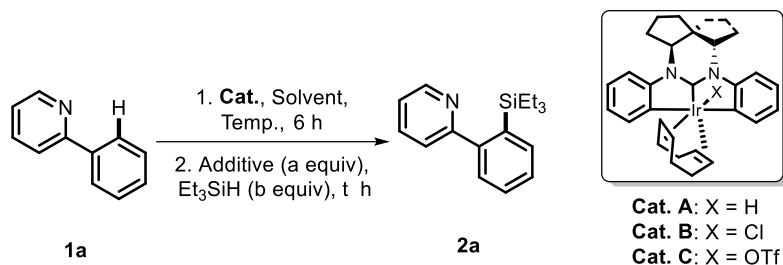

| Entry           | Cat. (mol %) | Additive    | Solvent          | Temp. (°C) | a (equiv) | b (equiv) | t (h) | Yield (%) <sup>b</sup> |
|-----------------|--------------|-------------|------------------|------------|-----------|-----------|-------|------------------------|
| 1               | A (2.5)      | cyclohexene | toluene          | 120        | 5         | 5         | 24    | 32                     |
| 2               | B (2.5)      | cyclohexene | toluene          | 120        | 5         | 5         | 24    | 51                     |
| 3               | C (2.5)      | cyclohexene | toluene          | 120        | 5         | 5         | 36    | trace                  |
| 4               | none         | cyclohexene | toluene          | 150        | 5         | 5         | 24    | 0                      |
| 5               | B (2.5)      | none        | toluene          | 150        | 5         | 5         | 24    | 0                      |
| 6               | A (2.5)      | cyclohexene | toluene          | 120        | 3         | 5         | 24    | 35                     |
| 7               | B (2.5)      | cyclohexene | toluene          | 120        | 3         | 5         | 24    | 47                     |
| 8               | B (2.5)      | cyclohexene | toluene          | 120        | 3         | 3         | 18    | 45                     |
| 9               | B (2.5)      | cyclohexene | toluene          | 120        | 3         | 1         | 24    | 31                     |
| 10              | B (2.5)      | cyclohexene | toluene          | 100        | 3         | 2         | 18    | 46                     |
| 11              | A (2.5)      | cyclohexene | toluene          | 100        | 3         | 2         | 18    | 22                     |
| 12              | C (2.5)      | cyclohexene | toluene          | 100        | 3         | 2         | 18    | <5                     |
| 13              | B (2.5)      | nbe         | toluene          | 100        | 3         | 2         | 18    | 26                     |
| 14              | B (2.5)      | tbe         | toluene          | 100        | 3         | 2         | 18    | 60                     |
| 15              | B (5.0)      | tbe         | toluene          | 100        | 3         | 2         | 18    | 78                     |
| 16              | B (5.0)      | tbe         | DCE              | 100        | 3         | 2         | 18    | trace                  |
| 17              | B (5.0)      | tbe         | dioxane          | 100        | 3         | 2         | 18    | 44                     |
| 18              | B (5.0)      | tbe         | chlorobenzene    | 100        | 3         | 2         | 18    | 75(73) <sup>c</sup>    |
| 19              | B (5.0)      | tbe         | <i>o</i> -xylene | 100        | 3         | 2         | 18    | 85(80) <sup>c</sup>    |
| 20              | B (5.0)      | tbe         | <i>o</i> -xylene | 80         | 3         | 2         | 18    | 63                     |
| 21 <sup>d</sup> | B (5.0)      | tbe         | <i>o</i> -xylene | 100        | 3         | 2         | 18    | 66                     |

<sup>a</sup>Unless otherwise specified, reactions were conducted by pretreatment of a solution of **1a** (0.5 mmol), **Cat.** (2.5-5 mol%) and solvent (2 mL) at given temperature for 6 h, then additive (a equiv) and Et<sub>3</sub>SiH (b equiv) were added and reacted for t h. <sup>b</sup>Determined by GC-MS (internal standard: dodecane). <sup>c</sup>Isolated yield in parentheses. <sup>d</sup>Without pretreatment. nbe = 2-norbornene, tbe = *tert*-butylethylene.



### 3.2 Substrates scope of $\gamma$ C-H bonds of heteroarenes

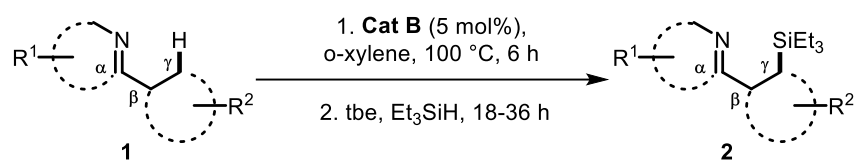

#### General procedure for $\gamma$ C-H bonds of heteroarenes:

In glove box, to dry *o*-xylene were added substrate **1** (0.5 mmol) and **Cat. B** (5 mol%) in a 10 mL oven-dried Schlenk tube. The tube was taken out from the glove box, placed in a preheated oil bath and reacted for 6 h under stirring. After that, the mixture was cooled to room temperature, then the and silane source were added under argon atmosphere. The reaction system was stirred in oil bath for further reaction. After the reaction was completed, the resulting solution was concentrated *in vacuo*, and the residual was purified by silica gel column chromatography to give the silylation product **2**.

#### 2-(2-(triethylsilyl)phenyl)pyridine (**2a**)

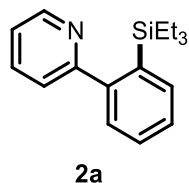

The reaction was conducted according to the general procedure by using **1a** (77.6 mg, 0.5 mmol, 1.0 equiv), catalyst **B** (16.3 mg, 5 mol%), tbe (193.3  $\mu$ L, 1.5 mmol, 3.0 equiv), Et<sub>3</sub>SiH (159.7  $\mu$ L, 1.0 mmol, 2.0 equiv) and *o*-xylene (2 mL) at 100 °C for 18 h to give the silylation product **2a** (107.7 mg, 80% yield).

<sup>1</sup>H NMR (400 MHz, CDCl<sub>3</sub>)  $\delta$  8.67 – 8.59 (m, 1H), 7.70 (m, 1H), 7.67 – 7.62 (m, 1H), 7.47 – 7.33 (m, 4H), 7.27 – 7.21 (m, 1H), 0.83 (t,  $J$  = 7.9 Hz, 9H), 0.55 (q,  $J$  = 7.8 Hz, 6H);

<sup>13</sup>C NMR (100 MHz, CDCl<sub>3</sub>)  $\delta$  161.8, 148.4, 147.8, 136.3, 136.0, 135.9, 129.0, 128.5, 127.1, 123.2, 121.9, 7.6, 4.5;

HRMS (ESI) calcd for [M+Na]<sup>+</sup> C<sub>17</sub>H<sub>23</sub>NSiNa,  $m/z$ : 292.1492, found: 292.1485, Error 2.3 ppm;

IR (KBr): 3078, 2872, 1610, 1004, 798, 753, 724 cm<sup>-1</sup>.

#### 2-(2-methyl-6-(triethylsilyl)phenyl)pyridine (**2b**)

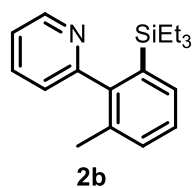

The reaction was conducted according to the general procedure by using **1b** (84.6 mg, 0.5 mmol, 1.0 equiv), catalyst **B** (16.3 mg, 5 mol%), tbe (193.3  $\mu$ L, 1.5 mmol, 3.0 equiv), Et<sub>3</sub>SiH (159.7  $\mu$ L, 1.0 mmol, 2.0 equiv) and *o*-xylene (2 mL) at 100 °C for 18 h to give the silylation product **2b** (117.5 mg, 83% yield).

<sup>1</sup>H NMR (400 MHz, CDCl<sub>3</sub>)  $\delta$  8.67 (d, *J* = 4.2 Hz, 1H), 7.70 (m, 1H), 7.43 (d, *J* = 6.7 Hz, 1H), 7.26 (t, *J* = 8.1 Hz, 4H), 2.02 (s, 3H), 0.80 (t, *J* = 7.9 Hz, 9H), 0.36 (q, *J* = 7.9 Hz, 6H);

<sup>13</sup>C NMR (100 MHz, CDCl<sub>3</sub>)  $\delta$  161.2, 148.9, 147.0, 135.6, 135.2, 133.1, 130.7, 127.1, 124.8, 122.0, 20.4, 7.5, 3.7;

HRMS (ESI) calcd for [M+H]<sup>+</sup> C<sub>18</sub>H<sub>26</sub>NSi, *m/z*: 284.1829, found: 284.1830, Error -0.5 ppm;

IR (KBr): 3055, 2873, 1377, 1004, 859, 791, 728 cm<sup>-1</sup>.

#### 2-(5-methyl-2-(triethylsilyl)phenyl)pyridine (**2c**)

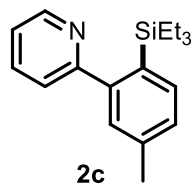

The reaction was conducted according to the general procedure by using **1c** (84.6 mg, 0.5 mmol, 1.0 equiv), catalyst **B** (16.3 mg, 5 mol%), tbe (193.3  $\mu$ L, 1.5 mmol, 3.0 equiv), Et<sub>3</sub>SiH (159.7  $\mu$ L, 1.0 mmol, 2.0 equiv) and *o*-xylene (2 mL) at 100 °C for 18 h to give the silylation product **2c** (72.2 mg, 51% yield).

<sup>1</sup>H NMR (400 MHz, CDCl<sub>3</sub>)  $\delta$  8.64 – 8.60 (m, 1H), 7.73 – 7.67 (m, 1H), 7.53 (d, *J* = 7.6 Hz, 1H), 7.42 (d, *J* = 7.8 Hz, 1H), 7.26 – 7.17 (m, 3H), 2.38 (s, 3H), 0.82 (t, *J* = 9.4 Hz, 9H), 0.53 (q, *J* = 7.8 Hz, 6H);

<sup>13</sup>C NMR (100 MHz, CDCl<sub>3</sub>)  $\delta$  161.9, 148.5, 147.9, 138.3, 136.4, 135.9, 132.1, 130.0, 127.9, 123.2, 121.8, 21.2, 7.6, 4.5;

HRMS (ESI) calcd for [M+H]<sup>+</sup> C<sub>18</sub>H<sub>26</sub>NSi, *m/z*: 284.1829, found: 284.1830, Error -0.3 ppm;

IR (KBr): 3051, 2952, 2872, 1424, 724, 790 cm<sup>-1</sup>.

2-(4-methyl-2-(triethylsilyl)phenyl)pyridine (**2d**)

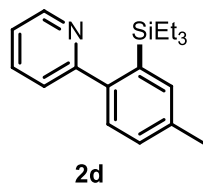

The reaction was conducted according to the general procedure by using **1d** (84.6 mg, 0.5 mmol, 1.0 equiv), catalyst **B** (16.3 mg, 5 mol%), tbe (193.3  $\mu$ L, 1.5 mmol, 3.0 equiv), Et<sub>3</sub>SiH (159.7  $\mu$ L, 1.0 mmol, 2.0 equiv) and *o*-xylene (2 mL) at 100 °C for 18 h to give the silylation product **2d** (123.2 mg, 87% yield).

<sup>1</sup>H NMR (400 MHz, CDCl<sub>3</sub>)  $\delta$  8.59 (d,  $J$  = 4.6 Hz, 1H), 7.68 – 7.62 (m, 1H), 7.47 – 7.38 (m, 2H), 7.32 (d,  $J$  = 7.8 Hz, 1H), 7.23 – 7.15 (m, 2H), 2.39 (s, 3H), 0.83 (t,  $J$  = 7.9 Hz, 9H), 0.57 (q,  $J$  = 7.8 Hz, 6H);

<sup>13</sup>C NMR (100 MHz, CDCl<sub>3</sub>)  $\delta$  161.7, 148.3, 145.0, 137.0, 136.4, 135.9, 135.6, 129.2, 128.9, 123.0, 121.6, 21.3, 7.6, 4.5;

HRMS (ESI) calcd for [M+H]<sup>+</sup> C<sub>18</sub>H<sub>26</sub>NSi,  $m/z$ : 284.1829, found: 284.1834, Error -1.6 ppm;

IR (KBr): 3082, 2872, 1377, 828, 786, 732, 705 cm<sup>-1</sup>.

2-(2,4-difluoro-6-(triethylsilyl)phenyl)pyridine (**2e**)

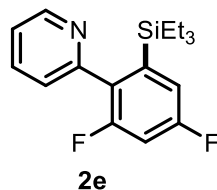

The reaction was conducted according to the general procedure by using **1e** (95.6 mg, 0.5 mmol, 1.0 equiv), catalyst **B** (16.3 mg, 5 mol%), tbe (193.3  $\mu$ L, 1.5 mmol, 3.0 equiv), Et<sub>3</sub>SiH (159.7  $\mu$ L, 1.0 mmol, 2.0 equiv) and *o*-xylene (2 mL) at 100 °C for 18 h to give the silylation product **2e** (111.4 mg, 73% yield).

<sup>1</sup>H NMR (400 MHz, CDCl<sub>3</sub>)  $\delta$  8.67 (d,  $J$  = 4.2 Hz, 1H), 7.84 – 7.59 (m, 1H), 7.40 (d,  $J$  = 7.8 Hz, 1H), 7.34 – 7.28 (m, 1H), 7.16 – 7.08 (m, 1H), 6.93 – 6.82 (m, 1H), 0.81 (t,  $J$  = 7.9 Hz, 9H), 0.46 (q,  $J$  = 7.9 Hz, 6H);

$^{13}\text{C}$  NMR (100 MHz,  $\text{CDCl}_3$ )  $\delta$  163.3, 163.2, 161.3, 161.2, 160.8, 160.7, 158.8, 158.7, 155.0, 149.0, 142.2, 142.2, 135.8, 130.6, 130.5, 125.6, 125.5, 122.7, 118.2, 118.1, 118.0, 118.0, 104.4, 104.1, 103.8, 7.4, 3.8;

$^{19}\text{F}$  NMR (376 MHz,  $\text{CDCl}_3$ )  $\delta$  -111.0, -111.1, -112.2, -112.2;

HRMS (ESI) calcd for  $[\text{M}+\text{H}]^+$   $\text{C}_{17}\text{H}_{22}\text{F}_2\text{NSi}$ ,  $m/z$ : 306.1484, found: 306.1488, Error -1.2 ppm;

IR (KBr): 3085, 2955, 2875, 1684, 1642, 1283, 994, 736  $\text{cm}^{-1}$ .

2-(2-(triethylsilyl)-4-(trifluoromethyl)phenyl)pyridine (**2f**)

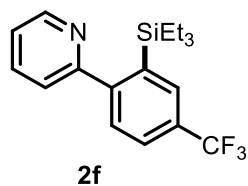

The reaction was conducted according to the general procedure by using **1f** (111.6 mg, 0.5 mmol, 1.0 equiv), catalyst **B** (16.3 mg, 5 mol%), tbe (193.3  $\mu\text{L}$ , 1.5 mmol, 3.0 equiv),  $\text{Et}_3\text{SiH}$  (159.7  $\mu\text{L}$ , 1.0 mmol, 2.0 equiv) and *o*-xylene (2 mL) at 100  $^\circ\text{C}$  for 18 h to give the silylation product **2f** (114.6 mg, 68% yield).

$^1\text{H}$  NMR (400 MHz,  $\text{CDCl}_3$ )  $\delta$  8.66 (m, 1H), 7.87 (d,  $J = 0.5$  Hz, 1H), 7.77 (m, 1H), 7.67 (m, 1H), 7.53 (d,  $J = 8.0$  Hz, 1H), 7.46 (m, 1H), 7.32 (m, 1H), 0.83 (t,  $J = 7.8$  Hz, 9H), 0.57 (q,  $J = 7.8$  Hz, 6H);

$^{13}\text{C}$  NMR (100 MHz,  $\text{CDCl}_3$ )  $\delta$  160.4, 151.1, 148.7, 137.6, 136.4, 132.8, 132.7, 129.2, 129.1, 128.9, 125.8, 125.4, 125.4, 123.1, 122.6, 7.5, 4.2;

$^{19}\text{F}$  NMR (564 MHz,  $\text{CDCl}_3$ )  $\delta$  -62.5;

HRMS (ESI) calcd for  $[\text{M}+\text{Na}]^+$   $\text{C}_{18}\text{H}_{22}\text{F}_3\text{NSiNa}$ ,  $m/z$ : 360.1366, found: 360.1361, Error 1.4 ppm;

IR (KBr): 3051, 2956, 2875, 1587, 1326, 749, 739  $\text{cm}^{-1}$ .

2-(4-methoxy-2-(triethylsilyl)phenyl)pyridine (**2g**)

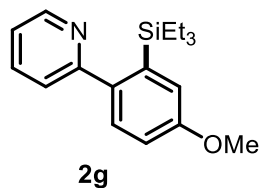

The reaction was conducted according to the general procedure by using **1g** (92.6 mg, 0.5 mmol, 1.0 equiv), catalyst **B** (16.3 mg, 5 mol%), tbe (193.3  $\mu\text{L}$ , 1.5 mmol, 3.0 equiv),  $\text{Et}_3\text{SiH}$  (159.7  $\mu\text{L}$ , 1.0 mmol, 2.0 equiv) and *o*-xylene (2 mL) at 100 °C for 18 h to give the silylation product **2g** (139.1 mg, 93% yield).

**$^1\text{H}$  NMR** (400 MHz,  $\text{CDCl}_3$ )  $\delta$  8.60 (d,  $J = 4.0$  Hz, 1H), 7.72 – 7.64 (m, 1H), 7.45 – 7.37 (m, 2H), 7.24 – 7.18 (m, 2H), 6.96 – 6.90 (m, 1H), 3.85 (s, 3H), 0.83 (t,  $J = 7.8$  Hz, 9H), 0.57 (q,  $J = 7.8$  Hz, 6H);

**$^{13}\text{C}$  NMR** (100 MHz,  $\text{CDCl}_3$ )  $\delta$  161.3, 158.5, 148.3, 140.3, 137.8, 136.0, 130.2, 122.9, 122.7, 121.5, 112.8, 55.1, 7.7, 4.5;

**HRMS (ESI)** calcd for  $[\text{M}+\text{H}]^+$   $\text{C}_{18}\text{H}_{26}\text{NOSi}$ ,  $m/z$ : 300.1778, found: 300.1781, Error -1.0 ppm;

**IR (KBr)**: 3004, 2952, 2872, 1274, 787, 732  $\text{cm}^{-1}$ .

2-methyl-6-(2-(triethylsilyl)phenyl)pyridine (**2h**)

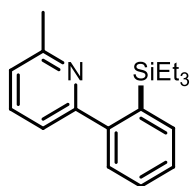

**2h**

The reaction was conducted according to the general procedure by using **1h** (84.6 mg, 0.5 mmol, 1.0 equiv), catalyst **B** (16.3 mg, 5 mol%), tbe (193.3  $\mu\text{L}$ , 1.5 mmol, 3.0 equiv),  $\text{Et}_3\text{SiH}$  (159.7  $\mu\text{L}$ , 1.0 mmol, 2.0 equiv) and *o*-xylene (2 mL) at 100 °C for 18 h to give the silylation product **2h** (121.8 mg, 86% yield).

**$^1\text{H}$  NMR** (600 MHz,  $\text{CDCl}_3$ )  $\delta$  7.63 (d,  $J = 7.2$  Hz, 1H), 7.57 (t,  $J = 7.7$  Hz, 1H), 7.40 – 7.37 (m, 2H), 7.37 – 7.32 (m, 1H), 7.21 (d,  $J = 7.7$  Hz, 1H), 7.09 (d,  $J = 7.7$  Hz, 1H), 2.58 (s, 3H), 0.83 (t,  $J = 7.9$  Hz, 9H), 0.56 (q,  $J = 7.9$  Hz, 6H);

**$^{13}\text{C}$  NMR** (100 MHz,  $\text{CDCl}_3$ )  $\delta$  161.4, 157.1, 148.2, 136.2, 136.2, 135.6, 129.1, 128.4, 126.8, 121.3, 120.2, 24.1, 7.5, 4.3;

**HRMS (ESI)** calcd for  $[\text{M}+\text{H}]^+$   $\text{C}_{18}\text{H}_{26}\text{NSi}$ ,  $m/z$ : 284.1829, found: 284.1825, Error 1.4 ppm;

**IR (KBr)**: 3053, 2952, 2873, 1574, 1445, 803, 723  $\text{cm}^{-1}$ .

5-methyl-2-(2-(triethylsilyl)phenyl)pyridine (**2i**)

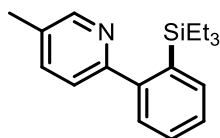

**2i**

The reaction was conducted according to the general procedure by using **1i** (84.6 mg, 0.5 mmol, 1.0 equiv), catalyst **B** (16.3 mg, 5 mol%), tbe (193.3  $\mu$ L, 1.5 mmol, 3.0 equiv), Et<sub>3</sub>SiH (159.7  $\mu$ L, 1.0 mmol, 2.0 equiv) and *o*-xylene (2 mL) at 100 °C for 18 h to give the silylation product **2i** (83.5 mg, 59% yield).

<sup>1</sup>H NMR (400 MHz, CDCl<sub>3</sub>)  $\delta$  8.45 (s, 1H), 7.63 (d, *J* = 7.0 Hz, 1H), 7.51 (d, *J* = 7.5 Hz, 1H), 7.42 – 7.30 (m, 4H), 2.37 (s, 3H), 0.83 (t, *J* = 7.9 Hz, 9H), 0.56 (q, *J* = 7.8 Hz, 6H);

<sup>13</sup>C NMR (100 MHz, CDCl<sub>3</sub>)  $\delta$  159.0, 148.7, 147.8, 136.6, 136.2, 135.7, 131.2, 128.9, 128.4, 126.8, 122.6, 18.2, 7.6, 4.5;

HRMS (ESI) calcd for [M+H]<sup>+</sup> C<sub>18</sub>H<sub>26</sub>NSi, *m/z*: 284.1829, found: 284.1828, Error 0.5 ppm;

IR (KBr): 3079, 2952, 2872, 1490, 1464, 836, 743, 724 cm<sup>-1</sup>.

4-methyl-2-(2-(triethylsilyl)phenyl)pyridine (**2j**)

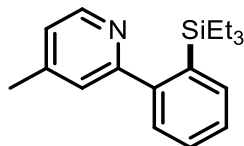

**2j**

The reaction was conducted according to the general procedure by using **1j** (84.6 mg, 0.5 mmol, 1.0 equiv), catalyst **B** (16.3 mg, 5 mol%), tbe (193.3  $\mu$ L, 1.5 mmol, 3.0 equiv), Et<sub>3</sub>SiH (159.7  $\mu$ L, 1.0 mmol, 2.0 equiv) and *o*-xylene (2 mL) at 100 °C for 18 h to give the silylation product **2j** (65.1 mg, 46% yield).

<sup>1</sup>H NMR (400 MHz, CDCl<sub>3</sub>)  $\delta$  8.47 (d, *J* = 5.0 Hz, 1H), 7.63 (d, *J* = 6.7 Hz, 1H), 7.43 – 7.33 (m, 3H), 7.24 (d, *J* = 5.0 Hz, 1H), 7.07 (d, *J* = 4.4 Hz, 1H), 2.38 (s, 3H), 0.83 (t, *J* = 7.9 Hz, 9H), 0.55 (q, *J* = 7.8 Hz, 6H);

<sup>13</sup>C NMR (100 MHz, CDCl<sub>3</sub>)  $\delta$  161.6, 148.2, 148.0, 147.0, 136.2, 135.8, 128.9, 128.4, 126.9, 124.1, 122.9, 21.1, 7.6, 4.4;

HRMS (ESI) calcd for [M+H]<sup>+</sup> C<sub>18</sub>H<sub>26</sub>NSi, *m/z*: 284.1829, found: 284.1825, Error 1.3 ppm;

IR (KBr): 3050, 2952, 2872, 1601, 1003, 890, 742, 724 cm<sup>-1</sup>.

10-(triethylsilyl)benzo[h]quinoline (**2k**)

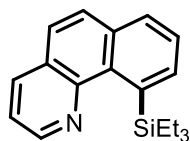

**2k**

The reaction was conducted according to the general procedure by using **1k** (89.6 mg, 0.5 mmol, 1.0 equiv), catalyst **B** (16.3 mg, 5 mol%), tbe (193.3  $\mu$ L, 1.5 mmol, 3.0 equiv), Et<sub>3</sub>SiH (159.7  $\mu$ L, 1.0 mmol, 2.0 equiv) and *o*-xylene (2 mL) at 100 °C for 18 h to give the silylation product **2k** (123.1 mg, 84% yield).

<sup>1</sup>H NMR (400 MHz, CDCl<sub>3</sub>)  $\delta$  8.95 – 8.91 (m, 1H), 8.18 – 8.12 (m, 1H), 8.09 – 8.04 (m, 1H), 7.94 – 7.89 (m, 1H), 7.82 (d, *J* = 8.7 Hz, 1H), 7.71 – 7.64 (m, 2H), 7.51 – 7.46 (m, 1H), 1.10 – 0.98 (m, 6H), 0.91 (t, *J* = 7.7 Hz, 9H);

<sup>13</sup>C NMR (100 MHz, CDCl<sub>3</sub>)  $\delta$  147.1, 145.7, 137.0, 136.9, 135.5, 135.3, 133.8, 129.2, 129.0, 127.2, 126.5, 124.6, 121.4, 8.6, 7.0;

HRMS (ESI) calcd for [M+H]<sup>+</sup> C<sub>19</sub>H<sub>24</sub>NSi, *m/z*: 294.1673, found: 294.1664, Error 3.0 ppm;

IR (KBr): 3044, 2923, 1972, 1403, 834, 749, 618 cm<sup>-1</sup>.

2-(2-(triethylsilyl)phenyl)quinoline (**2l**)

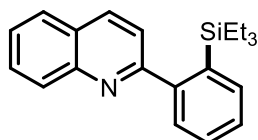

**2l**

The reaction was conducted according to the general procedure by using **1l** (102.6 mg, 0.5 mmol, 1.0 equiv), catalyst **B** (16.3 mg, 5 mol%), tbe (193.3  $\mu$ L, 1.5 mmol, 3.0 equiv), Et<sub>3</sub>SiH (159.7  $\mu$ L, 1.0 mmol, 2.0 equiv) and *o*-xylene (2 mL) at 100 °C for 18 h to give the silylation product **2l** (147.1 mg, 92% yield).

<sup>1</sup>H NMR (600 MHz, CDCl<sub>3</sub>)  $\delta$  8.22 (d, *J* = 8.5 Hz, 2H), 7.89 (d, *J* = 8.1 Hz, 1H), 7.80 – 7.75 (m, 2H), 7.66 (d, *J* = 8.4 Hz, 1H), 7.61 – 7.55 (m, 2H), 7.54 – 7.45 (m, 2H), 0.89 (t, *J* = 7.9 Hz, 9H), 0.68 (q, *J* = 7.9 Hz, 6H);

$^{13}\text{C}$  NMR (150 MHz,  $\text{CDCl}_3$ )  $\delta$  161.6, 148.1, 147.3, 136.5, 136.2, 136.2, 129.6, 129.4, 129.3, 128.5, 127.5, 127.3, 126.8, 126.2, 121.6, 7.6, 4.5;

HRMS (ESI) calcd for  $[\text{M}+\text{H}]^+$   $\text{C}_{21}\text{H}_{26}\text{NSi}$ ,  $m/z$ : 320.1829, found: 320.1830, Error -0.3 ppm;

IR (KBr): 3051, 2952, 2872, 1599, 1423, 792, 734  $\text{cm}^{-1}$ .

2-(3-(triethylsilyl)naphthalen-2-yl)pyridine (**2m**)

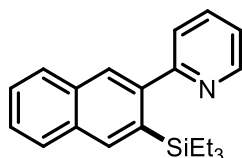

**2m**

The reaction was conducted according to the general procedure by using **1m** (102.6 mg, 0.5 mmol, 1.0 equiv), catalyst **B** (16.3 mg, 5 mol%), tbe (193.3  $\mu\text{L}$ , 1.5 mmol, 3.0 equiv),  $\text{Et}_3\text{SiH}$  (159.7  $\mu\text{L}$ , 1.0 mmol, 2.0 equiv) and *o*-xylene (2 mL) at 100  $^\circ\text{C}$  for 18 h to give the silylation product **2m** (126.1 mg, 79% yield).

$^1\text{H}$  NMR (400 MHz,  $\text{CDCl}_3$ )  $\delta$  8.64 (d,  $J = 4.0$  Hz, 1H), 8.15 (d,  $J = 2.1$  Hz, 1H), 7.88 (s, 2H), 7.85 – 7.79 (m, 1H), 7.74 – 7.65 (m, 1H), 7.54 (d,  $J = 7.8$  Hz, 1H), 7.52 – 7.46 (m, 2H), 7.26 – 7.18 (m, 1H), 0.93 – 0.84 (m, 9H), 0.71 – 0.60 (m, 6H);

$^{13}\text{C}$  NMR (100 MHz,  $\text{CDCl}_3$ )  $\delta$  161.6, 148.4, 144.4, 137.5, 136.2, 133.8, 133.1, 132.3, 127.9, 127.8, 127.7, 126.6, 126.1, 123.1, 121.8, 7.7, 4.6;

HRMS (ESI) calcd for  $[\text{M}+\text{H}]^+$   $\text{C}_{21}\text{H}_{26}\text{NSi}$ ,  $m/z$ : 320.1829, found: 320.1832, Error -0.9 ppm;

IR (KBr): 3045, 2953, 2874, 1664, 1554, 774, 730  $\text{cm}^{-1}$ .

2-(2-(triethylsilyl)naphthalen-1-yl)pyridine (**2n**)

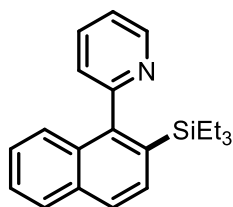

**2n**

The reaction was conducted according to the general procedure by using **1n** (102.6 mg, 0.5 mmol, 1.0 equiv), catalyst **B** (16.3 mg, 5 mol%), tbe (193.3  $\mu\text{L}$ , 1.5 mmol, 3.0 equiv),  $\text{Et}_3\text{SiH}$  (159.7  $\mu\text{L}$ ,



1.0 mmol, 2.0 equiv) and *o*-xylene (2 mL) at 100 °C for 18 h to give the silylation product **2n** (124.5 mg, 78% yield).

**<sup>1</sup>H NMR** (400 MHz, CDCl<sub>3</sub>) δ 8.74 (d, *J* = 4.4 Hz, 1H), 7.84 (t, *J* = 9.5 Hz, 2H), 7.77 – 7.65 (m, 2H), 7.46 – 7.35 (m, 2H), 7.35 – 7.24 (m, 3H), 0.84 (t, *J* = 7.8 Hz, 9H), 0.45 (q, *J* = 7.7 Hz, 6H);

**<sup>13</sup>C NMR** (100 MHz, CDCl<sub>3</sub>) δ 160.3, 149.1, 145.8, 135.4, 133.5, 133.4, 132.1, 131.2, 127.7, 126.8, 126.0, 125.9, 125.8, 122.3, 7.5, 3.7;

**HRMS (ESI)** calcd for [M+H]<sup>+</sup> C<sub>21</sub>H<sub>26</sub>NSi, *m/z*: 320.1829, found: 320.1825, Error 1.3 ppm;

**IR (KBr)**: 3053, 2999, 2872, 1664, 1585, 1003, 744 cm<sup>-1</sup>.

1-(2-(triethylsilyl)phenyl)isoquinoline (**2o**)

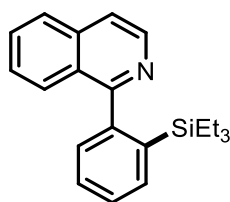

**2o**

The reaction was conducted according to the general procedure by using **1o** (102.6 mg, 0.5 mmol, 1.0 equiv), catalyst **B** (16.3 mg, 5 mol%), tbe (193.3 μL, 1.5 mmol, 3.0 equiv), Et<sub>3</sub>SiH (159.7 μL, 1.0 mmol, 2.0 equiv) and *o*-xylene (2 mL) at 100 °C for 18 h to give the silylation product **2o** (143.6 mg, 90% yield).

**<sup>1</sup>H NMR** (400 MHz, CDCl<sub>3</sub>) δ 8.55 (d, *J* = 5.7 Hz, 1H), 7.83 (d, *J* = 8.2 Hz, 1H), 7.78 – 7.68 (m, 2H), 7.67 – 7.58 (m, 2H), 7.48 – 7.39 (m, 3H), 7.38 – 7.30 (m, 1H), 0.72 (t, *J* = 7.9 Hz, 9H), 0.30 (q, *J* = 7.8 Hz, 6H);

**<sup>13</sup>C NMR** (100 MHz, CDCl<sub>3</sub>) δ 162.9, 145.8, 141.4, 136.8, 136.2, 135.9, 129.8, 129.7, 127.9, 127.8, 127.0, 126.7, 126.6, 120.0, 7.3, 3.6;

**HRMS (ESI)** calcd for [M+Na]<sup>+</sup> C<sub>21</sub>H<sub>25</sub>NSiNa, *m/z*: 342.1648, found: 342.1643, Error 1.5 ppm;

**IR (KBr)**: 3049, 2952, 2873, 1621, 1558, 845, 767 cm<sup>-1</sup>.

1-(2-(triethylsilyl)naphthalen-1-yl)isoquinoline (**2p**)

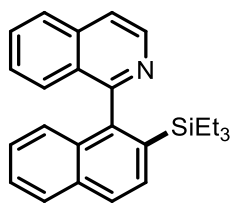

**2p**

The reaction was conducted according to the general procedure by using **1p** (127.7 mg, 0.5 mmol, 1.0 equiv), catalyst **B** (16.3 mg, 5 mol%), tbe (193.3  $\mu$ L, 1.5 mmol, 3.0 equiv), Et<sub>3</sub>SiH (159.7  $\mu$ L, 1.0 mmol, 2.0 equiv) and *o*-xylene (2 mL) at 100 °C for 18 h to give the silylation product **2p** (138.4 mg, 75% yield).

**<sup>1</sup>H NMR** (400 MHz, CDCl<sub>3</sub>)  $\delta$  8.68 (d,  $J$  = 5.7 Hz, 1H), 7.94 (d,  $J$  = 8.3 Hz, 1H), 7.92 – 7.85 (m, 2H), 7.77 (t,  $J$  = 7.0 Hz, 2H), 7.66 – 7.59 (m, 1H), 7.46 – 7.34 (m, 2H), 7.31 (t,  $J$  = 7.6 Hz, 1H), 7.21 – 7.14 (m, 1H), 6.97 (d,  $J$  = 8.5 Hz, 1H), 0.71 (t,  $J$  = 7.9 Hz, 9H), 0.38 – 0.24 (m, 3H), 0.23 – 0.10 (m, 3H);

**<sup>13</sup>C NMR** (100 MHz, CDCl<sub>3</sub>)  $\delta$  161.7, 144.0, 142.1, 135.8, 134.8, 133.4, 132.5, 131.3, 130.1, 129.3, 127.9, 127.7, 127.0, 126.9, 126.7, 126.2, 126.1, 125.9, 120.4, 7.3, 3.3;

**HRMS (ESI)** calcd for [M+H]<sup>+</sup> C<sub>25</sub>H<sub>28</sub>NSi,  $m/z$ : 370.1986, found: 370.1992, Error -1.7 ppm;

**IR (KBr)**: 3050, 2953, 2874, 1620, 1261, 763, 750 cm<sup>-1</sup>.

1-phenyl-2-(2-(triethylsilyl)phenyl)diazene (**2q**)

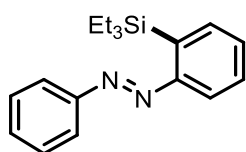

**2q**

The reaction was conducted according to the general procedure by using **1q** (91.1 mg, 0.5 mmol, 1.0 equiv), catalyst **B** (16.3 mg, 5 mol%), tbe (193.3  $\mu$ L, 1.5 mmol, 3.0 equiv), Et<sub>3</sub>SiH (159.7  $\mu$ L, 1.0 mmol, 2.0 equiv) and *o*-xylene (2 mL) at 100 °C for 18 h to give the silylation product **2q** (125.9 mg, 85% yield).

**<sup>1</sup>H NMR** (400 MHz, CDCl<sub>3</sub>)  $\delta$  7.91 (d,  $J$  = 7.3 Hz, 2H), 7.77 – 7.70 (m, 1H), 7.70 – 7.63 (m, 1H), 7.58 – 7.50 (m, 2H), 7.50 – 7.36 (m, 3H), 0.98 – 0.86 (m, 15H);

**<sup>13</sup>C NMR** (100 MHz, CDCl<sub>3</sub>)  $\delta$  157.8, 152.5, 138.9, 135.8, 130.9, 129.9, 129.8, 129.1, 123.2, 114.6, 7.6, 4.6;

**HRMS (ESI)** calcd for  $[M+Na]^+$   $C_{18}H_{24}N_2SiNa$ ,  $m/z$ : 319.1601, found: 319.1590, Error 3.4 ppm;

**IR (KBr)**: 3060, 2953, 2873, 1463, 1261, 764, 749  $cm^{-1}$ .

1-(2-(triethylsilyl)phenyl)-1H-pyrazole (**2r**)

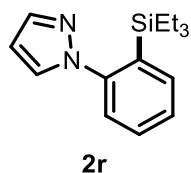

The reaction was conducted according to the general procedure by using **1r** (72.1 mg, 0.5 mmol, 1.0 equiv), catalyst **B** (16.3 mg, 5 mol%), tbe (193.3  $\mu$ L, 1.5 mmol, 3.0 equiv),  $Et_3SiH$  (159.7  $\mu$ L, 1.0 mmol, 2.0 equiv) and *o*-xylene (2 mL) at 100 °C for 18 h to give the silylation product **2r** (92.9 mg, 72% yield).

**$^1H$  NMR** (400 MHz,  $CDCl_3$ )  $\delta$  7.66 (d,  $J = 1.5$  Hz, 1H), 7.63 – 7.58 (m, 2H), 7.45 – 7.36 (m, 2H), 7.28 – 7.23 (m, 1H), 6.42 (t,  $J = 2.1$  Hz, 1H), 0.85 (t,  $J = 7.9$  Hz, 9H), 0.55 (q,  $J = 7.9$  Hz, 6H);

**$^{13}C$  NMR** (100 MHz,  $CDCl_3$ )  $\delta$  146.4, 139.8, 136.7, 133.7, 130.3, 129.5, 127.6, 126.1, 106.5, 7.5, 3.4;

**HRMS (ESI)** calcd for  $[M+Na]^+$   $C_{15}H_{22}N_2SiNa$ ,  $m/z$ : 281.1444, found: 281.1446, Error -0.7 ppm;

**IR (KBr)**: 3063, 2953, 2873, 1591, 743, 727  $cm^{-1}$ .

1-(2,6-bis(triethylsilyl)phenyl)-*N*-phenylmethanimine (**2s**)

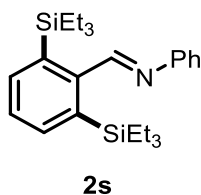

The reaction was conducted according to the general procedure by using **1s** (90.6 mg, 0.5 mmol, 1.0 equiv), catalyst **B** (16.3 mg, 5 mol%), tbe (193.3  $\mu$ L, 1.5 mmol, 3.0 equiv),  $Et_3SiH$  (159.7  $\mu$ L, 1.0 mmol, 2.0 equiv) and *o*-xylene (2 mL) at 100 °C for 24 h to give the silylation product **2s** (98.2 mg, 48% yield).

**$^1H$  NMR** (400 MHz,  $CDCl_3$ )  $\delta$  8.84 (s, 1H), 7.65 (d,  $J = 7.4$  Hz, 2H), 7.46 – 7.34 (m, 3H), 7.28 – 7.22 (m, 1H), 7.22 – 7.15 (m, 2H), 0.95 – 0.81 (m, 30H);

$^{13}\text{C}$  NMR (100 MHz,  $\text{CDCl}_3$ )  $\delta$  161.8, 151.5, 148.6, 137.7, 136.9, 129.3, 128.2, 125.9, 120.8, 7.8, 5.3;

**HRMS (ESI)** calcd for  $[\text{M}+\text{Na}]^+$   $\text{C}_{25}\text{H}_{39}\text{NSi}_2\text{Na}$ ,  $m/z$ : 432.2513, found: 432.2513, Error 0.0 ppm;

**IR (KBr)**: 3047, 2953, 2873, 1628, 1592, 761, 727  $\text{cm}^{-1}$ .

2-(2,6-bis(triethylsilyl)phenyl)-4,5-dihydrooxazole (**2t**)

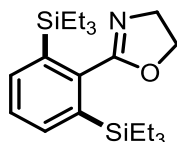

**2t**

The reaction was conducted according to the general procedure by using **1t** (73.6 mg, 0.5 mmol, 1.0 equiv), catalyst **B** (16.3 mg, 5 mol%), tbe (193.3  $\mu\text{L}$ , 1.5 mmol, 3.0 equiv),  $\text{Et}_3\text{SiH}$  (159.7  $\mu\text{L}$ , 1.0 mmol, 2.0 equiv) and *o*-xylene (2 mL) at 100  $^\circ\text{C}$  for 24 h to give the silylation product **2t** (88.2 mg, 47% yield).

$^1\text{H}$  NMR (400 MHz,  $\text{CDCl}_3$ )  $\delta$  7.55 (d,  $J = 7.5$  Hz, 2H), 7.34 (t,  $J = 7.5$  Hz, 1H), 4.36 (t,  $J = 9.9$  Hz, 2H), 4.07 (t,  $J = 9.9$  Hz, 2H), 0.93 (t,  $J = 7.7$  Hz, 18H), 0.80 (q,  $J = 15.1, 7.2$  Hz, 12H);

$^{13}\text{C}$  NMR (100 MHz,  $\text{CDCl}_3$ )  $\delta$  166.8, 141.1, 136.0, 135.9, 127.3, 66.7, 55.3, 7.5, 3.8;

**HRMS (ESI)** calcd for  $[\text{M}+\text{Na}]^+$   $\text{C}_{21}\text{H}_{37}\text{NOSi}_2\text{Na}$ ,  $m/z$ : 398.2306, found: 398.2310, Error -1.0 ppm;

**IR (KBr)**: 3045, 2953, 2874, 1664, 1554, 774, 730  $\text{cm}^{-1}$ .

8-((triethylsilyl)methyl)quinoline (**2u**)

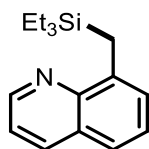

**2u**

The reaction was conducted according to the general procedure by using **1u** (71.6 mg, 0.5 mmol, 1.0 equiv), catalyst **B** (16.3 mg, 5 mol%), tbe (193.3  $\mu\text{L}$ , 1.5 mmol, 3.0 equiv),  $\text{Et}_3\text{SiH}$  (159.7  $\mu\text{L}$ , 1.0 mmol, 2.0 equiv) and *o*-xylene (2 mL) at 100  $^\circ\text{C}$  for 24 h to give the silylation product **2u** (122.2 mg, 95% yield).

**<sup>1</sup>H NMR** (400 MHz, CDCl<sub>3</sub>) δ 8.88 (dd, *J* = 4.1, 1.8 Hz, 1H), 8.09 (dd, *J* = 8.2, 1.8 Hz, 1H), 7.54 (dd, *J* = 7.0, 2.5 Hz, 1H), 7.43 – 7.39 (m, 2H), 7.35 (dd, *J* = 8.2, 4.1 Hz, 1H), 2.85 (s, 2H), 0.87 (t, *J* = 7.9 Hz, 9H), 0.48 (q, *J* = 7.9 Hz, 6H);

**<sup>13</sup>C NMR** (100 MHz, CDCl<sub>3</sub>) δ 148.5, 146.6, 140.8, 136.1, 128.4, 127.8, 126.2, 123.7, 120.7, 16.9, 7.3, 3.5;

**HRMS (ESI)** calcd for [M+H]<sup>+</sup> C<sub>16</sub>H<sub>24</sub>NSi, *m/z*: 258.1673, found: 258.1671, Error 0.5 ppm;

**IR (KBr)**: 3044, 2952, 2730, 1605, 1008, 798, 724 cm<sup>-1</sup>.

2-ethyl-6-(2-(triethylsilyl)ethyl)pyridine (**2v**)

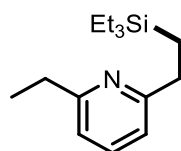

**2v**

The reaction was conducted according to the general procedure by using **1v** (67.6 mg, 0.5 mmol, 1.0 equiv), catalyst **B** (16.3 mg, 5 mol%), tbe (193.3 μL, 1.5 mmol, 3.0 equiv), Et<sub>3</sub>SiH (159.7 μL, 1.0 mmol, 2.0 equiv) and *o*-xylene (2 mL) at 140 °C for 36 h to give the silylation product **2v** (56.1 mg, 45% yield).

**<sup>1</sup>H NMR** (400 MHz, CDCl<sub>3</sub>) δ 7.51 (t, *J* = 7.7 Hz, 1H), 7.00 (d, *J* = 7.7 Hz, 1H), 6.95 (d, *J* = 7.6 Hz, 1H), 2.85 – 2.73 (m, 4H), 1.29 (t, *J* = 7.6 Hz, 3H), 1.00 – 0.91 (m, 11H), 0.55 (q, *J* = 7.9 Hz, 6H);

**<sup>13</sup>C NMR** (100 MHz, CDCl<sub>3</sub>) δ 164.0, 162.8, 136.6, 118.8, 118.7, 32.6, 31.5, 14.2, 11.7, 7.4, 3.3;

**HRMS (ESI)** calcd for [M+H]<sup>+</sup> C<sub>15</sub>H<sub>28</sub>NSi, *m/z*: 250.1986, found: 250.1985, Error 0.4 ppm;

**IR (KBr)**: 3060, 2952, 2874, 1590, 1454, 1016, 764, 732 cm<sup>-1</sup>.

*N*-methyl-*N*-((triethylsilyl)methyl)pyridin-2-amine (**2w**)

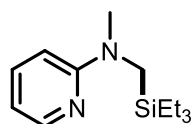

**2w**

The reaction was conducted according to the general procedure by using **1w** (61.1 mg, 0.5 mmol, 1.0 equiv), catalyst **B** (16.3 mg, 5 mol%), tbe (193.3 μL, 1.5 mmol, 3.0 equiv), Et<sub>3</sub>SiH (159.7 μL,

1.0 mmol, 2.0 equiv) and *o*-xylene (2 mL) at 140 °C for 36 h to give the silylation product **2w** (77.9 mg, 66% yield).

**<sup>1</sup>H NMR** (400 MHz, CDCl<sub>3</sub>) δ 8.15 – 8.06 (m, 1H), 7.43 – 7.34 (m, 1H), 6.47 – 6.38 (m, 2H), 3.13 (s, 2H), 3.04 (s, 3H), 0.95 (t, *J* = 7.9 Hz, 9H), 0.59 (q, *J* = 7.9 Hz, 6H);

**<sup>13</sup>C NMR** (100 MHz, CDCl<sub>3</sub>) δ 158.6, 147.6, 136.7, 110.1, 105.2, 38.2, 37.2, 7.3, 3.5;

**HRMS (ESI)** calcd for [M+H]<sup>+</sup> C<sub>13</sub>H<sub>25</sub>N<sub>2</sub>Si, *m/z*: 237.1782, found: 237.1781, Error 0 ppm;

**IR (KBr)**: 3048, 2953, 2874, 1598, 1017, 764, 730 cm<sup>-1</sup>.

2-(2-(triphenylsilyl)phenyl)pyridine (**2x**)

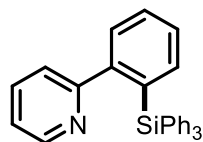

**2x**

The reaction was conducted according to the general procedure by using **1a** (77.6 mg, 0.5 mmol, 1.0 equiv), catalyst **B** (16.3 mg, 5 mol%), tbe (193.3 μL, 1.5 mmol, 3.0 equiv), Ph<sub>3</sub>SiH (260.4 mg, 1.0 mmol, 2.0 equiv) and *o*-xylene (2 mL) at 100 °C for 36 h to give the silylation product **2x** (134 mg, 65% yield). The single crystal of **2x** was grown by slow evaporation of a mixing solution of petroleum ether and ethyl acetate.

**<sup>1</sup>H NMR** (400 MHz, CDCl<sub>3</sub>) δ 7.96 – 7.89 (m, 1H), 7.67 – 7.60 (m, 2H), 7.55 (td, *J* = 7.5, 1.5 Hz, 1H), 7.49 – 7.38 (m, 8H), 7.32 (td, *J* = 7.4, 1.2 Hz, 1H), 7.28 – 7.23 (m, 3H), 7.23 – 7.17 (m, 6H), 6.77 – 6.70 (m, 1H);

**<sup>13</sup>C NMR** (100 MHz, CDCl<sub>3</sub>) δ 156.0, 147.0, 145.3, 140.5, 139.4, 136.2, 135.5, 133.6, 130.0, 128.3, 127.9, 127.1, 126.5, 121.9, 119.8;

**HRMS (ESI)** calcd for [M+H]<sup>+</sup> C<sub>29</sub>H<sub>24</sub>NSi, *m/z*: 414.1667, found: 414.1673, Error 1.2 ppm;

**IR (KBr)**: 3361, 3066, 2923, 1589, 1426, 1101, 701, 515 cm<sup>-1</sup>.

2-(2-(methyldiphenylsilyl)phenyl)pyridine (**2y**)

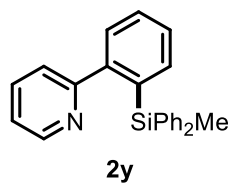

The reaction was conducted according to the general procedure by using **1a** (77.6 mg, 0.5 mmol, 1.0 equiv), catalyst **B** (16.3 mg, 5 mol%), tbe (193.3  $\mu$ L, 1.5 mmol, 3.0 equiv), Ph<sub>2</sub>MeSiH (199.3  $\mu$ L, 1.0 mmol, 2.0 equiv) and *o*-xylene (2 mL) at 100 °C for 24 h to give the silylation product **2y** (135.7 mg, 77% yield).

<sup>1</sup>H NMR (400 MHz, CDCl<sub>3</sub>)  $\delta$  8.22 – 8.16 (m, 1H), 7.65 (dt,  $J$  = 7.7, 1.1 Hz, 1H), 7.53 – 7.34 (m, 9H), 7.30 – 7.17 (m, 8H), 7.00 – 6.92 (m, 1H), 0.59 (s, 3H);

<sup>13</sup>C NMR (100 MHz, CDCl<sub>3</sub>)  $\delta$  158.9, 147.8, 146.8, 139.6, 138.8, 136.1, 135.3, 134.6, 129.5, 128.2, 127.9, 127.6, 127.4, 121.8, 121.8, -1.4;

HRMS (ESI) calcd for [M+H]<sup>+</sup> C<sub>24</sub>H<sub>22</sub>NSi,  $m/z$ : 352.1511, found: 352.1516, Error 1.5 ppm;

IR (KBr): 3065, 3006, 2955, 1588, 1427, 1103, 754, 495 cm<sup>-1</sup>.

2-(2-(dimethyl(phenyl)silyl)phenyl)pyridine (**2z**)

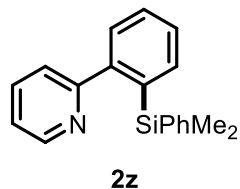

The reaction was conducted according to the general procedure by using **1a** (77.6 mg, 0.5 mmol, 1.0 equiv), catalyst **B** (16.3 mg, 5 mol%), tbe (193.3  $\mu$ L, 1.5 mmol, 3.0 equiv), PhMe<sub>2</sub>SiH (153.3  $\mu$ L, 1.0 mmol, 2.0 equiv) and *o*-xylene (2 mL) at 100 °C for 24 h to give the silylation product **2z** (119.9 mg, 83% yield).

<sup>1</sup>H NMR (400 MHz, CDCl<sub>3</sub>)  $\delta$  8.50 – 8.43 (m, 1H), 7.69 – 7.60 (m, 1H), 7.55 (td,  $J$  = 7.7, 1.8 Hz, 1H), 7.52 – 7.49 (m, 1H), 7.44 (td,  $J$  = 7.5, 1.4 Hz, 1H), 7.41 – 7.34 (m, 3H), 7.34 – 7.30 (m, 1H), 7.27 – 7.19 (m, 3H), 7.14 – 7.08 (m, 1H), 0.35 (s, 6H);

<sup>13</sup>C NMR (100 MHz, CDCl<sub>3</sub>)  $\delta$  160.5, 148.2, 147.1, 140.9, 137.2, 136.8, 136.1, 133.6, 129.1, 128.5, 128.2, 127.4, 127.4, 122.7, 121.8, -0.3;

HRMS (ESI) calcd for [M+H]<sup>+</sup> C<sub>19</sub>H<sub>20</sub>NSi,  $m/z$ : 290.1350, found: 290.1360, Error 3.5 ppm;

IR (KBr): 3065, 3001, 2952, 1587, 1426, 1108, 817, 702, 479 cm<sup>-1</sup>.

## 4. Ir-catalyzed silylation of $\delta$ C-H bonds of heteroarenes

### 4.1 Optimization conditions of $\delta$ C-H bonds of heteroarene **3a**

Table S2: Reaction Optimization<sup>a</sup>

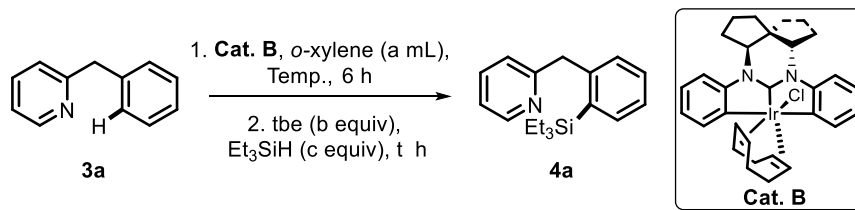

| Entry | a (mL) | Temp. (°C) | b (equiv) | c (equiv) | t (h) | Yield (%) <sup>b</sup> |
|-------|--------|------------|-----------|-----------|-------|------------------------|
| 1     | 2      | 100        | 3         | 2         | 18    | 42                     |
| 2     | 2      | 100        | 5         | 5         | 18    | 38                     |
| 3     | 2      | 100        | 3         | 2         | 24    | 45                     |
| 4     | 1      | 100        | 3         | 2         | 24    | 66                     |
| 5     | 0.5    | 100        | 3         | 2         | 24    | 73                     |
| 6     | 0.5    | 100        | 1.5       | 2         | 24    | 77                     |
| 7     | 0.5    | 120        | 1.5       | 2         | 18    | 80                     |
| 8     | 0.5    | 120        | 1.5       | 3         | 18    | 83                     |
| 9     | 0.5    | 120        | 1.5       | 3         | 24    | 84                     |

<sup>a</sup>Unless otherwise specified, reactions were conducted by pretreatment of a solution of **3a** (0.5 mmol) and **Cat. B** (5 mol%) in *o*-xylene (a mL) at 120 °C for 6 h, then tbe (b equiv) and  $\text{Et}_3\text{SiH}$  (c equiv) were added and reacted for t h. <sup>b</sup>Isolated yield.

### 4.2 Substrates scope of $\delta$ C-H bonds of heteroarenes

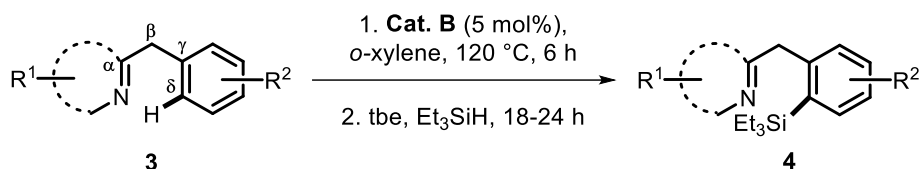

#### General procedure for $\delta$ C-H bonds of heteroarenes:

In glove box, to dry *o*-xylene were added substrate **3** (0.5 mmol) and **Cat. B** (5 mol%) in a 10 mL oven-dried Schlenk tube. The tube was taken out from the glove box, placed in a preheated oil bath and reacted for 6 h under stirring. After that, the mixture was cooled to room temperature, then tbe and  $\text{Et}_3\text{SiH}$  were added under argon atmosphere. After the reaction was completed, the reaction system was stirred in oil bath for further reaction. The resulting solution was concentrated *in vacuo*, and the residual was purified by silica gel column chromatography to give the silylation product **4**.

2-(2-(triethylsilyl)benzyl)pyridine (**4a**)



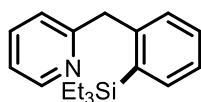

**4a**

The reaction was conducted according to the general procedure by using **3a** (84.6 mg, 0.5 mmol, 1.0 equiv), catalyst **B** (16.3 mg, 5 mol%), tbe (96.7  $\mu$ L, 0.75 mmol, 1.5 equiv), Et<sub>3</sub>SiH (239.6  $\mu$ L, 1.5 mmol, 3.0 equiv) and *o*-xylene (0.5 mL) at 120 °C for 18 h to give the silylation product **4a** (117.5 mg, 83% yield).

<sup>1</sup>H NMR (400 MHz, CDCl<sub>3</sub>)  $\delta$  8.57 (d,  $J$  = 4.5 Hz, 1H), 7.55 – 7.47 (m, 2H), 7.29 (t,  $J$  = 7.0 Hz, 1H), 7.22 (t,  $J$  = 7.2 Hz, 1H), 7.13 – 7.02 (m, 2H), 6.86 (d,  $J$  = 7.9 Hz, 1H), 4.34 (s, 2H), 0.95 – 0.88 (m, 9H), 0.86 – 0.77 (m, 6H);

<sup>13</sup>C NMR (100 MHz, CDCl<sub>3</sub>)  $\delta$  161.6, 149.1, 144.8, 136.2, 136.1, 135.9, 130.1, 129.1, 125.5, 123.0, 121.0, 44.5, 7.5, 4.1;

HRMS (ESI) calcd for [M+H]<sup>+</sup> C<sub>18</sub>H<sub>26</sub>NSi,  $m/z$ : 284.1829, found: 284.1826, Error 1.2 ppm;

IR (KBr): 3080, 2954, 2874, 1589, 1470, 1432, 701, 731 cm<sup>-1</sup>.

2-(4-methyl-2-(triethylsilyl)benzyl)pyridine (**4b**)

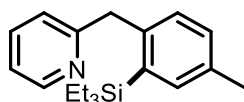

**4b**

The reaction was conducted according to the general procedure by using **3b** (91.6 mg, 0.5 mmol, 1.0 equiv), catalyst **B** (16.3 mg, 5 mol%), tbe (96.7  $\mu$ L, 0.75 mmol, 1.5 equiv), Et<sub>3</sub>SiH (239.6  $\mu$ L, 1.5 mmol, 3.0 equiv) and *o*-xylene (0.5 mL) at 120 °C for 18 h to give the silylation product **4b** (129.3 mg, 87% yield).

<sup>1</sup>H NMR (400 MHz, CDCl<sub>3</sub>)  $\delta$  8.56 (d,  $J$  = 3.9 Hz, 1H), 7.54 – 7.45 (m, 1H), 7.31 (s, 1H), 7.09 (t,  $J$  = 7.6 Hz, 2H), 6.98 (d,  $J$  = 7.8 Hz, 1H), 6.87 (d,  $J$  = 7.9 Hz, 1H), 4.30 (s, 2H), 2.33 (s, 3H), 0.91 (t,  $J$  = 7.5 Hz, 9H), 0.84 – 0.78 (m, 6H);

<sup>13</sup>C NMR (100 MHz, CDCl<sub>3</sub>)  $\delta$  161.9, 149.0, 141.7, 136.5, 136.2, 135.9, 134.6, 130.1, 129.9, 122.9, 120.9, 44.0, 21.1, 7.5, 4.1;

HRMS (ESI) calcd for [M+H]<sup>+</sup> C<sub>19</sub>H<sub>28</sub>NSi,  $m/z$ : 298.1986, found: 298.1987, Error -0.4 ppm;

IR (KBr): 3006, 2953, 2874, 1588, 1471, 788, 734 cm<sup>-1</sup>.

2-(4-(tert-butyl)-2-(triethylsilyl)benzyl)pyridine (**4c**)

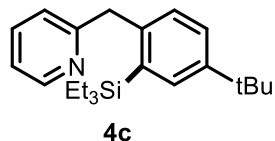

The reaction was conducted according to the general procedure by using **3c** (112.7 mg, 0.5 mmol, 1.0 equiv), catalyst **B** (16.3 mg, 5 mol%), tbe (96.7  $\mu$ L, 0.75 mmol, 1.5 equiv), Et<sub>3</sub>SiH (239.6  $\mu$ L, 1.5 mmol, 3.0 equiv) and *o*-xylene (0.5 mL) at 120 °C for 18 h to give the silylation product **4c** (140.8 mg, 83% yield).

**<sup>1</sup>H NMR** (400 MHz, CDCl<sub>3</sub>)  $\delta$  8.56 (d,  $J$  = 4.6 Hz, 1H), 7.55 (s, 1H), 7.51 (t,  $J$  = 7.7 Hz 1H), 7.30 (d,  $J$  = 8.0 Hz, 1H), 7.11 – 7.05 (m, 1H), 7.00 (d,  $J$  = 8.1 Hz, 1H), 6.89 (d,  $J$  = 7.8 Hz, 1H), 4.30 (s, 2H), 1.32 (s, 9H), 0.98 – 0.89 (m, 9H), 0.86 – 0.78 (m, 6H);

**<sup>13</sup>C NMR** (100 MHz, CDCl<sub>3</sub>)  $\delta$  161.8, 149.0, 147.6, 141.7, 136.2, 135.4, 132.8, 129.7, 126.0, 123.1, 120.9, 44.0, 34.3, 31.3, 7.6, 4.3;

**HRMS (ESI)** calcd for [M+H]<sup>+</sup> C<sub>22</sub>H<sub>34</sub>NSi,  $m/z$ : 340.2455, found: 340.2466, Error -3.1 ppm;

**IR (KBr)**: 3055, 2955, 2873, 1589, 1472, 750, 731 cm<sup>-1</sup>.

2-ylmethyl)-3-(triethylsilyl)aniline (**4d**)

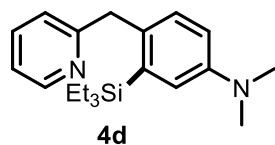

The reaction was conducted according to the general procedure by using **3d** (106.1 mg, 0.5 mmol, 1.0 equiv), catalyst **B** (16.3 mg, 5 mol%), tbe (96.7  $\mu$ L, 0.75 mmol, 1.5 equiv), Et<sub>3</sub>SiH (239.6  $\mu$ L, 1.5 mmol, 3.0 equiv) and *o*-xylene (0.5 mL) at 120 °C for 18 h to give the silylation product **4d** (150.1 mg, 92% yield).

**<sup>1</sup>H NMR** (400 MHz, CDCl<sub>3</sub>)  $\delta$  8.55 (d,  $J$  = 4.2 Hz, 1H), 7.49 (t,  $J$  = 7.6 Hz, 1H), 7.10 – 7.03 (m, 1H), 6.99 – 6.92 (m, 2H), 6.88 (d,  $J$  = 7.9 Hz, 1H), 6.75 – 6.70 (m, 1H), 4.24 (s, 2H), 2.93 (s, 6H), 0.92 (t,  $J$  = 7.6 Hz, 9H), 0.80 (q,  $J$  = 7.4 Hz, 6H);

**<sup>13</sup>C NMR** (100 MHz, CDCl<sub>3</sub>)  $\delta$  162.5, 148.8, 148.1, 136.4, 136.1, 132.6, 131.0, 122.9, 120.7, 120.2, 113.6, 43.4, 40.6, 7.5, 4.2;

**HRMS (ESI)** calcd for  $[M+H]^+$   $C_{20}H_{31}N_2Si$ ,  $m/z$ : 327.2251, found: 327.2239, Error 3.7 ppm;

**IR (KBr)**: 3064, 2953, 2873, 1683, 1594, 802, 732  $cm^{-1}$ .

2-(4-methoxy-2-(triethylsilyl)benzyl)pyridine (**4e**)

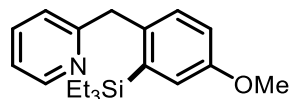

**4e**

The reaction was conducted according to the general procedure by using **3e** (99.6 mg, 0.5 mmol, 1.0 equiv), catalyst **B** (16.3 mg, 5 mol%), tbe (96.7  $\mu$ L, 0.75 mmol, 1.5 equiv),  $Et_3SiH$  (239.6  $\mu$ L, 1.5 mmol, 3.0 equiv) and *o*-xylene (0.5 mL) at 120  $^{\circ}C$  for 18 h to give the silylation product **4e** (144.1 mg, 92% yield).

**$^1H$  NMR** (400 MHz,  $CDCl_3$ )  $\delta$  8.56 (d,  $J = 4.2$  Hz, 1H), 7.58 – 7.43 (m, 1H), 7.12 – 7.06 (m, 2H), 7.02 (d,  $J = 8.4$  Hz, 1H), 6.91 – 6.78 (m, 2H), 4.27 (s, 2H), 3.79 (s, 3H), 0.91 (t,  $J = 7.6$  Hz, 9H), 0.85 – 0.76 (m, 6H);

**$^{13}C$  NMR** (100 MHz,  $CDCl_3$ )  $\delta$  162.0, 157.2, 149.0, 137.7, 136.7, 136.1, 131.2, 122.9, 121.8, 120.9, 113.6, 54.9, 43.6, 7.4, 4.0;

**HRMS (ESI)** calcd for  $[M+H]^+$   $C_{19}H_{28}NOSi$ ,  $m/z$ : 314.1935, found: 314.1936, Error -0.3 ppm;

**IR (KBr)**: 3065, 2953, 2874, 1589, 1229, 734, 708  $cm^{-1}$ .

2-(5-methoxy-2-(triethylsilyl)benzyl)pyridine (**4f**)

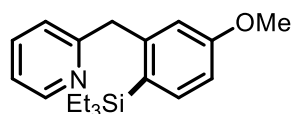

**4f**

The reaction was conducted according to the general procedure by using **3f** (99.6 mg, 0.5 mmol, 1.0 equiv), catalyst **B** (16.3 mg, 5 mol%), tbe (96.7  $\mu$ L, 0.75 mmol, 1.5 equiv),  $Et_3SiH$  (239.6  $\mu$ L, 1.5 mmol, 3.0 equiv) and *o*-xylene (0.5 mL) at 120  $^{\circ}C$  for 24 h to give the silylation product **4f** (100.2 mg, 64% yield).

**$^1H$  NMR** (400 MHz,  $CDCl_3$ )  $\delta$  8.57 (d,  $J = 4.3$  Hz, 1H), 7.57 – 7.49 (m, 1H), 7.44 (d,  $J = 8.3$  Hz, 1H), 7.14 – 7.07 (m, 1H), 6.90 (d,  $J = 7.9$  Hz, 1H), 6.83 – 6.77 (m, 1H), 6.64 (d,  $J = 2.2$  Hz, 1H), 4.30 (s, 2H), 3.73 (s, 3H), 0.90 (t,  $J = 7.6$  Hz, 9H), 0.83 – 0.73 (m, 6H);

$^{13}\text{C}$  NMR (100 MHz,  $\text{CDCl}_3$ )  $\delta$  161.4, 160.4, 149.1, 146.7, 137.3, 136.3, 127.0, 123.1, 121.1, 116.2, 110.9, 54.8, 44.5, 7.5, 4.3;

**HRMS (ESI)** calcd for  $[\text{M}+\text{H}]^+$   $\text{C}_{19}\text{H}_{28}\text{NOSi}$ ,  $m/z$ : 314.1935, found: 314.1941, Error -2.1 ppm;

**IR (KBr)**: 3065, 2953, 2873, 1591, 1227, 786, 733  $\text{cm}^{-1}$ .

2-(2-methoxy-6-(triethylsilyl)benzyl)pyridine (**4g**)

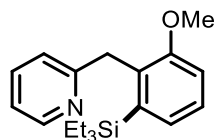

**4g**

The reaction was conducted according to the general procedure by using **3g** (99.6 mg, 0.5 mmol, 1.0 equiv), catalyst **B** (16.3 mg, 5 mol%), tbe (96.7  $\mu\text{L}$ , 0.75 mmol, 1.5 equiv),  $\text{Et}_3\text{SiH}$  (239.6  $\mu\text{L}$ , 1.5 mmol, 3.0 equiv) and *o*-xylene (0.5 mL) at 120  $^\circ\text{C}$  for 24 h to give the silylation product **4g** (65.9 mg, 42% yield).

$^1\text{H}$  NMR (400 MHz,  $\text{CDCl}_3$ )  $\delta$  8.59 – 8.50 (m, 1H), 7.44 (td,  $J = 7.7, 1.8$  Hz, 1H), 7.29 (t,  $J = 7.8$  Hz, 1H), 7.16 – 7.11 (m, 1H), 7.08 – 7.01 (m, 1H), 6.94 (d,  $J = 8.0$  Hz, 1H), 6.64 (d,  $J = 7.9$  Hz, 1H), 4.35 (s, 2H), 3.67 (s, 3H), 0.88 – 0.82 (m, 9H), 0.79 – 0.69 (m, 6H);

$^{13}\text{C}$  NMR (100 MHz,  $\text{CDCl}_3$ )  $\delta$  161.7, 157.9, 148.7, 138.6, 135.9, 132.5, 127.9, 127.3, 121.4, 120.5, 111.5, 55.2, 39.1, 7.5, 4.2;

**HRMS (ESI)** calcd for  $[\text{M}+\text{H}]^+$   $\text{C}_{19}\text{H}_{28}\text{NOSi}$ ,  $m/z$ : 314.1935, found: 314.1936, Error 0.3 ppm;

**IR (KBr)**: 3360, 3060, 2953, 2874, 1588, 1259, 1003, 730  $\text{cm}^{-1}$ .

2-(2-(triethylsilyl)phenoxy)pyridine (**4h**)

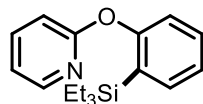

**4h**

The reaction was conducted according to the general procedure by using **3h** (85.6 mg, 0.5 mmol, 1.0 equiv), catalyst **B** (16.3 mg, 5 mol%), tbe (96.7  $\mu\text{L}$ , 0.75 mmol, 1.5 equiv),  $\text{Et}_3\text{SiH}$  (239.6  $\mu\text{L}$ , 1.5 mmol, 3.0 equiv) and *o*-xylene (0.5 mL) at 120  $^\circ\text{C}$  for 18 h to give the silylation product **4h** (134.0 mg, 94% yield).

**<sup>1</sup>H NMR** (400 MHz, CDCl<sub>3</sub>) δ 8.14 – 8.07 (m, 1H), 7.58 – 7.50 (m, 1H), 7.41 (dd, *J* = 7.3, 1.4 Hz, 1H), 7.30 – 7.23 (m, 1H), 7.11 – 7.04 (m, 1H), 6.93 (d, *J* = 8.1 Hz, 1H), 6.88 – 6.81 (m, 1H), 6.74 (d, *J* = 8.3 Hz, 1H), 0.82 (t, *J* = 7.7 Hz, 9H), 0.73 – 0.63 (m, 6H);

**<sup>13</sup>C NMR** (100 MHz, CDCl<sub>3</sub>) δ 163.7, 159.0, 147.7, 139.1, 136.3, 130.2, 128.7, 124.1, 120.6, 118.1, 111.3, 7.4, 3.3;

**HRMS (ESI)** calcd for [M+Na]<sup>+</sup> C<sub>17</sub>H<sub>23</sub>NOSiNa, *m/z*: 308.1441, found: 308.1439, Error 0.8 ppm;

**IR (KBr)**: 3060, 2953, 2874, 1594, 1465, 1424, 1192, 737 cm<sup>-1</sup>.

2-(2-(triethylsilyl)-4-(trifluoromethyl)benzyl)pyridine (**4i**)

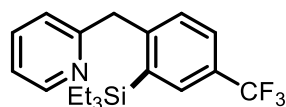

**4i**

The reaction was conducted according to the general procedure by using **3i** (118.6 mg, 0.5 mmol, 1.0 equiv), catalyst **B** (16.3 mg, 5 mol%), tbe (96.7 μL, 0.75 mmol, 1.5 equiv), Et<sub>3</sub>SiH (239.6 μL, 1.5 mmol, 3.0 equiv) and *o*-xylene (0.5 mL) at 120 °C for 24 h to give the silylation product **4i** (147.7 mg, 84% yield).

**<sup>1</sup>H NMR** (400 MHz, CDCl<sub>3</sub>) δ 8.59 (d, *J* = 4.3 Hz, 1H), 7.74 (s, 1H), 7.64 – 7.46 (m, 2H), 7.19 (d, *J* = 8.1 Hz, 1H), 7.17 – 7.11 (m, 1H), 6.89 (d, *J* = 7.8 Hz, 1H), 4.38 (s, 2H), 0.96 – 0.90 (m, 9H), 0.90 – 0.84 (m, 6H);

**<sup>13</sup>C NMR** (100 MHz, CDCl<sub>3</sub>) δ 160.5, 149.4, 149.1, 137.6, 136.5, 132.2, 132.2, 130.2, 128.3, 127.9, 127.6, 127.3, 125.9, 125.8, 123.2, 123.1, 121.4, 44.3, 7.4, 4.0;

**<sup>19</sup>F NMR** (376 MHz, CDCl<sub>3</sub>) δ -62.3, -62.3;

**HRMS (ESI)** calcd for [M+H]<sup>+</sup> C<sub>19</sub>H<sub>25</sub>F<sub>3</sub>NSi, *m/z*: 352.1703, found: 352.1707, Error -1.1 ppm;

**IR (KBr)**: 3065, 3005, 2952, 2873, 1591, 1077, 750, 733 cm<sup>-1</sup>.

2-(2-(triethylsilyl)-5-(trifluoromethyl)benzyl)pyridine (**4j**)

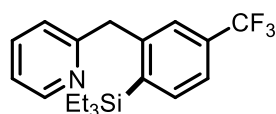

**4j**

The reaction was conducted according to the general procedure by using **3j** (118.6 mg, 0.5 mmol, 1.0 equiv), catalyst **B** (16.3 mg, 5 mol%), tbe (96.7  $\mu$ L, 0.75 mmol, 1.5 equiv), Et<sub>3</sub>SiH (239.6  $\mu$ L, 1.5 mmol, 3.0 equiv) and *o*-xylene (0.5 mL) at 120 °C for 24 h to give the silylation product **4j** (112.4 mg, 64% yield).

**<sup>1</sup>H NMR** (400 MHz, CDCl<sub>3</sub>)  $\delta$  8.60 (d,  $J$  = 3.9 Hz, 1H), 7.64 (d,  $J$  = 7.8 Hz, 1H), 7.61 – 7.54 (m, 1H), 7.47 (d,  $J$  = 7.7 Hz, 1H), 7.33 (s, 1H), 7.21 – 7.11 (m, 1H), 6.86 (d,  $J$  = 7.8 Hz, 1H), 4.38 (s, 2H), 0.95 – 0.88 (m, 9H), 0.88 – 0.81 (m, 6H);

**<sup>13</sup>C NMR** (100 MHz, CDCl<sub>3</sub>)  $\delta$  160.4, 149.4, 145.7, 141.4, 136.6, 136.3, 131.6, 131.2, 130.9, 126.3, 126.3, 125.5, 123.0, 122.8, 122.1, 122.0, 121.4, 44.3, 7.4, 3.9;

**<sup>19</sup>F NMR** (376 MHz, CDCl<sub>3</sub>)  $\delta$  -62.9;

**HRMS (ESI)** calcd for [M+H]<sup>+</sup> C<sub>19</sub>H<sub>25</sub>F<sub>3</sub>NSi,  $m/z$ : 352.1703, found: 352.1711, Error -2.1 ppm;

**IR (KBr)**: 3069, 3009, 2956, 2876, 1591, 1126, 782, 732 cm<sup>-1</sup>.

2-(4-fluoro-2-(triethylsilyl)benzyl)pyridine (**4k**)

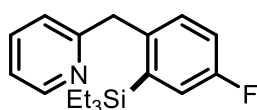

**4k**

The reaction was conducted according to the general procedure by using **3k** (93.6 mg, 0.5 mmol, 1.0 equiv), catalyst **B** (16.3 mg, 5 mol%), tbe (96.7  $\mu$ L, 0.75 mmol, 1.5 equiv), Et<sub>3</sub>SiH (239.6  $\mu$ L, 1.5 mmol, 3.0 equiv) and *o*-xylene (0.5 mL) at 120 °C for 24 h to give the silylation product **4k** (132.5 mg, 88% yield).

**<sup>1</sup>H NMR** (400 MHz, CDCl<sub>3</sub>)  $\delta$  8.60 – 8.54 (m, 1H), 7.58 – 7.51 (m, 1H), 7.23 – 7.16 (m, 1H), 7.14 – 7.08 (m, 1H), 7.07 – 7.02 (m, 1H), 7.00 – 6.93 (m, 1H), 6.87 (d,  $J$  = 7.9 Hz, 1H), 4.29 (s, 2H), 0.94 – 0.87 (m, 9H), 0.85 – 0.77 (m, 6H);

**<sup>13</sup>C NMR** (100 MHz, CDCl<sub>3</sub>)  $\delta$  162.3, 161.3, 159.9, 149.2, 140.4, 140.3, 139.2, 139.2, 136.3, 131.7, 131.7, 122.9, 122.1, 121.9, 121.1, 115.9, 115.7, 43.6, 7.4, 3.9;

**<sup>19</sup>F NMR** (376 MHz, CDCl<sub>3</sub>)  $\delta$  -117.8, -117.8, -117.8;

**HRMS (ESI)** calcd for [M+H]<sup>+</sup> C<sub>18</sub>H<sub>25</sub>FNSi,  $m/z$ : 302.1735, found: 302.1735, Error -0.1 ppm;

**IR (KBr)**: 3064, 2954, 2875, 1588, 1473, 749, 707 cm<sup>-1</sup>.

1-(2-(triethylsilyl)benzyl)-1H-pyrazole (**4l**)

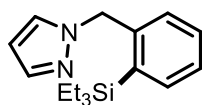

**4l**

The reaction was conducted according to the general procedure by using **3l** (79.1 mg, 0.5 mmol, 1.0 equiv), catalyst **B** (16.3 mg, 5 mol%), tbe (96.7  $\mu$ L, 0.75 mmol, 1.5 equiv), Et<sub>3</sub>SiH (239.6  $\mu$ L, 1.5 mmol, 3.0 equiv) and *o*-xylene (0.5 mL) at 120 °C for 18 h to give the silylation product **4l** (119.8 mg, 88% yield).

<sup>1</sup>H NMR (400 MHz, CDCl<sub>3</sub>)  $\delta$  7.49 (d,  $J$  = 1.0 Hz, 1H), 7.46 – 7.42 (m, 1H), 7.26 – 7.14 (m, 2H), 7.11 (d,  $J$  = 1.8 Hz, 1H), 6.80 (d,  $J$  = 7.0 Hz, 1H), 6.17 (t,  $J$  = 1.9 Hz, 1H), 5.35 (s, 2H), 0.86 (t,  $J$  = 7.5 Hz, 9H), 0.81 – 0.72 (m, 6H);

<sup>13</sup>C NMR (100 MHz, CDCl<sub>3</sub>)  $\delta$  142.1, 139.3, 135.7, 135.1, 129.5, 129.2, 128.0, 127.0, 105.7, 55.8, 7.4, 4.1;

HRMS (ESI) calcd for [M+Na]<sup>+</sup> C<sub>16</sub>H<sub>24</sub>N<sub>2</sub>SiNa,  $m/z$ : 295.1601, found: 295.1597, Error 1.3 ppm;

IR (KBr): 3057, 2953, 2874, 1512, 1087, 1003, 734 cm<sup>-1</sup>.

1-(2-(triethylsilyl)benzyl)isoquinoline (**4m**)

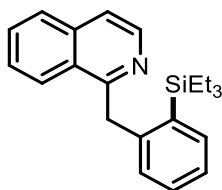

**4m**

The reaction was conducted according to the general procedure by using **3m** (109.6 mg, 0.5 mmol, 1.0 equiv), catalyst **B** (16.3 mg, 5 mol%), tbe (96.7  $\mu$ L, 0.75 mmol, 1.5 equiv), Et<sub>3</sub>SiH (239.6  $\mu$ L, 1.5 mmol, 3.0 equiv) and *o*-xylene (0.5 mL) at 120 °C for 24 h to give the silylation product **4m** (123.3 mg, 74% yield).

<sup>1</sup>H NMR (400 MHz, CDCl<sub>3</sub>)  $\delta$  8.52 (d,  $J$  = 5.8 Hz, 1H), 7.88 (d,  $J$  = 8.5 Hz, 1H), 7.84 (d,  $J$  = 8.2 Hz, 1H), 7.66 – 7.58 (m, 2H), 7.57 – 7.52 (m, 1H), 7.49 – 7.42 (m, 1H), 7.16 (t,  $J$  = 7.1 Hz, 1H), 7.08 (td,  $J$  = 7.5, 1.4 Hz, 1H), 6.59 (d,  $J$  = 7.6 Hz, 1H), 4.82 (s, 2H), 1.07 – 0.97 (m, 15H);

$^{13}\text{C}$  NMR (100 MHz,  $\text{CDCl}_3$ )  $\delta$  160.4, 145.7, 142.1, 136.4, 135.8, 135.1, 129.8, 129.1, 128.2, 127.4, 127.3, 127.1, 126.0, 125.3, 119.8, 42.9, 7.6, 4.1;

**HRMS (ESI)** calcd for  $[\text{M}+\text{H}]^+$   $\text{C}_{22}\text{H}_{28}\text{NSi}$ ,  $m/z$ : 334.1986, found: 334.1982, Error 1.2 ppm;

**IR (KBr)**: 3053, 2953, 2873, 1623, 1587, 823, 732  $\text{cm}^{-1}$ .

3-(2-(triethylsilyl)benzyl)isoquinoline (**4n**)

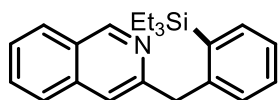

**4n**

The reaction was conducted according to the general procedure by using **3n** (109.6 mg, 0.5 mmol, 1.0 equiv), catalyst **B** (16.3 mg, 5 mol%), tbe (96.7  $\mu\text{L}$ , 0.75 mmol, 1.5 equiv),  $\text{Et}_3\text{SiH}$  (239.6  $\mu\text{L}$ , 1.5 mmol, 3.0 equiv) and *o*-xylene (0.5 mL) at 120  $^\circ\text{C}$  for 24 h to give the silylation product **4n** (108.3 mg, 65% yield).

$^1\text{H}$  NMR (400 MHz,  $\text{CDCl}_3$ )  $\delta$  7.99 (d,  $J = 8.4$  Hz, 1H), 7.83 – 7.77 (m, 1H), 7.76 – 7.69 (m, 1H), 7.48 – 7.39 (m, 1H), 7.33 – 7.16 (m, 6H), 4.29 (s, 2H), 1.05 – 0.87 (m, 15H);

$^{13}\text{C}$  NMR (100 MHz,  $\text{CDCl}_3$ )  $\delta$  159.5, 152.4, 139.8, 138.6, 136.8, 136.5, 129.2, 128.5, 128.5, 126.2, 125.9, 125.3, 120.9, 45.6, 7.8, 4.1;

**HRMS (ESI)** calcd for  $[\text{M}+\text{Na}]^+$   $\text{C}_{22}\text{H}_{27}\text{NSiNa}$ ,  $m/z$ : 356.1805, found: 356.1801, Error 1.2 ppm;

**IR (KBr)**: 3057, 2951, 2872, 1600, 1494, 1007, 720  $\text{cm}^{-1}$ .



## 5. Ir-catalyzed silylation of $\alpha$ , $\beta$ C-H bonds of *N*, *O*, *S*-heteroarenes

### 5.1 Substrates scope of $\alpha$ , $\beta$ C-H bonds of heteroarenes

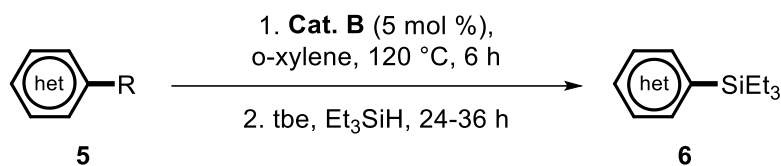

#### General procedure for $\alpha$ , $\beta$ C-H bonds of heteroarenes:

In glove box, to dry *o*-xylene were added substrate **5** (0.5 mmol) and **Cat. B** (5 mol%) in a 10 mL oven-dried Schlenk tube. The tube was taken out from the glove box, placed in a preheated oil bath and reacted for 6 h under stirring. After that, the mixture was cooled to room temperature, then tbe and Et<sub>3</sub>SiH were added under argon atmosphere. The reaction system was stirred in oil bath for further reaction. After the reaction was completed, the resulting solution was concentrated *in vacuo*, and the residual was purified by silica gel column chromatography to give the silylation product **6**.

#### benzo[b]thiophen-2-yl-triethylsilane (**6a**)

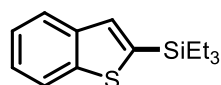

**6a**

The reaction was conducted according to the general procedure by using **5a** (67.1 mg, 0.5 mmol, 1.0 equiv), catalyst **B** (16.3 mg, 5 mol%), tbe (193.3  $\mu$ L, 1.5 mmol, 3.0 equiv), Et<sub>3</sub>SiH (159.7  $\mu$ L, 1.0 mmol, 2.0 equiv) and *o*-xylene (0.5 mL) at 120 °C for 24 h to give the silylation product **6a** (84.4 mg, 68% yield).

<sup>1</sup>H NMR (400 MHz, CDCl<sub>3</sub>)  $\delta$  7.89 (d, *J* = 7.8 Hz, 1H), 7.84 – 7.80 (m, 1H), 7.47 (s, 1H), 7.38 – 7.27 (m, 2H), 1.03 (t, *J* = 7.7 Hz, 9H), 0.90 – 0.82 (m, 6H);

<sup>13</sup>C NMR (100 MHz, CDCl<sub>3</sub>)  $\delta$  143.5, 141.0, 139.0, 131.5, 124.0, 123.9, 123.3, 122.1, 7.3, 4.2;

HRMS (ESI) calcd for [M+H]<sup>+</sup> C<sub>14</sub>H<sub>21</sub>SSi, *m/z*: 249.1128, found: 249.1125, Error 1.1 ppm;

IR (KBr): 3057, 2954, 2874, 1454, 1018, 738, 725 cm<sup>-1</sup>.

#### benzofuran-2-yl-triethylsilane (**6b**)

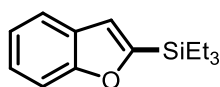

**6b**

The reaction was conducted according to the general procedure by using **5b** (59.1 mg, 0.5 mmol, 1.0 equiv), catalyst **B** (16.3 mg, 5 mol%), tbe (193.3  $\mu$ L, 1.5 mmol, 3.0 equiv), Et<sub>3</sub>SiH (159.7  $\mu$ L, 1.0 mmol, 2.0 equiv) and *o*-xylene (0.5 mL) at 120 °C for 24 h to give the silylation product **6b** (89.4 mg, 77% yield).

**<sup>1</sup>H NMR** (400 MHz, CDCl<sub>3</sub>)  $\delta$  7.56 (d,  $J$  = 7.6 Hz, 1H), 7.50 (d,  $J$  = 7.8 Hz, 1H), 7.25 (t,  $J$  = 7.7 Hz, 1H), 7.18 (t,  $J$  = 7.4 Hz, 1H), 6.97 (s, 1H), 1.03 (t,  $J$  = 7.6 Hz, 9H), 0.89 – 0.81 (m, 6H);

**<sup>13</sup>C NMR** (100 MHz, CDCl<sub>3</sub>)  $\delta$  161.6, 158.1, 128.0, 124.1, 122.2, 120.8, 117.2, 111.3, 7.3, 3.1;

**HRMS (ESI)** calcd for [M+Na]<sup>+</sup> C<sub>14</sub>H<sub>20</sub>OSiNa,  $m/z$ : 255.1176, found: 255.1175, Error 0.2 ppm;

**IR (KBr)**: 3101, 2955, 2876, 1525, 1296, 1009, 743 cm<sup>-1</sup>.

2-(triethylsilyl)-1H-indole (**6c**)

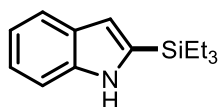

**6c**

The reaction was conducted according to the general procedure by using **5c** (58.6 mg, 0.5 mmol, 1.0 equiv), catalyst **B** (16.3 mg, 5 mol%), tbe (193.3  $\mu$ L, 1.5 mmol, 3.0 equiv), Et<sub>3</sub>SiH (159.7  $\mu$ L, 1.0 mmol, 2.0 equiv) and *o*-xylene (0.5 mL) at 120 °C for 24 h to give the silylation product **6c** (71.7 mg, 62% yield).

**<sup>1</sup>H NMR** (400 MHz, CDCl<sub>3</sub>)  $\delta$  8.08 (s, 1H), 7.63 (d,  $J$  = 7.8 Hz, 1H), 7.39 (d,  $J$  = 8.1 Hz, 1H), 7.21 – 7.13 (m, 1H), 7.08 (t,  $J$  = 7.4 Hz, 1H), 6.74 (d,  $J$  = 0.9 Hz, 1H), 1.02 (t,  $J$  = 7.8 Hz, 9H), 0.84 (q,  $J$  = 7.4 Hz, 6H);

**<sup>13</sup>C NMR** (100 MHz, CDCl<sub>3</sub>)  $\delta$  138.6, 135.6, 128.7, 122.1, 120.4, 119.5, 112.3, 110.7, 7.4, 3.6;

**HRMS (ESI)** calcd for [M+Na]<sup>+</sup> C<sub>14</sub>H<sub>21</sub>NSiNa,  $m/z$ : 254.1335, found: 254.1332, Error 1.5 ppm;

**IR (KBr)**: 3424, 3051, 2954, 2874, 1497, 1013, 790, 738 cm<sup>-1</sup>.

1-tosyl-3-(triethylsilyl)-1H-indole (**6d**)

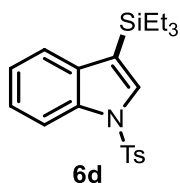

The reaction was conducted according to the general procedure by using **5d** (135.7 mg, 0.5 mmol, 1.0 equiv), catalyst **B** (16.3 mg, 5 mol%), tbe (193.3  $\mu$ L, 1.5 mmol, 3.0 equiv), Et<sub>3</sub>SiH (159.7  $\mu$ L, 1.0 mmol, 2.0 equiv) and *o*-xylene (0.5 mL) at 120 °C for 24 h to give the silylation product **6d** (140.6 mg, 73% yield).

<sup>1</sup>H NMR (400 MHz, CDCl<sub>3</sub>)  $\delta$  7.94 (d,  $J$  = 8.2 Hz, 1H), 7.75 (d,  $J$  = 8.4 Hz, 2H), 7.57 (d,  $J$  = 7.8 Hz, 1H), 7.53 (s, 1H), 7.31 – 7.26 (m, 1H), 7.24 – 7.19 (m, 3H), 2.33 (s, 3H), 0.97 – 0.91 (m, 9H), 0.89 – 0.82 (m, 6H);

<sup>13</sup>C NMR (100 MHz, CDCl<sub>3</sub>)  $\delta$  144.8, 135.8, 135.2, 135.0, 132.5, 129.8, 126.8, 124.2, 123.0, 122.4, 115.1, 113.4, 21.6, 7.4, 3.6;

HRMS (ESI) calcd for [M+Na]<sup>+</sup> C<sub>21</sub>H<sub>27</sub>NO<sub>2</sub>SSiNa,  $m/z$ : 408.1424, found: 408.1419, Error 1.3 ppm;

IR (KBr): 3065, 2955, 2874, 1598, 1046, 858, 748 cm<sup>-1</sup>.

5-methoxy-2-(triethylsilyl)-1H-indole (**6e**)

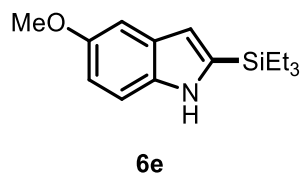

The reaction was conducted according to the general procedure by using **5e** (73.6 mg, 0.5 mmol, 1.0 equiv), catalyst **B** (16.3 mg, 5 mol%), tbe (193.3  $\mu$ L, 1.5 mmol, 3.0 equiv), Et<sub>3</sub>SiH (159.7  $\mu$ L, 1.0 mmol, 2.0 equiv) and *o*-xylene (0.5 mL) at 120 °C for 24 h to give the silylation product **6e** (108.4 mg, 83% yield).

<sup>1</sup>H NMR (400 MHz, CDCl<sub>3</sub>)  $\delta$  8.05 (s, 1H), 7.26 (d,  $J$  = 8.8 Hz, 1H), 7.09 (d,  $J$  = 1.6 Hz, 1H), 6.88 – 6.81 (m, 1H), 6.66 (d,  $J$  = 0.8 Hz, 1H), 3.84 (s, 3H), 1.01 (t,  $J$  = 7.8 Hz, 9H), 0.86 – 0.77 (m, 6H);

<sup>13</sup>C NMR (100 MHz, CDCl<sub>3</sub>)  $\delta$  154.0, 136.4, 133.9, 129.0, 112.7, 111.8, 111.4, 101.6, 55.8, 7.4, 3.5;

HRMS (ESI) calcd for [M+Na]<sup>+</sup> C<sub>15</sub>H<sub>23</sub>NOSiNa,  $m/z$ : 284.1441, found: 284.1437, Error 1.5 ppm;

IR (KBr): 3425, 3026, 2992, 2874, 1620, 1018, 736, 705 cm<sup>-1</sup>.

6-methoxy-2-(triethylsilyl)-1H-indole (**6f**)

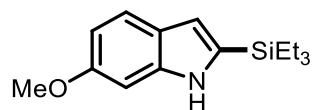

**6f**

The reaction was conducted according to the general procedure by using **5f** (73.6 mg, 0.5 mmol, 1.0 equiv), catalyst **B** (16.3 mg, 5 mol%), tbe (193.3  $\mu$ L, 1.5 mmol, 3.0 equiv), Et<sub>3</sub>SiH (159.7  $\mu$ L, 1.0 mmol, 2.0 equiv) and *o*-xylene (0.5 mL) at 120 °C for 24 h to give the silylation product **6f** (86.2 mg, 66% yield). The single crystal of **6f** was grown by slow evaporation of a mixing solution of petroleum ether and dichloromethane.

**<sup>1</sup>H NMR** (400 MHz, CDCl<sub>3</sub>)  $\delta$  8.01 (s, 1H), 7.49 (d,  $J$  = 8.6 Hz, 1H), 6.87 (s, 1H), 6.77 (dd,  $J$  = 8.6, 2.1 Hz, 1H), 6.66 (d,  $J$  = 0.9 Hz, 1H), 3.82 (s, 3H), 1.01 (t,  $J$  = 7.8 Hz, 9H), 0.81 (q,  $J$  = 7.7 Hz, 6H);

**<sup>13</sup>C NMR** (100 MHz, CDCl<sub>3</sub>)  $\delta$  156.5, 139.4, 134.1, 123.0, 120.9, 112.3, 109.8, 93.9, 55.6, 7.4, 3.5;

**HRMS (ESI)** calcd for [M+Na]<sup>+</sup> C<sub>15</sub>H<sub>23</sub>NOSNa,  $m/z$ : 284.1441, found: 284.1438, Error 0.9 ppm;

**IR (KBr)**: 3386, 3067, 2954, 2874, 1621, 1020, 737, 704 cm<sup>-1</sup>.

7-methoxy-2-(triethylsilyl)-1H-indole (**6g**)

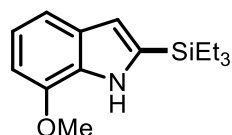

**6g**

The reaction was conducted according to the general procedure by using **5g** (73.6 mg, 0.5 mmol, 1.0 equiv), catalyst **B** (16.3 mg, 5 mol%), tbe (193.3  $\mu$ L, 1.5 mmol, 3.0 equiv), Et<sub>3</sub>SiH (159.7  $\mu$ L, 1.0 mmol, 2.0 equiv) and *o*-xylene (0.5 mL) at 120 °C for 36 h to give the silylation product **6g** (95.3 mg, 73% yield).

**<sup>1</sup>H NMR** (400 MHz, CDCl<sub>3</sub>)  $\delta$  8.30 (s, 1H), 7.24 (d,  $J$  = 7.1 Hz, 1H), 7.00 (t,  $J$  = 7.8 Hz, 1H), 6.71 (d,  $J$  = 2.2 Hz, 1H), 6.62 (d,  $J$  = 7.5 Hz, 1H), 3.97 (s, 3H), 1.01 (t,  $J$  = 7.8 Hz, 9H), 0.87 – 0.78 (m, 6H);

$^{13}\text{C}$  NMR (100 MHz,  $\text{CDCl}_3$ )  $\delta$  145.8, 135.0, 129.9, 129.3, 119.9, 113.1, 112.5, 101.5, 55.2, 7.4, 3.5;

**HRMS (ESI)** calcd for  $[\text{M}+\text{Na}]^+$   $\text{C}_{15}\text{H}_{23}\text{NOSiNa}$ ,  $m/z$ : 284.1441, found: 284.1438, Error 1.1 ppm;

**IR (KBr)**: 3429, 3067, 2954, 2874, 1580, 1105, 723  $\text{cm}^{-1}$ .

5-fluoro-2-(triethylsilyl)-1H-indole (**6h**)

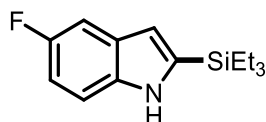

**6h**

The reaction was conducted according to the general procedure by using **5h** (67.6 mg, 0.5 mmol, 1.0 equiv), catalyst **B** (16.3 mg, 5 mol%), tbe (193.3  $\mu\text{L}$ , 1.5 mmol, 3.0 equiv),  $\text{Et}_3\text{SiH}$  (159.7  $\mu\text{L}$ , 1.0 mmol, 2.0 equiv) and *o*-xylene (0.5 mL) at 120  $^\circ\text{C}$  for 36 h to give the silylation product **6h** (71.0 mg, 57% yield).

$^1\text{H}$  NMR (400 MHz,  $\text{CDCl}_3$ )  $\delta$  8.09 (s, 1H), 7.30 (dd,  $J = 8.8, 4.4$  Hz, 1H), 7.26 (dd,  $J = 8.0, 2.5$  Hz, 1H), 6.93 (td,  $J = 9.0, 2.5$  Hz, 1H), 6.70 – 6.67 (m, 1H), 1.02 (t,  $J = 7.8$  Hz, 9H), 0.89 – 0.78 (m, 6H);

$^{13}\text{C}$  NMR (100 MHz,  $\text{CDCl}_3$ )  $\delta$  158.9, 156.6, 137.9, 135.1, 128.9, 128.8, 112.2, 112.1, 111.2, 111.1, 110.6, 110.4, 105.0, 104.8, 7.4, 3.4;

$^{19}\text{F}$  NMR (376 MHz,  $\text{CDCl}_3$ )  $\delta$  -125.4;

**HRMS (ESI)** calcd for  $[\text{M}+\text{Na}]^+$   $\text{C}_{14}\text{H}_{20}\text{FNSiNa}$ ,  $m/z$ : 272.1241, found: 272.1241, Error -0.1 ppm;

**IR (KBr)**: 3470, 3061, 2955, 2875, 1502, 1141, 764, 749  $\text{cm}^{-1}$ .

7-fluoro-2-(triethylsilyl)-1H-indole (**6i**)

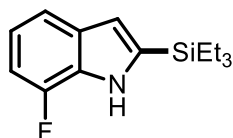

**6i**

The reaction was conducted according to the general procedure by using **5a** (67.6 mg, 0.5 mmol, 1.0 equiv), catalyst **B** (16.3 mg, 5 mol%), tbe (193.3  $\mu\text{L}$ , 1.5 mmol, 3.0 equiv),  $\text{Et}_3\text{SiH}$  (159.7  $\mu\text{L}$ ,

1.0 mmol, 2.0 equiv) and *o*-xylene (0.5 mL) at 120 °C for 36 h to give the silylation product **6a** (54.8 mg, 44% yield).

**<sup>1</sup>H NMR** (400 MHz, CDCl<sub>3</sub>) δ 8.22 (s, 1H), 7.39 (dd, *J* = 7.9 Hz, 0.4 Hz, 1H), 7.02 – 6.96 (m, 1H), 6.91 – 6.84 (m, 1H), 6.78 – 6.74 (m, 1H), 1.02 (t, *J* = 7.8 Hz, 9H), 0.89 – 0.81 (m, 6H);

**<sup>13</sup>C NMR** (100 MHz, CDCl<sub>3</sub>) δ 150.6, 148.1, 136.7, 132.4, 132.4, 127.1, 126.9, 119.7, 119.7, 116.1, 116.1, 112.8, 112.7, 106.7, 106.6, 7.4, 3.4;

**<sup>19</sup>F NMR** (376 MHz, CDCl<sub>3</sub>) δ -135.2;

**HRMS (ESI)** calcd for [M+Na]<sup>+</sup> C<sub>14</sub>H<sub>20</sub>FNSiNa, *m/z*: 272.1241, found: 272.1247, Error -2.2 ppm;

**IR (KBr)**: 3478, 3071, 2956, 2875, 1581, 1017, 803, 726 cm<sup>-1</sup>.

triethyl(5-phenylthiophen-2-yl)silane (**6j**)

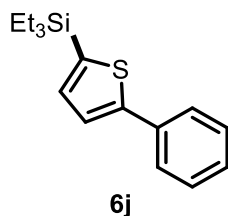

The reaction was conducted according to the general procedure by using **5j** (80.1 mg, 0.5 mmol, 1.0 equiv), catalyst **B** (16.3 mg, 5 mol%), tbe (193.3 μL, 1.5 mmol, 3.0 equiv), Et<sub>3</sub>SiH (159.7 μL, 1.0 mmol, 2.0 equiv) and *o*-xylene (0.5 mL) at 120 °C for 24 h to give the silylation product **6j** (98.7 mg, 72% yield).

**<sup>1</sup>H NMR** (400 MHz, CDCl<sub>3</sub>) δ 7.62 (d, *J* = 7.2 Hz, 2H), 7.40 – 7.33 (m, 3H), 7.29 – 7.22 (m, 1H), 7.20 (d, *J* = 3.4 Hz, 1H), 1.02 (t, *J* = 7.8 Hz, 9H), 0.89 – 0.76 (m, 6H);

**<sup>13</sup>C NMR** (100 MHz, CDCl<sub>3</sub>) δ 149.6, 136.5, 135.7, 134.4, 128.8, 127.4, 126.0, 124.3, 7.4, 4.4;

**HRMS (ESI)** calcd for [M+Na]<sup>+</sup> C<sub>16</sub>H<sub>22</sub>SSiNa, *m/z*: 297.1104, found: 297.1109, Error -1.8 ppm;

**IR (KBr)**: 3058, 2953, 2874, 1600, 1237, 1004, 737 cm<sup>-1</sup>.

(5-benzylthiophen-2-yl)triethylsilane (**6k**)

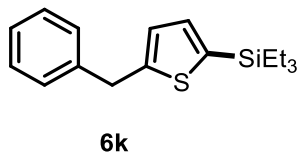

The reaction was conducted according to the general procedure by using **5k** (87.1 mg, 0.5 mmol, 1.0 equiv), catalyst **B** (16.3 mg, 5 mol%), tbe (193.3  $\mu$ L, 1.5 mmol, 3.0 equiv), Et<sub>3</sub>SiH (159.7  $\mu$ L, 1.0 mmol, 2.0 equiv) and *o*-xylene (0.5 mL) at 120 °C for 24 h to give the silylation product **6k** (93.6 mg, 65% yield).

<sup>1</sup>H NMR (400 MHz, CDCl<sub>3</sub>)  $\delta$  7.34 – 7.19 (m, 5H), 7.05 (d, *J* = 3.2 Hz, 1H), 6.84 (d, *J* = 3.1 Hz, 1H), 4.17 (s, 2H), 0.97 (t, *J* = 7.8 Hz, 9H), 0.80 – 0.71 (m, 6H);

<sup>13</sup>C NMR (100 MHz, CDCl<sub>3</sub>)  $\delta$  149.3, 140.4, 135.3, 134.7, 128.7, 128.5, 126.5, 126.4, 36.0, 7.4, 4.4;

HRMS (ESI) calcd for [M+Na]<sup>+</sup> C<sub>17</sub>H<sub>24</sub>SSiNa, *m/z*: 311.1260, found: 311.1260, Error 0.0 ppm;

IR (KBr): 3063, 3003, 2874, 1604, 1454, 737, 699 cm<sup>-1</sup>.

(5-benzylfuran-2-yl)triethylsilane (**6l**)

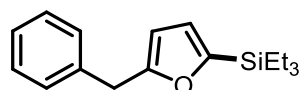

**6l**

The reaction was conducted according to the general procedure by using **5l** (79.1 mg, 0.5 mmol, 1.0 equiv), catalyst **B** (16.3 mg, 5 mol%), tbe (193.3  $\mu$ L, 1.5 mmol, 3.0 equiv), Et<sub>3</sub>SiH (159.7  $\mu$ L, 1.0 mmol, 2.0 equiv) and *o*-xylene (0.5 mL) at 120 °C for 24 h to give the silylation product **6l** (96.6 mg, 71% yield).

<sup>1</sup>H NMR (400 MHz, CDCl<sub>3</sub>)  $\delta$  7.33 – 7.26 (m, 2H), 7.26 – 7.17 (m, 3H), 6.53 (d, *J* = 3.0 Hz, 1H), 5.93 (d, *J* = 2.9 Hz, 1H), 4.00 (s, 2H), 0.97 (t, *J* = 7.9 Hz, 9H), 0.77 – 0.69 (m, 6H);

<sup>13</sup>C NMR (100 MHz, CDCl<sub>3</sub>)  $\delta$  158.9, 157.0, 138.4, 128.7, 128.4, 126.3, 121.5, 106.1, 34.7, 7.3, 3.2;

HRMS (ESI) calcd for [M+Na]<sup>+</sup> C<sub>17</sub>H<sub>24</sub>OSiNa, *m/z*: 295.1489, found: 295.1482, Error 2.2 ppm;

IR (KBr): 3064, 2954, 2875, 1683, 1012, 738, 722 cm<sup>-1</sup>.

2-methyl-8-(triethylsilyl)quinoline (**6m**)

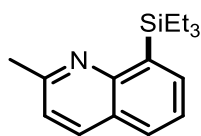

**6m**

The reaction was conducted according to the general procedure by using **5m** (71.6 mg, 0.5 mmol, 1.0 equiv), catalyst **B** (16.3 mg, 5 mol%), tbe (193.3  $\mu$ L, 1.5 mmol, 3.0 equiv), Et<sub>3</sub>SiH (159.7  $\mu$ L, 1.0 mmol, 2.0 equiv) and *o*-xylene (0.5 mL) at 120 °C for 24 h to give the silylation product **6m** (79.7 mg, 62% yield).

<sup>1</sup>H NMR (400 MHz, CDCl<sub>3</sub>)  $\delta$  7.94 (d,  $J$  = 8.4 Hz, 1H), 7.79 (d,  $J$  = 6.7 Hz, 1H), 7.74 – 7.69 (m, 1H), 7.44 – 7.37 (m, 1H), 7.19 (d,  $J$  = 8.4 Hz, 1H), 2.67 (s, 3H), 1.05 – 1.00 (m, 6H), 0.99 – 0.92 (m, 9H);

<sup>13</sup>C NMR (100 MHz, CDCl<sub>3</sub>)  $\delta$  157.1, 152.5, 138.5, 136.6, 135.9, 128.4, 125.6, 125.0, 121.2, 25.1, 7.8, 4.3;

HRMS (ESI) calcd for [M+H]<sup>+</sup> C<sub>16</sub>H<sub>24</sub>NSi,  $m/z$ : 258.1673, found: 258.1671, Error 0.5 ppm;

IR (KBr): 3044, 2952, 2730, 1605, 1008, 798, 724 cm<sup>-1</sup>.

2-methyl-8-(triethylsilyl)-6-(trifluoromethyl)quinoline (**6n**)

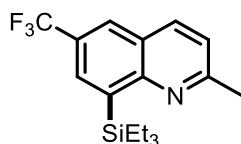

**6n**

The reaction was conducted according to the general procedure by using **5n** (105.6 mg, 0.5 mmol, 1.0 equiv), catalyst **B** (16.3 mg, 5 mol%), tbe (193.3  $\mu$ L, 1.5 mmol, 3.0 equiv), Et<sub>3</sub>SiH (159.7  $\mu$ L, 1.0 mmol, 2.0 equiv) and *o*-xylene (0.5 mL) at 120 °C for 24 h to give the silylation product **6n** (107.3 mg, 66% yield).

<sup>1</sup>H NMR (400 MHz, CDCl<sub>3</sub>)  $\delta$  8.05 (d,  $J$  = 8.5 Hz, 2H), 7.92 (s, 1H), 7.31 (d,  $J$  = 8.4 Hz, 1H), 2.73 (s, 3H), 1.08 – 1.00 (m, 6H), 0.95 (t,  $J$  = 7.4 Hz, 9H);

<sup>13</sup>C NMR (100 MHz, CDCl<sub>3</sub>)  $\delta$  159.7, 153.4, 140.8, 136.8, 131.7, 131.7, 126.9, 126.6, 126.4, 126.4, 125.9, 124.4, 123.2, 122.4, 25.3, 7.7, 4.0;

<sup>19</sup>F NMR (564 MHz, CDCl<sub>3</sub>)  $\delta$  -62.0;

HRMS (ESI) calcd for [M+H]<sup>+</sup> C<sub>17</sub>H<sub>23</sub>F<sub>3</sub>NSi,  $m/z$ : 326.1546, found: 326.1558, Error -3.4 ppm;



**IR (KBr):** 3036, 2955, 2875, 1608, 1281, 1127, 749 cm<sup>-1</sup>.

6-methoxy-2-methyl-8-(triethylsilyl)quinoline (**6o**)

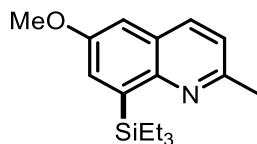

**6o**

The reaction was conducted according to the general procedure by using **5o** (86.6 mg, 0.5 mmol, 1.0 equiv), catalyst **B** (16.3 mg, 5 mol%), tbe (193.3  $\mu$ L, 1.5 mmol, 3.0 equiv), Et<sub>3</sub>SiH (159.7  $\mu$ L, 1.0 mmol, 2.0 equiv) and *o*-xylene (0.5 mL) at 120 °C for 24 h to give the silylation product **6o** (123.5 mg, 86% yield).

**<sup>1</sup>H NMR** (400 MHz, CDCl<sub>3</sub>)  $\delta$  7.84 (d,  $J$  = 8.3 Hz, 1H), 7.45 (d,  $J$  = 2.9 Hz, 1H), 7.14 (d,  $J$  = 8.3 Hz, 1H), 6.96 (d,  $J$  = 2.8 Hz, 1H), 3.87 (s, 3H), 2.63 (s, 3H), 1.08 – 0.99 (m, 6H), 0.98 – 0.91 (m, 9H);

**<sup>13</sup>C NMR** (100 MHz, CDCl<sub>3</sub>)  $\delta$  156.3, 154.6, 148.5, 140.6, 134.8, 129.1, 126.5, 121.4, 105.5, 55.2, 24.8, 7.8, 4.0;

**HRMS (ESI)** calcd for [M+H]<sup>+</sup> C<sub>17</sub>H<sub>26</sub>NOSi,  $m/z$ : 288.1778, found: 288.1788, Error -3.5 ppm;

**IR (KBr):** 3048, 2952, 2873, 1604, 1229, 851, 730 cm<sup>-1</sup>.

4-(triethylsilyl)acridine (**6p**)

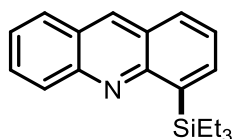

**6p**

The reaction was conducted according to the general procedure by using **5p** (89.6 mg, 0.5 mmol, 1.0 equiv), catalyst **B** (16.3 mg, 5 mol%), tbe (193.3  $\mu$ L, 1.5 mmol, 3.0 equiv), Et<sub>3</sub>SiH (159.7  $\mu$ L, 1.0 mmol, 2.0 equiv) and *o*-xylene (0.5 mL) at 120 °C for 24 h to give the silylation product **6p** (121.7 mg, 83% yield).

**<sup>1</sup>H NMR** (400 MHz, CDCl<sub>3</sub>)  $\delta$  8.70 (s, 1H), 8.22 (d,  $J$  = 8.8 Hz, 1H), 7.97 (d,  $J$  = 8.4 Hz, 2H), 7.91 (d,  $J$  = 6.4 Hz, 1H), 7.73 (t,  $J$  = 7.6 Hz, 1H), 7.55 – 7.46 (m, 2H), 1.13 (q,  $J$  = 7.6 Hz, 6H), 0.99 (t,  $J$  = 7.7 Hz, 9H);

$^{13}\text{C}$  NMR (100 MHz,  $\text{CDCl}_3$ )  $\delta$  153.1, 148.1, 139.5, 137.8, 135.5, 129.9, 129.4, 129.1, 127.9, 126.1, 126.0, 125.4, 125.3, 7.9, 4.1;

**HRMS (ESI)** calcd for  $[\text{M}+\text{H}]^+$   $\text{C}_{19}\text{H}_{24}\text{NSi}$ ,  $m/z$ : 294.1673, found: 294.1682, Error -3.3 ppm;

**IR (KBr)**: 3052, 2952, 2871, 1661, 1515, 1007, 741  $\text{cm}^{-1}$ .

*N*-phenyl-2-(triethylsilyl)aniline (**6q**)

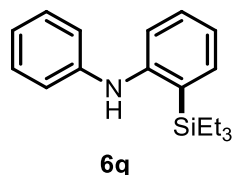

The reaction was conducted according to the general procedure by using **5q** (84.6 mg, 0.5 mmol, 1.0 equiv), catalyst **B** (16.3 mg, 5 mol%), tbe (193.3  $\mu\text{L}$ , 1.5 mmol, 3.0 equiv),  $\text{Et}_3\text{SiH}$  (159.7  $\mu\text{L}$ , 1.0 mmol, 2.0 equiv) and *o*-xylene (0.5 mL) at 140  $^\circ\text{C}$  for 36 h to give the silylation product **6q** (58.1 mg, 41% yield).

$^1\text{H}$  NMR (400 MHz,  $\text{CDCl}_3$ )  $\delta$  7.44 (d,  $J = 7.2$  Hz, 1H), 7.29 (d,  $J = 3.6$  Hz, 2H), 7.22 (t,  $J = 7.7$  Hz, 2H), 7.06 – 6.99 (m, 1H), 6.94 – 6.81 (m, 3H), 5.58 (s, 1H), 0.96 (t,  $J = 7.6$  Hz, 9H), 0.88 – 0.79 (m, 6H);

$^{13}\text{C}$  NMR (100 MHz,  $\text{CDCl}_3$ )  $\delta$  148.1, 144.6, 136.5, 130.0, 129.3, 128.5, 122.2, 120.4, 119.9, 116.5, 7.6, 3.8;

**HRMS (ESI)** calcd for  $[\text{M}+\text{H}]^+$   $\text{C}_{18}\text{H}_{26}\text{NSi}$ ,  $m/z$ : 284.1829, found: 284.1823, Error 2.3 ppm;

**IR (KBr)**: 3437, 3047, 2952, 2874, 1498, 1004, 745, 692  $\text{cm}^{-1}$ .

2-methyl-6-((triethylsilyl)methyl)pyridine (**6r**)

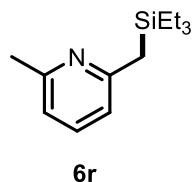

The reaction was conducted according to the general procedure by using **5r** (53.6 mg, 0.5 mmol, 1.0 equiv), catalyst **B** (16.3 mg, 5 mol%), tbe (193.3  $\mu\text{L}$ , 1.5 mmol, 3.0 equiv),  $\text{Et}_3\text{SiH}$  (159.7  $\mu\text{L}$ , 1.0 mmol, 2.0 equiv) and *o*-xylene (0.5 mL) at 140  $^\circ\text{C}$  for 36 h to give the silylation product **6r** (60.8 mg, 55% yield).

**<sup>1</sup>H NMR** (400 MHz, CDCl<sub>3</sub>) δ 7.36 (t, *J* = 7.7 Hz, 1H), 6.81 (d, *J* = 7.6 Hz, 1H), 6.76 (d, *J* = 7.7 Hz, 1H), 2.47 (s, 3H), 2.33 (s, 2H), 0.90 (t, *J* = 7.9 Hz, 9H), 0.54 (q, *J* = 7.9 Hz, 6H);

**<sup>13</sup>C NMR** (100 MHz, CDCl<sub>3</sub>) δ 160.8, 157.3, 135.9, 119.0, 118.3, 25.4, 24.5, 7.2, 3.2;

**HRMS (ESI)** calcd for [M+H]<sup>+</sup> C<sub>13</sub>H<sub>24</sub>NSi, *m/z*: 222.1673, found: 222.1672, Error 0.3 ppm;

**IR (KBr)**: 3061, 2953, 2875, 1588, 1576, 1017, 797, 749 cm<sup>-1</sup>.

## 6. Mechanism investigations

### 6.1. Synthesis of iridicycle intermediates **1bB** and **3dB**

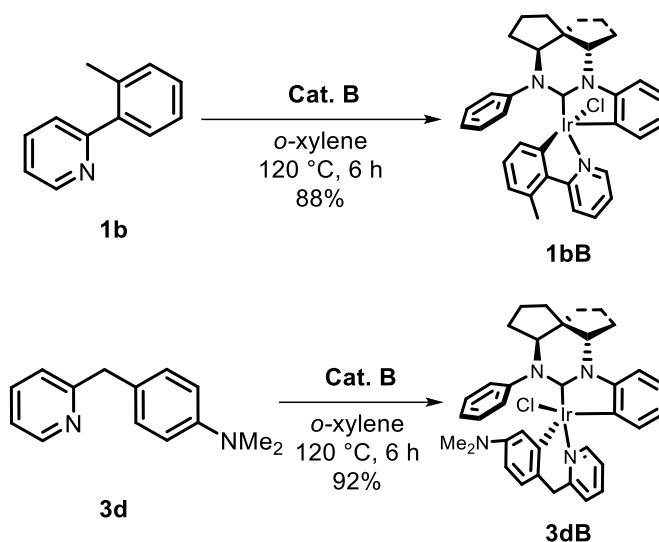

#### General procedure:

In glove box, to a solution of **Cat. B** (65 mg, 0.1 mmol, 1.0 equiv) in *o*-xylene (3 mL) was added substrates **1b** (25.4 mg, 0.15 mmol, 1.5 equiv) or **3d** (31.8 mg, 0.15 mmol, 1.5 equiv), the tubes were taken out from glove box and stirred at 120 °C for 6 h. After the reactions were completed, red-brown solutions were obtained, the resulting solutions were treated with *n*-pentane to give two brown precipitates. After that, supernatants were separated and the residuals were washed by *n*-pentane, respectively, until **1b** or **3d** was disappeared completely (monitored by TLC). Then the solvent was removed *in vacuo*, affording solid products **1bB** (62.6 mg, 88% yield) or **3dB** (69.4 mg, 92% yield). The single crystals of **1bB** and **3dB** were grown by slow evaporation of a mixing solution of petroleum ether and benzene.

#### Iridicycle complex **1bB**:

**HRMS (ESI)** calcd for  $[M-Cl]^+$   $C_{34}H_{33}IrN_3$ ,  $m/z$ : 676.2300, found: 676.2274, Error 3.6 ppm;

**IR (KBr)**: 3046, 2960, 2871, 1599, 1460, 1028, 727  $cm^{-1}$ .

#### Iridicycle complex **3dB**:

**HRMS (ESI)** calcd for  $[M-Cl]^+$   $C_{36}H_{38}IrN_4$ ,  $m/z$ : 719.2722, found: 719.2699, Error 2.9 ppm;

**IR (KBr)**: 3068, 2919, 2849, 1596, 1463, 1268, 879, 760  $cm^{-1}$ .



## 6.2 Synthesis of 2-(pentadeuteriophenyl)pyridine **1a-D<sub>5</sub>**

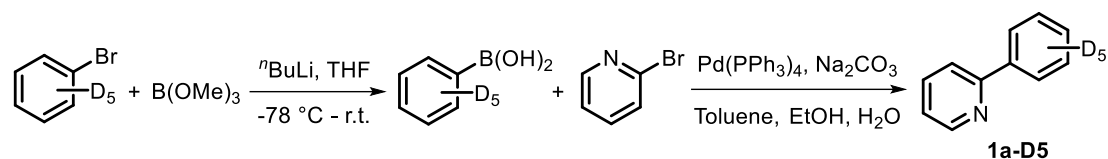

According to the literature,<sup>11</sup> to a solution of bromobenzene- $D_5$  (0.63 mL, 6 mmol, 1.0 equiv) in dry THF (20 mL) was added  $nBuLi$  (1.6 M in hexane, 9 mmol, 5.6 mL, 1.5 equiv) under argon atmosphere at  $-78\text{ }^\circ\text{C}$ . The mixture was stirred for 1 h, then  $B(OMe)_3$  (1.25 g, 12 mmol, 2.0 equiv) was added. The system was reacted for further 1 h and allowed to warm to room temperature. After the reaction was quenched by 1N HCl and extracted with ethyl acetate. The combined organic layer was dried over anhydrous  $Na_2SO_4$  and concentrated *in vacuo*, to give an off-white solid used next step without further purification.

To a 100 mL round-bottom flask was added  $Pd(PPh_3)_4$  (231 mg, 5 mol%),  $Na_2CO_3$  (2.97 g, 28 mmol, 7.0 equiv), and phenylboronic acid- $D_5$  (0.61 g, 4.8 mmol, 1.2 equiv), after that, the solvent of toluene (15 mL), ethanol (2 mL), degassed  $H_2O$  (15 mL) combined with 2-bromopyridine (0.63 g, 4.0 mmol, 1.0 equiv) were added dropwise under argon atmosphere. The reaction mixture was refluxed for 12 h. After the reaction was completed, the mixture was cooled to room temperature. Water was added, the system was extracted with dichloromethane, dried over anhydrous  $Na_2SO_4$ , and concentrated *in vacuo*. The residual was purified by silica gel column chromatography to afford deuterated product **1a-D<sub>5</sub>**.

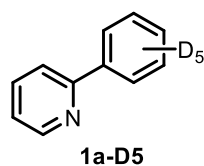

2-(pentadeuteriophenyl)pyridine (**1a-D<sub>5</sub>**)

$^1\text{H NMR}$  (400 MHz,  $CDCl_3$ )  $\delta$  8.68 (d,  $J = 4.7$  Hz, 1H), 7.72 – 7.64 (m, 2H), 7.22 – 7.13 (m, 1H);

$^{13}\text{C NMR}$  (100 MHz,  $CDCl_3$ )  $\delta$  157.22, 149.50, 139.05, 136.61, 128.34, 128.09, 127.85, 127.52, 126.57, 126.33, 126.09, 121.95, 120.40.

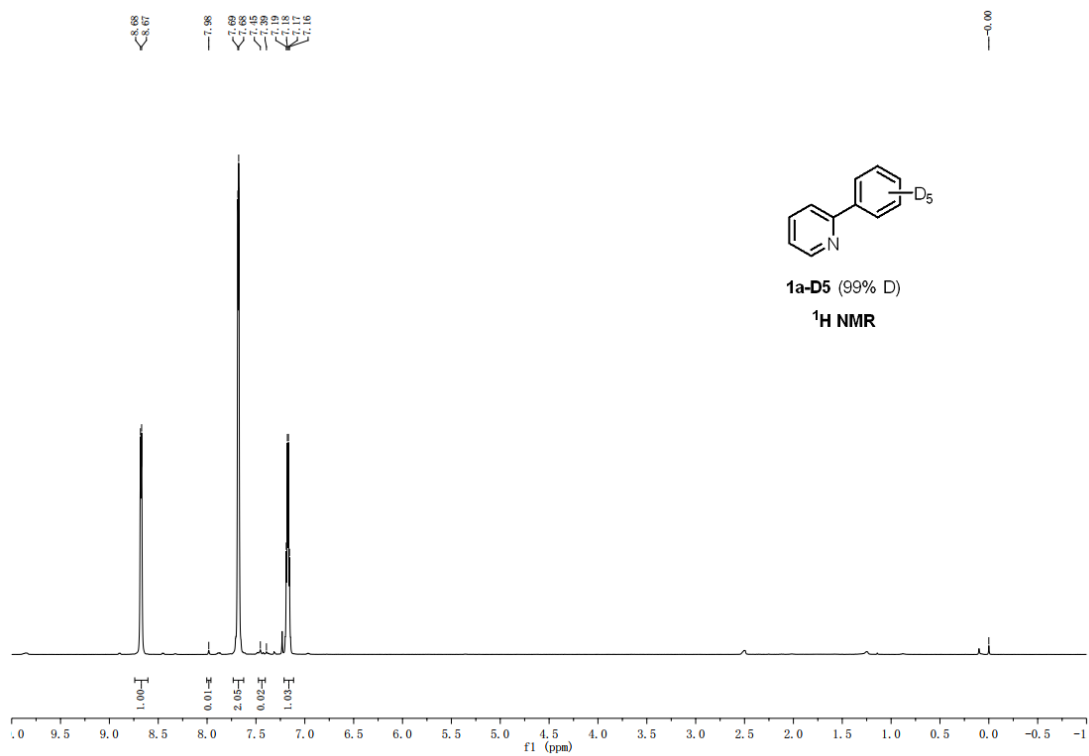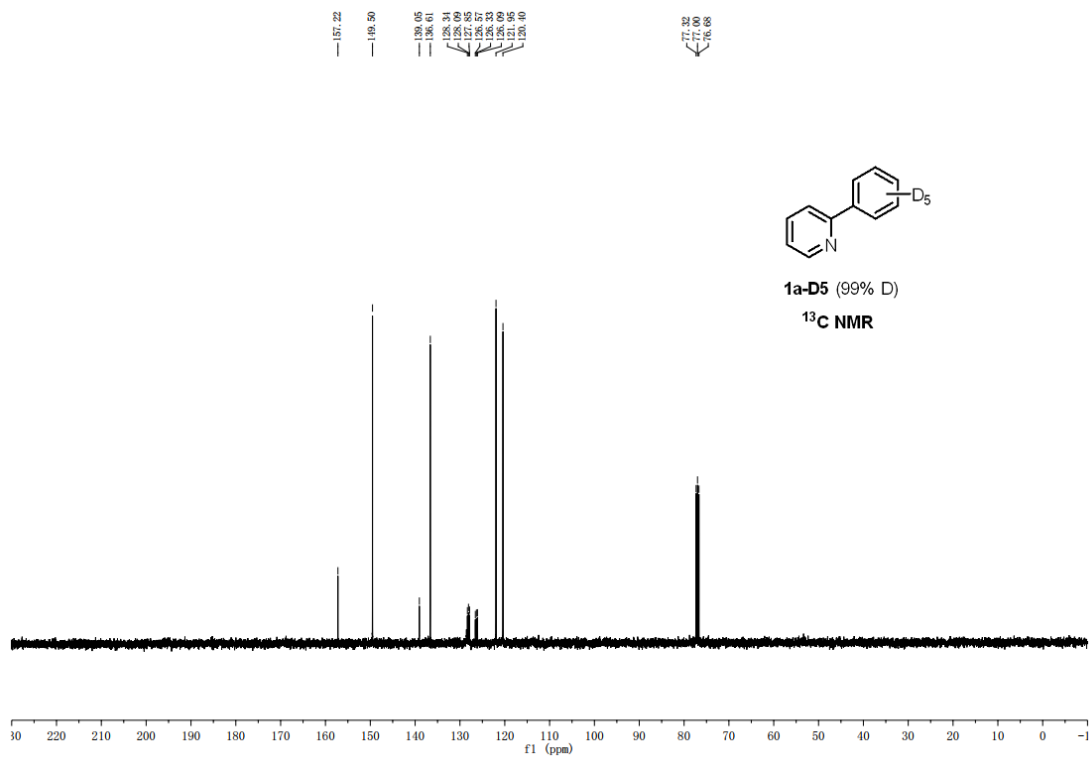

### 6.3. Hydrogen-deuterium exchange experiment

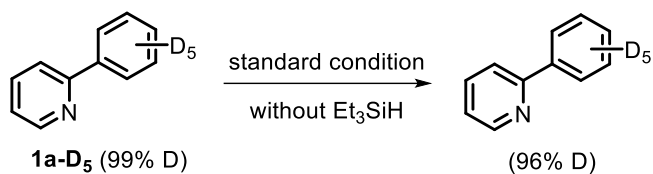

In glove box, to dry *o*-xylene (2 mL) were added **1a-D<sub>5</sub>** (99% D, 80.1 mg, 0.5 mmol, 1.0 equiv) and **Cat. B** (16.3 mg, 5 mol%) in a 10 mL oven-dried Schlenk tube. The system reacted at 100 °C outside of glove box for 6 h. After that, the mixture was cooled down to room temperature, then tbe (193.3 μL, 1.5 mmol, 3.0 equiv) was added under argon atmosphere. The system was stirred at 100 °C for 18 h. The resulting solution was concentrated *in vacuo*, and the residual was purified by silica gel column chromatography to give the corresponding product (96% D).

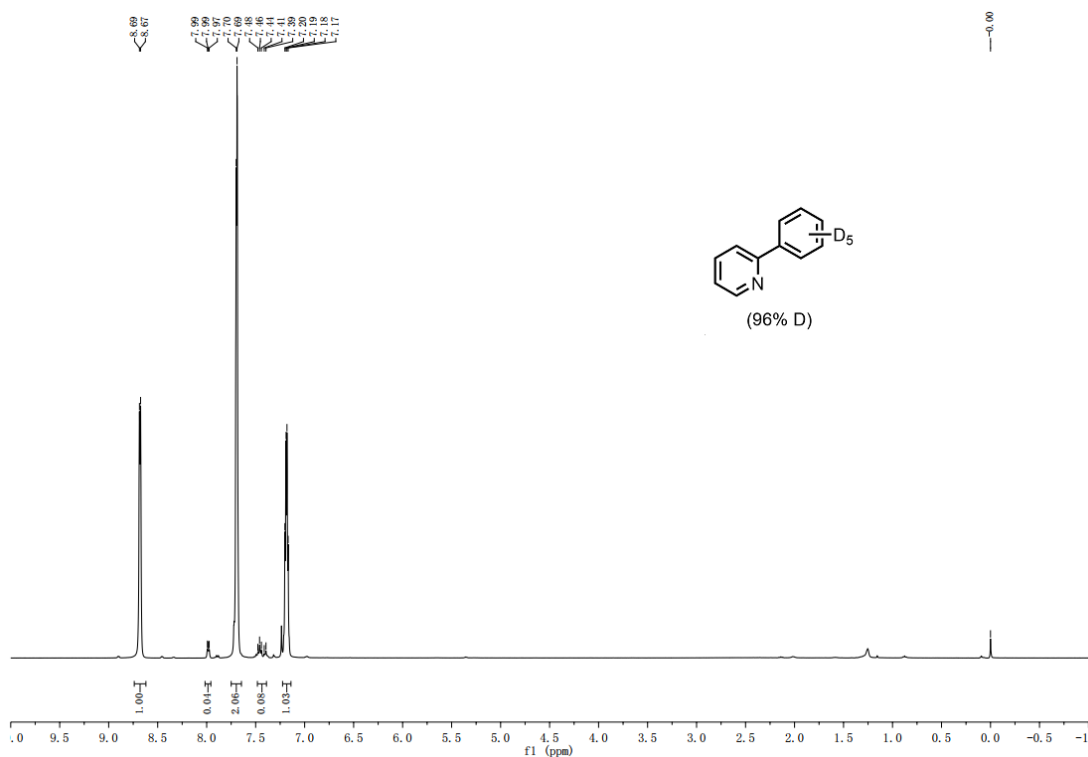



#### 6.4. KIE determined from parallel reactions

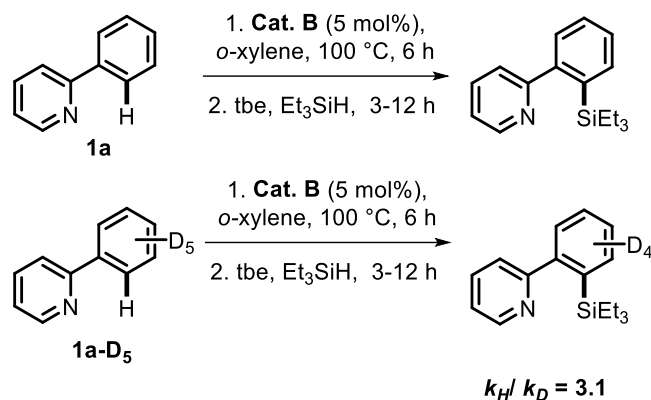

In glove box, to dry *o*-xylene (2 mL) were added substrate **1a** (77.6 mg, 0.5 mmol, 1.0 equiv) or **1a-D<sub>5</sub>** (80.1 mg, 0.5 mmol, 1.0 equiv) and **Cat. B** (16.3 mg, 5 mol%) in a 10 mL oven-dried Schlenk tube. The system reacted at 100 °C outside of glove box for 6 h. After that, the mixture was cooled to room temperature, then tbe (193.3 μL, 1.5 mmol, 3.0 equiv) and Et<sub>3</sub>SiH (159.7 μL, 1.0 mmol, 2.0 equiv) were added under argon atmosphere. The reaction system was stirred at 100 °C and quenched after reacting for 3 h, 6 h, 9 h and 12 h respectively. Yield was determined by GC-MS using dodecane as internal standard.

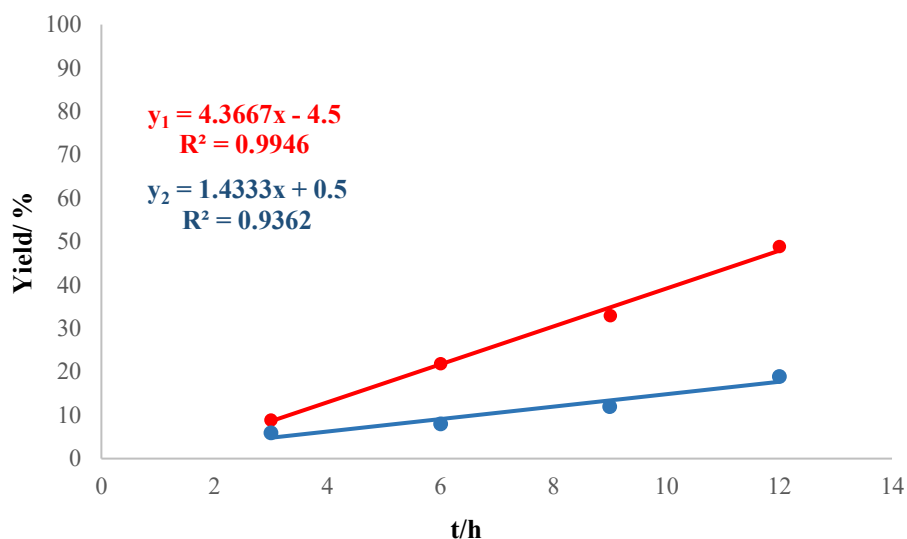

KIE from parallel reactions of **1a/1a-D<sub>5</sub>** was determined to  $k_H/k_D = 4.4/ 1.4 = 3.1$

## 6.5. KIE determined from intermolecular competition

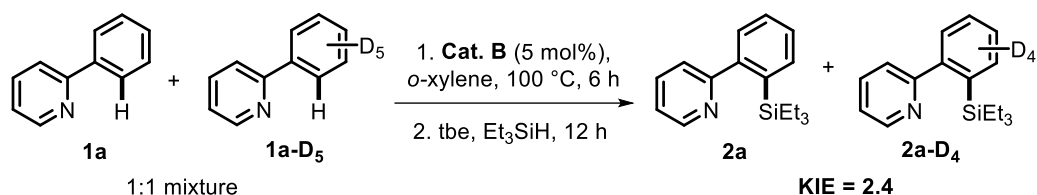

In glove box, to dry *o*-xylene (4 mL) were added substrate **1a** (77.6 mg, 0.5 mmol) and **1a-D5** (80.1 mg, 0.5 mmol) and **Cat. B** (32.5 mg) in a 25 mL oven-dried Schlenk tube. The system reacted at 100 °C outside of glove box for 6 h. After that, the mixture cooled to room temperature, then tbe (386.6  $\mu$ L, 3 mmol) and Et<sub>3</sub>SiH (319.4  $\mu$ L, 2 mmol) were added under argon atmosphere. After the reaction system was stirred at 100 °C for 12 h, the resulting solution was concentrated *in vacuo* and purified by silica gel column chromatography to give the mixed products of **2a** and **2a-D4** in a total yield of 33%, the ratio was determined by <sup>1</sup>H NMR spectrum.

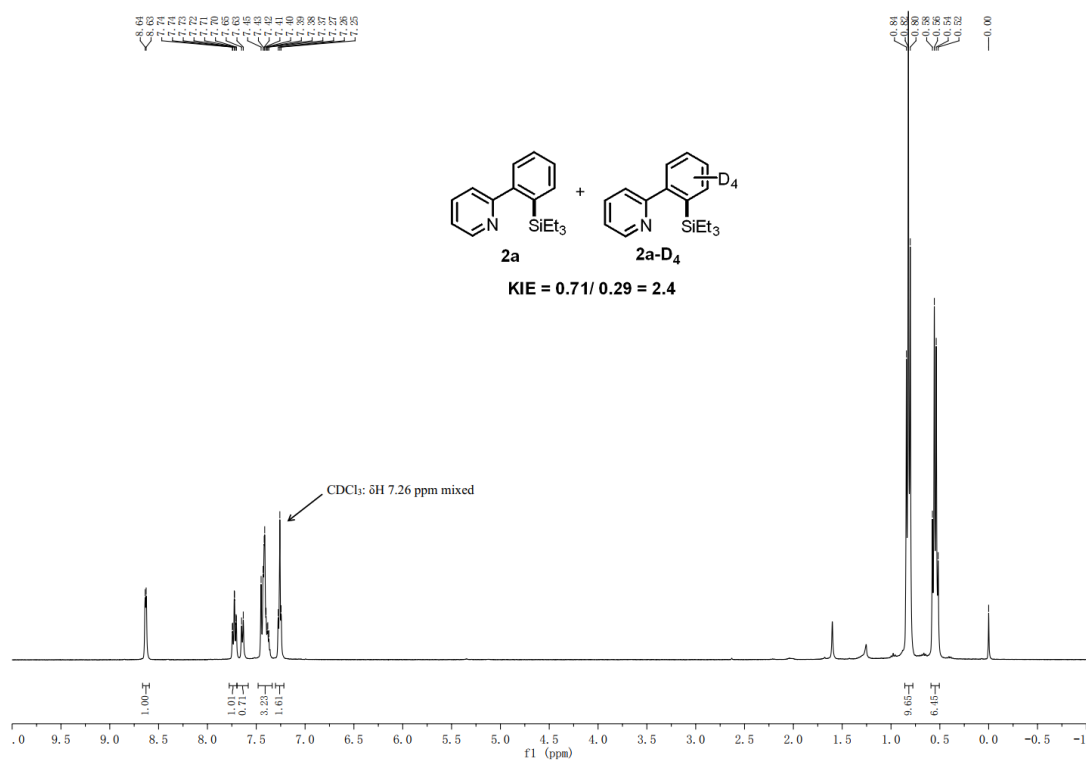

KIE from intermolecular competition of **1a/1a-D5** was determined to 0.71/ 0.29 = 2.4

## **7. DFT calculations**

### **7.1. Computational methods:**

The DFT optimization calculations were carried out at the  $\omega$ B97XD functional<sup>12</sup> theory level by Gaussian 09 programs.<sup>13</sup> The Pople's basis set 6-311G(d,p) was applied for the C, H, N, Cl and Si atoms, while the basis set LANL2TZ(f) with pseudopotential considered was used to simulate the Ir atom. The single point energy calculations were taken by using Dunning's correlation consistent basis sets Def2-TZVP for C, H, N, Cl and Si atoms, while Def2-QZVP for Ir atom to obtain more accurate energies given that TZVP and QZVP behave well in basis set superposition error (BSSE).<sup>14</sup> The SMD solvation model<sup>15</sup> was used to evaluate the solvation effect of *o*-xylene, and the temperatures were set to 393.15 K according to the experimental conditions during all the calculations. To ensure that the optimized catalyst, reactants, intermediates, and products had no imaginary frequencies while the transition states have only one imaginary frequency, vibrational frequency analyses were carried out. And the intrinsic reaction coordinate (IRC)<sup>16,17</sup> analyses were employed to confirm the transition states were connect the reactants and products. The Gibbs free energies were obtained by the addition of thermal correction of free energy and single point energy.

### **7.2. Cartesian Coordinates and energies**

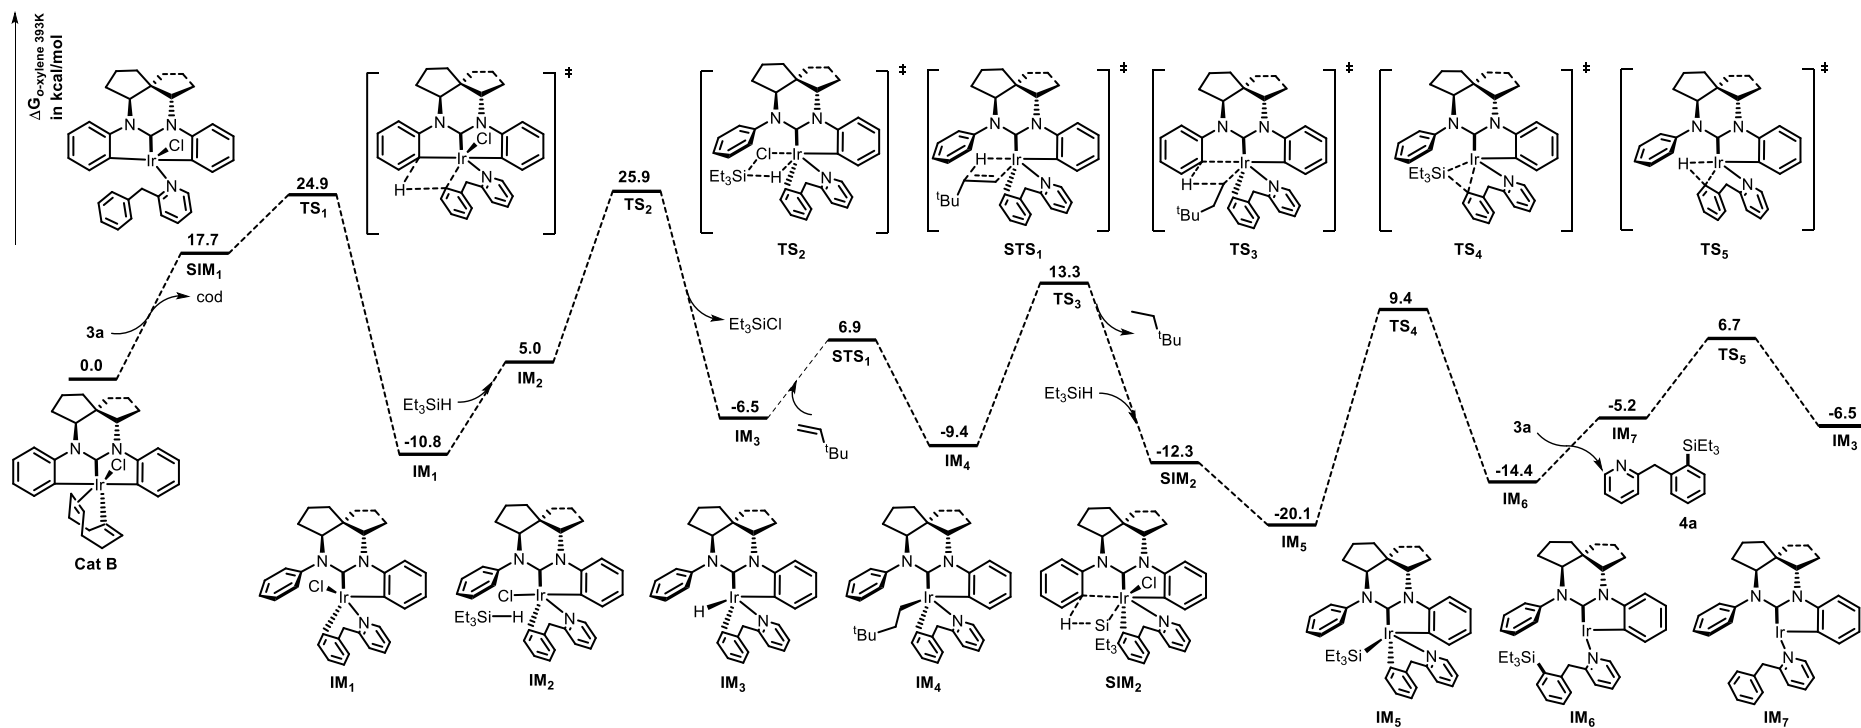

**Figure S1.** Complete energy profiles for the Ir-catalyzed silylation of 2-benzylpyridine **3a** at 120 °C.

(**SIM1**, **STS1**, **SIM2** were omitted in manuscript due to the limited page space)

**Cat. B**

Sum of Thermal Correction to Free Energies and

Electronic Energy = -1837.472989

Electronic Energy (EE) = -1837.972370

|    |            |             |             |
|----|------------|-------------|-------------|
| C  | 0.84151400 | -2.18719200 | -0.50097900 |
| C  | 0.54801500 | -2.01814600 | -0.62696300 |
| C  | 1.24653300 | -3.10414800 | -1.14522300 |
| C  | 0.62193500 | -4.31039900 | -1.45832400 |
| C  | 0.74411300 | -4.45268100 | -1.27823100 |
| C  | 1.49035600 | -3.37720700 | -0.80960800 |
| H  | 2.30803000 | -3.01932500 | -1.34202400 |
| H  | 1.20852000 | -5.13231600 | -1.85479000 |
| H  | 1.24042000 | -5.38569300 | -1.52028700 |
| H  | 2.56406600 | -3.47520100 | -0.71064200 |
| N  | 1.56363900 | -1.01872900 | -0.12177300 |
| C  | 0.83417800 | 0.10246700  | -0.16866500 |
| Ir | 1.15531700 | -0.03250700 | -0.17321800 |
| N  | 1.40907600 | 1.30369300  | -0.11378900 |
| C  | 0.51840600 | 2.40443500  | -0.24009400 |
| C  | 0.97835100 | 3.71047800  | -0.35087800 |
| C  | 0.84552100 | 2.06785800  | -0.27396300 |
| C  | 0.05702300 | 4.74156500  | -0.49734500 |
| H  | 2.03737200 | 3.93829100  | -0.34558500 |
| C  | 1.73101900 | 3.12856300  | -0.43719500 |
| C  | 1.29646800 | 4.44896400  | -0.54289700 |
| H  | 0.40484100 | 5.76446500  | -0.58700600 |
| H  | 2.79671800 | 2.94140700  | -0.48973000 |
| H  | 2.02232100 | 5.24528800  | -0.66882300 |
| C  | 2.85311100 | 1.45329400  | -0.10126300 |
| H  | 3.08650900 | 2.36675200  | 0.45095100  |
| C  | 3.00082800 | -1.07846800 | 0.17811400  |
| C  | 3.52265100 | 0.29865800  | 0.63472700  |
| C  | 4.98890800 | 0.47108000  | 0.21038900  |
| C  | 3.50878200 | 1.48326000  | -1.49046800 |
| H  | 2.94694900 | 0.82932900  | -2.16195900 |
| H  | 3.48747400 | 2.48237100  | -1.92727600 |
| C  | 4.94099000 | 0.94853200  | -1.25922500 |
| H  | 5.69536100 | 1.71572900  | -1.44131100 |
| H  | 5.15532400 | 0.12766400  | -1.94608800 |
| H  | 5.44824600 | 1.23470500  | 0.84607600  |
| H  | 5.57134900 | -0.44458900 | 0.33654100  |
| H  | 3.51259500 | -1.41428100 | -0.72797700 |
| C  | 3.27764400 | -2.02018100 | 1.38333200  |
| H  | 4.03103200 | -2.76796300 | 1.12904400  |

|    |            |             |             |
|----|------------|-------------|-------------|
| H  | 2.36798200 | -2.56585400 | 1.63693800  |
| C  | 3.73007300 | -1.12523900 | 2.55497900  |
| H  | 3.29868200 | -1.44313300 | 3.50566000  |
| H  | 4.81737300 | -1.16130400 | 2.66445000  |
| C  | 3.29905600 | 0.28177400  | 2.14732400  |
| H  | 3.85387800 | 1.07500000  | 2.65410400  |
| H  | 2.23427100 | 0.43266800  | 2.36232300  |
| Cl | 1.38851600 | 0.17741900  | -2.58681100 |
| C  | 3.21303100 | -0.89165500 | -0.08915400 |
| H  | 3.42870800 | -1.24258000 | -1.09343800 |
| C  | 3.30449200 | 0.48064400  | 0.12520800  |
| H  | 3.58264700 | 1.08251500  | -0.73211000 |
| C  | 3.58911500 | 1.06663700  | 1.50253900  |
| H  | 4.16044400 | 1.98907000  | 1.38185100  |
| H  | 4.24039700 | 0.37550200  | 2.04577800  |
| C  | 3.35835600 | -1.91463900 | 1.01770100  |
| H  | 4.39079400 | -1.89171400 | 1.38740500  |
| H  | 3.20748700 | -2.90589100 | 0.59315500  |
| C  | 2.37035700 | -1.71154900 | 2.17726600  |
| H  | 2.86728400 | -1.23176700 | 3.02637000  |
| H  | 2.02970300 | -2.68587700 | 2.53162900  |
| C  | 2.32340500 | 1.36270400  | 2.32309200  |
| H  | 2.51142200 | 1.21321200  | 3.39363500  |
| H  | 2.04811900 | 2.41013500  | 2.19602300  |
| C  | 1.14574500 | -0.88166800 | 1.81092400  |
| H  | 0.19516100 | -1.38249900 | 1.96673200  |
| C  | 1.12989900 | 0.52750400  | 1.91368200  |
| H  | 0.17336800 | 0.98656800  | 2.15007300  |

**3a**

Sum of Thermal Correction to Free Energies and

Electronic Energy = -518.524460

Electronic Energy (EE) = -518.670533

|   |            |             |             |
|---|------------|-------------|-------------|
| C | 2.87966300 | 1.22726500  | -0.02048500 |
| C | 3.48987800 | 0.31108000  | -0.86445700 |
| C | 2.94181700 | -0.96208900 | -0.95303800 |
| C | 1.81652100 | -1.25799900 | -0.20084400 |
| C | 1.27207800 | -0.27175400 | 0.62171700  |
| N | 1.79881200 | 0.95229600  | 0.71018100  |
| H | 3.38473600 | -1.71192300 | -1.59910700 |
| H | 3.27746200 | 2.23339800  | 0.07878400  |
| H | 4.36864000 | 0.58936600  | -1.43318200 |
| H | 1.35648600 | -2.23848400 | -0.24758400 |
| C | 0.01930100 | -0.53186800 | 1.42596700  |

|   |             |             |             |   |             |             |             |
|---|-------------|-------------|-------------|---|-------------|-------------|-------------|
| H | -0.00981100 | -1.57852600 | 1.73863600  | H | 0.00538200  | 0.00092900  | -2.51280500 |
| H | 0.06099000  | 0.08675700  | 2.32532600  | C | -0.34341700 | 1.76925100  | -0.44935600 |
| C | -1.23204800 | -0.20473500 | 0.63592500  | C | -0.86038800 | 1.92507100  | 0.98643600  |
| C | -2.09885000 | -1.21095900 | 0.21620600  | H | -1.07316900 | 2.20257700  | -1.14386900 |
| C | -1.52367200 | 1.11783100  | 0.29681000  | H | 0.57296200  | 2.35746000  | -0.58378700 |
| C | -3.23751300 | -0.90616800 | -0.52314700 | H | -1.02261300 | 2.97796900  | 1.23754600  |
| H | -1.88472100 | -2.24376700 | 0.47350400  | H | -1.81493900 | 1.40817600  | 1.12321100  |
| C | -2.65890400 | 1.42434200  | -0.44057100 | H | -0.15995500 | 1.51945000  | 1.72174000  |
| H | -0.84577300 | 1.90514900  | 0.61004000  | C | 1.70866200  | -0.58204300 | -0.44833200 |
| C | -3.52073900 | 0.41246300  | -0.85327600 | C | 2.09492400  | -0.22599500 | 0.99312700  |
| H | -3.90331900 | -1.70173100 | -0.83972500 | H | 2.44847200  | -0.15380700 | -1.13530600 |
| H | -2.87338600 | 2.45674300  | -0.69449900 | H | 1.76723700  | -1.66767300 | -0.59551000 |
| H | -4.40818600 | 0.65249000  | -1.42830200 | H | 3.09024600  | -0.60678700 | 1.24245600  |

### cod

Sum of Thermal Correction to Free Energies and

Electronic Energy = -311.916311

Electronic Energy (EE) = -312.052739

|   |             |             |             |
|---|-------------|-------------|-------------|
| C | -1.19041100 | -1.23272400 | -0.50709200 |
| H | -1.78182300 | -1.82376800 | -1.20476100 |
| C | 0.03454700  | -1.68426400 | -0.24254500 |
| H | 0.33937900  | -2.58891400 | -0.76526200 |
| C | 1.08205100  | -1.09286600 | 0.66809800  |
| H | 1.77360100  | -1.88982700 | 0.95762800  |
| H | 0.64199800  | -0.73299400 | 1.59792800  |
| C | -1.91412000 | -0.01684800 | 0.00582000  |
| H | -2.69128700 | -0.34453500 | 0.70912000  |
| H | -2.45849700 | 0.41890700  | -0.84081900 |
| C | -1.08203800 | 1.09283900  | 0.66818100  |
| H | -0.64196600 | 0.73294300  | 1.59799400  |
| H | -1.77358800 | 1.88978400  | 0.95774700  |
| C | 1.91412000  | 0.01683600  | 0.00575100  |
| H | 2.69132800  | 0.34448300  | 0.70902400  |
| H | 2.45844700  | -0.41888500 | -0.84093800 |
| C | -0.03455000 | 1.68427900  | -0.24245700 |
| H | -0.33938300 | 2.58896700  | -0.76510500 |
| C | 1.19040000  | 1.23274800  | -0.50706400 |
| H | 1.78179700  | 1.82383500  | -1.20470800 |

### Et<sub>3</sub>SiH

Sum of Thermal Correction to Free Energies and

Electronic Energy = -527.666358

Electronic Energy (EE) = -527.822722

|    |            |            |             |
|----|------------|------------|-------------|
| Si | 0.00324900 | 0.00015100 | -1.01683800 |
|----|------------|------------|-------------|

|   |             |             |             |
|---|-------------|-------------|-------------|
| H | 0.00538200  | 0.00092900  | -2.51280500 |
| C | -0.34341700 | 1.76925100  | -0.44935600 |
| C | -0.86038800 | 1.92507100  | 0.98643600  |
| H | -1.07316900 | 2.20257700  | -1.14386900 |
| H | 0.57296200  | 2.35746000  | -0.58378700 |
| H | -1.02261300 | 2.97796900  | 1.23754600  |
| H | -1.81493900 | 1.40817600  | 1.12321100  |
| H | -0.15995500 | 1.51945000  | 1.72174000  |
| C | 1.70866200  | -0.58204300 | -0.44833200 |
| C | 2.09492400  | -0.22599500 | 0.99312700  |
| H | 2.44847200  | -0.15380700 | -1.13530600 |
| H | 1.76723700  | -1.66767300 | -0.59551000 |
| H | 3.09024600  | -0.60678700 | 1.24245600  |
| H | 2.11650500  | 0.85768800  | 1.14262800  |
| H | 1.39459000  | -0.64352800 | 1.72187300  |
| C | -1.35718400 | -1.18468800 | -0.45415900 |
| C | -1.24751600 | -1.70215300 | 0.98558700  |
| H | -1.35842200 | -2.03706900 | -1.14418700 |
| H | -2.32438500 | -0.68789000 | -0.60127100 |
| H | -2.07967900 | -2.36892700 | 1.23209800  |
| H | -0.32338100 | -2.26870500 | 1.13473400  |
| H | -1.25481900 | -0.88863800 | 1.71636100  |

### Et<sub>3</sub>SiCl

Sum of Thermal Correction to Free Energies and

Electronic Energy = -987.357103

Electronic Energy (EE) = -987.502965

|    |             |             |             |
|----|-------------|-------------|-------------|
| Si | -0.36770100 | -0.00061800 | 0.00016300  |
| C  | 0.14873700  | -1.33706500 | -1.21144400 |
| C  | 1.59201100  | -1.22373000 | -1.72254300 |
| H  | -0.54122500 | -1.30154000 | -2.06196900 |
| H  | -0.01117000 | -2.31244300 | -0.73697400 |
| H  | 1.82730200  | -2.04424800 | -2.40627100 |
| H  | 1.74816900  | -0.28995300 | -2.27018600 |
| H  | 2.32316000  | -1.25733200 | -0.91019300 |
| C  | 0.14797600  | -0.38168100 | 1.76353500  |
| C  | 1.59184700  | -0.87918900 | 1.92120600  |
| H  | -0.54105200 | -1.13706300 | 2.15769000  |
| H  | -0.01340900 | 0.51649300  | 2.37127700  |
| H  | 1.82723000  | -1.05997200 | 2.97383100  |
| H  | 1.74890100  | -1.82075500 | 1.38729000  |
| H  | 2.32213800  | -0.15839500 | 1.54338500  |
| C  | 0.14787900  | 1.71744700  | -0.55049600 |
| C  | 1.59140000  | 2.10454800  | -0.19952900 |

|    |             |            |             |
|----|-------------|------------|-------------|
| H  | -0.54143400 | 2.43533900 | -0.09198000 |
| H  | -0.01476300 | 1.79585700 | -1.63192100 |
| H  | 1.82350800  | 3.10883900 | -0.56506900 |
| H  | 1.75070200  | 2.10846800 | 0.88254600  |
| H  | 2.32274500  | 1.42104400 | -0.63937300 |
| Cl | -2.48247600 | 0.00013800 | -0.00051400 |

### 3,3-dimethyl-1-butene

Sum of Thermal Correction to Free Energies and  
Electronic Energy = -235.744223

Electronic Energy (EE) = -235.865700

|   |             |             |             |
|---|-------------|-------------|-------------|
| C | -1.11460200 | -0.46294000 | 1.25252000  |
| C | -0.35226500 | 0.00197600  | 0.00000000  |
| H | -1.19956700 | -1.55397000 | 1.28142200  |
| H | -0.60473600 | -0.14041200 | 2.16516700  |
| H | -2.12772300 | -0.04800500 | 1.26278100  |
| C | -0.25412200 | 1.52853000  | -0.00029400 |
| C | -1.11457700 | -0.46343100 | -1.25235100 |
| H | 0.27171000  | 1.89635600  | -0.88648500 |
| H | -1.25553100 | 1.96930600  | -0.00035900 |
| H | 0.27174600  | 1.89669300  | 0.88573500  |
| H | -2.12768300 | -0.04846500 | -1.26282100 |
| H | -0.60466700 | -0.14129900 | -2.16511300 |
| H | -1.19958100 | -1.55447000 | -1.28080400 |
| C | 1.00513200  | -0.66639100 | 0.00013700  |
| C | 2.19554800  | -0.07948700 | 0.00001700  |
| H | 0.96399900  | -1.75638400 | 0.00035700  |
| H | 3.10717500  | -0.66840000 | 0.00013300  |
| H | 2.31417500  | 0.99950600  | -0.00019100 |

### 3,3-dimethyl-1-butane

Sum of Thermal Correction to Free Energies and  
Electronic Energy = -236.961372

Electronic Energy (EE) = -237.104929

|   |            |             |             |
|---|------------|-------------|-------------|
| H | 0.85460000 | 1.48659400  | -0.87719400 |
| C | 1.61617200 | 0.97755700  | -0.00003800 |
| C | 0.43373700 | 0.00079100  | -0.00000100 |
| H | 1.59551300 | 1.62243200  | 0.88489600  |
| H | 1.59557100 | 1.62228900  | -0.88507700 |
| H | 2.56990400 | 0.43974500  | 0.00003600  |
| C | 0.51790300 | -0.88140500 | -1.25142000 |
| C | 0.51785300 | -0.88124600 | 1.25153300  |
| H | 0.26552200 | -1.64450400 | -1.26428100 |
| H | 1.48068700 | -1.40113700 | -1.29337000 |

|   |            |             |             |
|---|------------|-------------|-------------|
| H | 0.42133300 | -0.28323100 | -2.16392400 |
| H | 1.48063800 | -1.40096800 | 1.29359100  |
| H | 0.26556800 | -1.64434900 | 1.26445200  |
| H | 0.42123700 | -0.28296000 | 2.16396000  |
| C | 0.86988700 | 0.82763900  | -0.00007700 |
| C | 2.17549200 | 0.03685600  | -0.00000600 |
| H | 0.85460200 | 1.48675100  | 0.87692200  |
| H | 3.03124600 | 0.71778400  | -0.00006700 |
| H | 2.26753100 | -0.59972200 | 0.88443100  |
| H | 2.26753300 | -0.59988200 | -0.88432700 |

### SIM<sub>1</sub>

Sum of Thermal Correction to Free Energies and  
Electronic Energy = -2044.052954

Electronic Energy (EE) = -2044.558830

|    |             |             |             |
|----|-------------|-------------|-------------|
| C  | 1.01507700  | -2.27838000 | 0.56587100  |
| C  | -0.37337000 | -2.12250800 | 0.34915900  |
| C  | -1.15013600 | -3.26127300 | 0.55088300  |
| C  | -0.60742100 | -4.47235000 | 0.98777500  |
| C  | 0.75078000  | -4.56511100 | 1.24610700  |
| C  | 1.57385200  | -3.45996600 | 1.03394400  |
| H  | -2.21978800 | -3.21064600 | 0.35857500  |
| H  | -1.24773300 | -5.33748200 | 1.12873400  |
| H  | 1.18244400  | -5.49362900 | 1.60327400  |
| H  | 2.63730900  | -3.54342400 | 1.22574700  |
| N  | 1.82635100  | -1.12096800 | 0.30573600  |
| C  | 1.12644900  | -0.00204800 | 0.06998700  |
| Ir | -0.80104900 | -0.12774000 | -0.15087200 |
| N  | 1.71491600  | 1.18293500  | -0.11183600 |
| C  | 0.83159800  | 2.25127700  | -0.47289800 |
| C  | 1.28386800  | 3.55211000  | -0.64471200 |
| C  | -0.52213500 | 1.88269200  | -0.62819400 |
| C  | 0.37831900  | 4.53510700  | -1.04169400 |
| H  | 2.32044900  | 3.82197900  | -0.47700200 |
| C  | -1.38328200 | 2.89369100  | -1.04586200 |
| C  | -0.95053200 | 4.20373600  | -1.25821300 |
| H  | 0.72260800  | 5.55374000  | -1.18431800 |
| H  | -2.43496900 | 2.65992400  | -1.19485500 |
| H  | -1.65352500 | 4.96491900  | -1.58237100 |
| C  | 3.15232200  | 1.32177500  | 0.00849300  |
| H  | 3.46722500  | 2.14861600  | -0.63168900 |
| C  | 3.28122300  | -1.23921900 | 0.09760900  |
| C  | 3.87314500  | 0.06929600  | -0.48293200 |
| C  | 5.29983800  | 0.28740900  | 0.05346000  |

|    |             |             |             |                                                         |             |             |             |
|----|-------------|-------------|-------------|---------------------------------------------------------|-------------|-------------|-------------|
| C  | 3.67216800  | 1.53238600  | 1.43410900  | <b>TS<sub>1</sub></b>                                   |             |             |             |
| H  | 3.11979200  | 0.87224700  | 2.10744500  | Sum of Thermal Correction to Free Energies and          |             |             |             |
| H  | 3.52643600  | 2.55575300  | 1.78467200  | Electronic Energy = -2044.041396                        |             |             |             |
| C  | 5.15250900  | 1.10860700  | 1.36098700  | Electronic Energy (EE) = -2044.543664                   |             |             |             |
| H  | 5.81058500  | 1.97946900  | 1.33760100  | Value of imaginary frequency = -595.26 cm <sup>-1</sup> |             |             |             |
| H  | 5.43414800  | 0.52544400  | 2.23958100  | Ir                                                      | 0.69331300  | 0.23592900  | -0.23173200 |
| H  | 5.87378000  | 0.85157900  | -0.68725900 | N                                                       | -1.99248800 | 0.96436700  | 0.41725000  |
| H  | 5.82787500  | -0.65588800 | 0.21126700  | N                                                       | -1.71109400 | -1.26736900 | -0.22973500 |
| H  | 3.73517400  | -1.47561100 | 1.06456600  | C                                                       | -1.21105900 | -0.05841400 | 0.04479100  |
| C  | 3.61668200  | -2.32027200 | -0.97252100 | C                                                       | -3.46451600 | 0.96091600  | 0.31186900  |
| H  | 4.26931900  | -3.09355200 | -0.56287800 | C                                                       | -4.01001400 | -0.39434900 | -0.21253500 |
| H  | 2.69642200  | -2.81222200 | -1.28661700 | C                                                       | -3.09256500 | -1.57696100 | 0.08501400  |
| C  | 4.25838900  | -1.58888100 | -2.16530600 | C                                                       | -3.96310400 | 2.01549300  | -0.72079900 |
| H  | 3.95240900  | -2.02182000 | -3.11900800 | C                                                       | -4.81087900 | 1.25799900  | -1.75179800 |
| H  | 5.35006200  | -1.64555600 | -2.11323300 | C                                                       | -4.24051600 | -0.15354500 | -1.70579600 |
| C  | 3.80200300  | -0.14421300 | -1.99539000 | C                                                       | -5.27674300 | -0.78933300 | 0.56218200  |
| H  | 4.41358600  | 0.57974500  | -2.53995400 | C                                                       | -4.77446300 | -1.45012400 | 1.86240700  |
| H  | 2.76547600  | -0.03312200 | -2.33295600 | C                                                       | -3.33872700 | -1.93973400 | 1.56163500  |
| Cl | -0.28294000 | -0.68319300 | -2.40826000 | C                                                       | -1.28801000 | 2.18528600  | 0.67064500  |
| C  | -3.42471300 | -0.24165200 | -1.84591200 | C                                                       | 0.09153100  | 2.17793100  | 0.38455300  |
| C  | -4.77158000 | -0.41055500 | -2.11453200 | C                                                       | 0.78381700  | 3.37175600  | 0.54697300  |
| C  | -5.63762100 | -0.67653800 | -1.06530900 | C                                                       | 0.14868000  | 4.52868200  | 0.99886600  |
| C  | -5.12195500 | -0.74995900 | 0.21973700  | C                                                       | -1.19839200 | 4.49292100  | 1.32309300  |
| C  | -3.76133700 | -0.57002400 | 0.41634600  | C                                                       | -1.92673500 | 3.31716700  | 1.15845200  |
| N  | -2.92123000 | -0.32851800 | -0.60790000 | C                                                       | -0.77262300 | -2.21541600 | -0.74397900 |
| H  | -6.69799400 | -0.81397900 | -1.24195600 | C                                                       | -1.12286800 | -3.52865800 | -1.02269600 |
| H  | -2.71002600 | -0.03587700 | -2.63125700 | C                                                       | -0.14830000 | -4.39737400 | -1.50990100 |
| H  | -5.12381500 | -0.32959800 | -3.13466100 | C                                                       | 1.14991600  | -3.95086400 | -1.69901900 |
| H  | -5.76182400 | -0.94053600 | 1.07249600  | C                                                       | 1.48280900  | -2.63010900 | -1.39462300 |
| C  | -3.10390000 | -0.61050000 | 1.76057900  | C                                                       | 0.54007000  | -1.73041200 | -0.91404300 |
| H  | -3.84086400 | -0.43572000 | 2.54851700  | H                                                       | -3.85439400 | 1.16548700  | 1.31235500  |
| H  | -2.67711400 | -1.60373400 | 1.92253600  | H                                                       | -3.41144300 | -2.39448400 | -0.56244800 |
| C  | -2.00617100 | 0.43171100  | 1.84140800  | H                                                       | -0.41392400 | -5.42486500 | -1.73263900 |
| C  | -0.70517500 | 0.09186200  | 2.25653200  | H                                                       | 0.71046500  | 5.45034500  | 1.10698700  |
| C  | -2.39158600 | 1.80736200  | 1.88374400  | H                                                       | -1.69635500 | 5.37957500  | 1.69915000  |
| C  | 0.17374800  | 1.11284500  | 2.72175200  | H                                                       | -2.98128100 | 3.30570900  | 1.40391100  |
| H  | -0.47150700 | -0.93772700 | 2.49329700  | H                                                       | -2.12958600 | -3.89672300 | -0.86451700 |
| C  | -1.52530700 | 2.76865000  | 2.30818400  | H                                                       | -4.89474400 | -0.91142400 | -2.14424500 |
| C  | -0.22069600 | 2.41725400  | 2.73335900  | H                                                       | -3.28112100 | -0.18848800 | -2.23464300 |
| H  | 1.15083100  | 0.82661100  | 3.08992600  | H                                                       | -4.74941000 | 1.71374700  | -2.74145100 |
| H  | -1.83162600 | 3.80780100  | 2.32364500  | H                                                       | -5.86510700 | 1.24765500  | -1.45762500 |
| H  | 0.45337700  | 3.18946500  | 3.08575400  | H                                                       | -4.51531500 | 2.82463500  | -0.24090700 |
| H  | -3.39833800 | 2.07300600  | 1.57864500  | H                                                       | -3.09752500 | 2.46254800  | -1.21242500 |
|    |             |             |             | H                                                       | -5.93823700 | 0.05961700  | 0.74950200  |



|    |             |             |             |    |             |             |             |
|----|-------------|-------------|-------------|----|-------------|-------------|-------------|
| H  | -5.83969600 | -1.51159300 | -0.03782900 | H  | -0.09260700 | -4.66327800 | 1.84680400  |
| H  | -5.43272900 | -2.26452900 | 2.16925600  | H  | -1.20784200 | -5.39169600 | -0.24419200 |
| H  | -4.76182300 | -0.72937300 | 2.68298600  | H  | -0.91077600 | -4.07350600 | -2.32394700 |
| H  | -2.61167400 | -1.41707900 | 2.18804600  | H  | 0.51658500  | -2.04316200 | -2.30959500 |
| H  | -3.20406000 | -3.00853500 | 1.73632900  | N  | 1.82300000  | -1.04886900 | -0.20375900 |
| H  | 1.84300000  | 3.40586400  | 0.31004100  | C  | 1.16887000  | 0.12120500  | -0.18461100 |
| H  | 2.51190900  | -2.30655000 | -1.52213900 | Ir | -0.77125300 | 0.26364100  | -0.40289900 |
| H  | 1.90896500  | -4.63098400 | -2.07134600 | N  | 1.85198200  | 1.26386600  | 0.00736700  |
| H  | 0.77641200  | 0.70967600  | 1.27716700  | C  | 1.02504500  | 2.40207700  | 0.15656700  |
| C  | 5.47739100  | 0.64832500  | -1.55835900 | C  | 1.50826400  | 3.66985400  | 0.44161800  |
| C  | 5.11621800  | 0.81073900  | -0.23269700 | C  | -0.35502900 | 2.13365600  | 0.05550100  |
| C  | 3.77856900  | 0.72533400  | 0.13807300  | C  | 0.60416600  | 4.71114300  | 0.64093200  |
| C  | 3.17100600  | 0.32063600  | -2.05297400 | H  | 2.57245900  | 3.85866900  | 0.52157200  |
| C  | 4.47995000  | 0.39551100  | -2.48697400 | C  | -1.23287400 | 3.18595600  | 0.29288900  |
| H  | 6.51671500  | 0.71273000  | -1.85889700 | C  | -0.75889900 | 4.46707800  | 0.57605800  |
| H  | 5.86261600  | 1.00057600  | 0.52841700  | H  | 0.97383300  | 5.70584400  | 0.86267100  |
| H  | 2.36310600  | 0.12443400  | -2.74397200 | H  | -2.30223600 | 3.01015500  | 0.27543400  |
| H  | 4.69991700  | 0.25210100  | -3.53677000 | H  | -1.46393400 | 5.27194600  | 0.75436800  |
| C  | 2.63133700  | -0.33242200 | 2.09706700  | C  | 3.27774900  | 1.29636000  | 0.26262600  |
| C  | 1.39219800  | -0.69508500 | 1.54774900  | H  | 3.67777900  | 2.20603300  | -0.19427900 |
| C  | 3.17083900  | -1.06436500 | 3.15320400  | C  | 3.28083100  | -1.22029400 | -0.06972600 |
| C  | 0.68610900  | -1.73910000 | 2.15435800  | C  | 3.99105100  | 0.10873600  | -0.38324100 |
| C  | 2.47866100  | -2.12788500 | 3.71191600  | C  | 5.35540200  | 0.16721400  | 0.32142700  |
| H  | 4.14008900  | -0.77971600 | 3.55109000  | C  | 3.65760000  | 1.23434300  | 1.75172200  |
| C  | 1.22255100  | -2.45261500 | 3.21595200  | H  | 2.92536400  | 0.61297000  | 2.27472300  |
| H  | -0.29091100 | -2.01936100 | 1.78371400  | H  | 3.63339900  | 2.21969800  | 2.21917500  |
| H  | 2.90773300  | -2.68537600 | 4.53683800  | C  | 5.05888200  | 0.58175800  | 1.77837200  |
| H  | 0.65680200  | -3.26915400 | 3.65120900  | H  | 5.82124700  | 1.26712600  | 2.15256500  |
| N  | 2.81328800  | 0.48790400  | -0.76839400 | H  | 5.06293500  | -0.28529800 | 2.44236000  |
| Cl | 0.04464800  | 0.95206000  | -2.48401400 | H  | 5.96300100  | 0.93135900  | -0.17305200 |
| C  | 3.36843100  | 0.87686800  | 1.57287100  | H  | 5.90739800  | -0.77279500 | 0.25135000  |
| H  | 4.25301900  | 1.06648700  | 2.18131700  | H  | 3.49902300  | -1.58407800 | 0.93928000  |
| H  | 2.72308400  | 1.75836300  | 1.65844900  | C  | 3.80878600  | -2.15512800 | -1.15847700 |
|    |             |             |             | H  | 4.83247200  | -2.43824000 | -0.89821600 |
|    |             |             |             | H  | 3.23188600  | -3.07705700 | -1.24708700 |
|    |             |             |             | C  | 3.78561600  | -1.28929400 | -2.42344800 |
|    |             |             |             | H  | 2.80380100  | -1.34816400 | -2.89887000 |
|    |             |             |             | H  | 4.52080800  | -1.62136600 | -3.15824200 |
|    |             |             |             | C  | 4.04753000  | 0.15068800  | -1.92803100 |
|    |             |             |             | H  | 5.01976000  | 0.52552800  | -2.25679400 |
|    |             |             |             | H  | 3.28885500  | 0.83422000  | -2.31742500 |
|    |             |             |             | Cl | -0.56894200 | 0.54676000  | -2.88342300 |
|    |             |             |             | C  | -3.50221400 | 1.28781600  | -1.38689300 |
|    |             |             |             | C  | -4.87161400 | 1.36188400  | -1.55046100 |

### IM<sub>1</sub>

Sum of Thermal Correction to Free Energies and

Electronic Energy = -2044.098337

Electronic Energy (EE) = -2044.602813

|   |             |             |             |
|---|-------------|-------------|-------------|
| C | 1.00811000  | -2.23077300 | -0.23122700 |
| C | 0.84363500  | -2.96535700 | 0.93874700  |
| C | 0.04923400  | -4.10260500 | 0.93022500  |
| C | -0.58228900 | -4.50624100 | -0.24258600 |
| C | -0.41794000 | -3.76829700 | -1.40810800 |
| C | 0.38269100  | -2.62993500 | -1.40871800 |

|   |             |             |             |    |             |             |             |
|---|-------------|-------------|-------------|----|-------------|-------------|-------------|
| C | -5.66601100 | 0.40878100  | -0.92953000 | C  | -3.70218700 | -2.39880400 | -1.24279500 |
| C | -5.05693100 | -0.58584900 | -0.18235600 | H  | -2.80420100 | -2.63422100 | -0.66534500 |
| C | -3.67277800 | -0.60588400 | -0.05888000 | H  | -4.16135700 | -3.34530700 | -1.53455100 |
| N | -2.91403400 | 0.33802700  | -0.64430300 | C  | -4.63427200 | -1.50303700 | -0.42906300 |
| H | -6.74466500 | 0.43526100  | -1.03246900 | H  | -5.65584500 | -1.58359300 | -0.81490000 |
| H | -2.83389500 | 1.99347200  | -1.86279200 | H  | -4.66329600 | -1.76967000 | 0.63031100  |
| H | -5.29639200 | 2.15124000  | -2.15656800 | Ir | 0.79219500  | -0.24031200 | -0.03520800 |
| H | -5.64277300 | -1.35432100 | 0.30620500  | N  | -1.70679500 | 0.04460000  | -1.41380600 |
| C | -2.96025300 | -1.68401000 | 0.71463100  | N  | -2.12630100 | -0.07284200 | 0.82972700  |
| H | -3.69937800 | -2.38300500 | 1.10933200  | C  | -1.20590700 | -0.13503200 | -0.16055500 |
| H | -2.33785600 | -2.25602500 | 0.01400100  | C  | -0.73071500 | 0.08554500  | -2.44835700 |
| C | -2.10302000 | -1.13225700 | 1.83730900  | C  | 0.58496700  | -0.15872100 | -2.02135400 |
| C | -2.32858000 | -1.56170400 | 3.14268200  | C  | 1.56241600  | -0.25204800 | -3.01302200 |
| C | -1.07967400 | -0.21049600 | 1.53997500  | C  | 1.26444500  | -0.03668000 | -4.35659000 |
| C | -1.55061900 | -1.08926000 | 4.19264200  | C  | -0.03277700 | 0.27052500  | -4.73873300 |
| H | -3.12092700 | -2.27900500 | 3.33951900  | C  | -1.04333700 | 0.32003800  | -3.78294600 |
| C | -0.32566800 | 0.26551400  | 2.62202900  | C  | -1.94327900 | -0.69355900 | 2.10198400  |
| C | -0.54846600 | -0.16540700 | 3.92534900  | C  | -2.24219000 | 0.00949300  | 3.26497800  |
| H | -1.73280000 | -1.43134900 | 5.20563500  | C  | -2.11214800 | -0.60998100 | 4.49848400  |
| H | 0.45655700  | 0.99720500  | 2.44522200  | C  | -1.67843600 | -1.92874800 | 4.57800300  |
| H | 0.06026800  | 0.22717400  | 4.73406600  | C  | -1.39446200 | -2.62997800 | 3.41341300  |
| H | 1.30686900  | -2.61964500 | 1.85543500  | C  | -1.54273900 | -2.02142200 | 2.17514500  |

## IM<sub>2</sub>

Sum of Thermal Correction to Free Energies and

Electronic Energy = -2571.739532

Electronic Energy (EE) = -2572.430611

|   |             |             |             |   |             |             |             |
|---|-------------|-------------|-------------|---|-------------|-------------|-------------|
| C | -3.42897500 | 0.54520700  | 0.57219200  | H | 2.57967600  | -0.50814700 | -2.73915700 |
| H | -4.04538500 | 0.34541500  | 1.44833800  | H | -1.06051400 | -3.66019700 | 3.46130800  |
| C | -3.11904200 | -0.12706400 | -1.82026300 | H | -1.56458500 | -2.40680300 | 5.54436100  |
| C | -4.12343800 | -0.05940300 | -0.64222700 | H | -1.32573200 | -2.56877400 | 1.26730300  |
| C | -5.22622400 | 0.96915600  | -0.90893500 | C | 5.72427800  | -0.15860100 | -0.14502600 |
| C | -3.39008100 | 2.06220600  | 0.30283400  | C | 5.06291500  | -1.18849900 | 0.49647100  |
| H | -2.44192200 | 2.33028000  | -0.16571900 | C | 3.67002800  | -1.22123400 | 0.52571400  |
| H | -3.45836400 | 2.62563600  | 1.23444100  | C | 3.59674400  | 0.73304100  | -0.71017300 |
| C | -4.57112400 | 2.33971100  | -0.65501400 | C | 4.97088200  | 0.82808500  | -0.76527700 |
| H | -5.28365600 | 3.05343700  | -0.23815500 | H | 6.80748600  | -0.12691100 | -0.16522500 |
| H | -4.20290300 | 2.76966900  | -1.58970500 | H | 5.61416300  | -1.98059600 | 0.98736900  |
| H | -6.04111600 | 0.79723500  | -0.19762800 | H | 2.97234200  | 1.46881000  | -1.19858700 |
| H | -5.64748000 | 0.87032300  | -1.91336600 | H | 5.43067300  | 1.65653600  | -1.28808500 |
| H | -3.33237800 | 0.67217000  | -2.53041300 | C | 0.86391300  | -2.26249500 | -0.19508000 |
| C | -3.34568000 | -1.51842400 | -2.43885500 | C | 1.92249700  | -4.39364300 | 0.31868800  |
| H | -4.19940500 | -1.45802200 | -3.12290100 | C | -0.04884000 | -2.98792900 | -0.97470700 |
| H | -2.48792600 | -1.86863700 | -3.01436200 | C | 0.97590800  | -5.08912300 | -0.41984000 |

|                                                        |             |             |             |    |             |             |             |
|--------------------------------------------------------|-------------|-------------|-------------|----|-------------|-------------|-------------|
| H                                                      | 2.71508400  | -4.93985500 | 0.82271500  | C  | -5.34395600 | 0.93788100  | -0.99676500 |
| C                                                      | -0.01205700 | -4.37184600 | -1.08058600 | C  | -3.26267200 | 2.24649400  | -1.06882100 |
| H                                                      | -0.81511600 | -2.45559500 | -1.52304500 | H  | -2.44886600 | 1.94605500  | -1.72814200 |
| H                                                      | 1.02057500  | -6.17048500 | -0.48991100 | H  | -3.07896500 | 3.28028200  | -0.77020200 |
| H                                                      | -0.75243900 | -4.88438100 | -1.68696500 | C  | -4.62464300 | 2.05715100  | -1.77561000 |
| N                                                      | 2.94799800  | -0.25888000 | -0.07745600 | H  | -5.21527000 | 2.97485600  | -1.78488500 |
| Si                                                     | 0.74028500  | 2.98979100  | 0.44549100  | H  | -4.47051200 | 1.77026100  | -2.81822800 |
| C                                                      | 0.13181600  | 3.89617900  | -1.08642600 | H  | -6.02590100 | 1.36654300  | -0.25499500 |
| H                                                      | -0.89951600 | 3.58276600  | -1.28844700 | H  | -5.93779100 | 0.27882000  | -1.63635900 |
| H                                                      | 0.08087900  | 4.97055600  | -0.87014200 | H  | -3.76747400 | -0.58547500 | -2.23688000 |
| C                                                      | 2.47410100  | 3.50369700  | 0.93802300  | C  | -3.91775200 | -2.18491500 | -0.74070800 |
| H                                                      | 2.87754300  | 2.71777800  | 1.58530600  | H  | -4.89237900 | -2.40727000 | -1.18930200 |
| H                                                      | 3.11570300  | 3.53836900  | 0.05137400  | H  | -3.22665100 | -2.96933600 | -1.05081000 |
| C                                                      | -0.47071000 | 3.08781600  | 1.86966000  | C  | -4.06353400 | -2.04164800 | 0.77283900  |
| H                                                      | 0.08546900  | 2.91436300  | 2.79453200  | H  | -3.07775900 | -2.02297000 | 1.24440400  |
| H                                                      | -1.15266600 | 2.23967800  | 1.78791600  | H  | -4.62738000 | -2.86030000 | 1.22450000  |
| C                                                      | -1.24794600 | 4.40739200  | 1.94018200  | C  | -4.74645100 | -0.68379600 | 0.92402100  |
| H                                                      | -1.94585100 | 4.40651300  | 2.78338000  | H  | -5.83203000 | -0.80068400 | 0.84390100  |
| H                                                      | -1.83100800 | 4.58852500  | 1.03216100  | H  | -4.54010800 | -0.21124300 | 1.88758700  |
| H                                                      | -0.58220300 | 5.26563000  | 2.07517200  | Ir | 0.66566100  | -0.42090500 | -0.14077100 |
| C                                                      | 2.51347900  | 4.85621700  | 1.66187300  | N  | -2.00907500 | -0.64256800 | -1.14659600 |
| H                                                      | 2.12308300  | 5.66565400  | 1.03629800  | N  | -2.01019800 | 0.81425100  | 0.61494500  |
| H                                                      | 3.53719000  | 5.12463200  | 1.93837500  | C  | -1.29105000 | -0.04063600 | -0.15923600 |
| H                                                      | 1.92446200  | 4.83379300  | 2.58349400  | C  | -1.23777400 | -1.43710700 | -2.03333200 |
| C                                                      | 0.99919200  | 3.64236800  | -2.32484700 | C  | 0.11965000  | -1.54604000 | -1.68572300 |
| H                                                      | 2.02865600  | 3.98210700  | -2.17119200 | C  | 0.89335700  | -2.42200200 | -2.45072600 |
| H                                                      | 0.61235700  | 4.17201800  | -3.20022400 | C  | 0.36705100  | -3.09308900 | -3.55119300 |
| H                                                      | 1.02987900  | 2.57792100  | -2.57727200 | C  | -0.96078800 | -2.91184200 | -3.90913400 |
| C                                                      | 1.88158200  | -3.00296500 | 0.43356000  | C  | -1.77526100 | -2.08940600 | -3.13811300 |
| C                                                      | 2.95063600  | -2.32066800 | 1.25272100  | C  | -1.61390900 | 1.17174200  | 1.93433300  |
| H                                                      | 2.49609300  | -1.87267400 | 2.14195700  | C  | -1.63231300 | 2.50842100  | 2.32211900  |
| H                                                      | 3.68766100  | -3.05248400 | 1.58703100  | C  | -1.27130800 | 2.85904100  | 3.61507100  |
| H                                                      | 0.88353100  | 1.58895300  | -0.14240900 | C  | -0.88353700 | 1.88012400  | 4.52287900  |
| Cl                                                     | 1.13570900  | 0.14190600  | 2.46573900  | C  | -0.88237200 | 0.54539400  | 4.13600700  |
|                                                        |             |             |             | C  | -1.26377500 | 0.18624400  | 2.85062000  |
|                                                        |             |             |             | H  | -1.27453900 | 3.90320900  | 3.90720900  |
| <b>TS<sub>2</sub></b>                                  |             |             |             | H  | 0.99767100  | -3.76662100 | -4.12223500 |
| Sum of Thermal Correction to Free Energies and         |             |             |             | H  | -1.37674900 | -3.42397300 | -4.76949400 |
| Electronic Energy = -2571.706197                       |             |             |             | H  | -2.82077300 | -1.98854800 | -3.40131300 |
| Electronic Energy (EE) = -2572.400013                  |             |             |             | H  | -1.90450100 | 3.27422500  | 1.60379600  |
| Value of imaginary frequency = -97.97 cm <sup>-1</sup> |             |             |             | H  | 1.92447200  | -2.60939300 | -2.17605800 |
| C                                                      | -3.30735800 | 1.31270700  | 0.15255400  | H  | -0.59100500 | -0.22796700 | 4.83778900  |
| H                                                      | -3.75861800 | 1.83522200  | 0.99635600  | H  | -0.58856200 | 2.15708500  | 5.52859400  |
| C                                                      | -3.48083600 | -0.78323700 | -1.20301600 | H  | -1.26614500 | -0.85333100 | 2.54851900  |
| C                                                      | -4.23928400 | 0.17917500  | -0.25488100 |    |             |             |             |

|    |             |             |             |                                                |             |             |             |
|----|-------------|-------------|-------------|------------------------------------------------|-------------|-------------|-------------|
| C  | 5.47818500  | -1.45989600 | -0.52022500 | H                                              | 3.45143000  | -2.01746600 | 2.80464000  |
| C  | 4.82173300  | -1.65013700 | 0.68157500  | H                                              | 1.02357400  | 0.95364800  | -1.10318100 |
| C  | 3.46219300  | -1.36634500 | 0.79218700  | Cl                                             | 1.51609800  | 1.47491600  | 1.44571900  |
| C  | 3.41042900  | -0.72439000 | -1.43084800 |                                                |             |             |             |
| C  | 4.75264300  | -0.98863800 | -1.60506600 |                                                |             |             |             |
| H  | 6.53587300  | -1.67901800 | -0.61065400 | <b>IM<sub>3</sub></b>                          |             |             |             |
| H  | 5.35042000  | -2.02326300 | 1.54982500  | Sum of Thermal Correction to Free Energies and |             |             |             |
| H  | 2.80234400  | -0.35472600 | -2.24463200 | Electronic Energy = -1584.400818               |             |             |             |
| H  | 5.21043300  | -0.82315400 | -2.57149100 | Electronic Energy (EE) = -1584.911293          |             |             |             |
| C  | 0.50195200  | -2.11393200 | 1.05714600  | C                                              | -3.31728100 | 1.17442200  | -0.53919300 |
| C  | 1.41956500  | -3.57152700 | 2.79212700  | H                                              | -3.73195100 | 2.14032600  | -0.24182200 |
| C  | -0.56461400 | -3.02193800 | 0.97372400  | C                                              | -3.25985800 | -1.26541400 | 0.17210300  |
| C  | 0.32431600  | -4.42107800 | 2.71593200  | C                                              | -4.03110000 | 0.08434200  | 0.26306000  |
| H  | 2.21844400  | -3.78885700 | 3.49639600  | C                                              | -5.36698800 | -0.00507200 | -0.48038400 |
| C  | -0.66907800 | -4.14501300 | 1.78586500  | C                                              | -3.66576900 | 0.88459600  | -2.01622100 |
| H  | -1.34059900 | -2.85437500 | 0.23653600  | H                                              | -2.87415900 | 0.28694800  | -2.47311800 |
| H  | 0.25919700  | -5.29224100 | 3.35888700  | H                                              | -3.74479100 | 1.80954100  | -2.58992700 |
| H  | -1.52367100 | -4.80718800 | 1.68391600  | C                                              | -5.00257300 | 0.10620900  | -1.97275000 |
| N  | 2.76870100  | -0.90098500 | -0.26399400 | H                                              | -5.79066000 | 0.60355600  | -2.54084800 |
| Si | 1.41155400  | 2.67934400  | -0.52911800 | H                                              | -4.87425100 | -0.88594200 | -2.41173900 |
| C  | 0.12801200  | 3.11355100  | -1.85672600 | H                                              | -5.99207800 | 0.84128500  | -0.17533200 |
| H  | -0.81889700 | 3.33990900  | -1.35756400 | H                                              | -5.91711400 | -0.91837900 | -0.23720800 |
| H  | 0.48649400  | 4.08107300  | -2.23458900 | H                                              | -3.73517400 | -1.92545800 | -0.55652600 |
| C  | 3.13300000  | 2.52767800  | -1.28383100 | C                                              | -3.33389400 | -1.83821200 | 1.59809700  |
| H  | 3.77240200  | 1.96403000  | -0.59789800 | H                                              | -4.30827600 | -2.32155900 | 1.73171500  |
| H  | 3.04605000  | 1.91936600  | -2.18895400 | H                                              | -2.56197400 | -2.58436300 | 1.79008000  |
| C  | 1.33871400  | 4.25040500  | 0.56895000  | C                                              | -3.23693800 | -0.60147300 | 2.48677000  |
| H  | 2.26668900  | 4.27103700  | 1.15402200  | H                                              | -2.20545200 | -0.23764400 | 2.50522100  |
| H  | 0.54577700  | 4.09925300  | 1.30966600  | H                                              | -3.53668100 | -0.79357400 | 3.51894600  |
| C  | 1.12534300  | 5.60679500  | -0.11266200 | C                                              | -4.14669500 | 0.40028200  | 1.77380600  |
| H  | 1.19832300  | 6.42244800  | 0.61481000  | H                                              | -5.18328300 | 0.25568600  | 2.09550400  |
| H  | 0.13586900  | 5.67608400  | -0.57321800 | H                                              | -3.87996900 | 1.43810500  | 1.98884100  |
| H  | 1.86353700  | 5.80570000  | -0.89444500 | Ir                                             | 0.74494200  | -0.00573900 | -0.54419900 |
| C  | 3.79612100  | 3.86470800  | -1.63292600 | N                                              | -1.86150400 | -1.10156900 | -0.24744700 |
| H  | 3.20140300  | 4.43726800  | -2.35136900 | N                                              | -1.89878300 | 1.20485900  | -0.21441500 |
| H  | 4.78071600  | 3.70490900  | -2.08382800 | C                                              | -1.17159700 | 0.06317500  | -0.28210700 |
| H  | 3.93987900  | 4.49032900  | -0.74782000 | C                                              | -1.04151500 | -2.23011300 | -0.47677100 |
| C  | -0.08670700 | 2.16311300  | -3.02822700 | C                                              | 0.32711900  | -1.92460100 | -0.64146400 |
| H  | 0.85532500  | 1.94455400  | -3.54184500 | C                                              | 1.20278900  | -2.99809400 | -0.80589900 |
| H  | -0.76927000 | 2.59307800  | -3.76914500 | C                                              | 0.73712500  | -4.31005000 | -0.85677100 |
| H  | -0.49842800 | 1.20407800  | -2.70681200 | C                                              | -0.61867100 | -4.57954800 | -0.73397400 |
| C  | 1.51460600  | -2.44153200 | 1.97877200  | C                                              | -1.51635000 | -3.53430100 | -0.53393300 |
| C  | 2.74769300  | -1.57312100 | 2.09896500  | C                                              | -1.18764300 | 2.43539500  | -0.19419600 |
| H  | 2.47564100  | -0.59163900 | 2.49681800  | C                                              | -1.34041400 | 3.37141000  | -1.21552500 |
|    |             |             |             | C                                              | -0.62772500 | 4.56244800  | -1.17538400 |

|   |             |             |             |   |             |             |             |
|---|-------------|-------------|-------------|---|-------------|-------------|-------------|
| C | 0.25325400  | 4.82138000  | -0.13116300 | N | -2.02725600 | 1.01706500  | 0.12117800  |
| C | 0.40180300  | 3.88965400  | 0.88896200  | C | -1.24800400 | -0.07886100 | -0.15569900 |
| C | -0.32631300 | 2.70554900  | 0.86952000  | C | -1.18126100 | -2.34140100 | -0.79539800 |
| H | -0.74824100 | 5.28382600  | -1.97559300 | C | 0.20887500  | -2.15062700 | -0.71628300 |
| H | 1.44306000  | -5.12413700 | -0.98486800 | C | 0.99796800  | -3.28769300 | -0.90216500 |
| H | -0.98368700 | -5.59955500 | -0.77594200 | C | 0.44858000  | -4.53338300 | -1.19421100 |
| H | -2.57103300 | -3.75163300 | -0.41319600 | C | -0.92782300 | -4.67598300 | -1.29875000 |
| H | -1.99675800 | 3.15773700  | -2.05009900 | C | -1.75340100 | -3.57740700 | -1.08561100 |
| H | 2.26869500  | -2.81443300 | -0.87769000 | C | -1.57184000 | 2.11546000  | 0.89832500  |
| H | 1.07127100  | 4.08675200  | 1.71888300  | C | -1.82111200 | 3.42538000  | 0.48827900  |
| H | 0.81525600  | 5.74803500  | -0.11021800 | C | -1.42830500 | 4.49521500  | 1.28349900  |
| H | -0.23816800 | 1.99239800  | 1.67929000  | C | -0.76004700 | 4.27305000  | 2.47978500  |
| C | 5.59531200  | -0.22557100 | -1.52486200 | C | -0.50826500 | 2.96685900  | 2.88647300  |
| C | 5.14047000  | 0.46966300  | -0.41865100 | C | -0.92615100 | 1.89422600  | 2.11375300  |
| C | 3.77402500  | 0.55698400  | -0.16632700 | H | -1.62969200 | 5.50750800  | 0.95078600  |
| C | 3.32529800  | -0.68932800 | -2.06661700 | H | 1.09607100  | -5.39407100 | -1.32881200 |
| C | 4.66552000  | -0.81261900 | -2.37239500 | H | -1.36835700 | -5.64087800 | -1.52441700 |
| H | 6.65727300  | -0.30276800 | -1.72791400 | H | -2.82630200 | -3.71528500 | -1.13522700 |
| H | 5.83415400  | 0.94906500  | 0.26068800  | H | -2.30674600 | 3.61741600  | -0.46192700 |
| H | 2.55748800  | -1.12107200 | -2.69491300 | H | 2.07518900  | -3.21446400 | -0.79298900 |
| H | 4.96509000  | -1.35796600 | -3.25782200 | H | 0.00451000  | 2.77329000  | 3.82200400  |
| C | 1.30040700  | -0.21191700 | 1.47991900  | H | -0.44359200 | 5.10880800  | 3.09331800  |
| C | 2.83188100  | 0.37146000  | 3.29895500  | H | -0.74361700 | 0.88072500  | 2.44419500  |
| C | 0.60909700  | -0.99916800 | 2.41394500  | C | 5.55486500  | -1.11723900 | -0.77098100 |
| C | 2.11159900  | -0.40434200 | 4.19934100  | C | 5.06426300  | -0.51360500 | 0.37259300  |
| H | 3.71368000  | 0.90980100  | 3.63764700  | C | 3.70445000  | -0.24011000 | 0.49114000  |
| C | 0.99434800  | -1.09570000 | 3.74742600  | C | 3.32418100  | -1.16235000 | -1.59453200 |
| H | -0.26022700 | -1.56428000 | 2.08779900  | C | 4.66165400  | -1.45049800 | -1.77856800 |
| H | 2.42320900  | -0.47182400 | 5.23630500  | H | 6.61314300  | -1.32827800 | -0.87280200 |
| H | 0.42385500  | -1.71555400 | 4.43292100  | H | 5.72619400  | -0.24185400 | 1.18534500  |
| N | 2.88204400  | -0.03679500 | -0.97936300 | H | 2.59041600  | -1.41873900 | -2.34594000 |
| C | 2.43398900  | 0.46659900  | 1.96604500  | H | 4.98448200  | -1.93190100 | -2.69251100 |
| C | 3.24537200  | 1.32571500  | 1.01455300  | C | 2.12007600  | -0.41428900 | 2.40805700  |
| H | 2.62634400  | 2.14786800  | 0.63323400  | C | 0.97867000  | -0.81344800 | 1.68851200  |
| H | 4.08565400  | 1.78642200  | 1.53751900  | C | 2.32434700  | -0.79678200 | 3.73400900  |
| H | 0.48755100  | 0.24667300  | -2.17542900 | C | 0.08409400  | -1.64622500 | 2.37988800  |
|   |             |             |             | C | 1.39887500  | -1.59235500 | 4.39629000  |
|   |             |             |             | H | 3.21965500  | -0.46609200 | 4.25443900  |
|   |             |             |             | C | 0.27393500  | -2.02377700 | 3.70415200  |
|   |             |             |             | H | -0.79175500 | -2.02482700 | 1.86366200  |
|   |             |             |             | H | 1.56061000  | -1.88008300 | 5.42969200  |
|   |             |             |             | H | -0.45481700 | -2.66434900 | 4.19209600  |
|   |             |             |             | N | 2.84378000  | -0.56352200 | -0.49343100 |
|   |             |             |             | H | 0.98407400  | 1.41703000  | 0.06962000  |

**STS<sub>1</sub>**  
Sum of Thermal Correction to Free Energies and  
Electronic Energy = -1820.123579  
Electronic Energy (EE) = -1820.792282  
Value of imaginary frequency = -541.13 cm<sup>-1</sup>

|    |             |             |             |
|----|-------------|-------------|-------------|
| Ir | 0.71380900  | -0.20210400 | -0.29903700 |
| N  | -1.95586600 | -1.18464800 | -0.49381200 |

|   |             |             |             |                                                |             |             |             |
|---|-------------|-------------|-------------|------------------------------------------------|-------------|-------------|-------------|
| C | 0.66296600  | 0.56946300  | -2.32577400 |                                                |             |             |             |
| H | 1.53359400  | 0.34879900  | -2.93876800 | <b>IM<sub>4</sub></b>                          |             |             |             |
| H | -0.27109700 | 0.36394900  | -2.84076700 | Sum of Thermal Correction to Free Energies and |             |             |             |
| C | 0.72515500  | 1.72867400  | -1.47391800 | Electronic Energy = -1820.149608               |             |             |             |
| H | -0.23808000 | 2.20437200  | -1.30212300 | Electronic Energy (EE) = -1820.814936          |             |             |             |
| C | 1.78855500  | 2.83103400  | -1.63069900 | Ir                                             | 0.60719900  | -0.35162900 | -0.17599700 |
| C | 1.40639800  | 3.57559500  | -2.92215300 | N                                              | -2.13391800 | -0.56359000 | -0.87194400 |
| H | 1.50234900  | 2.92319800  | -3.79473600 | N                                              | -1.85011200 | 0.93322200  | 0.85188600  |
| H | 2.05690700  | 4.44332000  | -3.07078100 | C                                              | -1.28592500 | 0.02912600  | 0.00543100  |
| H | 0.37255600  | 3.93446800  | -2.88193900 | C                                              | -1.48082500 | -1.41101700 | -1.79347800 |
| C | 3.22284100  | 2.32079700  | -1.76290400 | C                                              | -0.08171100 | -1.47580100 | -1.62363700 |
| H | 3.32145500  | 1.54825400  | -2.52893100 | C                                              | 0.62008900  | -2.35233600 | -2.45348800 |
| H | 3.58851000  | 1.91680700  | -0.81883900 | C                                              | -0.02995900 | -3.09000600 | -3.43989100 |
| H | 3.88141800  | 3.14926400  | -2.04238700 | C                                              | -1.40335500 | -2.98100200 | -3.60859000 |
| C | 1.71376700  | 3.80882200  | -0.45540900 | C                                              | -2.13799900 | -2.14568600 | -2.77225100 |
| H | 0.72617300  | 4.26991300  | -0.38520000 | C                                              | -1.03385100 | 1.53416900  | 1.84592900  |
| H | 2.45371700  | 4.60732000  | -0.57071400 | C                                              | -0.90586400 | 2.91953600  | 1.92367600  |
| H | 1.90796300  | 3.30494300  | 0.49604700  | C                                              | -0.08542400 | 3.48843900  | 2.88851600  |
| C | 3.16027500  | 0.43552200  | 1.71717000  | C                                              | 0.62418500  | 2.68385000  | 3.77289900  |
| H | 3.98798100  | 0.66336300  | 2.39140800  | C                                              | 0.48302600  | 1.30282900  | 3.70545000  |
| H | 2.70509200  | 1.38478000  | 1.40887400  | C                                              | -0.35670700 | 0.72629300  | 2.75985100  |
| C | -3.31431000 | 1.15752700  | -0.56758300 | H                                              | 0.01525200  | 4.56708400  | 2.93353600  |
| H | -3.79958800 | 2.03000500  | -0.13394600 | H                                              | 0.54252700  | -3.76415900 | -4.06862400 |
| C | -3.38289300 | -1.34852500 | -0.20808800 | H                                              | -1.91200000 | -3.55636800 | -4.37378600 |
| C | -4.22632300 | -0.04868500 | -0.32495100 | H                                              | -3.21357100 | -2.08733600 | -2.88860500 |
| C | -5.08976600 | -0.07500800 | -1.59361300 | H                                              | -1.42026500 | 3.55171600  | 1.21083300  |
| C | -3.20187300 | 1.32876900  | -2.10778600 | H                                              | 1.68596600  | -2.48779100 | -2.31366500 |
| H | -2.16509900 | 1.26059500  | -2.43863600 | H                                              | 1.01117400  | 0.66287100  | 4.40353800  |
| H | -3.56840100 | 2.31921400  | -2.39132400 | H                                              | 1.27418200  | 3.13141800  | 4.51586300  |
| C | -4.08929600 | 0.22789600  | -2.71157500 | H                                              | -0.49321500 | -0.34724600 | 2.72645700  |
| H | -4.57015900 | 0.53050700  | -3.64352600 | C                                              | 5.46880600  | -1.07625800 | -0.86700500 |
| H | -3.48688700 | -0.66086300 | -2.92602600 | C                                              | 4.90367000  | -1.20457200 | 0.38951100  |
| H | -5.84184500 | 0.72096400  | -1.53899500 | C                                              | 3.53899400  | -0.99383500 | 0.56092100  |
| H | -5.62045400 | -1.02246300 | -1.72150700 | C                                              | 3.30322000  | -0.54317000 | -1.69681400 |
| H | -3.76606600 | -2.04929400 | -0.94933400 | C                                              | 4.64994600  | -0.73352800 | -1.93410000 |
| C | -3.64913400 | -1.90209600 | 1.20249600  | H                                              | 6.53083100  | -1.23728300 | -1.01172800 |
| H | -3.52266300 | -2.98468600 | 1.25563900  | H                                              | 5.50900000  | -1.46485200 | 1.24879000  |
| H | -2.94050400 | -1.44565300 | 1.90050000  | H                                              | 2.62605500  | -0.27327300 | -2.49584300 |
| C | -5.05858200 | -1.41018500 | 1.51660500  | H                                              | 5.03952800  | -0.61518300 | -2.93674700 |
| H | -5.30473300 | -1.47459600 | 2.57831200  | C                                              | 1.79565900  | -2.14802000 | 1.95796500  |
| H | -5.80258500 | -1.99651400 | 0.96577300  | C                                              | 0.70030700  | -2.02959700 | 1.07856500  |
| C | -5.01309400 | 0.02655500  | 0.99667900  | C                                              | 1.90647300  | -3.20664600 | 2.85779900  |
| H | -5.99715200 | 0.48105700  | 0.85916600  | C                                              | -0.25163000 | -3.05877300 | 1.14671600  |
| H | -4.45964900 | 0.64289200  | 1.71423800  | C                                              | 0.92898100  | -4.19308600 | 2.91422900  |

|   |             |             |             |                                                          |             |             |             |
|---|-------------|-------------|-------------|----------------------------------------------------------|-------------|-------------|-------------|
| H | 2.76479700  | -3.26130500 | 3.52304500  | H                                                        | -3.19707300 | -2.32418100 | 0.58365100  |
| C | -0.15164900 | -4.11752300 | 2.04403700  | C                                                        | -5.19877300 | -1.57685600 | 0.86454500  |
| H | -1.09877800 | -3.03784200 | 0.46633500  | H                                                        | -5.37991600 | -2.30921900 | 1.65381300  |
| H | 1.01679000  | -5.01195100 | 3.62040200  | H                                                        | -6.12069800 | -1.48385300 | 0.28029000  |
| H | -0.91785100 | -4.88724500 | 2.06093400  | C                                                        | -4.76727300 | -0.21188600 | 1.39439900  |
| N | 2.75044000  | -0.67607100 | -0.48152600 | H                                                        | -5.57480000 | 0.36384600  | 1.85341800  |
| H | 2.77599400  | 2.00947900  | -0.49040600 | H                                                        | -3.98046400 | -0.34771600 | 2.14601300  |
| C | 0.83486800  | 1.49419800  | -1.28878400 |                                                          |             |             |             |
| H | 1.23269900  | 1.28892800  | -2.29206300 |                                                          |             |             |             |
| H | -0.12689500 | 1.98985400  | -1.46432900 | <b>TS<sub>3</sub></b>                                    |             |             |             |
| C | 1.77544800  | 2.45961500  | -0.55541200 | Sum of Thermal Correction to Free Energies and           |             |             |             |
| H | 1.44073000  | 2.58961800  | 0.48443800  | Electronic Energy = -1820.113448                         |             |             |             |
| C | 1.96084200  | 3.87926300  | -1.14523500 | Electronic Energy (EE) = -1820.780782                    |             |             |             |
| C | 0.64408100  | 4.66237300  | -1.10379700 | Value of imaginary frequency = -1023.86 cm <sup>-1</sup> |             |             |             |
| H | -0.13761200 | 4.16859900  | -1.68773300 | C                                                        | -0.97833500 | -0.18623400 | 2.29302000  |
| H | 0.77614100  | 5.67067800  | -1.51169300 | C                                                        | 0.29911600  | 0.38654100  | 2.09726300  |
| H | 0.28401900  | 4.76263900  | -0.07471800 | C                                                        | 0.92923600  | 0.91338600  | 3.22435900  |
| C | 2.46151700  | 3.79612900  | -2.59056700 | C                                                        | 0.38236600  | 0.79890500  | 4.50086000  |
| H | 1.71505000  | 3.33990100  | -3.24642100 | C                                                        | -0.83389700 | 0.15662800  | 4.66915300  |
| H | 3.37540100  | 3.19434100  | -2.65443300 | C                                                        | -1.52387300 | -0.33081000 | 3.56314700  |
| H | 2.68838600  | 4.79297300  | -2.98441700 | H                                                        | 1.87209300  | 1.43781800  | 3.10292100  |
| C | 3.00015600  | 4.61806900  | -0.29358800 | H                                                        | 0.90698800  | 1.21101900  | 5.35600200  |
| H | 2.68552500  | 4.66275400  | 0.75510700  | H                                                        | -1.26471700 | 0.04471700  | 5.65779000  |
| H | 3.14757500  | 5.64568600  | -0.64408500 | H                                                        | -2.48165500 | -0.81387700 | 3.70820000  |
| H | 3.96987000  | 4.10975900  | -0.32867800 | N                                                        | -1.66939300 | -0.61476800 | 1.12704900  |
| C | 2.89370200  | -1.09962700 | 1.91528100  | C                                                        | -0.94255100 | -0.55050200 | -0.00689400 |
| H | 3.66446400  | -1.32410300 | 2.65533100  | Ir                                                       | 0.84475700  | 0.17685800  | 0.01411600  |
| H | 2.48948700  | -0.11309400 | 2.17796300  | N                                                        | -1.45210300 | -0.99924000 | -1.16674900 |
| C | -3.12551400 | 1.55564100  | 0.50796000  | C                                                        | -0.57025100 | -0.88030200 | -2.28287300 |
| H | -3.45887000 | 2.08753500  | 1.40147700  | C                                                        | -0.92095000 | -1.30355300 | -3.55725400 |
| C | -3.58679200 | -0.64071600 | -0.70798900 | C                                                        | 0.69668400  | -0.32826100 | -1.98374100 |
| C | -4.18093900 | 0.50059800  | 0.16962500  | C                                                        | 0.00281200  | -1.17432000 | -4.59271700 |
| C | -5.19723300 | 1.31792100  | -0.63867400 | H                                                        | -1.89142600 | -1.73813600 | -3.76598300 |
| C | -3.08810300 | 2.52932100  | -0.70180700 | C                                                        | 1.59001500  | -0.22937100 | -3.04708700 |
| H | -2.16306400 | 2.40292300  | -1.26539500 | C                                                        | 1.25624400  | -0.64086700 | -4.33843300 |
| H | -3.11708700 | 3.56436800  | -0.35352800 | H                                                        | -0.26415600 | -1.50320300 | -5.59101900 |
| C | -4.32610900 | 2.18581000  | -1.55428700 | H                                                        | 2.58976200  | 0.15521300  | -2.86774200 |
| H | -4.85276200 | 3.07207000  | -1.91214700 | H                                                        | 1.98293500  | -0.55521400 | -5.13997800 |
| H | -4.02274600 | 1.61474900  | -2.43632500 | C                                                        | -2.66973400 | -1.79100800 | -1.18134900 |
| H | -5.77223300 | 1.95047500  | 0.04727200  | H                                                        | -3.10361800 | -1.72882000 | -2.18054400 |
| H | -5.90800600 | 0.69096800  | -1.18355600 | C                                                        | -3.11085800 | -0.91230600 | 1.18649900  |
| H | -4.01687000 | -0.56823100 | -1.70873100 | C                                                        | -3.70873900 | -1.24281800 | -0.20727000 |
| C | -4.02431400 | -1.96295900 | -0.03392000 | C                                                        | -4.69015200 | -2.42213200 | -0.09802300 |
| H | -4.25999700 | -2.74419500 | -0.75795900 | C                                                        | -2.47349900 | -3.26285900 | -0.77473900 |
|   |             |             |             | H                                                        | -1.68683400 | -3.32033000 | -0.01951300 |

|   |             |             |             |                                                |             |             |             |
|---|-------------|-------------|-------------|------------------------------------------------|-------------|-------------|-------------|
| H | -2.15504000 | -3.87583200 | -1.61951900 | H                                              | -3.81566500 | 4.98809900  | -0.50205900 |
| C | -3.82736000 | -3.70014300 | -0.17436700 | C                                              | -1.12215900 | 5.11671700  | -0.01941300 |
| H | -4.31810400 | -4.46291700 | -0.78142900 | C                                              | -1.83231900 | 4.01963000  | -2.15781300 |
| H | -3.67790200 | -4.13468300 | 0.81617300  | H                                              | -0.07699500 | 5.11758900  | -0.34177000 |
| H | -5.37896500 | -2.37930000 | -0.94760700 | H                                              | -1.55991800 | 6.07415200  | -0.32109200 |
| H | -5.29773000 | -2.37667400 | 0.80889000  | H                                              | -1.13619900 | 5.07163300  | 1.07504900  |
| H | -3.23079800 | -1.77091700 | 1.85219700  | H                                              | -2.32495500 | 4.92588300  | -2.52579100 |
| C | -3.92287600 | 0.31620400  | 1.69088200  | H                                              | -0.79938600 | 4.03730700  | -2.51607400 |
| H | -4.34912300 | 0.14850600  | 2.68075400  | H                                              | -2.32782400 | 3.15710100  | -2.61673100 |
| H | -3.24709100 | 1.17009900  | 1.77291100  | C                                              | -1.34625800 | 2.59662000  | -0.12398400 |
| C | -4.99648400 | 0.59843700  | 0.63083700  | C                                              | 0.09981400  | 2.26440200  | -0.48408400 |
| H | -5.24804700 | 1.65928400  | 0.57631400  | H                                              | -1.99034700 | 1.80752400  | -0.52233900 |
| H | -5.91807600 | 0.05480200  | 0.86041800  | H                                              | 0.21090100  | 2.23047300  | -1.56853900 |
| C | -4.38221400 | 0.05623600  | -0.65498500 | H                                              | 0.77093500  | 3.04811400  | -0.11340200 |
| H | -5.10958400 | -0.11723100 | -1.45204300 | H                                              | 0.40136500  | 1.44377700  | 0.91274000  |
| H | -3.62814400 | 0.75048200  | -1.04019000 |                                                |             |             |             |
| C | 3.19242300  | 1.90644000  | -0.96689300 |                                                |             |             |             |
| C | 4.46510000  | 2.41012600  | -1.14450000 | <b>SIM<sub>2</sub></b>                         |             |             |             |
| C | 5.49519400  | 1.89034600  | -0.37434800 | Sum of Thermal Correction to Free Energies and |             |             |             |
| C | 5.19818800  | 0.89137500  | 0.53404500  | Electronic Energy = -2110.859136               |             |             |             |
| C | 3.88998500  | 0.43138000  | 0.66991400  | Electronic Energy (EE) = -2111.544821          |             |             |             |
| N | 2.89485200  | 0.94274100  | -0.07933400 | C                                              | -1.08265400 | 0.63728900  | -2.05746300 |
| H | 6.51090700  | 2.25234400  | -0.48410000 | C                                              | 0.30754900  | 0.49103200  | -1.82988800 |
| H | 2.36862100  | 2.27324200  | -1.56256400 | C                                              | 1.12969200  | 0.86987700  | -2.89125000 |
| H | 4.63509400  | 3.18661800  | -1.87895700 | C                                              | 0.63361700  | 1.36175100  | -4.09832100 |
| H | 5.97390100  | 0.45142500  | 1.14824000  | C                                              | -0.73358900 | 1.49021700  | -4.27774900 |
| C | 3.56168100  | -0.65335300 | 1.65295000  | C                                              | -1.59949900 | 1.12715900  | -3.25072700 |
| H | 4.47866200  | -0.94298000 | 2.16906500  | H                                              | 2.20586300  | 0.80894200  | -2.77127500 |
| H | 2.88402700  | -0.24591100 | 2.40538200  | H                                              | 1.31905300  | 1.64879600  | -4.88890400 |
| C | 2.91436200  | -1.86179500 | 1.01664200  | H                                              | -1.13631600 | 1.87732700  | -5.20714300 |
| C | 3.52941100  | -3.10325500 | 1.18133600  | H                                              | -2.66497800 | 1.25110900  | -3.39382300 |
| C | 1.72196400  | -1.72059800 | 0.28361500  | N                                              | -1.94300700 | 0.33997500  | -0.95207500 |
| C | 2.97758500  | -4.25426100 | 0.63696800  | C                                              | -1.29034100 | 0.02525100  | 0.17263600  |
| H | 4.45290400  | -3.16832500 | 1.75073800  | Ir                                             | 0.68945000  | -0.21014600 | 0.14837400  |
| C | 1.20587000  | -2.90202600 | -0.26849700 | N                                              | -1.95404100 | -0.21486500 | 1.31591400  |
| C | 1.80417200  | -4.14480200 | -0.09572800 | C                                              | -1.14985700 | -0.74367100 | 2.37306800  |
| H | 3.46076500  | -5.21531800 | 0.77716400  | C                                              | -1.67904200 | -1.07495700 | 3.61351600  |
| H | 0.31300500  | -2.85970000 | -0.87970000 | C                                              | 0.21127800  | -0.95902800 | 2.05283800  |
| H | 1.35529800  | -5.02509800 | -0.54598200 | C                                              | -0.85415300 | -1.66869800 | 4.56733100  |
| H | -1.47536700 | 2.56675000  | 0.96684900  | H                                              | -2.71625900 | -0.88102300 | 3.85996700  |
| C | -3.36765600 | 4.03867600  | -0.19030200 | C                                              | 0.99630900  | -1.56038900 | 3.03049800  |
| C | -1.90069700 | 3.94584900  | -0.62827800 | C                                              | 0.47583000  | -1.92340500 | 4.27400800  |
| H | -3.95872100 | 3.23013300  | -0.63322800 | H                                              | -1.26325300 | -1.92903600 | 5.53740600  |
| H | -3.45971700 | 3.96722100  | 0.89891500  | H                                              | 2.04512700  | -1.74095400 | 2.81877700  |
|   |             |             |             | H                                              | 1.11594500  | -2.39293300 | 5.01372100  |





|   |             |             |             |                                                         |             |             |             |
|---|-------------|-------------|-------------|---------------------------------------------------------|-------------|-------------|-------------|
| C | -1.29634500 | -1.28917100 | -2.15520200 | H                                                       | 3.26027200  | 3.79303400  | 0.47882200  |
| C | -0.18760100 | -0.71858800 | -2.78892900 | H                                                       | 2.23725500  | 2.66550200  | 1.35345100  |
| C | -1.76428500 | -2.51787800 | -2.62203300 | C                                                       | 3.44976400  | 1.75027300  | -0.16687900 |
| C | 0.46643100  | -1.38644800 | -3.81482300 | C                                                       | 4.76658600  | 2.00067600  | -0.55379700 |
| H | 0.16669300  | 0.26731200  | -2.50908000 | C                                                       | 2.86872500  | 0.46863600  | -0.28948100 |
| C | -1.12215300 | -3.16776100 | -3.66798200 | C                                                       | 5.55770100  | 0.99570600  | -1.09612500 |
| C | 0.00438700  | -2.61649300 | -4.26220700 | H                                                       | 5.17895200  | 2.99952500  | -0.43459700 |
| H | 1.33664100  | -0.92662300 | -4.26878300 | C                                                       | 3.69955100  | -0.51266400 | -0.86543800 |
| H | -1.49936500 | -4.12750100 | -4.00268000 | C                                                       | 5.01046900  | -0.26896200 | -1.26250000 |
| H | 0.51260500  | -3.13604300 | -5.06575800 | H                                                       | 6.58136400  | 1.20204700  | -1.39058800 |
| C | -3.36774800 | -0.90320900 | -0.84938500 | H                                                       | 3.31064400  | -1.51698300 | -1.01085500 |
| H | -3.80604200 | -1.05524300 | -1.83840300 | H                                                       | 5.60356300  | -1.06896100 | -1.69552900 |
| C | -3.27642100 | 0.89175600  | 0.96328700  | Si                                                      | 1.08349500  | -2.01926900 | 0.89987100  |
| C | -4.07379600 | 0.29855500  | -0.22379500 | C                                                       | -0.29687400 | -2.45214800 | 2.15860500  |
| C | -5.37028000 | -0.33973800 | 0.29395000  | C                                                       | -0.66096700 | -3.93095100 | 2.32184000  |
| C | -3.70249100 | -2.11092300 | 0.06355100  | H                                                       | -1.19726700 | -1.89513600 | 1.88127000  |
| H | -2.84262300 | -2.36666200 | 0.68441200  | H                                                       | -0.00185500 | -2.03317800 | 3.12878500  |
| H | -3.93759600 | -2.99403100 | -0.53302700 | H                                                       | -1.48044200 | -4.07032000 | 3.03695800  |
| C | -4.91296200 | -1.66842400 | 0.91343000  | H                                                       | -0.98214400 | -4.37291100 | 1.37256900  |
| H | -5.71187400 | -2.41154100 | 0.92142100  | H                                                       | 0.18463600  | -4.52324400 | 2.68212800  |
| H | -4.60808900 | -1.51939200 | 1.95246300  | C                                                       | 2.72941700  | -2.23195100 | 1.85114400  |
| H | -6.03815900 | -0.52482900 | -0.55464300 | C                                                       | 2.78675400  | -3.33607800 | 2.91227500  |
| H | -5.90514800 | 0.30048600  | 0.99998700  | H                                                       | 2.95330400  | -1.26996800 | 2.32418600  |
| H | -3.69707100 | 0.52707900  | 1.90255200  | H                                                       | 3.53570600  | -2.38116700 | 1.12559800  |
| C | -3.43277900 | 2.43353700  | 0.84986900  | H                                                       | 3.76322600  | -3.36312400 | 3.40948000  |
| H | -3.71109000 | 2.89218100  | 1.79961200  | H                                                       | 2.03378600  | -3.18451900 | 3.69195200  |
| H | -2.46734800 | 2.85735000  | 0.56016000  | H                                                       | 2.61706900  | -4.32788200 | 2.48313400  |
| C | -4.47013500 | 2.67410500  | -0.25286300 | C                                                       | 1.02486600  | -3.34083400 | -0.48647100 |
| H | -4.32497500 | 3.63330200  | -0.75456700 | C                                                       | 1.73512700  | -4.67271600 | -0.22573600 |
| H | -5.48250500 | 2.67268900  | 0.16291400  | H                                                       | 1.43270800  | -2.89430800 | -1.40113300 |
| C | -4.28699000 | 1.47544000  | -1.17950900 | H                                                       | -0.03157500 | -3.52604100 | -0.71416100 |
| H | -5.12919600 | 1.30624700  | -1.85512500 | H                                                       | 1.65975300  | -5.34523700 | -1.08825200 |
| H | -3.39045900 | 1.61126100  | -1.79544100 | H                                                       | 2.80060900  | -4.52416300 | -0.02345000 |
| C | -0.48908800 | 2.65896300  | -1.57846200 | H                                                       | 1.31259300  | -5.20005600 | 0.63419300  |
| C | -0.74952900 | 3.94810400  | -1.99935800 | H                                                       | -2.61252100 | -2.99718000 | -2.15310400 |
| C | 0.15165600  | 4.94424800  | -1.64982500 |                                                         |             |             |             |
| C | 1.25915800  | 4.59955300  | -0.89687200 |                                                         |             |             |             |
| C | 1.45454700  | 3.27644700  | -0.50026100 |                                                         |             |             |             |
| N | 0.58318200  | 2.31652500  | -0.85052800 |                                                         |             |             |             |
| H | -0.00661000 | 5.97127100  | -1.95835900 |                                                         |             |             |             |
| H | -1.17164000 | 1.85631700  | -1.83002600 |                                                         |             |             |             |
| H | -1.63523100 | 4.15704200  | -2.58582400 |                                                         |             |             |             |
| H | 1.98253300  | 5.34945900  | -0.60157300 |                                                         |             |             |             |
| C | 2.63141400  | 2.90780500  | 0.36291100  |                                                         |             |             |             |
|   |             |             |             | <b>TS<sub>4</sub></b>                                   |             |             |             |
|   |             |             |             | Sum of Thermal Correction to Free Energies and          |             |             |             |
|   |             |             |             | Electronic Energy = -2110.824656                        |             |             |             |
|   |             |             |             | Electronic Energy (EE) = -2111.510405                   |             |             |             |
|   |             |             |             | Value of imaginary frequency = -113.59 cm <sup>-1</sup> |             |             |             |
|   |             |             |             | C                                                       | -1.58415200 | 2.26409800  | 0.59378500  |
|   |             |             |             | C                                                       | -0.21154600 | 2.27132200  | 0.28073100  |
|   |             |             |             | C                                                       | 0.47543800  | 3.46463700  | 0.56157600  |

|    |             |             |             |    |             |             |             |
|----|-------------|-------------|-------------|----|-------------|-------------|-------------|
| C  | -0.16443400 | 4.57008400  | 1.11493600  | C  | 1.94868100  | 2.34047600  | -2.15664500 |
| C  | -1.51915500 | 4.51702900  | 1.41986700  | C  | 2.85287800  | 3.18564000  | -2.77111100 |
| C  | -2.23455300 | 3.35201200  | 1.16166800  | C  | 4.13849800  | 3.27071400  | -2.25695400 |
| H  | 1.53991700  | 3.53458400  | 0.36036600  | C  | 4.47020200  | 2.48310600  | -1.16718500 |
| H  | 0.40085200  | 5.47557400  | 1.31336400  | C  | 3.51535200  | 1.63840400  | -0.61340800 |
| H  | -2.01999800 | 5.37181400  | 1.86087900  | N  | 2.26146600  | 1.58208200  | -1.09339800 |
| H  | -3.28840600 | 3.30712200  | 1.41262400  | H  | 4.87136100  | 3.93502400  | -2.70003700 |
| N  | -2.22350300 | 1.04060300  | 0.29301800  | H  | 0.92448000  | 2.26970800  | -2.49807600 |
| C  | -1.33770400 | 0.06898400  | -0.12352300 | H  | 2.54193800  | 3.77239200  | -3.62555700 |
| Ir | 0.55145000  | 0.50341900  | -0.20755500 | H  | 5.46544300  | 2.50926300  | -0.74063000 |
| N  | -1.98011600 | -1.08715000 | -0.52758600 | C  | 3.84397800  | 0.69603000  | 0.51193700  |
| C  | -1.35975600 | -2.01883600 | -1.38516600 | H  | 4.90044300  | 0.78288000  | 0.77030800  |
| C  | -0.66003300 | -1.58331000 | -2.51175100 | H  | 3.25750400  | 0.97391700  | 1.39329000  |
| C  | -1.46718200 | -3.38975200 | -1.13808000 | C  | 3.50433400  | -0.69692300 | 0.03970700  |
| C  | -0.05338600 | -2.50318300 | -3.35580400 | C  | 4.47129700  | -1.43847100 | -0.61833100 |
| H  | -0.60003300 | -0.52146600 | -2.71838600 | C  | 2.17386200  | -1.16465900 | 0.14981600  |
| C  | -0.87385300 | -4.30430800 | -1.99739300 | C  | 4.14768500  | -2.65658600 | -1.21433500 |
| C  | -0.15733800 | -3.86595600 | -3.10590800 | H  | 5.48627900  | -1.05775600 | -0.68521800 |
| H  | 0.49840200  | -2.14905700 | -4.21924600 | C  | 1.88019700  | -2.38503700 | -0.47049200 |
| H  | -0.95902000 | -5.36475100 | -1.78759600 | C  | 2.84541300  | -3.11985400 | -1.15658300 |
| H  | 0.31302000  | -4.58146900 | -3.77063600 | H  | 4.91383400  | -3.22971700 | -1.72534900 |
| C  | -3.34059100 | -1.36367700 | -0.06984800 | H  | 0.88101900  | -2.78909800 | -0.40047500 |
| H  | -3.66970800 | -2.26012500 | -0.59624300 | H  | 2.57065200  | -4.05685000 | -1.62813900 |
| C  | -3.62137200 | 1.13544700  | -0.15562900 | Si | 1.18538600  | -0.88248500 | 1.94150700  |
| C  | -4.29165000 | -0.23243000 | -0.44833900 | C  | 0.75210300  | 0.62136000  | 3.06536500  |
| C  | -5.47658500 | -0.48358900 | 0.49084700  | C  | -0.70875800 | 0.70466500  | 3.51693700  |
| C  | -3.50721500 | -1.56480900 | 1.45636000  | H  | 1.01733100  | 1.54775200  | 2.55189200  |
| H  | -2.66258400 | -1.13317300 | 1.99035700  | H  | 1.39359100  | 0.56988000  | 3.95218900  |
| H  | -3.53153000 | -2.62962500 | 1.69996500  | H  | -0.90794500 | 1.64744200  | 4.03670500  |
| C  | -4.82096300 | -0.84539000 | 1.83121900  | H  | -1.39583100 | 0.65234900  | 2.66990500  |
| H  | -5.47461400 | -1.45550100 | 2.45717700  | H  | -0.96154200 | -0.10804000 | 4.20601500  |
| H  | -4.59438900 | 0.06350000  | 2.39615400  | C  | 2.71255100  | -1.59014200 | 2.89273700  |
| H  | -6.05552300 | -1.33331400 | 0.11111700  | C  | 2.48746400  | -1.81353600 | 4.39476500  |
| H  | -6.15472900 | 0.37146800  | 0.55902100  | H  | 3.58441800  | -0.94004000 | 2.75635900  |
| H  | -4.17265100 | 1.61985600  | 0.65193900  | H  | 2.98071700  | -2.53730600 | 2.41129700  |
| C  | -3.76024600 | 1.96423800  | -1.45461500 | H  | 3.22513800  | -2.50708300 | 4.81333800  |
| H  | -3.92324300 | 3.02436400  | -1.25666000 | H  | 2.57068700  | -0.88157600 | 4.96039600  |
| H  | -2.82808600 | 1.87765900  | -2.02203800 | H  | 1.49713900  | -2.22766300 | 4.61297100  |
| C  | -4.89892000 | 1.29423100  | -2.22182300 | C  | -0.10054400 | -2.27913600 | 2.12101200  |
| H  | -4.89173500 | 1.53803400  | -3.28651700 | C  | 0.39945600  | -3.71946100 | 2.28502200  |
| H  | -5.86967500 | 1.60336700  | -1.81856300 | H  | -0.77868200 | -2.23102800 | 1.26971200  |
| C  | -4.65513500 | -0.18643700 | -1.93832400 | H  | -0.71710900 | -2.02287400 | 2.99018500  |
| H  | -5.50566100 | -0.83151300 | -2.17260100 | H  | -0.44221300 | -4.41877300 | 2.34701700  |
| H  | -3.80047900 | -0.53023700 | -2.53293900 | H  | 1.02448300  | -4.03908200 | 1.44748100  |

|                                                |             |             |             |    |             |             |             |
|------------------------------------------------|-------------|-------------|-------------|----|-------------|-------------|-------------|
| H                                              | 0.99182200  | -3.85042800 | 3.19386900  | H  | -3.54110600 | 1.33246100  | -1.81432800 |
| H                                              | -1.99300900 | -3.73957100 | -0.25680400 | C  | -4.34442400 | -0.67058100 | -1.98630900 |
| <b>IM<sub>6</sub></b>                          |             |             |             | H  | -4.37105100 | -0.52596500 | -3.06784100 |
| Sum of Thermal Correction to Free Energies and |             |             |             | H  | -3.91838700 | -1.66040700 | -1.79441000 |
| Electronic Energy = -2110.862522               |             |             |             | C  | -5.70508600 | -0.54747900 | -1.30462000 |
| Electronic Energy (EE) = -2111.544051          |             |             |             | H  | -6.34496700 | -1.41678000 | -1.47056900 |
| C                                              | -1.26662400 | 0.11504600  | -2.39535900 | H  | -6.24132300 | 0.33388900  | -1.67433600 |
| C                                              | -0.01549000 | -0.54574500 | -2.27244500 | C  | -5.31521600 | -0.35814700 | 0.16102100  |
| C                                              | 0.84378300  | -0.45600600 | -3.37552900 | H  | -6.12335000 | 0.02438000  | 0.78998900  |
| C                                              | 0.49374200  | 0.25267900  | -4.52586300 | H  | -4.99906900 | -1.32403100 | 0.57238300  |
| C                                              | -0.73730700 | 0.88539800  | -4.61035500 | C  | 2.49732000  | -3.27567100 | -1.35532000 |
| C                                              | -1.62831400 | 0.81216400  | -3.53709800 | C  | 3.74909100  | -3.81160000 | -1.59148900 |
| H                                              | 1.81239500  | -0.94580700 | -3.33564300 | C  | 4.86418200  | -3.02710200 | -1.33677500 |
| H                                              | 1.18787900  | 0.30306600  | -5.35928900 | C  | 4.67420200  | -1.73882100 | -0.86334300 |
| H                                              | -1.01688000 | 1.43289700  | -5.50368900 | C  | 3.38824500  | -1.25508400 | -0.64937400 |
| H                                              | -2.59119600 | 1.30463900  | -3.61388100 | N  | 2.30900300  | -2.02874300 | -0.89040300 |
| N                                              | -2.06482500 | 0.02720300  | -1.23347100 | H  | 5.86404400  | -3.40926900 | -1.50610300 |
| C                                              | -1.47743200 | -0.71988100 | -0.24495500 | H  | 1.59481700  | -3.84307700 | -1.54838400 |
| Ir                                             | 0.27587800  | -1.39420700 | -0.54847900 | H  | 3.83739000  | -4.82216200 | -1.96890100 |
| N                                              | -2.20653000 | -0.77751300 | 0.93010500  | H  | 5.51951600  | -1.09465200 | -0.65477400 |
| C                                              | -1.72007800 | -1.58382400 | 1.98398000  | C  | 3.15936000  | 0.15008200  | -0.16417700 |
| C                                              | -1.28563800 | -2.89106300 | 1.72560500  | H  | 4.12375200  | 0.66603000  | -0.15259900 |
| C                                              | -1.68598600 | -1.12037600 | 3.30145700  | H  | 2.52942400  | 0.65025100  | -0.90512500 |
| C                                              | -0.79668200 | -3.68930800 | 2.75085500  | C  | 2.51222200  | 0.27006000  | 1.20761200  |
| H                                              | -1.35577700 | -3.28019600 | 0.71581800  | C  | 2.61168900  | -0.79332300 | 2.10560100  |
| C                                              | -1.23006600 | -1.94016000 | 4.32549700  | C  | 1.84149500  | 1.45091500  | 1.58587800  |
| C                                              | -0.77092100 | -3.22334400 | 4.05977700  | C  | 2.03208700  | -0.73034800 | 3.36528400  |
| H                                              | -0.46303000 | -4.69564100 | 2.52228800  | H  | 3.13551800  | -1.69742200 | 1.81272600  |
| H                                              | -1.21458300 | -1.55757900 | 5.34021600  | C  | 1.26527900  | 1.48268800  | 2.86154600  |
| H                                              | -0.40675800 | -3.85451900 | 4.86219900  | C  | 1.34828600  | 0.41298200  | 3.74390200  |
| C                                              | -3.09617100 | 0.33310600  | 1.25546800  | H  | 2.10320400  | -1.57801100 | 4.03738800  |
| H                                              | -3.66560300 | 0.03117300  | 2.13608000  | H  | 0.72308700  | 2.36556700  | 3.18224500  |
| C                                              | -3.47333300 | 0.38467400  | -1.27506300 | H  | 0.87696800  | 0.47390700  | 4.71836600  |
| C                                              | -4.10892800 | 0.59450600  | 0.13162000  | Si | 1.65953900  | 2.99615600  | 0.48730000  |
| C                                              | -4.44762300 | 2.07625400  | 0.34732400  | C  | 0.49837100  | 2.65849400  | -0.96114700 |
| C                                              | -2.38040700 | 1.68730200  | 1.52906000  | C  | -0.20188900 | 3.88481100  | -1.55782300 |
| H                                              | -1.31106100 | 1.60772500  | 1.32733700  | H  | -0.25019600 | 1.93505800  | -0.62651400 |
| H                                              | -2.49129100 | 1.95977100  | 2.58269900  | H  | 1.04613500  | 2.13604700  | -1.75291100 |
| C                                              | -3.08270400 | 2.71212800  | 0.62328100  | H  | -0.85442500 | 3.58887400  | -2.38524200 |
| H                                              | -3.15587400 | 3.70375200  | 1.07457200  | H  | -0.81982500 | 4.40139100  | -0.81726100 |
| H                                              | -2.52881900 | 2.81930800  | -0.31399600 | H  | 0.51027000  | 4.61621900  | -1.95202300 |
| H                                              | -5.09442300 | 2.17720700  | 1.22710700  | C  | 3.36334000  | 3.56155500  | -0.11257700 |
| H                                              | -4.97380600 | 2.51768400  | -0.50330900 | C  | 3.36317100  | 4.90870400  | -0.84601500 |
|                                                |             |             |             | H  | 3.78585600  | 2.79968600  | -0.77495100 |

|   |             |             |             |   |             |             |             |
|---|-------------|-------------|-------------|---|-------------|-------------|-------------|
| H | 4.03222400  | 3.60755100  | 0.75588200  | H | -1.48568700 | 5.36843000  | 0.60905200  |
| H | 4.37909700  | 5.21930400  | -1.10989600 | H | 1.56966400  | -5.23257100 | 0.66409300  |
| H | 2.79044900  | 4.85398500  | -1.77626300 | H | -0.86667200 | -5.70726400 | 0.67560800  |
| H | 2.92640700  | 5.70765600  | -0.23879600 | H | -2.47292100 | -3.88832600 | 0.24284500  |
| C | 0.94138300  | 4.39729900  | 1.53527000  | H | -2.56502300 | 3.15525500  | 0.66846500  |
| C | 1.85955800  | 4.93963400  | 2.63696800  | H | -5.31624600 | 1.11678200  | 1.22900700  |
| H | -0.02162600 | 4.08200000  | 1.95611200  | H | -3.58529200 | 1.31936800  | 1.54638300  |
| H | 0.69459000  | 5.21136900  | 0.84352000  | H | -4.27959900 | -0.21089600 | 3.32449300  |
| H | 1.37379900  | 5.73642900  | 3.20916900  | H | -5.21397700 | -1.18212600 | 2.18356500  |
| H | 2.15852000  | 4.16158300  | 3.34530800  | H | -3.01347400 | -2.33089500 | 2.26146200  |
| H | 2.77899100  | 5.35744100  | 2.21548700  | H | -2.17477600 | -0.78158000 | 2.18779400  |
| H | -1.98853300 | -0.10736900 | 3.53303300  | H | -5.72172800 | -1.34467700 | -0.51292500 |

### IM<sub>7</sub>

Sum of Thermal Correction to Free Energies and

Electronic Energy = -1584.381768

Electronic Energy (EE) = -1584.892140

|    |             |             |             |   |             |             |             |
|----|-------------|-------------|-------------|---|-------------|-------------|-------------|
| Ir | 0.83179900  | -0.23865000 | -0.56700800 | H | -5.89922400 | 0.34823800  | -0.98819200 |
| N  | -1.78791800 | -1.28844700 | -0.28691700 | H | -5.30552500 | -0.72980800 | -3.10524300 |
| N  | -1.82848000 | 0.99136000  | -0.65107400 | H | -4.10320100 | -1.74252500 | -2.31221600 |
| C  | -1.06178500 | -0.13935400 | -0.50295800 | H | -2.55904500 | -0.07513800 | -2.86739600 |
| C  | -3.11959000 | -1.29406800 | 0.31719600  | H | -3.80759800 | 1.14264600  | -3.10455900 |
| C  | -3.99106400 | -0.05953600 | -0.06506100 | H | 2.38968500  | -2.97305000 | 0.17948600  |
| C  | -3.23608500 | 0.87500900  | -1.01479200 | H | 1.43461600  | 3.86993900  | -2.14841300 |
| C  | -3.07213500 | -1.31759300 | 1.86161200  | H | 0.53919400  | 5.73791100  | -0.77619100 |
| C  | -4.32282100 | -0.55290600 | 2.28794100  | H | 0.29475600  | 1.67024100  | -2.15292700 |
| C  | -4.35913800 | 0.59064100  | 1.27673200  | C | 5.75185500  | -0.59661500 | -1.02510700 |
| C  | -5.18783500 | -0.48400500 | -0.92504500 | C | 5.21816700  | 0.40661700  | -0.23291000 |
| C  | -4.56730200 | -0.75197300 | -2.30110100 | C | 3.83911600  | 0.54144500  | -0.10751500 |
| C  | -3.48098700 | 0.33136700  | -2.44994300 | C | 3.52324600  | -1.27840800 | -1.50614700 |
| C  | -0.94117900 | -2.40436900 | -0.07052700 | C | 4.88249300  | -1.45038500 | -1.68660700 |
| C  | 0.44557800  | -2.09993200 | -0.13204800 | H | 6.82536700  | -0.70646900 | -1.12578200 |
| C  | 1.31986900  | -3.15657900 | 0.15698800  | H | 5.86473000  | 1.09947600  | 0.29160100  |
| C  | 0.85857100  | -4.44228700 | 0.44279200  | H | 2.80563700  | -1.93050700 | -1.98691000 |
| C  | -0.50142800 | -4.70995000 | 0.45585200  | H | 5.24063900  | -2.24701300 | -2.32575800 |
| C  | -1.40945400 | -3.67920600 | 0.20577200  | C | 2.27783700  | 1.34208100  | 1.77326300  |
| C  | -1.19967500 | 2.26130100  | -0.72716700 | C | 1.19775900  | 2.18701000  | 2.02619800  |
| C  | -1.70208700 | 3.31886900  | 0.03319100  | C | 2.43272900  | 0.19543300  | 2.55070300  |
| C  | -1.08523300 | 4.56118400  | 0.00576900  | C | 0.27472600  | 1.87736800  | 3.01624100  |
| C  | 0.05376000  | 4.76886800  | -0.76684300 | C | 1.50794300  | -0.11813000 | 3.53667100  |
| C  | 0.55652500  | 3.72296900  | -1.52902900 | H | 3.25815600  | -0.48157100 | 2.35645300  |
| C  | -0.07537600 | 2.48414500  | -1.52564200 | C | 0.42294400  | 0.71916000  | 3.76954900  |
| H  | -3.62982400 | -2.18934200 | -0.04574200 | H | -0.57216300 | 2.53388600  | 3.18421200  |
| H  | -3.67398100 | 1.87059800  | -0.92702500 | H | 1.62464300  | -1.02992200 | 4.11138600  |
|    |             |             |             | H | -0.30709500 | 0.46509400  | 4.53015600  |
|    |             |             |             | N | 2.99879700  | -0.31733400 | -0.72465500 |
|    |             |             |             | H | 1.05637100  | 3.07439400  | 1.41651500  |
|    |             |             |             | C | 3.26095500  | 1.69480500  | 0.67633800  |
|    |             |             |             | H | 2.76474100  | 2.36815600  | -0.03281900 |

|                                                         |             |             |             |                                                |             |             |             |
|---------------------------------------------------------|-------------|-------------|-------------|------------------------------------------------|-------------|-------------|-------------|
| H                                                       | 4.09411500  | 2.26238100  | 1.10149700  | H                                              | 2.48717900  | 1.41591900  | 2.35595200  |
|                                                         |             |             |             | H                                              | 5.89518600  | 0.80884500  | -0.21711200 |
| <b>TS<sub>5</sub></b>                                   |             |             |             | H                                              | 5.87679000  | -0.92857500 | -0.51084500 |
| Sum of Thermal Correction to Free Energies and          |             |             |             | H                                              | 5.64102700  | -0.24401800 | -2.76799400 |
| Electronic Energy = -1584.362894                        |             |             |             | H                                              | 4.87053700  | 1.27094700  | -2.33837600 |
| Electronic Energy (EE) = -1584.870868                   |             |             |             | H                                              | 2.76295000  | 0.33952000  | -2.52000700 |
| Value of imaginary frequency = -634.22 cm <sup>-1</sup> |             |             |             | H                                              | 3.46450200  | -1.18977200 | -3.03722100 |
| Ir                                                      | -0.87285900 | 0.32806500  | -0.15051000 | H                                              | -2.06052700 | 3.46487100  | 0.07107100  |
| N                                                       | 1.86282900  | 1.19704500  | -0.02546900 | H                                              | -0.71904100 | -3.32589400 | -3.66778300 |
| N                                                       | 1.74431600  | -1.04109600 | -0.54356800 | H                                              | -0.75146100 | -5.37730100 | -2.27554400 |
| C                                                       | 1.07080000  | 0.09198000  | -0.21139700 | H                                              | 0.43009300  | -1.28729400 | -2.83668400 |
| C                                                       | 3.28016300  | 1.18512300  | 0.35555400  | C                                              | -5.60641900 | 1.37151200  | -1.20986100 |
| C                                                       | 3.95897800  | -0.18526900 | 0.11892500  | C                                              | -5.31908900 | 0.25971400  | -0.43980500 |
| C                                                       | 3.16456700  | -1.01280700 | -0.87620300 | C                                              | -3.99740700 | -0.07304500 | -0.15104200 |
| C                                                       | 3.46523200  | 1.48288800  | 1.87218100  | C                                              | -3.26394600 | 1.75904300  | -1.34480400 |
| C                                                       | 4.39696700  | 0.38999400  | 2.40934900  | C                                              | -4.54754700 | 2.12117700  | -1.70017400 |
| C                                                       | 4.08677200  | -0.80449400 | 1.51222800  | H                                              | -6.63229000 | 1.63580400  | -1.43873500 |
| C                                                       | 5.29259200  | -0.00875300 | -0.62041800 | H                                              | -6.11289000 | -0.37746900 | -0.06957100 |
| C                                                       | 4.90558500  | 0.20577900  | -2.09874300 | H                                              | -2.41415400 | 2.32265400  | -1.70129600 |
| C                                                       | 3.50124800  | -0.42280300 | -2.26190700 | H                                              | -4.70198800 | 2.98168600  | -2.33812300 |
| C                                                       | 1.14680500  | 2.41688700  | 0.05396300  | C                                              | -2.62274600 | -1.49635200 | 1.52930300  |
| C                                                       | -0.25472800 | 2.30435900  | -0.08280800 | C                                              | -1.29103500 | -1.14498600 | 1.20621800  |
| C                                                       | -0.97549700 | 3.48985800  | 0.08673000  | C                                              | -2.93205600 | -2.02544800 | 2.77938700  |
| C                                                       | -0.36150700 | 4.72330700  | 0.30914700  | C                                              | -0.29720400 | -1.50821500 | 2.14307900  |
| C                                                       | 1.01926300  | 4.79629000  | 0.37685200  | C                                              | -1.94453600 | -2.29372600 | 3.71712200  |
| C                                                       | 1.78262700  | 3.63651000  | 0.26400200  | H                                              | -3.96883000 | -2.25280400 | 3.01147200  |
| C                                                       | 1.05451800  | -2.20828100 | -1.00847900 | C                                              | -0.61779600 | -2.05171200 | 3.37550700  |
| C                                                       | 1.06074800  | -3.36264400 | -0.23776400 | H                                              | 0.74220700  | -1.32010500 | 1.90736600  |
| C                                                       | 0.40681900  | -4.50132000 | -0.69315300 | H                                              | -2.20298800 | -2.70766000 | 4.68515800  |
| C                                                       | -0.23747200 | -4.48971100 | -1.92385800 | H                                              | 0.17666200  | -2.27746600 | 4.08005600  |
| C                                                       | -0.21942900 | -3.33879400 | -2.70574800 | N                                              | -2.97637900 | 0.70739400  | -0.55318200 |
| C                                                       | 0.42857800  | -2.19901100 | -2.25175500 | H                                              | -1.12383300 | -1.34664800 | -0.18453000 |
| H                                                       | 3.77863800  | 1.94191100  | -0.25450100 | C                                              | -3.69792900 | -1.40378900 | 0.48333200  |
| H                                                       | 3.52009400  | -2.04516900 | -0.82245800 | H                                              | -3.39828400 | -2.05436700 | -0.35295500 |
| H                                                       | 0.39489600  | -5.39480600 | -0.07955600 | H                                              | -4.62998900 | -1.81439100 | 0.87535800  |
| H                                                       | -0.96349200 | 5.61763800  | 0.43397700  |                                                |             |             |             |
| H                                                       | 1.51505700  | 5.74733800  | 0.53974500  | <b>4a</b>                                      |             |             |             |
| H                                                       | 2.85864700  | 3.70920000  | 0.35604600  | Sum of Thermal Correction to Free Energies and |             |             |             |
| H                                                       | 1.55335300  | -3.35712400 | 0.72697600  | Electronic Energy = -1044.990564               |             |             |             |
| H                                                       | 4.84301100  | -1.59315000 | 1.54517100  | Electronic Energy (EE) = -1045.303886          |             |             |             |
| H                                                       | 3.12596400  | -1.24660600 | 1.80262600  | C                                              | -3.33393100 | -1.45468500 | -1.42664600 |
| H                                                       | 4.23098800  | 0.18880400  | 3.46962100  | C                                              | -4.61304900 | -1.51354100 | -0.88715300 |
| H                                                       | 5.44528500  | 0.68325700  | 2.29089600  | C                                              | -4.79404900 | -1.06187600 | 0.41147000  |
| H                                                       | 3.84599000  | 2.48825900  | 2.05687300  | C                                              | -3.69763700 | -0.57216300 | 1.10787400  |

|    |             |             |             |   |            |             |             |
|----|-------------|-------------|-------------|---|------------|-------------|-------------|
| C  | -2.45287700 | -0.54791700 | 0.48207500  | C | 2.66058600 | -2.00698100 | 2.05335600  |
| N  | -2.27820600 | -0.98507100 | -0.76835600 | H | 1.34334500 | -0.33927700 | 2.43652600  |
| H  | -5.77325200 | -1.08864000 | 0.87654000  | H | 3.00098900 | 0.12946800  | 2.19029800  |
| H  | -3.14820300 | -1.80134800 | -2.43957000 | H | 2.85583800 | -2.20424000 | 3.11219200  |
| H  | -5.43742200 | -1.90329400 | -1.47166000 | H | 1.88842800 | -2.71096100 | 1.72758000  |
| H  | -3.80062100 | -0.21183500 | 2.12502400  | H | 3.57399500 | -2.25110500 | 1.50358800  |
| C  | -1.22510500 | -0.01160200 | 1.18204600  | C | 3.48872300 | 0.52547000  | -0.74832700 |
| H  | -1.46846000 | 0.19944700  | 2.22767500  | C | 4.73047500 | -0.31944700 | -0.43190700 |
| H  | -0.47522800 | -0.80279200 | 1.18818800  | H | 3.66861200 | 1.54373000  | -0.38380200 |
| C  | -0.68434800 | 1.24840100  | 0.52611100  | H | 3.36311900 | 0.61272400  | -1.83455900 |
| C  | -1.53487800 | 2.35462900  | 0.48093800  | H | 5.62280500 | 0.09984700  | -0.90726500 |
| C  | 0.60772400  | 1.33321000  | -0.02597600 | H | 4.92432800 | -0.35194000 | 0.64444000  |
| C  | -1.14485900 | 3.54315600  | -0.11618700 | H | 4.63288100 | -1.35078500 | -0.77876000 |
| H  | -2.52803000 | 2.27680200  | 0.91416600  | C | 1.19042600 | -1.55861600 | -0.96435000 |
| C  | 0.97281800  | 2.54470000  | -0.63305300 | C | 2.22401000 | -2.52904000 | -1.54726500 |
| C  | 0.11750100  | 3.63680400  | -0.68564300 | H | 0.57622800 | -1.14677800 | -1.77252500 |
| H  | -1.82478300 | 4.38780900  | -0.14119000 | H | 0.48298700 | -2.11246700 | -0.33770300 |
| H  | 1.95388400  | 2.64454500  | -1.08475800 | H | 1.73380600 | -3.33796000 | -2.09832000 |
| H  | 0.43696400  | 4.55491500  | -1.16656500 | H | 2.89895500 | -2.02496300 | -2.24527000 |
| Si | 1.87057200  | -0.08987300 | 0.01830600  | H | 2.83894100 | -2.99217900 | -0.77009700 |
| C  | 2.22502500  | -0.55467100 | 1.82397800  |   |            |             |             |

## 8. X-ray structural characterization of 2x, 6f, 1bB and 3Db

### 8.1 X-ray ellipsoid plots of 2x

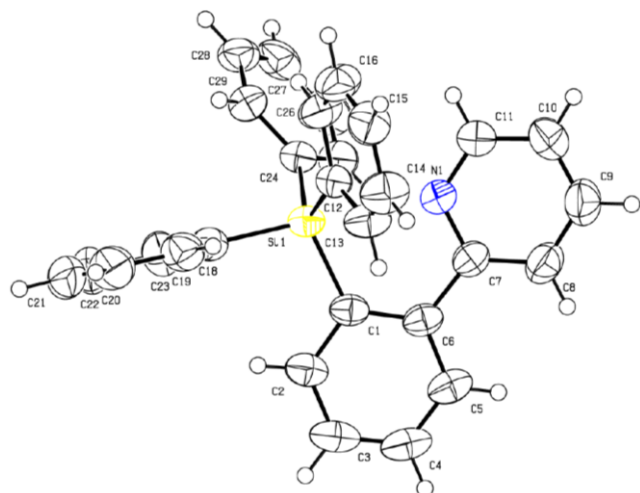

**Table S3: Crystal data and structure refinement for 2x.**

|                                    |                                                               |
|------------------------------------|---------------------------------------------------------------|
| Identification code                | <b>2x</b>                                                     |
| Empirical formula                  | C <sub>29</sub> H <sub>23</sub> NSi                           |
| Formula weight                     | 413.57                                                        |
| Temperature/K                      | 290.73(10)                                                    |
| Crystal system                     | monoclinic                                                    |
| Space group                        | P2 <sub>1</sub> /n                                            |
| a/Å                                | 9.84377(18)                                                   |
| b/Å                                | 16.7777(3)                                                    |
| c/Å                                | 13.6685(2)                                                    |
| α/°                                | 90                                                            |
| β/°                                | 93.7231(17)                                                   |
| γ/°                                | 90                                                            |
| Volume/Å <sup>3</sup>              | 2252.67(7)                                                    |
| Z                                  | 4                                                             |
| ρ <sub>calc</sub> /cm <sup>3</sup> | 1.219                                                         |
| μ/mm <sup>-1</sup>                 | 1.024                                                         |
| F(000)                             | 872.0                                                         |
| Crystal size/mm <sup>3</sup>       | 0.17 × 0.15 × 0.14                                            |
| Radiation                          | CuKα (λ = 1.54184)                                            |
| 2θ range for data collection/°     | 10.436 to 133.164                                             |
| Index ranges                       | -11 ≤ h ≤ 11, -19 ≤ k ≤ 19, -9 ≤ l ≤ 16                       |
| Reflections collected              | 8193                                                          |
| Independent reflections            | 3972 [R <sub>int</sub> = 0.0211, R <sub>sigma</sub> = 0.0264] |
| Data/restraints/parameters         | 3972/0/280                                                    |
| Goodness-of-fit on F <sup>2</sup>  | 1.035                                                         |
| Final R indexes [I ≥ 2σ (I)]       | R <sub>1</sub> = 0.0426, wR <sub>2</sub> = 0.1168             |



Final R indexes [all data]  $R_1 = 0.0495$ ,  $wR_2 = 0.1235$

Largest diff. peak/hole / e  $\text{\AA}^{-3}$  0.26/-0.25

**Table S4: Fractional Atomic Coordinates ( $\times 10^4$ ) and Equivalent Isotropic Displacement Parameters ( $\text{\AA}^2 \times 10^3$ ) for 2x.  $U_{\text{eq}}$  is defined as 1/3 of the trace of the orthogonalised  $U_{ij}$  tensor.**

| Atom | x          | y          | z          | $U_{\text{eq}}$ |
|------|------------|------------|------------|-----------------|
| Si1  | 3518.3(4)  | 2209.3(3)  | 4825.3(3)  | 43.32(15)       |
| N1   | 1420.7(14) | 1444.1(10) | 5326.5(10) | 54.5(4)         |
| C1   | 2702.3(16) | 1746.4(10) | 3660.3(11) | 44.7(4)         |
| C2   | 3342.5(19) | 1837.5(11) | 2783.0(12) | 53.8(4)         |
| C3   | 2792(2)    | 1515.6(13) | 1901.5(13) | 64.2(5)         |
| C4   | 1606(2)    | 1088.3(13) | 1883.0(13) | 66.1(5)         |
| C5   | 946(2)     | 987.6(12)  | 2728.1(13) | 58.6(5)         |
| C6   | 1461.5(16) | 1319.3(10) | 3612.7(12) | 46.2(4)         |
| C7   | 714.4(16)  | 1228.1(10) | 4510.0(12) | 46.6(4)         |
| C8   | -628.7(19) | 961.7(13)  | 4539.2(15) | 64.6(5)         |
| C9   | -1210(2)   | 919.6(14)  | 5422.2(17) | 72.3(6)         |
| C10  | -468(2)    | 1139.2(14) | 6259.4(16) | 68.8(5)         |
| C11  | 839(2)     | 1396.4(14) | 6179.8(14) | 66.4(5)         |
| C12  | 2462.3(17) | 3000.1(10) | 5387.0(11) | 46.1(4)         |
| C13  | 1372(2)    | 3359.3(12) | 4862.3(14) | 61.2(5)         |
| C14  | 639(2)     | 3968.2(13) | 5249.3(16) | 71.1(6)         |
| C15  | 972(2)     | 4233.2(13) | 6185.8(15) | 66.4(5)         |
| C16  | 2013(2)    | 3883.3(15) | 6725.9(15) | 71.5(6)         |
| C17  | 2757.1(19) | 3276.4(13) | 6337.0(13) | 62.2(5)         |
| C18  | 5010.5(18) | 2821.1(11) | 4387.8(12) | 51.0(4)         |
| C19  | 4917(2)    | 3640.9(12) | 4227.9(14) | 63.7(5)         |
| C20  | 6006(3)    | 4078.0(15) | 3917.3(16) | 81.0(7)         |
| C21  | 7212(3)    | 3703.4(17) | 3748.4(17) | 84.2(7)         |
| C22  | 7337(2)    | 2899.2(17) | 3896.0(18) | 80.7(7)         |
| C23  | 6249(2)    | 2467.4(14) | 4215.8(16) | 66.6(5)         |
| C24  | 4411.7(16) | 1509.4(9)  | 5733.3(11) | 43.3(3)         |
| C25  | 4189.4(19) | 693.6(10)  | 5761.0(13) | 54.6(4)         |
| C26  | 4915(2)    | 205.5(12)  | 6426.3(15) | 68.8(5)         |
| C27  | 5874(2)    | 524.3(14)  | 7086.3(14) | 66.8(6)         |
| C28  | 6106.0(19) | 1325.1(13) | 7083.7(13) | 61.1(5)         |
| C29  | 5402.1(17) | 1812.1(11) | 6412.0(12) | 51.1(4)         |

**Table S5: Anisotropic Displacement Parameters ( $\text{\AA}^2 \times 10^3$ ) for 2x. The Anisotropic displacement factor exponent takes the form:  $-2\pi^2[h^2a^{*2}U_{11}+2hka^*b^*U_{12}+\dots]$ .**

| Atom | $U_{11}$  | $U_{22}$  | $U_{33}$ | $U_{23}$  | $U_{13}$  | $U_{12}$  |
|------|-----------|-----------|----------|-----------|-----------|-----------|
| Si1  | 51.0(3)   | 42.3(3)   | 36.3(2)  | 0.98(16)  | -0.34(17) | 2.43(17)  |
| N1   | 50.4(8)   | 69.1(10)  | 43.6(7)  | -3.9(7)   | 0.4(6)    | -7.8(7)   |
| C1   | 51.9(9)   | 44.6(9)   | 37.1(8)  | 1.1(6)    | 0.4(6)    | 10.4(7)   |
| C2   | 60.6(10)  | 60.5(11)  | 40.5(8)  | 2.8(7)    | 4.4(7)    | 13.4(8)   |
| C3   | 80.4(13)  | 76.3(13)  | 35.9(9)  | 0.2(8)    | 3.6(8)    | 26.8(11)  |
| C4   | 78.7(13)  | 74.4(13)  | 42.9(9)  | -11.2(9)  | -14.2(9)  | 20.9(11)  |
| C5   | 62.4(10)  | 62.2(11)  | 48.9(10) | -6.7(8)   | -13.3(8)  | 9.6(9)    |
| C6   | 51.0(9)   | 44.9(9)   | 41.6(8)  | -1.7(7)   | -6.2(6)   | 10.7(7)   |
| C7   | 46.2(8)   | 43.8(8)   | 48.7(9)  | -0.8(7)   | -4.6(7)   | 4.8(7)    |
| C8   | 48.0(9)   | 78.3(13)  | 66.2(12) | -8.3(10)  | -6.9(8)   | -3.2(9)   |
| C9   | 49.9(10)  | 84.9(15)  | 82.9(14) | -5.9(12)  | 10.6(10)  | -8.5(10)  |
| C10  | 64.1(11)  | 78.9(14)  | 65.2(12) | 0.4(10)   | 18.3(9)   | -3.2(10)  |
| C11  | 63.2(11)  | 88.9(15)  | 47.2(10) | -4.9(10)  | 4.7(8)    | -13.5(10) |
| C12  | 50.6(8)   | 47.6(9)   | 40.1(8)  | 0.3(7)    | 3.5(6)    | 0.0(7)    |
| C13  | 73.9(12)  | 63.1(11)  | 45.3(9)  | -1.8(8)   | -6.0(8)   | 14.3(9)   |
| C14  | 73.3(13)  | 70.2(13)  | 68.7(12) | 1.0(10)   | -5.1(10)  | 22.6(10)  |
| C15  | 62.4(11)  | 63.9(12)  | 73.9(13) | -16.2(10) | 13.5(9)   | 7.5(9)    |
| C16  | 67.2(12)  | 91.3(16)  | 55.6(11) | -27.5(11) | 0.5(9)    | 7.2(11)   |
| C17  | 56.8(10)  | 79.0(13)  | 49.5(10) | -14.1(9)  | -6.1(8)   | 10.5(9)   |
| C18  | 58.1(10)  | 52.9(10)  | 41.5(8)  | 4.3(7)    | -0.7(7)   | -4.4(7)   |
| C19  | 79.4(13)  | 55.7(11)  | 55.2(10) | 11.2(8)   | -1.5(9)   | -5.1(9)   |
| C20  | 102.9(18) | 67.5(14)  | 71.0(14) | 20.5(11)  | -6.2(12)  | -24.8(13) |
| C21  | 79.1(15)  | 102.4(19) | 69.5(14) | 22.0(13)  | -7.3(11)  | -38.7(14) |
| C22  | 57.5(12)  | 103.7(19) | 81.2(15) | 13.9(13)  | 7.0(10)   | -9.8(11)  |
| C23  | 59.0(11)  | 67.7(12)  | 73.9(13) | 8.8(10)   | 9.5(9)    | -1.8(9)   |
| C24  | 51.4(9)   | 41.9(8)   | 36.7(7)  | 0.7(6)    | 3.7(6)    | 2.5(7)    |
| C25  | 64.4(10)  | 44.4(9)   | 55.0(10) | -0.6(7)   | 3.5(8)    | -1.6(8)   |
| C26  | 84.2(14)  | 47.1(10)  | 76.9(13) | 18.1(9)   | 17.5(11)  | 9.2(9)    |
| C27  | 63.8(11)  | 81.4(14)  | 56.1(11) | 29.1(10)  | 10.0(9)   | 18.1(10)  |
| C28  | 54.6(10)  | 85.3(14)  | 42.8(9)  | 4.6(9)    | -2.1(7)   | 10.0(9)   |
| C29  | 52.7(9)   | 50.1(10)  | 49.9(9)  | -1.3(7)   | -2.4(7)   | 2.0(7)    |

**Table S6: Bond Lengths for 2x.**

| Atom | Atom | Length/ $\text{\AA}$ | Atom | Atom | Length/ $\text{\AA}$ |
|------|------|----------------------|------|------|----------------------|
| Si1  | C1   | 1.9020(16)           | C12  | C17  | 1.391(2)             |
| Si1  | C12  | 1.8799(17)           | C13  | C14  | 1.376(3)             |

|     |     |            |     |     |          |
|-----|-----|------------|-----|-----|----------|
| Si1 | C18 | 1.9192(18) | C14 | C15 | 1.374(3) |
| Si1 | C24 | 1.8845(16) | C15 | C16 | 1.357(3) |
| N1  | C7  | 1.326(2)   | C16 | C17 | 1.381(3) |
| N1  | C11 | 1.335(2)   | C18 | C19 | 1.395(3) |
| C1  | C2  | 1.399(2)   | C18 | C23 | 1.389(3) |
| C1  | C6  | 1.414(2)   | C19 | C20 | 1.388(3) |
| C2  | C3  | 1.397(3)   | C20 | C21 | 1.376(4) |
| C3  | C4  | 1.369(3)   | C21 | C22 | 1.369(4) |
| C4  | C5  | 1.372(3)   | C22 | C23 | 1.387(3) |
| C5  | C6  | 1.396(2)   | C24 | C25 | 1.387(2) |
| C6  | C7  | 1.478(2)   | C24 | C29 | 1.397(2) |
| C7  | C8  | 1.399(2)   | C25 | C26 | 1.387(3) |
| C8  | C9  | 1.371(3)   | C26 | C27 | 1.371(3) |
| C9  | C10 | 1.368(3)   | C27 | C28 | 1.363(3) |
| C10 | C11 | 1.368(3)   | C28 | C29 | 1.381(2) |
| C12 | C13 | 1.389(2)   |     |     |          |

**Table S7: Bond Angles for 2x.**

| Atom | Atom | Atom | Angle/°    | Atom | Atom | Atom | Angle/°    |
|------|------|------|------------|------|------|------|------------|
| C1   | Si1  | C18  | 104.34(7)  | C13  | C12  | Si1  | 121.63(13) |
| C12  | Si1  | C1   | 114.55(7)  | C13  | C12  | C17  | 116.40(16) |
| C12  | Si1  | C18  | 101.80(8)  | C17  | C12  | Si1  | 121.93(13) |
| C12  | Si1  | C24  | 114.68(7)  | C14  | C13  | C12  | 122.03(17) |
| C24  | Si1  | C1   | 116.78(7)  | C15  | C14  | C13  | 119.94(18) |
| C24  | Si1  | C18  | 101.81(7)  | C16  | C15  | C14  | 119.50(18) |
| C7   | N1   | C11  | 119.19(16) | C15  | C16  | C17  | 120.69(18) |
| C2   | C1   | Si1  | 118.93(13) | C16  | C17  | C12  | 121.42(17) |
| C2   | C1   | C6   | 116.86(15) | C19  | C18  | Si1  | 122.16(15) |
| C6   | C1   | Si1  | 124.20(12) | C23  | C18  | Si1  | 121.46(14) |
| C3   | C2   | C1   | 121.73(18) | C23  | C18  | C19  | 116.39(18) |
| C4   | C3   | C2   | 120.06(18) | C20  | C19  | C18  | 121.6(2)   |
| C3   | C4   | C5   | 119.94(17) | C21  | C20  | C19  | 120.1(2)   |
| C4   | C5   | C6   | 120.96(19) | C22  | C21  | C20  | 119.7(2)   |
| C1   | C6   | C7   | 119.28(14) | C21  | C22  | C23  | 119.8(2)   |
| C5   | C6   | C1   | 120.41(16) | C22  | C23  | C18  | 122.3(2)   |
| C5   | C6   | C7   | 120.31(16) | C25  | C24  | Si1  | 124.41(13) |
| N1   | C7   | C6   | 114.07(14) | C25  | C24  | C29  | 116.44(15) |
| N1   | C7   | C8   | 120.54(17) | C29  | C24  | Si1  | 119.11(12) |
| C8   | C7   | C6   | 125.36(16) | C26  | C25  | C24  | 121.67(18) |

|     |     |     |            |     |     |     |            |
|-----|-----|-----|------------|-----|-----|-----|------------|
| C9  | C8  | C7  | 119.42(18) | C27 | C26 | C25 | 120.29(19) |
| C10 | C9  | C8  | 119.47(18) | C28 | C27 | C26 | 119.42(17) |
| C9  | C10 | C11 | 118.19(19) | C27 | C28 | C29 | 120.53(18) |
| N1  | C11 | C10 | 123.19(18) | C28 | C29 | C24 | 121.64(17) |

**Table S8: Torsion Angles for 2x.**

| A   | B   | C   | D   | Angle/°     | A   | B   | C   | D   | Angle/°     |
|-----|-----|-----|-----|-------------|-----|-----|-----|-----|-------------|
| Si1 | C1  | C2  | C3  | -179.67(14) | C9  | C10 | C11 | N1  | 0.1(4)      |
| Si1 | C1  | C6  | C5  | -178.96(12) | C11 | N1  | C7  | C6  | 179.14(17)  |
| Si1 | C1  | C6  | C7  | 1.1(2)      | C11 | N1  | C7  | C8  | 0.7(3)      |
| Si1 | C12 | C13 | C14 | -176.45(17) | C12 | Si1 | C24 | C25 | 118.43(15)  |
| Si1 | C12 | C17 | C16 | 176.96(17)  | C12 | Si1 | C24 | C29 | -63.80(15)  |
| Si1 | C18 | C19 | C20 | 179.59(15)  | C12 | C13 | C14 | C15 | -0.6(4)     |
| Si1 | C18 | C23 | C22 | 179.75(17)  | C13 | C12 | C17 | C16 | -0.9(3)     |
| Si1 | C24 | C25 | C26 | 177.67(14)  | C13 | C14 | C15 | C16 | -0.8(4)     |
| Si1 | C24 | C29 | C28 | -178.89(13) | C14 | C15 | C16 | C17 | 1.3(4)      |
| N1  | C7  | C8  | C9  | -0.5(3)     | C15 | C16 | C17 | C12 | -0.5(4)     |
| C1  | Si1 | C12 | C13 | -16.35(18)  | C17 | C12 | C13 | C14 | 1.4(3)      |
| C1  | Si1 | C12 | C17 | 165.88(15)  | C18 | Si1 | C12 | C13 | 95.59(16)   |
| C1  | Si1 | C24 | C25 | -19.66(17)  | C18 | Si1 | C12 | C17 | -82.18(17)  |
| C1  | Si1 | C24 | C29 | 158.11(12)  | C18 | Si1 | C24 | C25 | -132.54(15) |
| C1  | C2  | C3  | C4  | -1.0(3)     | C18 | Si1 | C24 | C29 | 45.22(14)   |
| C1  | C6  | C7  | N1  | -11.4(2)    | C18 | C19 | C20 | C21 | 0.7(3)      |
| C1  | C6  | C7  | C8  | 166.95(17)  | C19 | C18 | C23 | C22 | -0.4(3)     |
| C2  | C1  | C6  | C5  | 2.0(2)      | C19 | C20 | C21 | C22 | -0.5(4)     |
| C2  | C1  | C6  | C7  | -177.89(14) | C20 | C21 | C22 | C23 | -0.1(4)     |
| C2  | C3  | C4  | C5  | 1.1(3)      | C21 | C22 | C23 | C18 | 0.6(4)      |
| C3  | C4  | C5  | C6  | 0.3(3)      | C23 | C18 | C19 | C20 | -0.2(3)     |
| C4  | C5  | C6  | C1  | -2.0(3)     | C24 | Si1 | C12 | C13 | -155.39(15) |
| C4  | C5  | C6  | C7  | 177.97(16)  | C24 | Si1 | C12 | C17 | 26.85(19)   |
| C5  | C6  | C7  | N1  | 168.66(16)  | C24 | C25 | C26 | C27 | 0.6(3)      |
| C5  | C6  | C7  | C8  | -13.0(3)    | C25 | C24 | C29 | C28 | -0.9(2)     |
| C6  | C1  | C2  | C3  | -0.6(2)     | C25 | C26 | C27 | C28 | 0.1(3)      |
| C6  | C7  | C8  | C9  | -178.71(18) | C26 | C27 | C28 | C29 | -1.2(3)     |
| C7  | N1  | C11 | C10 | -0.5(3)     | C27 | C28 | C29 | C24 | 1.6(3)      |
| C7  | C8  | C9  | C10 | 0.0(3)      | C29 | C24 | C25 | C26 | -0.1(3)     |
| C8  | C9  | C10 | C11 | 0.1(3)      |     |     |     |     |             |

**Table S9: Hydrogen Atom Coordinates ( $\text{\AA}\times 10^4$ ) and Isotropic Displacement Parameters ( $\text{\AA}^2\times 10^3$ ) for 2x.**

| Atom | <i>x</i> | <i>y</i> | <i>z</i> | U(eq) |
|------|----------|----------|----------|-------|
| H2   | 4155.89  | 2119.71  | 2786.56  | 65    |
| H3   | 3231.6   | 1591.75  | 1326.76  | 77    |
| H4   | 1248.49  | 866.29   | 1298.3   | 79    |
| H5   | 142.98   | 694.26   | 2711.4   | 70    |
| H8   | -1122.88 | 814.4    | 3964.58  | 78    |
| H9   | -2102.37 | 743.16   | 5451.6   | 87    |
| H10  | -842.03  | 1114.33  | 6866.35  | 83    |
| H11  | 1347.1   | 1545.22  | 6747.89  | 80    |
| H13  | 1130.13  | 3182.83  | 4229.88  | 73    |
| H14  | -80.53   | 4200.1   | 4877.57  | 85    |
| H15  | 486.93   | 4649.18  | 6447.45  | 80    |
| H16  | 2227.67  | 4054.08  | 7364.61  | 86    |
| H17  | 3470.66  | 3047.39  | 6718.09  | 75    |
| H19  | 4104.9   | 3901.07  | 4332.14  | 76    |
| H20  | 5920.21  | 4625.12  | 3823.03  | 97    |
| H21  | 7939.74  | 3995.44  | 3535.05  | 101   |
| H22  | 8149.52  | 2642.78  | 3782.02  | 97    |
| H23  | 6351.71  | 1922.17  | 4318.79  | 80    |
| H25  | 3537.02  | 468.15   | 5322.4   | 66    |
| H26  | 4751.16  | -340.35  | 6424.62  | 83    |
| H27  | 6361.33  | 196.94   | 7531.91  | 80    |
| H28  | 6743.36  | 1545.36  | 7537.79  | 73    |
| H29  | 5592.25  | 2355.1   | 6411.62  | 61    |

## 8.2 X-ray ellipsoid plots of 6f (CCDC 2068360)

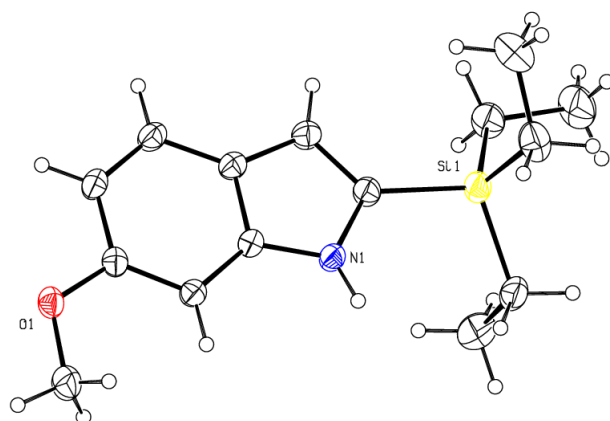

**Table S10: Crystal data and structure refinement for 6f.**

|                     |           |
|---------------------|-----------|
| Identification code | <b>6f</b> |
|---------------------|-----------|

|                                             |                                                               |
|---------------------------------------------|---------------------------------------------------------------|
| Empirical formula                           | C <sub>15</sub> H <sub>23</sub> NOSi                          |
| Formula weight                              | 261.43                                                        |
| Temperature/K                               | 149.96(10)                                                    |
| Crystal system                              | tetragonal                                                    |
| Space group                                 | I4 <sub>1</sub> /a                                            |
| a/Å                                         | 17.07243(19)                                                  |
| b/Å                                         | 17.07243(19)                                                  |
| c/Å                                         | 21.9046(4)                                                    |
| α/°                                         | 90                                                            |
| β/°                                         | 90                                                            |
| γ/°                                         | 90                                                            |
| Volume/Å <sup>3</sup>                       | 6384.49(18)                                                   |
| Z                                           | 16                                                            |
| ρ <sub>calc</sub> /cm <sup>3</sup>          | 1.088                                                         |
| μ/mm <sup>-1</sup>                          | 1.206                                                         |
| F(000)                                      | 2272.0                                                        |
| Crystal size/mm <sup>3</sup>                | 0.12 × 0.09 × 0.07                                            |
| Radiation                                   | CuKα (λ = 1.54184)                                            |
| 2θ range for data collection/°              | 6.564 to 152.462                                              |
| Index ranges                                | -19 ≤ h ≤ 14, -21 ≤ k ≤ 21, -21 ≤ l ≤ 26                      |
| Reflections collected                       | 9382                                                          |
| Independent reflections                     | 3209 [R <sub>int</sub> = 0.0359, R <sub>sigma</sub> = 0.0346] |
| Data/restraints/parameters                  | 3209/0/167                                                    |
| Goodness-of-fit on F <sup>2</sup>           | 1.083                                                         |
| Final R indexes [I ≥ 2σ (I)]                | R <sub>1</sub> = 0.0480, wR <sub>2</sub> = 0.1321             |
| Final R indexes [all data]                  | R <sub>1</sub> = 0.0518, wR <sub>2</sub> = 0.1356             |
| Largest diff. peak/hole / e Å <sup>-3</sup> | 0.31/-0.29                                                    |

**Table S11: Fractional Atomic Coordinates ( $\times 10^4$ ) and Equivalent Isotropic Displacement Parameters ( $\text{\AA}^2 \times 10^3$ ) for 6f.  $U_{eq}$  is defined as 1/3 of the trace of the orthogonalised  $U_{ij}$  tensor.**

| Atom | x         | y         | z          | U(eq)     |
|------|-----------|-----------|------------|-----------|
| Si1  | 8043.8(3) | 6799.8(3) | 1120.2(2)  | 42.48(17) |
| O1   | 8892.9(6) | 6292.2(6) | -2320.5(5) | 40.0(3)   |
| N1   | 8338.7(8) | 6913.4(7) | -170.3(6)  | 37.5(3)   |
| C1   | 8481.4(8) | 6477.4(8) | -684.7(7)  | 34.4(3)   |
| C2   | 8612.8(9) | 6727.3(9) | -1284.0(7) | 35.5(3)   |
| C3   | 8744.3(8) | 6147.1(9) | -1711.8(7) | 35.3(3)   |
| C4   | 8745.4(9) | 5347.8(9) | -1552.9(7) | 39.0(3)   |
| C5   | 8604.3(9) | 5114.0(9) | -963.9(8)  | 41.2(4)   |

|     |            |            |            |         |
|-----|------------|------------|------------|---------|
| C6  | 8467.5(9)  | 5683.1(9)  | -511.3(7)  | 37.3(3) |
| C7  | 8300.1(10) | 5666.6(9)  | 127.4(7)   | 42.9(4) |
| C8  | 8225.6(10) | 6422.4(9)  | 331.0(7)   | 39.6(3) |
| C9  | 8861.5(13) | 7086.3(11) | -2515.1(8) | 54.7(5) |
| C10 | 7481.6(14) | 7738.3(11) | 1060.5(8)  | 56.8(5) |
| C11 | 6647.2(17) | 7633.5(16) | 820.5(13)  | 81.7(7) |
| C12 | 7480.9(13) | 6040.7(11) | 1545.0(9)  | 55.9(5) |
| C13 | 7333.9(17) | 6252.4(16) | 2216.9(10) | 76.6(7) |
| C14 | 9008.4(13) | 6966.3(13) | 1501.5(9)  | 61.4(5) |
| C15 | 9475.7(15) | 6220.8(16) | 1617.8(11) | 74.0(6) |

**Table S12: Anisotropic Displacement Parameters ( $\text{\AA}^2 \times 10^3$ ) for 6f. The Anisotropic displacement factor exponent takes the form:  $-2\pi^2[h^2a^{*2}U_{11}+2hka^*b^*U_{12}+\dots]$ .**

| Atom | U <sub>11</sub> | U <sub>22</sub> | U <sub>33</sub> | U <sub>23</sub> | U <sub>13</sub> | U <sub>12</sub> |
|------|-----------------|-----------------|-----------------|-----------------|-----------------|-----------------|
| Si1  | 57.7(3)         | 37.5(2)         | 32.2(3)         | 0.53(16)        | 7.95(18)        | -6.46(18)       |
| O1   | 39.1(6)         | 48.2(6)         | 32.7(5)         | -6.5(4)         | 1.6(4)          | 4.2(4)          |
| N1   | 50.7(7)         | 29.3(6)         | 32.6(6)         | -0.6(5)         | 5.8(5)          | -0.4(5)         |
| C1   | 35.9(7)         | 33.1(7)         | 34.3(7)         | -3.9(5)         | 1.3(6)          | 0.6(5)          |
| C2   | 37.7(7)         | 33.2(7)         | 35.7(7)         | -1.4(6)         | 1.3(6)          | 1.7(5)          |
| C3   | 28.4(6)         | 43.4(8)         | 34.0(7)         | -5.9(6)         | -1.4(5)         | 2.3(5)          |
| C4   | 35.6(7)         | 38.3(8)         | 43.2(8)         | -12.3(6)        | -2.9(6)         | 3.1(6)          |
| C5   | 44.5(8)         | 31.4(7)         | 47.6(9)         | -5.2(6)         | -2.4(7)         | 0.0(6)          |
| C6   | 39.5(7)         | 31.9(7)         | 40.4(8)         | -1.6(6)         | -0.2(6)         | -0.5(5)         |
| C7   | 55.4(9)         | 32.4(7)         | 40.8(8)         | 2.7(6)          | 2.6(7)          | -3.5(6)         |
| C8   | 48.9(8)         | 35.8(7)         | 34.2(7)         | 1.2(6)          | 5.3(6)          | -3.5(6)         |
| C9   | 73.8(13)        | 52.7(10)        | 37.4(9)         | -0.4(7)         | 10.2(8)         | -0.2(9)         |
| C10  | 88.1(14)        | 41.5(9)         | 40.9(9)         | -5.8(7)         | 13.0(9)         | 3.1(9)          |
| C11  | 93.1(18)        | 71.5(15)        | 80.6(16)        | -9.4(12)        | -5.1(14)        | 27.8(13)        |
| C12  | 71.0(12)        | 51.0(10)        | 45.8(10)        | 5.7(8)          | 13.2(9)         | -9.7(9)         |
| C13  | 97.9(18)        | 83.8(16)        | 48.2(11)        | 11.3(11)        | 24.6(11)        | -15.0(13)       |
| C14  | 70.4(13)        | 68.1(12)        | 45.6(10)        | -1.6(9)         | 1.7(9)          | -17.0(10)       |
| C15  | 74.6(15)        | 90.6(17)        | 56.8(12)        | 13.5(11)        | -8.5(10)        | -2.4(12)        |

**Table S13: Bond Lengths for 6f.**

| Atom | Atom | Length/ $\text{\AA}$ | Atom | Atom | Length/ $\text{\AA}$ |
|------|------|----------------------|------|------|----------------------|
| Si1  | C8   | 1.8708(16)           | C2   | C3   | 1.382(2)             |
| Si1  | C10  | 1.872(2)             | C3   | C4   | 1.408(2)             |

|     |     |            |     |     |          |
|-----|-----|------------|-----|-----|----------|
| Si1 | C12 | 1.8626(18) | C4  | C5  | 1.372(2) |
| Si1 | C14 | 1.868(2)   | C5  | C6  | 1.408(2) |
| O1  | C3  | 1.3796(18) | C6  | C7  | 1.428(2) |
| O1  | C9  | 1.422(2)   | C7  | C8  | 1.371(2) |
| N1  | C1  | 1.3723(19) | C10 | C11 | 1.529(4) |
| N1  | C8  | 1.3948(19) | C12 | C13 | 1.536(3) |
| C1  | C2  | 1.398(2)   | C14 | C15 | 1.524(3) |
| C1  | C6  | 1.408(2)   |     |     |          |

**Table S14: Bond Angles for 6f.**

| Atom Atom Atom | Angle/°    | Atom Atom Atom | Angle/°    |
|----------------|------------|----------------|------------|
| C8 Si1 C10     | 108.38(8)  | C2 C3 C4       | 121.81(14) |
| C12 Si1 C8     | 107.91(8)  | C5 C4 C3       | 120.95(14) |
| C12 Si1 C10    | 111.46(10) | C4 C5 C6       | 119.38(14) |
| C12 Si1 C14    | 109.71(10) | C1 C6 C7       | 106.65(13) |
| C14 Si1 C8     | 108.62(9)  | C5 C6 C1       | 118.16(14) |
| C14 Si1 C10    | 110.67(10) | C5 C6 C7       | 135.19(15) |
| C3 O1 C9       | 117.00(12) | C8 C7 C6       | 108.58(13) |
| C1 N1 C8       | 110.18(12) | N1 C8 Si1      | 122.91(11) |
| N1 C1 C2       | 129.33(13) | C7 C8 Si1      | 129.80(12) |
| N1 C1 C6       | 107.33(13) | C7 C8 N1       | 107.26(13) |
| C2 C1 C6       | 123.34(13) | C11 C10 Si1    | 113.67(15) |
| C3 C2 C1       | 116.36(14) | C13 C12 Si1    | 113.53(15) |
| O1 C3 C2       | 123.82(14) | C15 C14 Si1    | 114.16(16) |
| O1 C3 C4       | 114.37(13) |                |            |

**Table S15: Hydrogen Atom Coordinates ( $\text{\AA} \times 10^4$ ) and Isotropic Displacement Parameters ( $\text{\AA}^2 \times 10^3$ ) for 6f.**

| Atom | x       | y       | z        | U(eq) |
|------|---------|---------|----------|-------|
| H2   | 8321.54 | 7416.64 | -158.61  | 45    |
| H4   | 8611.72 | 7255.13 | -1388.93 | 43    |
| H7   | 8843.19 | 4973.19 | -1851.54 | 47    |
| H6   | 8599.12 | 4584.36 | -864.6   | 49    |
| H10  | 8249.97 | 5218.29 | 365.32   | 51    |
| H12A | 8972.38 | 7114.08 | -2944.23 | 82    |
| H12B | 9242.83 | 7387.1  | -2294.24 | 82    |
| H12C | 8348.24 | 7293.61 | -2438.28 | 82    |



|      |         |         |         |     |
|------|---------|---------|---------|-----|
| H11A | 7458.58 | 7980.61 | 1460.67 | 68  |
| H11B | 7761.51 | 8092.05 | 791.28  | 68  |
| H16A | 6662.81 | 7377.64 | 430.46  | 123 |
| H16B | 6402.85 | 8137.02 | 778.09  | 123 |
| H16C | 6351.92 | 7320.03 | 1102.37 | 123 |
| H14A | 6980.67 | 5962.52 | 1344.1  | 67  |
| H14B | 7765.55 | 5549.48 | 1527.51 | 67  |
| H15A | 7038.7  | 6730.21 | 2238.61 | 115 |
| H15B | 7826.32 | 6320.74 | 2421.7  | 115 |
| H15C | 7044.88 | 5838.75 | 2410.13 | 115 |
| H13A | 9319.32 | 7314.63 | 1249.25 | 74  |
| H13B | 8918.31 | 7227.38 | 1888.51 | 74  |
| H17A | 9534.06 | 5936.55 | 1242.39 | 111 |
| H17B | 9204.17 | 5901.09 | 1909.72 | 111 |
| H17C | 9983.41 | 6354.87 | 1774.59 | 111 |

### 8.3 X-ray ellipsoid plots of 1bB (CCDC 2054626)

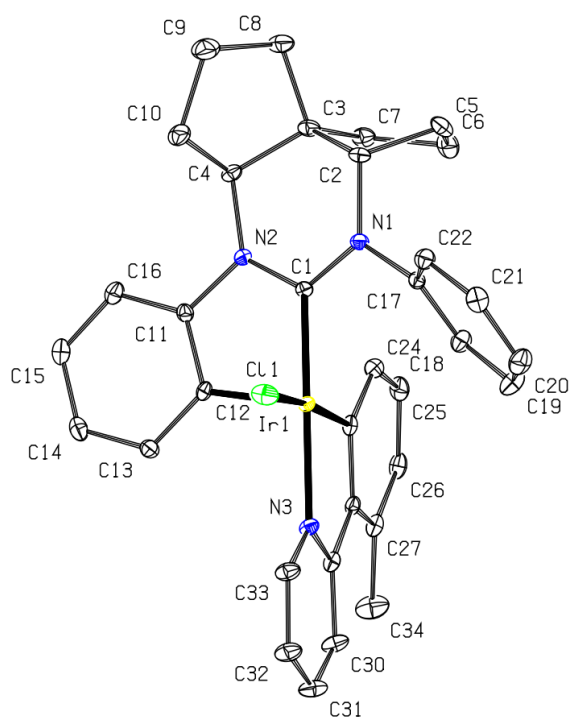

**Table S16: Crystal data and structure refinement for 1bB.**

|                     |                       |
|---------------------|-----------------------|
| Identification code | <b>1bB</b>            |
| Empirical formula   | $C_{34}H_{33}ClIrN_3$ |
| Formula weight      | 711.28                |
| Temperature/K       | 173.00(10)            |

|                                             |                                                               |
|---------------------------------------------|---------------------------------------------------------------|
| Crystal system                              | monoclinic                                                    |
| Space group                                 | P2 <sub>1</sub> /n                                            |
| a/Å                                         | 15.6492(2)                                                    |
| b/Å                                         | 11.05361(16)                                                  |
| c/Å                                         | 16.4956(2)                                                    |
| α/°                                         | 90                                                            |
| β/°                                         | 102.7731(15)                                                  |
| γ/°                                         | 90                                                            |
| Volume/Å <sup>3</sup>                       | 2782.80(7)                                                    |
| Z                                           | 4                                                             |
| ρ <sub>calc</sub> /cm <sup>3</sup>          | 1.698                                                         |
| μ/mm <sup>-1</sup>                          | 10.383                                                        |
| F(000)                                      | 1408.0                                                        |
| Crystal size/mm <sup>3</sup>                | 0.07 × 0.02 × 0.01                                            |
| Radiation                                   | CuKα (λ = 1.54184)                                            |
| 2θ range for data collection/°              | 7.048 to 133.178                                              |
| Index ranges                                | -16 ≤ h ≤ 18, -13 ≤ k ≤ 8, -19 ≤ l ≤ 19                       |
| Reflections collected                       | 10206                                                         |
| Independent reflections                     | 4916 [R <sub>int</sub> = 0.0184, R <sub>sigma</sub> = 0.0239] |
| Data/restraints/parameters                  | 4916/0/353                                                    |
| Goodness-of-fit on F <sup>2</sup>           | 1.049                                                         |
| Final R indexes [I ≥ 2σ (I)]                | R <sub>1</sub> = 0.0188, wR <sub>2</sub> = 0.0470             |
| Final R indexes [all data]                  | R <sub>1</sub> = 0.0202, wR <sub>2</sub> = 0.0480             |
| Largest diff. peak/hole / e Å <sup>-3</sup> | 0.53/-0.66                                                    |

**Table S17: Fractional Atomic Coordinates ( $\times 10^4$ ) and Equivalent Isotropic Displacement Parameters ( $\text{\AA}^2 \times 10^3$ ) for 1bB.  $U_{\text{eq}}$  is defined as 1/3 of the trace of the orthogonalised  $U_{\text{ij}}$  tensor.**

| Atom | x           | y          | z          | U(eq)     |
|------|-------------|------------|------------|-----------|
| Ir1  | 125.8(2)    | 3833.5(2)  | 2308.8(2)  | 12.21(5)  |
| Cl1  | 657.8(4)    | 3474.4(6)  | 1051.1(4)  | 25.03(14) |
| N1   | -8.0(14)    | 6395(2)    | 2129.9(14) | 15.5(4)   |
| N2   | -1168.3(13) | 5412(2)    | 1260.5(12) | 15.3(4)   |
| N3   | 699.5(14)   | 2260.7(19) | 2908.0(13) | 16.3(4)   |
| C1   | 1027.4(16)  | 4983(2)    | 2864.6(15) | 14.7(5)   |
| C2   | 1833.4(16)  | 4732(3)    | 3398.1(16) | 19.5(5)   |
| C3   | 2403.2(17)  | 5664(3)    | 3725.3(16) | 22.9(6)   |
| C4   | 2184.1(17)  | 6856(3)    | 3532.6(17) | 23.4(6)   |
| C5   | 1386.2(18)  | 7131(3)    | 3002.0(16) | 21.6(6)   |
| C6   | 816.3(17)   | 6206(2)    | 2681.6(16) | 15.4(5)   |

|     |             |         |            |         |
|-----|-------------|---------|------------|---------|
| C7  | -316.5(17)  | 7592(2) | 1834.5(16) | 17.8(5) |
| C8  | 95.9(18)    | 8083(3) | 1134.9(18) | 26.1(6) |
| C9  | -582(2)     | 8969(3) | 646(2)     | 37.7(8) |
| C10 | -1419(2)    | 8802(2) | 983.6(19)  | 27.0(6) |
| C11 | -1303.9(17) | 7611(2) | 1471.5(15) | 18.6(5) |
| C12 | -1890.9(17) | 7522(2) | 2112.0(16) | 21.8(6) |
| C13 | -2657.3(18) | 6670(3) | 1739.6(18) | 27.9(6) |
| C14 | -2581.8(17) | 6456(3) | 839.9(17)  | 24.4(6) |
| C15 | -1597.3(16) | 6535(2) | 883.3(15)  | 17.2(5) |
| C16 | -419.8(15)  | 5355(2) | 1847.3(14) | 12.5(5) |
| C17 | -1497.3(15) | 4259(2) | 916.5(15)  | 15.3(5) |
| C18 | -1680.8(17) | 3363(3) | 1447.3(16) | 22.1(6) |
| C19 | -1932(2)    | 2217(3) | 1124.6(18) | 30.1(7) |
| C20 | -2022.8(19) | 1992(3) | 283.5(19)  | 28.9(6) |
| C21 | -1860.6(18) | 2906(3) | -232.2(17) | 24.4(6) |
| C22 | -1588.0(17) | 4039(3) | 76.5(16)   | 20.7(5) |
| C23 | -330.3(16)  | 3869(2) | 3359.5(15) | 14.9(5) |
| C24 | -912.8(16)  | 4722(2) | 3546.4(16) | 19.9(5) |
| C25 | -1153.7(17) | 4709(3) | 4307.9(17) | 22.1(6) |
| C26 | -792.1(18)  | 3872(2) | 4904.0(17) | 21.8(6) |
| C27 | -209.3(17)  | 2994(2) | 4755.8(16) | 19.5(5) |
| C28 | 5.1(16)     | 2966(2) | 3967.4(15) | 15.4(5) |
| C29 | 561.4(16)   | 2048(2) | 3687.2(15) | 16.8(5) |
| C30 | 923(2)      | 1010(2) | 4110.7(18) | 24.9(6) |
| C31 | 1438(2)     | 234(3)  | 3765.3(18) | 28.2(6) |
| C32 | 1587.7(19)  | 487(3)  | 2990.6(18) | 26.4(6) |
| C33 | 1202.5(19)  | 1500(3) | 2582.1(17) | 22.4(6) |
| C34 | 173(2)      | 2173(3) | 5479.3(17) | 35.1(7) |

**Table S18: Anisotropic Displacement Parameters ( $\text{\AA}^2 \times 10^3$ ) for 1bB. The Anisotropic displacement factor exponent takes the form:  $-2\pi^2 [h^2 a^{*2} U_{11} + 2hka^*b^* U_{12} + \dots]$ .**

| Atom | $U_{11}$ | $U_{22}$ | $U_{33}$ | $U_{23}$ | $U_{13}$ | $U_{12}$ |
|------|----------|----------|----------|----------|----------|----------|
| Ir1  | 13.94(7) | 10.36(7) | 13.31(7) | 0.93(4)  | 5.14(4)  | 0.73(4)  |
| Cl1  | 29.3(3)  | 30.6(4)  | 19.0(3)  | 5.2(3)   | 13.7(3)  | 11.0(3)  |
| N1   | 15.2(10) | 12.3(11) | 19.2(10) | 1.7(9)   | 3.9(8)   | 0.2(8)   |
| N2   | 15.7(10) | 13.6(11) | 16.5(10) | 1.7(8)   | 3.6(8)   | 2.1(8)   |
| N3   | 20.0(10) | 12.0(10) | 18.4(10) | 0.9(8)   | 7.0(8)   | 1.2(9)   |
| C1   | 15.3(11) | 15.4(12) | 15.2(11) | 0.0(10)  | 7.4(9)   | -3.0(10) |
| C2   | 15.8(12) | 22.4(14) | 20.6(13) | 5.8(11)  | 4.8(10)  | 1.9(10)  |

|     |          |          |          |          |          |          |
|-----|----------|----------|----------|----------|----------|----------|
| C3  | 15.9(12) | 34.1(17) | 18.1(12) | 1.6(12)  | 2.5(10)  | -2.7(12) |
| C4  | 20.1(13) | 27.5(15) | 23.6(13) | -5.5(11) | 7.1(11)  | -7.3(11) |
| C5  | 23.6(13) | 17.9(14) | 24.1(13) | -3.3(11) | 7.2(11)  | -4.4(11) |
| C6  | 13.2(12) | 17.0(14) | 16.9(12) | -0.6(9)  | 5.1(10)  | 0.8(9)   |
| C7  | 22.4(13) | 11.3(12) | 20.7(12) | 0.5(10)  | 7.2(10)  | 0.8(10)  |
| C8  | 25.9(14) | 24.6(15) | 31.9(15) | 8.6(12)  | 14.8(12) | 1.2(12)  |
| C9  | 37.6(18) | 33.6(18) | 44.7(19) | 19.1(15) | 15.3(15) | 6.9(14)  |
| C10 | 32.1(16) | 19.4(15) | 30.4(15) | 6.0(11)  | 9.2(13)  | 8.6(11)  |
| C11 | 21.1(13) | 16.3(13) | 19.5(12) | 1.5(11)  | 7.2(10)  | 6.5(10)  |
| C12 | 24.5(13) | 18.9(14) | 23.9(13) | -0.7(11) | 9.3(11)  | 6.1(11)  |
| C13 | 20.3(13) | 33.8(17) | 32.6(15) | -4.0(13) | 12.3(12) | 2.7(13)  |
| C14 | 17.0(13) | 26.7(15) | 26.7(14) | -0.8(12) | -0.9(11) | 6.3(11)  |
| C15 | 20.1(12) | 15.4(13) | 16.2(12) | 3.0(10)  | 4.1(10)  | 6.5(11)  |
| C16 | 13.2(11) | 12.3(12) | 14.3(11) | 0.1(9)   | 7.8(9)   | 3.2(9)   |
| C17 | 12.7(11) | 13.1(12) | 20.2(12) | -1.3(10) | 3.8(9)   | 0.6(10)  |
| C18 | 24.6(13) | 21.9(15) | 20.6(13) | -0.2(11) | 6.9(11)  | -3.0(11) |
| C19 | 41.2(17) | 20.6(15) | 30.6(15) | 0.2(12)  | 12.2(13) | -7.7(13) |
| C20 | 33.9(15) | 20.5(15) | 32.8(15) | -8.8(12) | 8.6(13)  | -5.6(12) |
| C21 | 24.4(13) | 29.2(16) | 20.4(13) | -7.4(11) | 7.0(11)  | -0.9(12) |
| C22 | 21.2(13) | 22.0(14) | 20.1(13) | 1.7(11)  | 6.8(11)  | 0.0(11)  |
| C23 | 13.8(12) | 16.8(13) | 14.8(12) | -2.7(9)  | 5.2(10)  | -4.1(9)  |
| C24 | 18.9(12) | 18.2(13) | 23.0(13) | 1.3(11)  | 5.3(10)  | 0.0(10)  |
| C25 | 18.3(12) | 24.5(14) | 26.6(14) | -5.2(11) | 11.7(10) | -0.6(11) |
| C26 | 21.4(13) | 27.5(16) | 20.5(13) | -4.3(11) | 13.0(11) | -7.6(11) |
| C27 | 20.5(12) | 19.3(13) | 19.7(13) | -1.6(10) | 6.5(10)  | -6.5(10) |
| C28 | 14.9(11) | 12.4(12) | 19.1(12) | -2.4(10) | 4.5(9)   | -4.0(9)  |
| C29 | 18.1(12) | 16.0(13) | 16.6(12) | -1.4(10) | 4.8(10)  | -4.4(10) |
| C30 | 38.8(16) | 17.0(14) | 20.2(13) | 6.3(11)  | 9.1(12)  | 3.2(12)  |
| C31 | 40.4(17) | 15.7(14) | 27.3(14) | 4.0(11)  | 4.6(13)  | 7.6(12)  |
| C32 | 35.7(16) | 15.7(14) | 30.0(15) | 1.1(12)  | 12.2(13) | 7.7(12)  |
| C33 | 29.9(14) | 17.1(13) | 23.7(13) | 3.3(11)  | 13.7(11) | 6.4(12)  |
| C34 | 55(2)    | 33.1(18) | 22.5(14) | 6.4(13)  | 19.7(14) | 9.1(16)  |

**Table S19: Bond Lengths for 1bB.**

| Atom | Atom | Length/Å  | Atom | Atom | Length/Å |
|------|------|-----------|------|------|----------|
| Ir1  | C11  | 2.4329(6) | C11  | C12  | 1.549(3) |
| Ir1  | N3   | 2.101(2)  | C11  | C15  | 1.540(4) |
| Ir1  | C1   | 1.968(2)  | C12  | C13  | 1.542(4) |
| Ir1  | C16  | 1.962(2)  | C13  | C14  | 1.533(4) |

|     |     |          |     |     |          |
|-----|-----|----------|-----|-----|----------|
| Ir1 | C23 | 2.015(2) | C14 | C15 | 1.529(4) |
| N1  | C6  | 1.420(3) | C17 | C18 | 1.394(4) |
| N1  | C7  | 1.455(3) | C17 | C22 | 1.383(4) |
| N1  | C16 | 1.350(3) | C18 | C19 | 1.396(4) |
| N2  | C15 | 1.481(3) | C19 | C20 | 1.385(4) |
| N2  | C16 | 1.346(3) | C20 | C21 | 1.380(4) |
| N2  | C17 | 1.442(3) | C21 | C22 | 1.383(4) |
| N3  | C29 | 1.370(3) | C23 | C24 | 1.393(4) |
| N3  | C33 | 1.342(3) | C23 | C28 | 1.430(4) |
| C1  | C2  | 1.397(3) | C24 | C25 | 1.389(4) |
| C1  | C6  | 1.409(3) | C25 | C26 | 1.378(4) |
| C2  | C3  | 1.391(4) | C26 | C27 | 1.390(4) |
| C3  | C4  | 1.380(4) | C27 | C28 | 1.413(3) |
| C4  | C5  | 1.391(4) | C27 | C34 | 1.513(4) |
| C5  | C6  | 1.383(4) | C28 | C29 | 1.476(3) |
| C7  | C8  | 1.540(3) | C29 | C30 | 1.396(4) |
| C7  | C11 | 1.529(3) | C30 | C31 | 1.382(4) |
| C8  | C9  | 1.536(4) | C31 | C32 | 1.378(4) |
| C9  | C10 | 1.543(4) | C32 | C33 | 1.376(4) |
| C10 | C11 | 1.532(3) |     |     |          |

**Table S20: Bond Angles for 1bB.**

| Atom | Atom | Atom | Angle/°   | Atom | Atom | Atom | Angle/°    |
|------|------|------|-----------|------|------|------|------------|
| N3   | Ir1  | C11  | 94.30(6)  | C10  | C11  | C15  | 110.4(2)   |
| C1   | Ir1  | C11  | 99.05(7)  | C15  | C11  | C12  | 104.0(2)   |
| C1   | Ir1  | N3   | 97.30(9)  | C13  | C12  | C11  | 107.1(2)   |
| C1   | Ir1  | C23  | 86.61(10) | C14  | C13  | C12  | 105.1(2)   |
| C16  | Ir1  | C11  | 90.60(7)  | C15  | C14  | C13  | 103.8(2)   |
| C16  | Ir1  | N3   | 174.87(8) | N2   | C15  | C11  | 109.8(2)   |
| C16  | Ir1  | C1   | 80.41(10) | N2   | C15  | C14  | 109.3(2)   |
| C16  | Ir1  | C23  | 96.36(10) | C14  | C15  | C11  | 103.3(2)   |
| C23  | Ir1  | C11  | 171.70(7) | N1   | C16  | Ir1  | 117.55(17) |
| C23  | Ir1  | N3   | 78.88(9)  | N2   | C16  | Ir1  | 123.66(18) |
| C6   | N1   | C7   | 122.4(2)  | N2   | C16  | N1   | 118.8(2)   |
| C16  | N1   | C6   | 113.1(2)  | C18  | C17  | N2   | 119.1(2)   |
| C16  | N1   | C7   | 124.1(2)  | C22  | C17  | N2   | 119.9(2)   |
| C16  | N2   | C15  | 125.7(2)  | C22  | C17  | C18  | 121.0(2)   |
| C16  | N2   | C17  | 114.8(2)  | C19  | C18  | C17  | 119.0(3)   |
| C17  | N2   | C15  | 119.1(2)  | C20  | C19  | C18  | 120.2(3)   |

|     |     |     |            |     |     |     |            |
|-----|-----|-----|------------|-----|-----|-----|------------|
| C29 | N3  | Ir1 | 116.36(17) | C21 | C20 | C19 | 119.6(3)   |
| C33 | N3  | Ir1 | 123.85(17) | C20 | C21 | C22 | 121.3(3)   |
| C33 | N3  | C29 | 119.8(2)   | C21 | C22 | C17 | 118.9(3)   |
| C2  | C1  | Ir1 | 128.3(2)   | C24 | C23 | Ir1 | 125.24(19) |
| C2  | C1  | C6  | 117.5(2)   | C24 | C23 | C28 | 118.3(2)   |
| C6  | C1  | Ir1 | 114.19(18) | C28 | C23 | Ir1 | 116.42(18) |
| C3  | C2  | C1  | 120.6(3)   | C25 | C24 | C23 | 121.0(2)   |
| C4  | C3  | C2  | 120.8(2)   | C26 | C25 | C24 | 120.1(3)   |
| C3  | C4  | C5  | 119.8(3)   | C25 | C26 | C27 | 121.7(2)   |
| C6  | C5  | C4  | 119.5(3)   | C26 | C27 | C28 | 118.4(2)   |
| C1  | C6  | N1  | 114.5(2)   | C26 | C27 | C34 | 116.1(2)   |
| C5  | C6  | N1  | 123.6(2)   | C28 | C27 | C34 | 125.5(2)   |
| C5  | C6  | C1  | 121.8(2)   | C23 | C28 | C29 | 114.2(2)   |
| N1  | C7  | C8  | 114.1(2)   | C27 | C28 | C23 | 120.4(2)   |
| N1  | C7  | C11 | 112.1(2)   | C27 | C28 | C29 | 125.4(2)   |
| C11 | C7  | C8  | 104.8(2)   | N3  | C29 | C28 | 113.7(2)   |
| C9  | C8  | C7  | 105.2(2)   | N3  | C29 | C30 | 118.7(2)   |
| C8  | C9  | C10 | 106.1(2)   | C30 | C29 | C28 | 127.6(2)   |
| C11 | C10 | C9  | 106.4(2)   | C31 | C30 | C29 | 120.8(3)   |
| C7  | C11 | C10 | 102.1(2)   | C32 | C31 | C30 | 119.4(3)   |
| C7  | C11 | C12 | 115.6(2)   | C33 | C32 | C31 | 118.2(3)   |
| C7  | C11 | C15 | 111.7(2)   | N3  | C33 | C32 | 123.1(2)   |
| C10 | C11 | C12 | 113.3(2)   |     |     |     |            |

**Table S21: Torsion Angles for 1bB.**

| A   | B   | C   | D   | Angle/°    | A   | B   | C   | D   | Angle/°     |
|-----|-----|-----|-----|------------|-----|-----|-----|-----|-------------|
| Ir1 | N3  | C29 | C28 | 1.3(3)     | C12 | C11 | C15 | C14 | 35.3(2)     |
| Ir1 | N3  | C29 | C30 | 179.6(2)   | C12 | C13 | C14 | C15 | 31.1(3)     |
| Ir1 | N3  | C33 | C32 | 178.7(2)   | C13 | C14 | C15 | N2  | 75.4(3)     |
| Ir1 | C1  | C2  | C3  | 178.71(19) | C13 | C14 | C15 | C11 | -41.5(3)    |
| Ir1 | C1  | C6  | N1  | 0.0(3)     | C15 | N2  | C16 | Ir1 | -178.93(17) |
| Ir1 | C1  | C6  | C5  | -178.3(2)  | C15 | N2  | C16 | N1  | 0.0(3)      |
| Ir1 | C23 | C24 | C25 | -176.5(2)  | C15 | N2  | C17 | C18 | -129.6(2)   |
| Ir1 | C23 | C28 | C27 | 173.66(18) | C15 | N2  | C17 | C22 | 53.4(3)     |
| Ir1 | C23 | C28 | C29 | -7.0(3)    | C15 | C11 | C12 | C13 | -16.1(3)    |
| N1  | C7  | C8  | C9  | 153.6(2)   | C16 | N1  | C6  | C1  | -3.2(3)     |
| N1  | C7  | C11 | C10 | -163.8(2)  | C16 | N1  | C6  | C5  | 175.0(2)    |
| N1  | C7  | C11 | C12 | 72.9(3)    | C16 | N1  | C7  | C8  | -94.5(3)    |
| N1  | C7  | C11 | C15 | -45.8(3)   | C16 | N1  | C7  | C11 | 24.5(3)     |

|               |            |                |           |
|---------------|------------|----------------|-----------|
| N2 C17C18C19  | -174.9(2)  | C16 N2 C15C11  | -22.7(3)  |
| N2 C17C22C21  | 176.6(2)   | C16 N2 C15C14  | -135.4(2) |
| N3 C29C30C31  | 2.3(4)     | C16 N2 C17C18  | 57.9(3)   |
| C1 C2 C3 C4   | 0.2(4)     | C16 N2 C17C22  | -119.2(3) |
| C2 C1 C6 N1   | 179.4(2)   | C17 N2 C15C11  | 165.6(2)  |
| C2 C1 C6 C5   | 1.1(4)     | C17 N2 C15C14  | 52.9(3)   |
| C2 C3 C4 C5   | -0.3(4)    | C17 N2 C16 Ir1 | -6.9(3)   |
| C3 C4 C5 C6   | 0.8(4)     | C17 N2 C16 N1  | 172.0(2)  |
| C4 C5 C6 N1   | -179.4(2)  | C17C18C19C20   | -2.1(4)   |
| C4 C5 C6 C1   | -1.2(4)    | C18C17C22C21   | -0.4(4)   |
| C6 N1 C7 C8   | 78.1(3)    | C18C19C20C21   | 0.3(5)    |
| C6 N1 C7 C11  | -162.9(2)  | C19C20C21C22   | 1.5(4)    |
| C6 N1 C16 Ir1 | 5.1(3)     | C20C21C22C17   | -1.5(4)   |
| C6 N1 C16 N2  | -173.9(2)  | C22C17C18C19   | 2.1(4)    |
| C6 C1 C2 C3   | -0.6(4)    | C23C24C25C26   | 2.3(4)    |
| C7 N1 C6 C1   | -176.6(2)  | C23C28C29 N3   | 3.5(3)    |
| C7 N1 C6 C5   | 1.7(4)     | C23C28C29C30   | -174.6(3) |
| C7 N1 C16 Ir1 | 178.36(17) | C24C23C28C27   | -3.9(4)   |
| C7 N1 C16 N2  | -0.6(3)    | C24C23C28C29   | 175.4(2)  |
| C7 C8 C9 C10  | -9.3(3)    | C24C25C26C27   | -2.5(4)   |
| C7 C11C12C13  | -139.0(2)  | C25C26C27C28   | -0.5(4)   |
| C7 C11C15 N2  | 44.2(3)    | C25C26C27C34   | 177.0(3)  |
| C7 C11C15C14  | 160.7(2)   | C26C27C28C23   | 3.8(4)    |
| C8 C7 C11C10  | -39.5(3)   | C26C27C28C29   | -175.5(2) |
| C8 C7 C11C12  | -162.8(2)  | C27C28C29 N3   | -177.1(2) |
| C8 C7 C11C15  | 78.5(3)    | C27C28C29C30   | 4.8(4)    |
| C8 C9 C10C11  | -15.3(3)   | C28C23C24C25   | 0.9(4)    |
| C9 C10C11 C7  | 33.7(3)    | C28C29C30C31   | -179.7(3) |
| C9 C10C11C12  | 158.6(3)   | C29 N3 C33C32  | 0.9(4)    |
| C9 C10C11C15  | -85.3(3)   | C29C30C31C32   | -0.5(5)   |
| C10C11C12C13  | 103.7(3)   | C30C31C32C33   | -1.1(5)   |
| C10C11C15 N2  | 157.0(2)   | C31C32C33 N3   | 1.0(5)    |
| C10C11C15C14  | -86.5(3)   | C33 N3 C29C28  | 179.3(2)  |
| C11 C7 C8 C9  | 30.5(3)    | C33 N3 C29C30  | -2.5(4)   |
| C11C12C13C14  | -9.1(3)    | C34C27C28C23   | -173.5(3) |
| C12C11C15 N2  | -81.2(2)   | C34C27C28C29   | 7.2(4)    |

**Table S22: Hydrogen Atom Coordinates ( $\text{\AA}\times 10^4$ ) and Isotropic Displacement Parameters ( $\text{\AA}^2\times 10^3$ ) for 1bB.**

| Atom | <i>x</i> | <i>y</i> | <i>z</i> | U(eq) |
|------|----------|----------|----------|-------|
| H2   | 1990.56  | 3934.33  | 3536.01  | 23    |
| H3   | 2938.31  | 5482.42  | 4078.1   | 28    |
| H4   | 2568.65  | 7472.46  | 3756.75  | 28    |
| H5   | 1237.12  | 7931.1   | 2863.83  | 26    |
| H7   | -185     | 8155.87  | 2303.86  | 21    |
| H8A  | 643.29   | 8494.55  | 1364.21  | 31    |
| H8B  | 208.18   | 7430.47  | 779.02   | 31    |
| H9A  | -699.05  | 8789.39  | 56.51    | 45    |
| H9B  | -370.95  | 9794.8   | 731.2    | 45    |
| H10A | -1489.33 | 9471.02  | 1343.55  | 32    |
| H10B | -1931.52 | 8763.56  | 529.31   | 32    |
| H12A | -1558.62 | 7199.74  | 2634.2   | 26    |
| H12B | -2110.54 | 8314.73  | 2214.09  | 26    |
| H13A | -2607.39 | 5912.89  | 2044.14  | 33    |
| H13B | -3214.25 | 7042.94  | 1755.59  | 33    |
| H14A | -2808.93 | 5666.38  | 645.04   | 29    |
| H14B | -2897.47 | 7071.39  | 472.97   | 29    |
| H15  | -1476.57 | 6680.43  | 333.39   | 21    |
| H18  | -1636.83 | 3525.59  | 2008.19  | 27    |
| H19  | -2037.75 | 1603.07  | 1475.09  | 36    |
| H20  | -2192.18 | 1230.12  | 67.8     | 35    |
| H21  | -1936.14 | 2757.93  | -798.61  | 29    |
| H22  | -1467.5  | 4642.02  | -275     | 25    |
| H24  | -1143.89 | 5309.09  | 3155.42  | 24    |
| H25  | -1559.68 | 5267.03  | 4415.47  | 26    |
| H26  | -941.73  | 3894.59  | 5418.96  | 26    |
| H30  | 817.06   | 838.8    | 4631.59  | 30    |
| H31  | 1680.18  | -452.11  | 4053.1   | 34    |
| H32  | 1940.02  | -14.84   | 2750.28  | 32    |
| H33  | 1294.95  | 1666.7   | 2055.44  | 27    |
| H34A | 0.93     | 2457.11  | 5969.85  | 53    |
| H34B | 800.04   | 2176.34  | 5570.75  | 53    |
| H34C | -41.14   | 1364.36  | 5356.47  | 53    |

#### 8.4 X-ray ellipsoid plots of 3dB (CCDC 2054624)



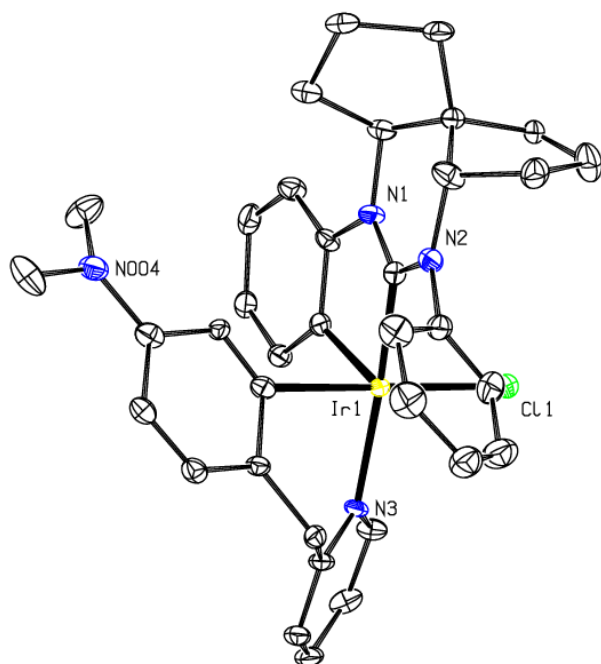

**Table S23: Crystal data and structure refinement for 3dB.**

|                                        |                                                               |
|----------------------------------------|---------------------------------------------------------------|
| Identification code                    | <b>3dB</b>                                                    |
| Empirical formula                      | C <sub>36</sub> H <sub>38</sub> ClIrN <sub>4</sub>            |
| Formula weight                         | 754.35                                                        |
| Temperature/K                          | 270.82(19)                                                    |
| Crystal system                         | hexagonal                                                     |
| Space group                            | P6 <sub>1</sub>                                               |
| a/Å                                    | 26.9599(4)                                                    |
| b/Å                                    | 26.9599(4)                                                    |
| c/Å                                    | 11.3490(2)                                                    |
| $\alpha$ /°                            | 90                                                            |
| $\beta$ /°                             | 90                                                            |
| $\gamma$ /°                            | 120                                                           |
| Volume/Å <sup>3</sup>                  | 7143.7(2)                                                     |
| Z                                      | 6                                                             |
| $\rho_{\text{calc}}/\text{cm}^3$       | 1.052                                                         |
| $\mu/\text{mm}^{-1}$                   | 6.097                                                         |
| F(000)                                 | 2256.0                                                        |
| Crystal size/mm <sup>3</sup>           | 0.15 × 0.12 × 0.09                                            |
| Radiation                              | Cu K $\alpha$ ( $\lambda$ = 1.54184)                          |
| 2 $\theta$ range for data collection/° | 10.024 to 152.184                                             |
| Index ranges                           | -23 ≤ h ≤ 32, -32 ≤ k ≤ 32, -13 ≤ l ≤ 12                      |
| Reflections collected                  | 27060                                                         |
| Independent reflections                | 8514 [R <sub>int</sub> = 0.0421, R <sub>sigma</sub> = 0.0382] |

|                                                |                                  |
|------------------------------------------------|----------------------------------|
| Data/restraints/parameters                     | 8514/25/381                      |
| Goodness-of-fit on $F^2$                       | 1.077                            |
| Final R indexes [ $I \geq 2\sigma(I)$ ]        | $R_1 = 0.0417$ , $wR_2 = 0.1134$ |
| Final R indexes [all data]                     | $R_1 = 0.0445$ , $wR_2 = 0.1154$ |
| Largest diff. peak/hole / $e \text{ \AA}^{-3}$ | 0.79/-0.76                       |
| Flack parameter                                | 0.118(15)                        |

**Table S24: Fractional Atomic Coordinates ( $\times 10^4$ ) and Equivalent Isotropic Displacement Parameters ( $\text{\AA}^2 \times 10^3$ ) for 3dB.  $U_{eq}$  is defined as 1/3 of the trace of the orthogonalised  $U_{ij}$  tensor.**

| Atom | $x$        | $y$        | $z$       | $U(eq)$   |
|------|------------|------------|-----------|-----------|
| Ir1  | 8497.5(2)  | 4924.7(2)  | 6879.5(2) | 50.96(12) |
| Cl1  | 8976.8(11) | 5012.3(15) | 8715(3)   | 84.9(8)   |
| N1   | 9523(3)    | 5182(4)    | 5624(9)   | 73(2)     |
| N2   | 9442(4)    | 5993(4)    | 6011(10)  | 75(2)     |
| N3   | 7681(3)    | 4367(3)    | 7665(8)   | 59.0(18)  |
| N4   | 8165(4)    | 4889(5)    | 1963(15)  | 91(3)     |
| C1   | 10394(4)   | 6119(6)    | 5492(10)  | 76(3)     |
| C2   | 10075(4)   | 5510(5)    | 5037(12)  | 76(3)     |
| C3   | 10027(5)   | 5547(6)    | 3670(16)  | 97(4)     |
| C4   | 10568(6)   | 6112(8)    | 3335(17)  | 114(6)    |
| C5   | 10869(5)   | 6396(6)    | 4568(14)  | 96(4)     |
| C6   | 10020(5)   | 6391(5)    | 5472(19)  | 101(5)    |
| C7   | 10343(7)   | 6897(6)    | 6306(15)  | 102(5)    |
| C8   | 10614(8)   | 6681(8)    | 7256(19)  | 127(7)    |
| C9   | 10612(4)   | 6184(6)    | 6731(11)  | 78(3)     |
| C10  | 9242(4)    | 5441(5)    | 6040(10)  | 66(2)     |
| C11  | 9219(4)    | 4579(4)    | 5642(11)  | 66(3)     |
| C12  | 8678(4)    | 4341(5)    | 6187(9)   | 63(2)     |
| C13  | 8350(4)    | 3747(4)    | 6285(11)  | 68(3)     |
| C14  | 8547(5)    | 3399(5)    | 5818(11)  | 73(3)     |
| C15  | 9079(6)    | 3656(6)    | 5196(13)  | 91(4)     |
| C16  | 9409(5)    | 4249(5)    | 5139(14)  | 81(3)     |
| C17  | 9057(5)    | 6195(5)    | 6309(12)  | 78(3)     |
| C18  | 8865(8)    | 6418(8)    | 5470(20)  | 121(5)    |
| C19  | 8483(10)   | 6577(10)   | 5860(30)  | 147(7)    |
| C20  | 8317(8)    | 6587(9)    | 7050(20)  | 128(6)    |
| C21  | 8501(9)    | 6346(9)    | 7740(20)  | 135(7)    |
| C22  | 8877(7)    | 6142(7)    | 7444(17)  | 109(5)    |

|     |         |         |          |        |
|-----|---------|---------|----------|--------|
| C23 | 7620(4) | 3948(4) | 8395(13) | 76(3)  |
| C24 | 7092(6) | 3533(6) | 8755(13) | 91(4)  |
| C25 | 6613(5) | 3571(5) | 8452(13) | 87(4)  |
| C26 | 6686(4) | 4020(5) | 7754(12) | 79(3)  |
| C27 | 7222(4) | 4419(4) | 7370(10) | 65(3)  |
| C28 | 7337(4) | 4936(5) | 6671(10) | 63(2)  |
| C29 | 7560(4) | 4934(4) | 5438(9)  | 61(2)  |
| C30 | 8063(4) | 4897(4) | 5143(12) | 65(2)  |
| C31 | 8255(4) | 4898(4) | 4172(9)  | 55(2)  |
| C32 | 7961(5) | 4901(5) | 3151(13) | 80(4)  |
| C33 | 7471(4) | 4966(5) | 3382(13) | 74(3)  |
| C34 | 7294(5) | 4970(5) | 4468(13) | 74(3)  |
| C35 | 8487(9) | 4602(9) | 1792(19) | 132(7) |
| C36 | 7874(7) | 4934(7) | 970(20)  | 139(8) |

**Table S25: Anisotropic Displacement Parameters ( $\text{\AA}^2 \times 10^3$ ) for 3dB. The Anisotropic displacement factor exponent takes the form:  $-2\pi^2[h^2a^{*2}U_{11}+2hka^*b^*U_{12}+\dots]$ .**

| Atom | $U_{11}$  | $U_{22}$ | $U_{33}$  | $U_{23}$  | $U_{13}$ | $U_{12}$  |
|------|-----------|----------|-----------|-----------|----------|-----------|
| Ir1  | 41.26(16) | 67.1(2)  | 41.44(17) | -3.61(16) | 2.84(14) | 24.74(15) |
| Cl1  | 62.7(13)  | 129(2)   | 62.7(17)  | -14.8(15) | -9.6(11) | 47.4(14)  |
| N1   | 45(4)     | 97(6)    | 77(6)     | 0(5)      | 9(4)     | 36(4)     |
| N2   | 62(5)     | 77(6)    | 84(7)     | -14(5)    | -3(4)    | 33(4)     |
| N3   | 31(3)     | 73(5)    | 61(5)     | 8(4)      | 9(3)     | 18(3)     |
| N4   | 65(5)     | 97(7)    | 109(9)    | -3(7)     | 8(7)     | 38(5)     |
| C1   | 53(5)     | 104(8)   | 58(7)     | 0(5)      | 4(4)     | 29(5)     |
| C2   | 51(5)     | 92(7)    | 87(9)     | 16(6)     | 15(5)    | 36(5)     |
| C3   | 62(6)     | 110(9)   | 110(12)   | 2(9)      | 19(7)    | 36(6)     |
| C4   | 77(8)     | 140(12)  | 115(14)   | 4(11)     | 43(9)    | 46(8)     |
| C5   | 64(6)     | 98(9)    | 102(11)   | 6(7)      | 37(7)    | 22(6)     |
| C6   | 69(6)     | 72(7)    | 153(16)   | 1(8)      | 3(8)     | 28(6)     |
| C7   | 114(11)   | 85(8)    | 104(12)   | -17(8)    | 3(9)     | 47(8)     |
| C8   | 132(13)   | 133(13)  | 130(16)   | -29(11)   | -57(12)  | 77(11)    |
| C9   | 57(5)     | 110(8)   | 51(6)     | -11(6)    | -7(5)    | 29(5)     |
| C10  | 60(5)     | 76(6)    | 59(6)     | -6(5)     | -2(4)    | 32(5)     |
| C11  | 42(4)     | 72(6)    | 83(7)     | -3(5)     | -7(4)    | 29(4)     |
| C12  | 57(5)     | 87(7)    | 50(5)     | -3(5)     | -9(4)    | 40(5)     |
| C13  | 56(5)     | 61(5)    | 84(8)     | -15(5)    | 3(5)     | 27(4)     |
| C14  | 79(7)     | 82(7)    | 69(7)     | -17(5)    | -15(5)   | 48(6)     |
| C15  | 109(9)    | 120(10)  | 76(8)     | -36(8)    | -28(8)   | 82(8)     |

|     |         |         |         |        |         |         |
|-----|---------|---------|---------|--------|---------|---------|
| C16 | 62(5)   | 93(7)   | 96(9)   | 0(8)   | 4(6)    | 46(5)   |
| C17 | 75(7)   | 66(6)   | 86(9)   | -13(6) | 7(6)    | 30(5)   |
| C18 | 122(9)  | 116(9)  | 139(12) | 7(8)   | -3(8)   | 69(8)   |
| C19 | 149(12) | 143(11) | 160(13) | 1(10)  | -6(10)  | 83(10)  |
| C20 | 129(10) | 129(10) | 127(12) | -14(9) | 14(9)   | 67(8)   |
| C21 | 136(11) | 145(11) | 136(12) | -11(9) | 32(9)   | 78(9)   |
| C22 | 123(12) | 105(10) | 99(12)  | -27(9) | -7(9)   | 57(10)  |
| C23 | 62(5)   | 73(6)   | 90(9)   | 25(6)  | 22(6)   | 33(5)   |
| C24 | 113(10) | 100(8)  | 79(9)   | 24(7)  | 35(7)   | 68(8)   |
| C25 | 63(6)   | 82(7)   | 88(9)   | -3(7)  | 36(6)   | 17(5)   |
| C26 | 49(5)   | 83(7)   | 97(9)   | -19(6) | 15(5)   | 27(5)   |
| C27 | 43(4)   | 64(5)   | 82(7)   | -6(5)  | 19(4)   | 22(4)   |
| C28 | 61(5)   | 80(6)   | 57(6)   | -8(5)  | -7(4)   | 41(5)   |
| C29 | 47(4)   | 76(6)   | 64(6)   | 7(5)   | 6(4)    | 34(4)   |
| C30 | 56(5)   | 67(5)   | 78(7)   | 3(5)   | 0(5)    | 35(4)   |
| C31 | 52(4)   | 74(5)   | 49(5)   | -2(4)  | 0(4)    | 37(4)   |
| C32 | 67(6)   | 60(5)   | 121(12) | -7(6)  | 4(6)    | 36(5)   |
| C33 | 63(5)   | 78(6)   | 92(9)   | 6(6)   | -16(6)  | 43(5)   |
| C34 | 63(6)   | 74(6)   | 93(9)   | -10(6) | -8(6)   | 41(5)   |
| C35 | 188(17) | 199(18) | 83(11)  | 28(14) | 24(12)  | 151(16) |
| C36 | 97(11)  | 84(9)   | 210(20) | 11(12) | -50(13) | 23(8)   |

**Table S26: Bond Lengths for 3dB.**

| Atom | Atom | Length/Å  | Atom | Atom | Length/Å  |
|------|------|-----------|------|------|-----------|
| Ir1  | C11  | 2.400(3)  | C9   | C8   | 1.46(2)   |
| Ir1  | N3   | 2.142(7)  | C11  | C16  | 1.357(16) |
| Ir1  | C10  | 2.020(11) | C12  | C11  | 1.409(14) |
| Ir1  | C12  | 2.023(11) | C12  | C13  | 1.395(15) |
| Ir1  | C30  | 2.274(13) | C13  | C14  | 1.392(15) |
| N1   | C2   | 1.458(13) | C15  | C14  | 1.43(2)   |
| N1   | C10  | 1.348(14) | C16  | C15  | 1.388(18) |
| N1   | C11  | 1.407(14) | C17  | C18  | 1.35(2)   |
| N2   | C6   | 1.510(17) | C17  | C22  | 1.36(2)   |
| N2   | C10  | 1.304(14) | C18  | C19  | 1.37(3)   |
| N2   | C17  | 1.434(15) | C20  | C19  | 1.42(4)   |
| N3   | C23  | 1.342(14) | C21  | C20  | 1.27(3)   |
| N3   | C27  | 1.355(13) | C22  | C21  | 1.41(3)   |
| N4   | C32  | 1.46(2)   | C24  | C23  | 1.361(17) |
| N4   | C35  | 1.435(18) | C25  | C24  | 1.388(19) |

|    |     |           |     |     |           |
|----|-----|-----------|-----|-----|-----------|
| N4 | C36 | 1.41(2)   | C26 | C25 | 1.38(2)   |
| C1 | C2  | 1.513(18) | C26 | C27 | 1.372(14) |
| C1 | C5  | 1.530(15) | C27 | C28 | 1.494(15) |
| C1 | C6  | 1.515(18) | C29 | C28 | 1.523(14) |
| C2 | C3  | 1.56(2)   | C29 | C34 | 1.343(16) |
| C4 | C3  | 1.54(2)   | C30 | C29 | 1.451(13) |
| C4 | C5  | 1.61(2)   | C30 | C31 | 1.217(16) |
| C6 | C7  | 1.53(2)   | C32 | C31 | 1.407(17) |
| C7 | C8  | 1.57(2)   | C32 | C33 | 1.441(15) |
| C9 | C1  | 1.501(16) | C34 | C33 | 1.323(19) |

**Table S27: Bond Angles for 3dB.**

| Atom | Atom | Atom | Angle/°   | Atom | Atom | Atom | Angle/°   |
|------|------|------|-----------|------|------|------|-----------|
| N3   | Ir1  | Cl1  | 91.2(2)   | N2   | C10  | Ir1  | 120.0(8)  |
| N3   | Ir1  | C30  | 90.3(3)   | N2   | C10  | N1   | 124.3(10) |
| C10  | Ir1  | Cl1  | 92.3(3)   | N1   | C11  | C12  | 114.0(9)  |
| C10  | Ir1  | N3   | 176.4(4)  | C16  | C11  | N1   | 123.9(9)  |
| C10  | Ir1  | C30  | 86.1(4)   | C16  | C11  | C12  | 122.1(10) |
| C12  | Ir1  | Cl1  | 95.0(3)   | C11  | C12  | Ir1  | 114.4(8)  |
| C12  | Ir1  | N3   | 100.2(4)  | C13  | C12  | Ir1  | 127.0(7)  |
| C12  | Ir1  | C10  | 79.1(4)   | C13  | C12  | C11  | 118.4(9)  |
| C12  | Ir1  | C30  | 87.6(4)   | C14  | C13  | C12  | 120.5(10) |
| C30  | Ir1  | Cl1  | 176.7(3)  | C13  | C14  | C15  | 119.3(11) |
| C10  | N1   | C2   | 120.9(10) | C16  | C15  | C14  | 119.4(11) |
| C10  | N1   | C11  | 116.0(8)  | C11  | C16  | C15  | 120.1(11) |
| C11  | N1   | C2   | 122.5(9)  | C18  | C17  | N2   | 120.9(14) |
| C10  | N2   | C6   | 120.9(10) | C18  | C17  | C22  | 121.0(15) |
| C10  | N2   | C17  | 117.5(10) | C22  | C17  | N2   | 118.2(14) |
| C17  | N2   | C6   | 120.7(10) | C17  | C18  | C19  | 115(2)    |
| C23  | N3   | Ir1  | 119.9(6)  | C18  | C19  | C20  | 127(2)    |
| C23  | N3   | C27  | 120.3(8)  | C21  | C20  | C19  | 112(2)    |
| C27  | N3   | Ir1  | 119.7(7)  | C20  | C21  | C22  | 126(2)    |
| C35  | N4   | C32  | 118.2(13) | C17  | C22  | C21  | 118.3(19) |
| C36  | N4   | C32  | 120.1(13) | N3   | C23  | C24  | 121.0(11) |
| C36  | N4   | C35  | 116.7(16) | C23  | C24  | C25  | 119.7(11) |
| C2   | C1   | C5   | 100.2(10) | C26  | C25  | C24  | 118.5(10) |
| C2   | C1   | C6   | 111.6(9)  | C27  | C26  | C25  | 120.3(11) |
| C6   | C1   | C5   | 110.5(12) | N3   | C27  | C26  | 119.9(11) |
| C9   | C1   | C2   | 115.1(11) | N3   | C27  | C28  | 117.0(8)  |

|    |     |     |           |     |     |     |           |
|----|-----|-----|-----------|-----|-----|-----|-----------|
| C9 | C1  | C5  | 113.6(10) | C26 | C27 | C28 | 123.1(10) |
| C9 | C1  | C6  | 105.9(12) | C27 | C28 | C29 | 112.5(8)  |
| N1 | C2  | C1  | 110.8(10) | C30 | C29 | C28 | 126.6(10) |
| N1 | C2  | C3  | 113.6(10) | C34 | C29 | C28 | 121.9(9)  |
| C1 | C2  | C3  | 106.8(10) | C34 | C29 | C30 | 111.5(10) |
| C4 | C3  | C2  | 103.9(13) | C29 | C30 | Ir1 | 106.4(8)  |
| C3 | C4  | C5  | 105.0(13) | C31 | C30 | Ir1 | 125.0(7)  |
| C1 | C5  | C4  | 105.3(10) | C31 | C30 | C29 | 128.4(11) |
| N2 | C6  | C1  | 110.4(11) | C30 | C31 | C32 | 120.3(9)  |
| N2 | C6  | C7  | 108.0(14) | C31 | C32 | N4  | 122.6(10) |
| C1 | C6  | C7  | 101.7(12) | C31 | C32 | C33 | 113.9(12) |
| C6 | C7  | C8  | 105.0(13) | C33 | C32 | N4  | 123.3(12) |
| C9 | C8  | C7  | 105.7(14) | C34 | C33 | C32 | 121.8(11) |
| C8 | C9  | C1  | 108.1(13) | C33 | C34 | C29 | 123.8(10) |
| N1 | C10 | Ir1 | 115.5(8)  |     |     |     |           |

**Table S28: Torsion Angles for 3dB.**

| A   | B   | C   | D   | Angle/°    | A   | B   | C   | D   | Angle/°    |
|-----|-----|-----|-----|------------|-----|-----|-----|-----|------------|
| Ir1 | N3  | C23 | C24 | -169.3(11) | C10 | N1  | C11 | C12 | -4.9(14)   |
| Ir1 | N3  | C27 | C26 | 171.9(8)   | C10 | N1  | C11 | C16 | 172.3(12)  |
| Ir1 | N3  | C27 | C28 | -10.8(12)  | C10 | N2  | C6  | C1  | -24(2)     |
| Ir1 | C12 | C11 | N1  | -3.2(12)   | C10 | N2  | C6  | C7  | -134.4(13) |
| Ir1 | C12 | C11 | C16 | 179.6(10)  | C10 | N2  | C17 | C18 | -109.5(15) |
| Ir1 | C12 | C13 | C14 | -176.1(9)  | C10 | N2  | C17 | C22 | 68.8(16)   |
| Ir1 | C30 | C29 | C28 | -5.2(12)   | C11 | N1  | C2  | C1  | -160.6(10) |
| Ir1 | C30 | C29 | C34 | 174.8(8)   | C11 | N1  | C2  | C3  | 79.2(14)   |
| Ir1 | C30 | C31 | C32 | -177.6(7)  | C11 | N1  | C10 | Ir1 | 10.8(13)   |
| N1  | C2  | C3  | C4  | 152.8(11)  | C11 | N1  | C10 | N2  | -174.8(11) |
| N1  | C11 | C16 | C15 | -179.7(12) | C11 | C12 | C13 | C14 | -2.1(16)   |
| N2  | C6  | C7  | C8  | 82.7(16)   | C11 | C16 | C15 | C14 | -2(2)      |
| N2  | C17 | C18 | C19 | 177.7(16)  | C12 | C11 | C16 | C15 | -3(2)      |
| N2  | C17 | C22 | C21 | 179.4(14)  | C12 | C13 | C14 | C15 | -2.4(18)   |
| N3  | C27 | C28 | C29 | 66.5(12)   | C13 | C12 | C11 | N1  | -177.9(10) |
| N4  | C32 | C31 | C30 | -178.5(10) | C13 | C12 | C11 | C16 | 4.9(17)    |
| N4  | C32 | C33 | C34 | 179.4(11)  | C16 | C15 | C14 | C13 | 4.5(19)    |
| C1  | C2  | C3  | C4  | 30.4(13)   | C17 | N2  | C6  | C1  | 167.4(12)  |
| C1  | C6  | C7  | C8  | -33.4(17)  | C17 | N2  | C6  | C7  | 57.0(17)   |
| C1  | C9  | C8  | C7  | 4.0(18)    | C17 | N2  | C10 | Ir1 | -15.8(15)  |
| C2  | N1  | C10 | Ir1 | -177.9(8)  | C17 | N2  | C10 | N1  | 170.0(11)  |

|               |            |                 |            |
|---------------|------------|-----------------|------------|
| C2 N1 C10 N2  | -3.5(18)   | C17 C18 C19 C20 | 7(3)       |
| C2 N1 C11 C12 | -176.1(10) | C17 C22 C21 C20 | -1(3)      |
| C2 N1 C11 C16 | 1.1(18)    | C18 C17 C22 C21 | -2(2)      |
| C2 C1 C5 C4   | 38.9(14)   | C21 C20 C19 C18 | -10(3)     |
| C2 C1 C6 N2   | 47.9(17)   | C22 C17 C18 C19 | 0(3)       |
| C2 C1 C6 C7   | 162.3(12)  | C22 C21 C20 C19 | 7(3)       |
| C3 C4 C5 C1   | -21.3(16)  | C23 N3 C27 C26  | -4.5(16)   |
| C5 C1 C2 N1   | -167.4(11) | C23 N3 C27 C28  | 172.9(10)  |
| C5 C1 C2 C3   | -43.3(12)  | C25 C24 C23 N3  | -6(2)      |
| C5 C1 C6 N2   | 158.5(12)  | C25 C26 C27 N3  | 1.0(18)    |
| C5 C1 C6 C7   | -87.1(15)  | C25 C26 C27 C28 | -176.2(11) |
| C5 C4 C3 C2   | -5.0(15)   | C26 C25 C24 C23 | 2(2)       |
| C6 N2 C10 Ir1 | 175.2(11)  | C26 C27 C28 C29 | -116.2(11) |
| C6 N2 C10 N1  | 1.0(19)    | C27 N3 C23 C24  | 7.0(19)    |
| C6 N2 C17 C18 | 59.5(19)   | C27 C26 C25 C24 | 0.0(19)    |
| C6 N2 C17 C22 | -122.3(16) | C28 C29 C34 C33 | -179.5(11) |
| C6 C1 C2 N1   | -50.4(15)  | C29 C30 C31 C32 | -4.3(17)   |
| C6 C1 C2 C3   | 73.8(13)   | C29 C34 C33 C32 | 2.2(19)    |
| C6 C1 C5 C4   | -78.9(15)  | C30 C29 C28 C27 | -56.8(13)  |
| C6 C7 C8 C9   | 18.8(19)   | C30 C29 C34 C33 | 0.5(16)    |
| C8 C9 C1 C2   | -149.4(12) | C31 C30 C29 C28 | -179.5(11) |
| C8 C9 C1 C5   | 95.8(15)   | C31 C30 C29 C34 | 0.5(16)    |
| C8 C9 C1 C6   | -25.7(15)  | C31 C32 C33 C34 | -5.5(16)   |
| C9 C1 C2 N1   | 70.3(12)   | C33 C32 C31 C30 | 6.4(15)    |
| C9 C1 C2 C3   | -165.5(9)  | C34 C29 C28 C27 | 123.2(11)  |
| C9 C1 C5 C4   | 162.2(13)  | C35 N4 C32 C31  | 30.2(19)   |
| C9 C1 C6 N2   | -78.0(14)  | C35 N4 C32 C33  | -155.2(14) |
| C9 C1 C6 C7   | 36.4(14)   | C36 N4 C32 C31  | -175.6(12) |
| C10 N1 C2 C1  | 28.6(15)   | C36 N4 C32 C33  | -0.9(18)   |
| C10 N1 C2 C3  | -91.6(14)  |                 |            |

**Table S29: Hydrogen Atom Coordinates ( $\text{\AA} \times 10^4$ ) and Isotropic Displacement Parameters ( $\text{\AA}^2 \times 10^3$ ) for 3dB.**

| Atom | <i>x</i> | <i>y</i> | <i>z</i> | U(eq) |
|------|----------|----------|----------|-------|
| H00Q | 10305.31 | 5328.92  | 5203.81  | 92    |
| H00X | 10021.65 | 5223.81  | 3281.21  | 117   |
| H00Y | 9683.2   | 5556.19  | 3458.68  | 117   |
| H00R | 10467.03 | 6360.77  | 2908.58  | 137   |
| H00S | 10820.15 | 6039.07  | 2847.97  | 137   |

|      |          |         |         |     |
|------|----------|---------|---------|-----|
| H01A | 11175.64 | 6317.56 | 4739.61 | 116 |
| H01B | 11025.74 | 6807.46 | 4549.31 | 116 |
| H00V | 9985.75  | 6514.61 | 4678.22 | 121 |
| H01C | 10083.43 | 7002.88 | 6671.09 | 123 |
| H01D | 10638.17 | 7226.4  | 5887.6  | 123 |
| H01E | 11002.19 | 6978.1  | 7439.58 | 153 |
| H01F | 10389.45 | 6573.2  | 7974.78 | 153 |
| H00E | 10367.07 | 5842.16 | 7183.15 | 94  |
| H00F | 10996.71 | 6240.15 | 6729.55 | 94  |
| H00O | 7997.11  | 3581.48 | 6664.71 | 82  |
| H00W | 8334.15  | 3003.89 | 5909.12 | 87  |
| H00T | 9203.37  | 3428.67 | 4831.78 | 109 |
| H00M | 9761.42  | 4419.95 | 4756.79 | 97  |
| H00U | 8984.91  | 6460    | 4693.68 | 146 |
| H68  | 8313.42  | 6689.36 | 5288.21 | 176 |
| H015 | 8100.84  | 6750.78 | 7287.89 | 153 |
| H014 | 8377.79  | 6299.6  | 8521.74 | 162 |
| H013 | 8997.92  | 5976.4  | 8009.89 | 131 |
| H00L | 7942.97  | 3941.62 | 8659.73 | 91  |
| H00H | 7052.04  | 3226.04 | 9200.67 | 109 |
| H00G | 6250.6   | 3298.44 | 8714.74 | 104 |
| H00B | 6370.52  | 4052.64 | 7540.86 | 95  |
| H00A | 7616.63  | 5276.86 | 7085.04 | 76  |
| H00C | 6986.35  | 4951.55 | 6609.04 | 76  |
| H00D | 8598.47  | 4896.56 | 4104.62 | 67  |
| H00J | 7273.13  | 5005.71 | 2750.9  | 89  |
| H00I | 6967.11  | 4999.49 | 4564.46 | 88  |
| H    | 8837.39  | 4852.66 | 1388.04 | 198 |
| H00Z | 8571.96  | 4498.76 | 2542.96 | 198 |
| HA   | 8265.78  | 4262.77 | 1329.48 | 198 |
| H00K | 7561.78  | 4561.33 | 770.66  | 208 |
| H00N | 8133.52  | 5084.97 | 317.32  | 208 |
| H00P | 7727.4   | 5184.58 | 1149.82 | 208 |

---



## 9. References

- (1) C. M. M. Gómez, V. V. Kouznetsov, M. A. Sortino, S. L. Álvarez and S. A. Zacchino, In vitro antifungal activity of polyfunctionalized 2-(hetero)arylquinolines prepared through imino Diels–Alder reactions. *Bioorganic & Medicinal Chemistry*, 2008, **16**, 7908–7320.
- (2) A. Ros, B. Estepa, R. López-Rodríguez, E. Álvarez, R. Fernández and J. M. Lassaletta, Use of Hemilabile *N,N* Ligands in Nitrogen-Directed Iridium-Catalyzed Borylations of Arenes. *Angew. Chem. Int. Ed.* 2011, **50**, 11724–11728.
- (3) O. Kobayashi, D. Uruguchi and T. Yamakawa, Cp<sub>2</sub>Ni-KOt-Bu-BE<sub>3</sub> (or PPh<sub>3</sub>) Catalyst System for Direct C–H Arylation of Benzene, Naphthalene, and Pyridine. *Org. Lett.* 2009, **11**, 2679–2682.
- (4) J. Y. Kim, S. H. Park, J. Ryu, S. H. Cho, S. H. Kim and S. Chang Rhodium-Catalyzed Intermolecular Amidation of Arenes with Sulfonyl Azides via Chelation-Assisted C–H Bond Activation. *J. Am. Chem. Soc.* 2012, **134**, 9110–9113.
- (5) G.-F. Zhang, Y. Li, X.-Q. Xie and C.-R. Ding, Ru-Catalyzed Regioselective Direct Hydroxymethylation of (Hetero)Arenes via C–H Activation. *Org. Lett.* 2017, **19**, 1216–1219.
- (6) Z.-Y. Li, H. H. C. Lakmal and X. Cui, Enabling Catalytic Arene C–H Amidomethylation via Bis(tosylamido)methane as a Sustainable Formaldimine Releaser. *Org. Lett.* 2019, **21**, 3735–3740.
- (7) Z. Ibrahim Mohamed Allaoui, E. le Gall, A. Fihey, R. Plaza-Pedroche, C. Katan, F. Robin-le Guen, J. Rodríguez-López and S. Achelle, Push-Pull (Iso)quinoline Chromophores: Synthesis, Photophysical Properties, and Use for White-Light Emission. *Chemistry - A European Journal* 2020, **26**, 8153–8161.
- (8) T. Niwa, H. Yorimitsu and K. Oshima, Palladium-Catalyzed 2-Pyridylmethyl Transfer from 2-(2-Pyridyl)ethanol Derivatives to Organic Halides by Chelation-Assisted Cleavage of Unstrained C<sub>sp<sup>3</sup></sub>–C<sub>sp<sup>3</sup></sub> bonds. *Angew. Chem. Int. Ed.* 2007, **46**, 2643–2645.
- (9) A. Skrzyńska, A. Przydacz and Ł. Albrecht, Organocatalytic Nonclassical Trienamine Activation in the Remote Alkylation of Furan Derivatives. *Org. Lett.* 2015, **17**, 5682–5685.
- (10) M. J. Burns, I. J. S. Fairlamb, A. R. Kapdi, P. Sehna, R. J. K. Taylor, Simple Palladium(II) Precatalyst for Suzuki–Miyaura Couplings: Efficient Reactions of Benzylic, Aryl, Heteroaryl, and Vinyl Coupling Partners. *Org. Lett.* 2007, **9**, 5397–5400.
- (11) Y.-X. Tan, X.-Y. Liu, Y.-S. Zhao, P. Tian and G.-Q. Lin, Arylation/Intramolecular Conjugate Addition of 1,6-Enynes Enabled by Manganese(I)-Catalyzed C–H Bond Activation. *Org. Lett.* 2019, **21**, 5–9.
- (12) J.-D. Chai and M. Head-Gordon, Long-range corrected hybrid density functionals with damped atom–atom dispersion corrections. *Phys. Chem. Chem. Phys.*, 2008, **10**, 6615–6620.
- (13) Frisch, M. J.; Trucks, G. W.; Schlegel, H. B.; Scuseria, G. E.; Robb, M. A.; Cheeseman, J. R.; Scalmani, G.; Barone, V.; Mennucci, B.; Petersson, G. A.; Nakatsuji, H.; Caricato, M.; Li, X.; Hratchian, H. P.; Izmaylov, A. F.; Bloino, J.; Zheng, G.; Sonnenberg, J. L.; Hada, M.; Ehara, M.; Toyota, K.; Fukuda, R.; Hasegawa, J.; Ishida, M.; T. Nakajima; Honda, Y.; Kitao, O.; Nakai, H.; Vreven, T.; J. A. Montgomery, J.; Peralta, J. E.; Ogliaro, F.; Bearpark, M.; Heyd, J. J.; Brothers, E.; Kudin, K. N.; Staroverov, V. N.; Keith, T.; Kobayashi, R.; Normand, J.; Raghavachari, K.; Rendell, A.; Burant, J. C.; Iyengar, S. S.; Tomasi, J.; Cossi, M.; Rega, N.; Millam, J. M.; Klene, M.; Knox, J. E.; Cross, J. B.; Bakken, V.; Adamo, C.; Jaramillo, J.; Gomperts, R.; Stratmann, R. E.; Yazyev, O.; Austin, A. J.; Cammi, R.; Pomelli, C.; Ochterski, J. W.; Martin, R. L.; Morokuma, K.; Zakrzewski, V. G.; Voth, G. A.; Salvador, P.; Dannenberg, J. J.; Dapprich, S.; Daniels, A. D.; Farkas,

O.; Foresman, J. B.; Ortiz, J. V.; Cioslowski, J.; Fox, D. J. Gaussian 09, Revision D.01; Gaussian, Inc.: Wallingford, CT, 2013.

(14) A. Armstrong, R. A. Boto, P. Dingwall, J. Contreras-Garcia, M. J. Harvey, N. J. Mason and H. S. Rzepa, The Houk-List transition states for organocatalytic mechanisms revisited. *Chem. Sci.* 2014, **5**, 2057–2071.

(15) A. V. Marenich, C. J. Cramer and D. G. Truhlar, Performance of SM6, SM8, and SMD on the SAMPL1 Test set for the prediction of small-molecule solvation free energies. *J. Phys. Chem. B* 2009, **113**, 4538–4543.

(16) K. Fukui, The path of chemical reactions—the IRC approach. *Acc. Chem. Res.* 1981, **14**, 363–368.

(17) C. Gonzalez and B. Schlegel, An improved algorithm for reaction path following. *J. Chem. Phys.* 1989, **90**, 2154–2161.

## 10. Copies of NMR spectroscopy

8.63  
8.62  
8.62  
7.72  
7.70  
7.70  
7.68  
7.68  
7.65  
7.64  
7.63  
7.44  
7.42  
7.42  
7.41  
7.39  
7.38  
7.37  
7.25  
7.24  
7.23  
7.22  
7.22

0.85  
0.83  
0.81  
0.58  
0.56  
0.54  
0.52  
-0.00

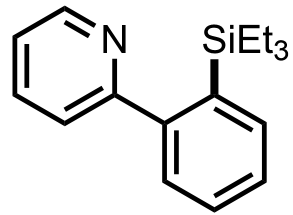

**2a**

**<sup>1</sup>H NMR spectrum (400 MHz, CDCl<sub>3</sub>)**

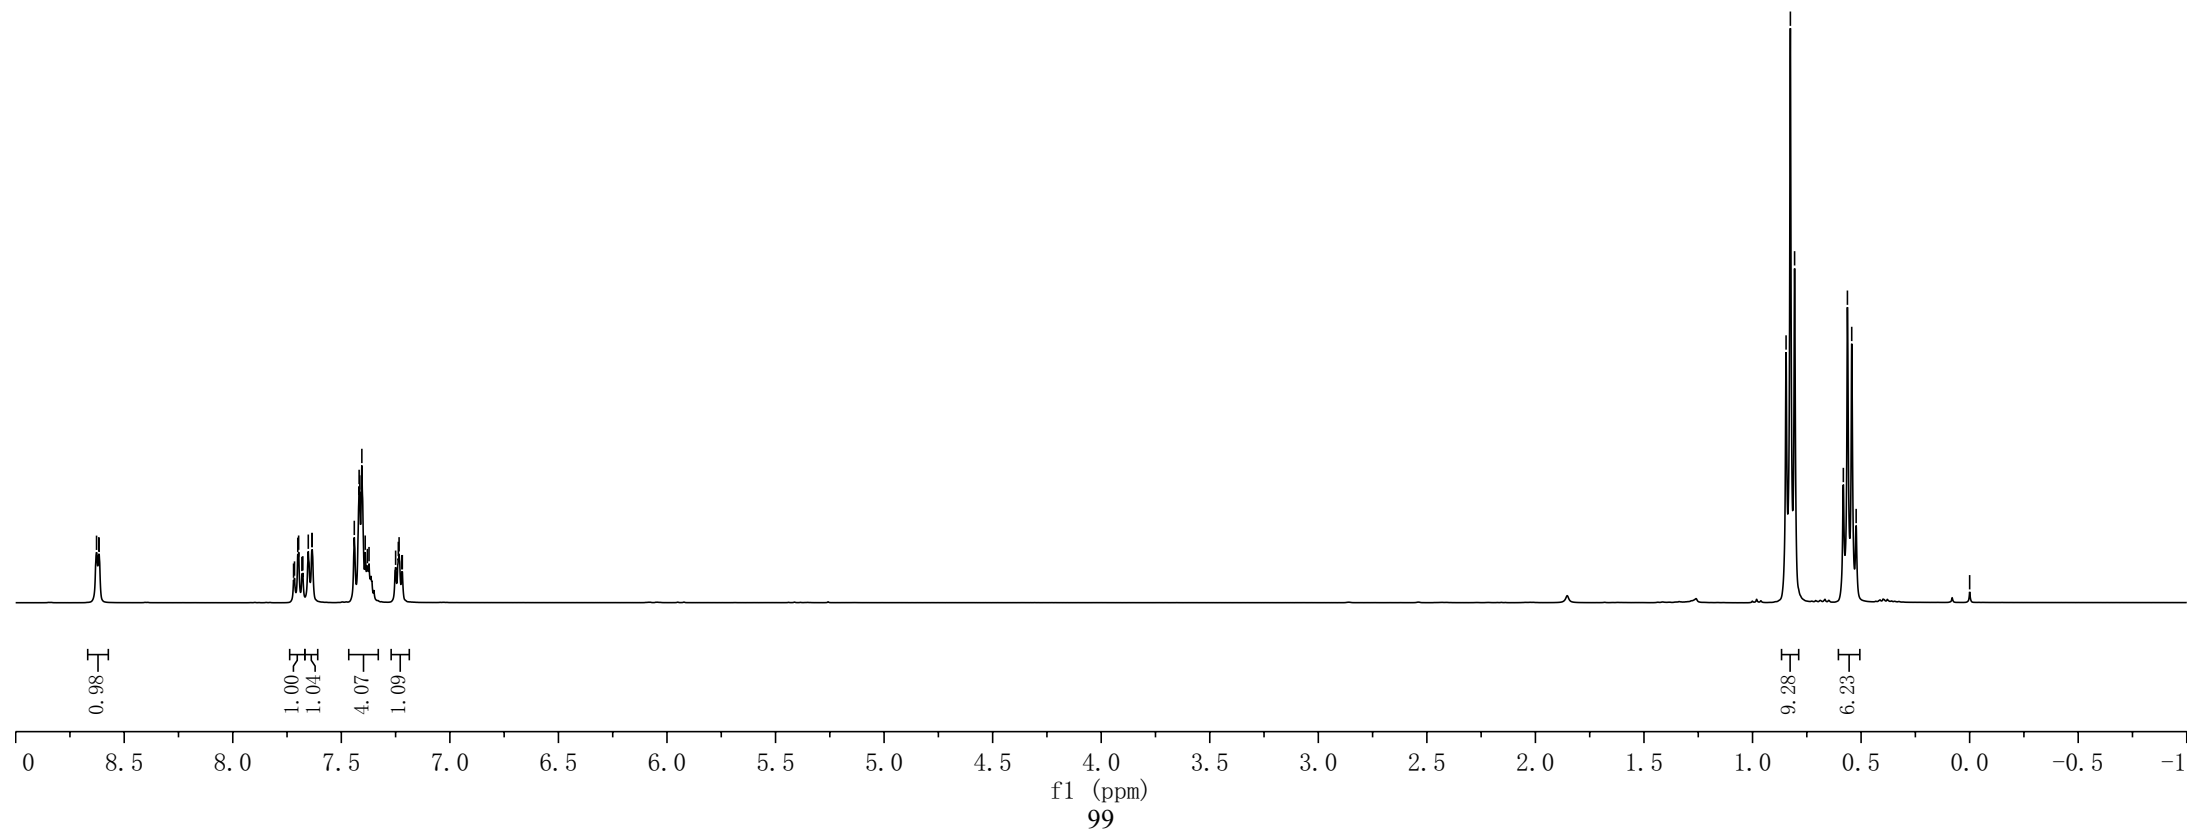

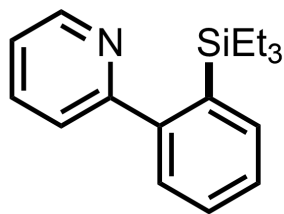

2a

<sup>13</sup>C NMR spectrum (100 MHz, CDCl<sub>3</sub>)

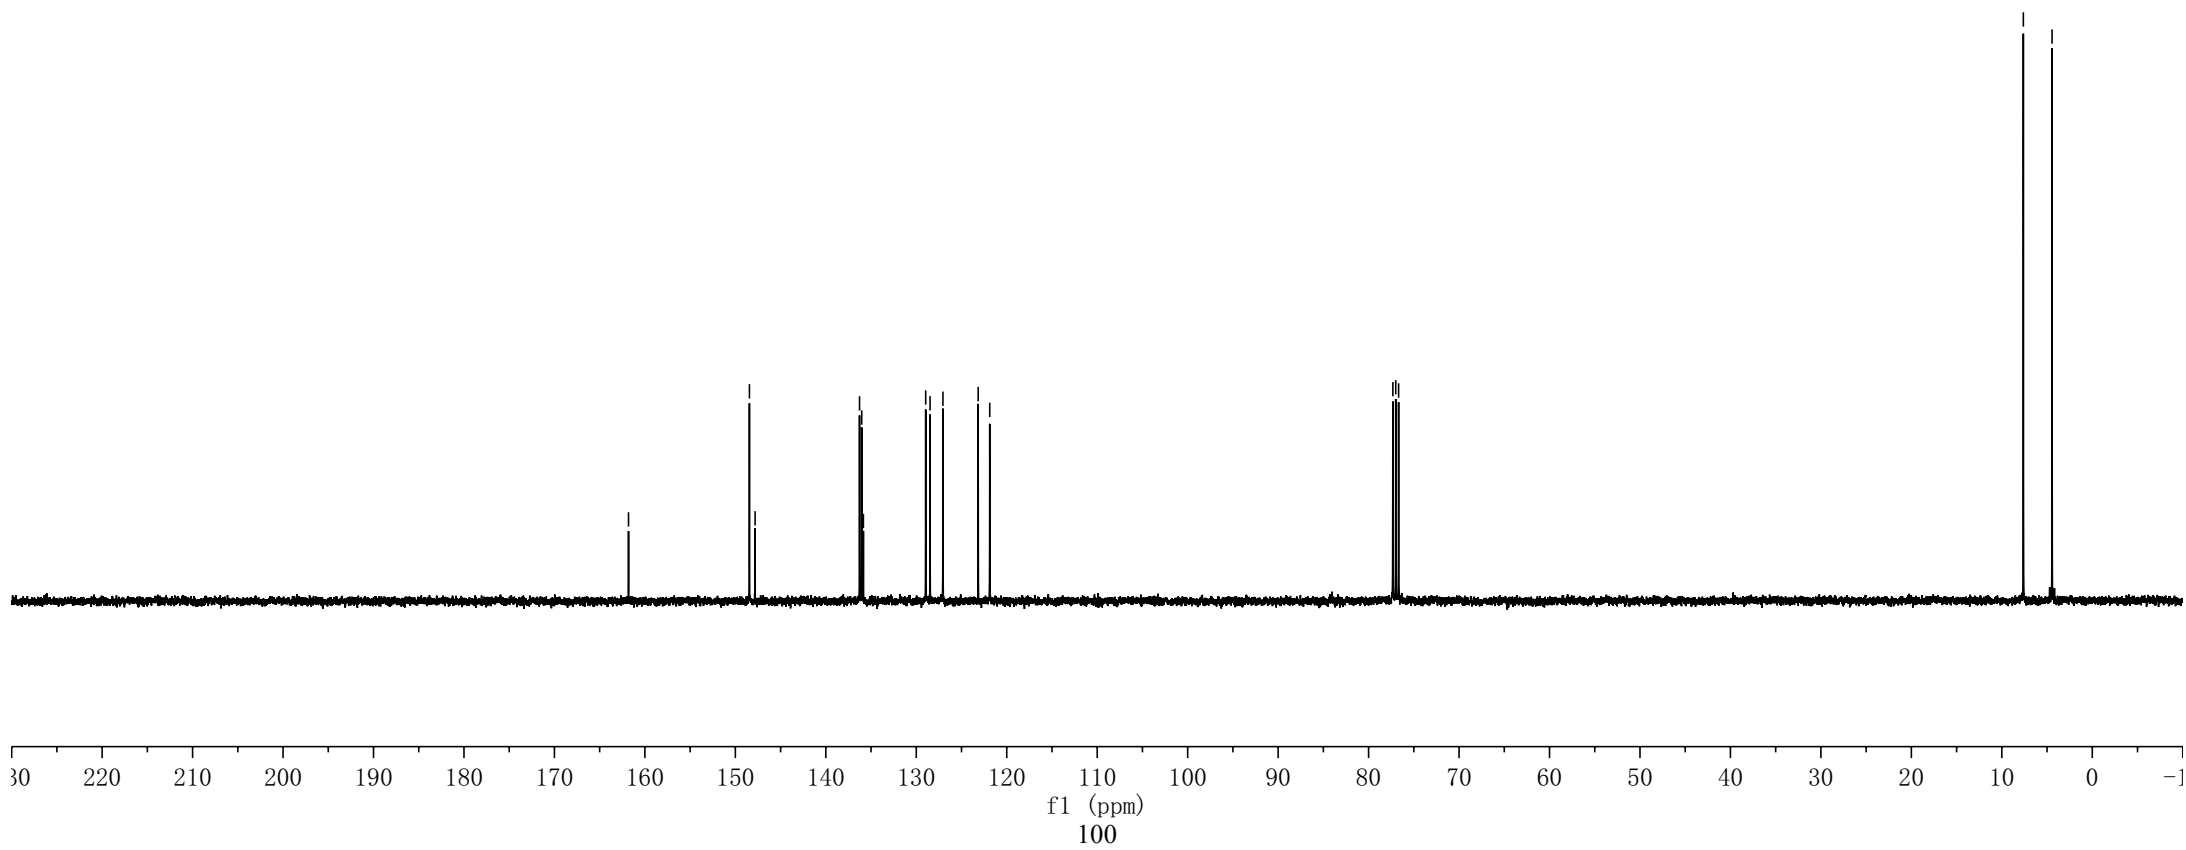

8.68  
8.67  
7.72  
7.72  
7.70  
7.70  
7.68  
7.68  
7.44  
7.42  
7.28  
7.26  
7.24

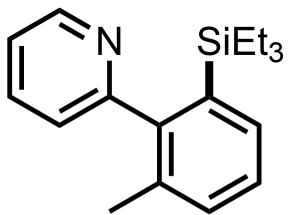

**2b**

<sup>1</sup>H NMR spectrum (400 MHz, CDCl<sub>3</sub>)

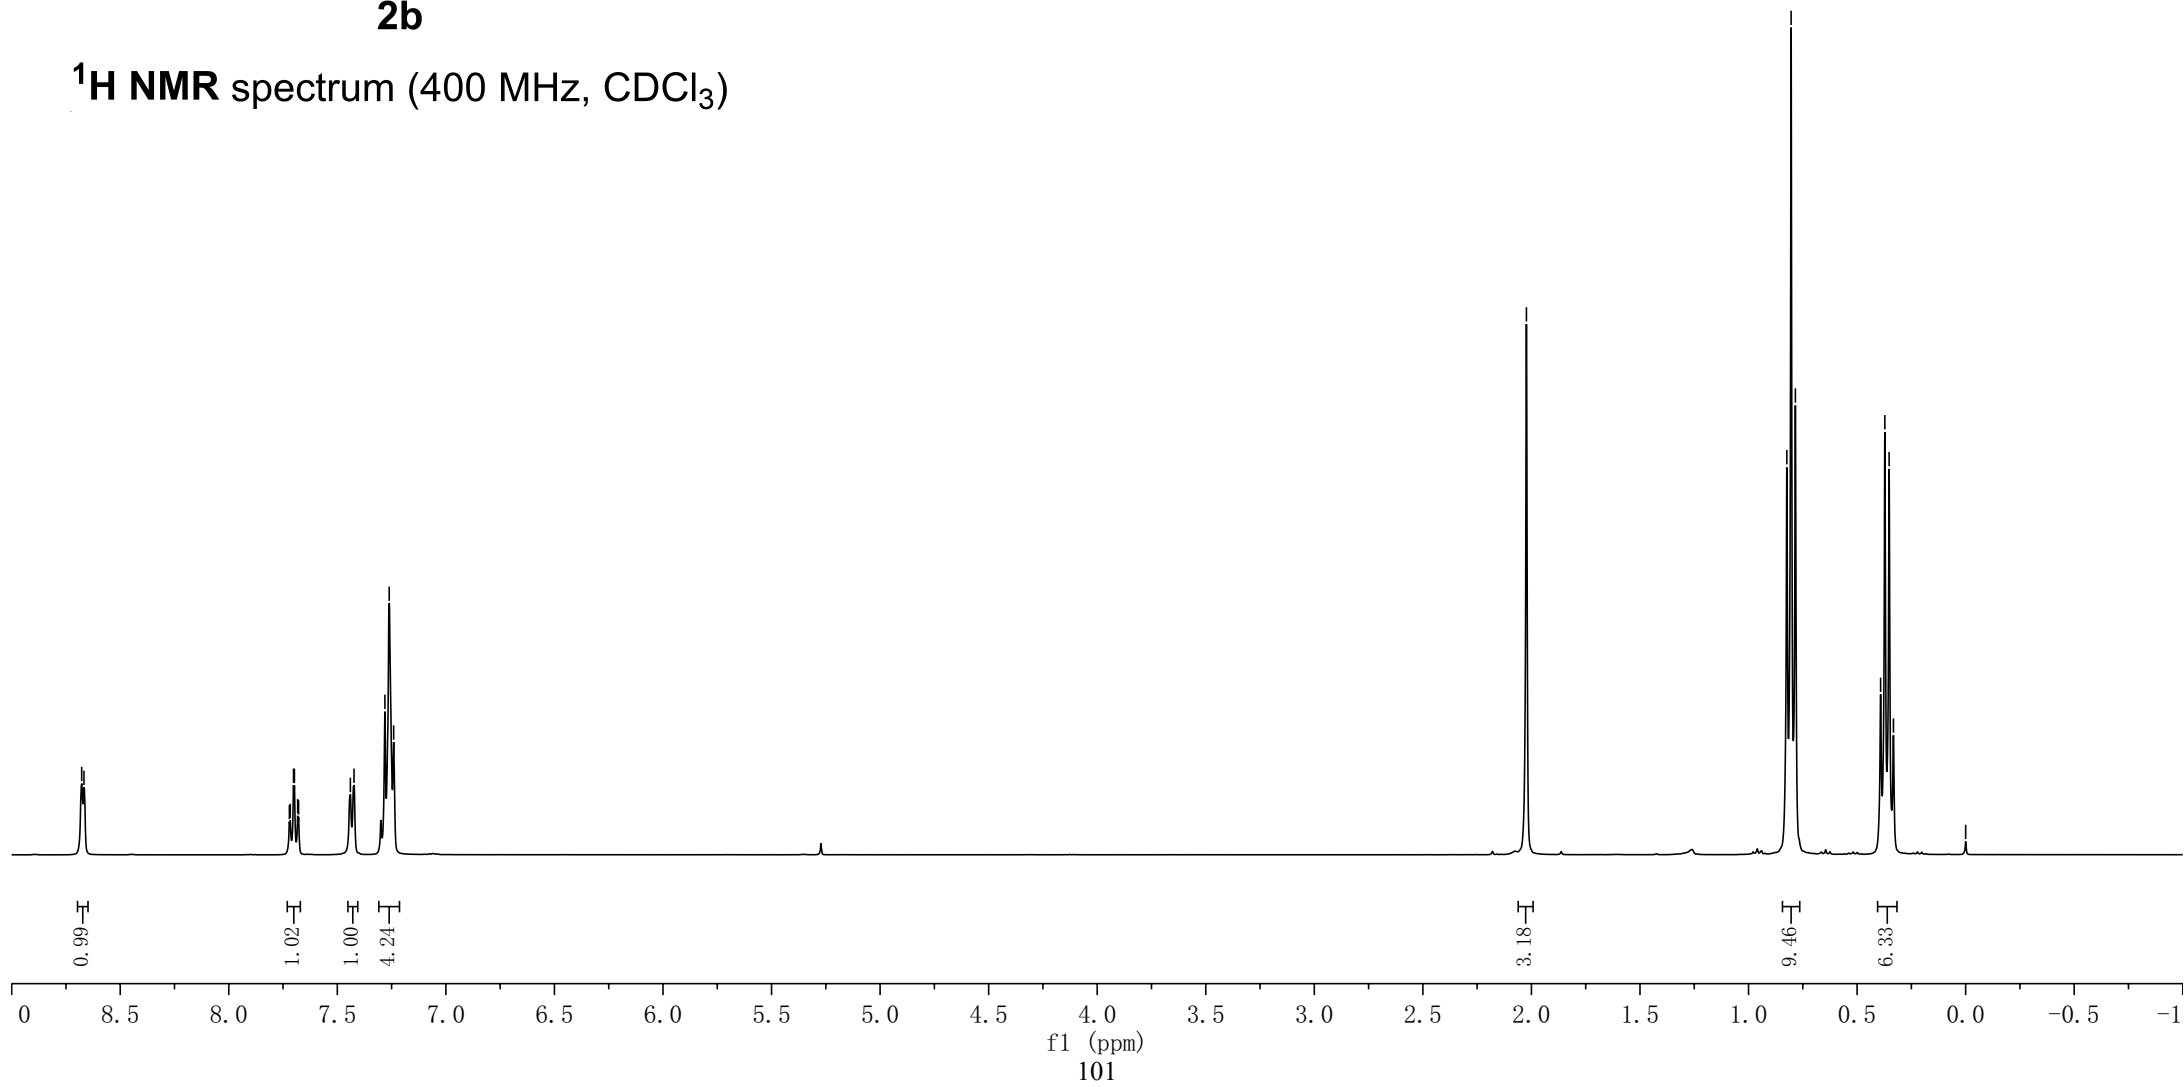

2.02  
0.82  
0.80  
0.78  
0.39  
0.37  
0.35  
0.33  
-0.00

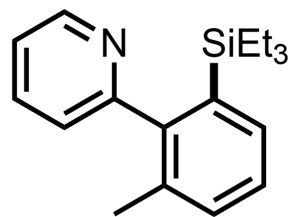

**2b**

<sup>13</sup>C NMR spectrum (100 MHz, CDCl<sub>3</sub>)

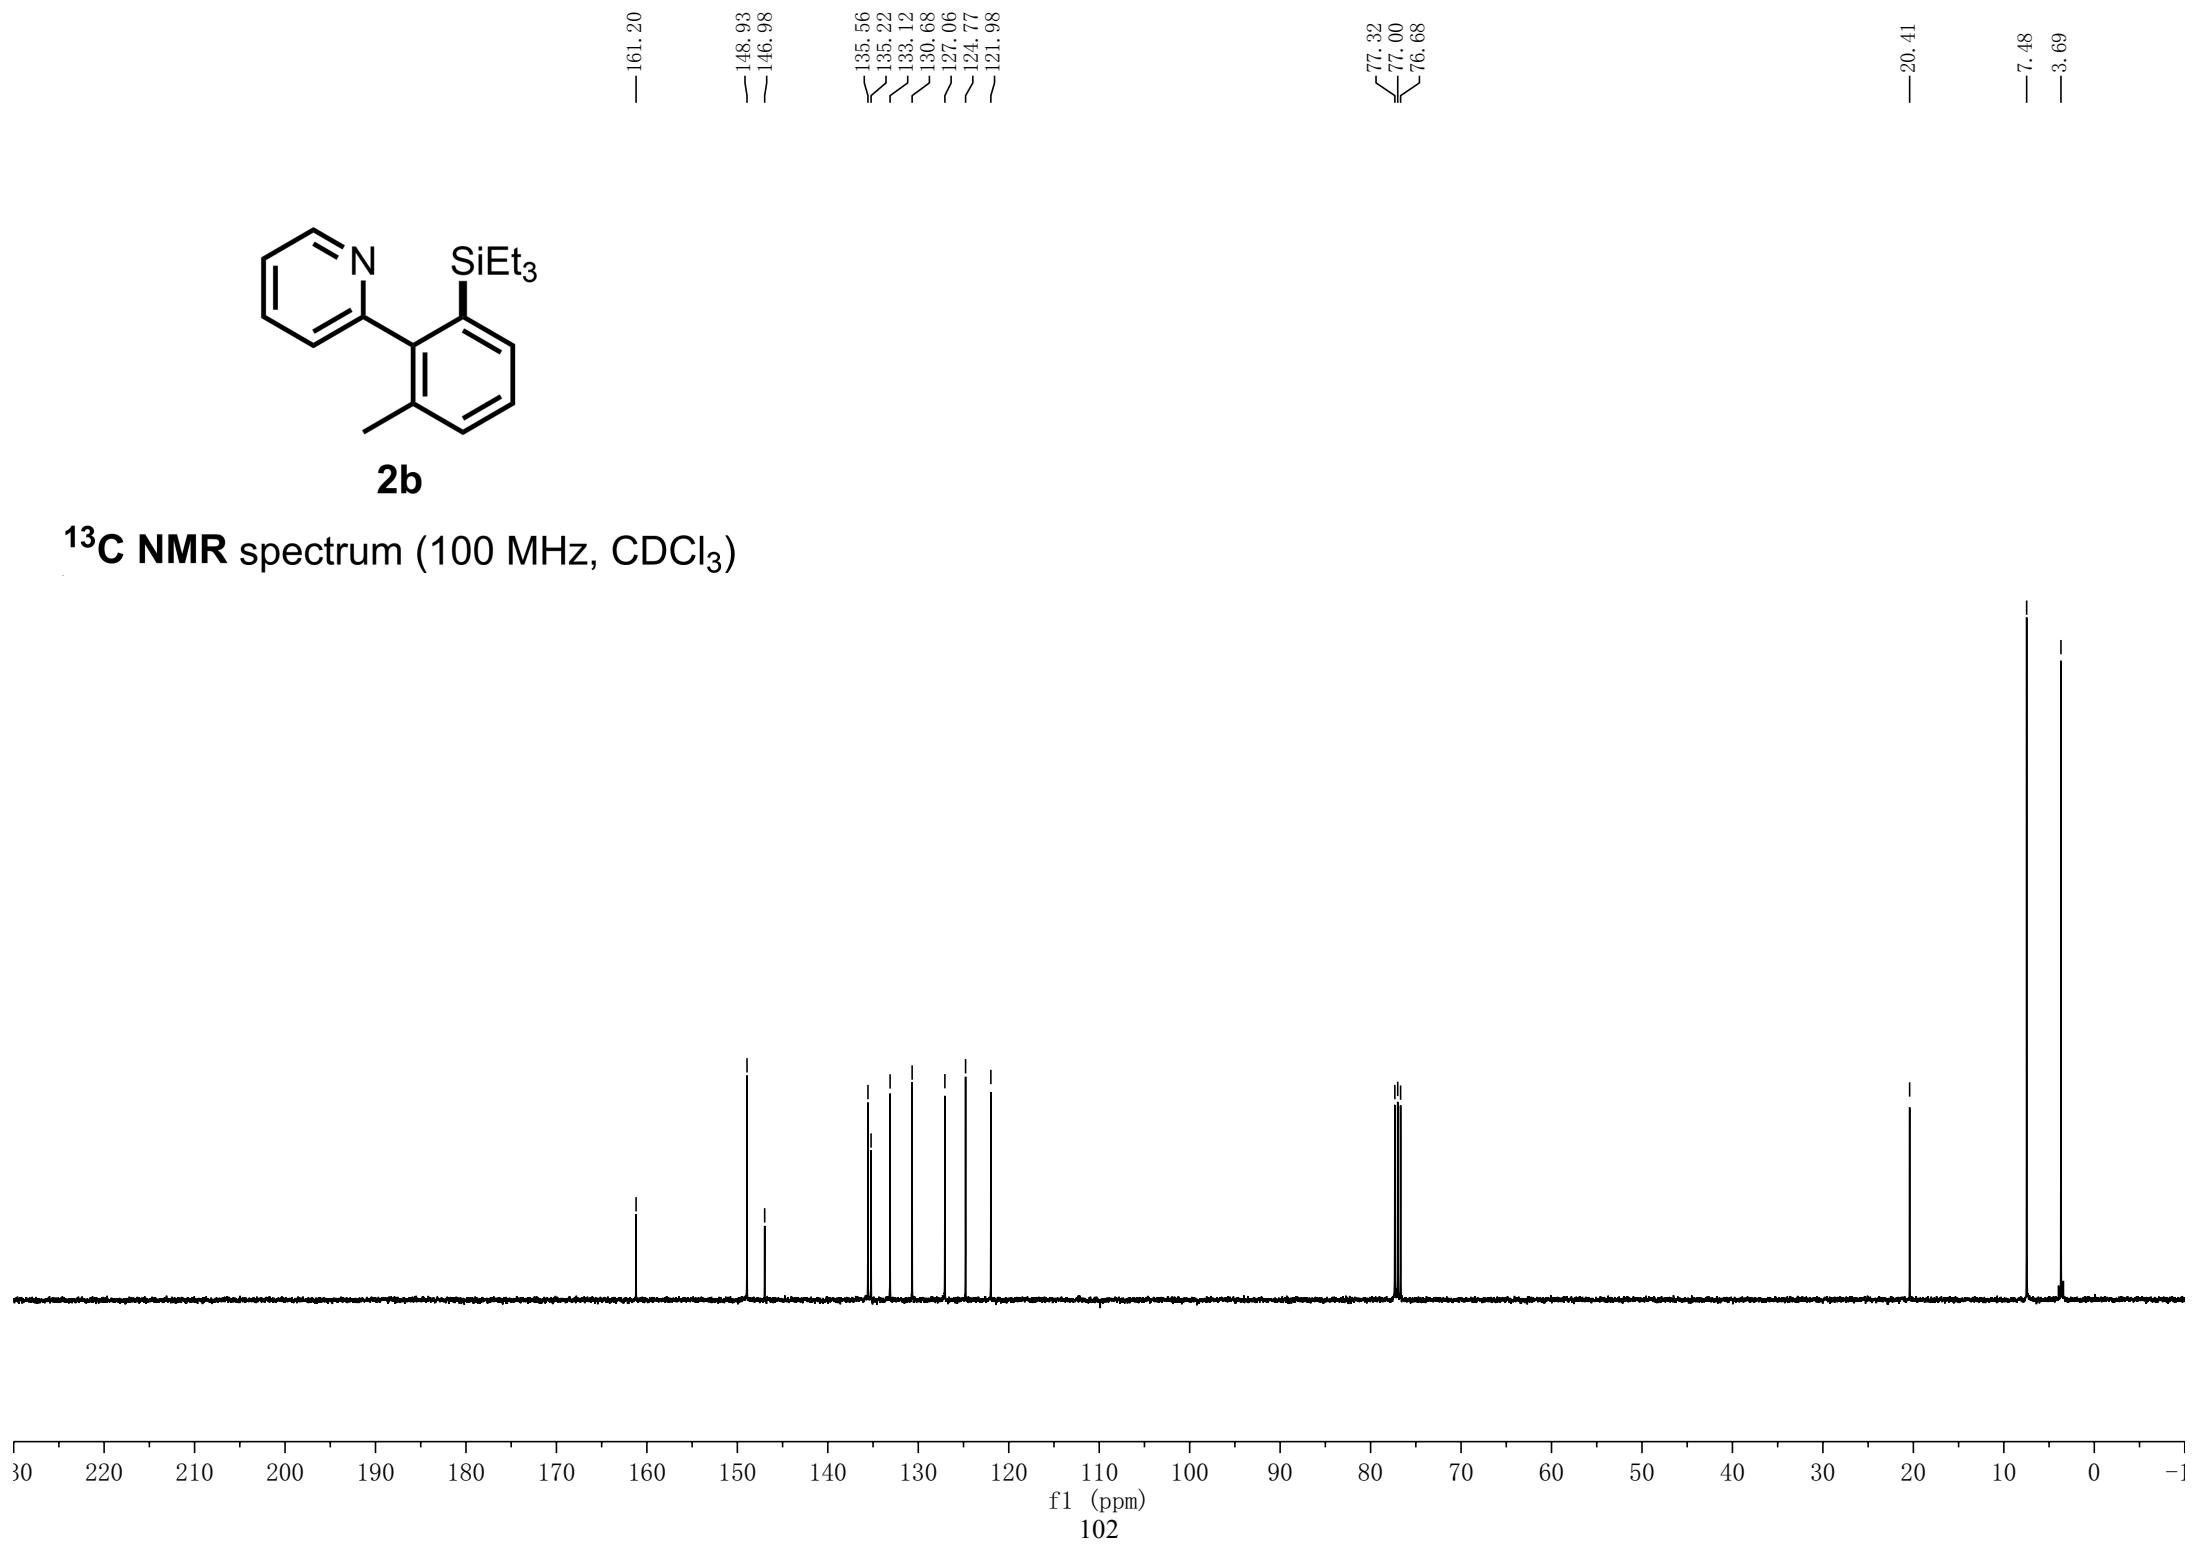

8.63  
8.63  
8.63  
8.62  
8.62  
8.61  
8.61  
7.72  
7.71  
7.71  
7.70  
7.70  
7.68  
7.68  
7.54  
7.52  
7.43  
7.41  
7.25  
7.25  
7.24  
7.24  
7.23  
7.22  
7.22  
7.21  
7.21  
7.19  
7.19

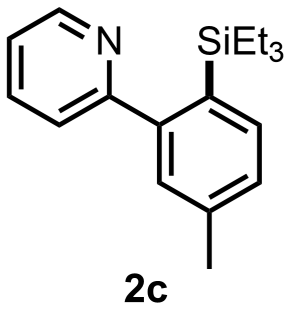

<sup>1</sup>H NMR spectrum (400 MHz, CDCl<sub>3</sub>)

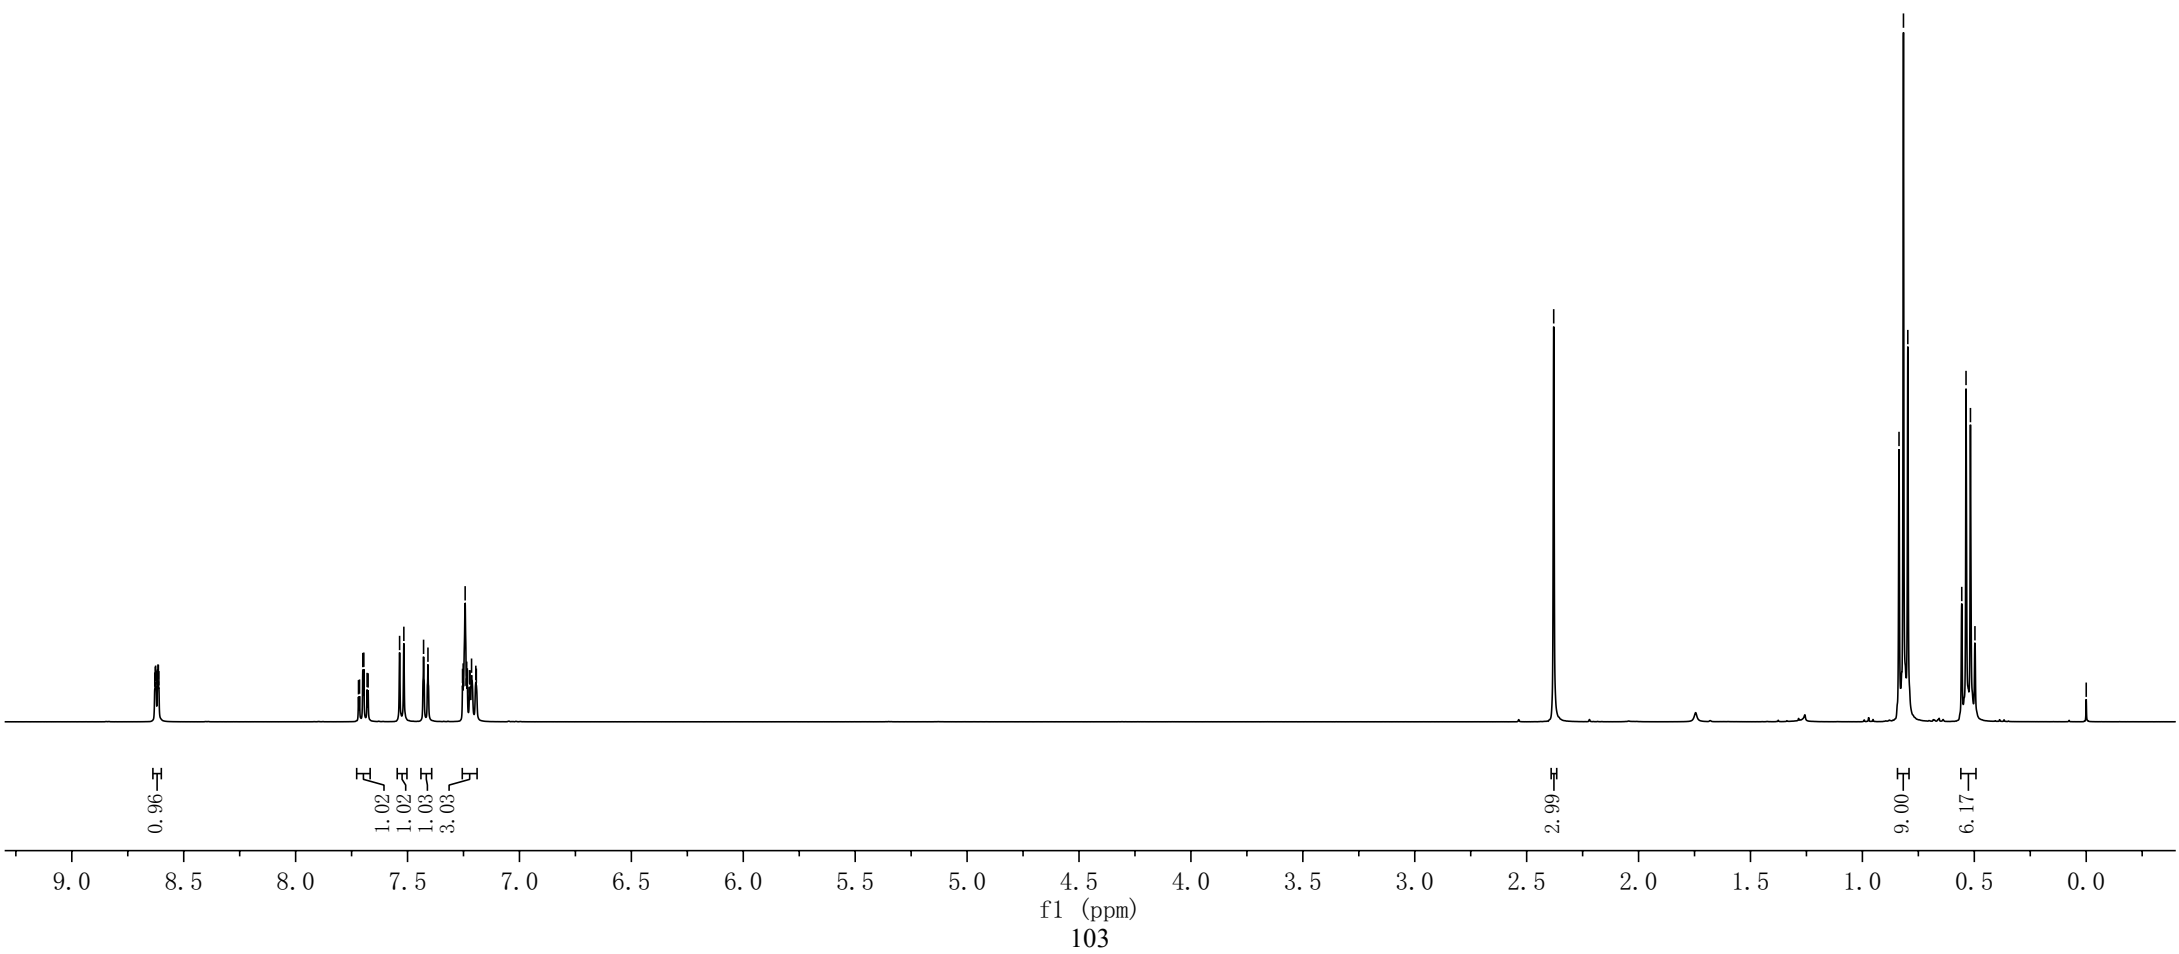

—2.38

0.84  
0.82  
0.80  
0.56  
0.54  
0.52  
0.50

—0.00

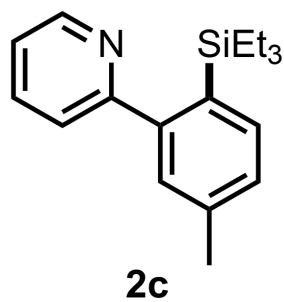

**<sup>13</sup>C NMR spectrum (100 MHz, CDCl<sub>3</sub>)**

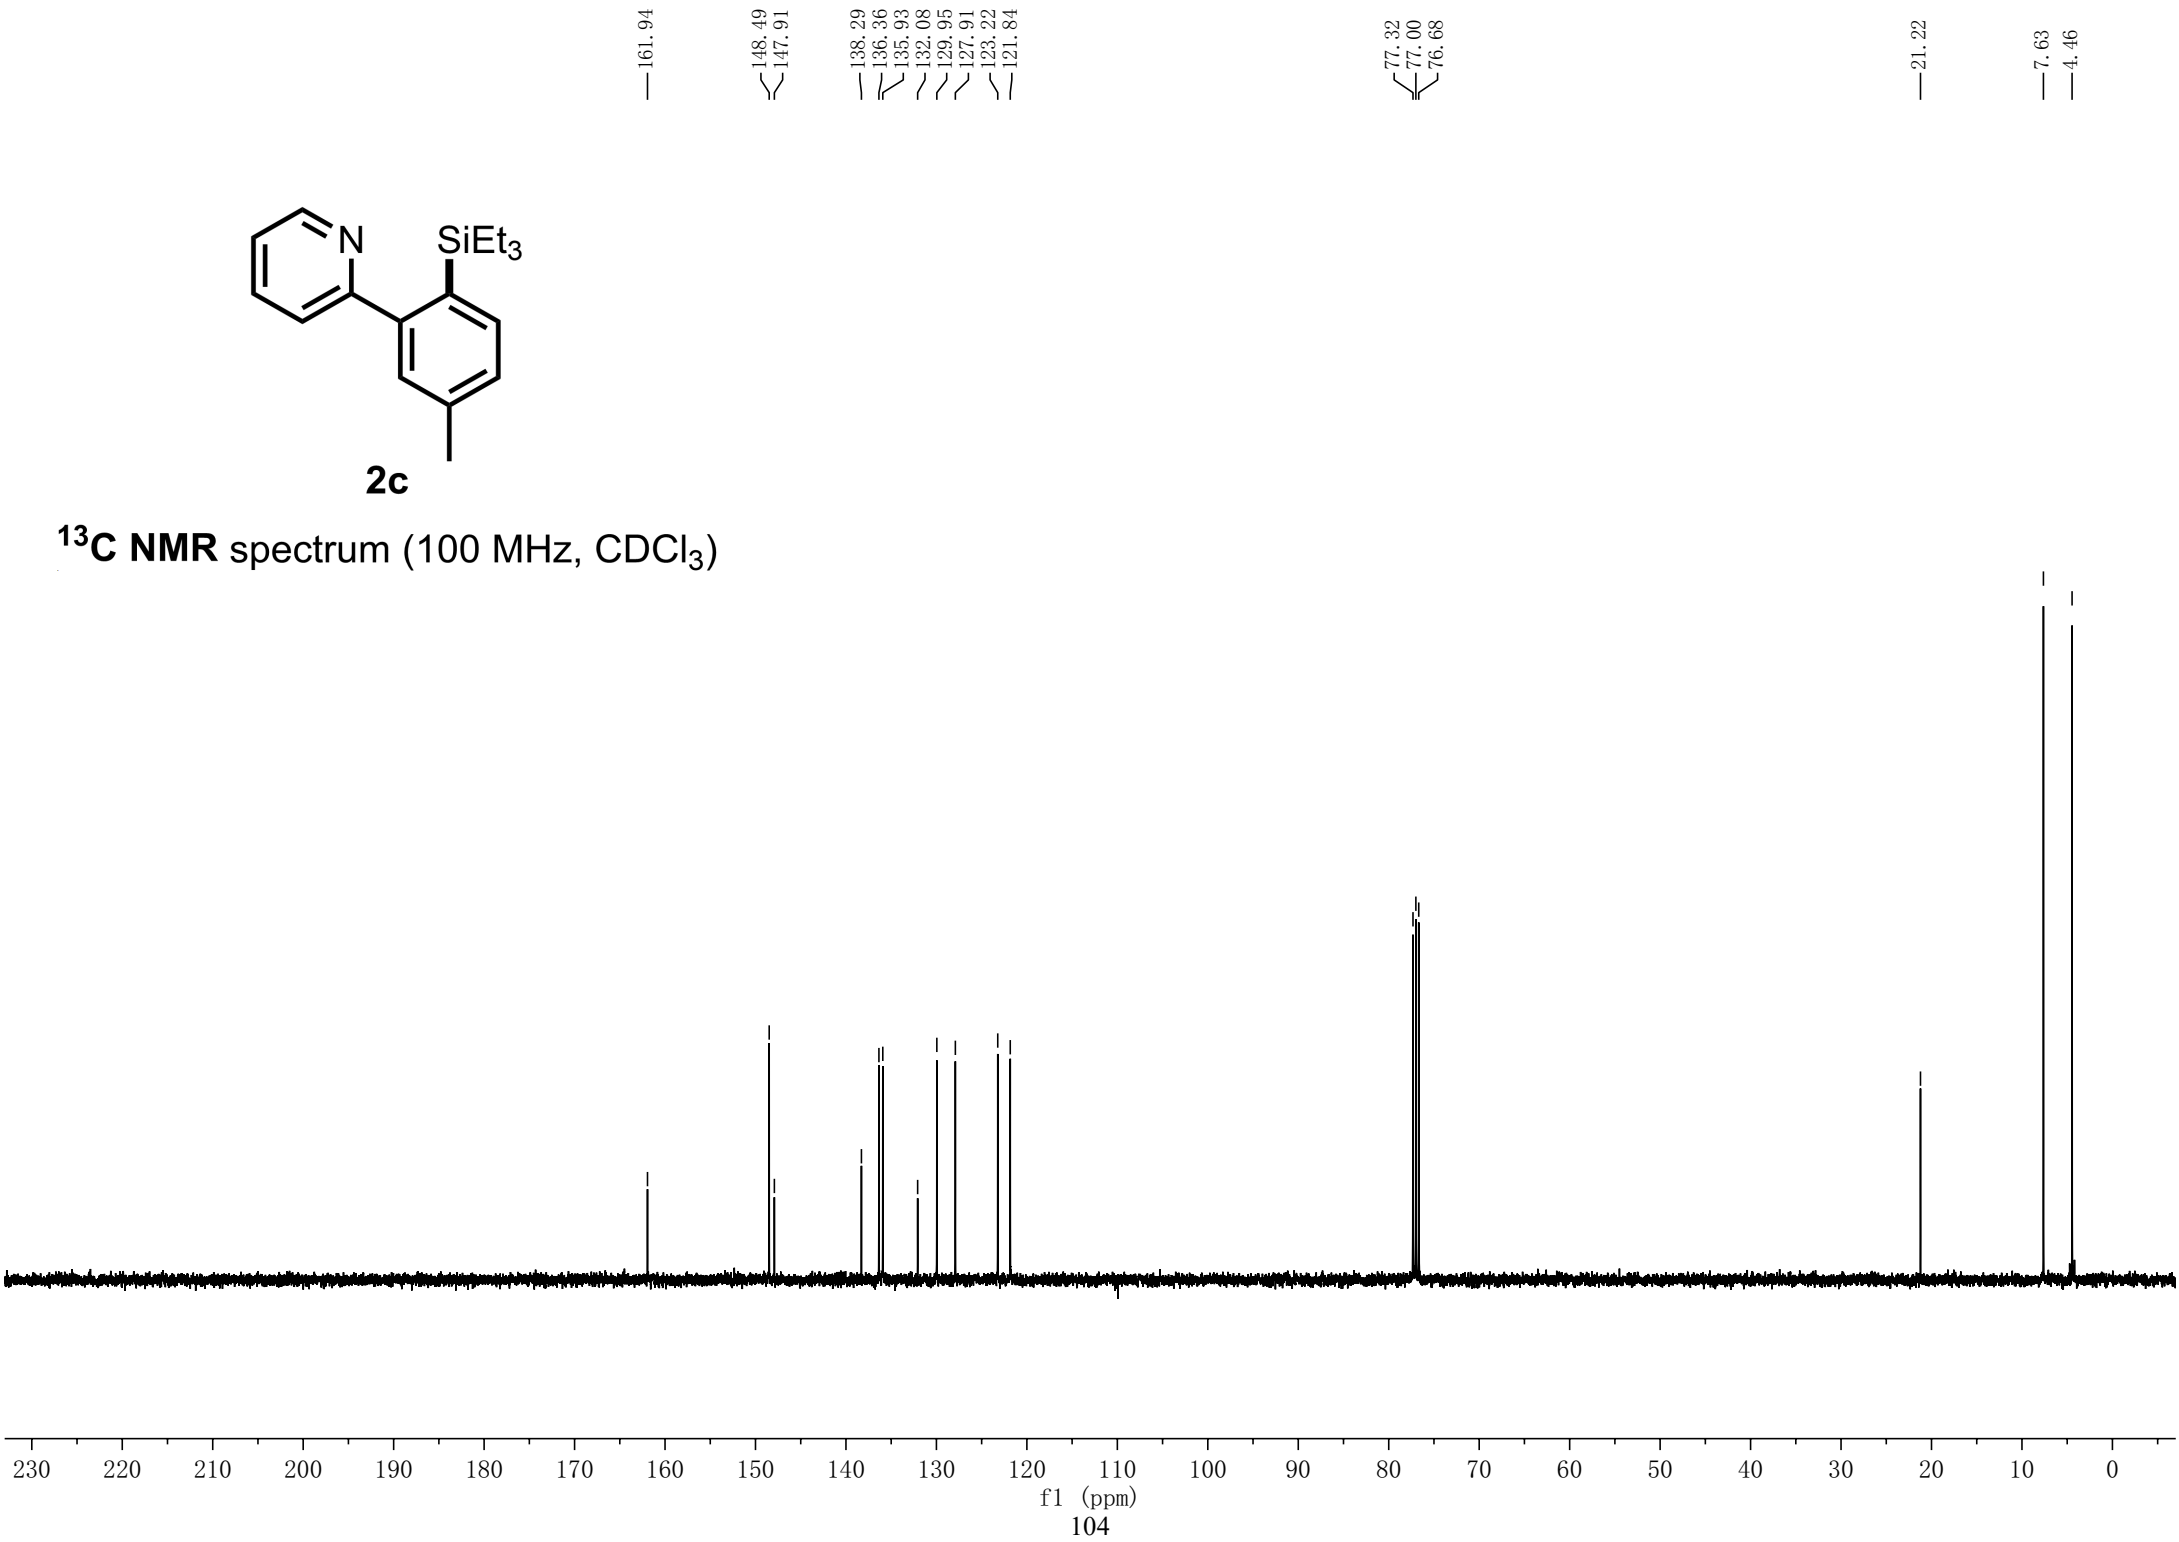



8.60  
8.59  
7.67  
7.66  
7.65  
7.64  
7.63  
7.63  
7.44  
7.41  
7.39  
7.33  
7.31  
7.22  
7.20  
7.18  
7.18  
7.16  
7.16

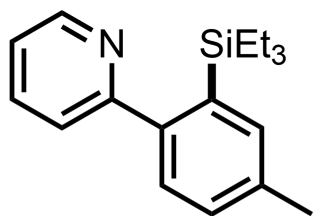

**2d**

<sup>1</sup>H NMR spectrum (400 MHz, CDCl<sub>3</sub>)

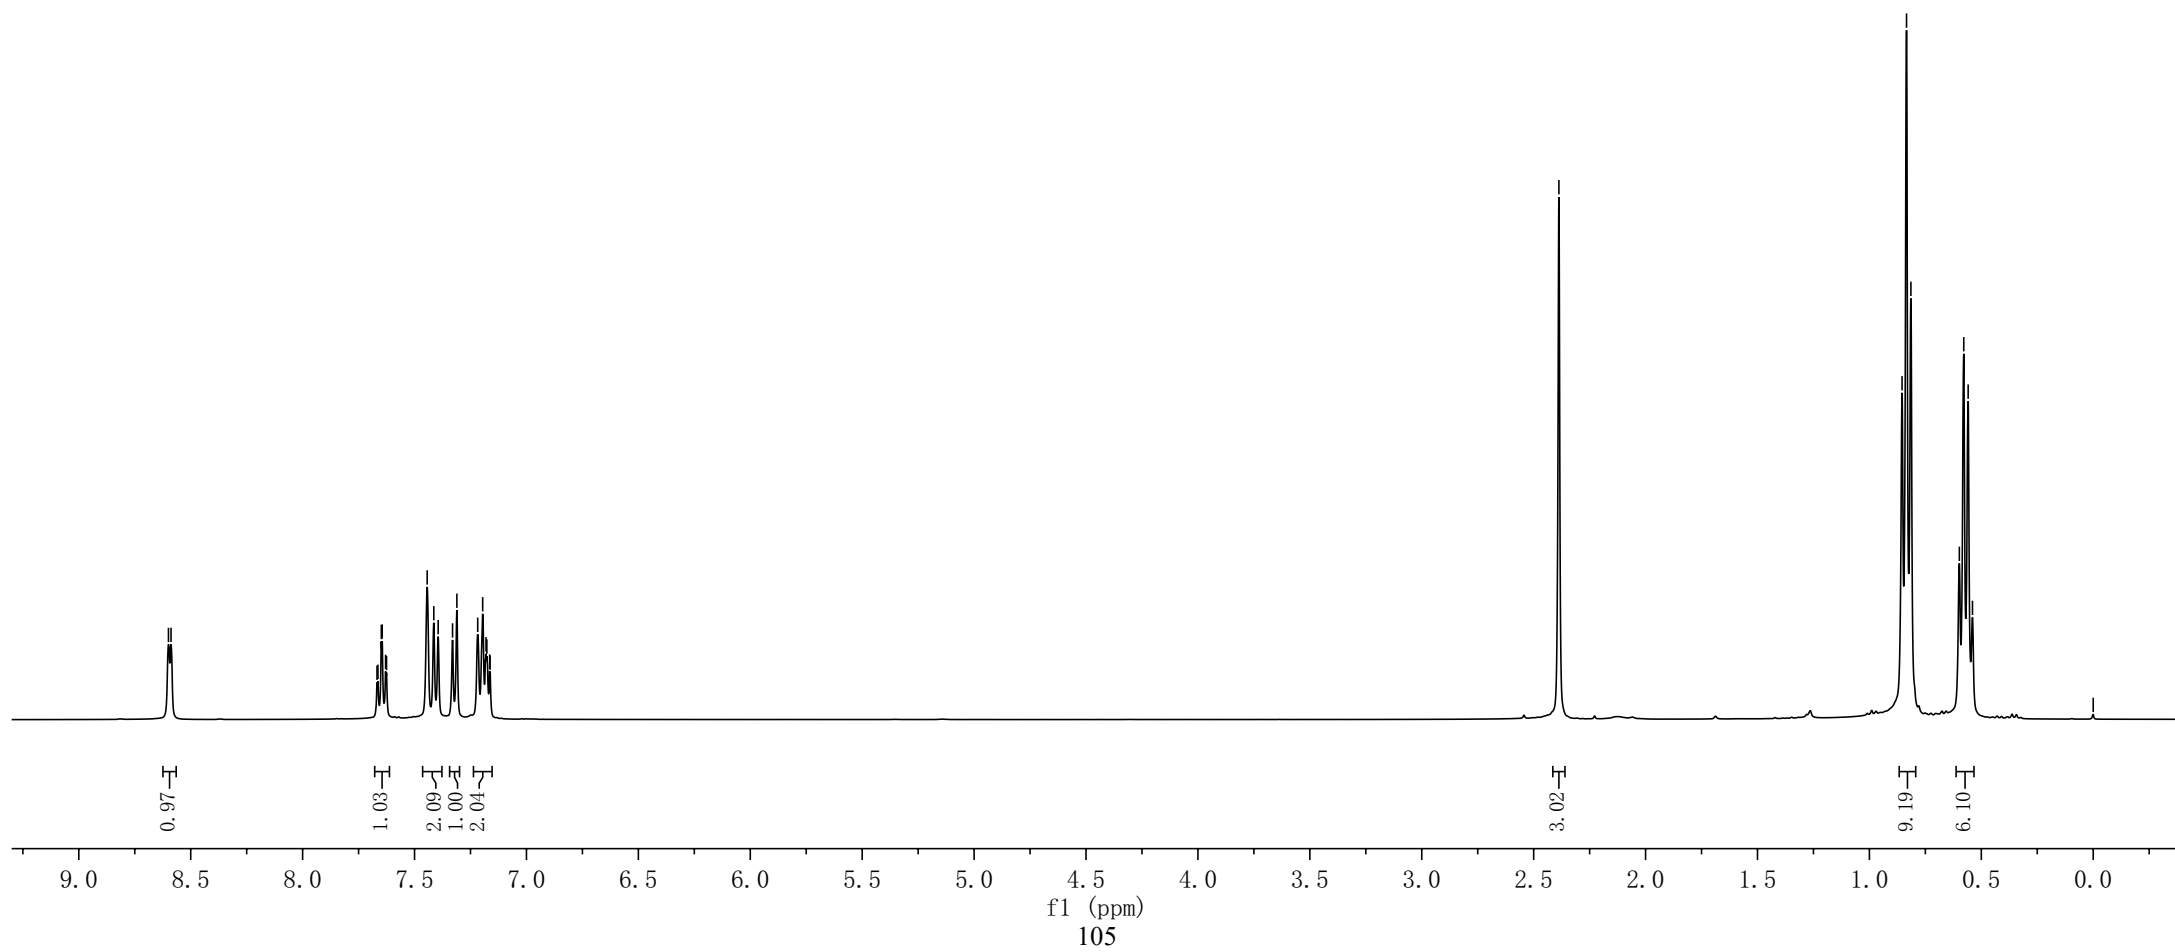

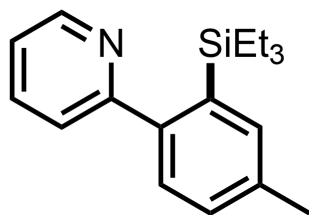

**2d**

**<sup>13</sup>C NMR spectrum (100 MHz, CDCl<sub>3</sub>)**

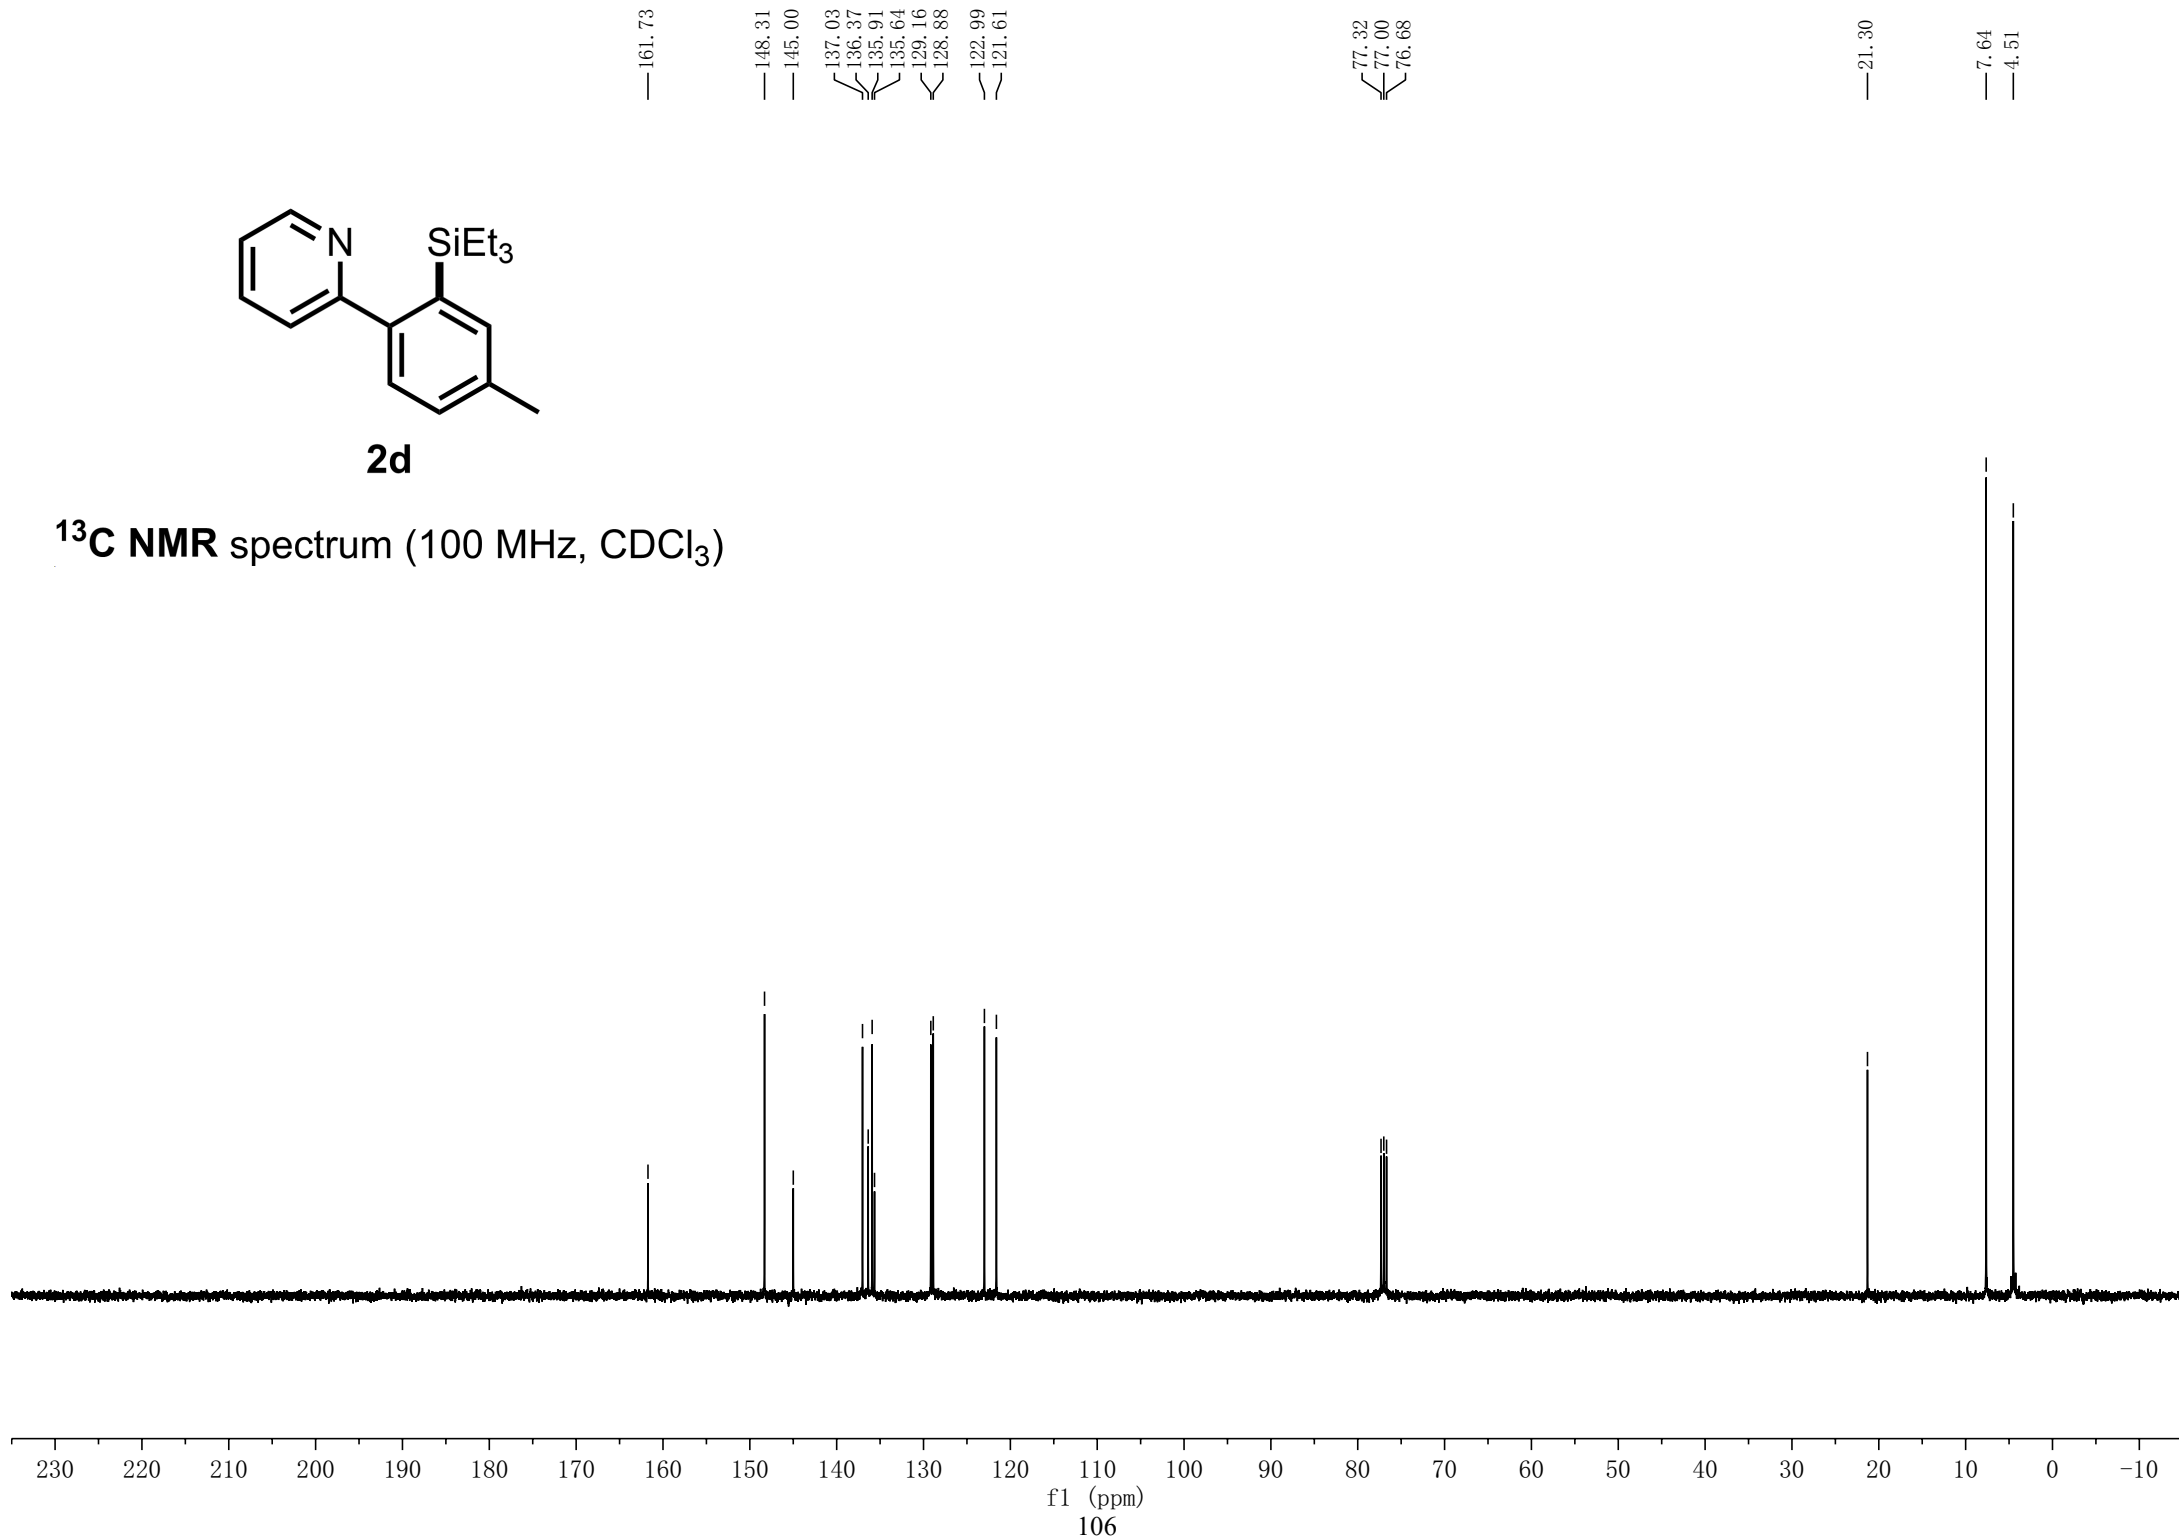

8.68  
8.67  
7.75  
7.75  
7.73  
7.73  
7.72  
7.71  
7.41  
7.39  
7.32  
7.31  
7.30  
7.29  
7.29  
7.14  
7.13  
7.11  
7.11  
6.90  
6.88  
6.87  
6.86  
6.85

0.83  
0.81  
0.79  
0.49  
0.47  
0.45  
0.43  
-0.00

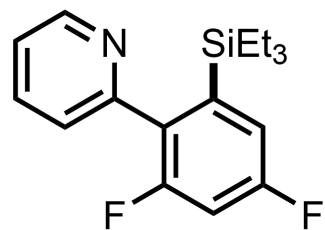

**2e**

**<sup>1</sup>H NMR spectrum (400 MHz, CDCl<sub>3</sub>)**

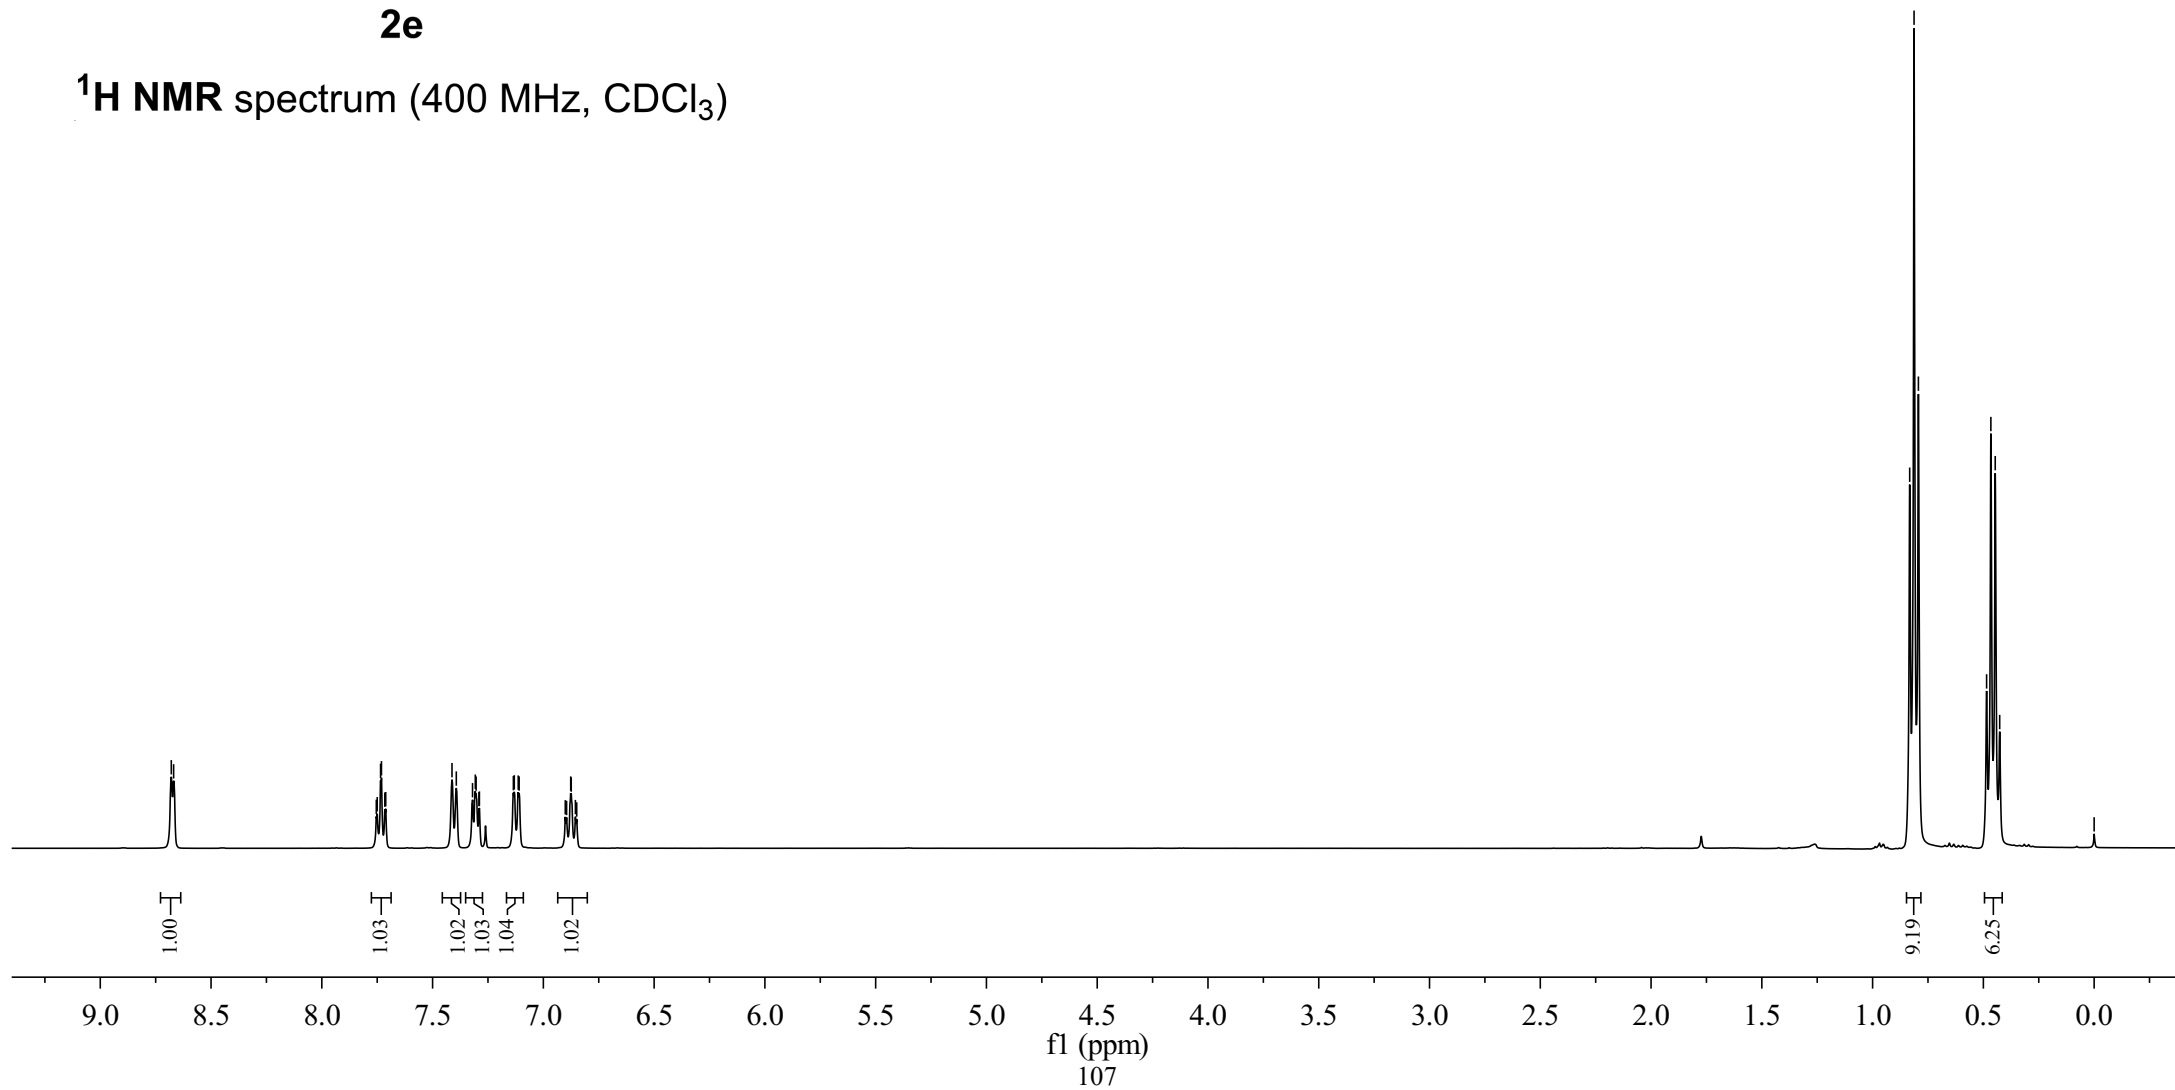

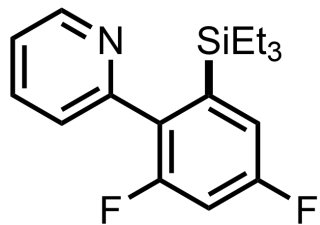

**2e**

<sup>13</sup>C NMR spectrum (100 MHz, CDCl<sub>3</sub>)

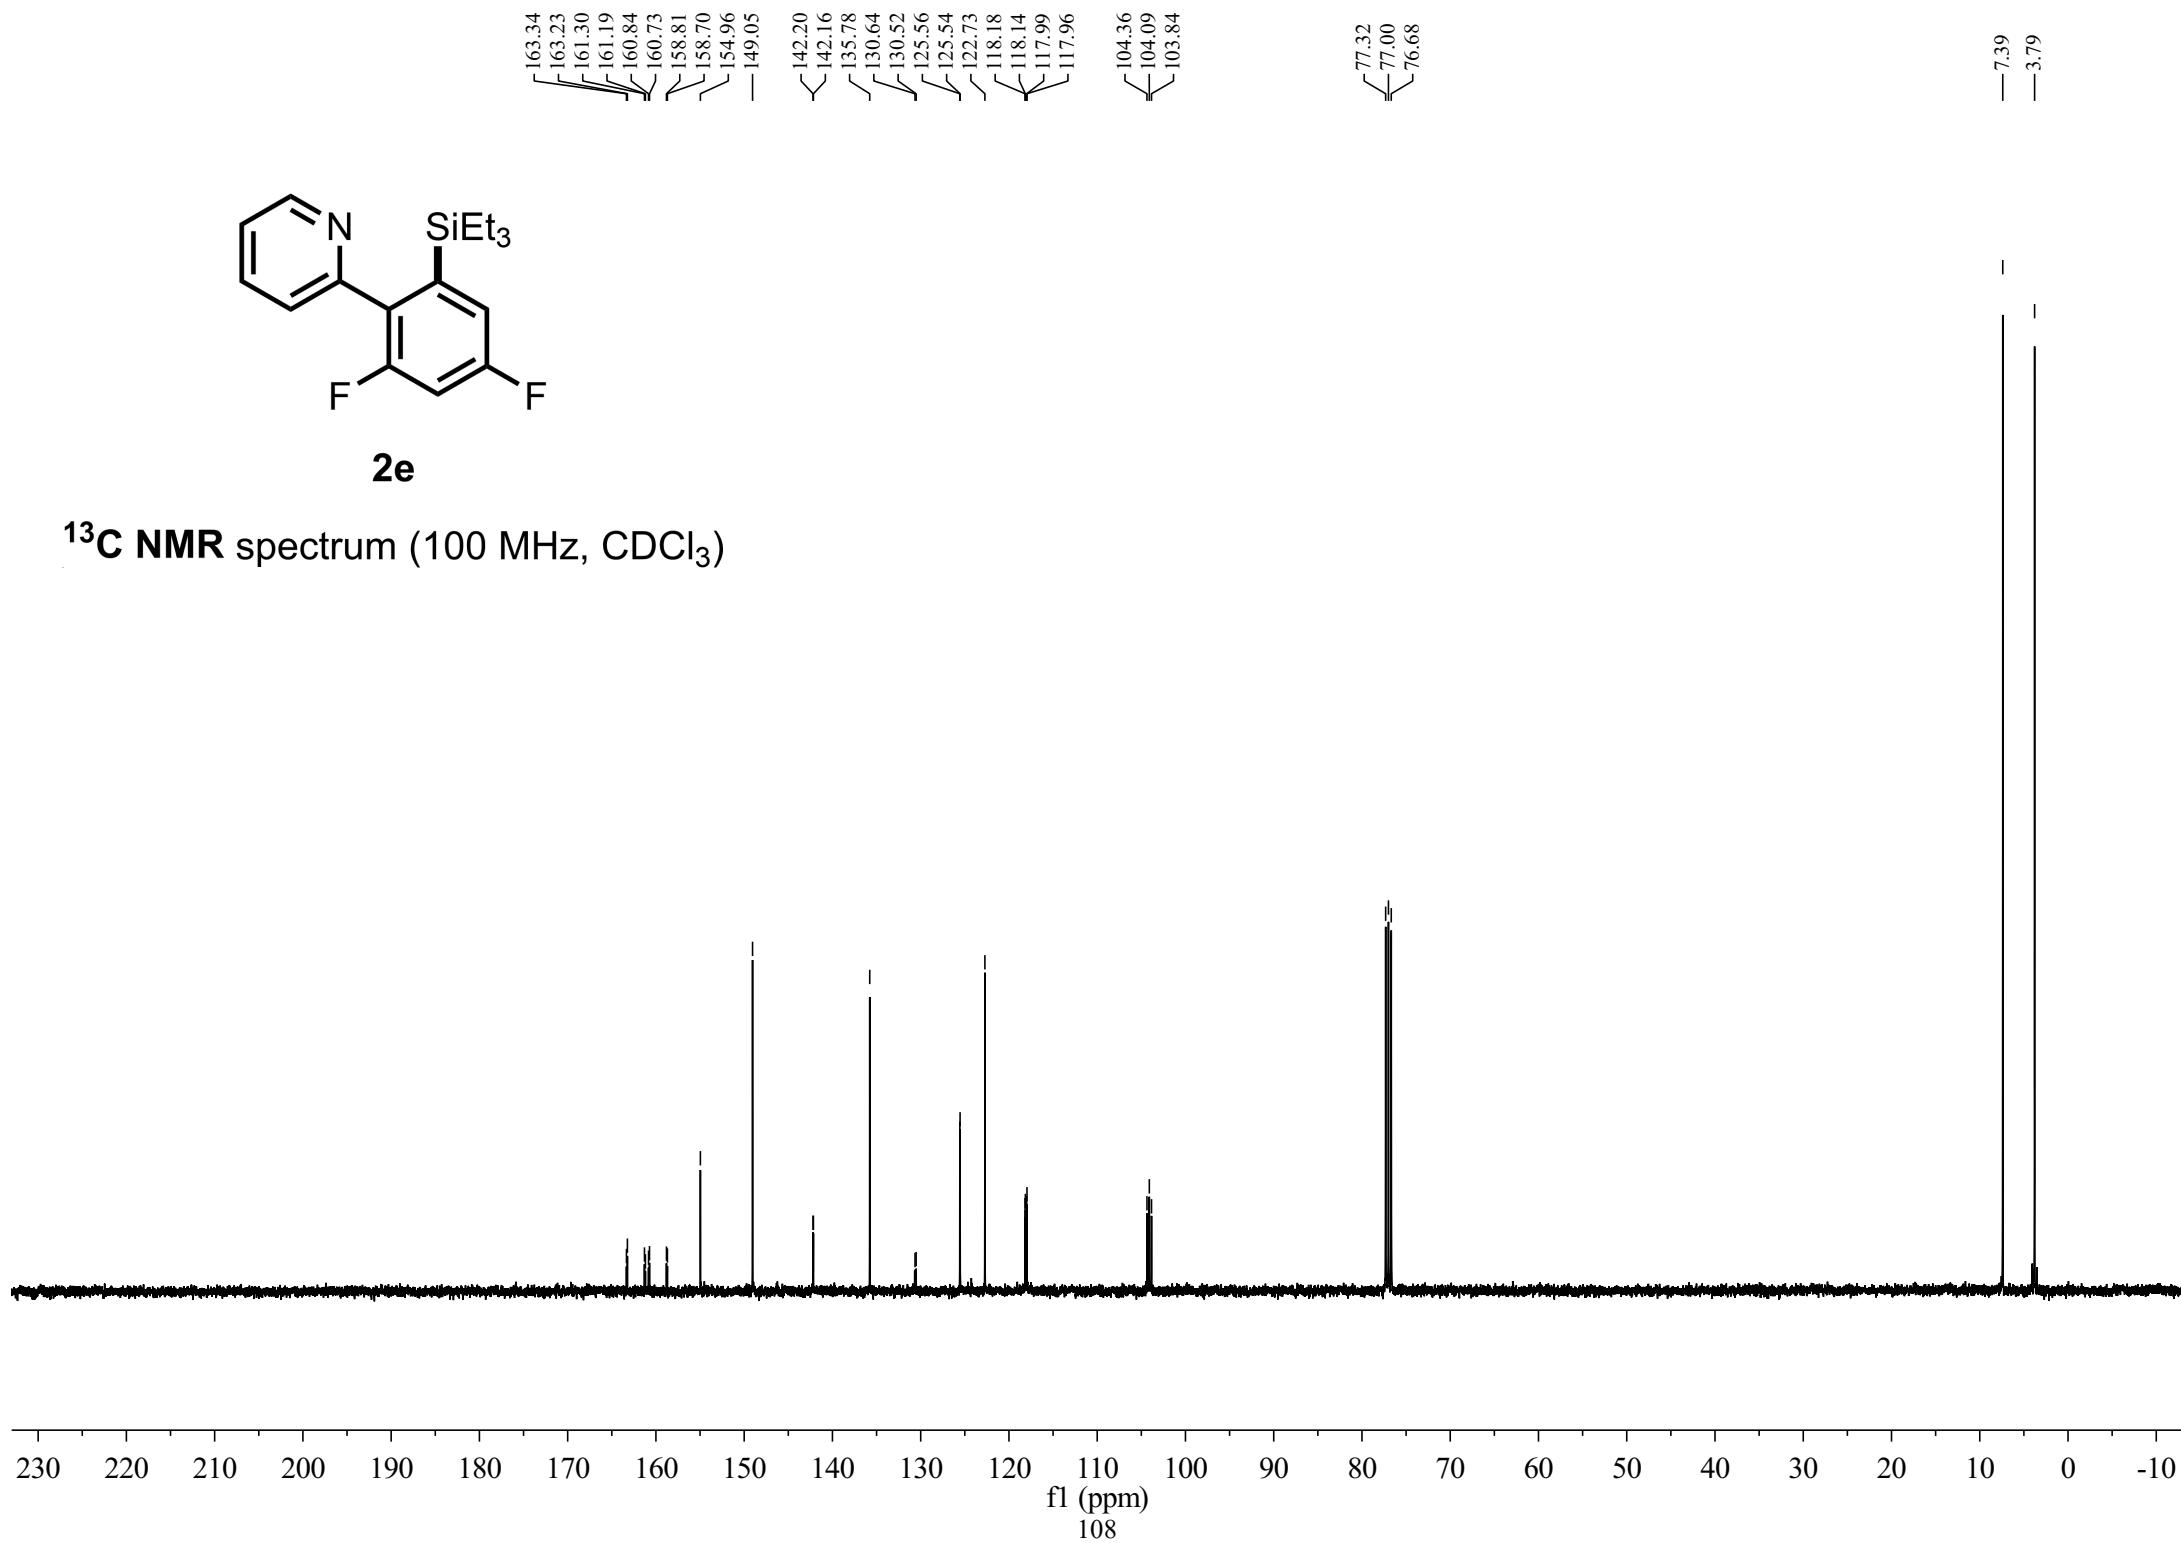

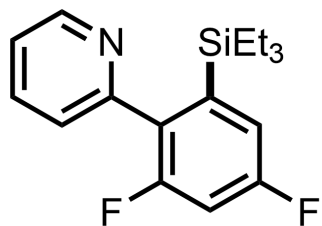

**2e**

<sup>19</sup>F NMR spectrum (376 MHz, CDCl<sub>3</sub>)

-111.03  
-111.05  
-112.18  
-112.20

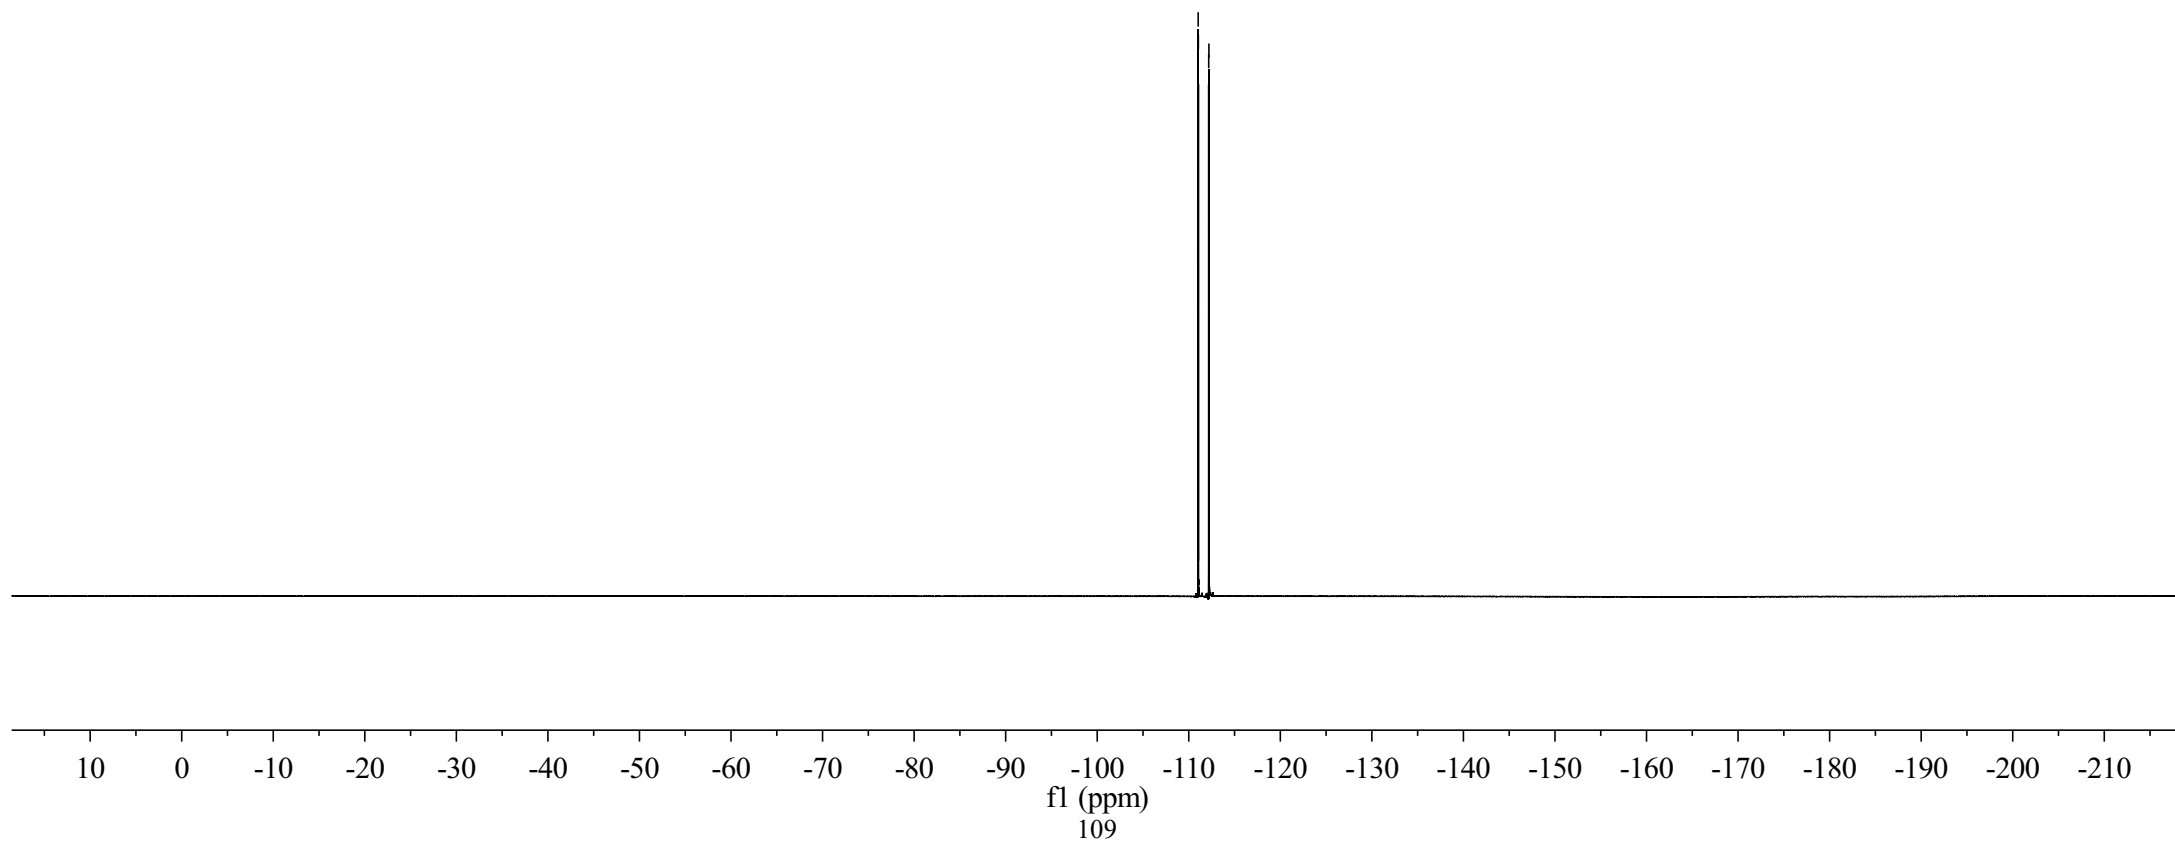

8.67  
8.67  
8.66  
8.66  
8.65  
8.65  
8.65  
7.87  
7.87  
7.79  
7.79  
7.77  
7.77  
7.75  
7.75  
7.68  
7.68  
7.66  
7.66  
7.54  
7.52  
7.47  
7.47  
7.47  
7.45  
7.45  
7.45  
7.33  
7.33  
7.32  
7.32  
7.31  
7.31  
7.30  
7.30

0.84  
0.82  
0.81  
0.60  
0.58  
0.56  
0.54  
-0.00

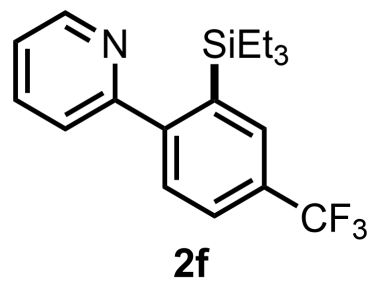

**<sup>1</sup>H NMR spectrum (400 MHz, CDCl<sub>3</sub>)**

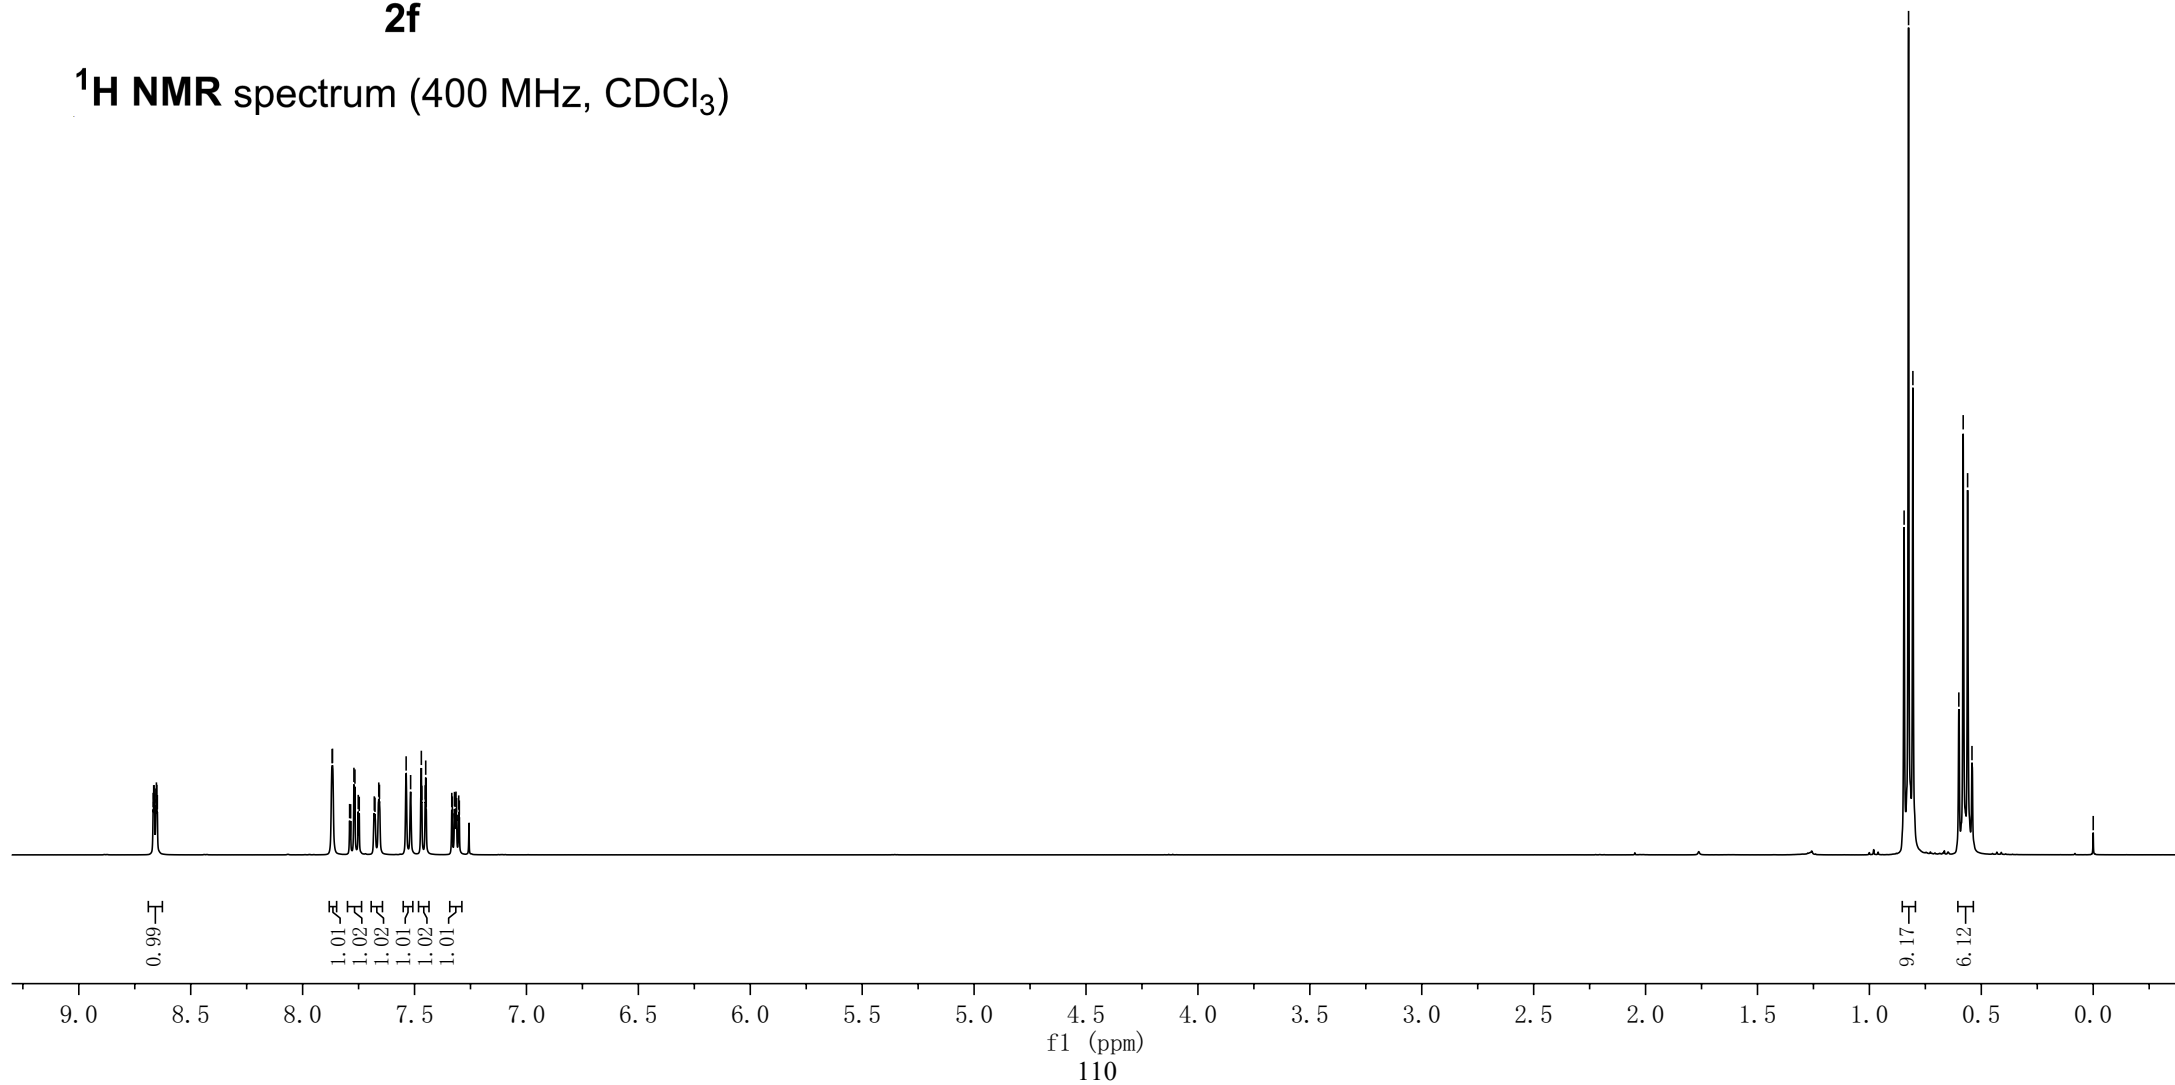

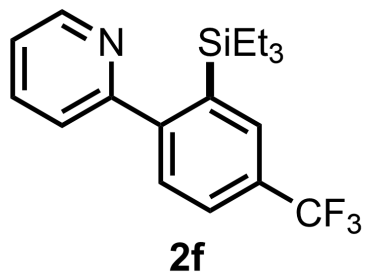

<sup>13</sup>C NMR spectrum (100 MHz, CDCl<sub>3</sub>)

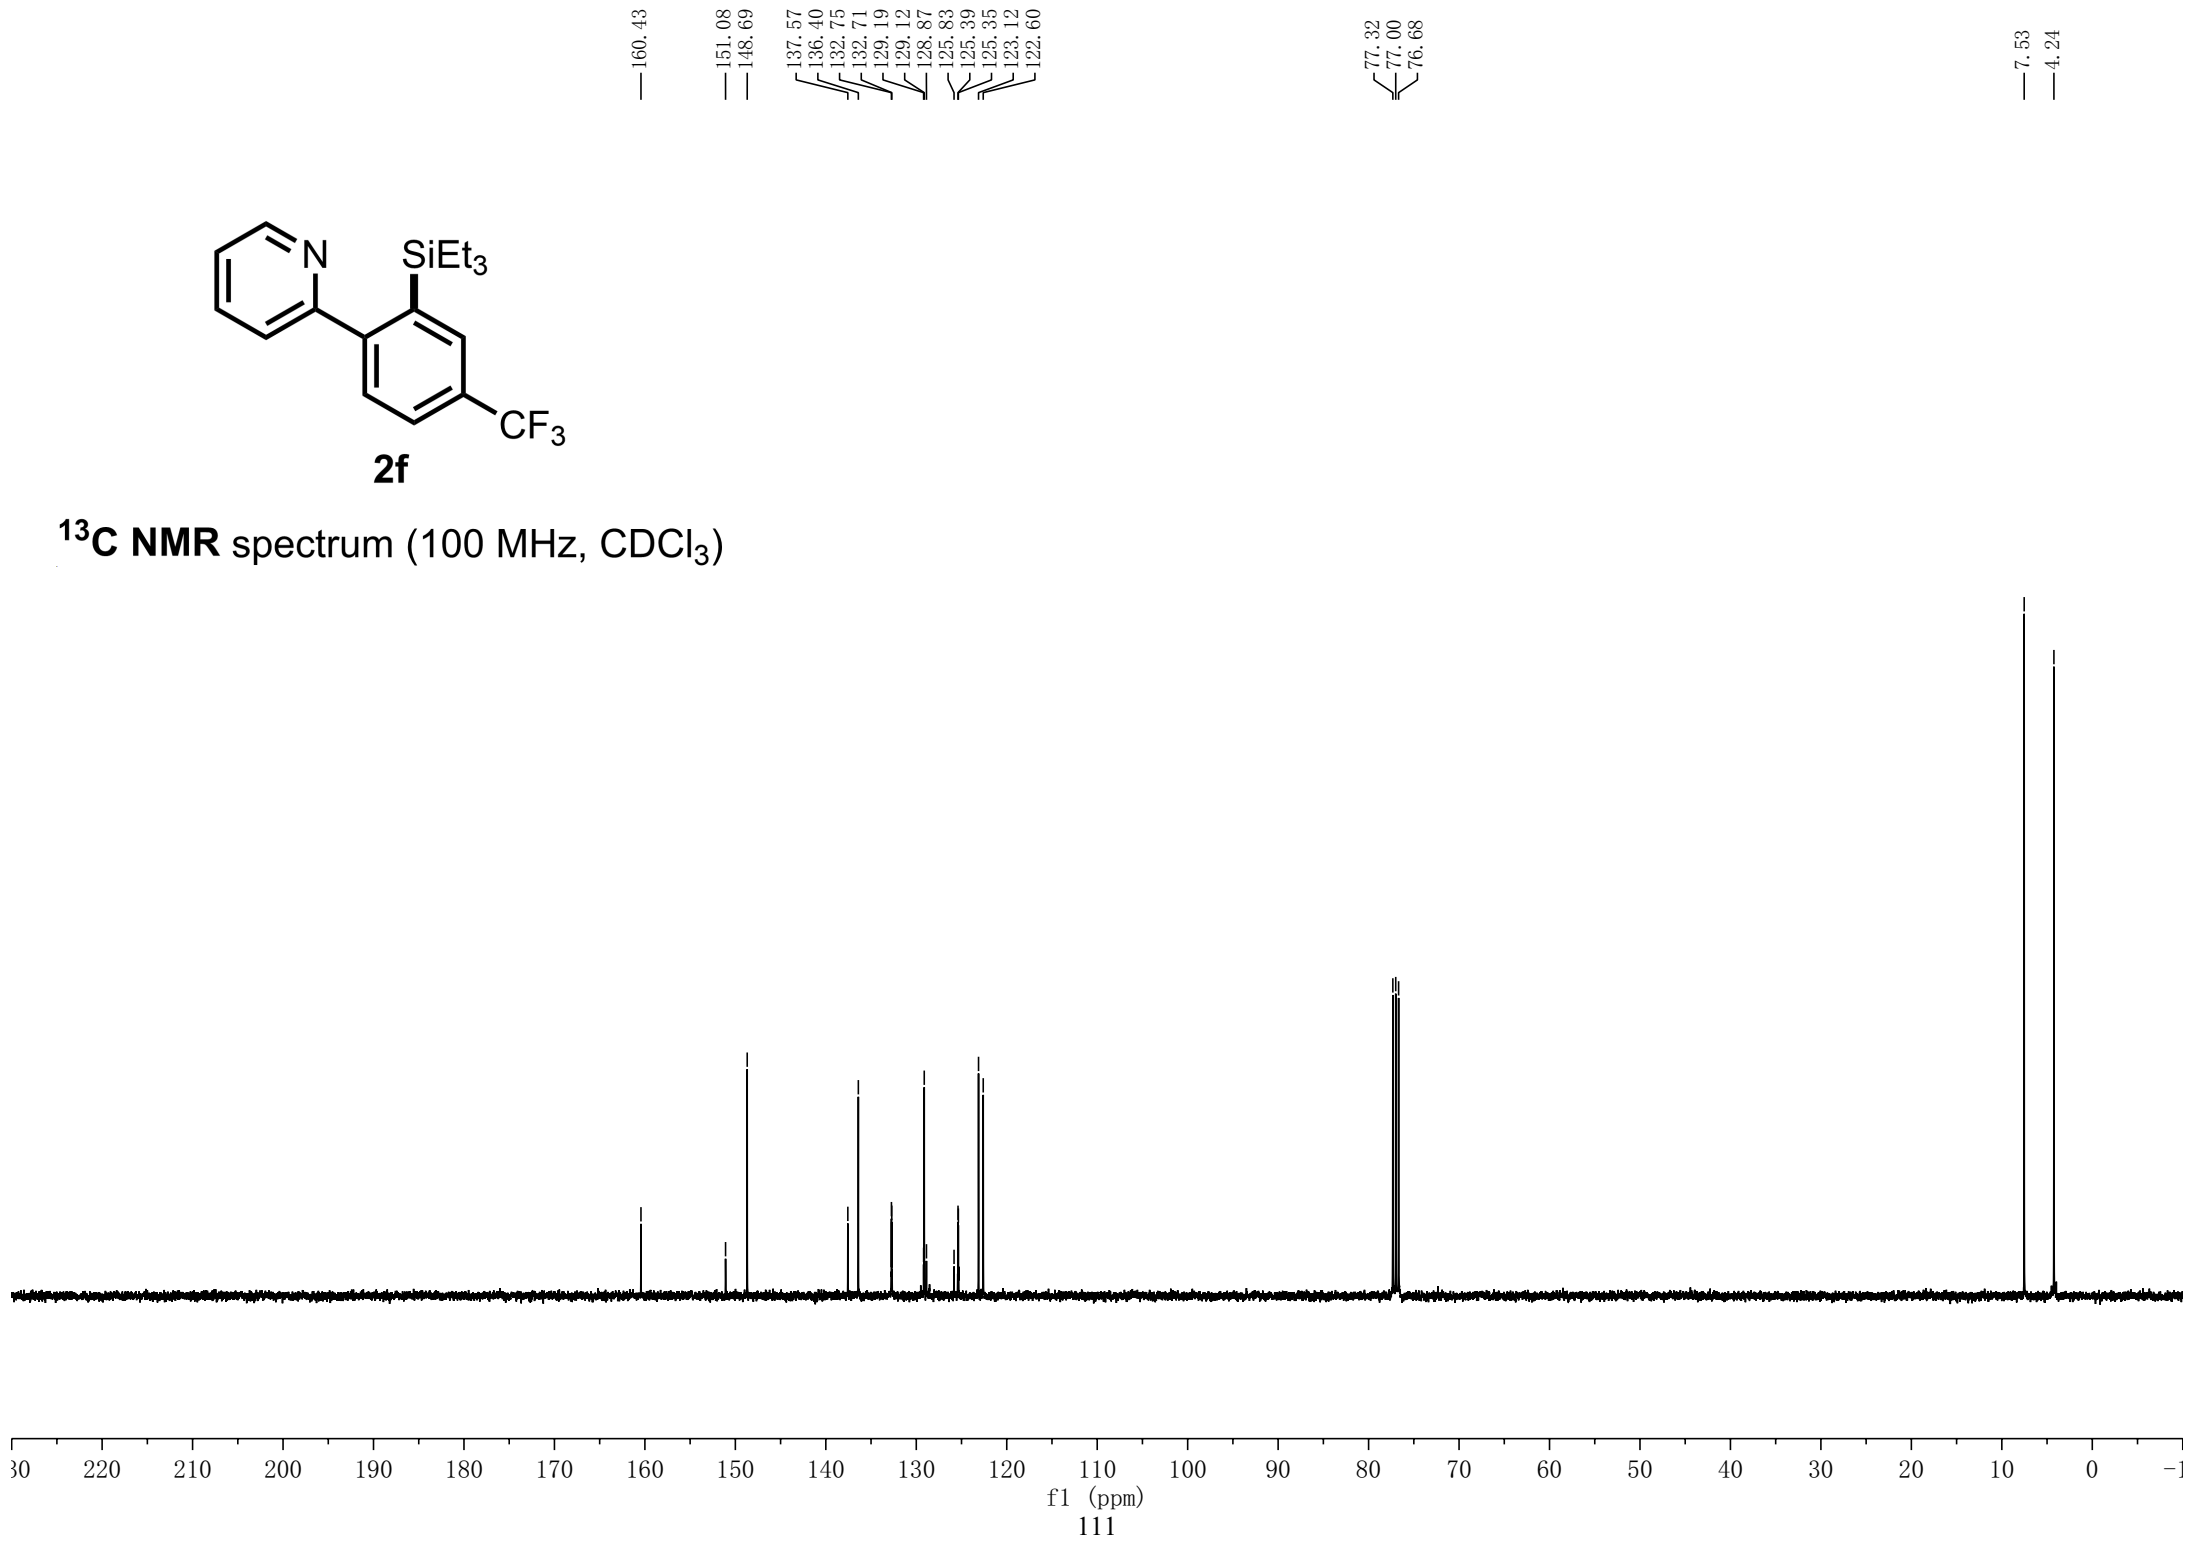

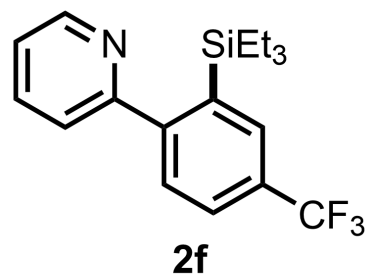

**<sup>19</sup>F NMR spectrum (564 MHz, CDCl<sub>3</sub>)**

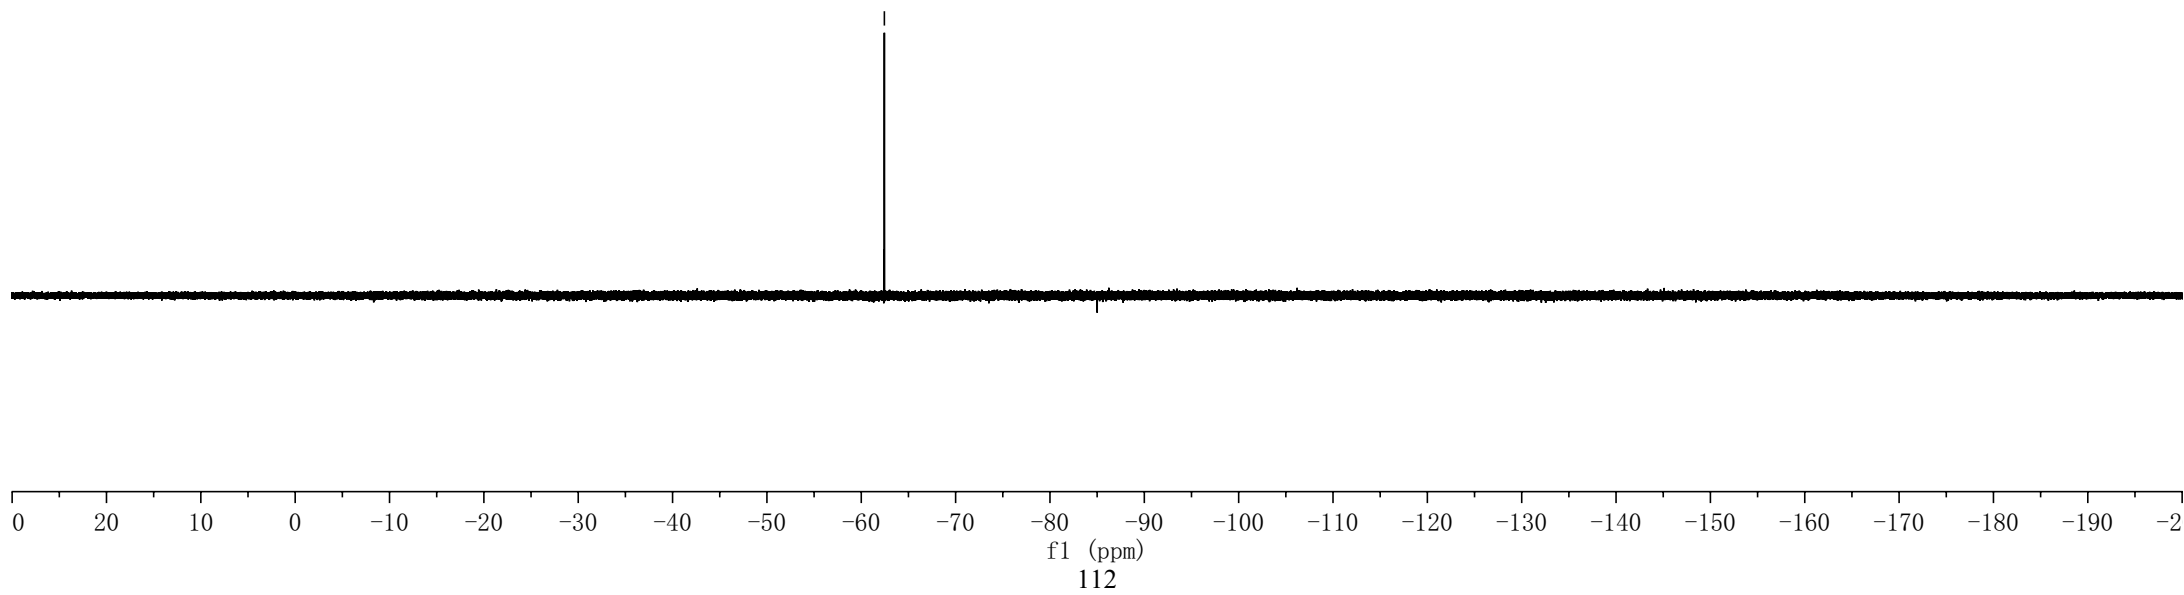



8.60  
8.59  
7.71  
7.70  
7.69  
7.68  
7.67  
7.66  
7.41  
7.39  
7.20  
6.99  
6.94  
6.93  
6.92

3.85

0.85  
0.83  
0.81  
0.60  
0.59  
0.57  
0.55  
0.00

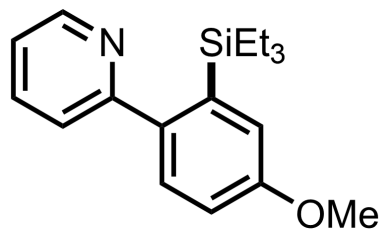

**2g**

<sup>1</sup>H NMR spectrum (400 MHz, CDCl<sub>3</sub>)

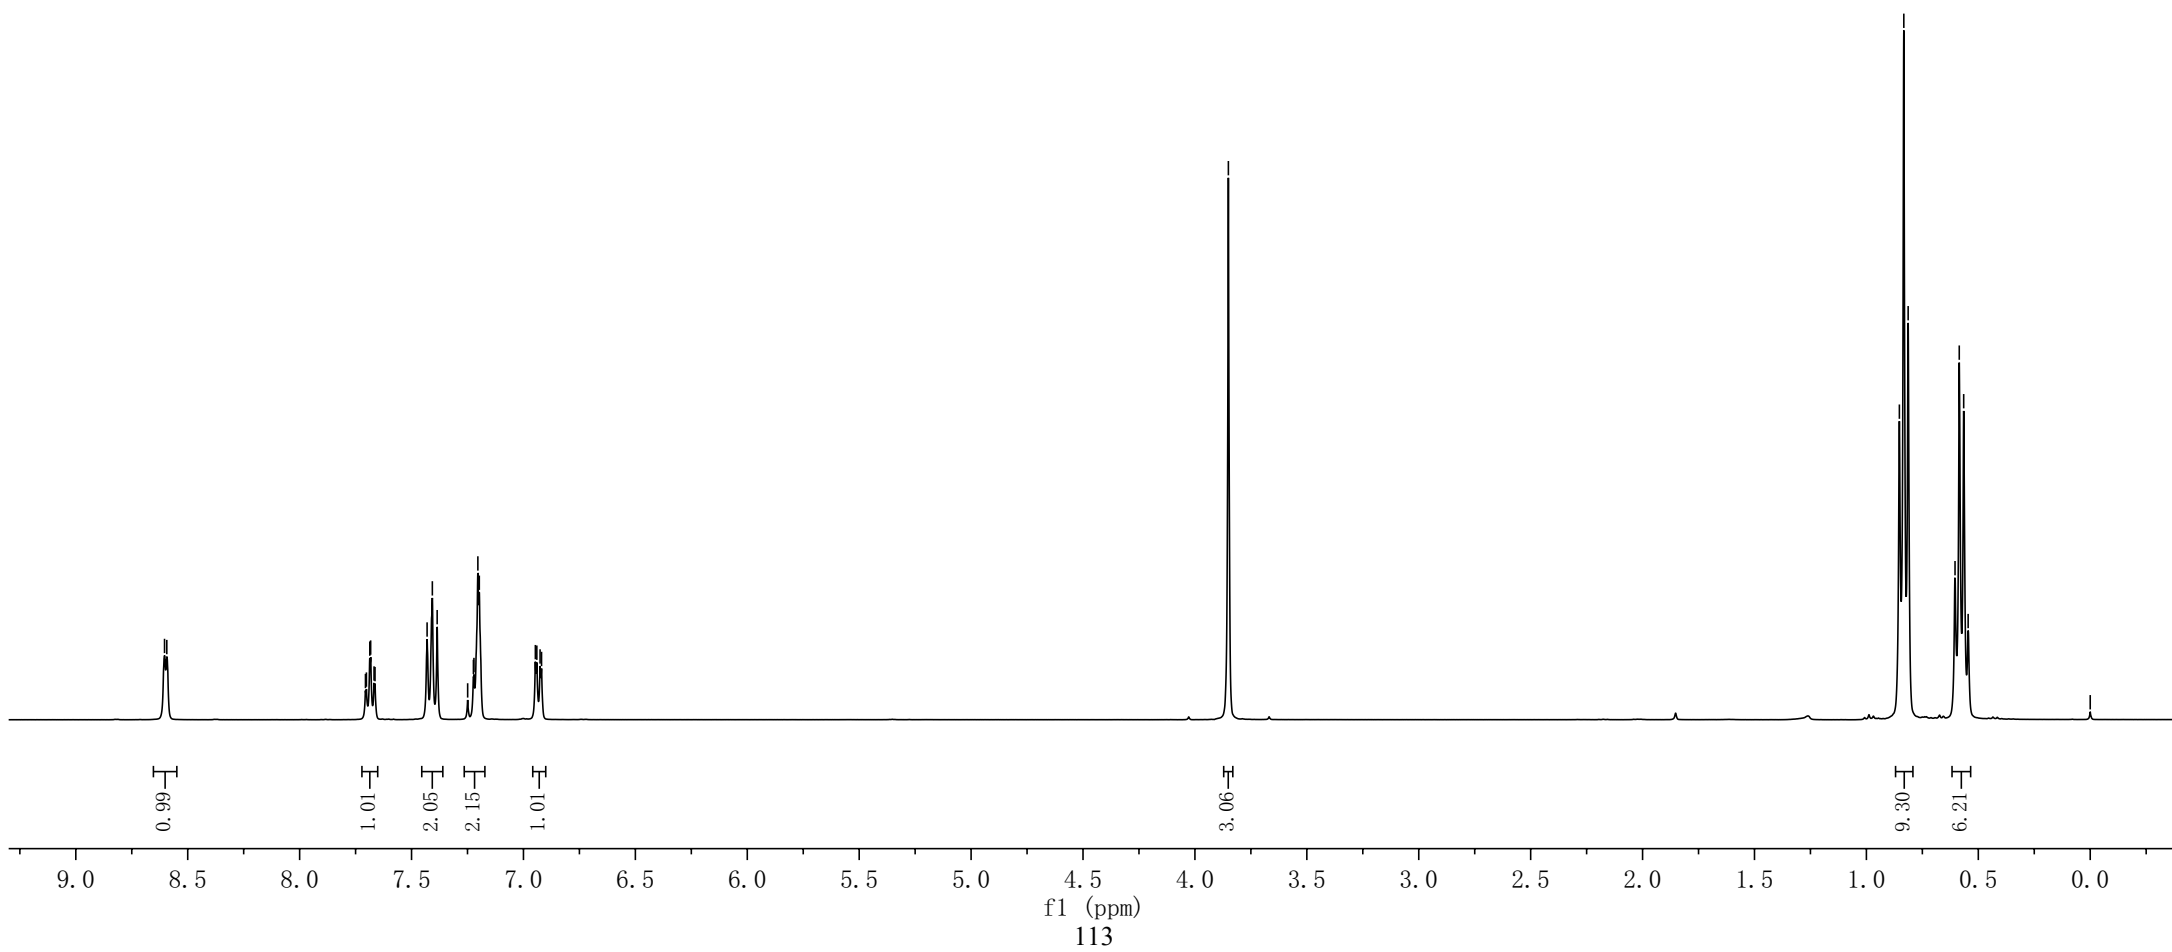

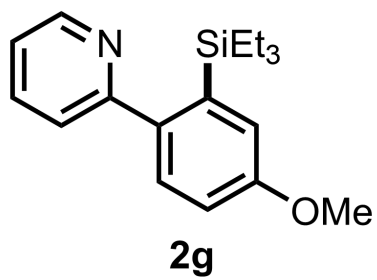

**<sup>13</sup>C NMR spectrum (100 MHz, CDCl<sub>3</sub>)**

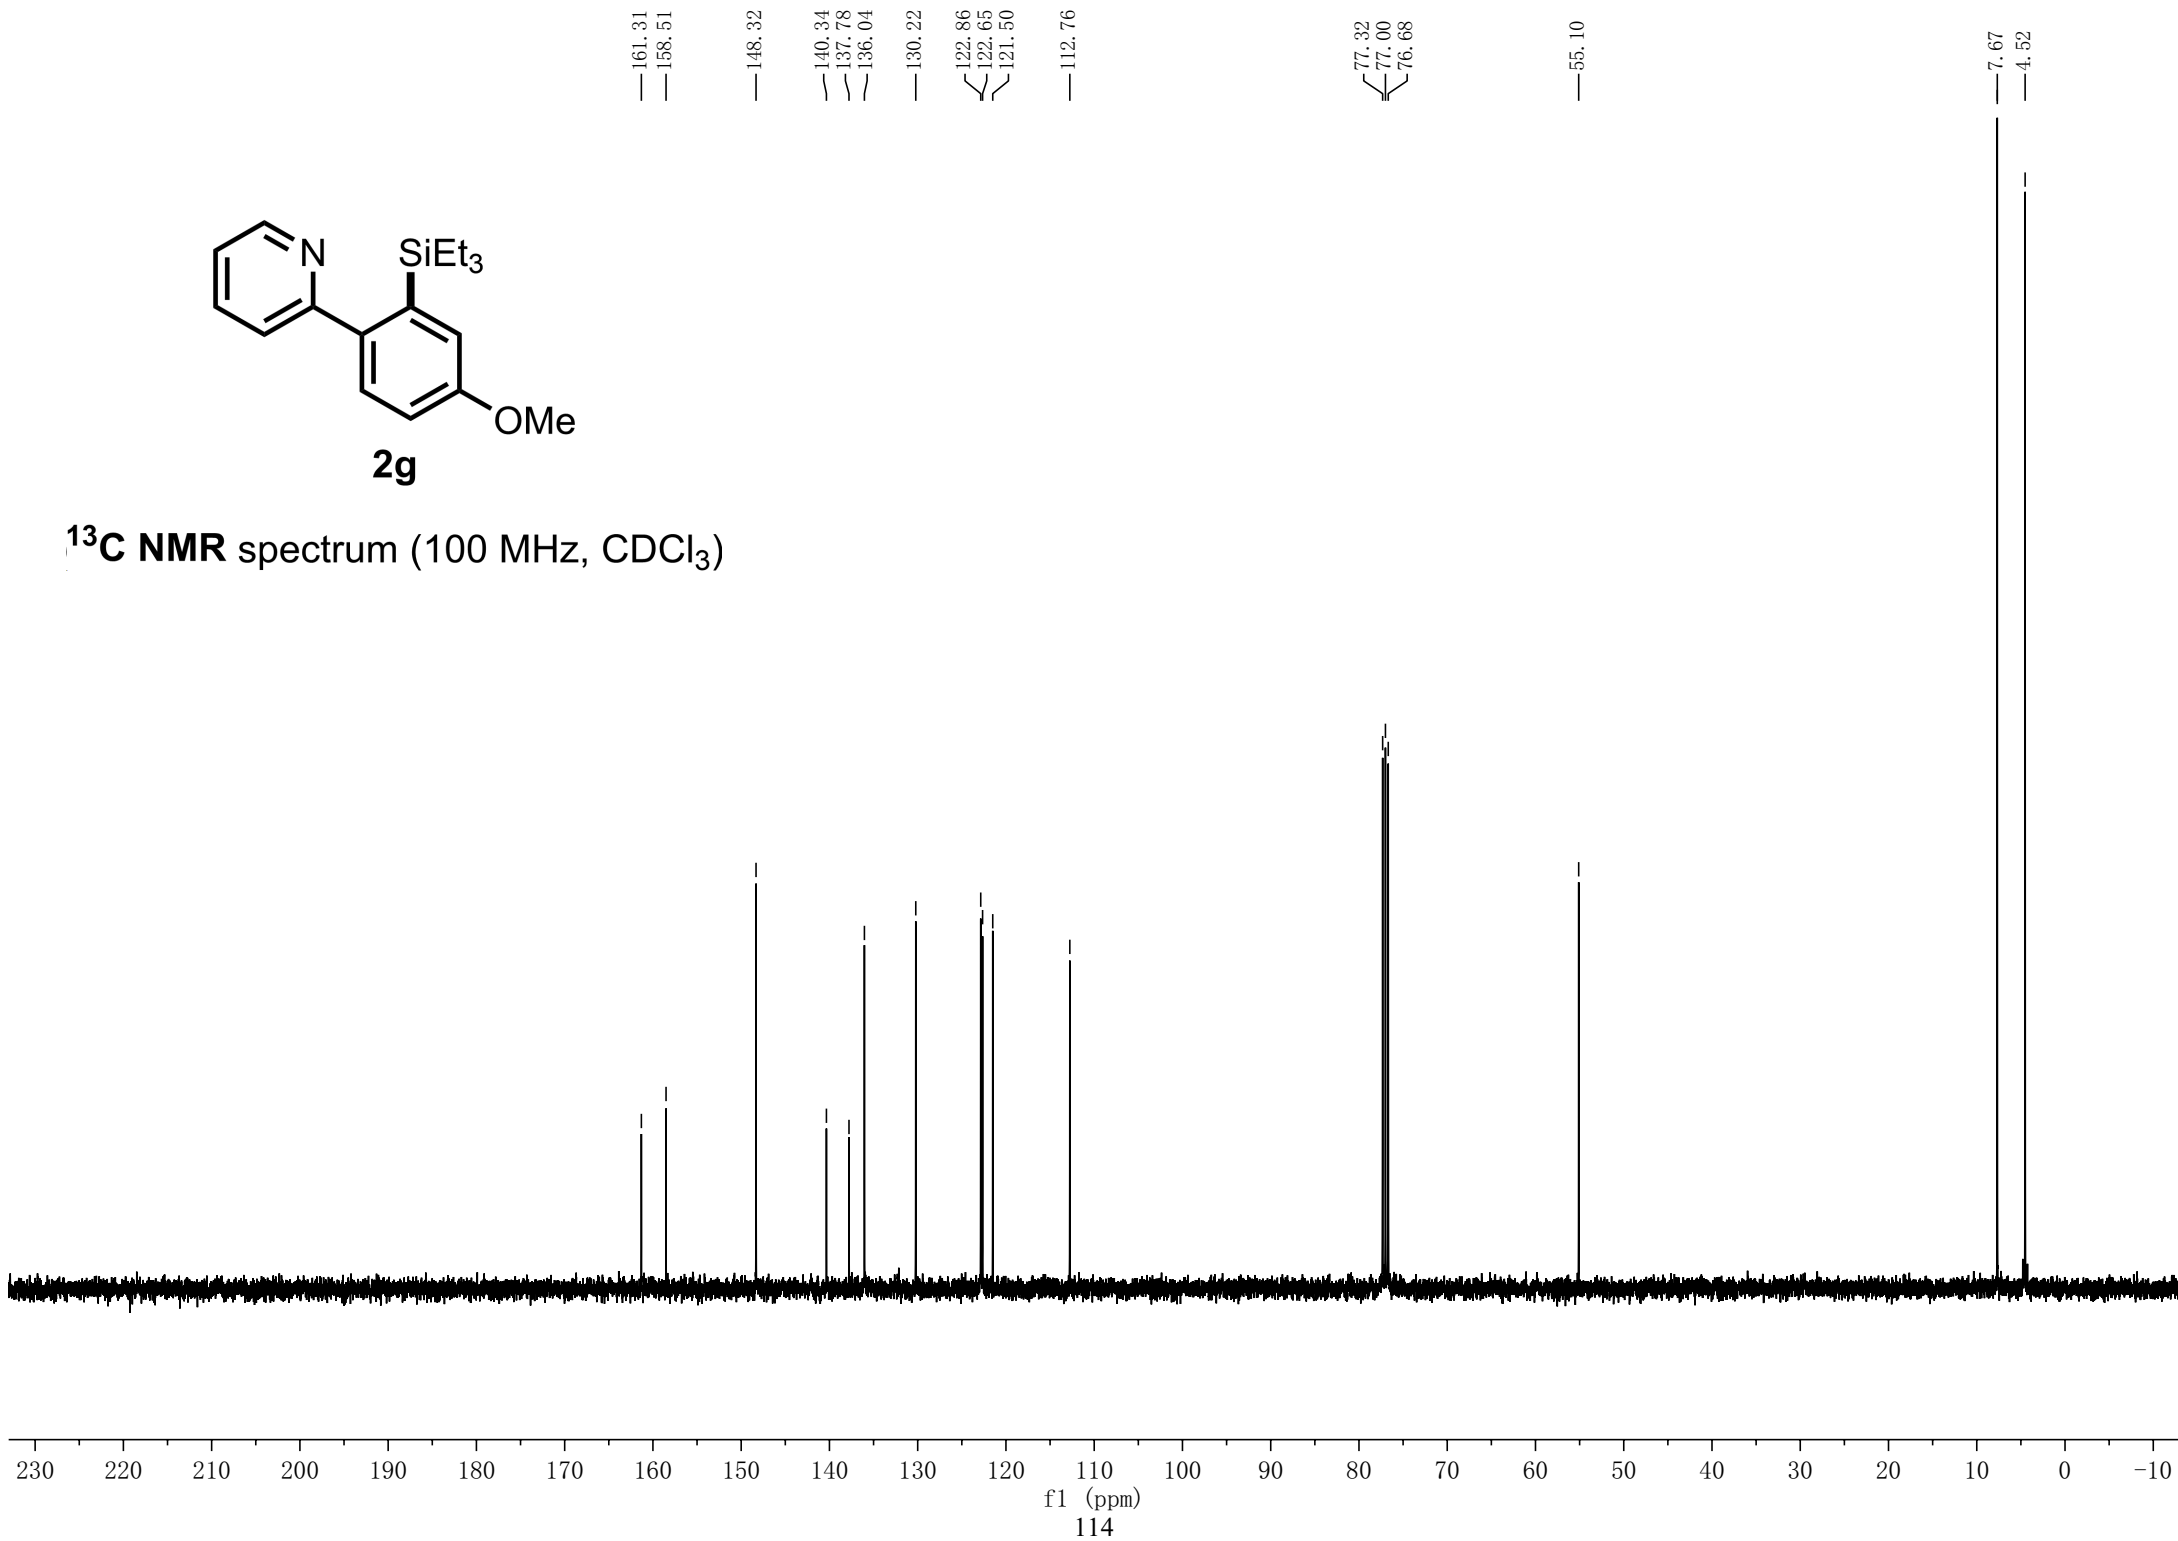

7.64  
7.62  
7.59  
7.57  
7.56  
7.38  
7.38  
7.37  
7.37  
7.36  
7.35  
7.35  
7.34  
7.34  
7.33  
7.22  
7.21  
7.10  
7.08

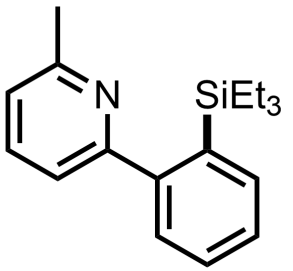

**2h**

<sup>1</sup>H NMR spectrum (600 MHz, CDCl<sub>3</sub>)

—2.58

0.84  
0.83  
0.82  
0.58  
0.57  
0.56  
0.55

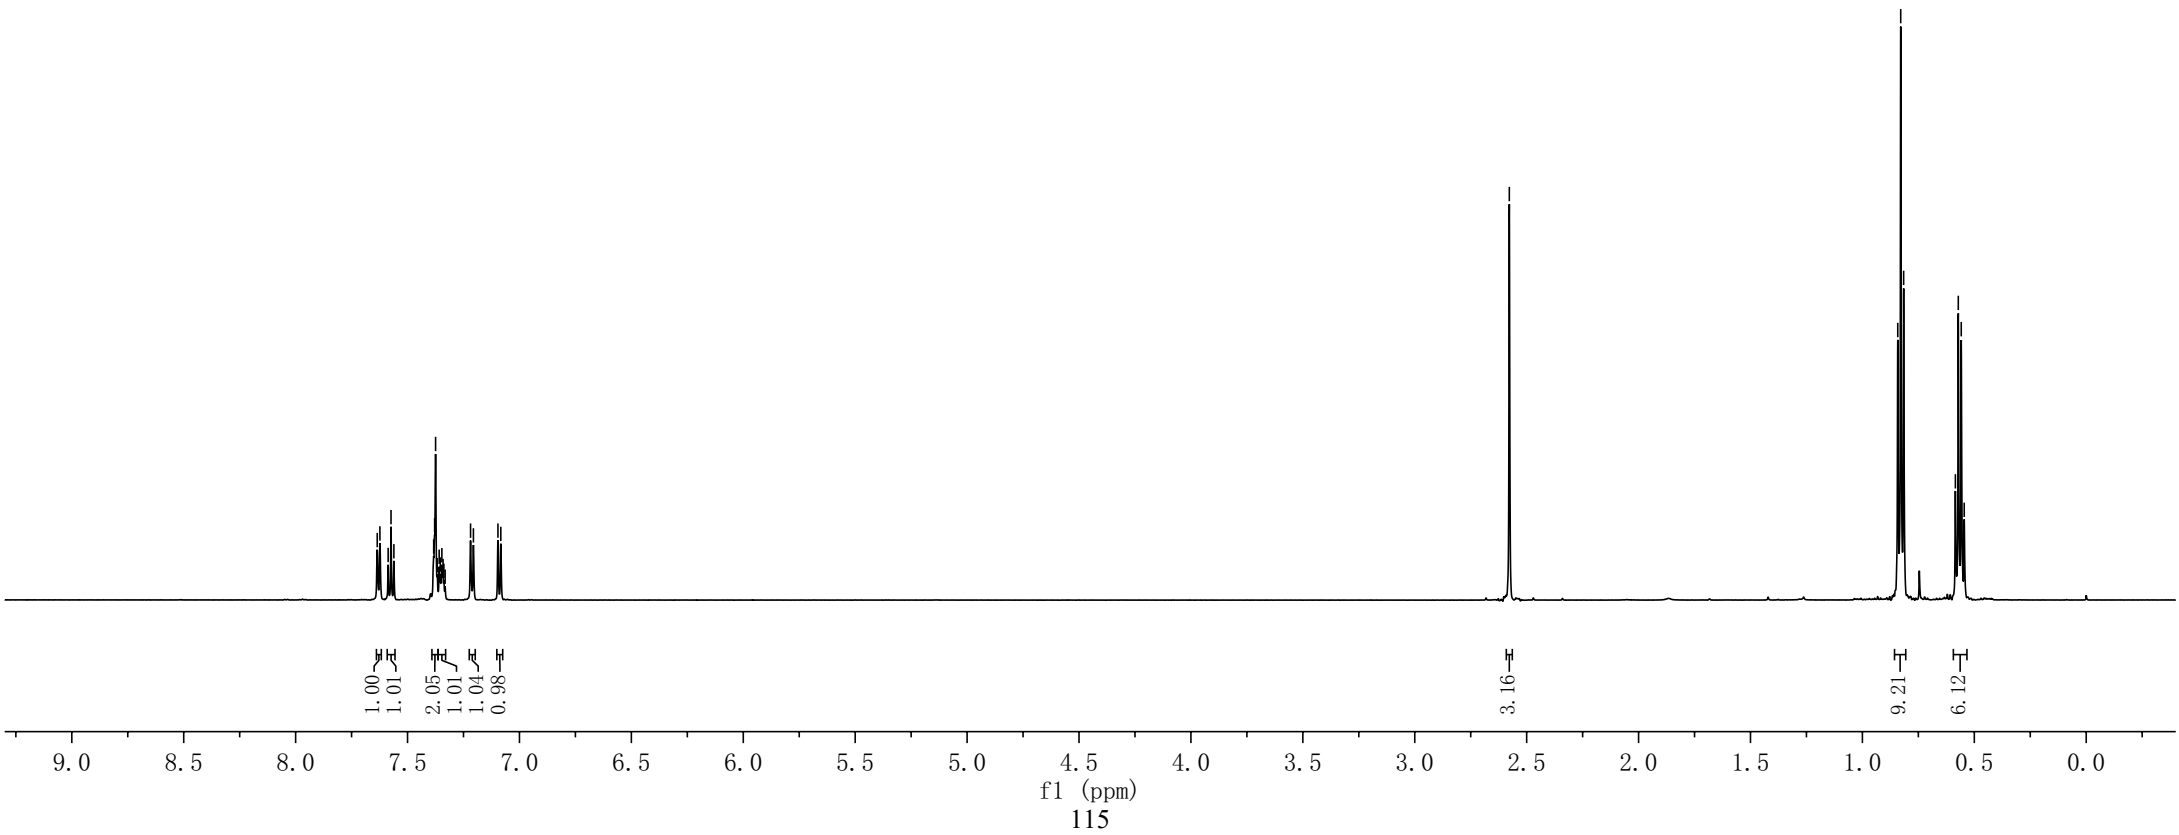

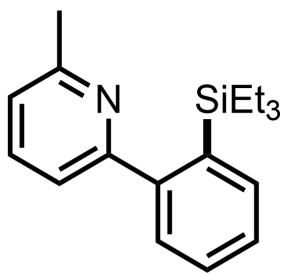

2h

<sup>13</sup>C NMR spectrum (100 MHz, CDCl<sub>3</sub>)

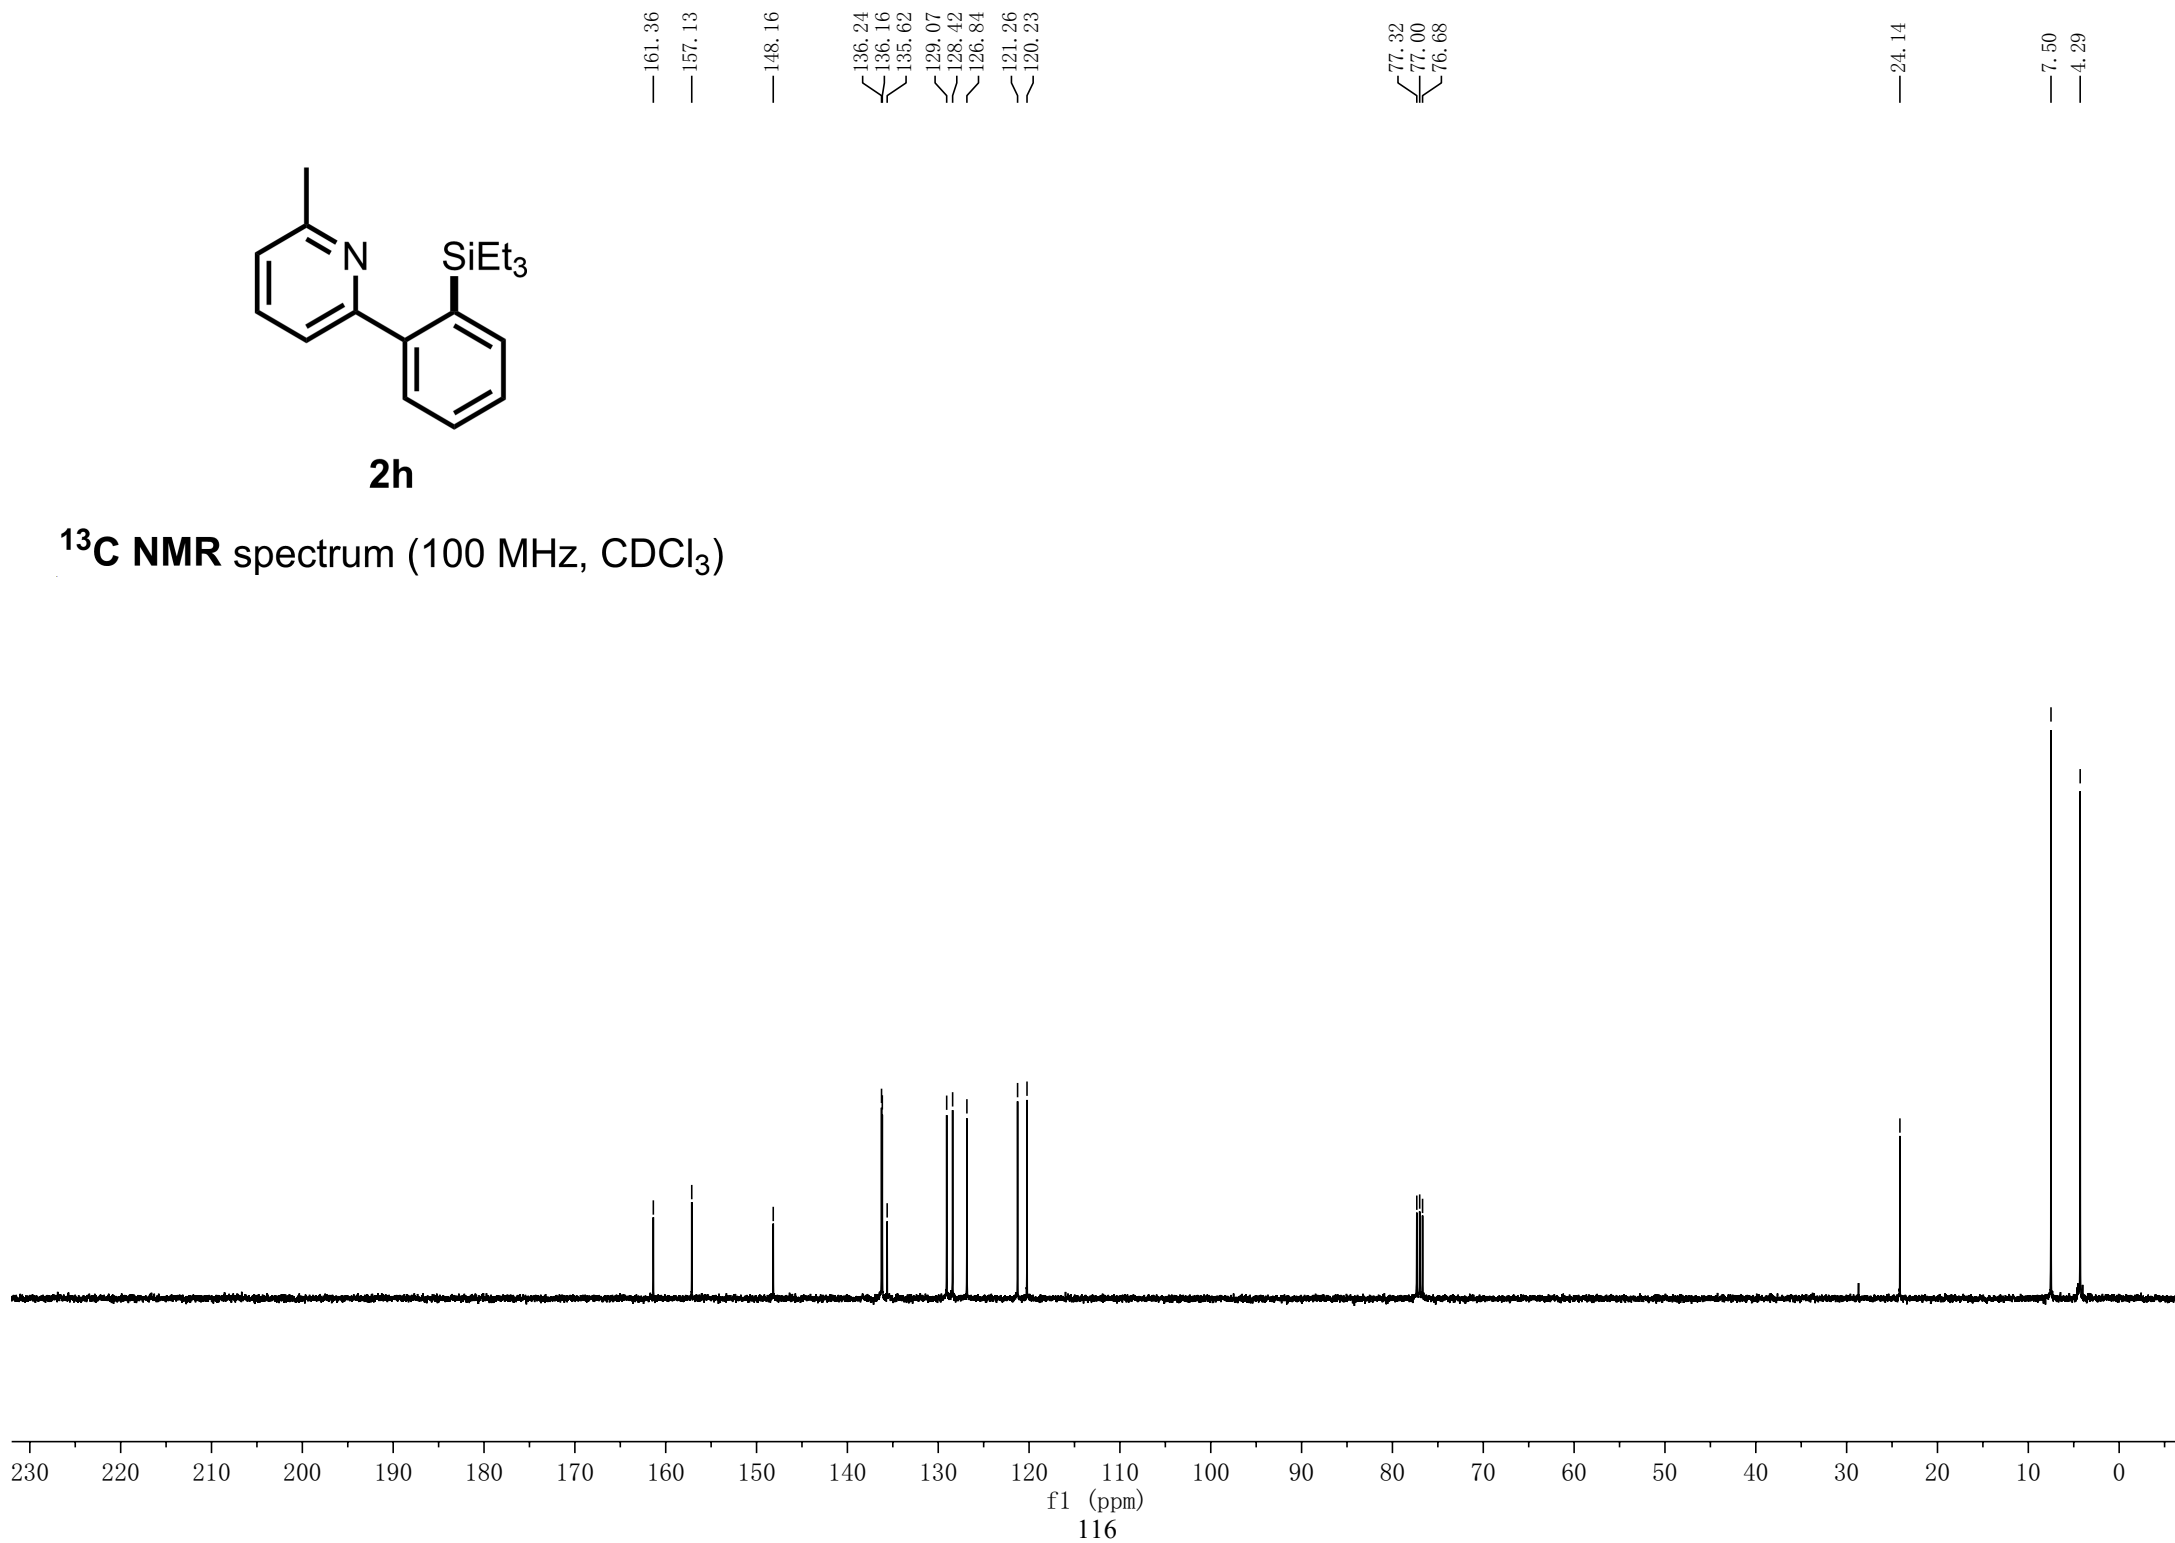

8.45  
7.64  
7.62  
7.51  
7.50  
7.40  
7.39  
7.37  
7.36  
7.35  
7.35  
7.34  
7.32

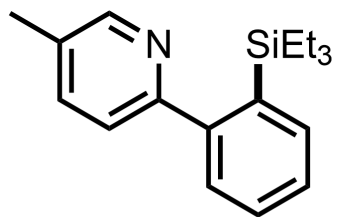

2i

<sup>1</sup>H NMR spectrum (400 MHz, CDCl<sub>3</sub>)

2.37  
0.85  
0.83  
0.81  
0.59  
0.57  
0.55  
0.53  
-0.00

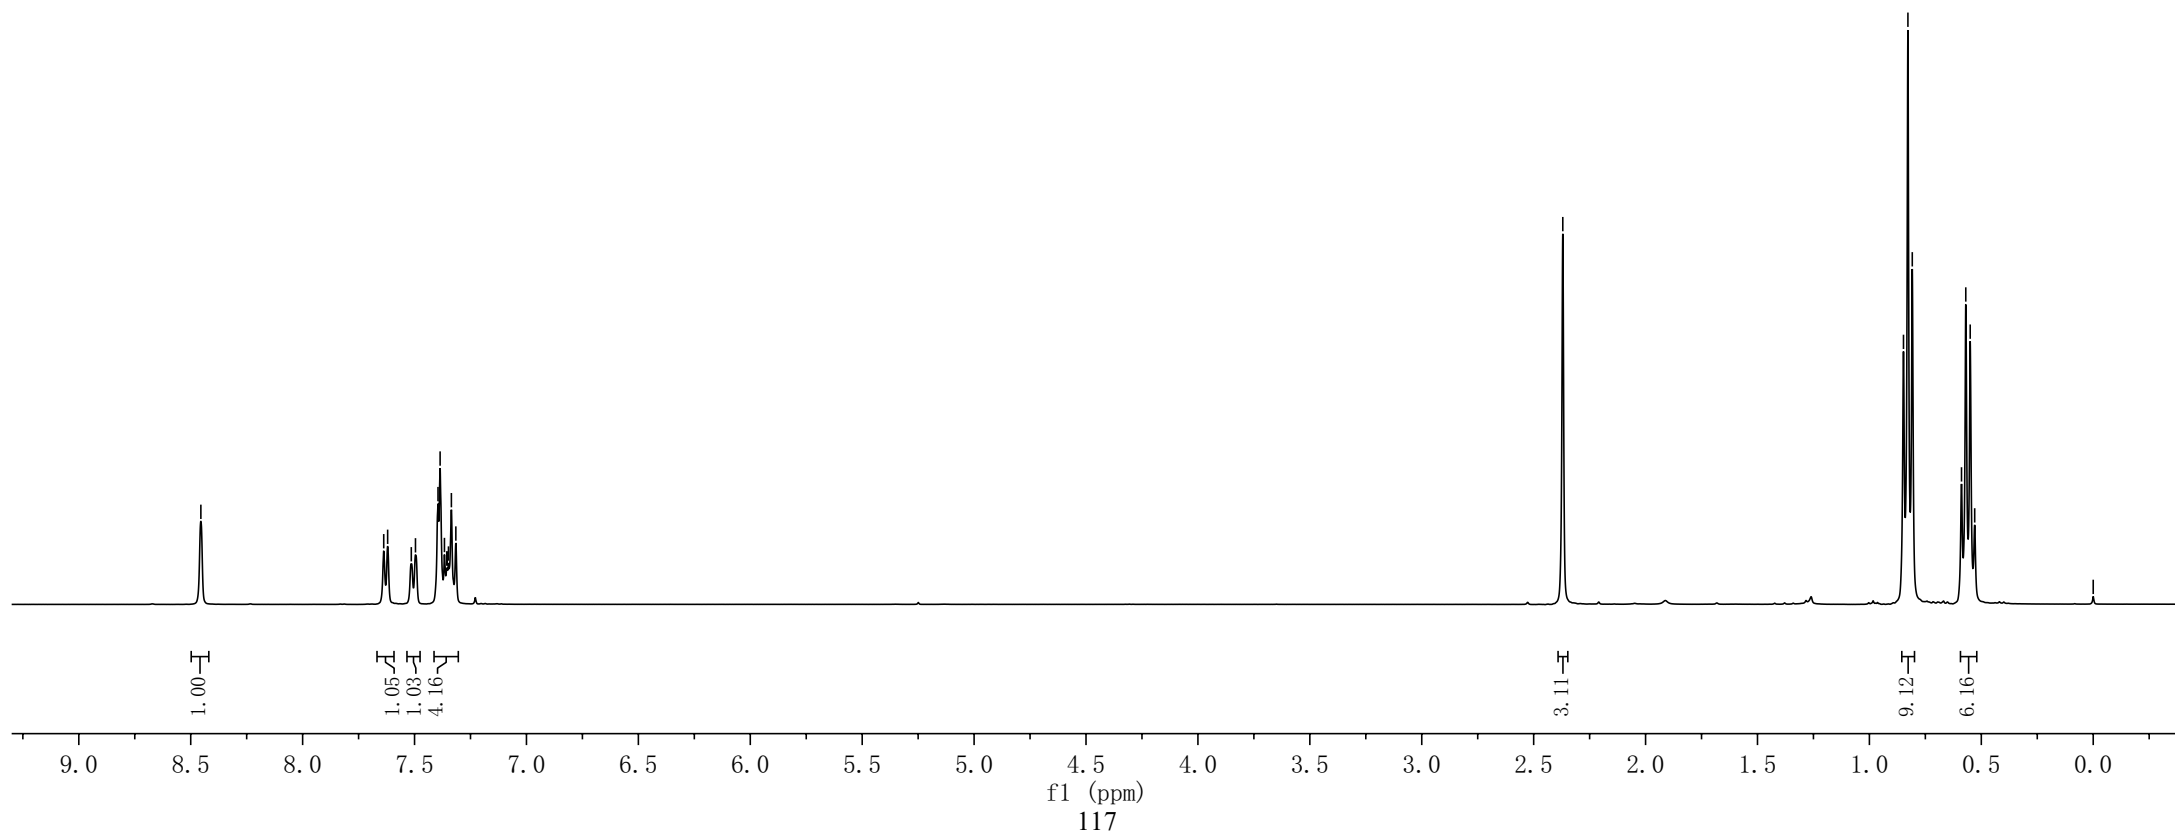

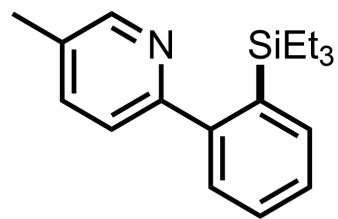

**2i**

**<sup>13</sup>C NMR spectrum (100 MHz, CDCl<sub>3</sub>)**

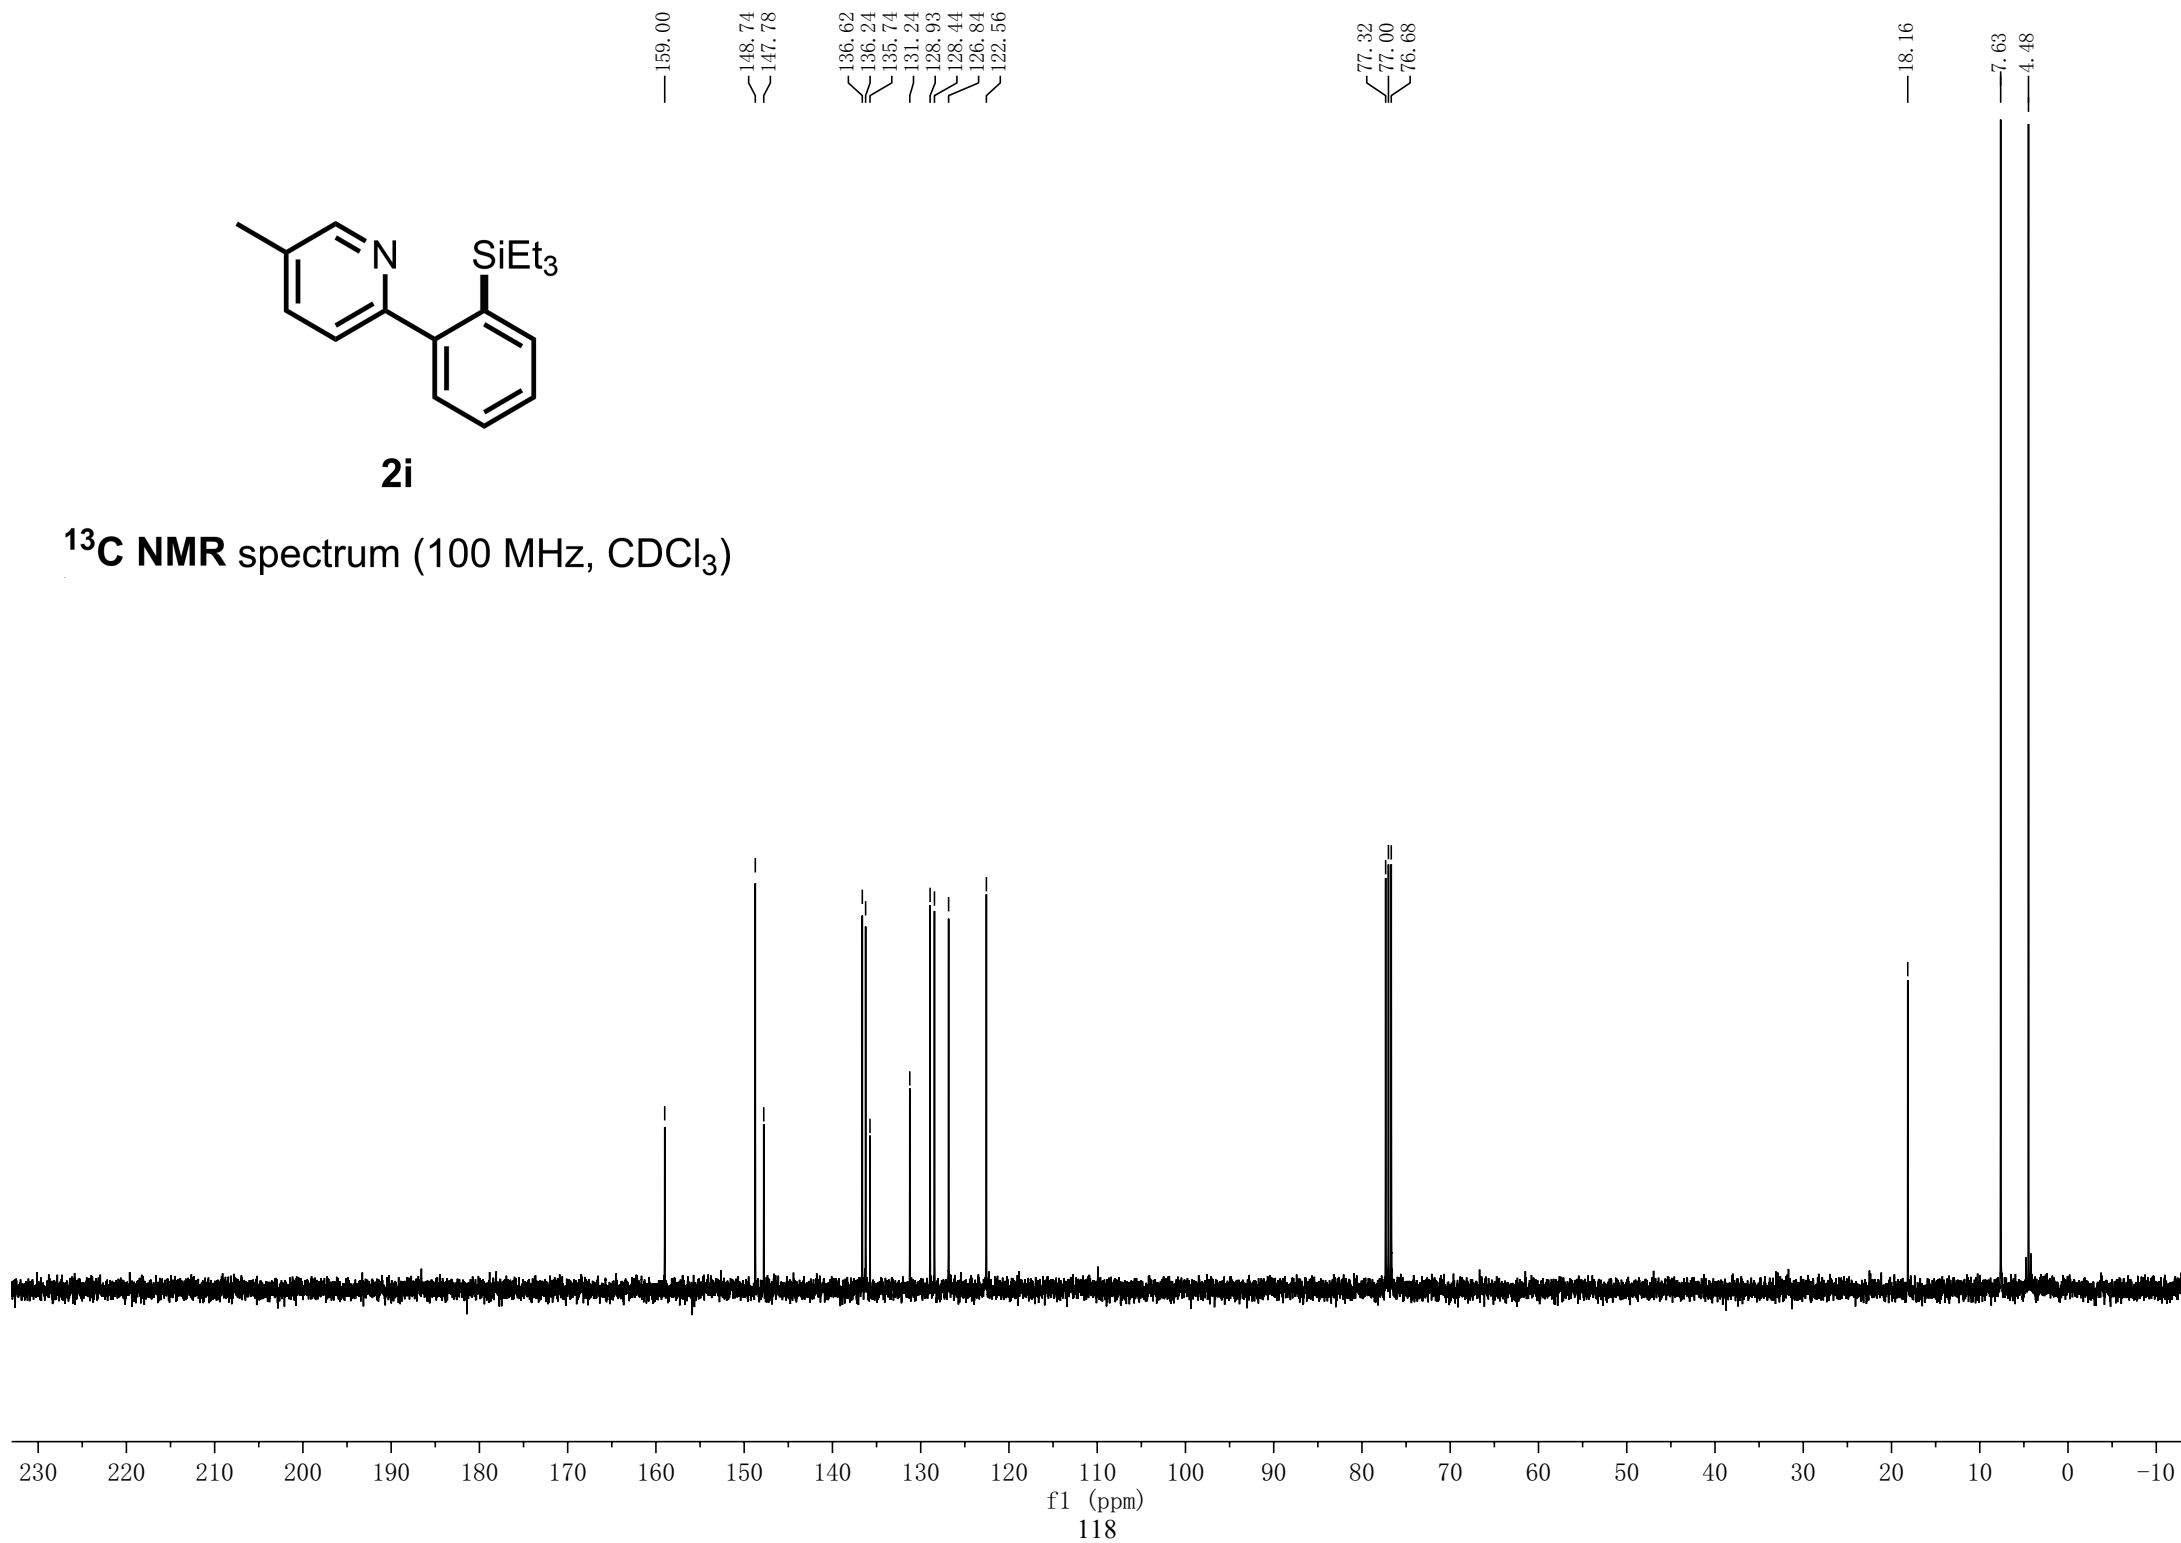

8.48  
8.47

7.64  
7.62  
7.41  
7.40  
7.39  
7.38  
7.37  
7.36  
7.35  
7.34  
7.34  
7.25  
7.24  
7.07  
7.06

2.38

0.85  
0.83  
0.81  
0.58  
0.56  
0.54  
0.52

0.00

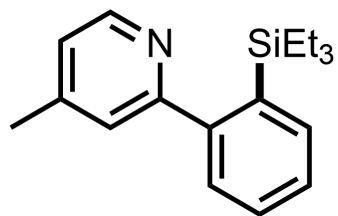

2j

<sup>1</sup>H NMR spectrum (400 MHz, CDCl<sub>3</sub>)

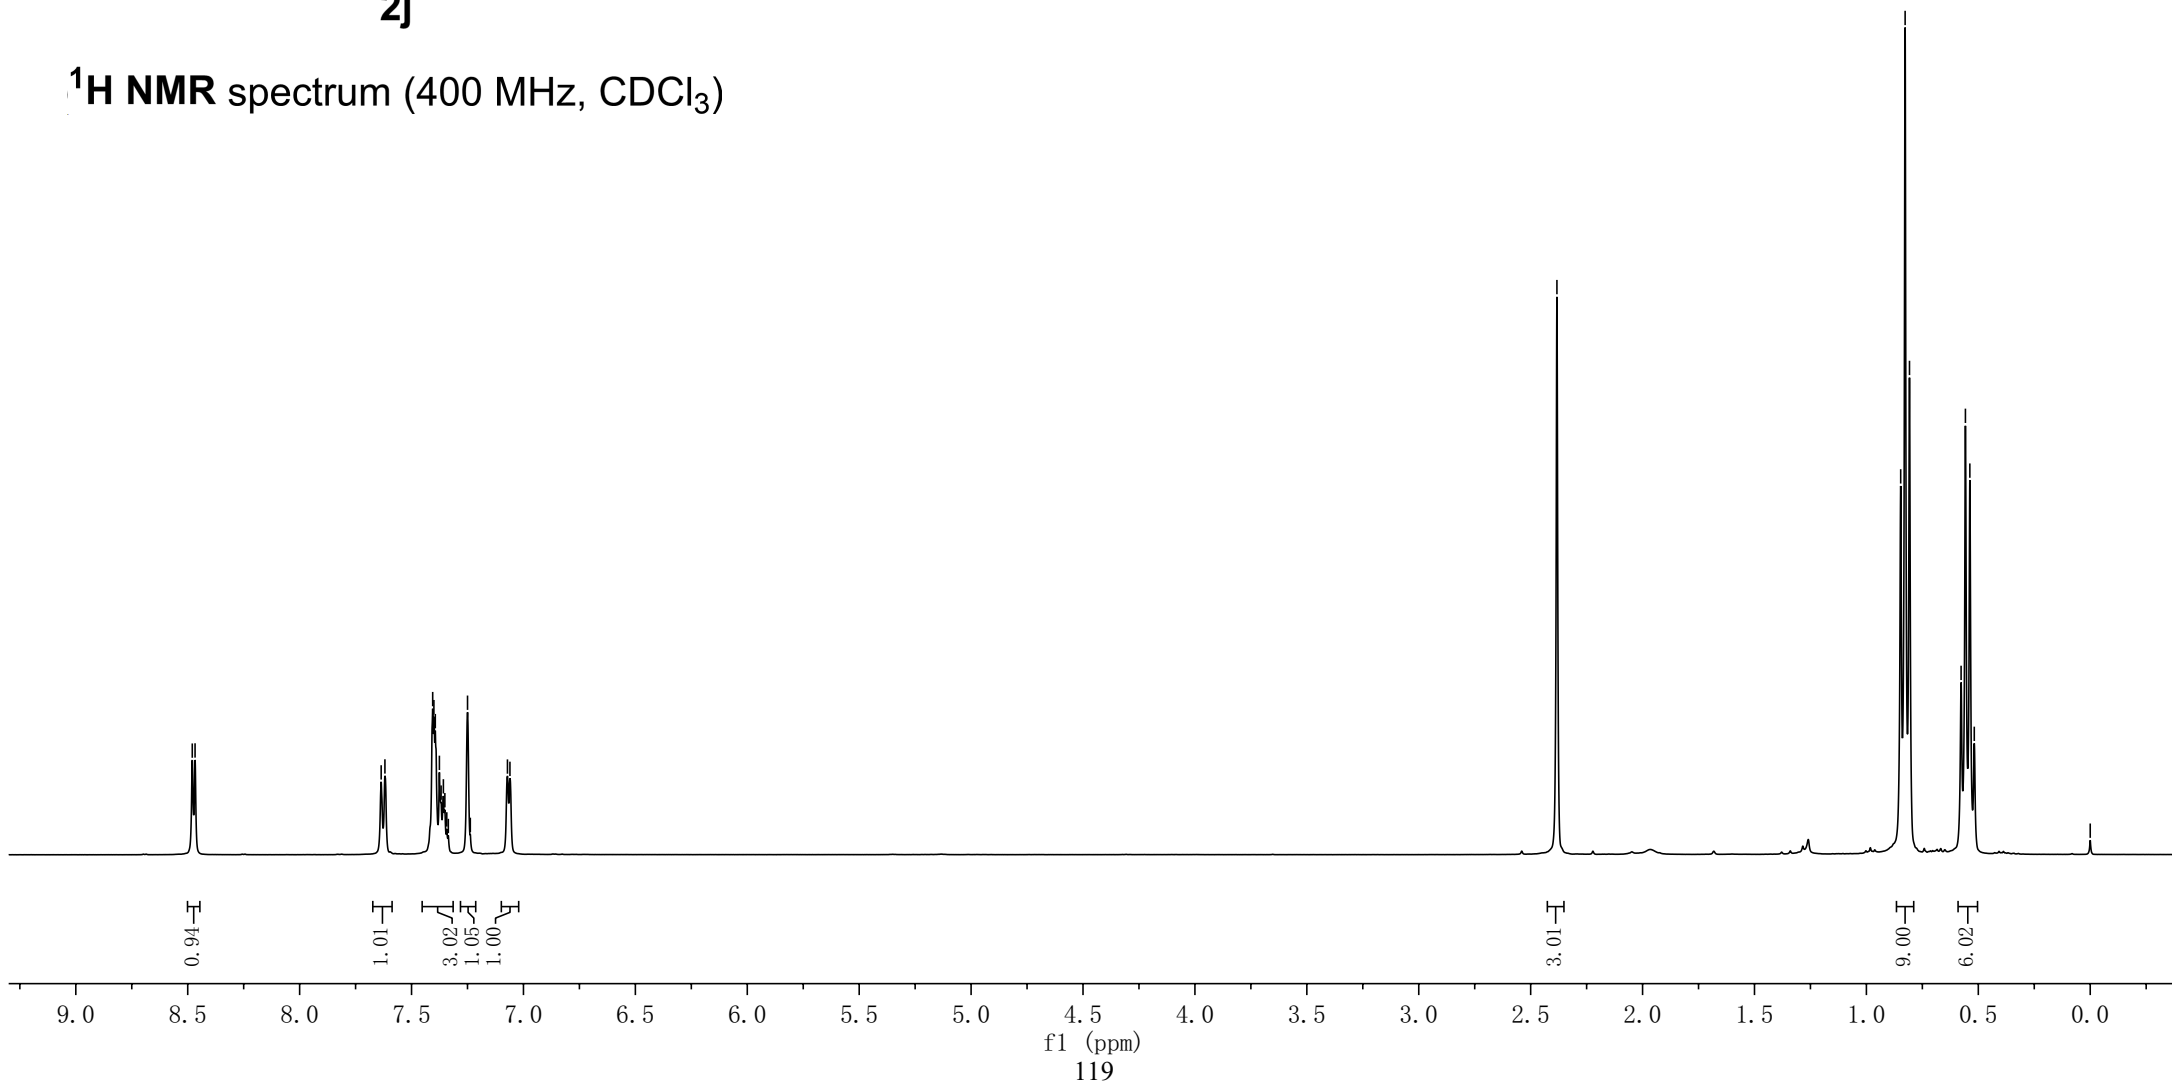

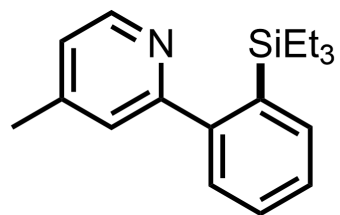

2j

<sup>13</sup>C NMR spectrum (100 MHz, CDCl<sub>3</sub>)

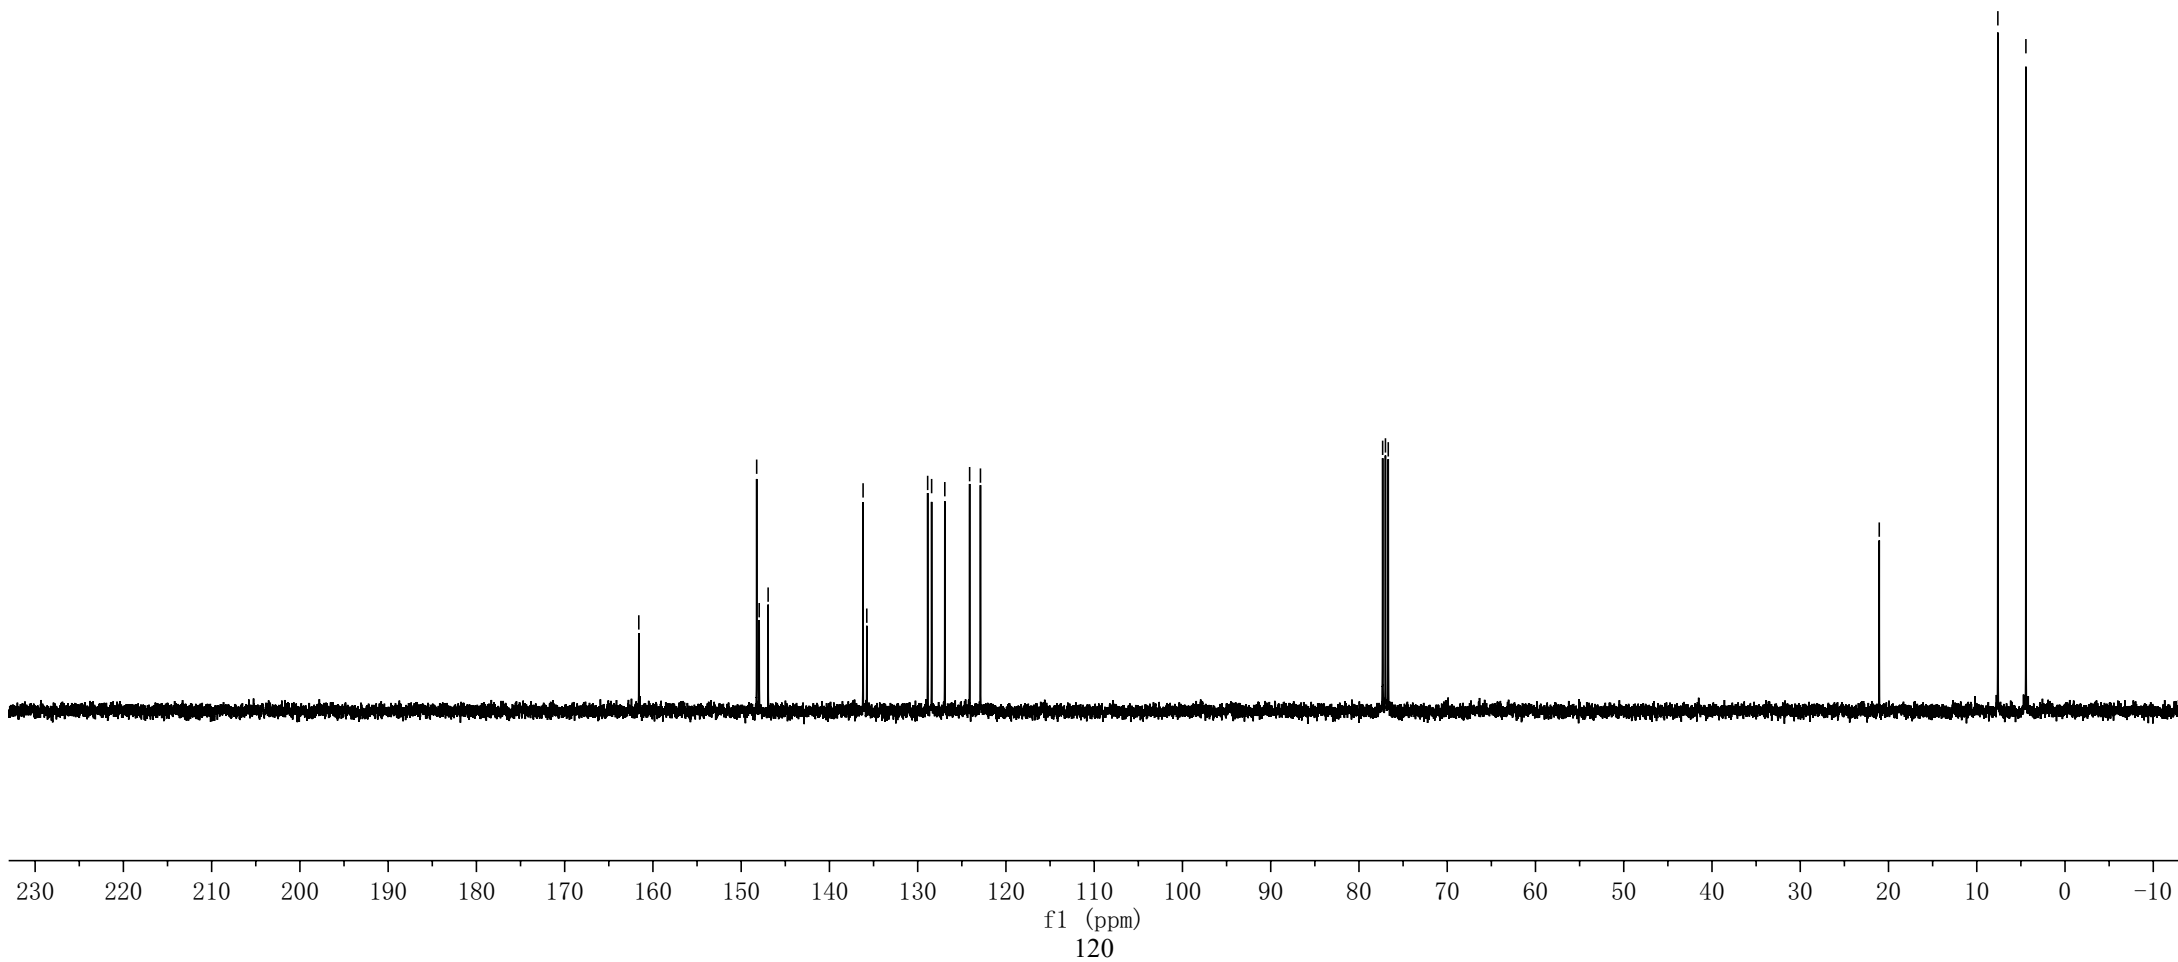



8.94  
8.93  
8.93  
8.92  
8.16  
8.16  
8.14  
8.14  
8.14  
8.07  
8.07  
8.06  
8.06  
8.05  
7.93  
7.92  
7.91  
7.90  
7.83  
7.81  
7.69  
7.67  
7.66  
7.65  
7.50  
7.49  
7.48  
7.47

1.08  
1.07  
1.05  
1.03  
1.02  
1.02  
0.93  
0.92  
0.91  
0.89

-0.00

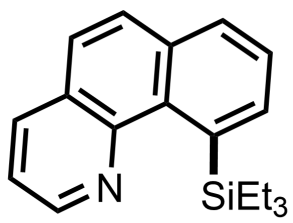

**2k**

**<sup>1</sup>H NMR spectrum (400 MHz, CDCl<sub>3</sub>)**

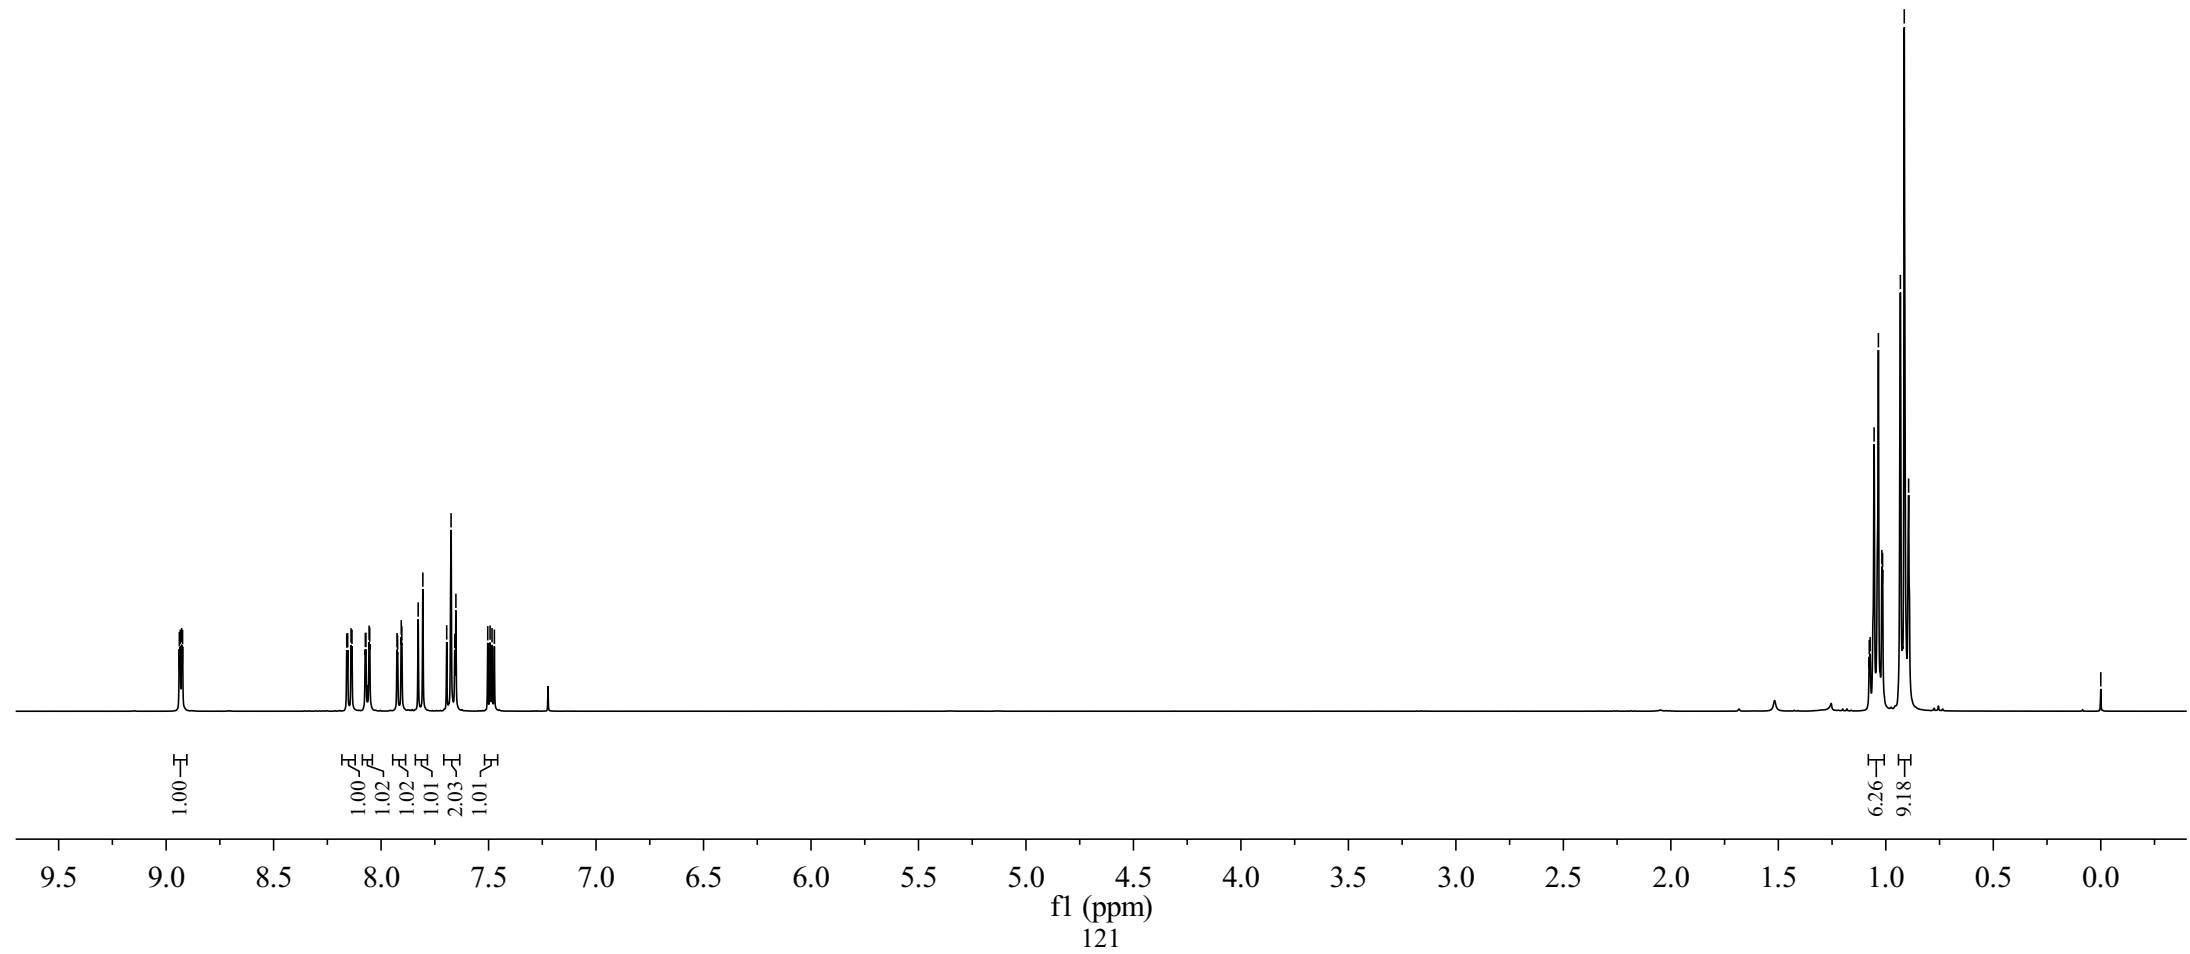

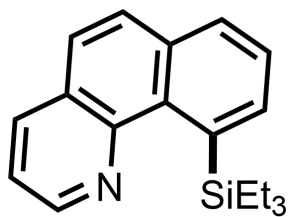

**2k**

**<sup>13</sup>C NMR spectrum (100 MHz, CDCl<sub>3</sub>)**

147.07  
145.72  
136.98  
136.85  
135.50  
135.33  
133.78  
129.24  
128.95  
127.22  
126.51  
124.59  
121.41

77.32  
77.00  
76.68

8.57  
7.03

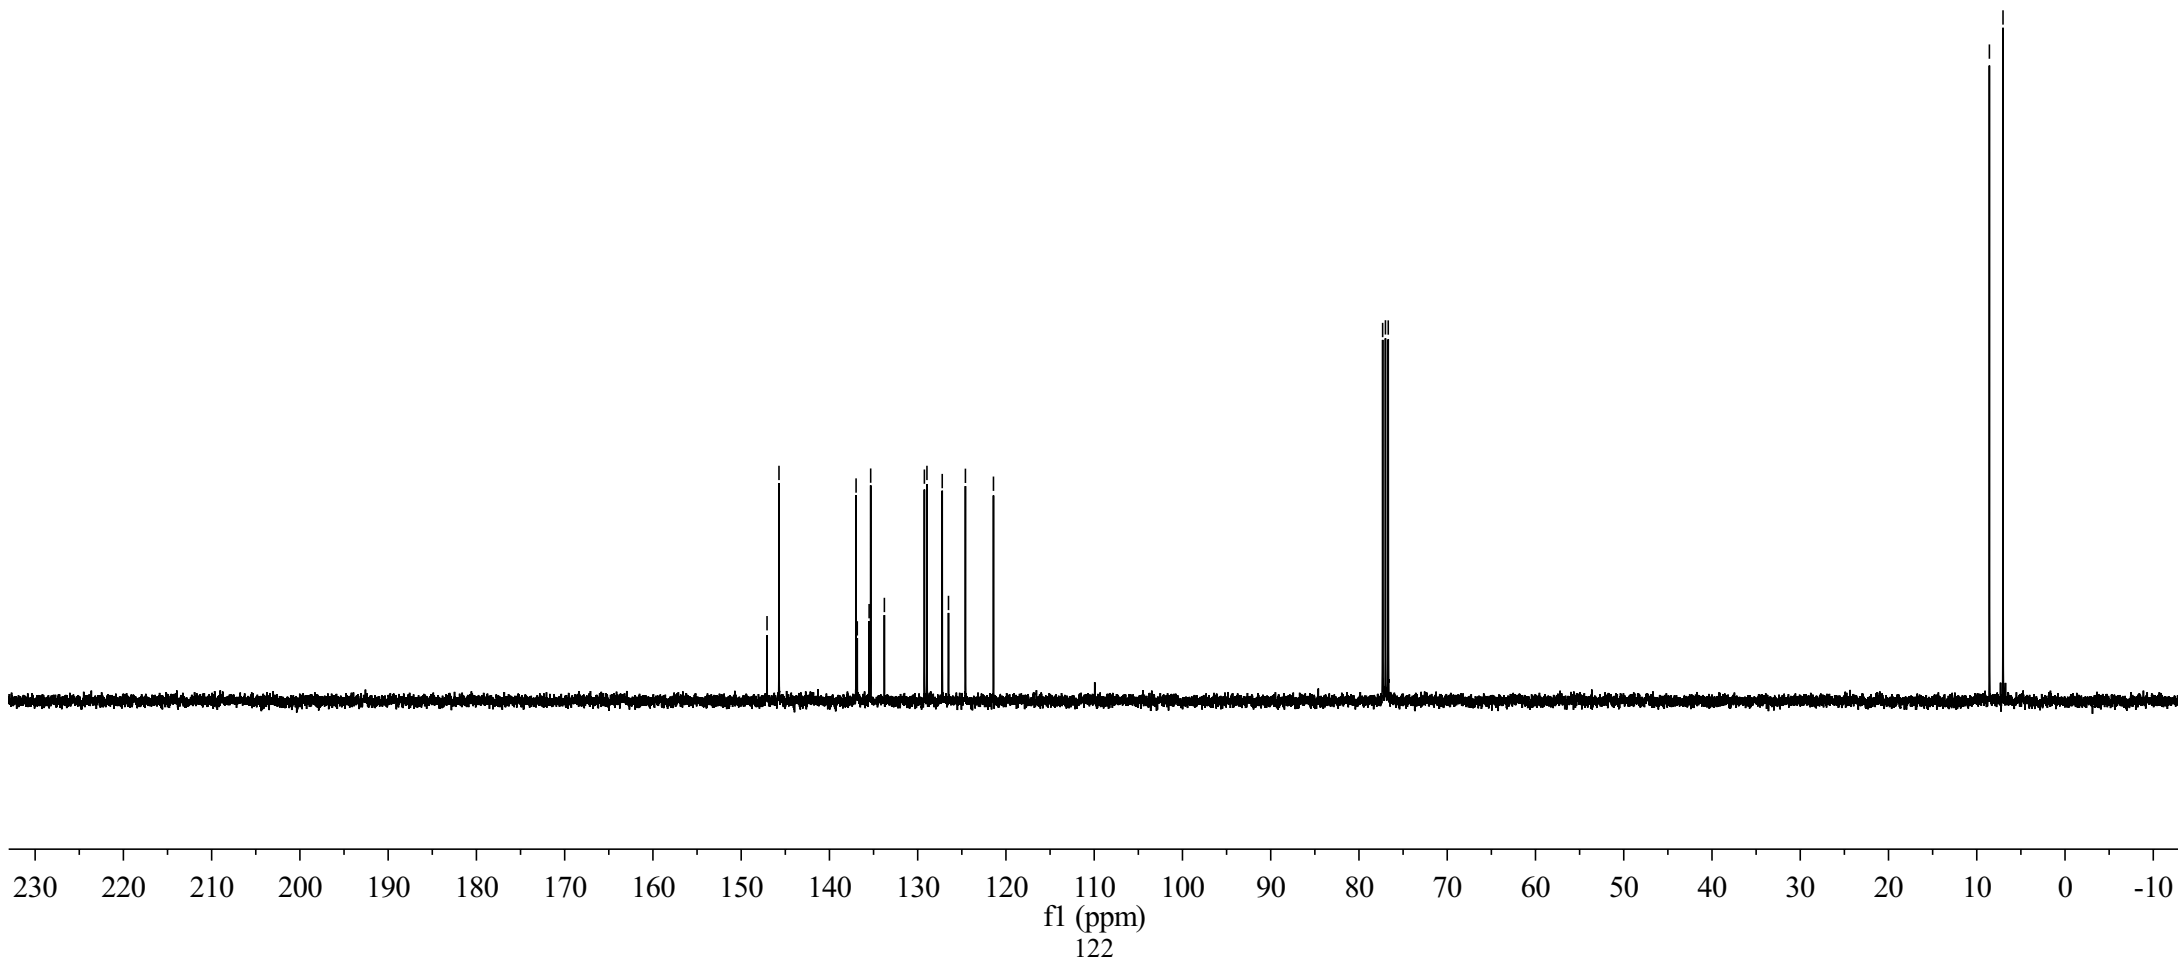

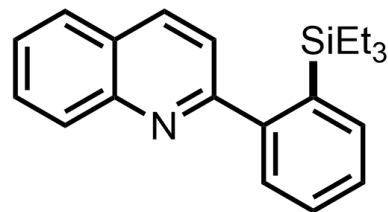

**2I**

<sup>1</sup>H NMR spectrum (600 MHz, CDCl<sub>3</sub>)

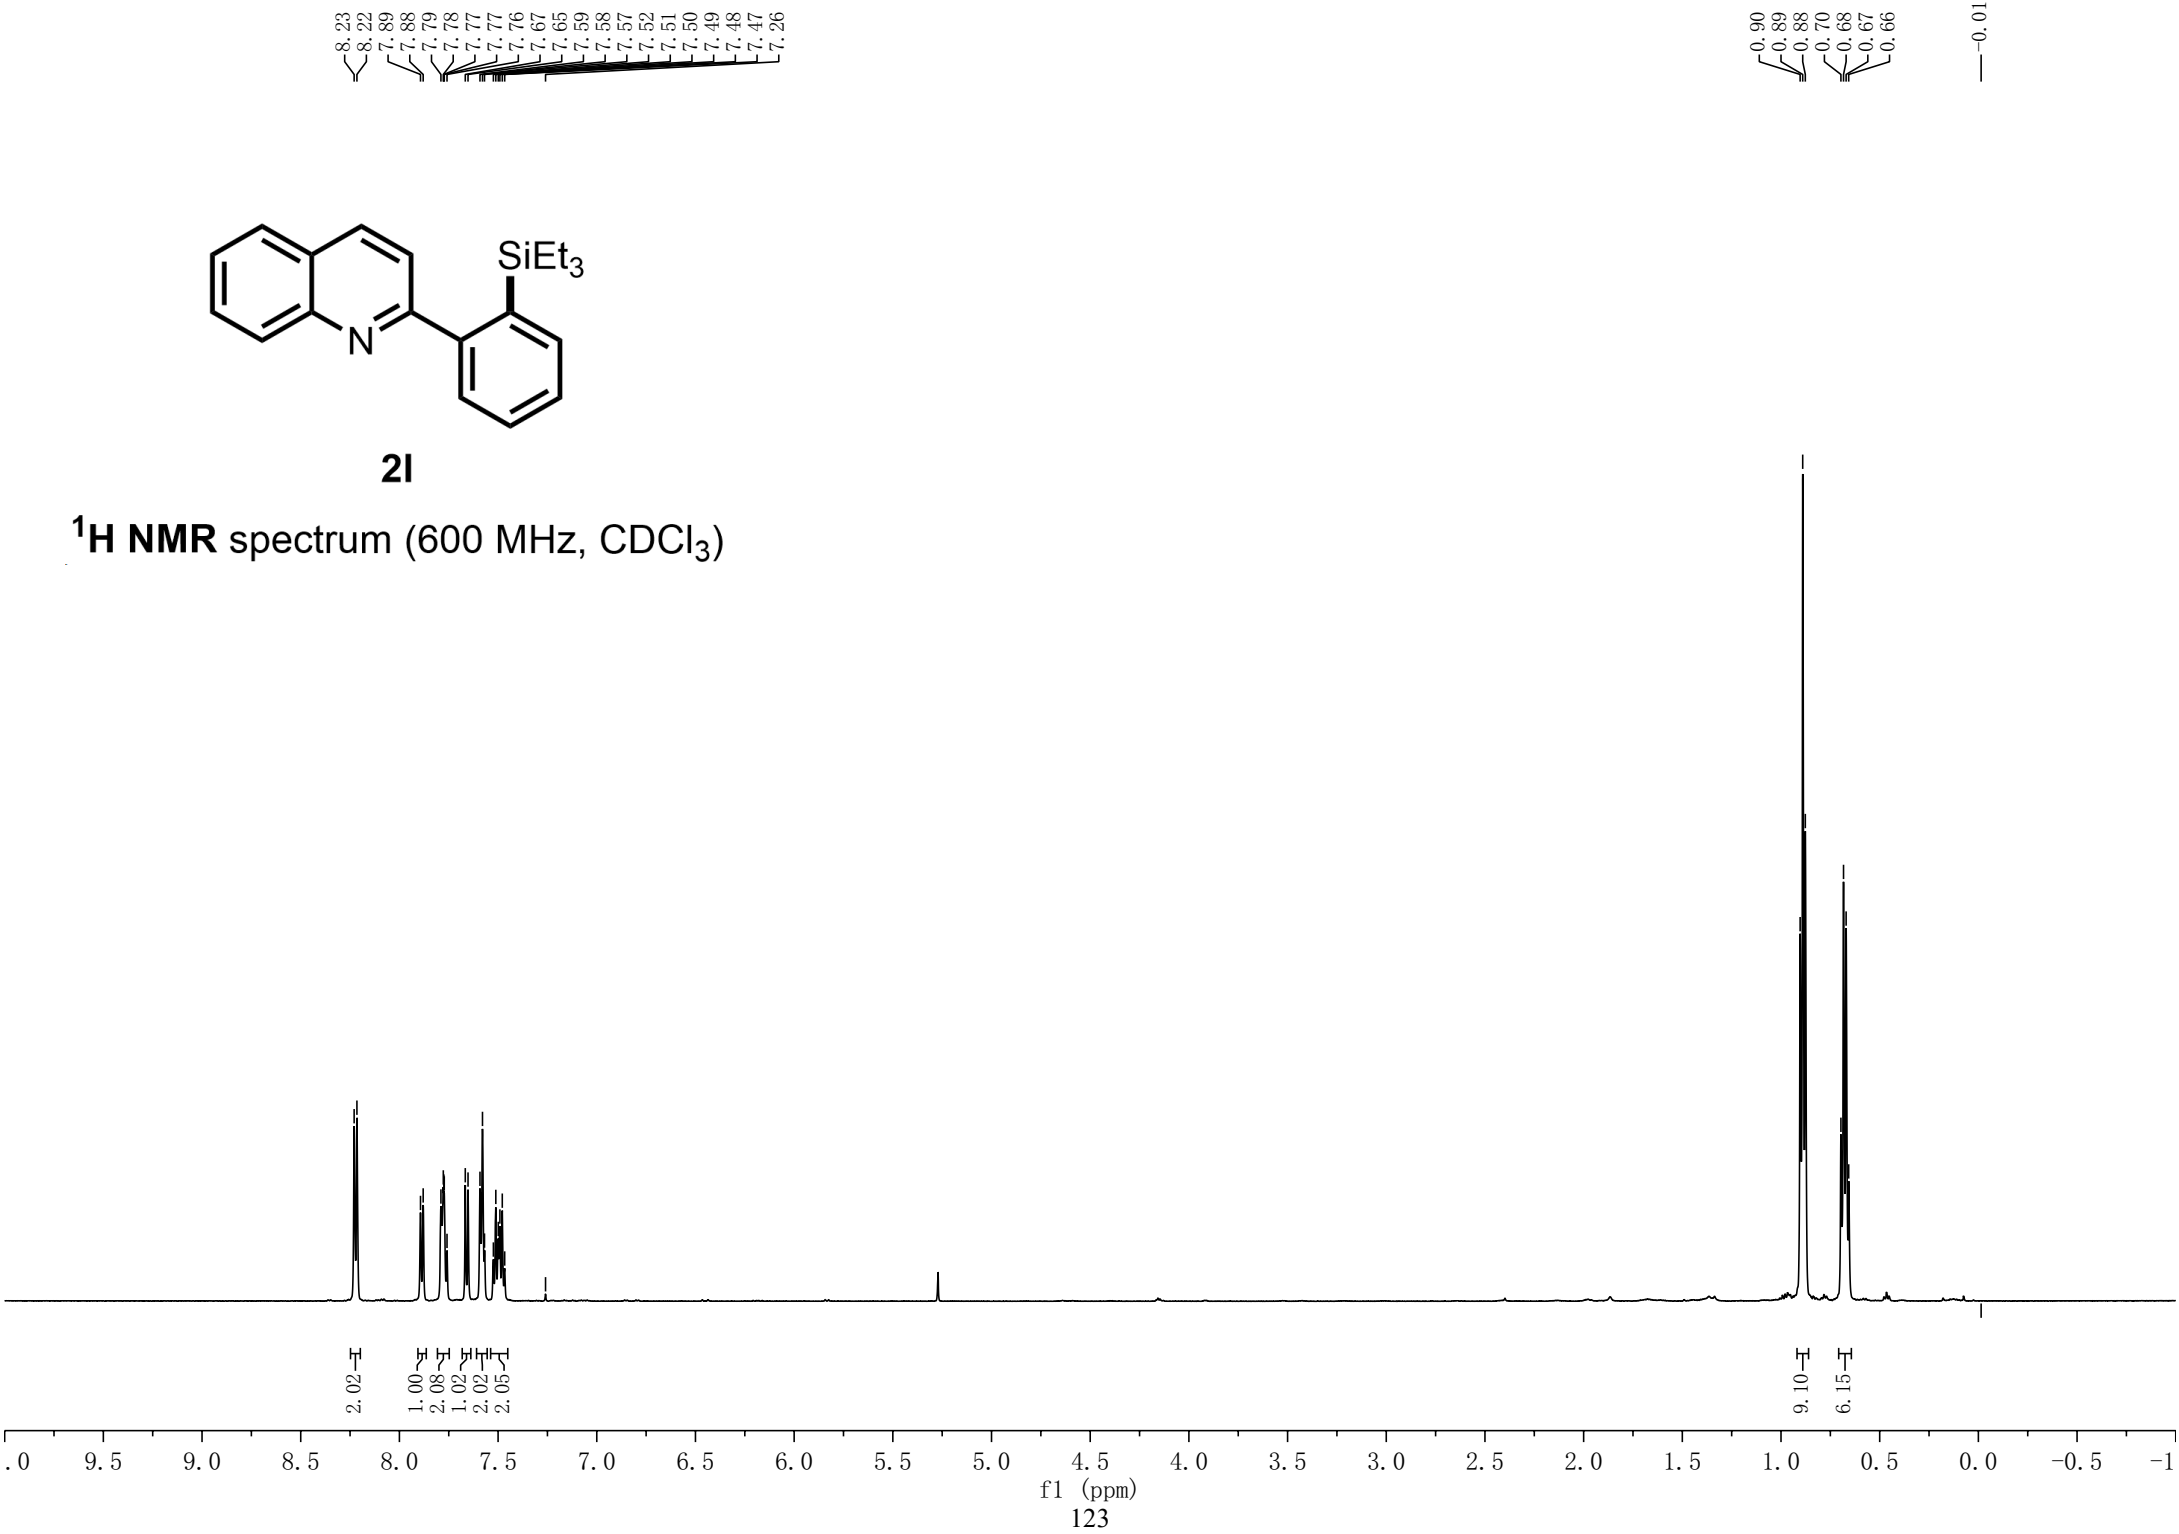

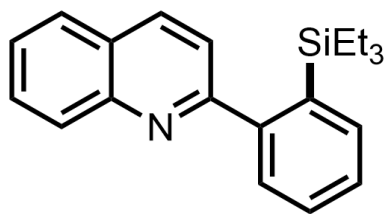

**2I**

<sup>13</sup>C NMR spectrum (150 MHz, CDCl<sub>3</sub>)

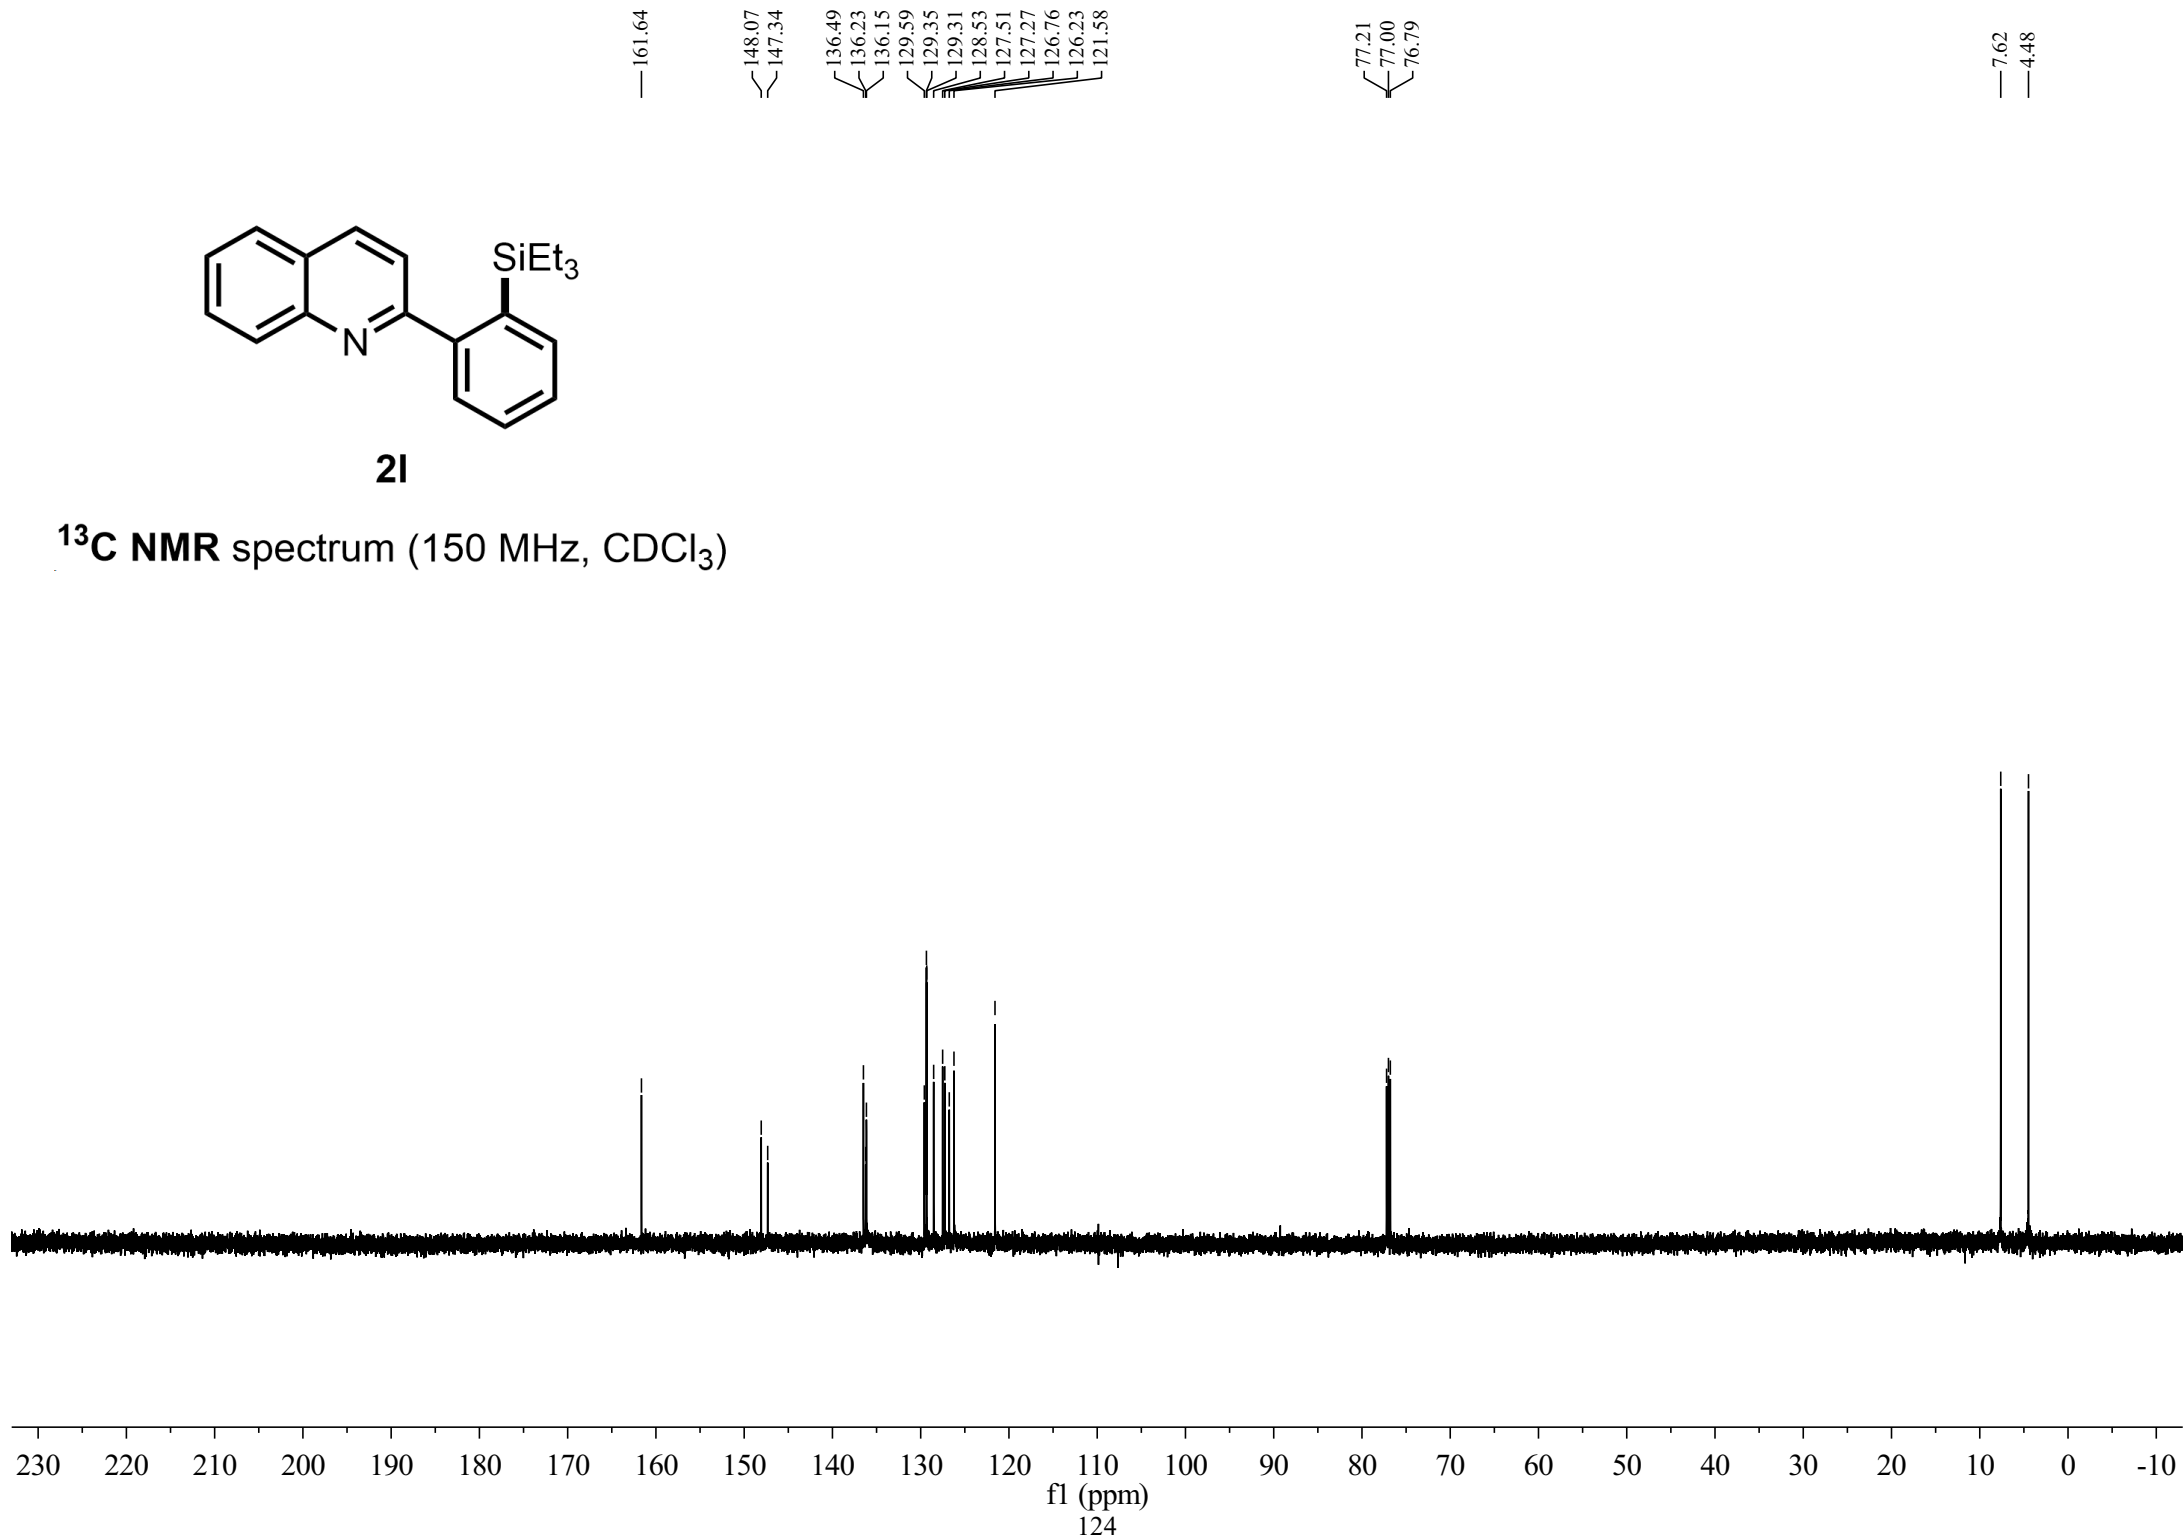

8.65  
8.64  
8.15  
8.14  
7.88  
7.55  
7.48  
7.47  
7.47  
7.46  
7.46  
7.23  
7.21  
7.21  
7.20

0.89  
0.88  
0.87  
0.86  
0.85  
0.68  
0.67  
0.66  
0.65  
0.64  
0.63  
-0.00

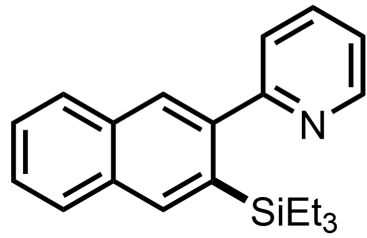

**2m**

**<sup>1</sup>H NMR spectrum (400 MHz, CDCl<sub>3</sub>)**

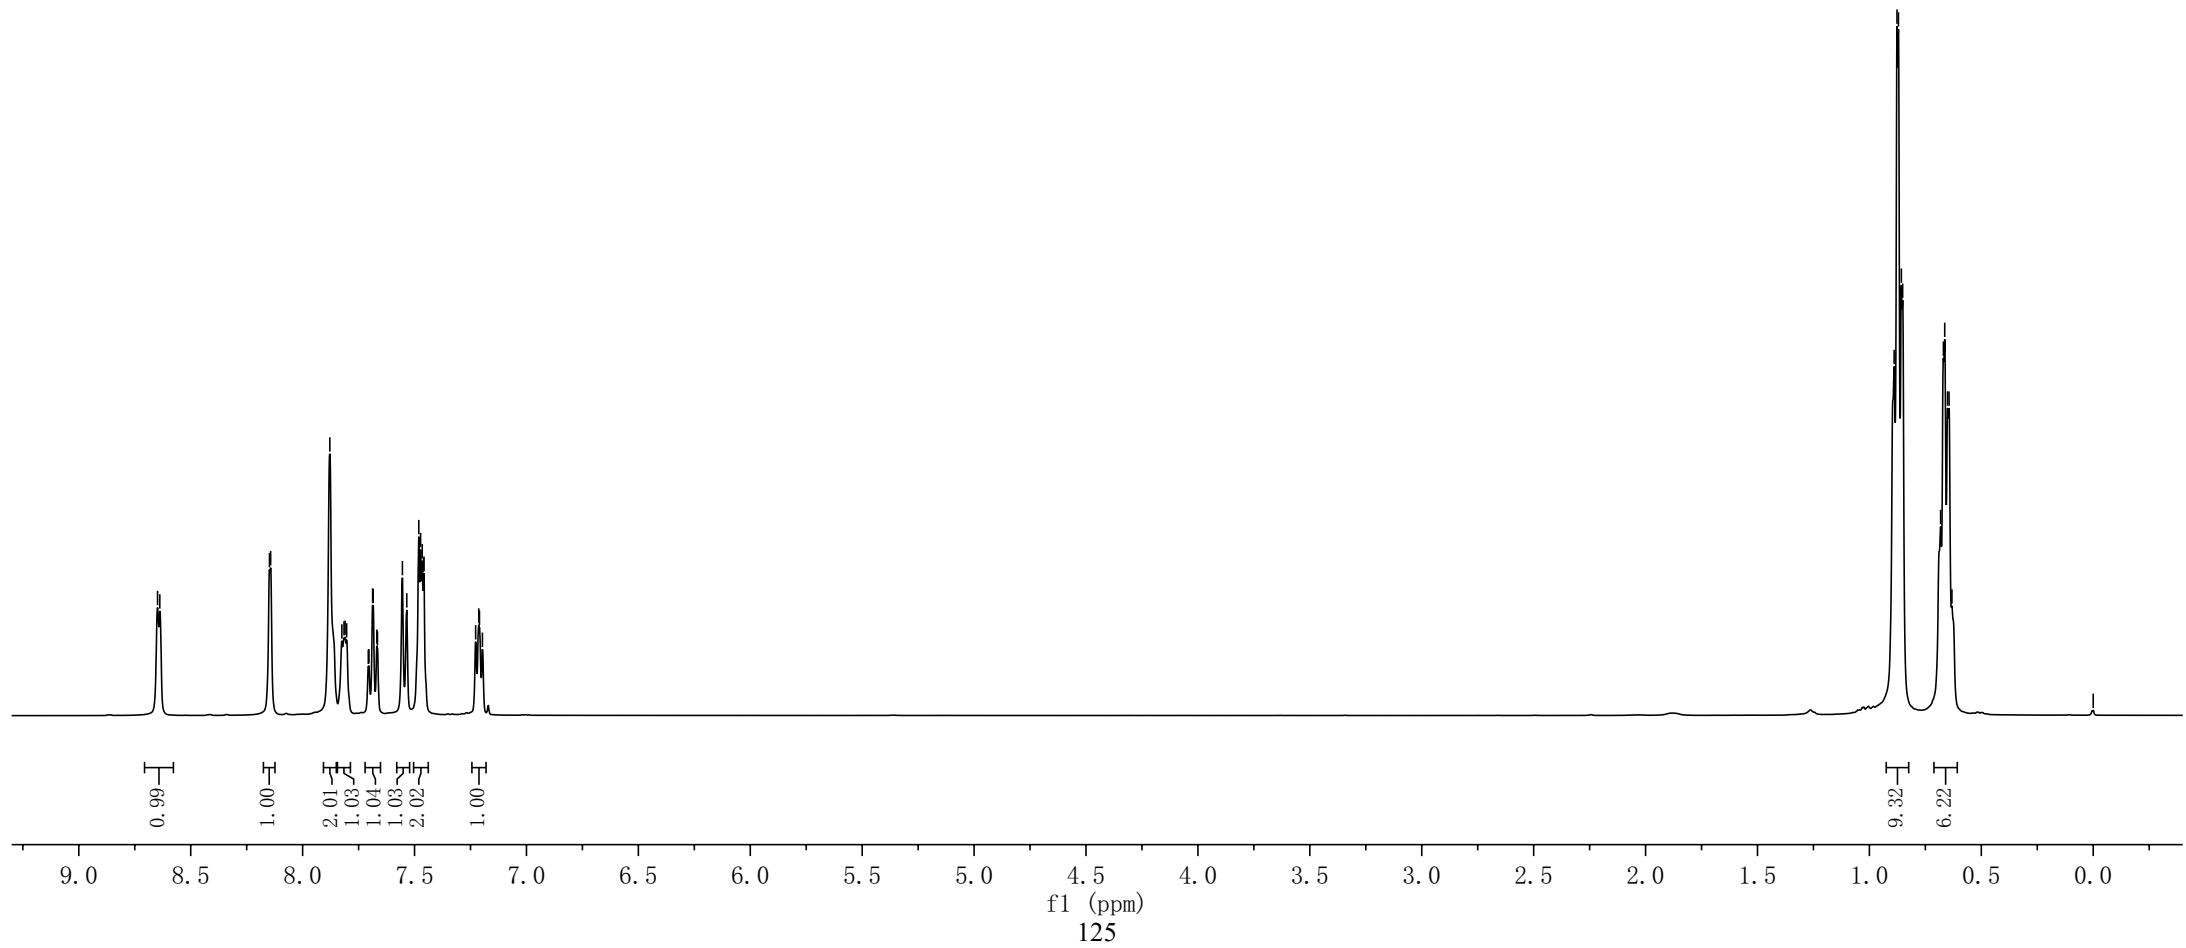

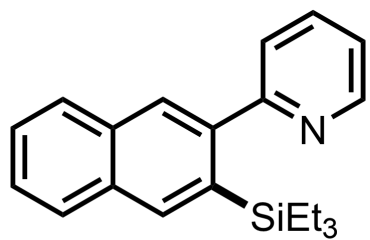

**2m**

**<sup>13</sup>C NMR spectrum (100 MHz, CDCl<sub>3</sub>)**

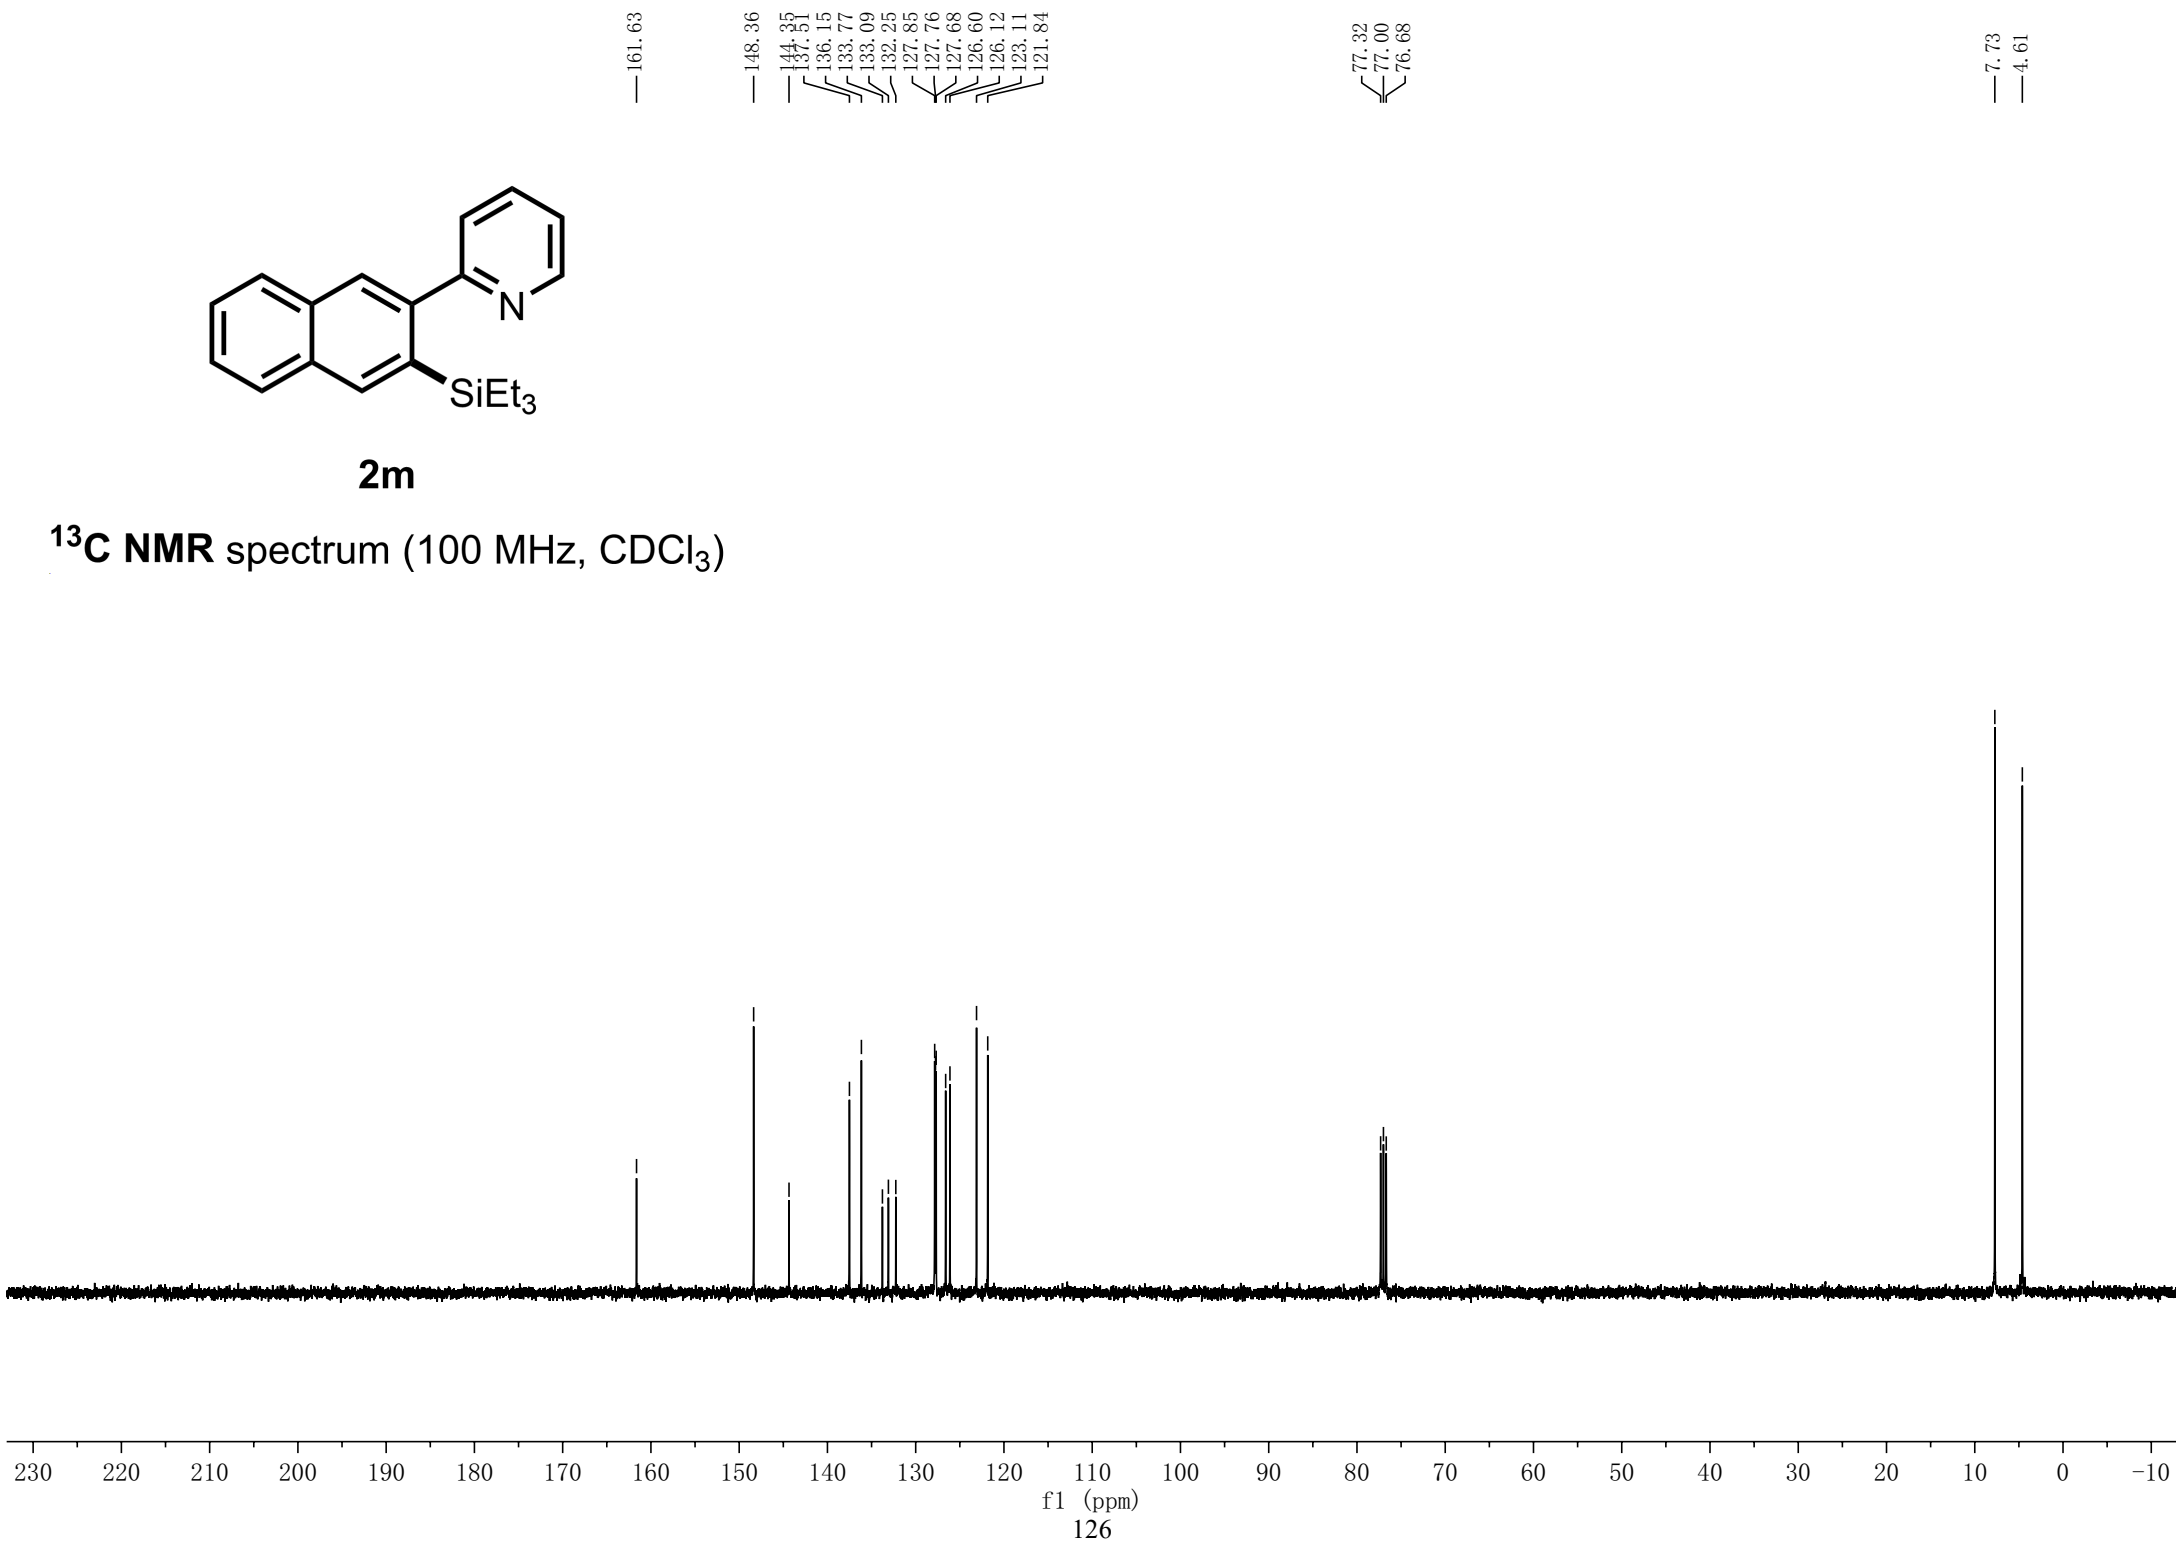

8.75  
8.74  
7.87  
7.84  
7.82  
7.74  
7.74  
7.72  
7.69  
7.67  
7.44  
7.43  
7.42  
7.40  
7.40  
7.38  
7.36  
7.33  
7.31  
7.29  
7.27

0.86  
0.84  
0.82  
0.48  
0.46  
0.44  
0.43  
0.00

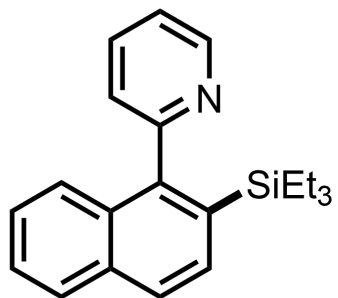

2n

<sup>1</sup>H NMR spectrum (400 MHz, CDCl<sub>3</sub>)

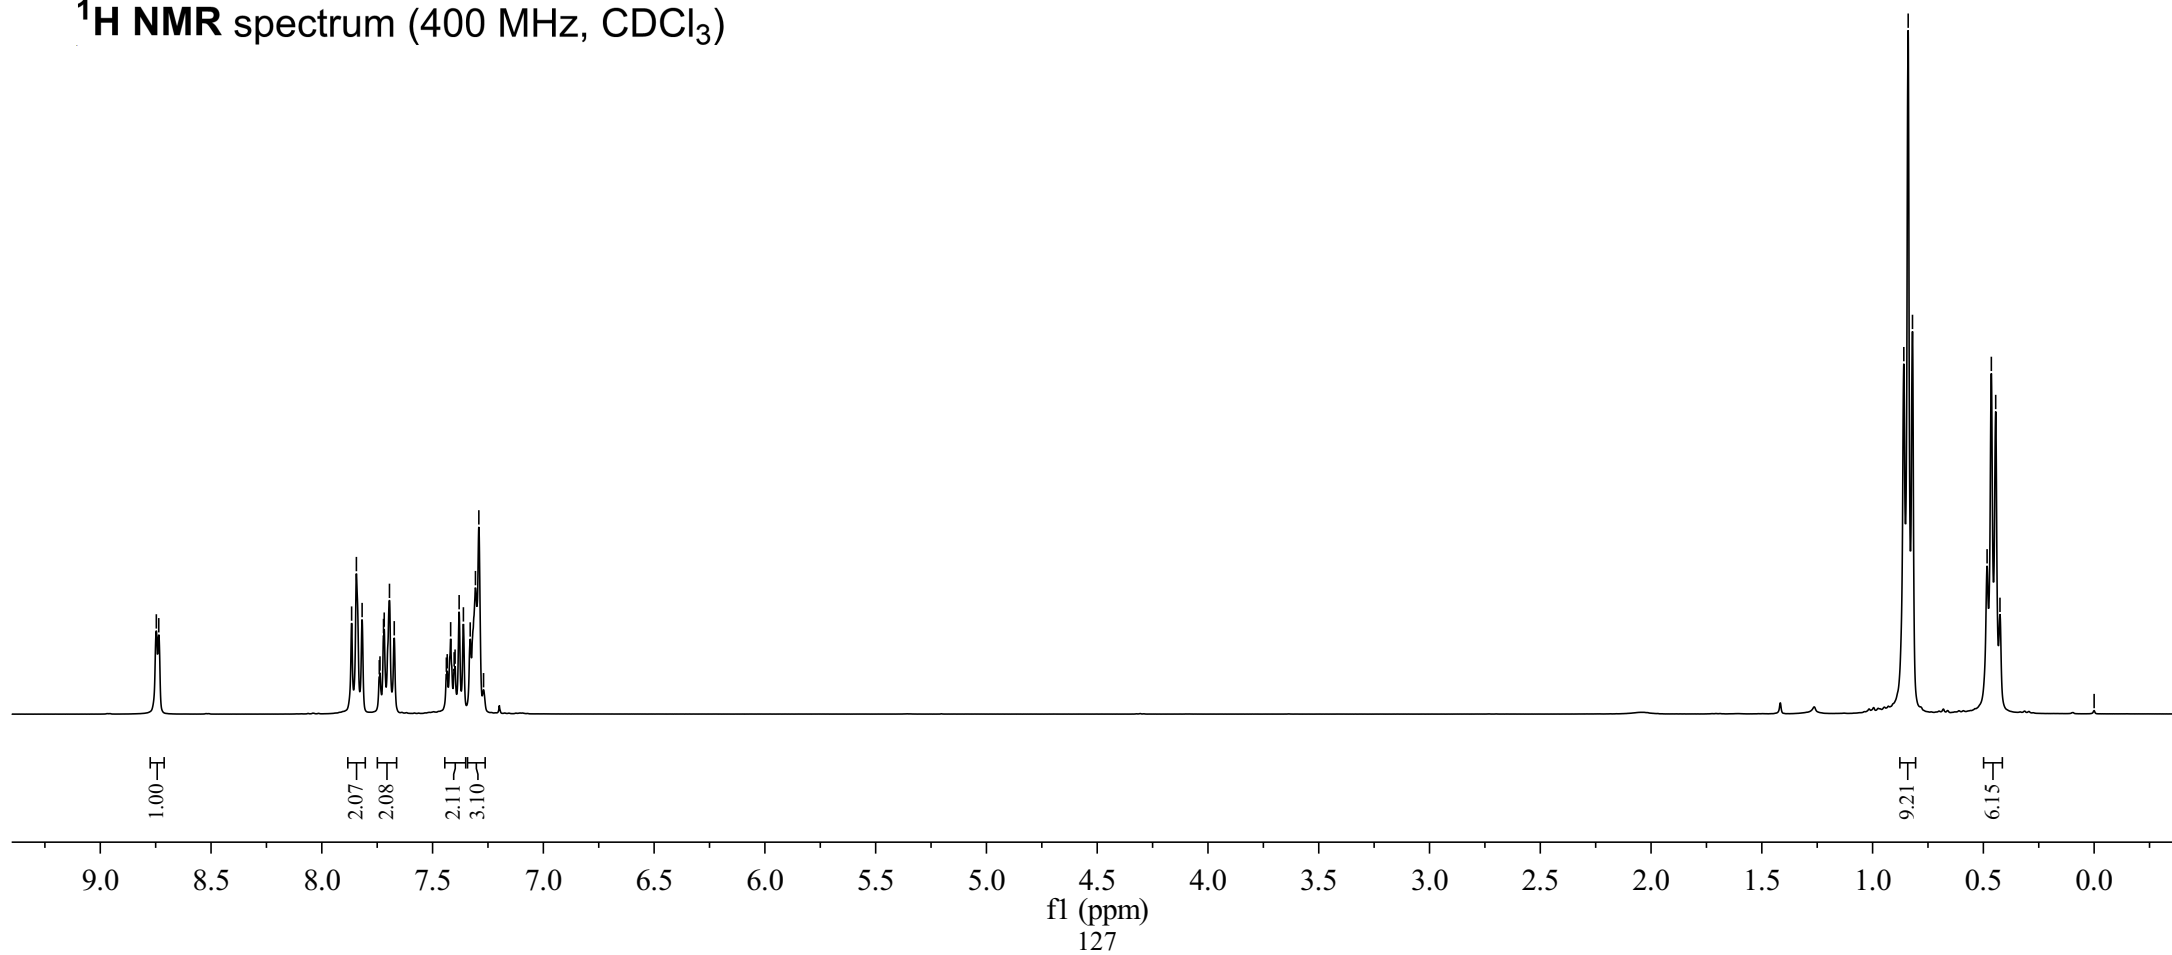

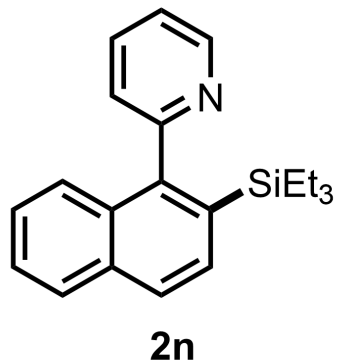

**<sup>13</sup>C NMR spectrum (100 MHz, CDCl<sub>3</sub>)**

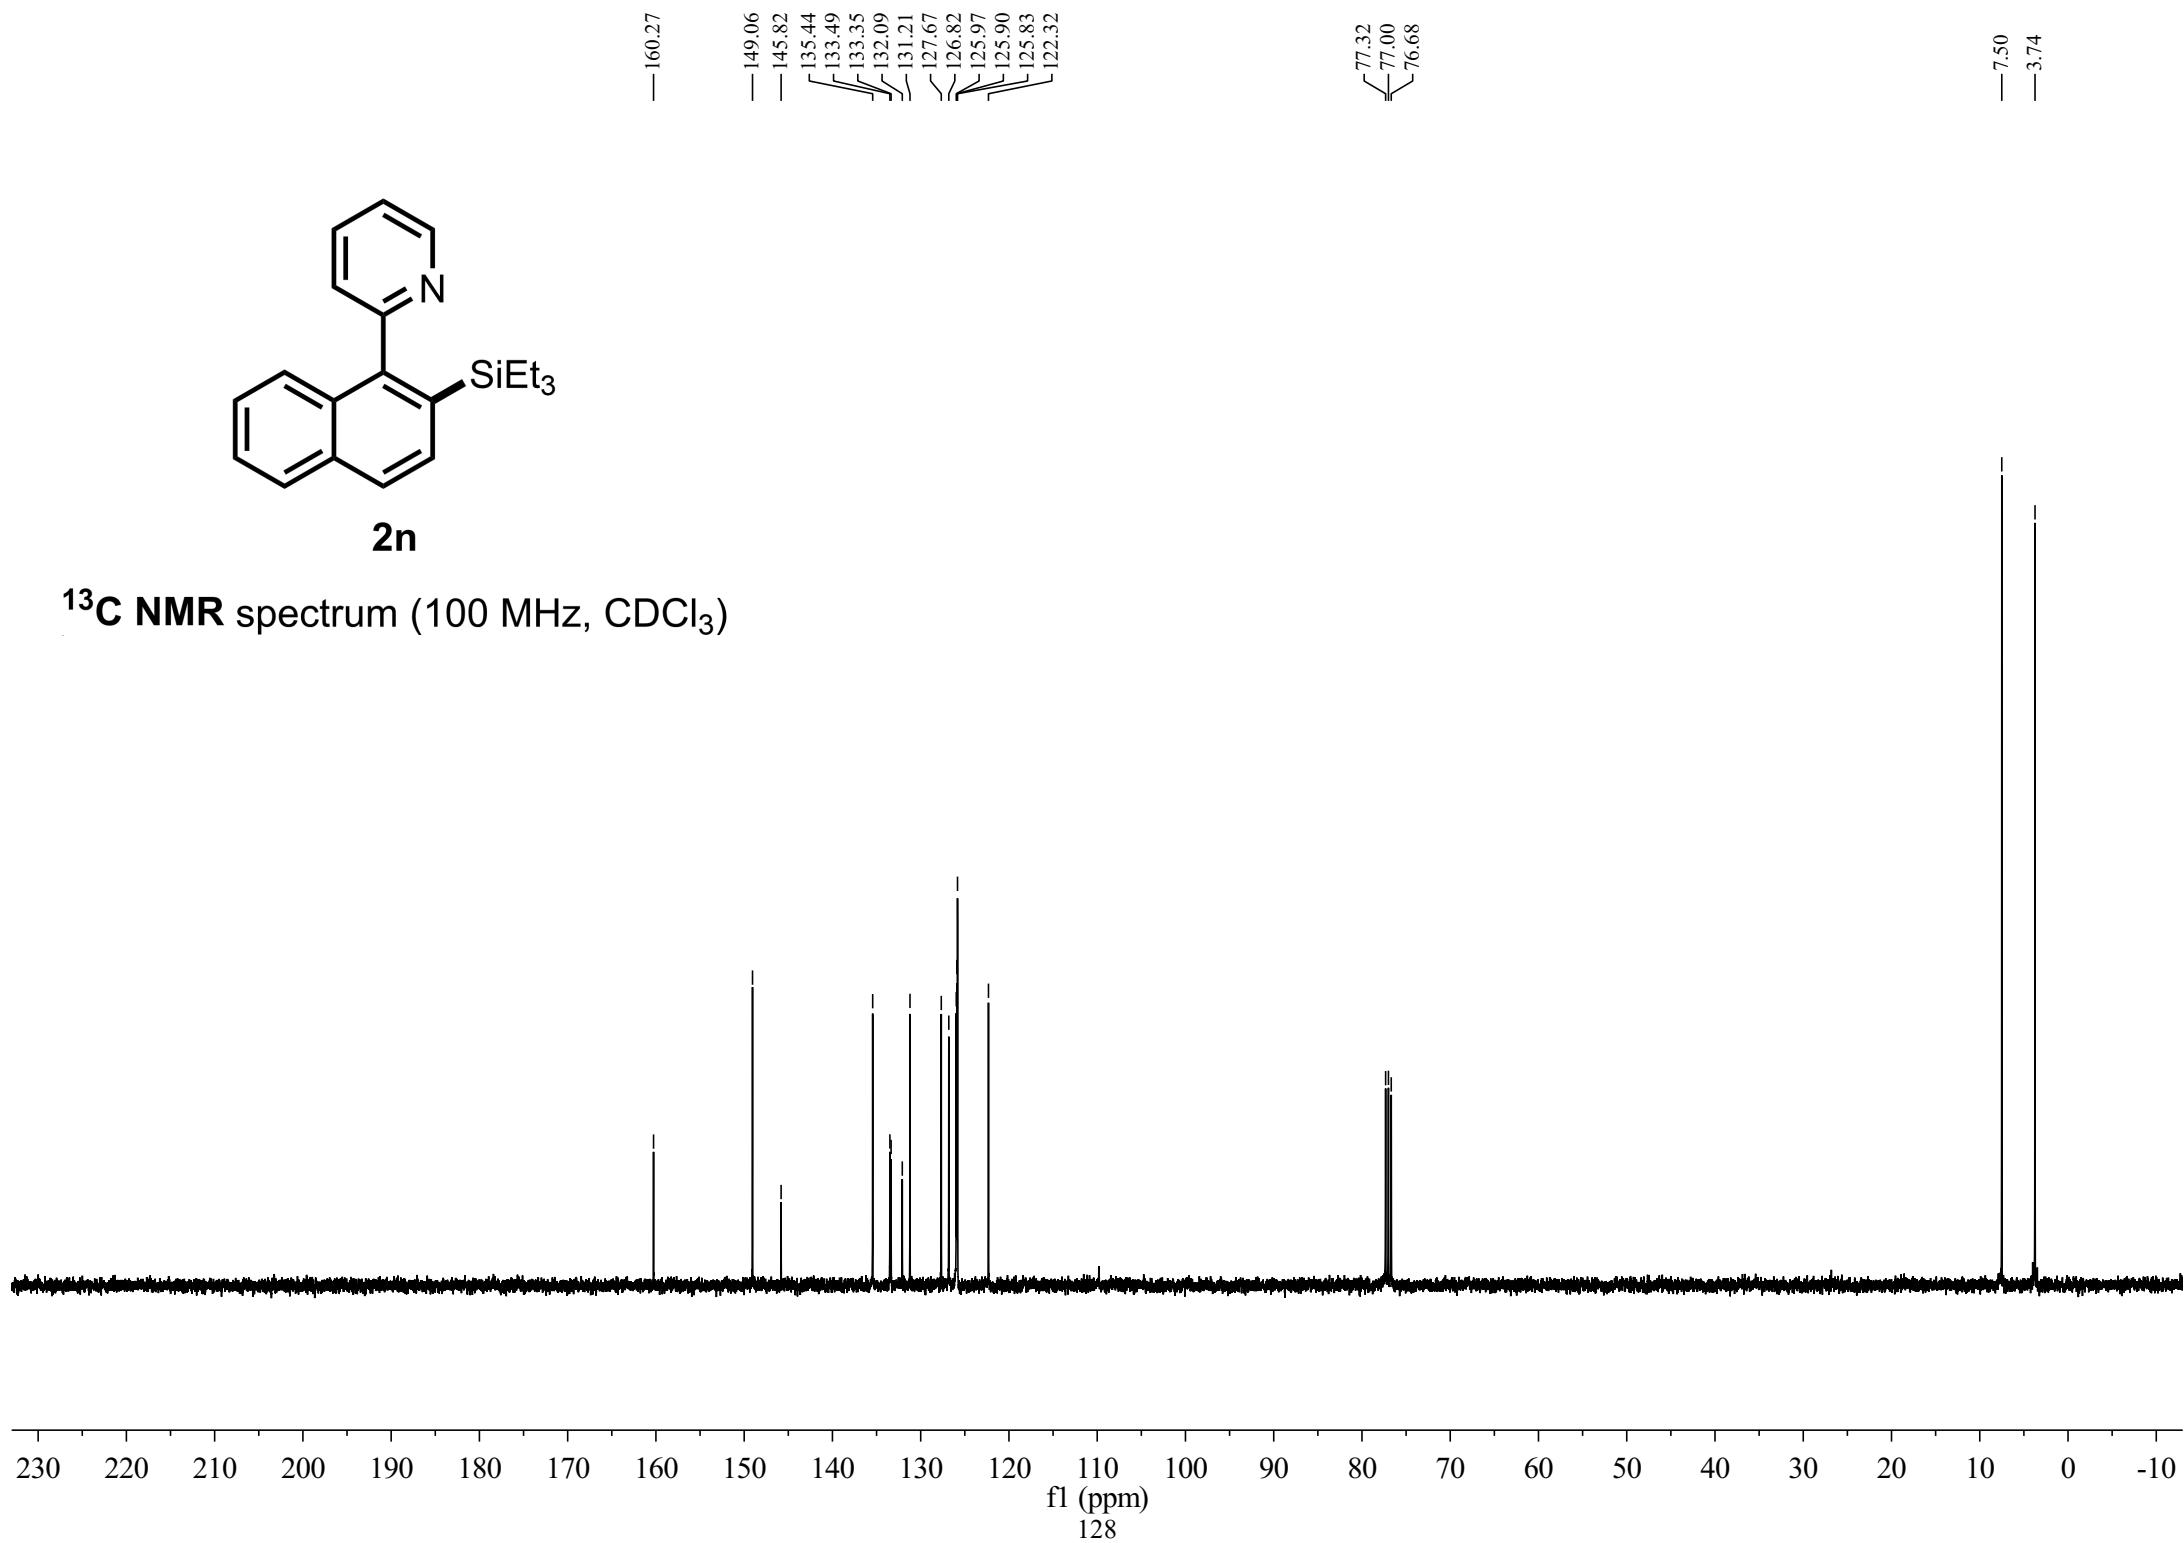



8.56  
8.55  
7.84  
7.82  
7.75  
7.72  
7.72  
7.71  
7.71  
7.70  
7.65  
7.63  
7.62  
7.60  
7.46  
7.44  
7.43  
7.42  
7.41  
7.36  
7.36  
7.35  
7.34

0.74  
0.72  
0.70  
0.33  
0.31  
0.29  
0.27  
0.00

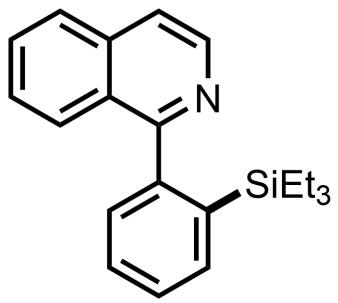

**2o**

<sup>1</sup>H NMR spectrum (400 MHz, CDCl<sub>3</sub>)

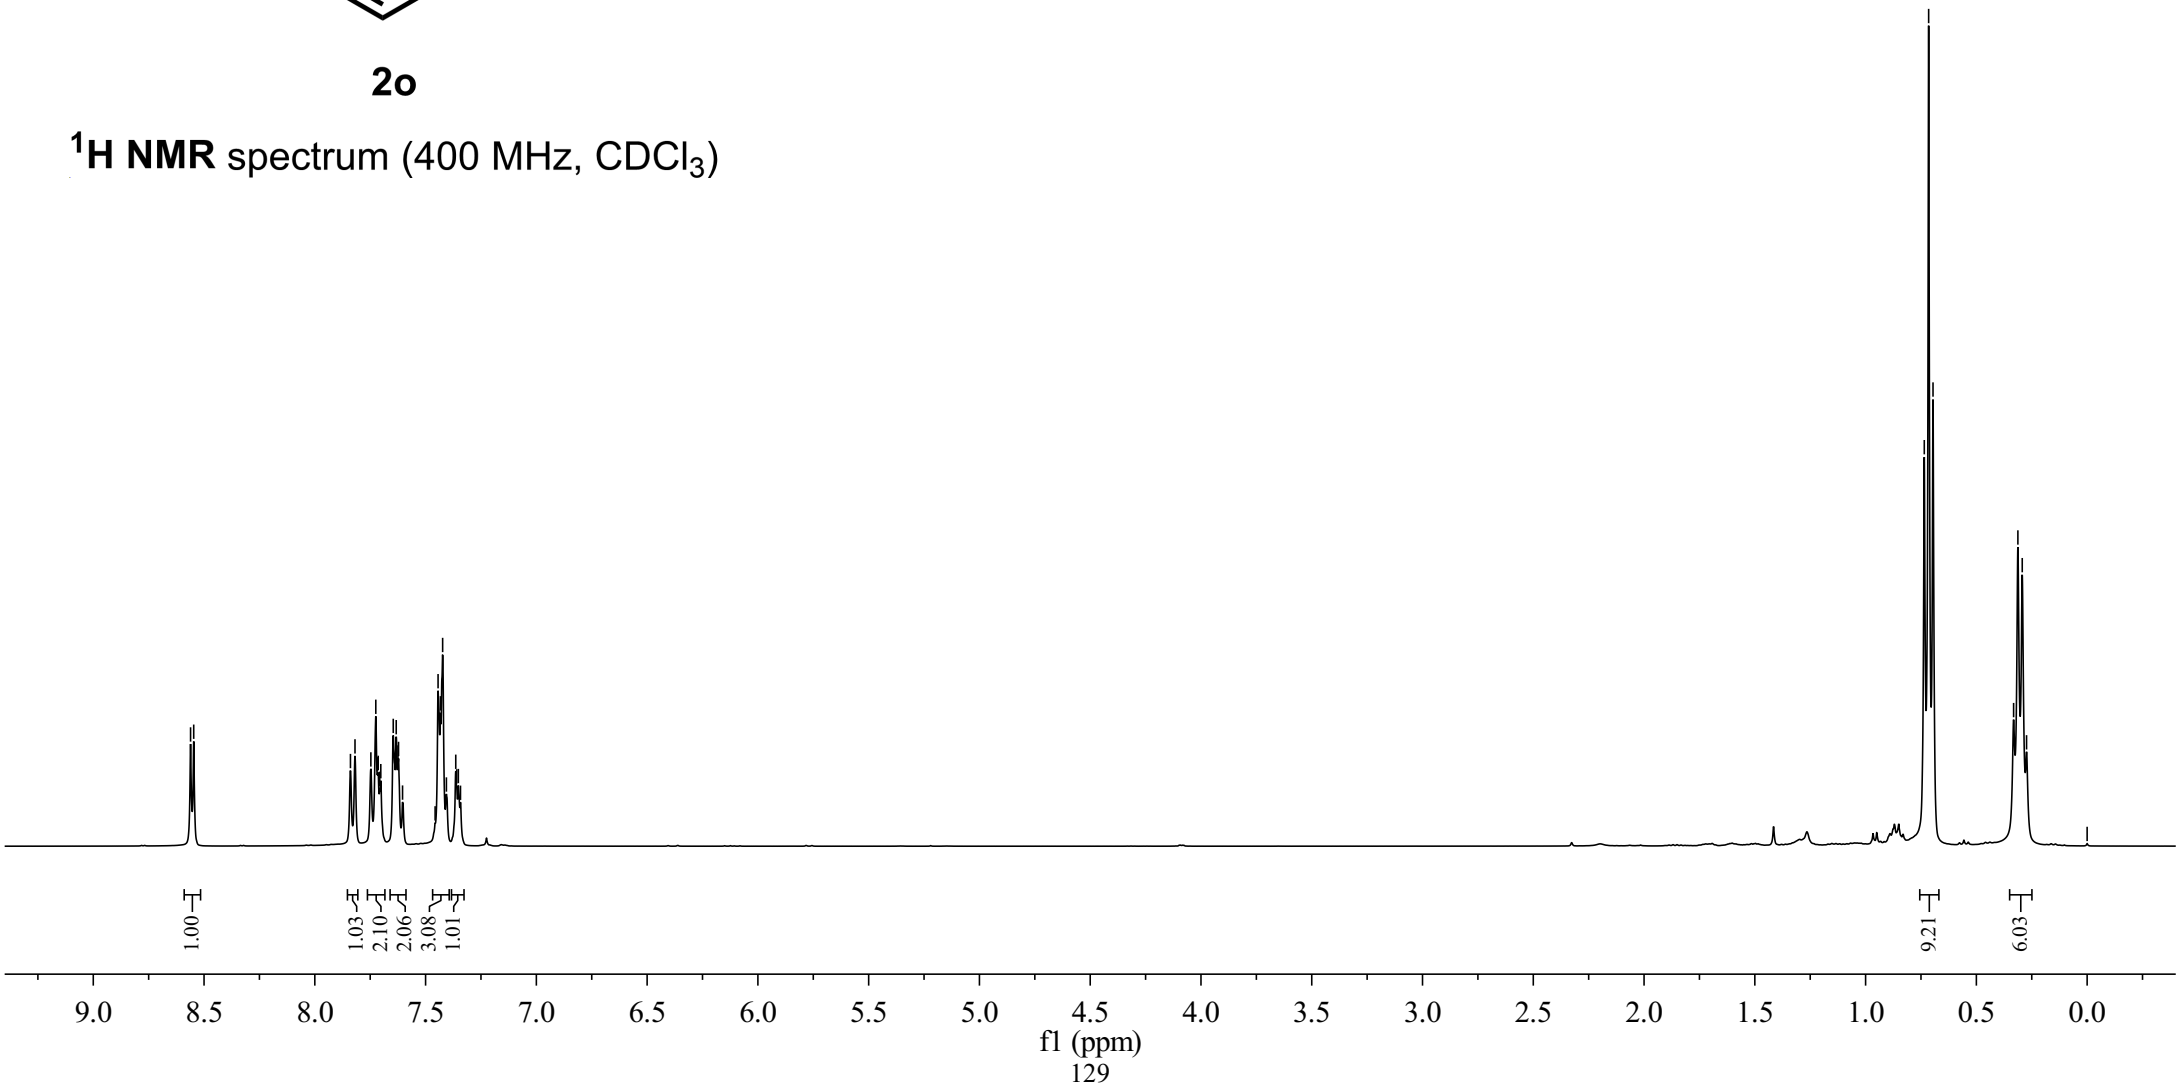

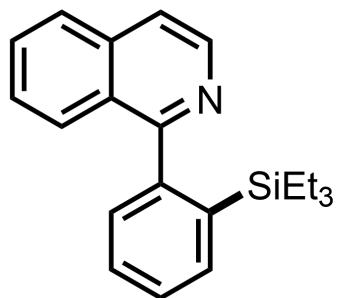

**2o**

<sup>13</sup>C NMR spectrum (100 MHz, CDCl<sub>3</sub>)

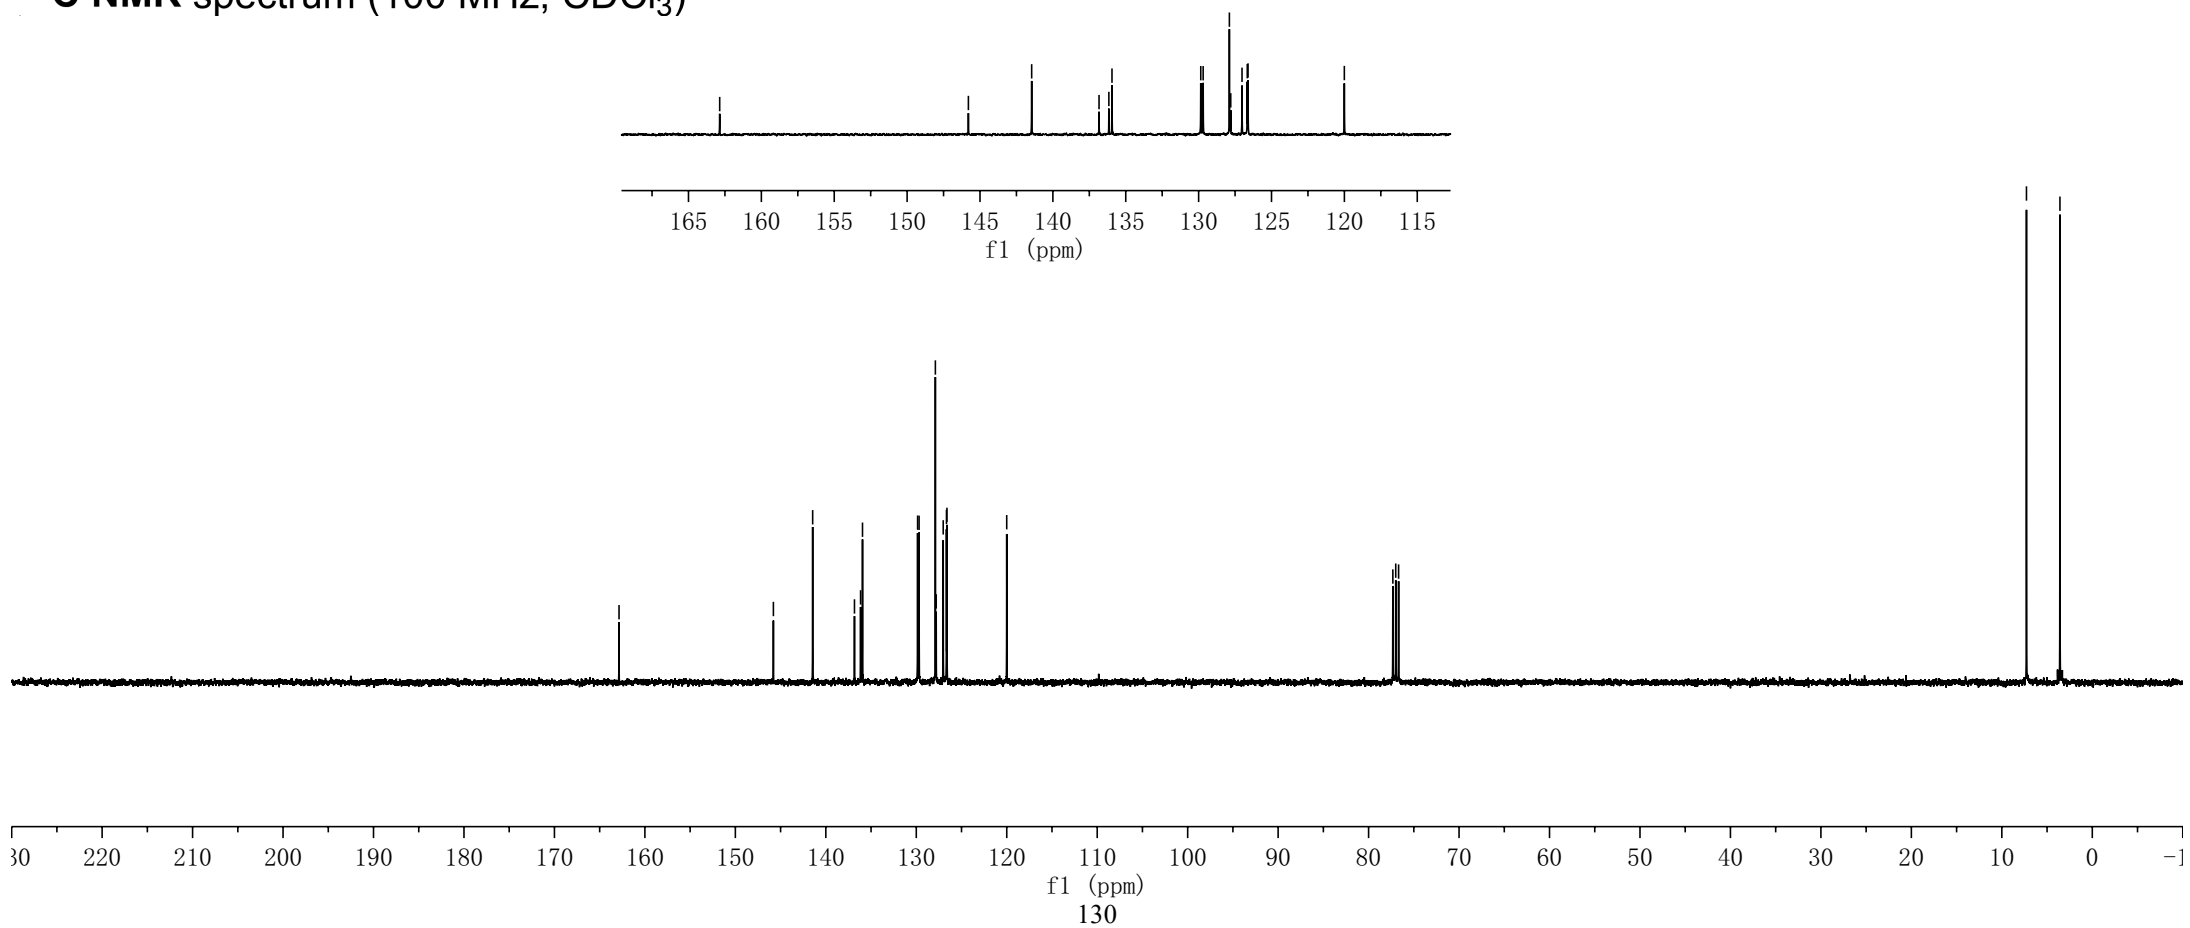

8.69  
8.67  
7.95  
7.93  
7.90  
7.88  
7.87  
7.79  
7.77  
7.75  
7.64  
7.62  
7.61  
7.60  
7.42  
7.41  
7.39  
7.37  
7.32  
7.31  
7.29  
7.20  
7.18  
7.16  
7.16  
6.98  
6.95

0.73  
0.71  
0.69  
0.36  
0.34  
0.32  
0.30  
0.28  
0.26  
0.21  
0.19  
0.17  
0.15  
0.13  
0.11  
-0.00

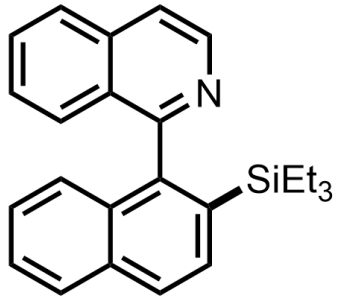

2p

<sup>1</sup>H NMR spectrum (400 MHz, CDCl<sub>3</sub>)

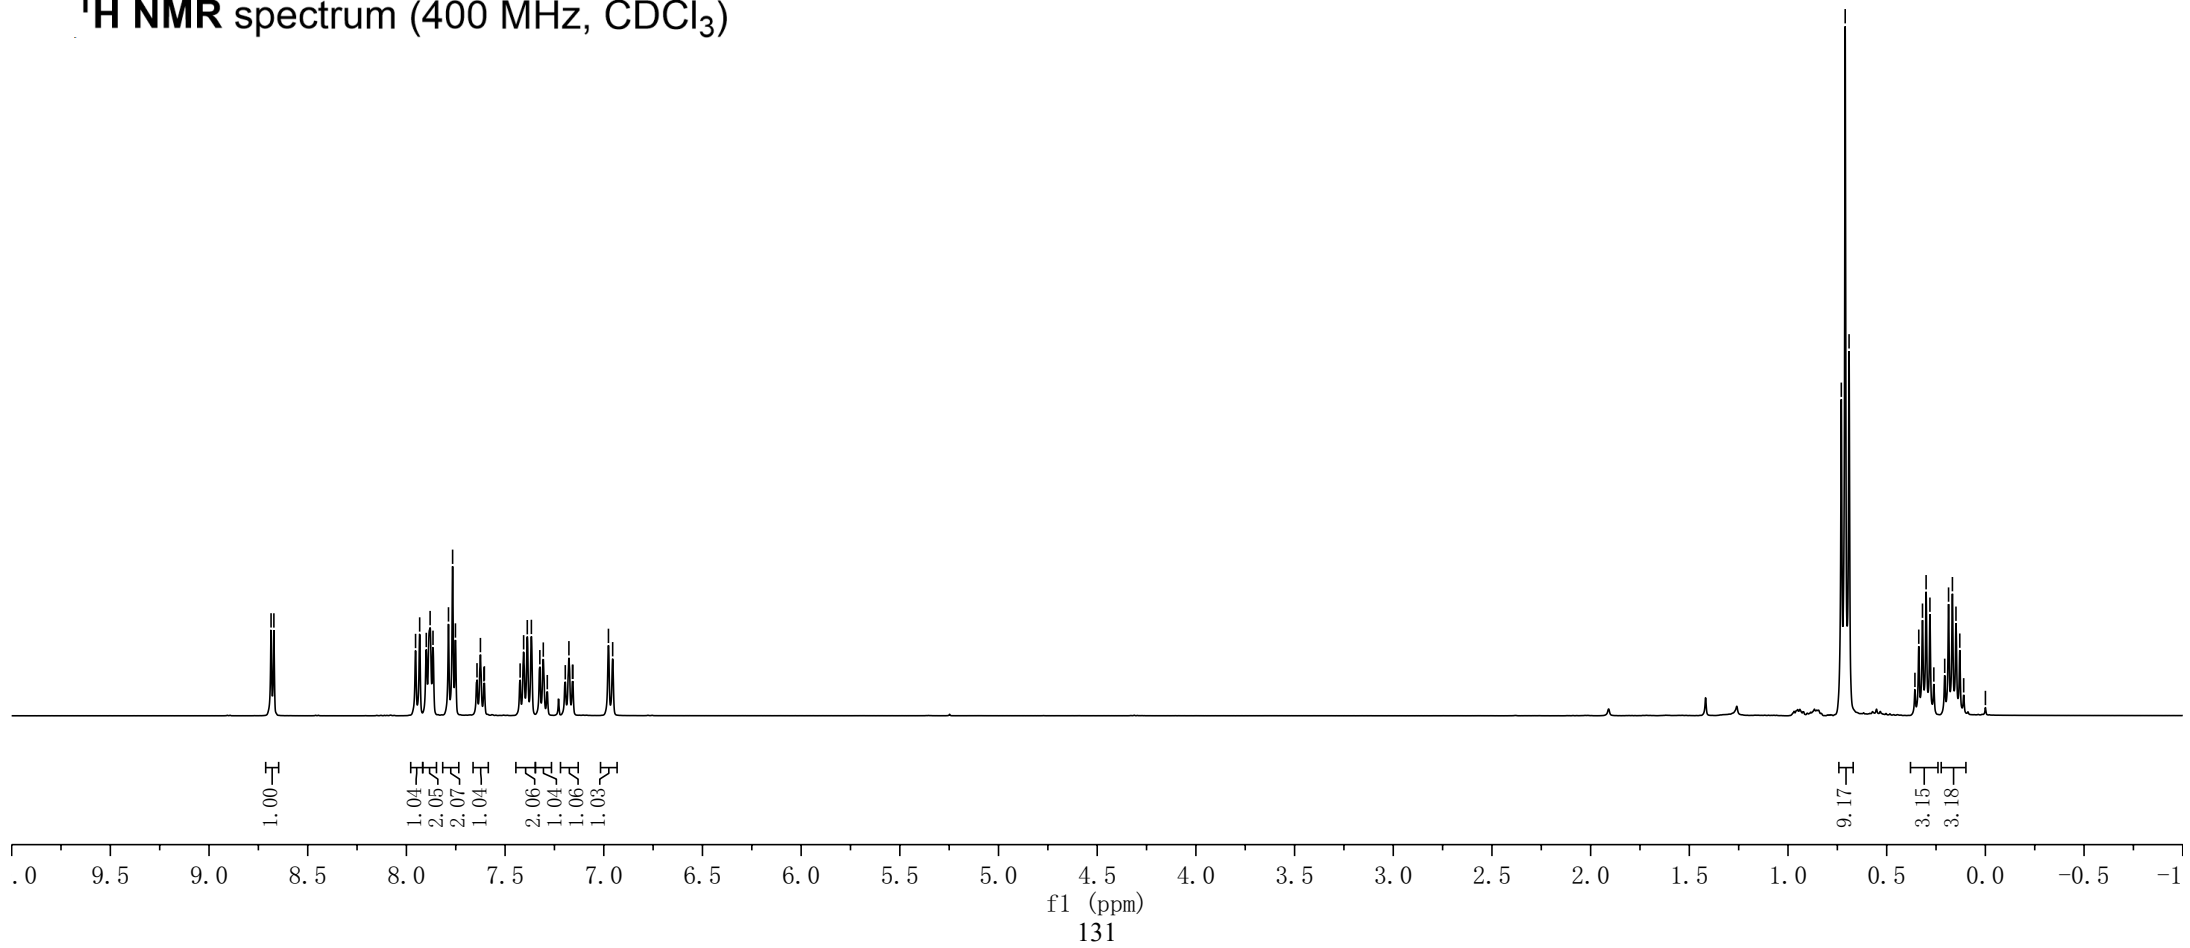

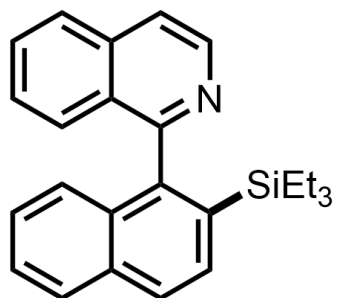

**2p**

<sup>13</sup>C NMR spectrum (100 MHz, CDCl<sub>3</sub>)

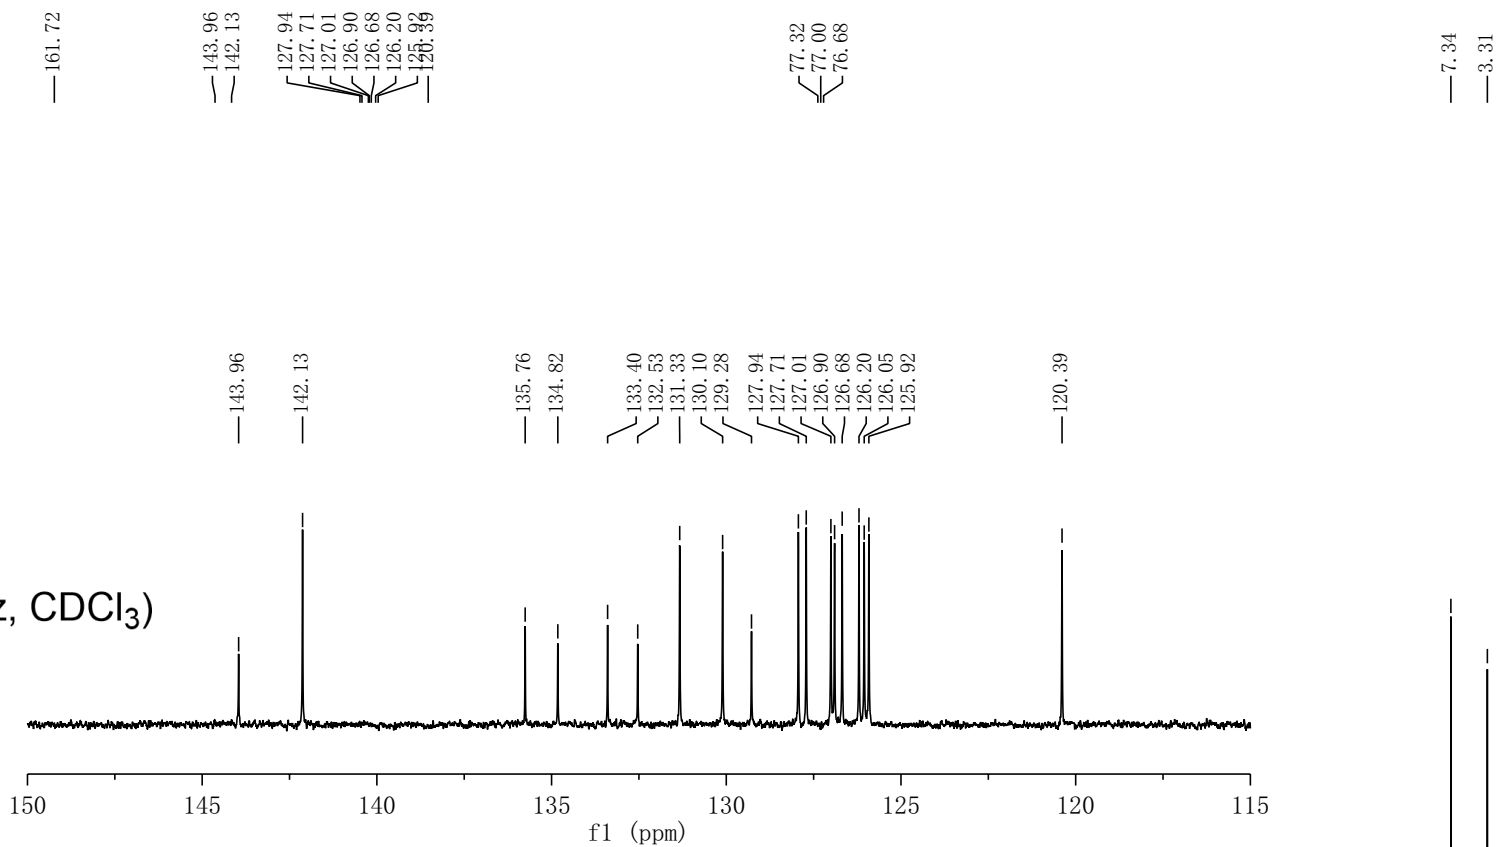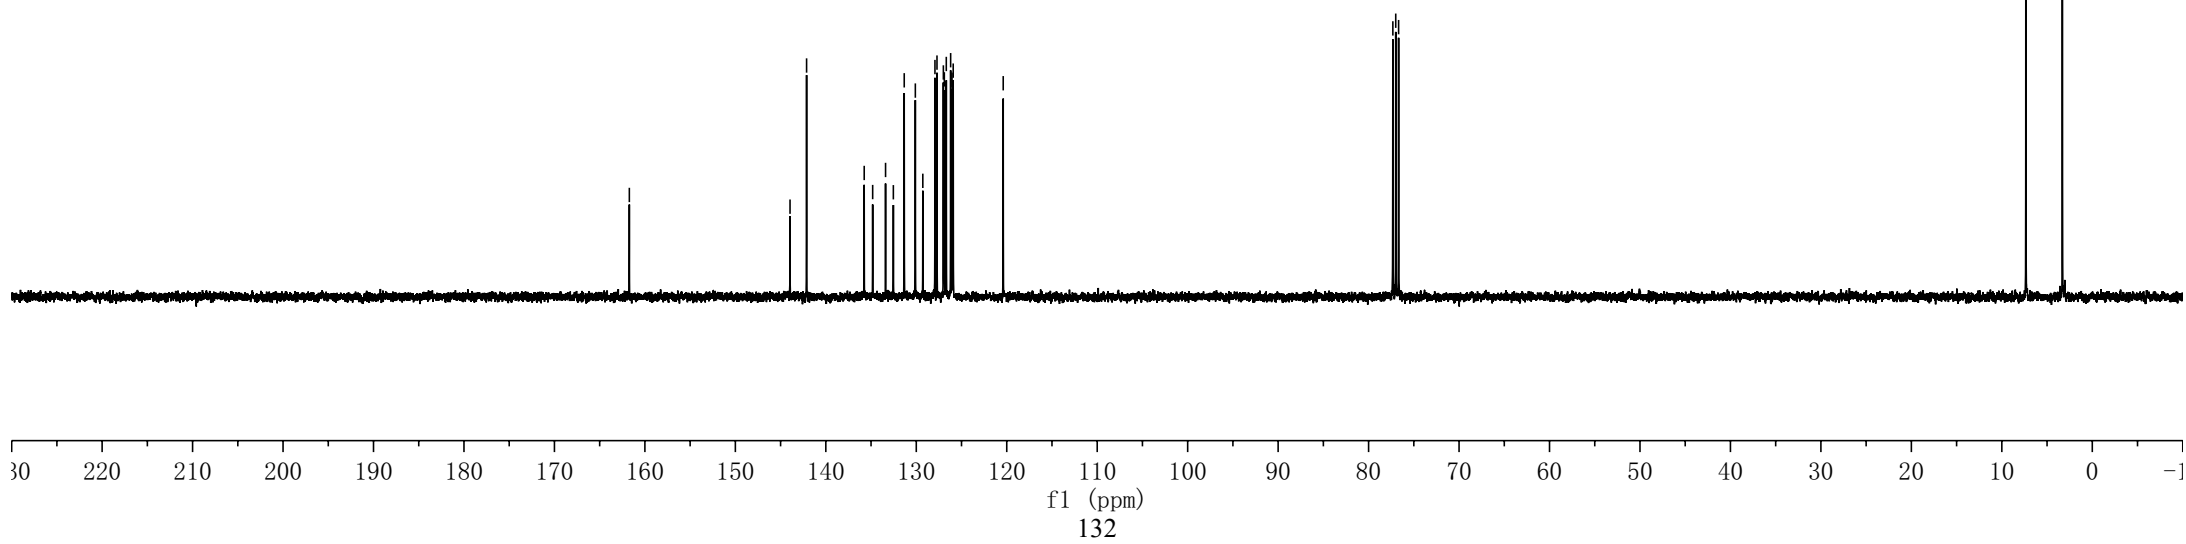

7.92  
7.90  
7.75  
7.75  
7.73  
7.68  
7.67  
7.66  
7.66  
7.56  
7.54  
7.52  
7.49  
7.48  
7.47  
7.46  
7.45  
7.44  
7.43  
7.43  
7.41

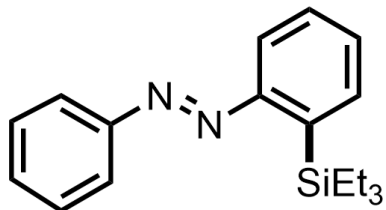

**2q**

**<sup>1</sup>H NMR spectrum (400 MHz, CDCl<sub>3</sub>)**

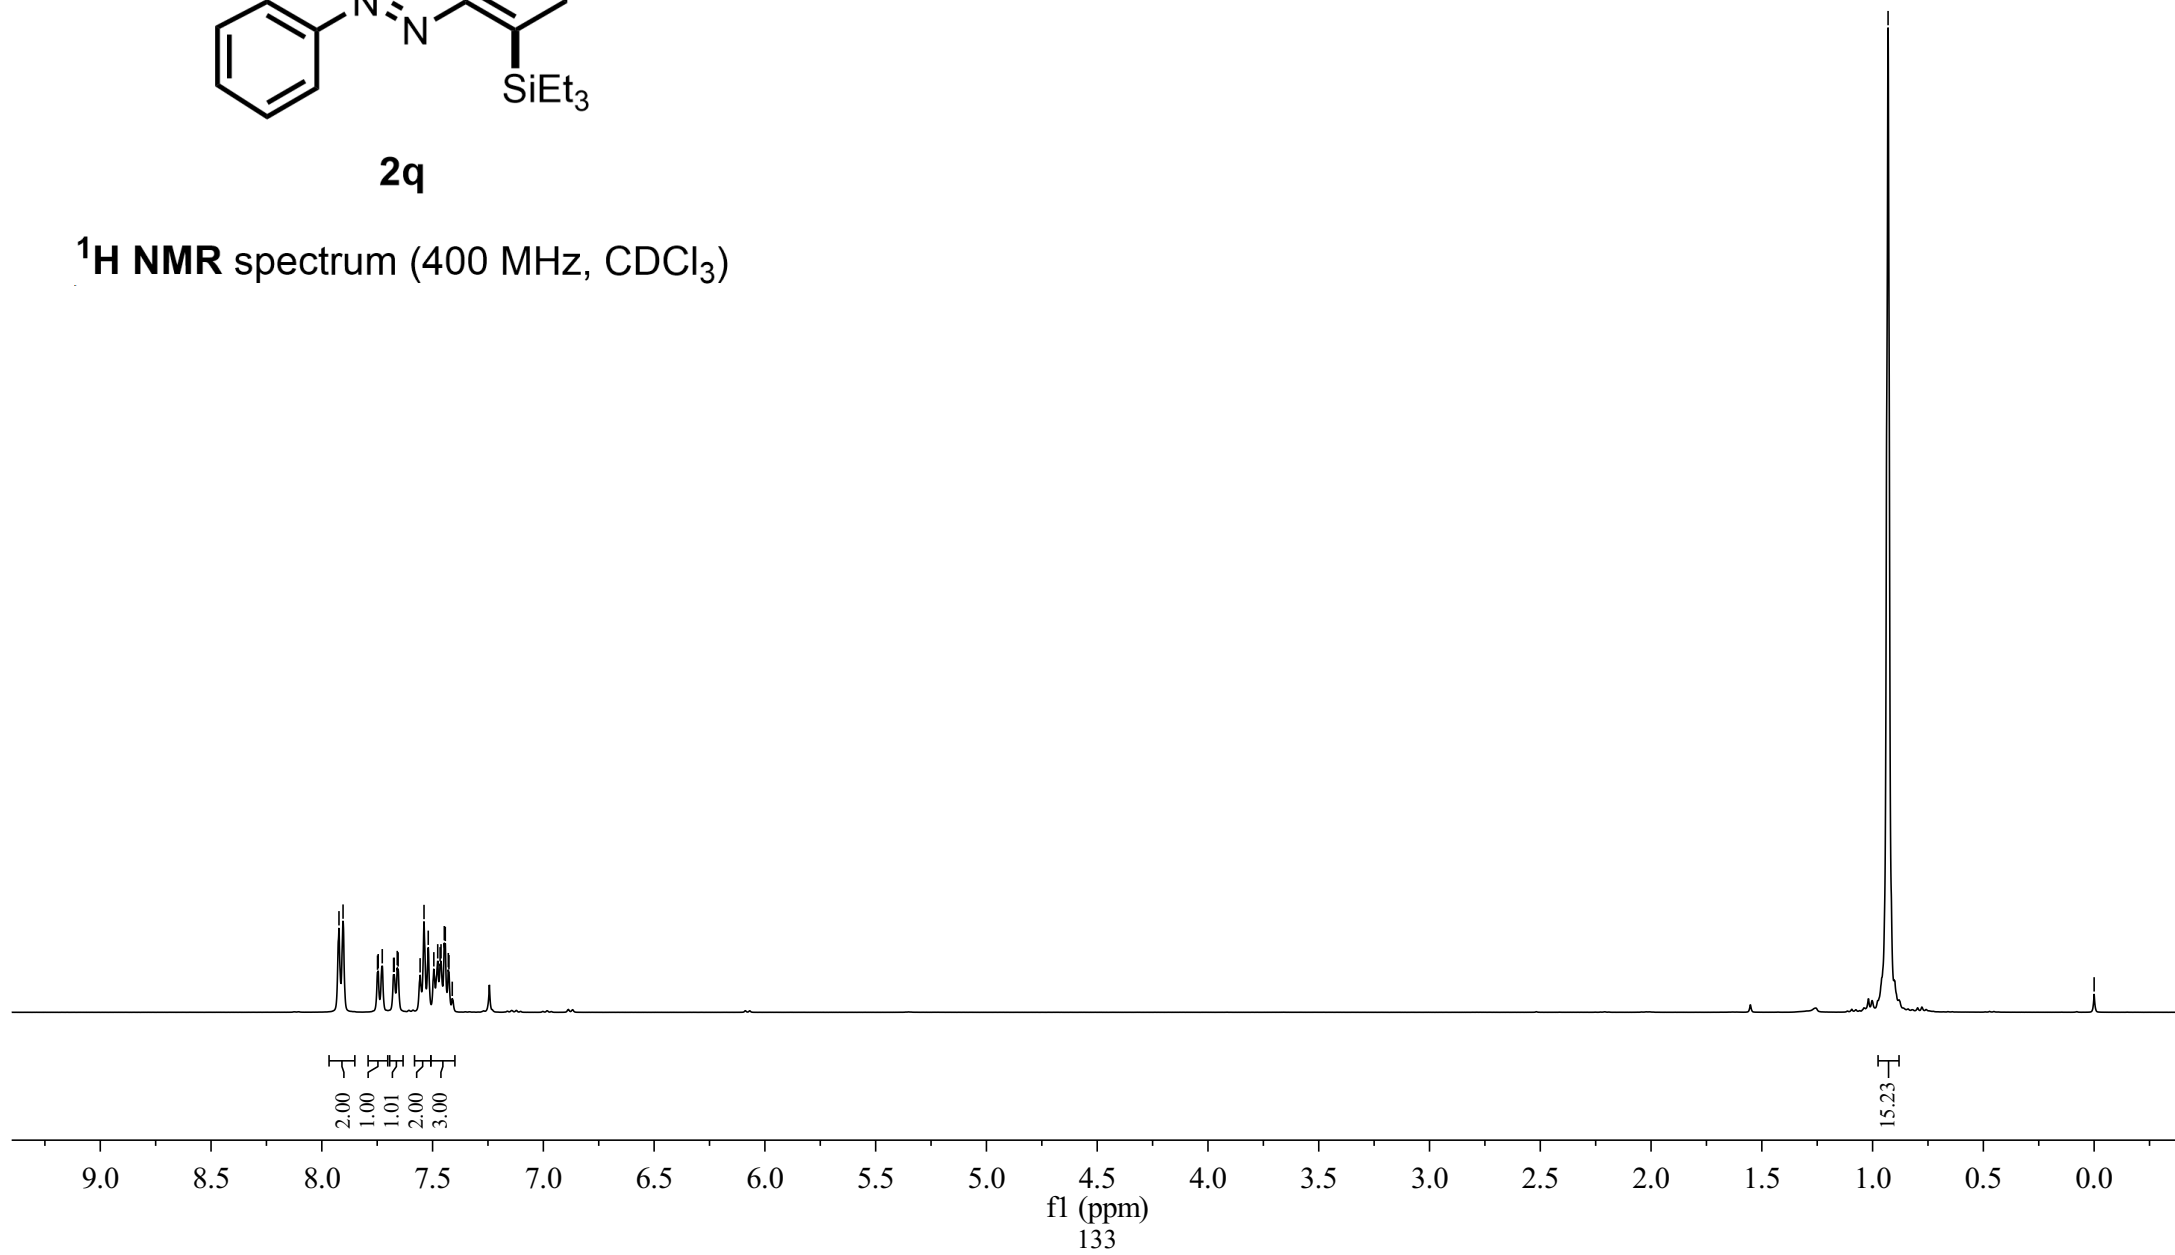

0.00

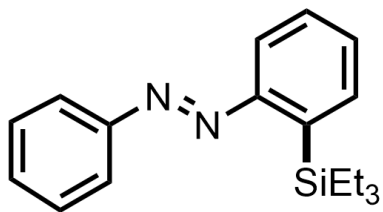

2q

157.80  
152.46  
138.94  
135.82  
130.86  
129.93  
129.79  
129.13  
123.19  
114.58  
77.32  
77.00  
76.68  
7.63  
4.58

<sup>13</sup>C NMR spectrum (100 MHz, CDCl<sub>3</sub>)

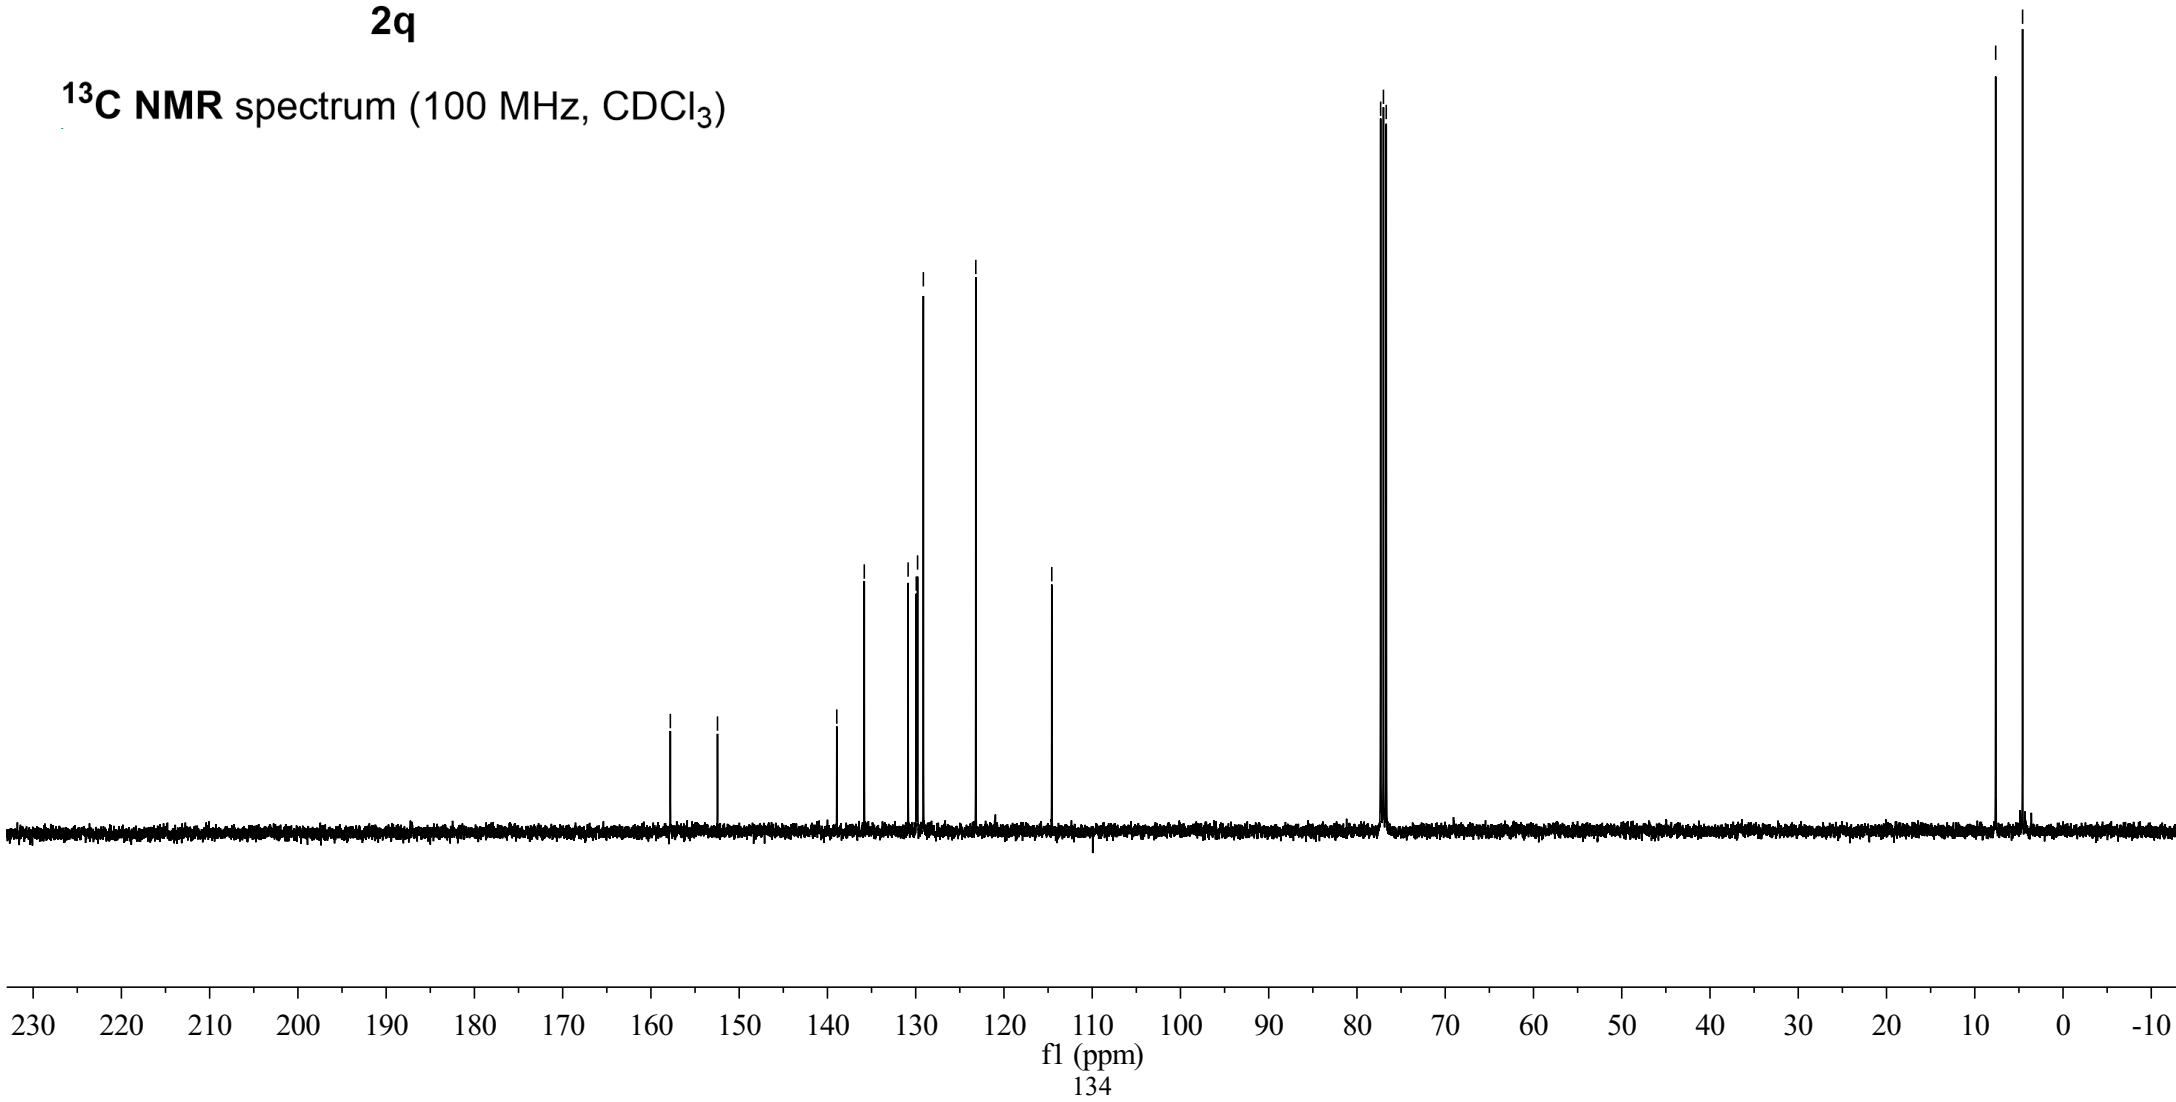

7.67  
7.66  
7.62  
7.61  
7.61  
7.60  
7.59  
7.58  
7.45  
7.44  
7.43  
7.42  
7.41  
7.40  
7.39  
7.39  
7.37  
7.37  
7.27  
7.26  
7.25  
7.25  
7.25  
6.42  
6.42  
6.41

0.87  
0.85  
0.83  
0.58  
0.56  
0.54  
0.52  
0.00

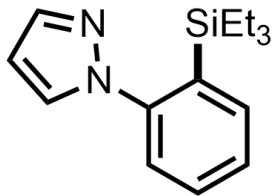

**2r**

<sup>1</sup>H NMR spectrum (400 MHz, CDCl<sub>3</sub>)

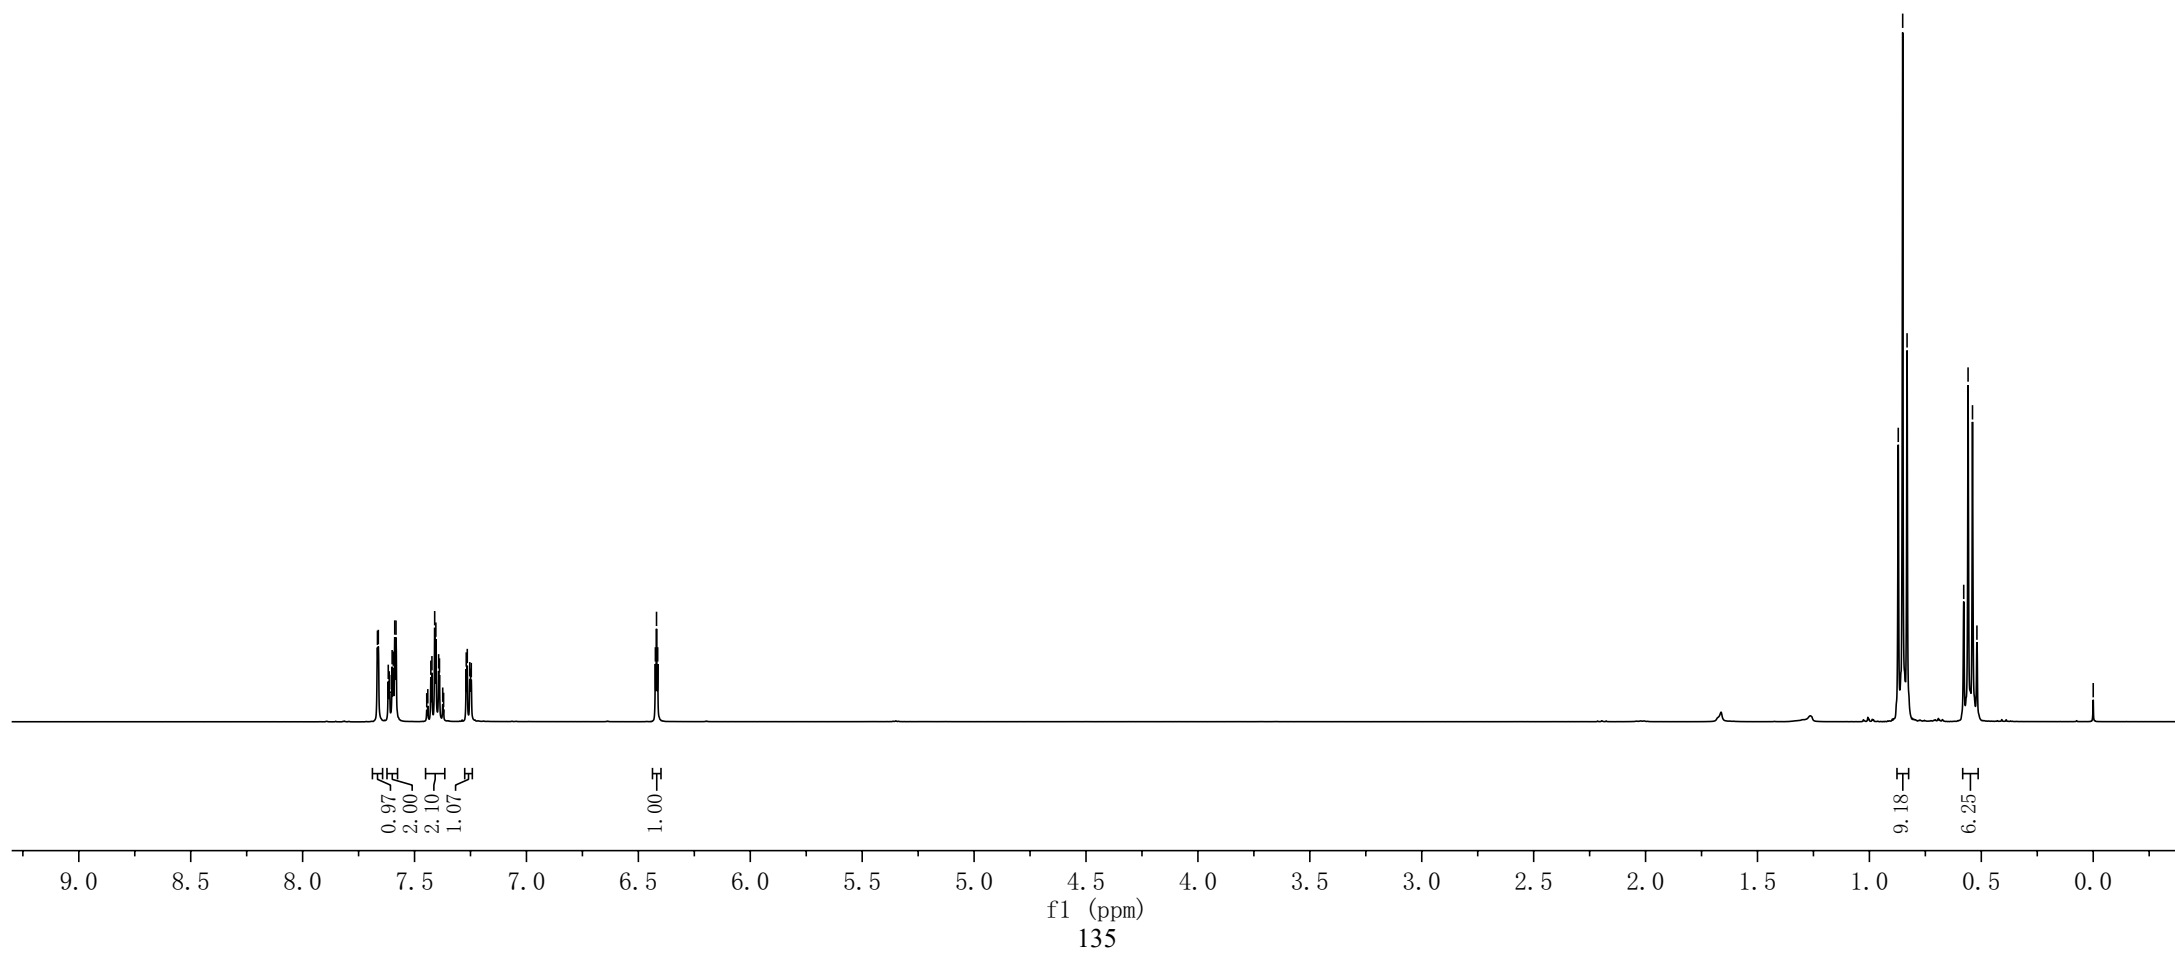

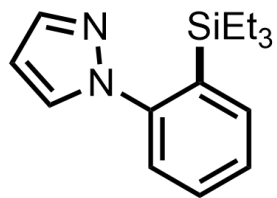

**2r**

**<sup>13</sup>C NMR spectrum (100 MHz, CDCl<sub>3</sub>)**

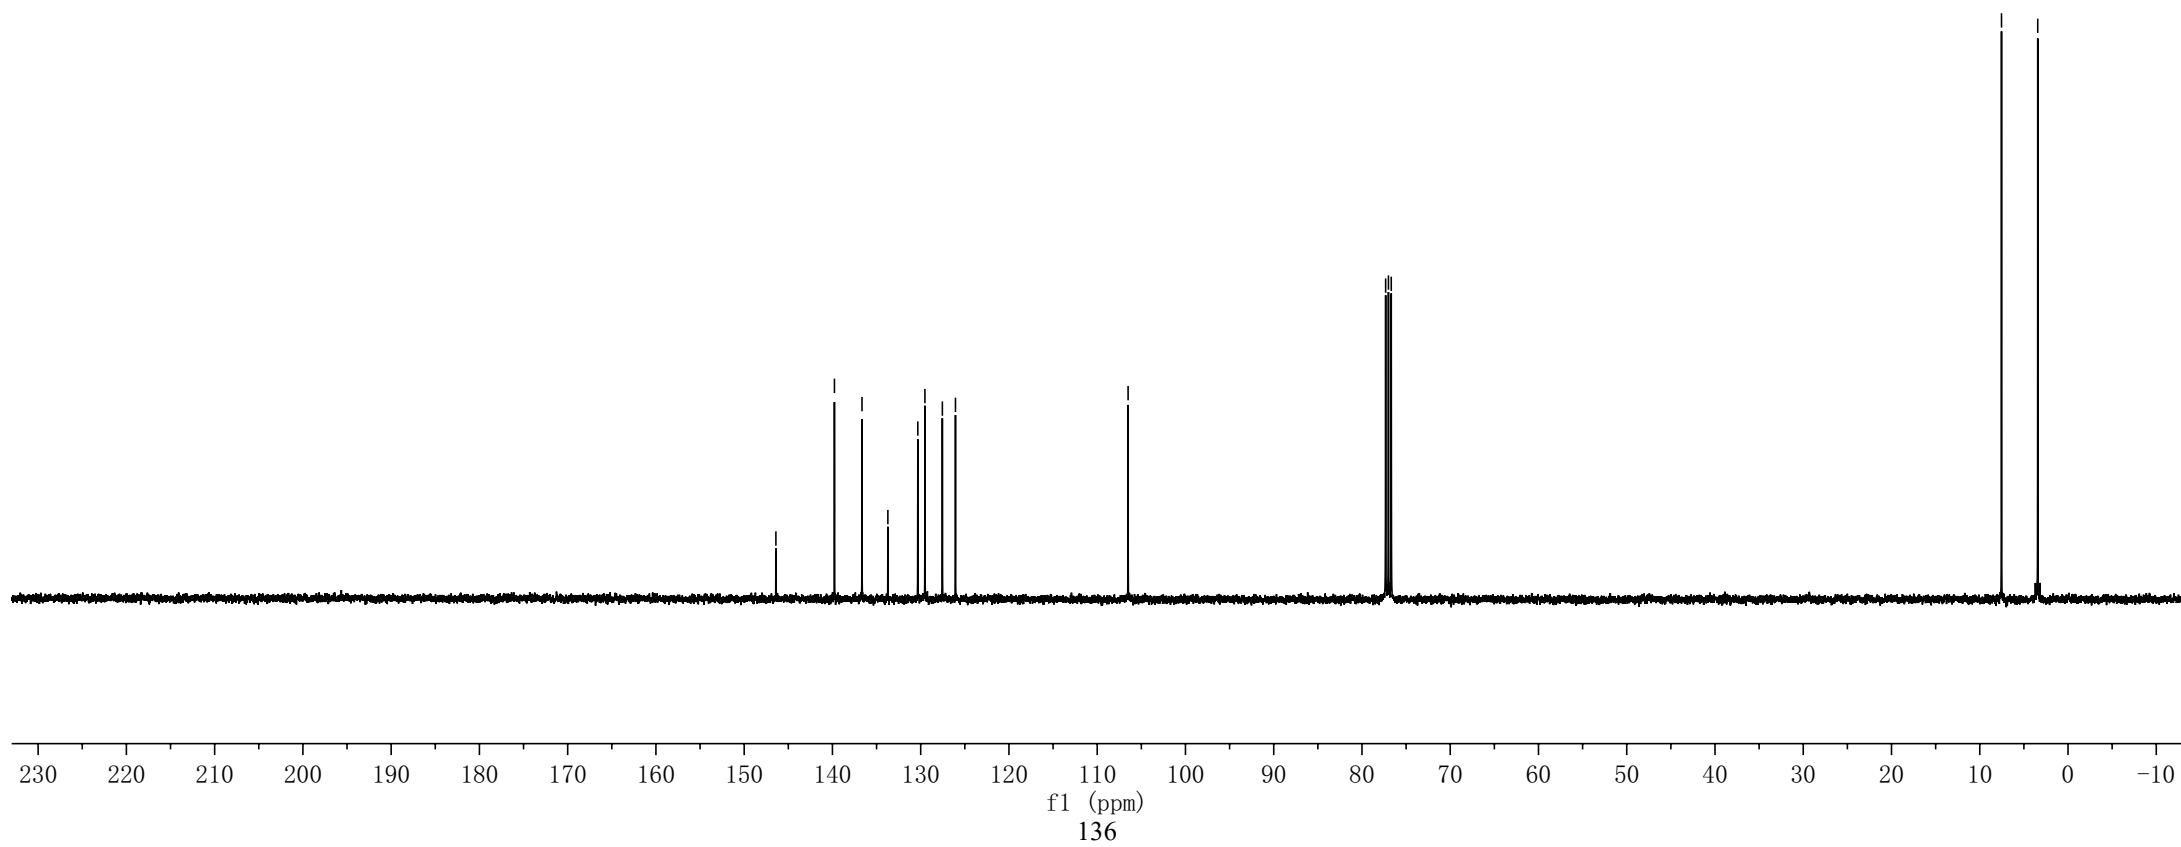



8.84

7.66  
7.64  
7.44  
7.43  
7.42  
7.40  
7.40  
7.38  
7.37  
7.27  
7.25  
7.24  
7.23  
7.20  
7.20  
7.18

0.94  
0.93  
0.93  
0.91  
0.90  
0.88  
0.88  
0.86  
0.85  
0.84  
0.83  
0.83  
0.82

0.00

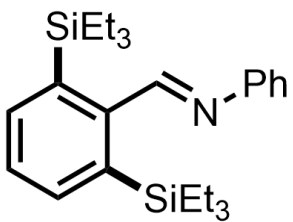

**2s**

<sup>1</sup>H NMR spectrum (400 MHz, CDCl<sub>3</sub>)

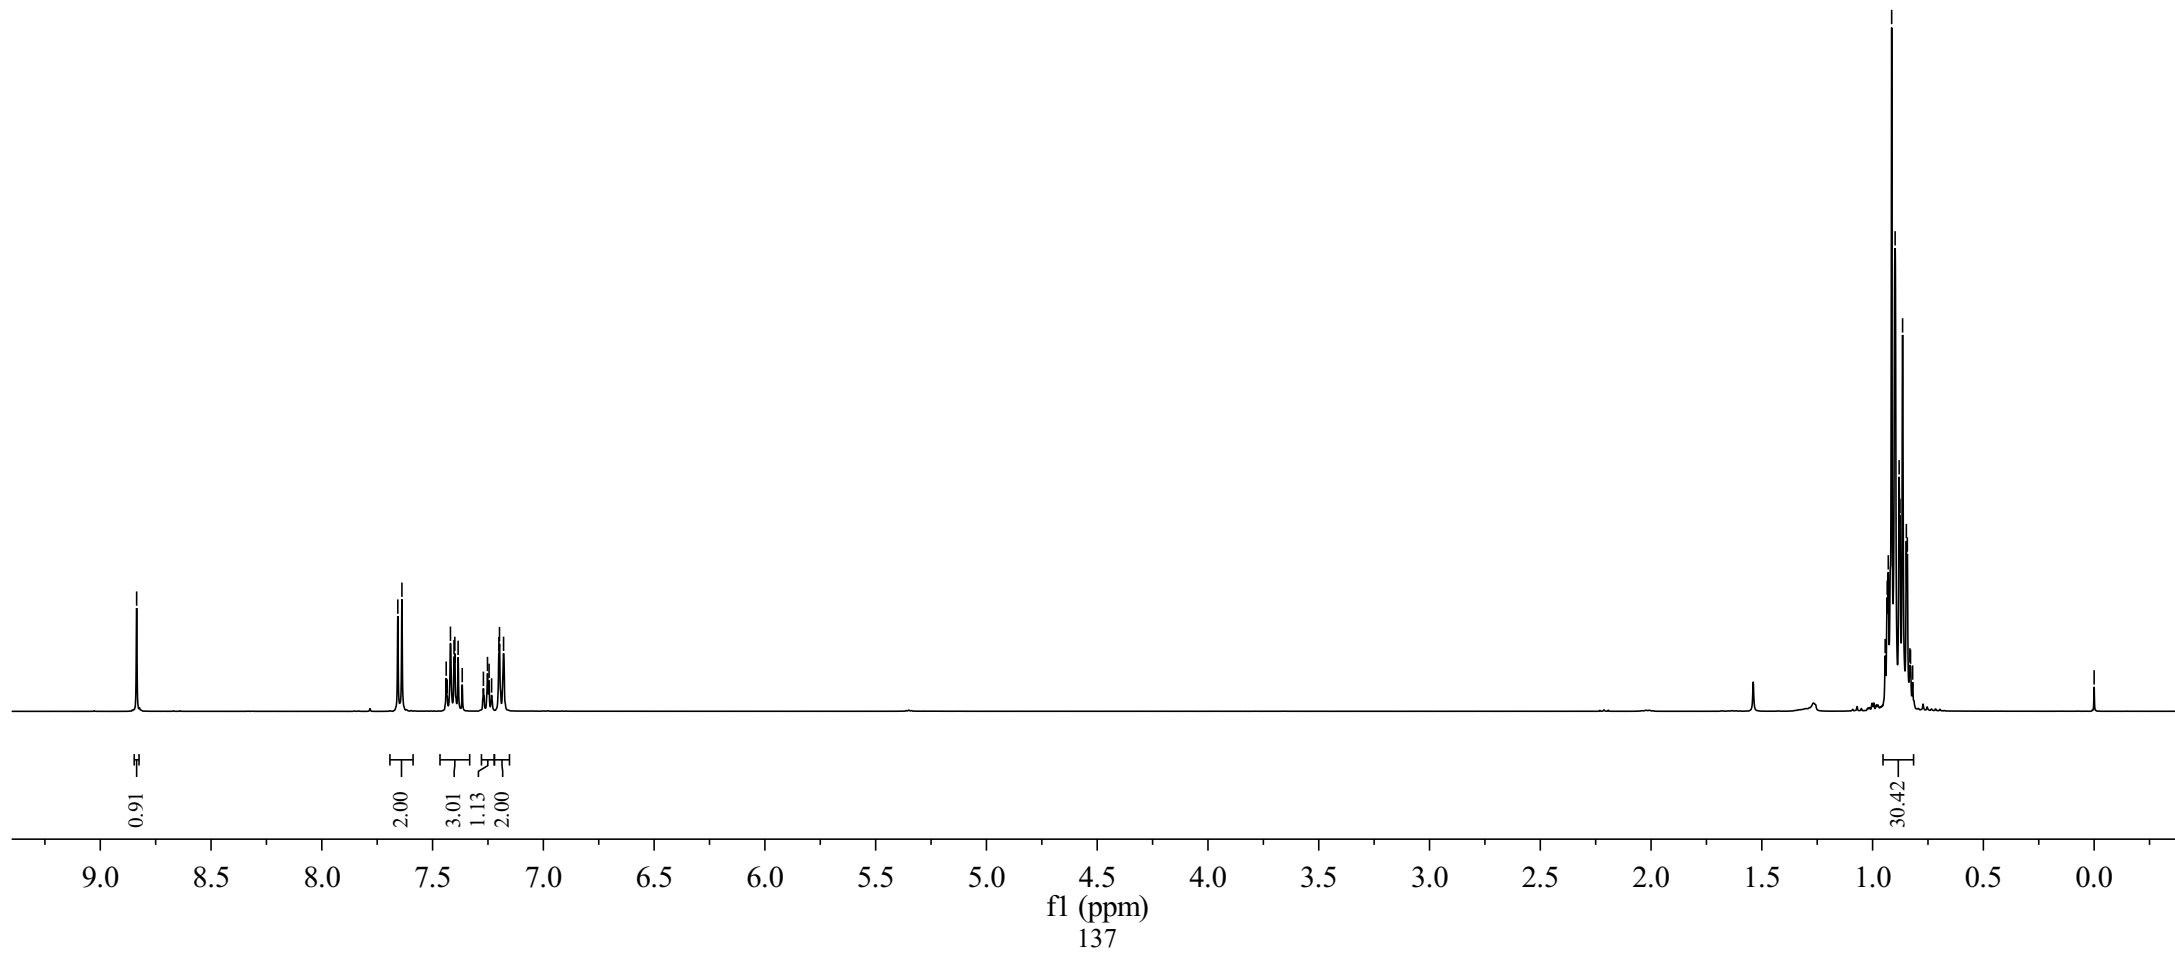

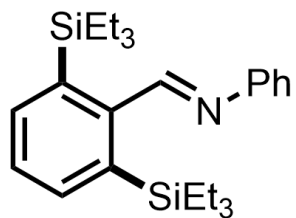

**2s**

**<sup>13</sup>C NMR spectrum (100 MHz, CDCl<sub>3</sub>)**

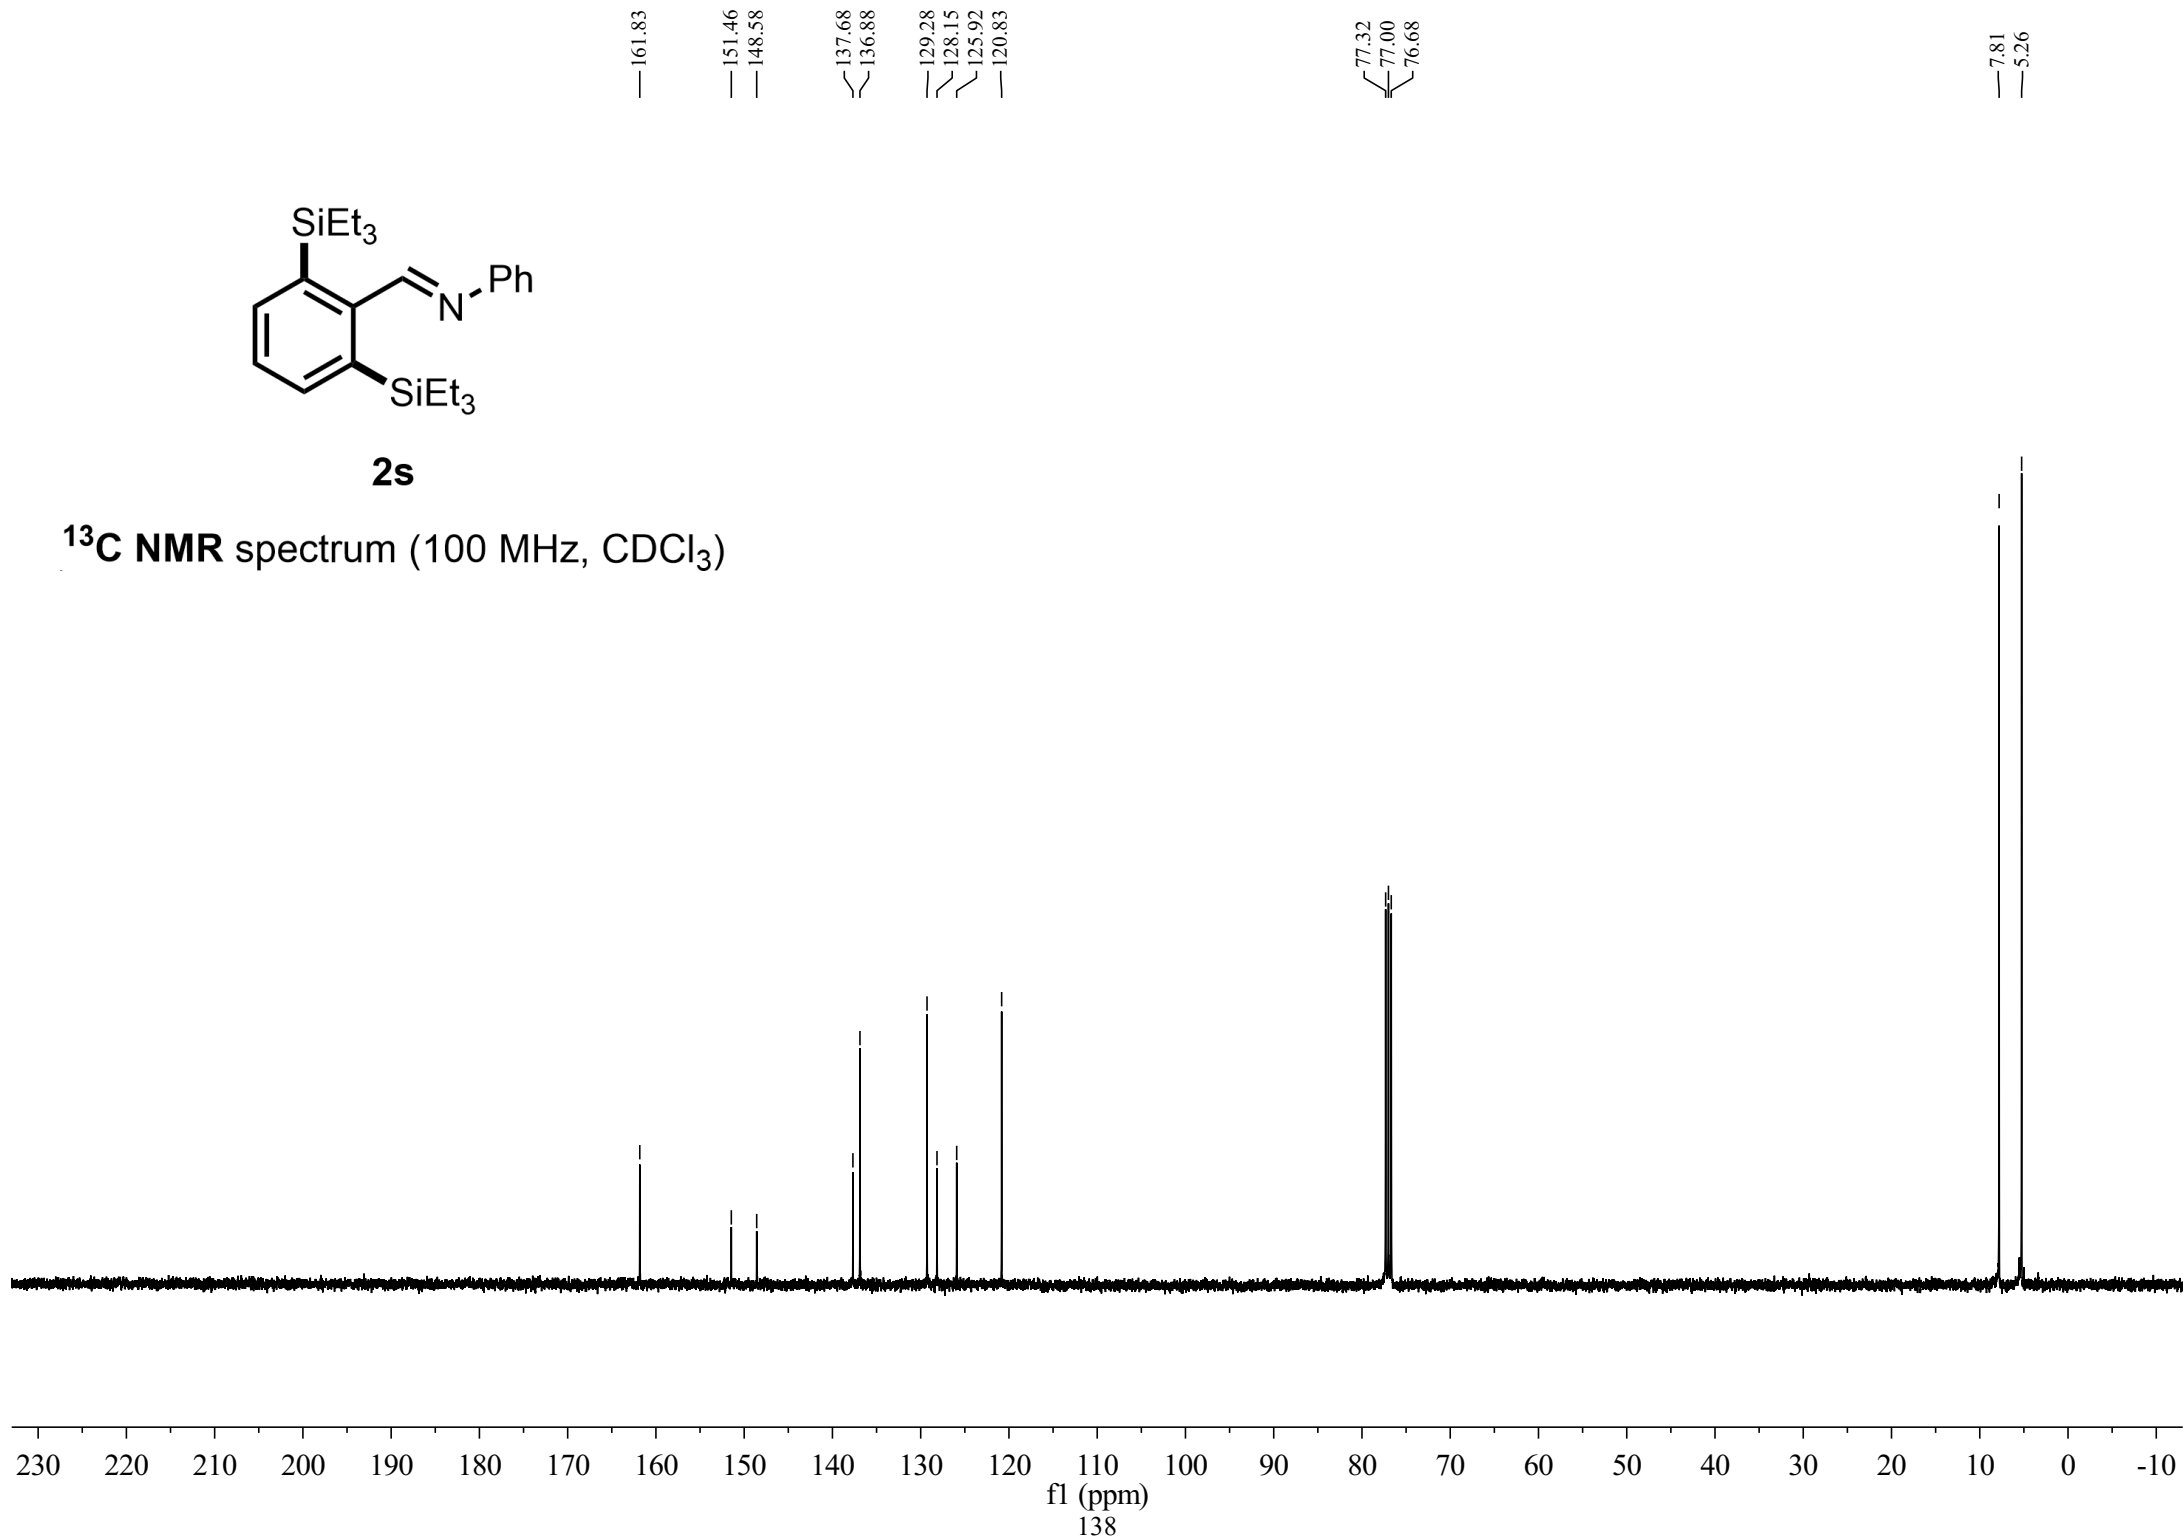

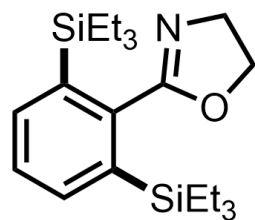

**2t**

<sup>1</sup>H NMR spectrum (400 MHz, CDCl<sub>3</sub>)

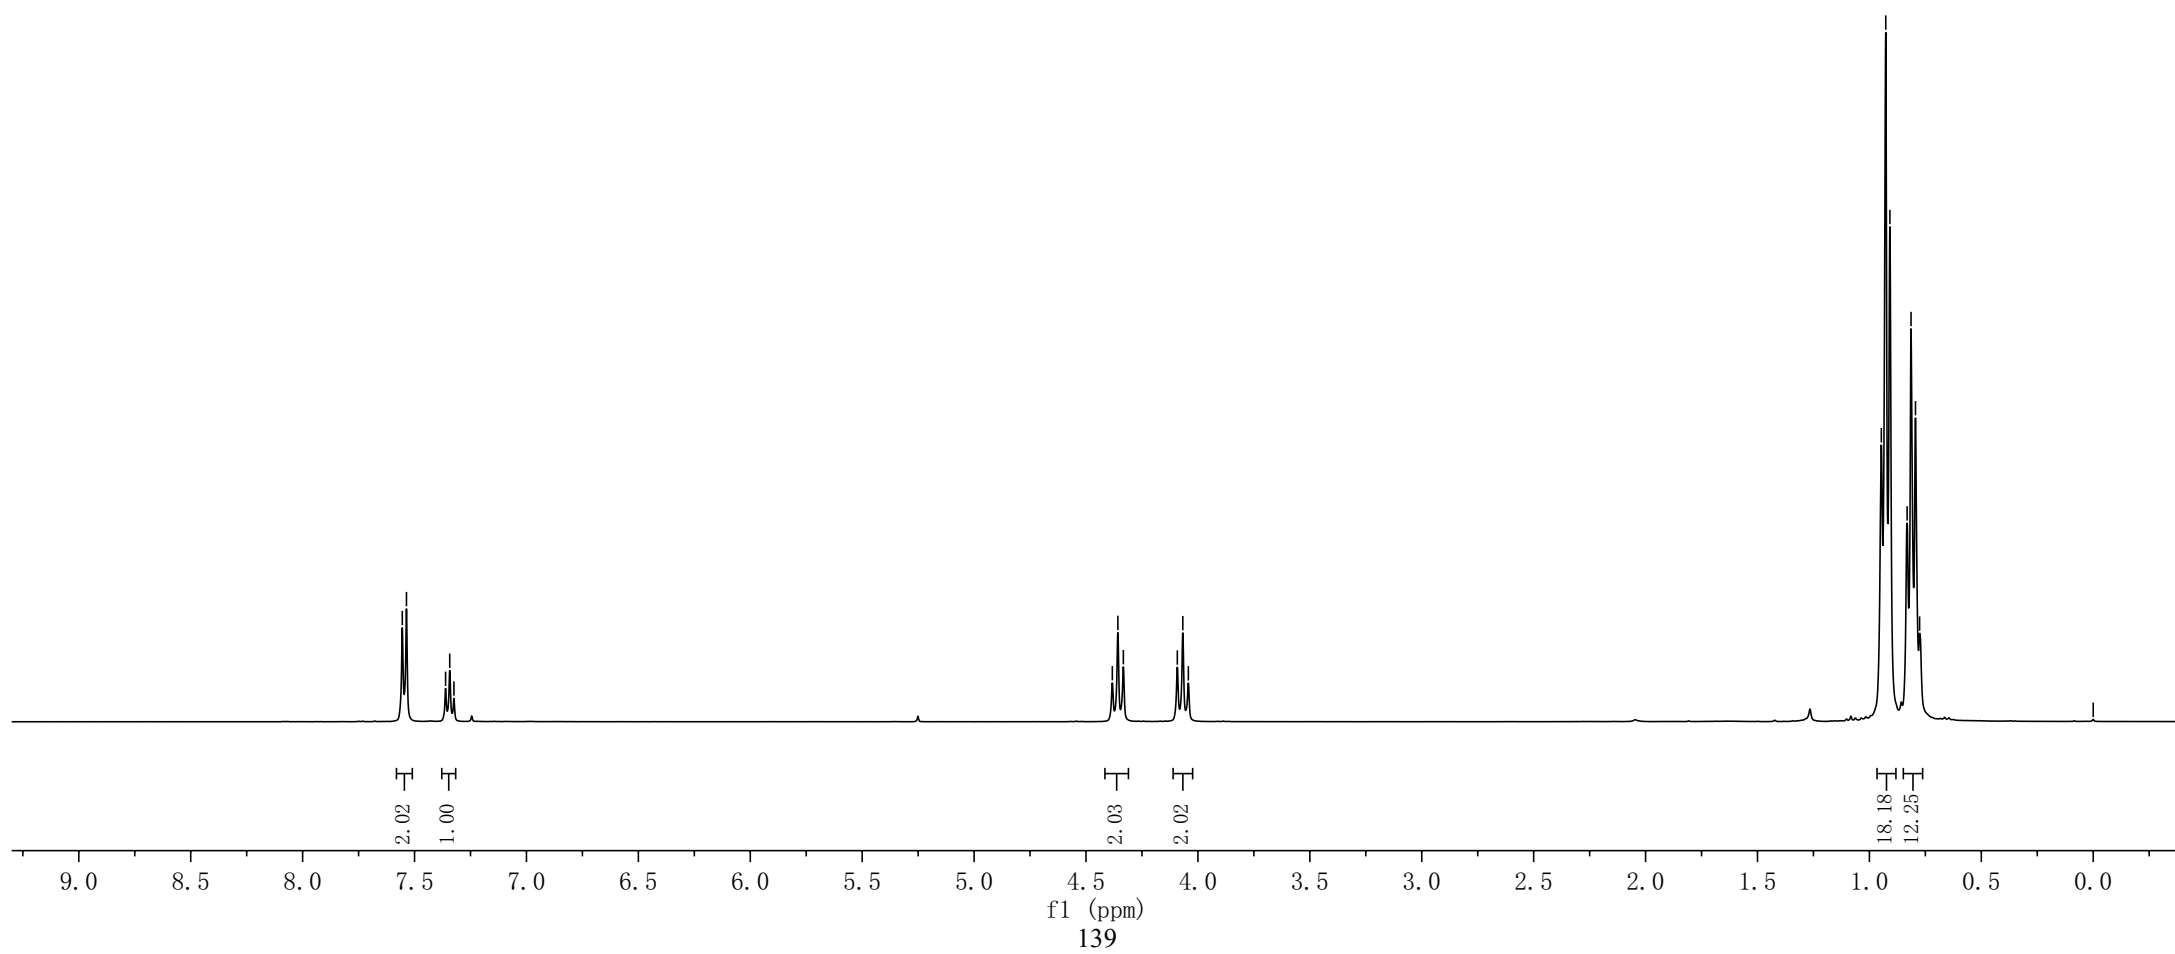

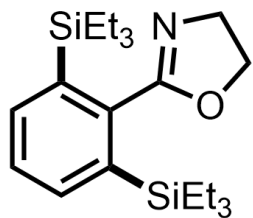

**2t**

<sup>13</sup>C NMR spectrum (100 MHz, CDCl<sub>3</sub>)

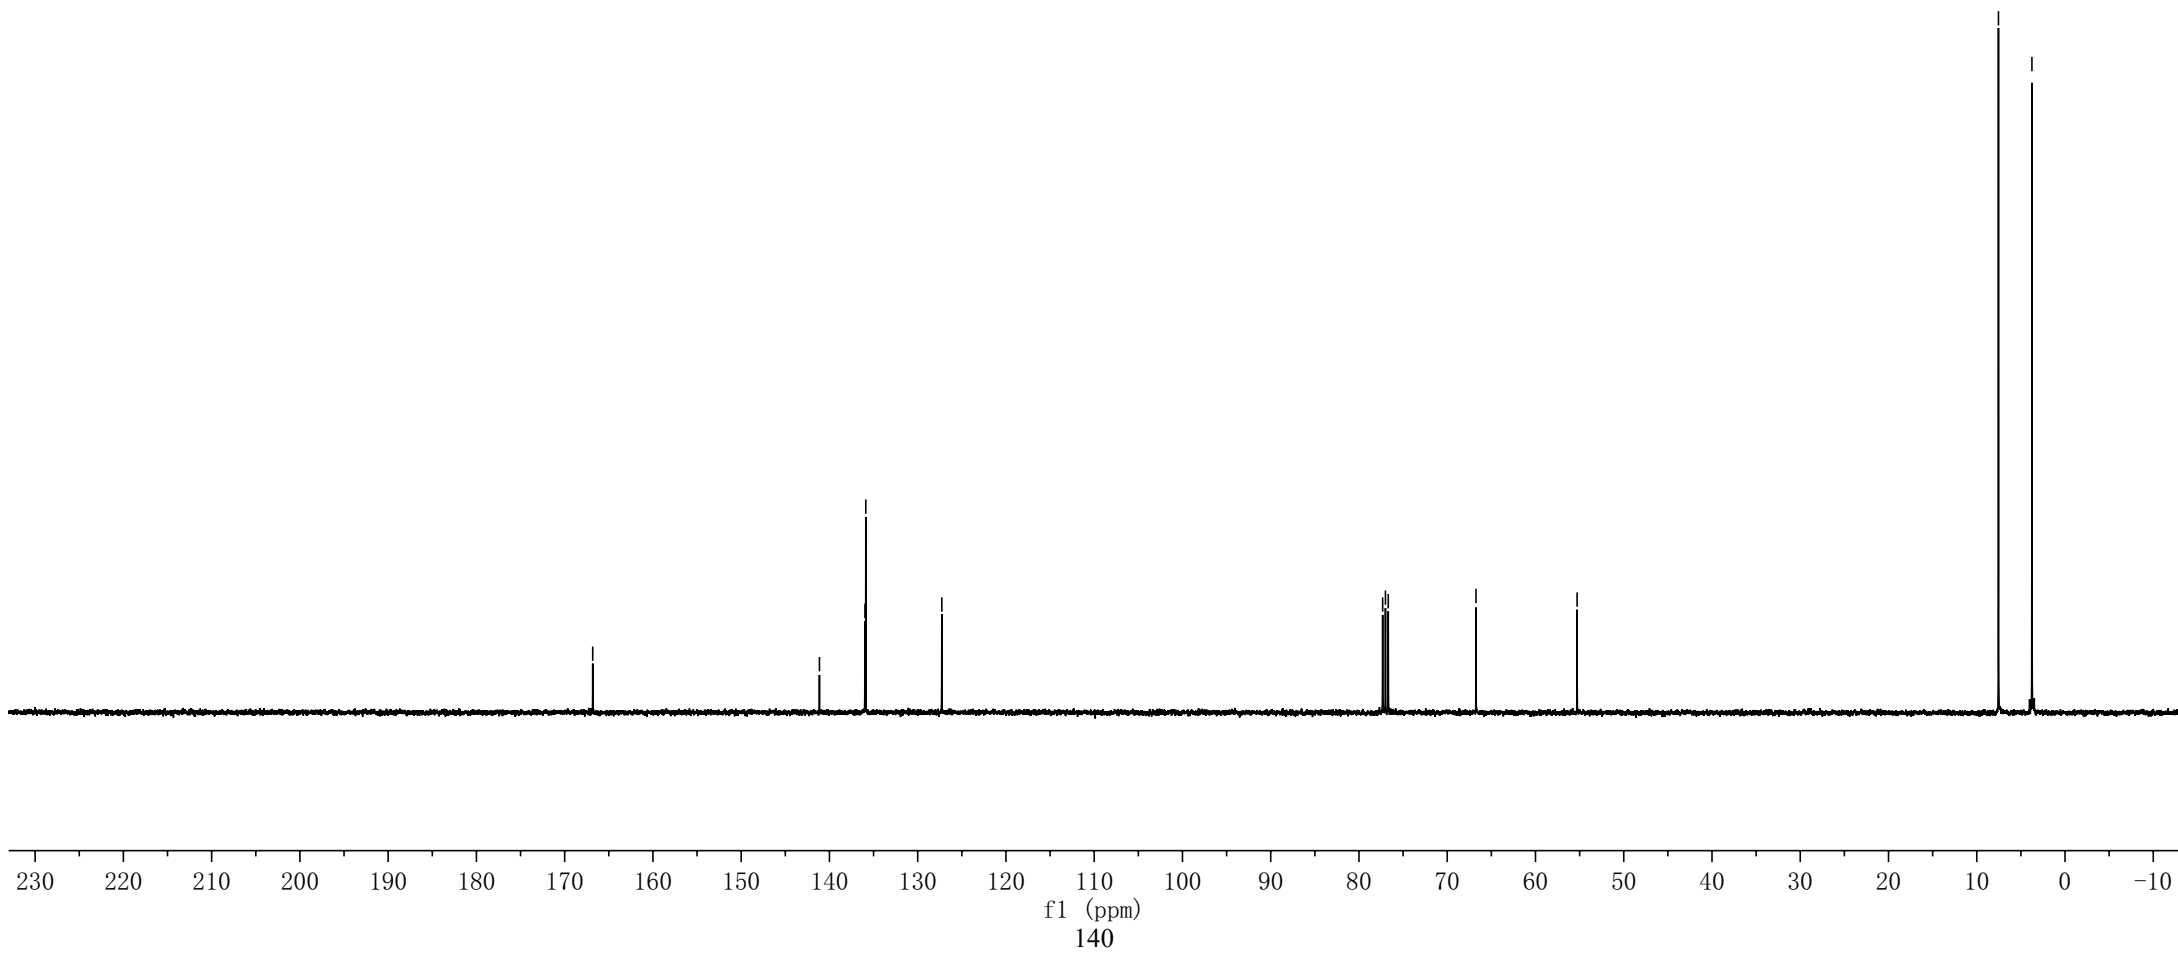

8.89  
8.89  
8.88  
8.88  
8.10  
8.10  
8.08  
8.08  
7.55  
7.54  
7.53  
7.53  
7.43  
7.41  
7.40  
7.38  
7.37  
7.36  
7.35  
7.34  
7.26

—2.85

0.89  
0.87  
0.85  
0.51  
0.49  
0.47  
0.45

—0.01

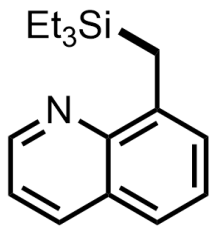

**2u**

**<sup>1</sup>H NMR spectrum (400 MHz, CDCl<sub>3</sub>)**

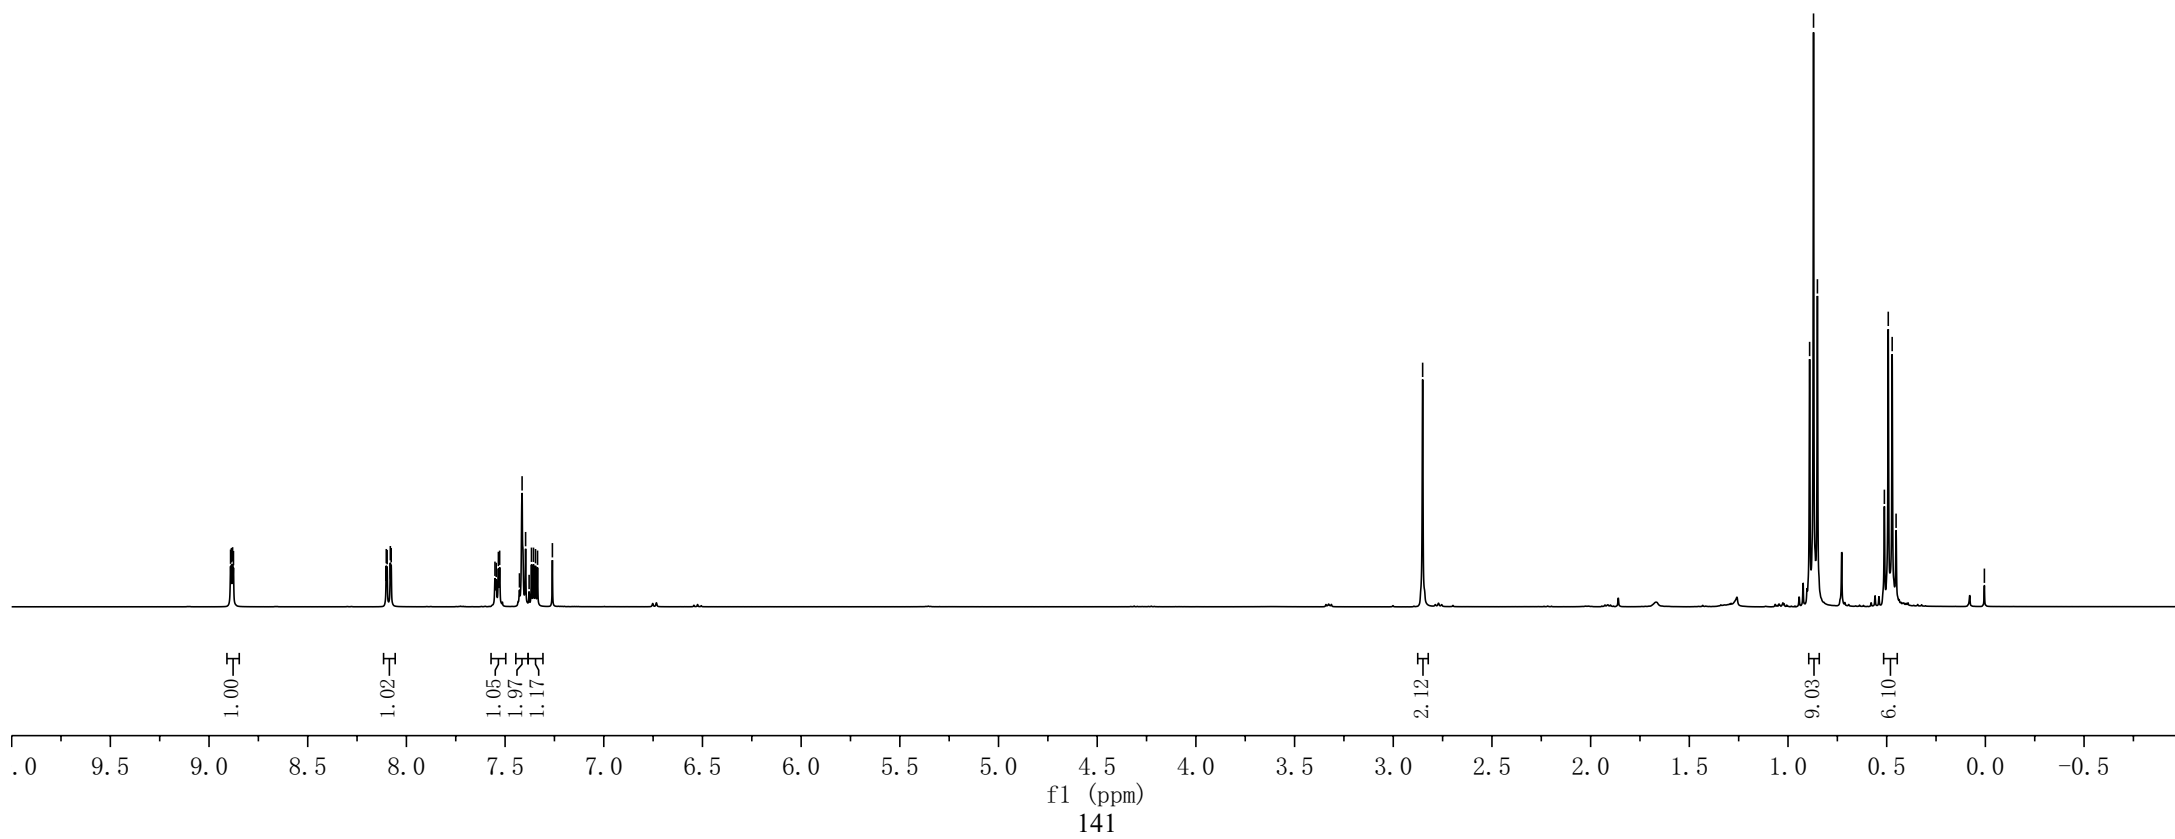

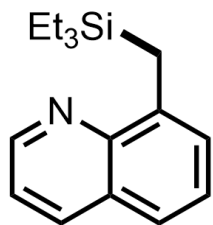

**2u**

148.51  
146.57  
140.80  
136.06  
128.38  
127.77  
126.16  
123.74  
120.66

77.32  
77.00  
76.68

16.88  
7.31  
3.46

**<sup>13</sup>C NMR spectrum (100 MHz, CDCl<sub>3</sub>)**

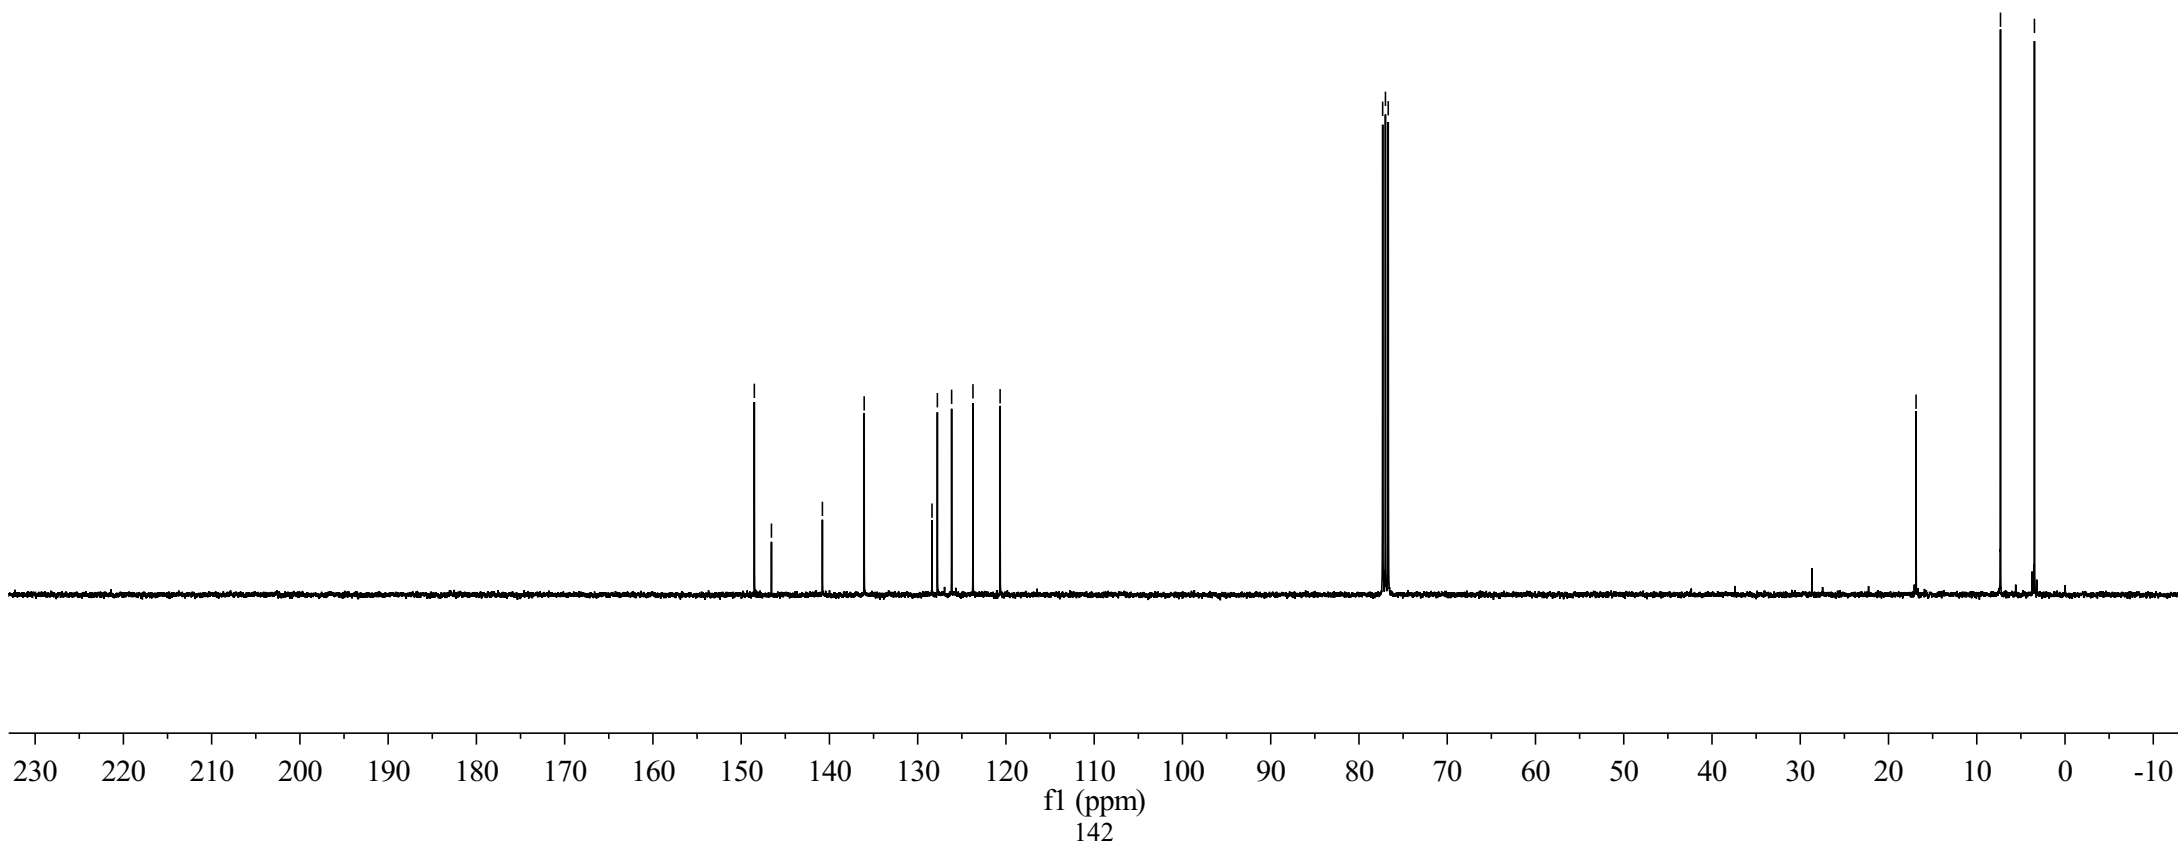

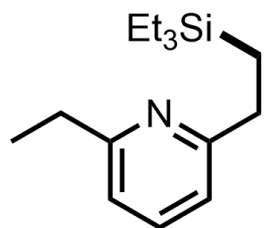

**2v**

**<sup>1</sup>H NMR spectrum (400 MHz, CDCl<sub>3</sub>)**

7.53  
7.51  
7.49  
7.26  
7.01  
7.00  
6.96  
6.95

2.82  
2.80  
2.79  
2.78  
2.77  
2.76  
2.76

1.31  
1.29  
1.27  
0.97  
0.95  
0.93  
0.58  
0.56  
0.55  
0.54  
0.52

-0.00

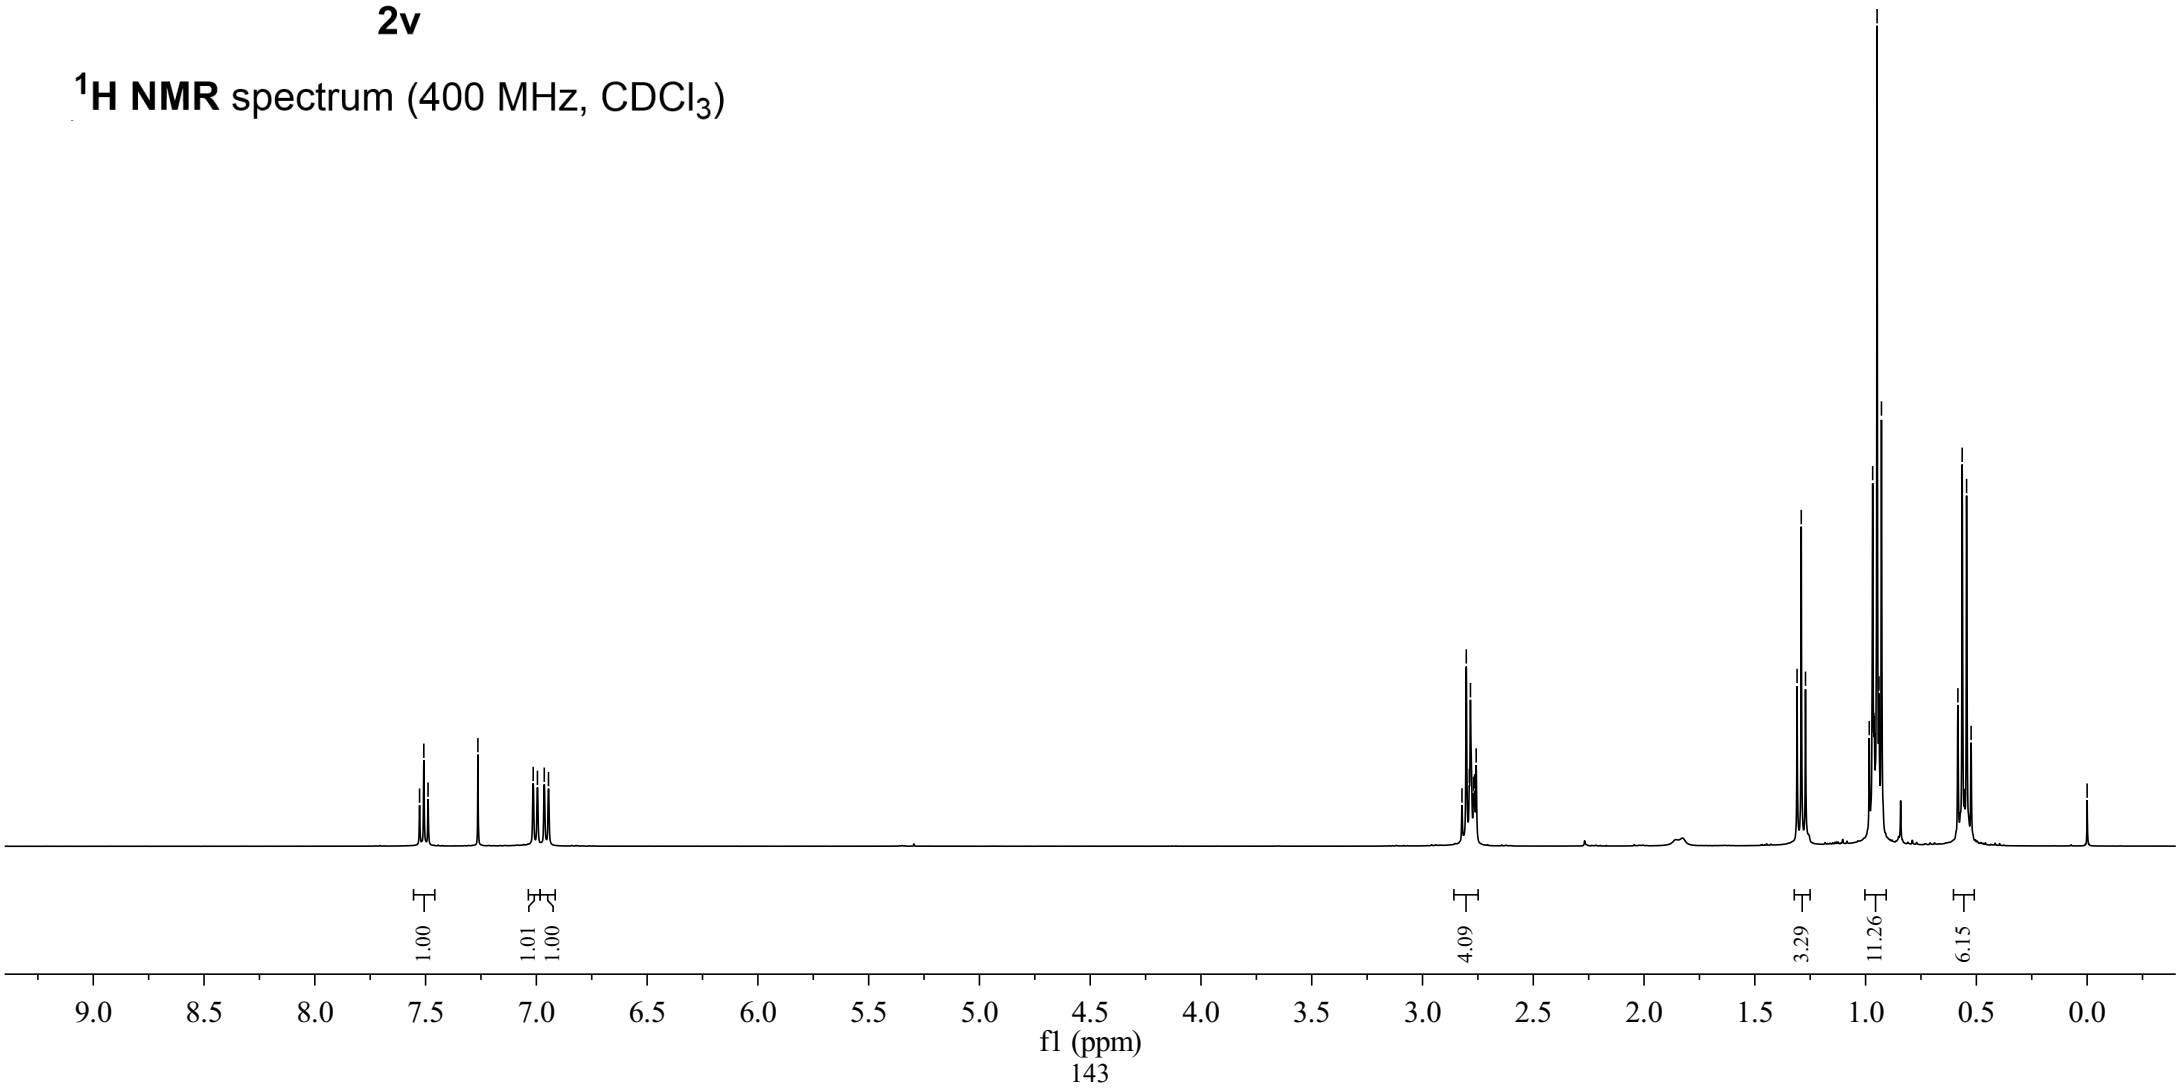

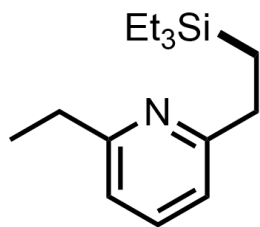

2v

<sup>13</sup>C NMR spectrum (100 MHz, CDCl<sub>3</sub>)

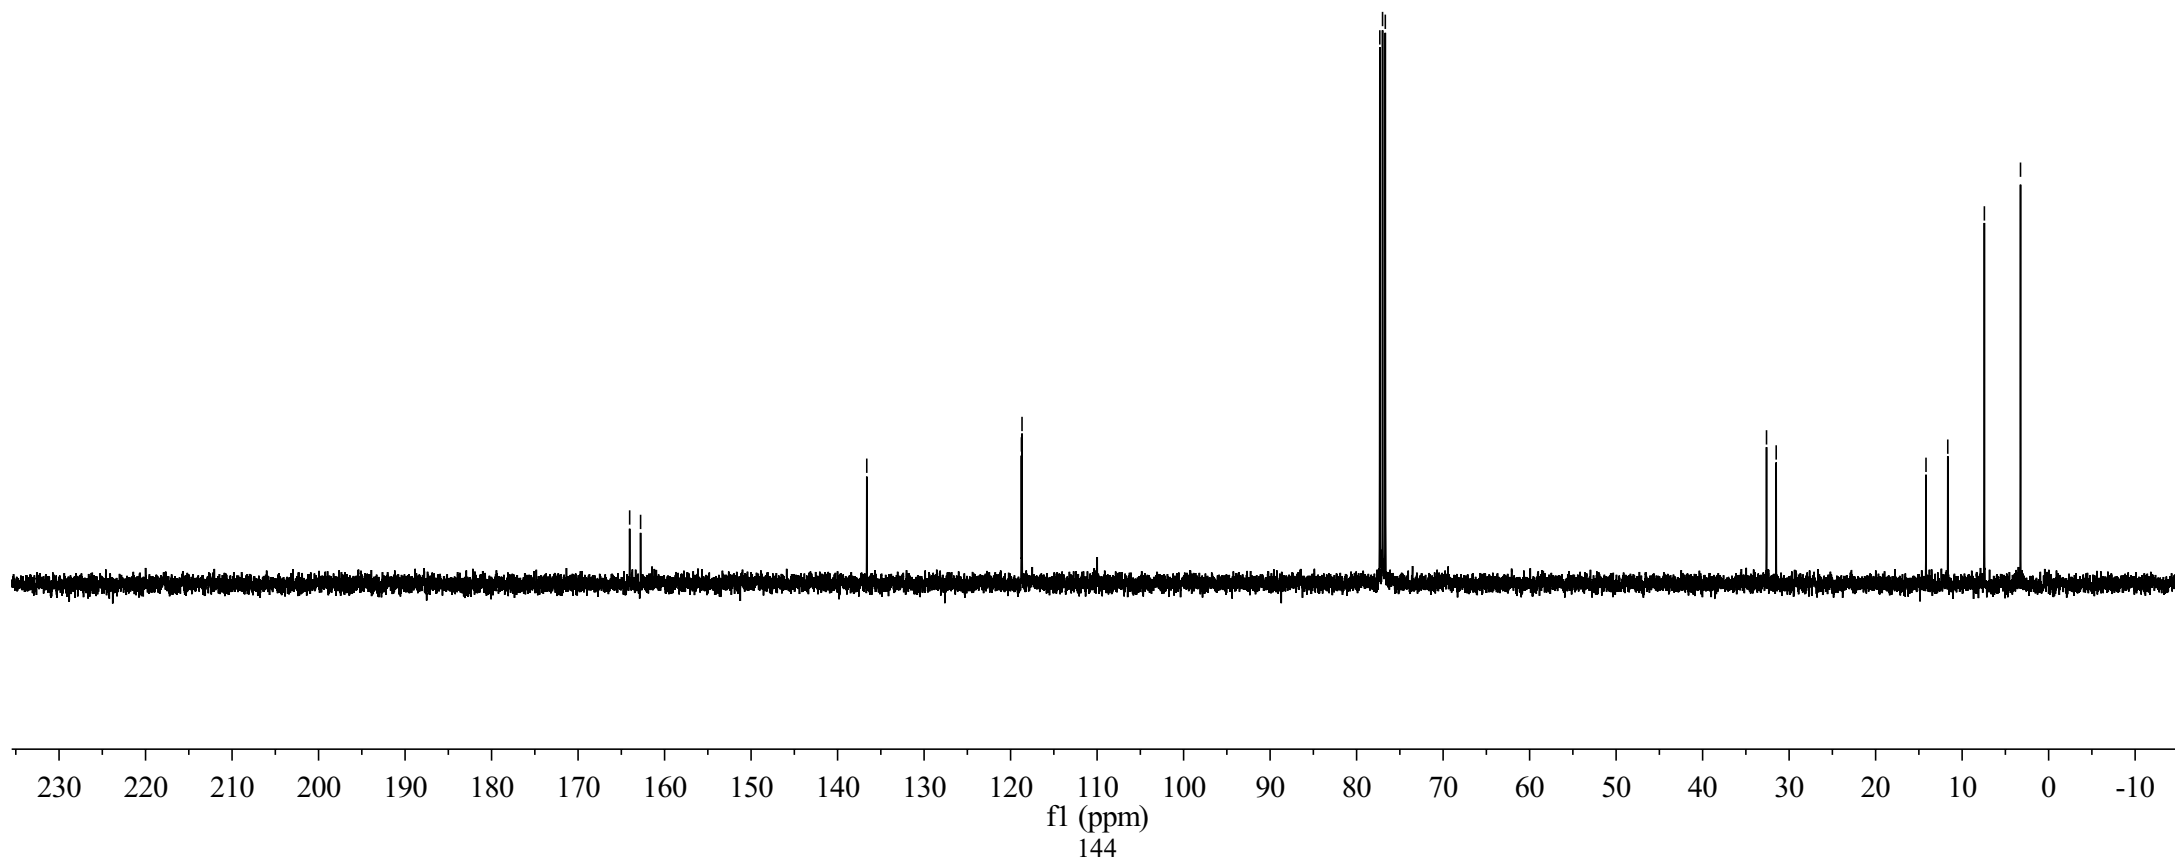



8.12  
8.11

7.40  
7.39  
7.37  
7.36

6.44  
6.42

3.13  
3.04

0.97  
0.95  
0.93  
0.62  
0.60  
0.58  
0.56

0.00

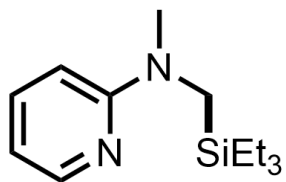

**2w**

**<sup>1</sup>H NMR spectrum (400 MHz, CDCl<sub>3</sub>)**

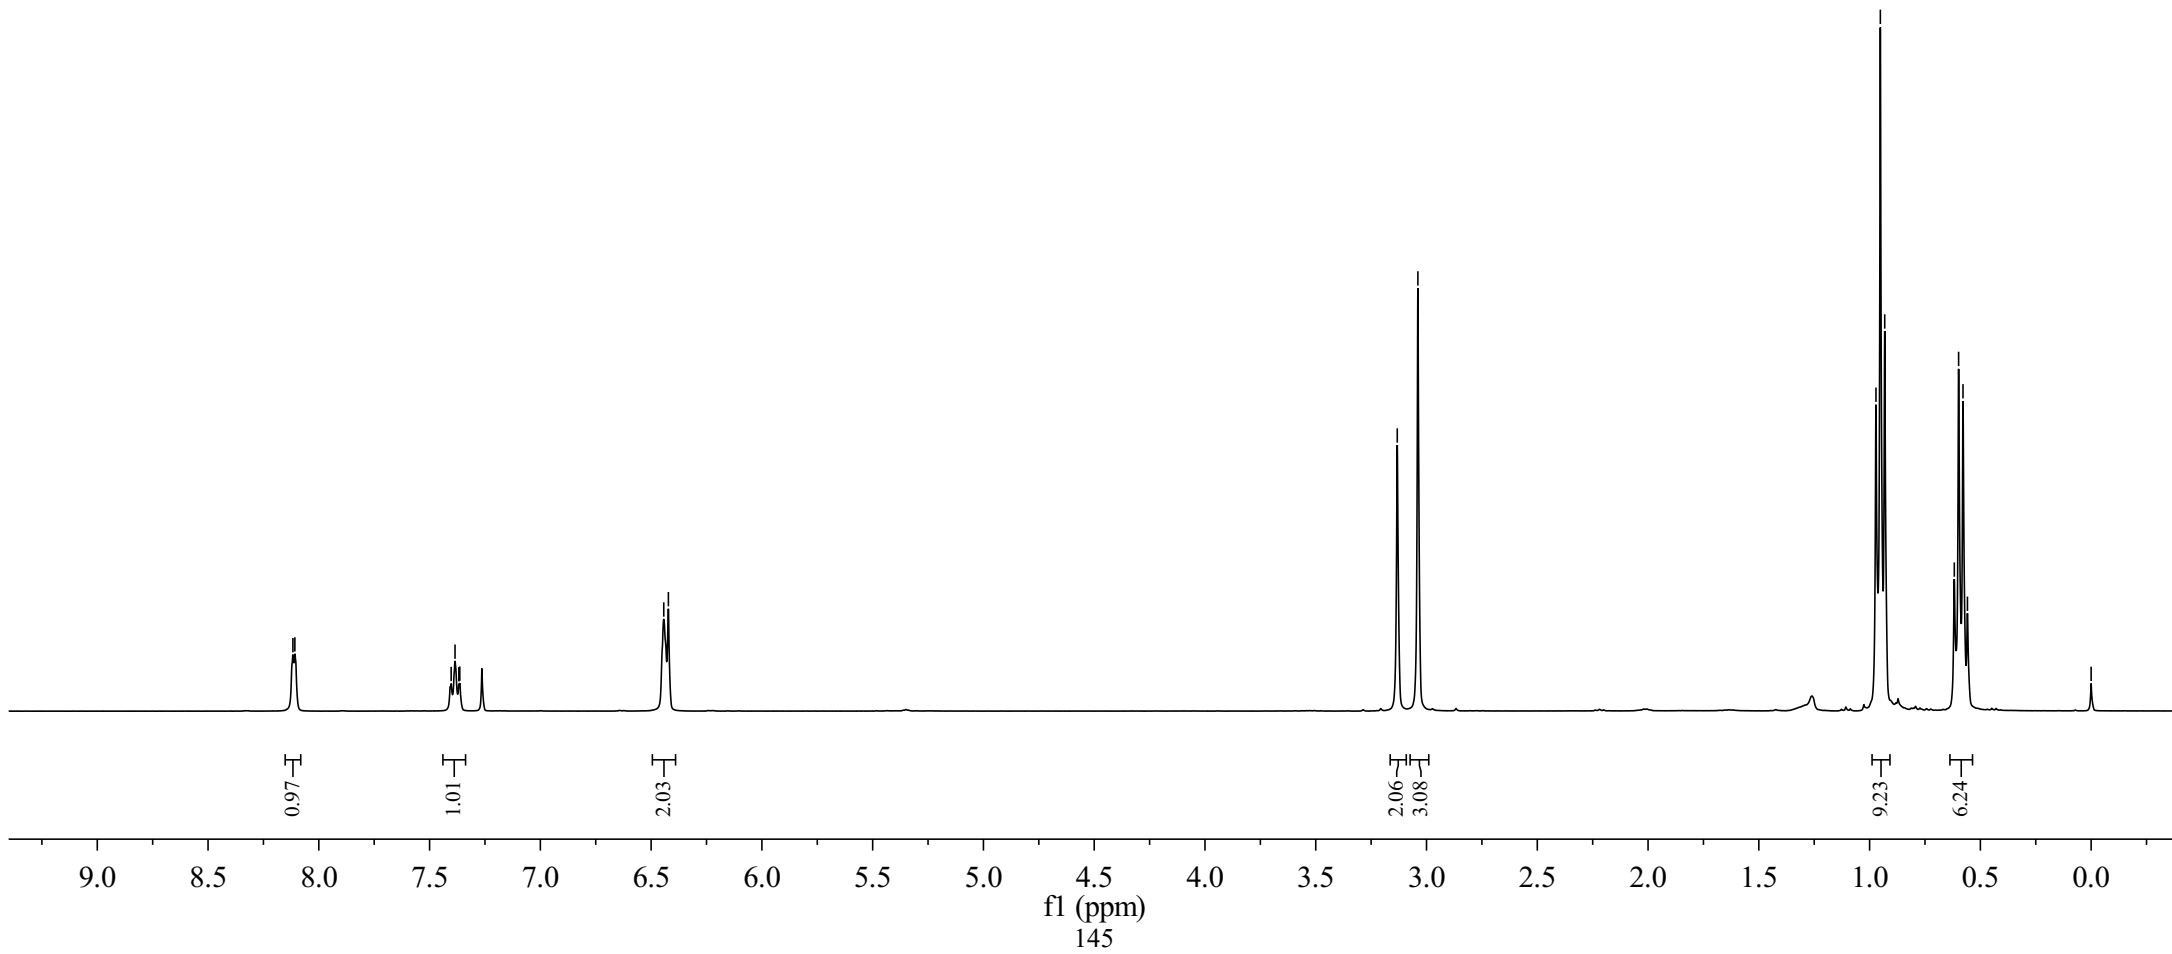

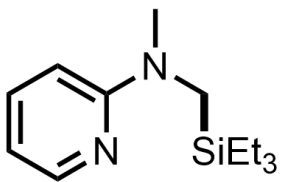

**2w**

**<sup>13</sup>C NMR spectrum (100 MHz, CDCl<sub>3</sub>)**

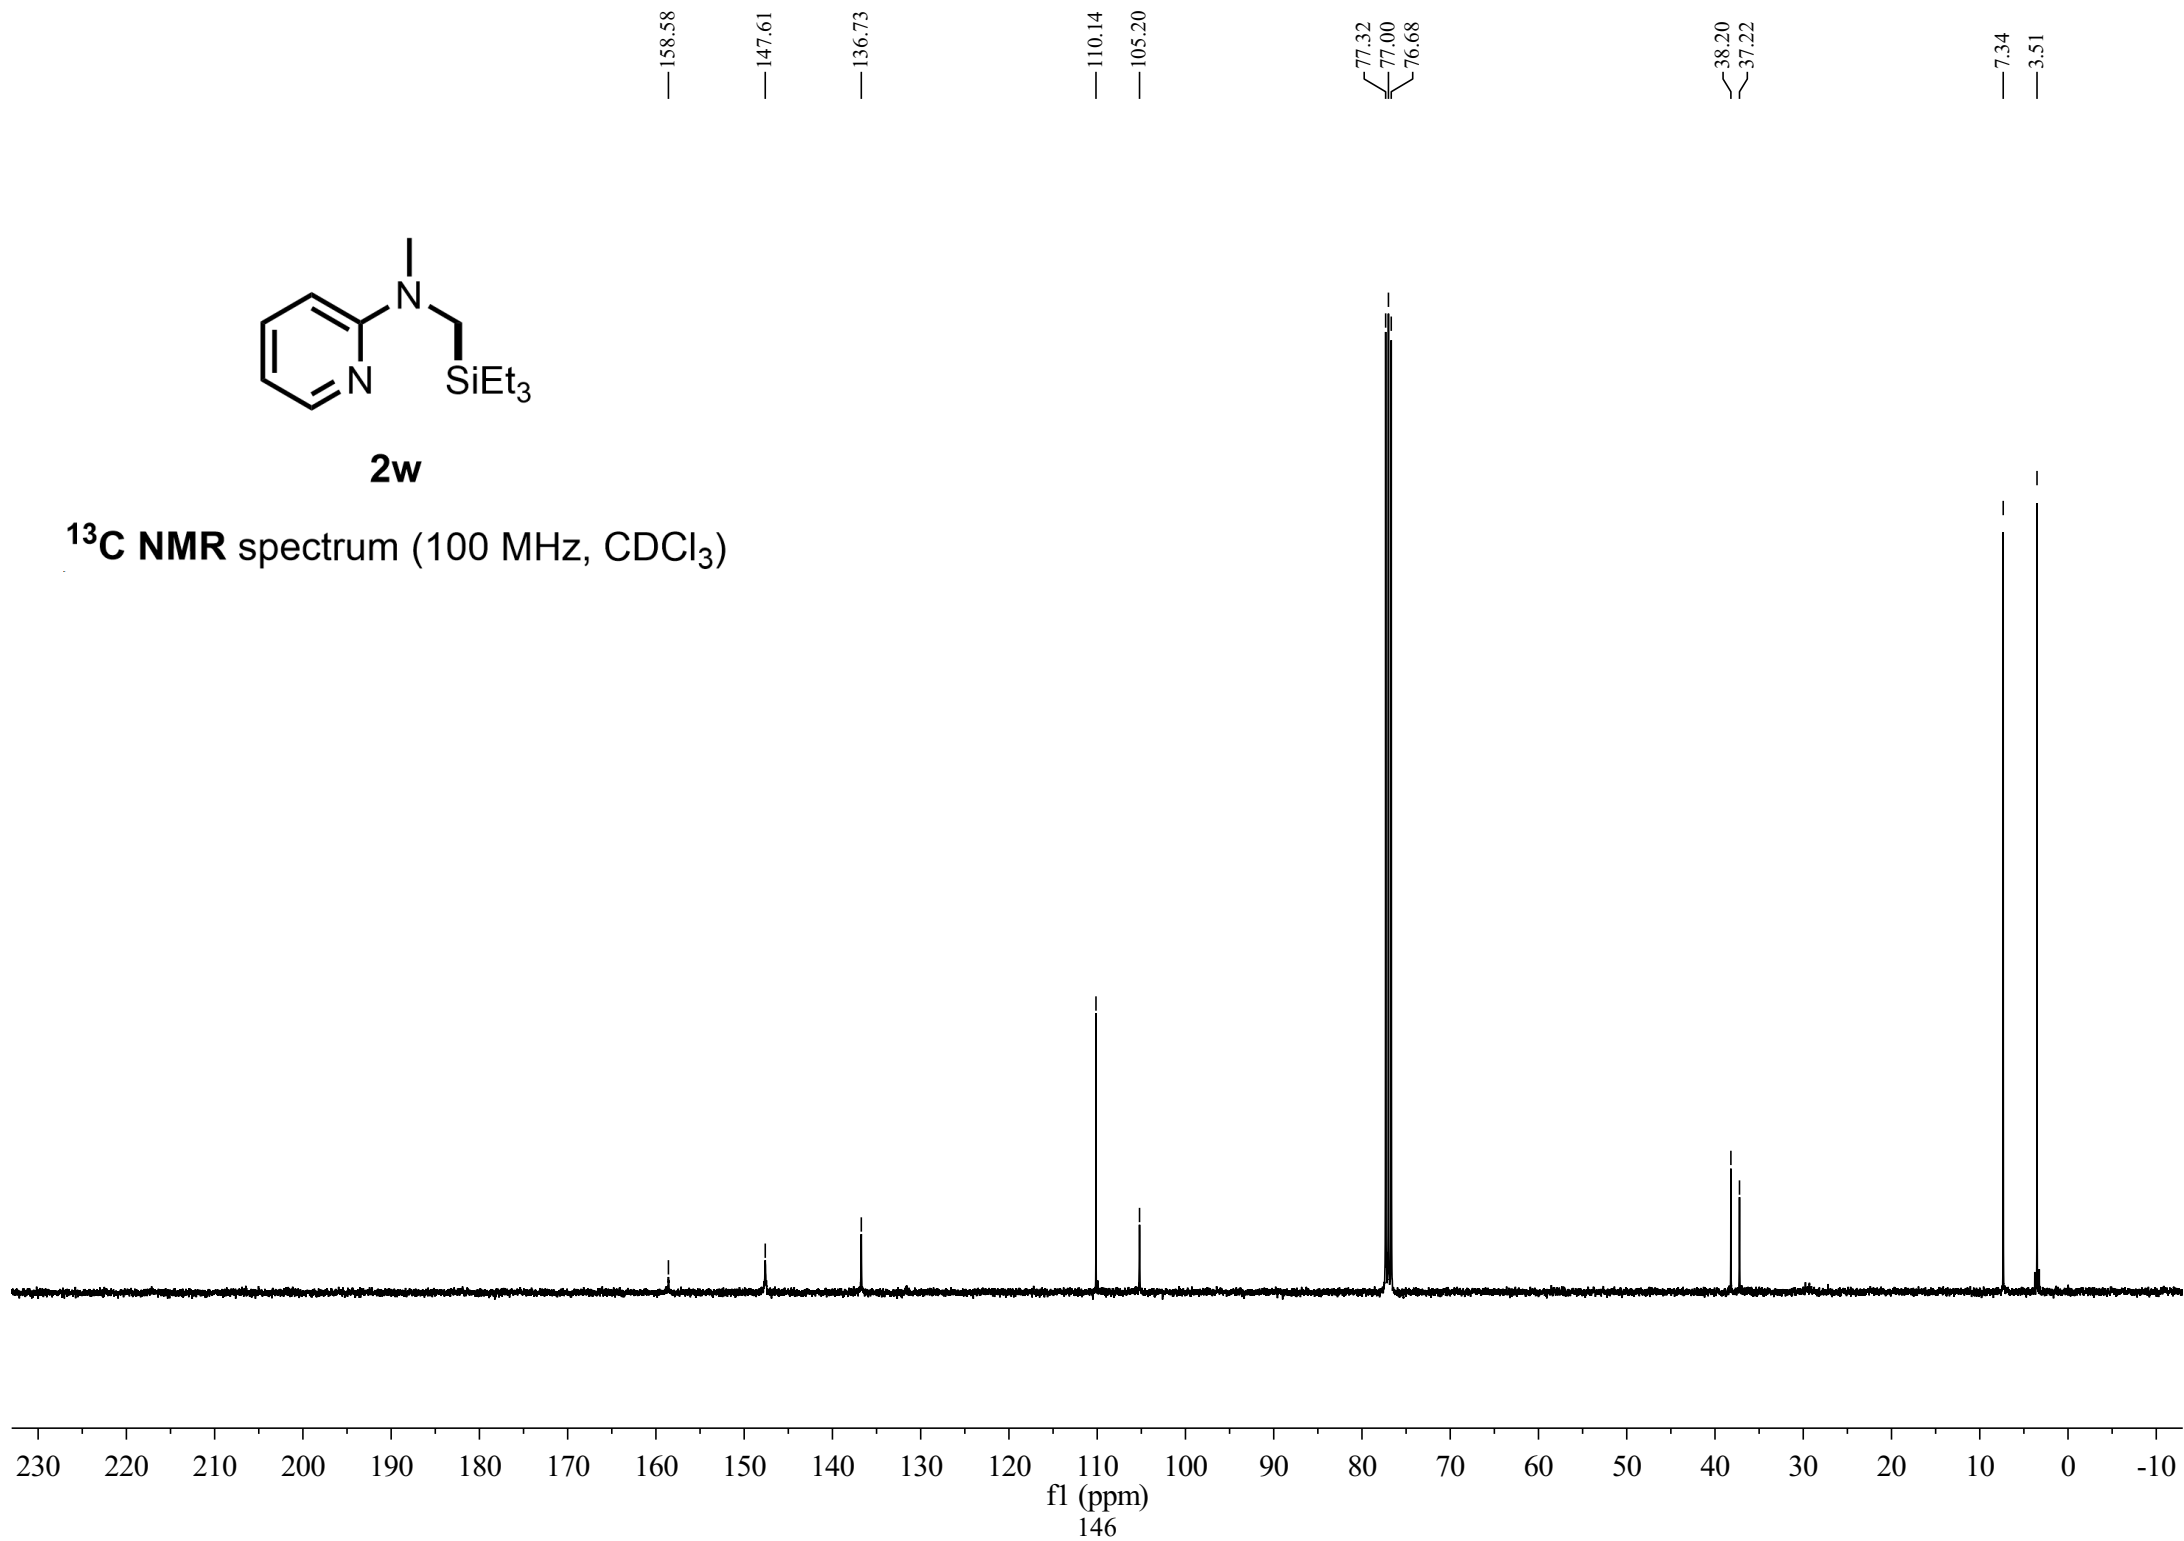

7.94  
7.94  
7.92  
7.92  
7.65  
7.64  
7.64  
7.64  
7.63  
7.63  
7.63  
7.57  
7.56  
7.55  
7.54  
7.53  
7.52  
7.47  
7.46  
7.46  
7.45  
7.45  
7.44  
7.44  
7.43  
7.41  
7.41  
7.34  
7.34  
7.32  
7.32  
7.30  
7.30  
7.27  
7.27  
7.26  
7.25  
7.24  
7.24  
7.23  
7.23  
7.21  
7.21  
7.20  
7.19  
7.18  
7.18  
7.17  
6.75  
6.75  
6.74  
6.74  
6.73  
6.73  
6.72  
6.72

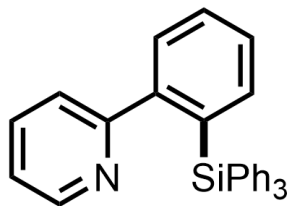

**2x**

<sup>1</sup>H NMR spectrum (400 MHz, CDCl<sub>3</sub>)

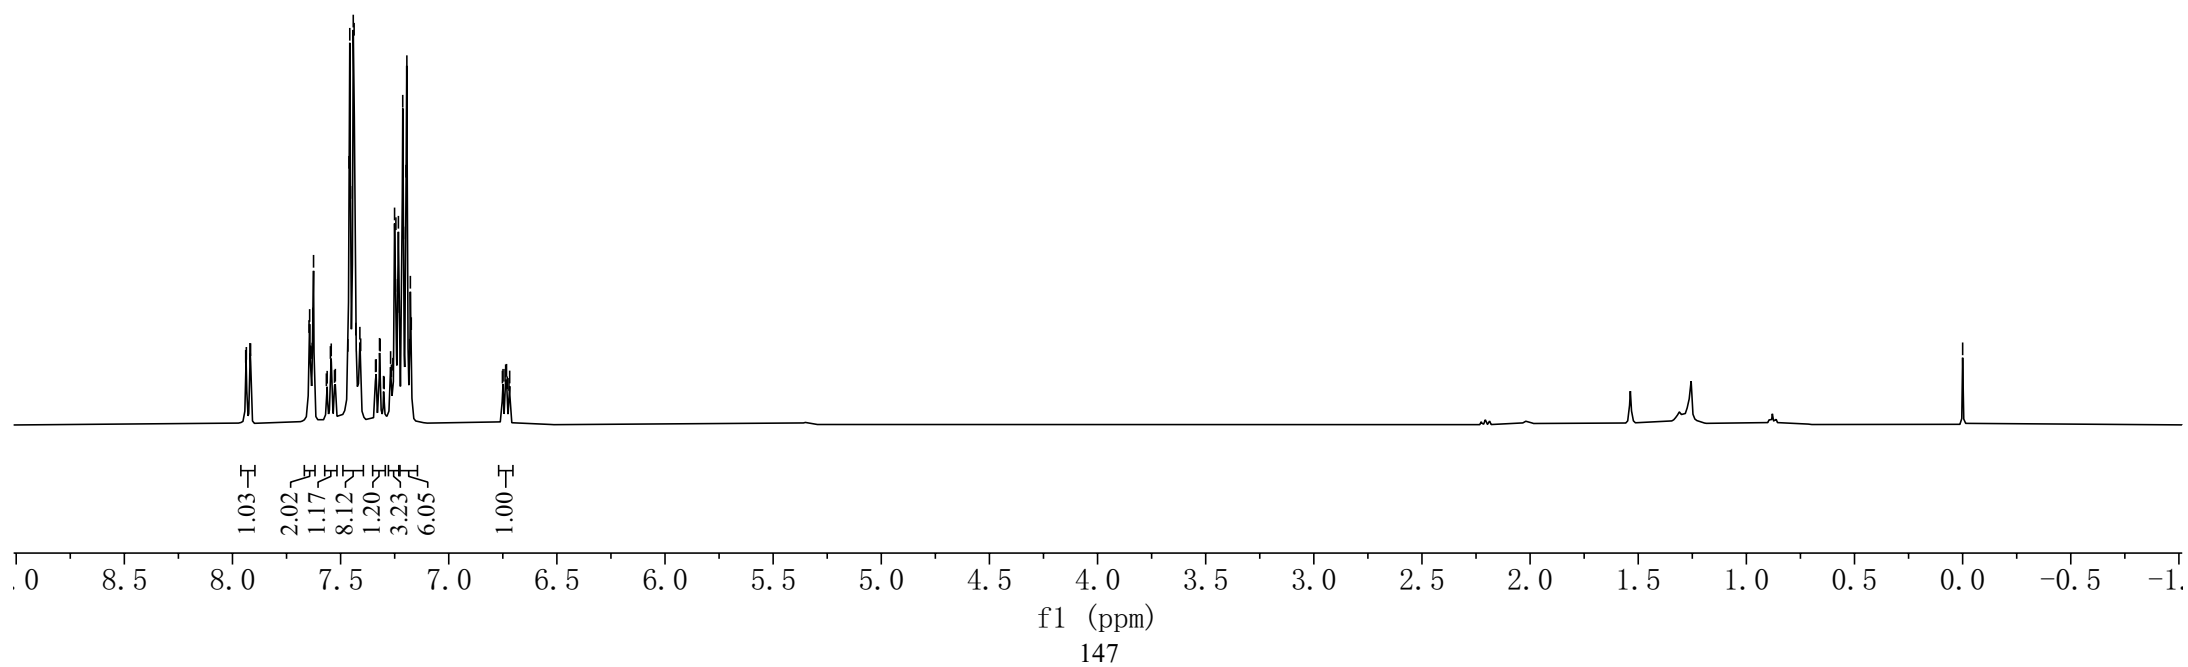

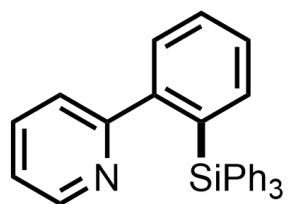

**2x**

**<sup>13</sup>C NMR spectrum (100 MHz, CDCl<sub>3</sub>)**

— 156.02  
146.99  
145.30  
140.47  
139.37  
136.22  
135.55  
133.61  
129.98  
128.33  
127.94  
127.15  
126.50  
121.91  
119.76  
77.32  
77.00  
76.68

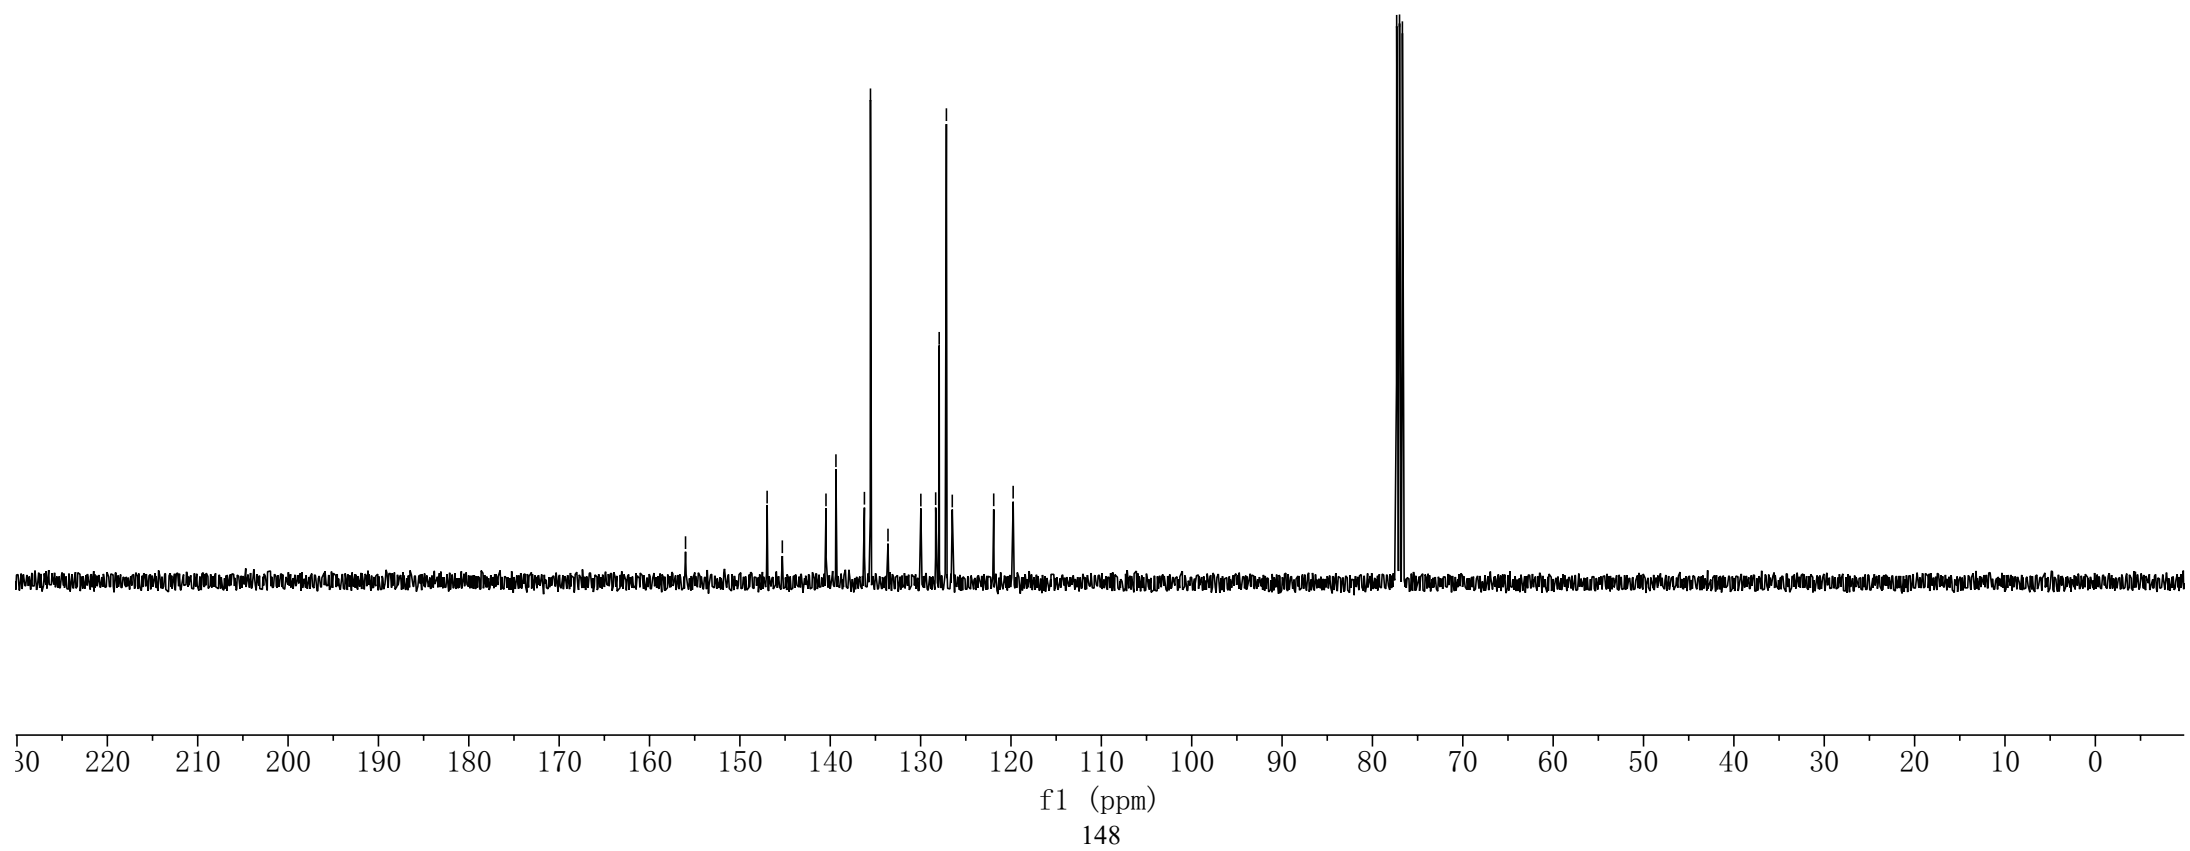

8.20  
8.20  
8.19  
8.19  
8.19  
8.18  
8.18  
8.18  
7.66  
7.66  
7.65  
7.64  
7.64  
7.49  
7.48  
7.47  
7.47  
7.46  
7.46  
7.45  
7.45  
7.45  
7.44  
7.43  
7.42  
7.42  
7.41  
7.41  
7.41  
7.40  
7.40  
7.39  
7.39  
7.38  
7.37  
7.32  
7.31  
7.30  
7.29  
7.28  
7.28  
7.27  
7.27  
7.26  
7.26  
7.25  
7.25  
7.24  
7.24  
7.23  
7.23  
7.22  
7.22  
7.22  
7.21  
7.21  
6.98  
6.98  
6.97  
6.97  
6.96  
6.96  
6.95  
6.95

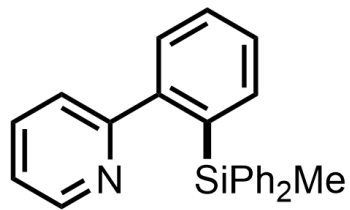

**2y**

**<sup>1</sup>H NMR spectrum (400 MHz, CDCl<sub>3</sub>)**

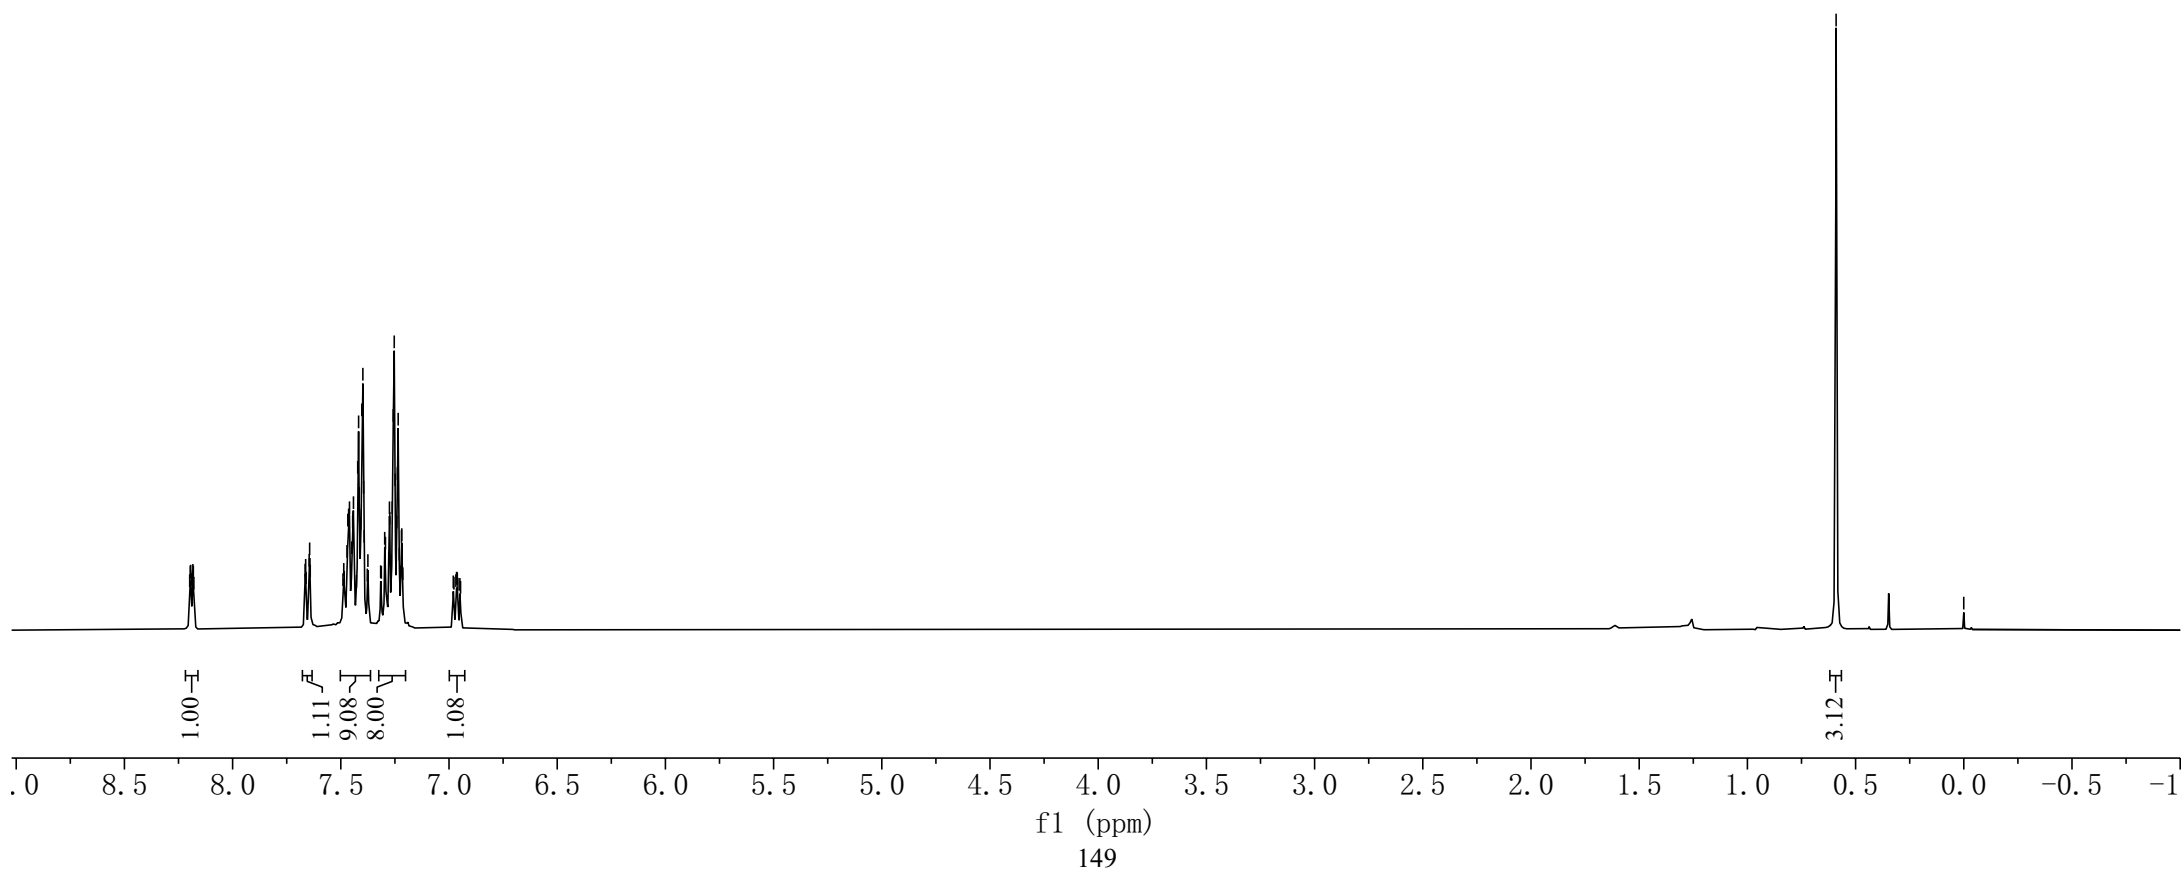

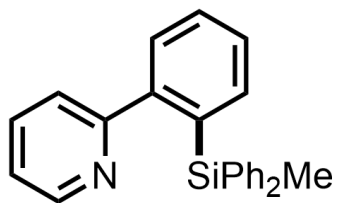

2y

<sup>13</sup>C NMR spectrum (100 MHz, CDCl<sub>3</sub>)

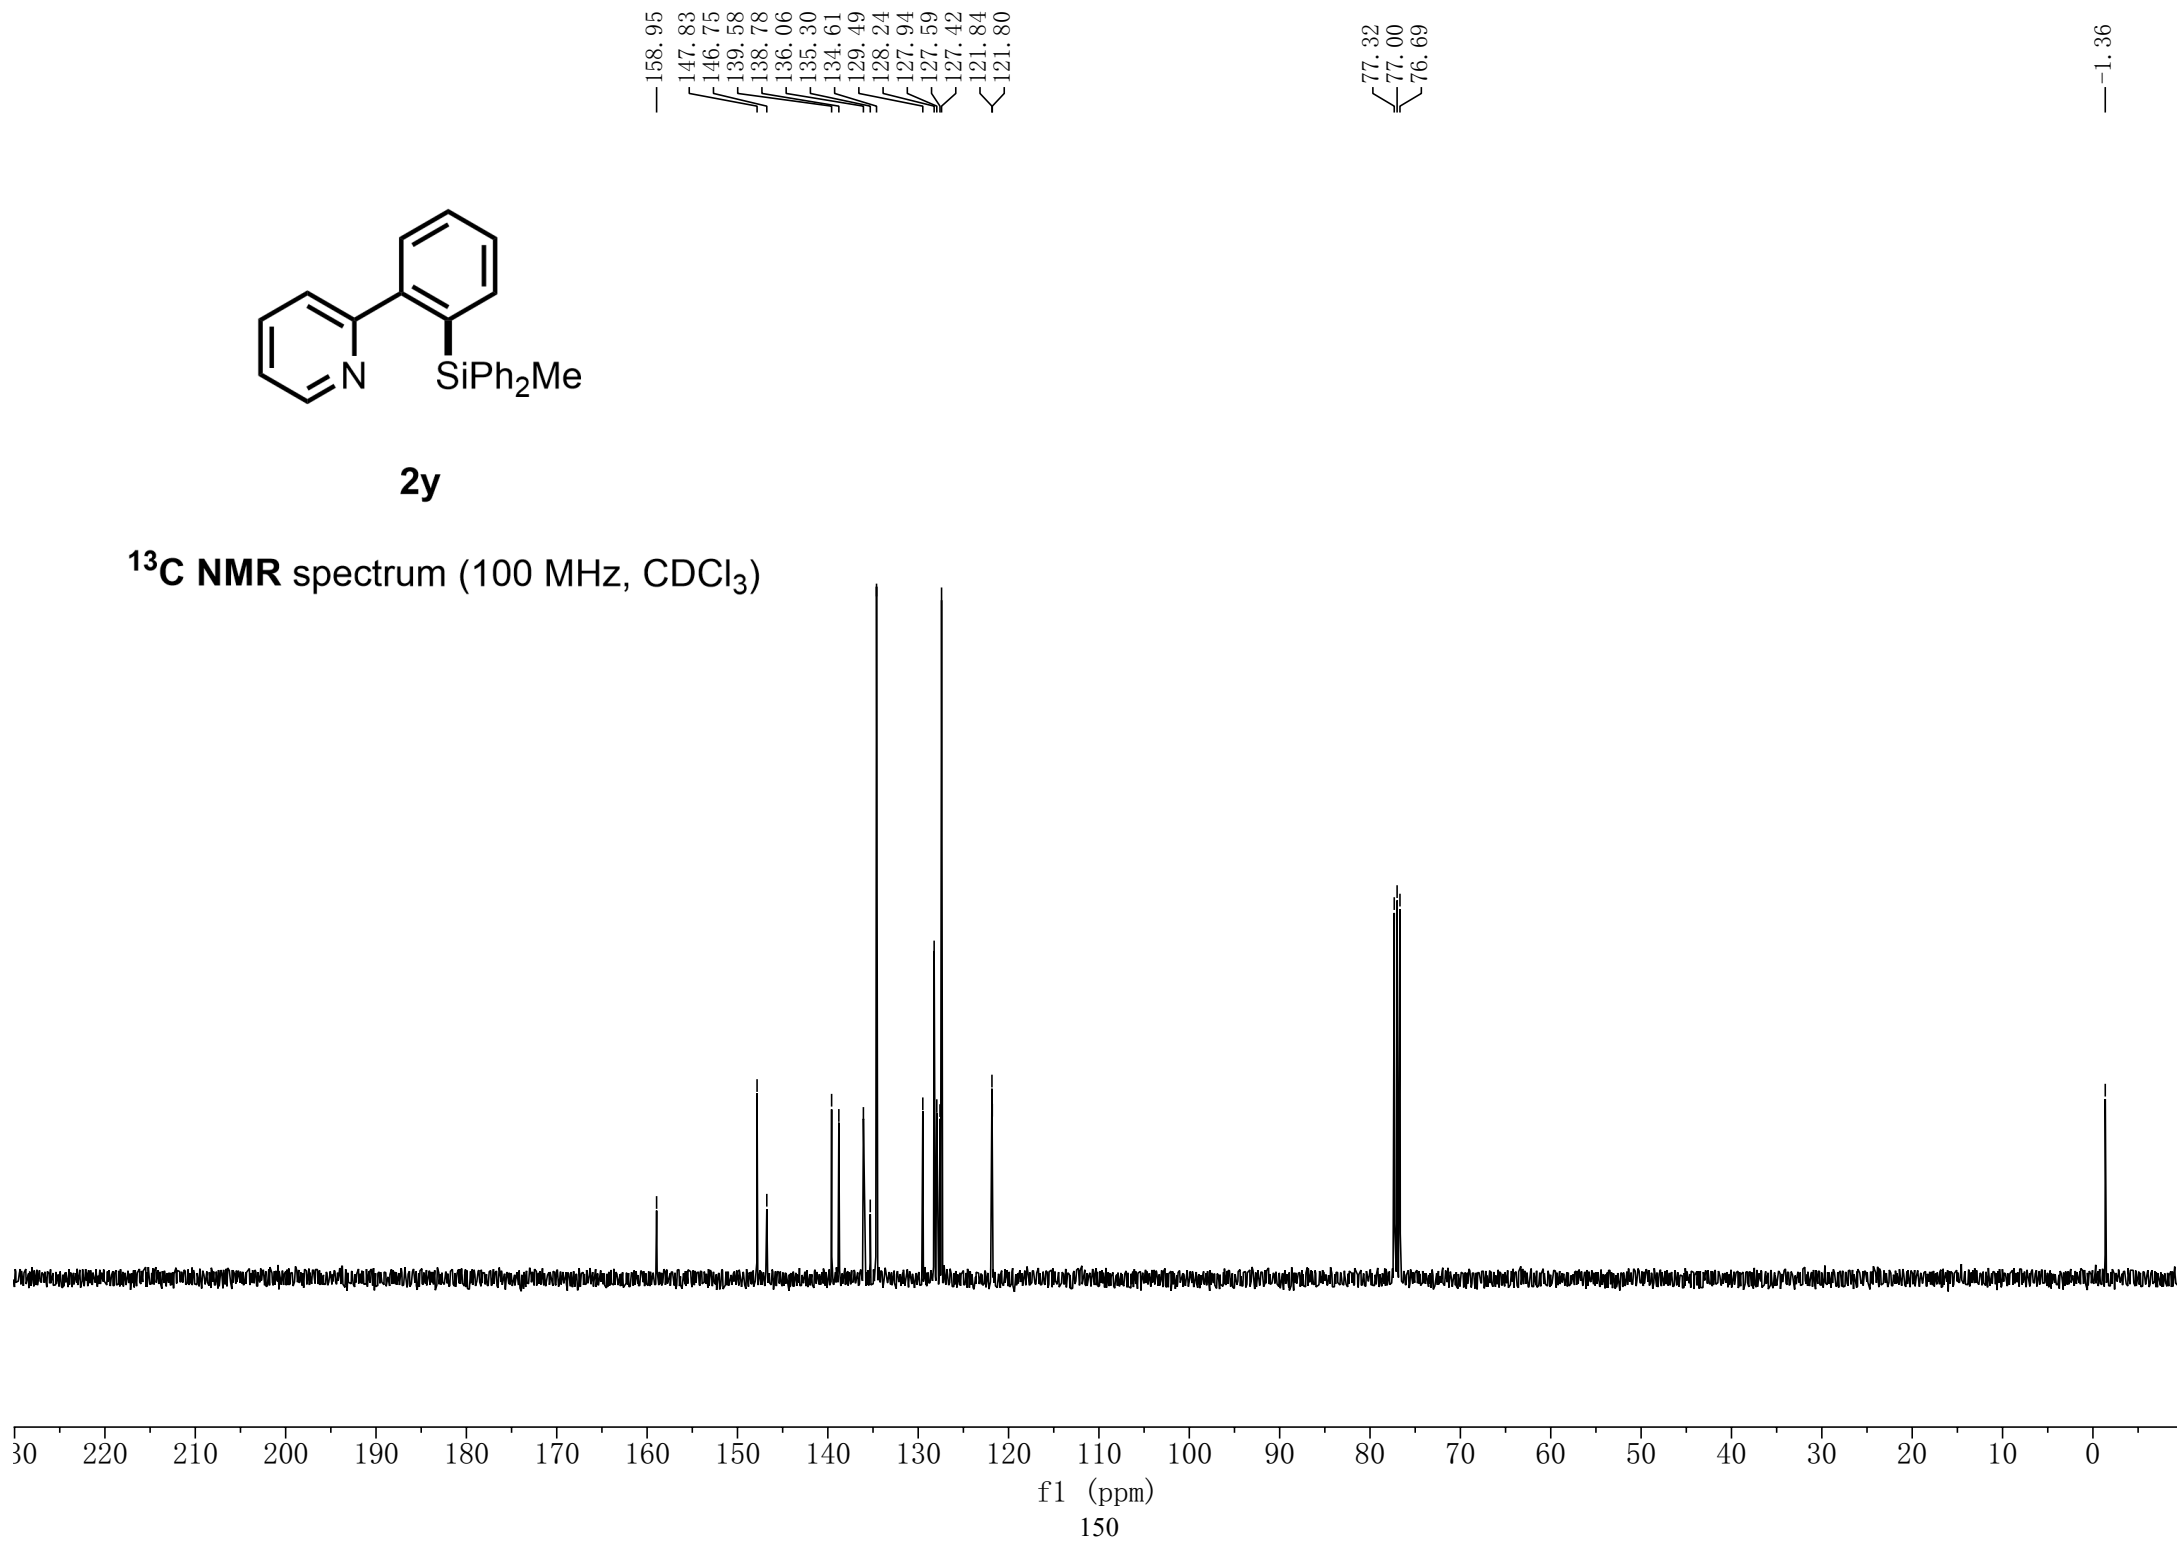

8.48  
8.47  
8.47  
8.47  
8.46  
8.46  
8.46  
7.65  
7.65  
7.65  
7.63  
7.63  
7.57  
7.56  
7.54  
7.53  
7.52  
7.51  
7.51  
7.50  
7.49  
7.46  
7.46  
7.44  
7.44  
7.42  
7.42  
7.41  
7.41  
7.40  
7.40  
7.39  
7.39  
7.38  
7.38  
7.36  
7.36  
7.34  
7.34  
7.33  
7.33  
7.33  
7.31  
7.31  
7.31  
7.25  
7.25  
7.24  
7.24  
7.24  
7.23  
7.23  
7.23  
7.22  
7.22  
7.13  
7.12  
7.11  
7.11  
7.11  
7.10  
7.09  
7.09

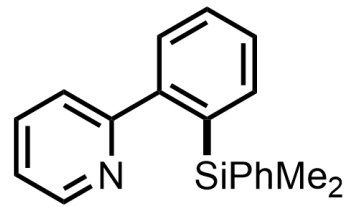

**2z**

<sup>1</sup>H NMR spectrum (400 MHz, CDCl<sub>3</sub>)

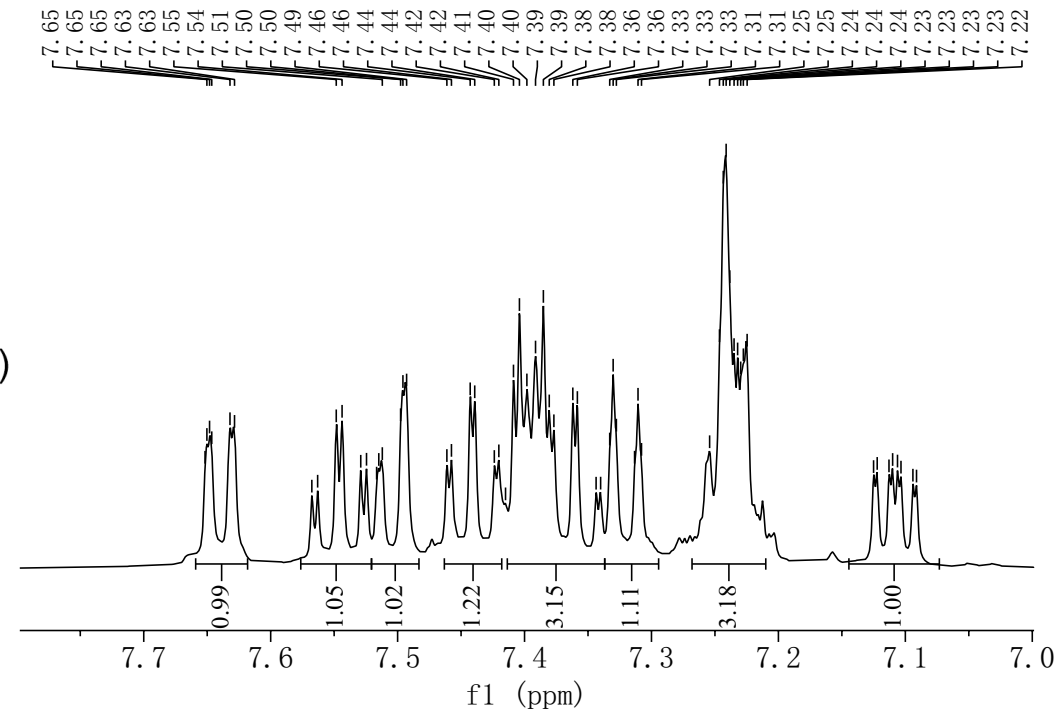

—0.35

—0.00

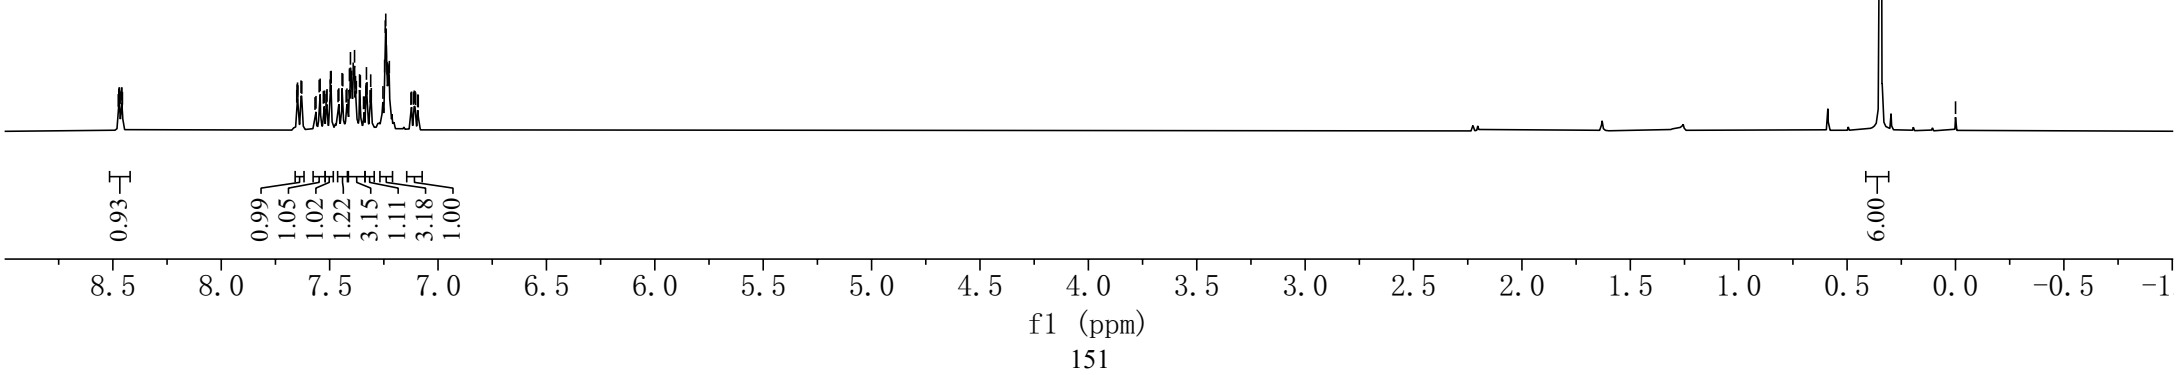

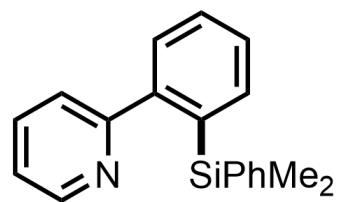

**2z**

<sup>13</sup>C NMR spectrum (100 MHz, CDCl<sub>3</sub>)

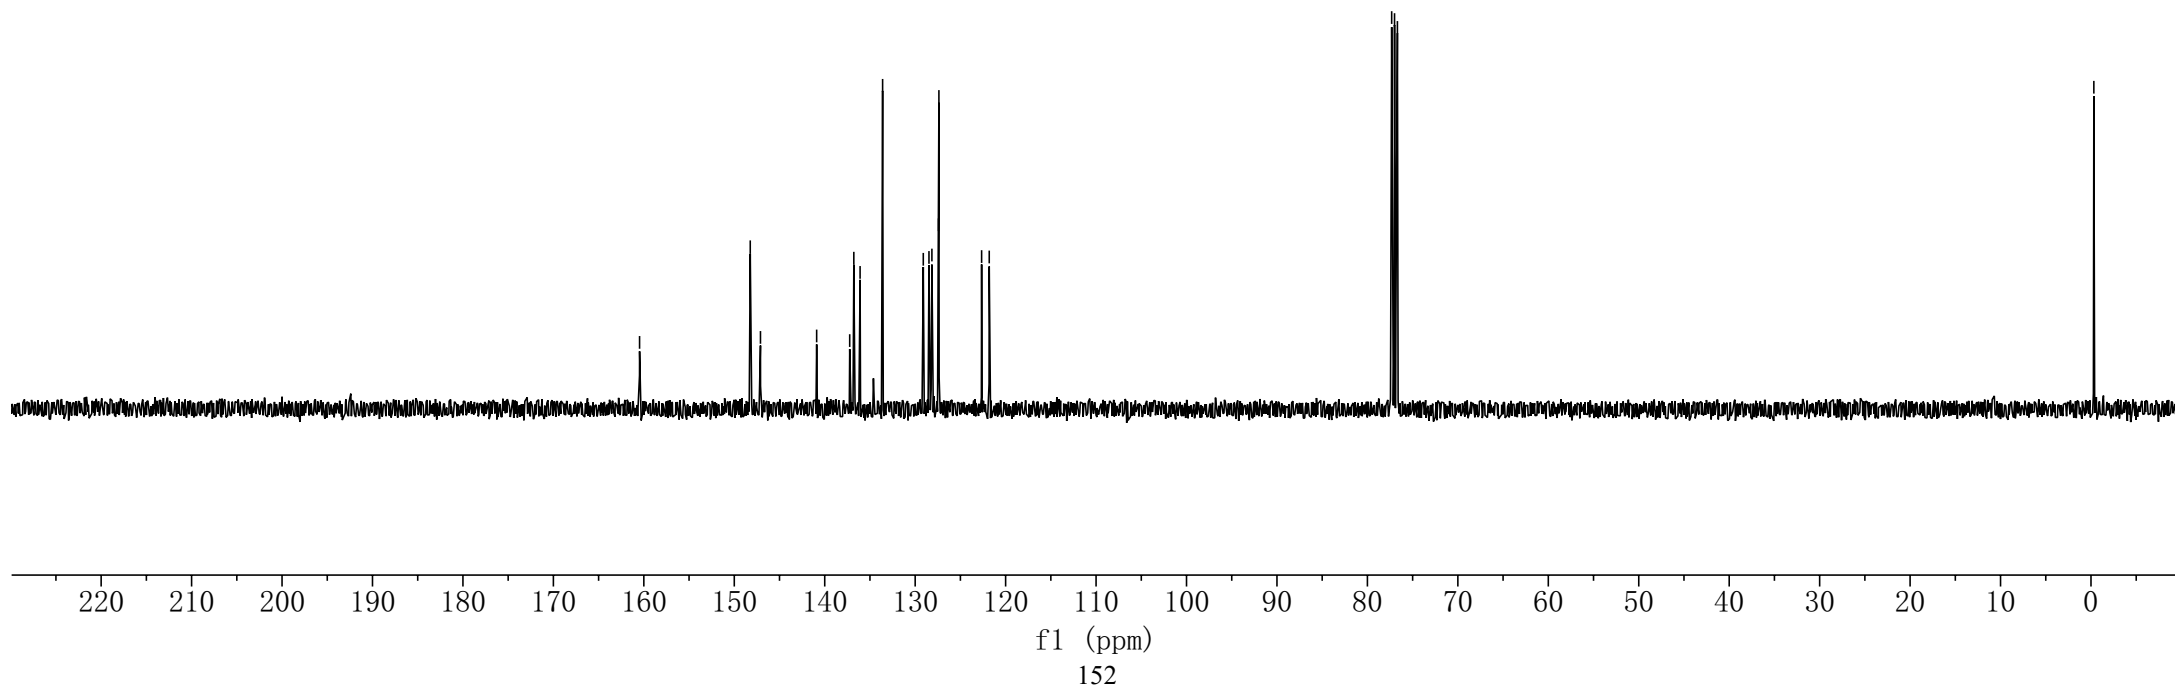



8.58  
8.56  
7.53  
7.51  
7.49  
7.49  
7.31  
7.29  
7.27  
7.24  
7.22  
7.20  
7.10  
7.09  
7.07  
6.87  
6.85

4.34

0.93  
0.91  
0.89  
0.84  
0.82  
0.80  
0.79

0.00

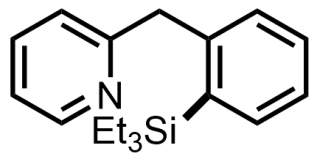

**4a**

<sup>1</sup>H NMR spectrum (400 MHz, CDCl<sub>3</sub>)

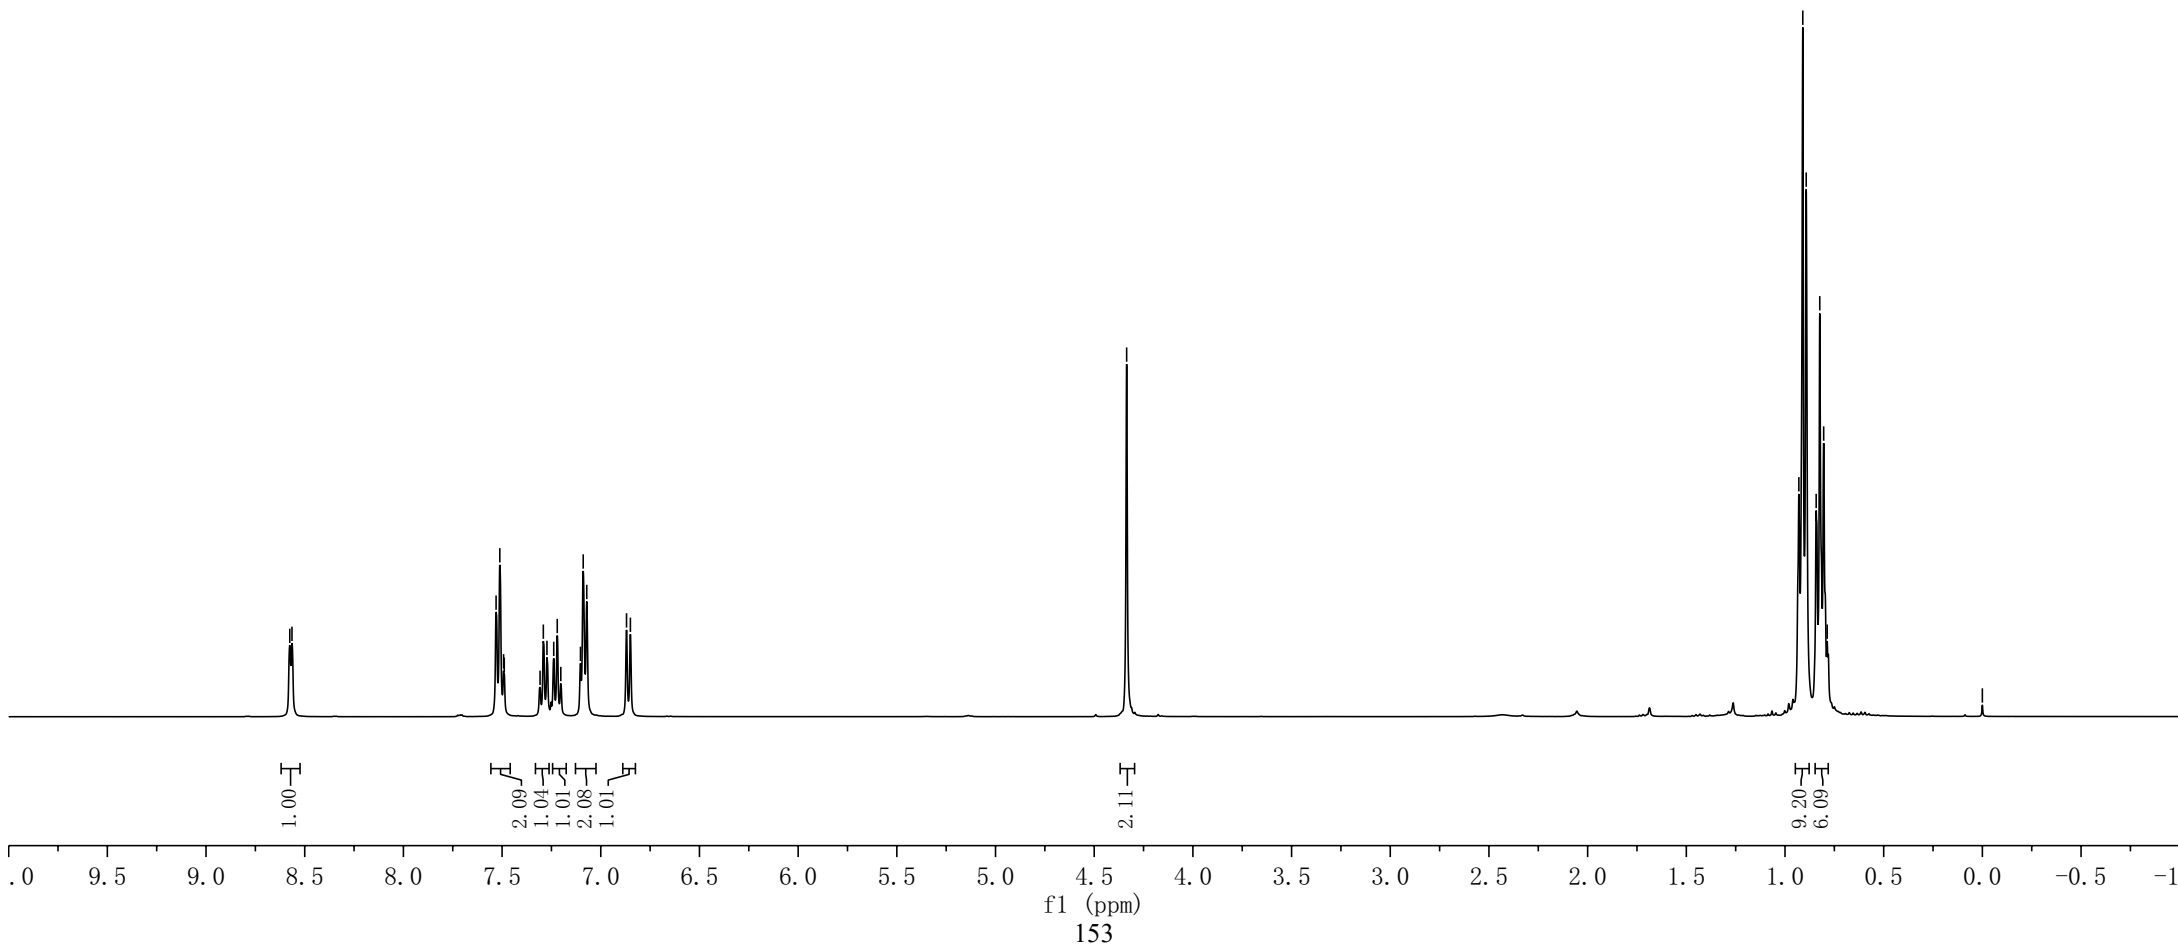

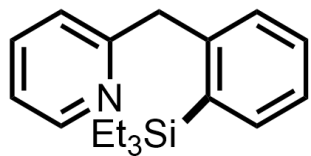

**4a**

<sup>13</sup>C NMR spectrum (100 MHz, CDCl<sub>3</sub>)

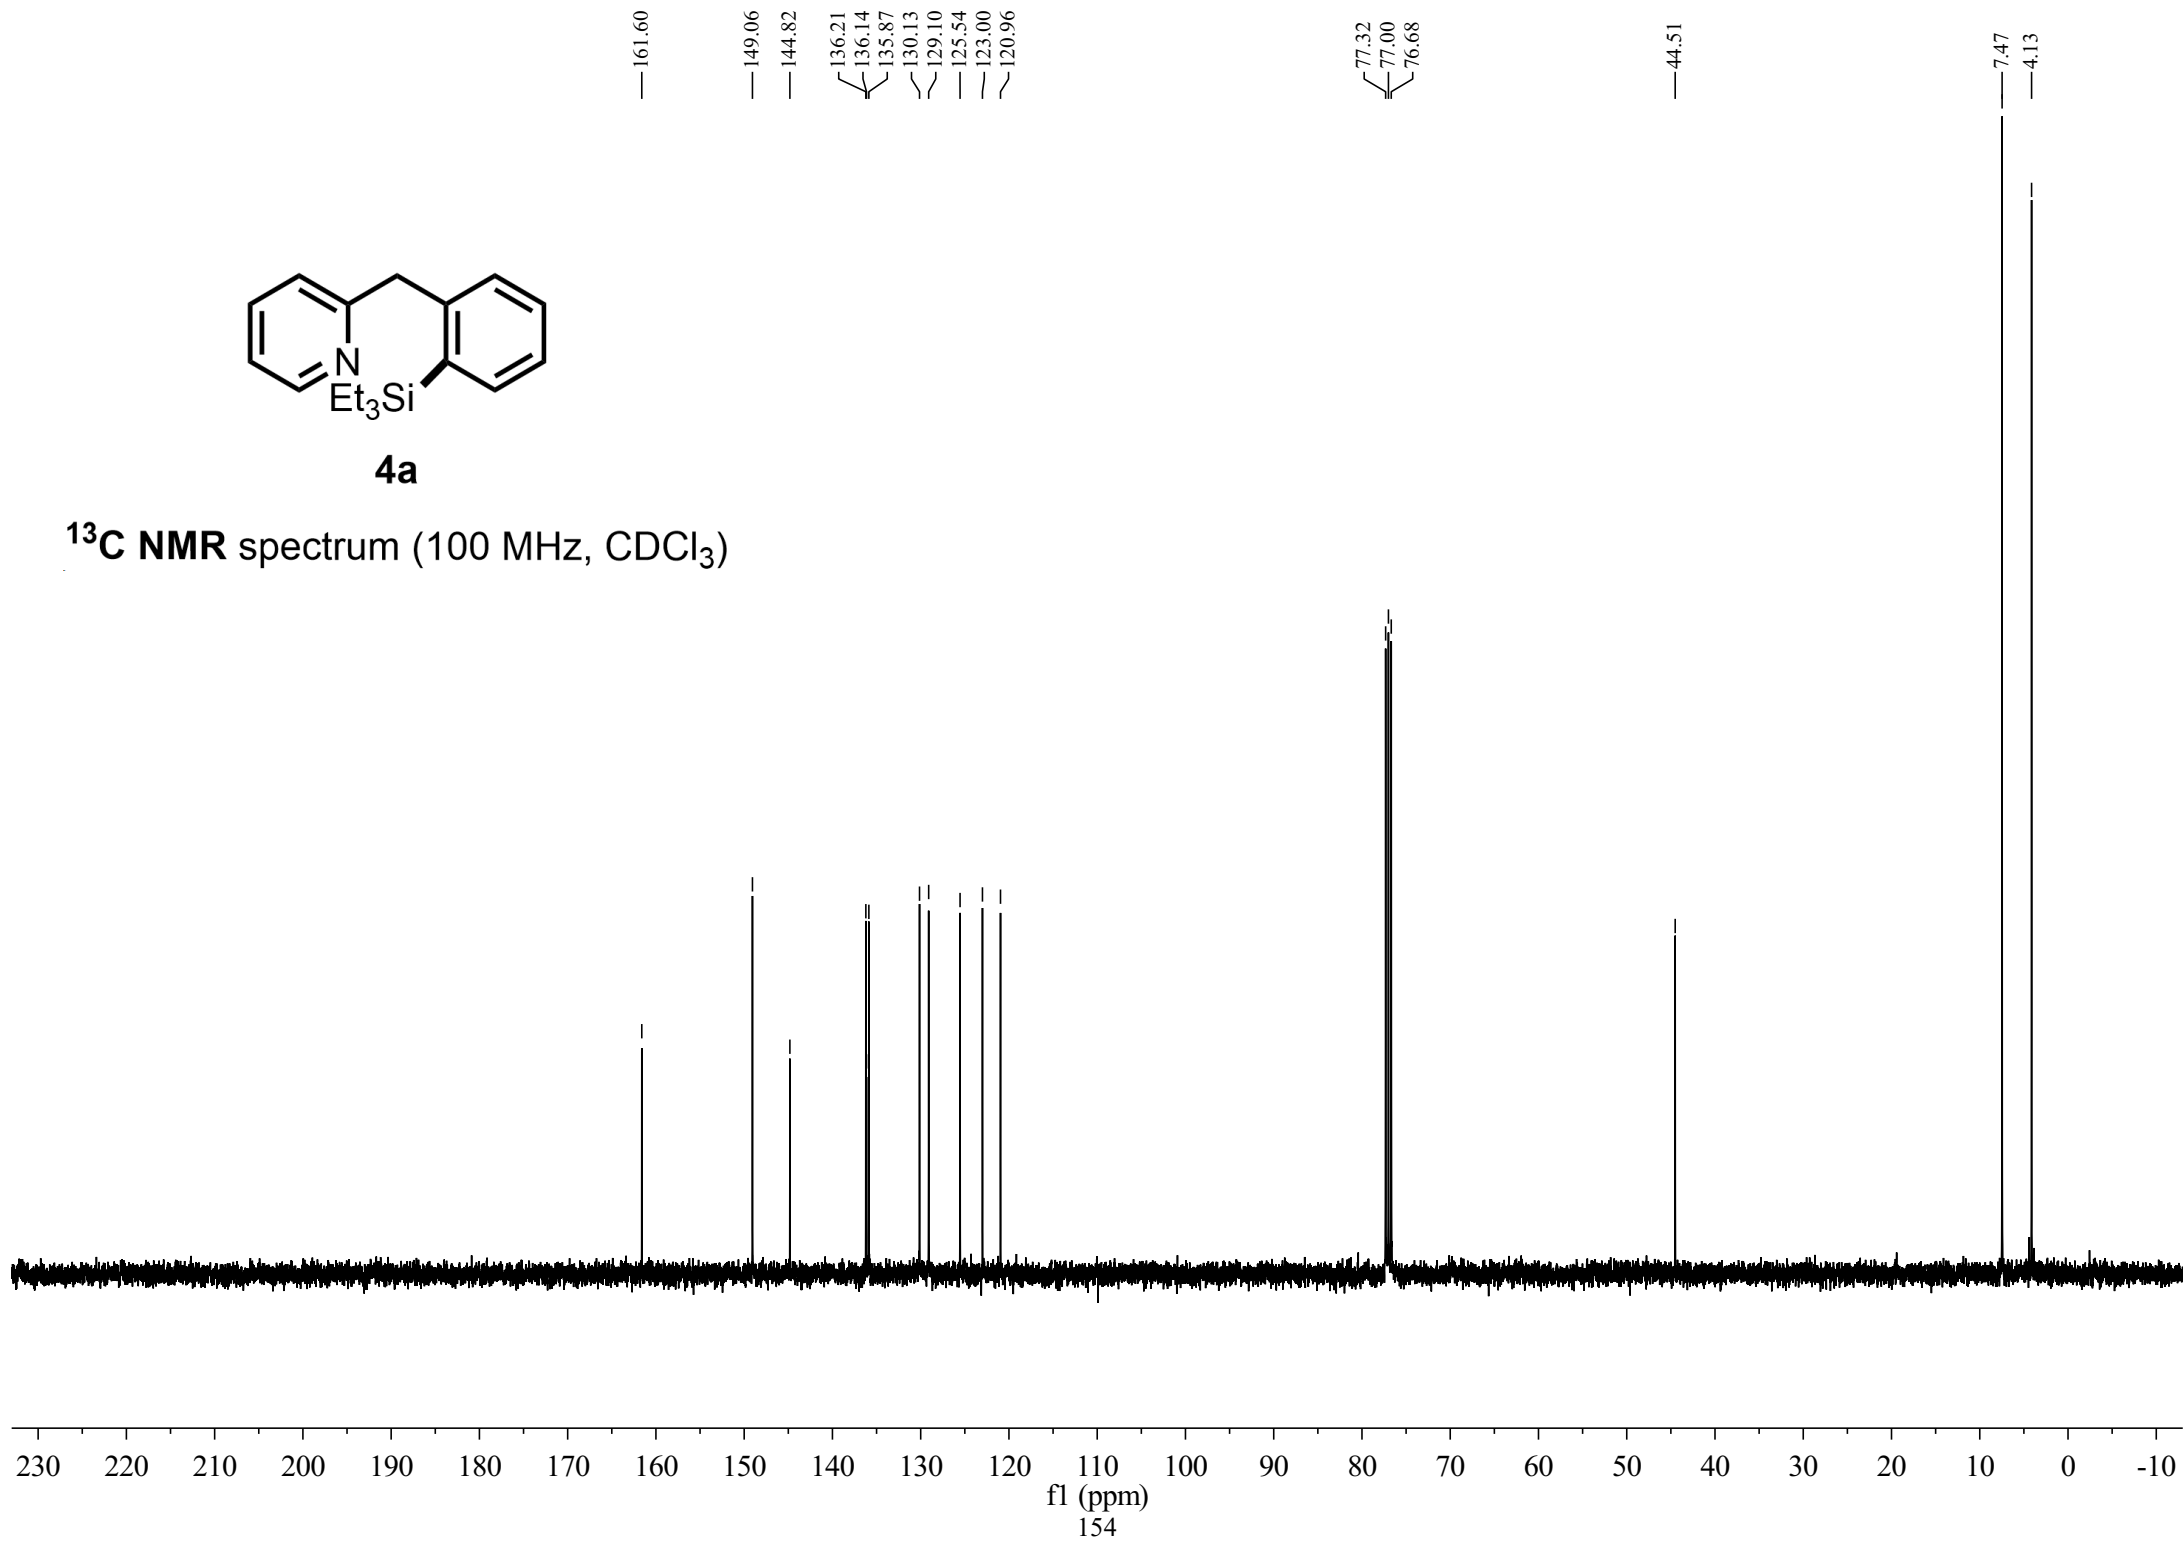

8.56  
8.55  
7.52  
7.51  
7.50  
7.50  
7.48  
7.48  
7.31  
7.11  
7.09  
7.08  
7.06  
6.99  
6.97  
6.88  
6.86

4.30

2.33

0.93  
0.91  
0.89  
0.83  
0.83  
0.82  
0.79

-0.00

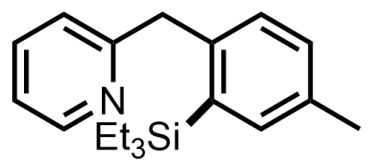

**4b**

**<sup>1</sup>H NMR spectrum (400 MHz, CDCl<sub>3</sub>)**

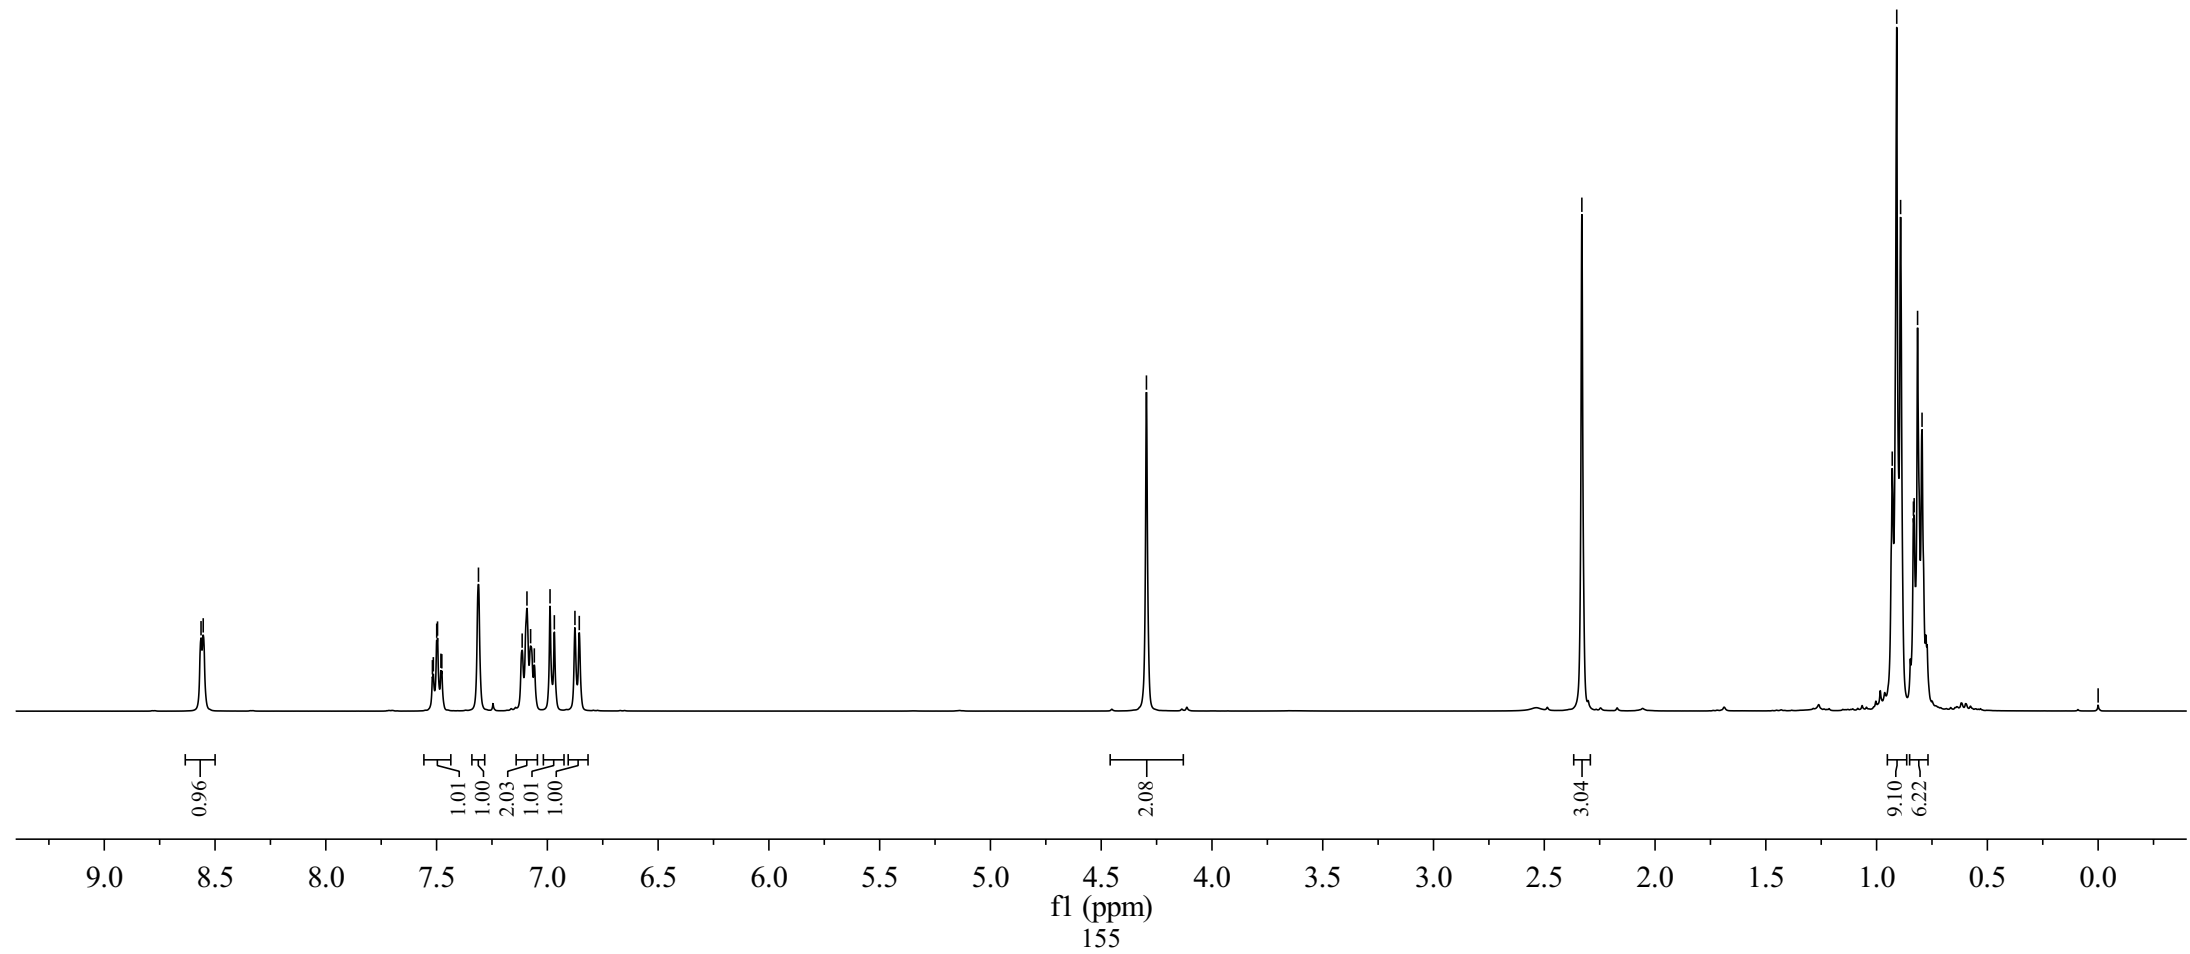

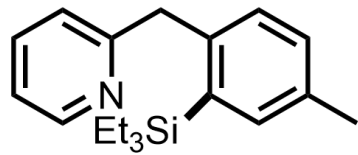

4b

<sup>13</sup>C NMR spectrum (100 MHz, CDCl<sub>3</sub>)

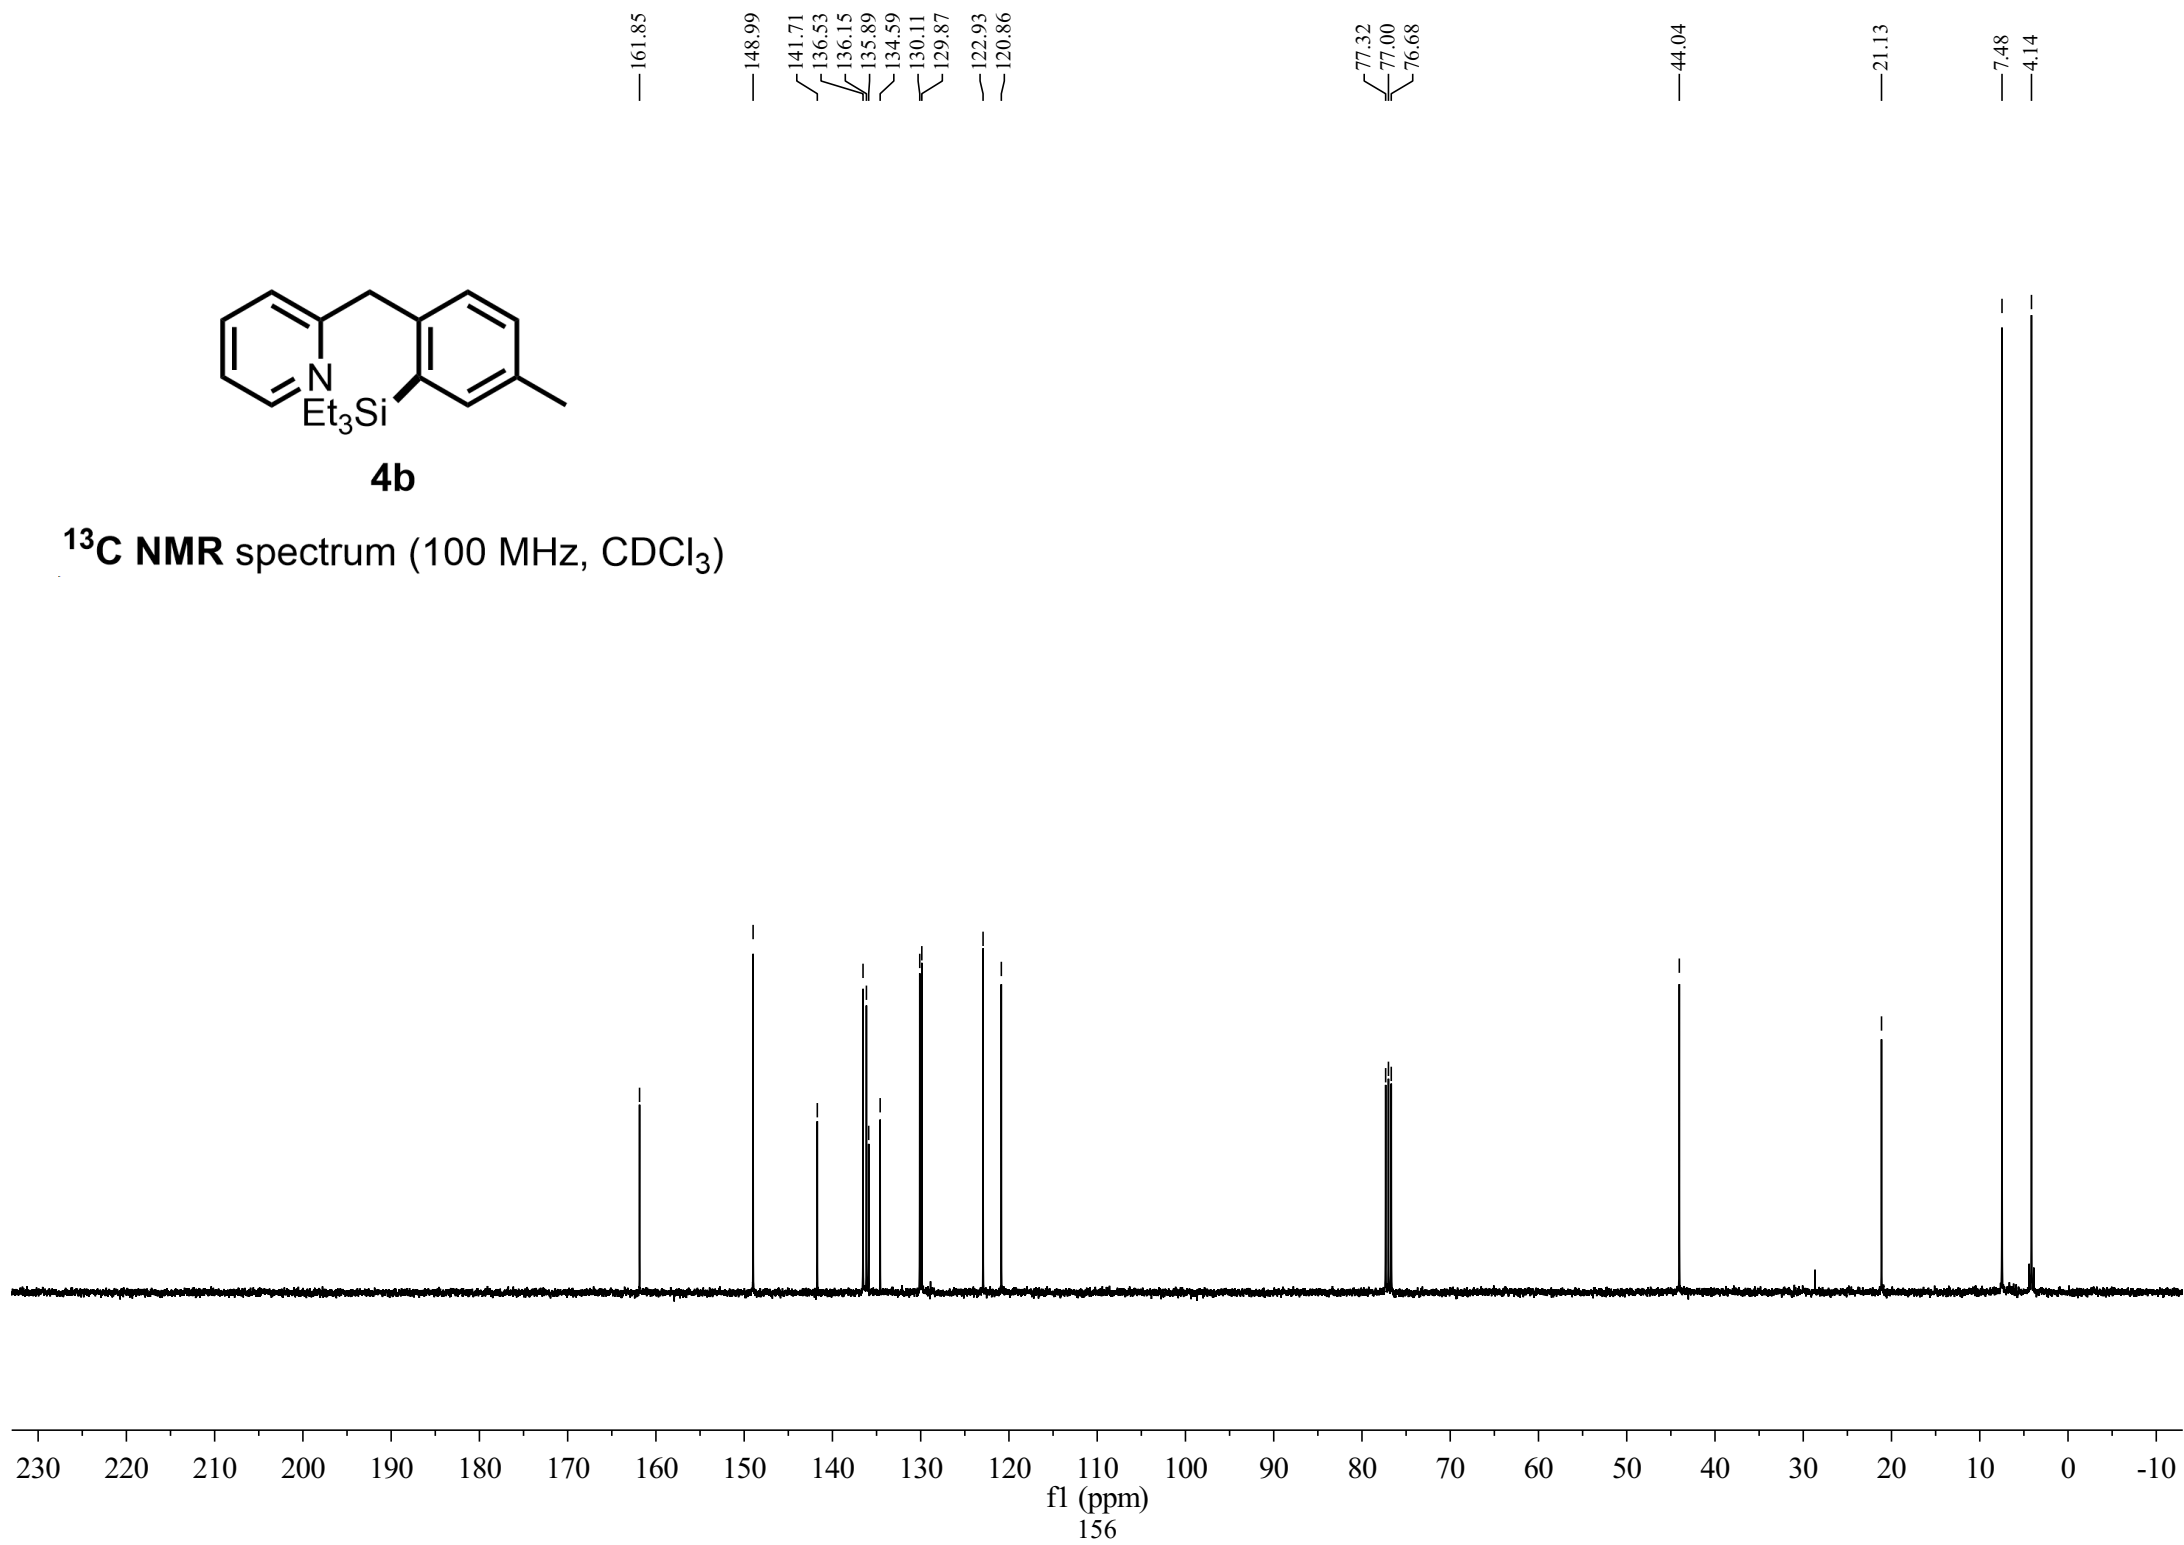

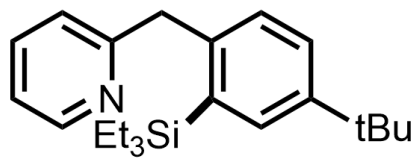

4c

<sup>1</sup>H NMR spectrum (400 MHz, CDCl<sub>3</sub>)

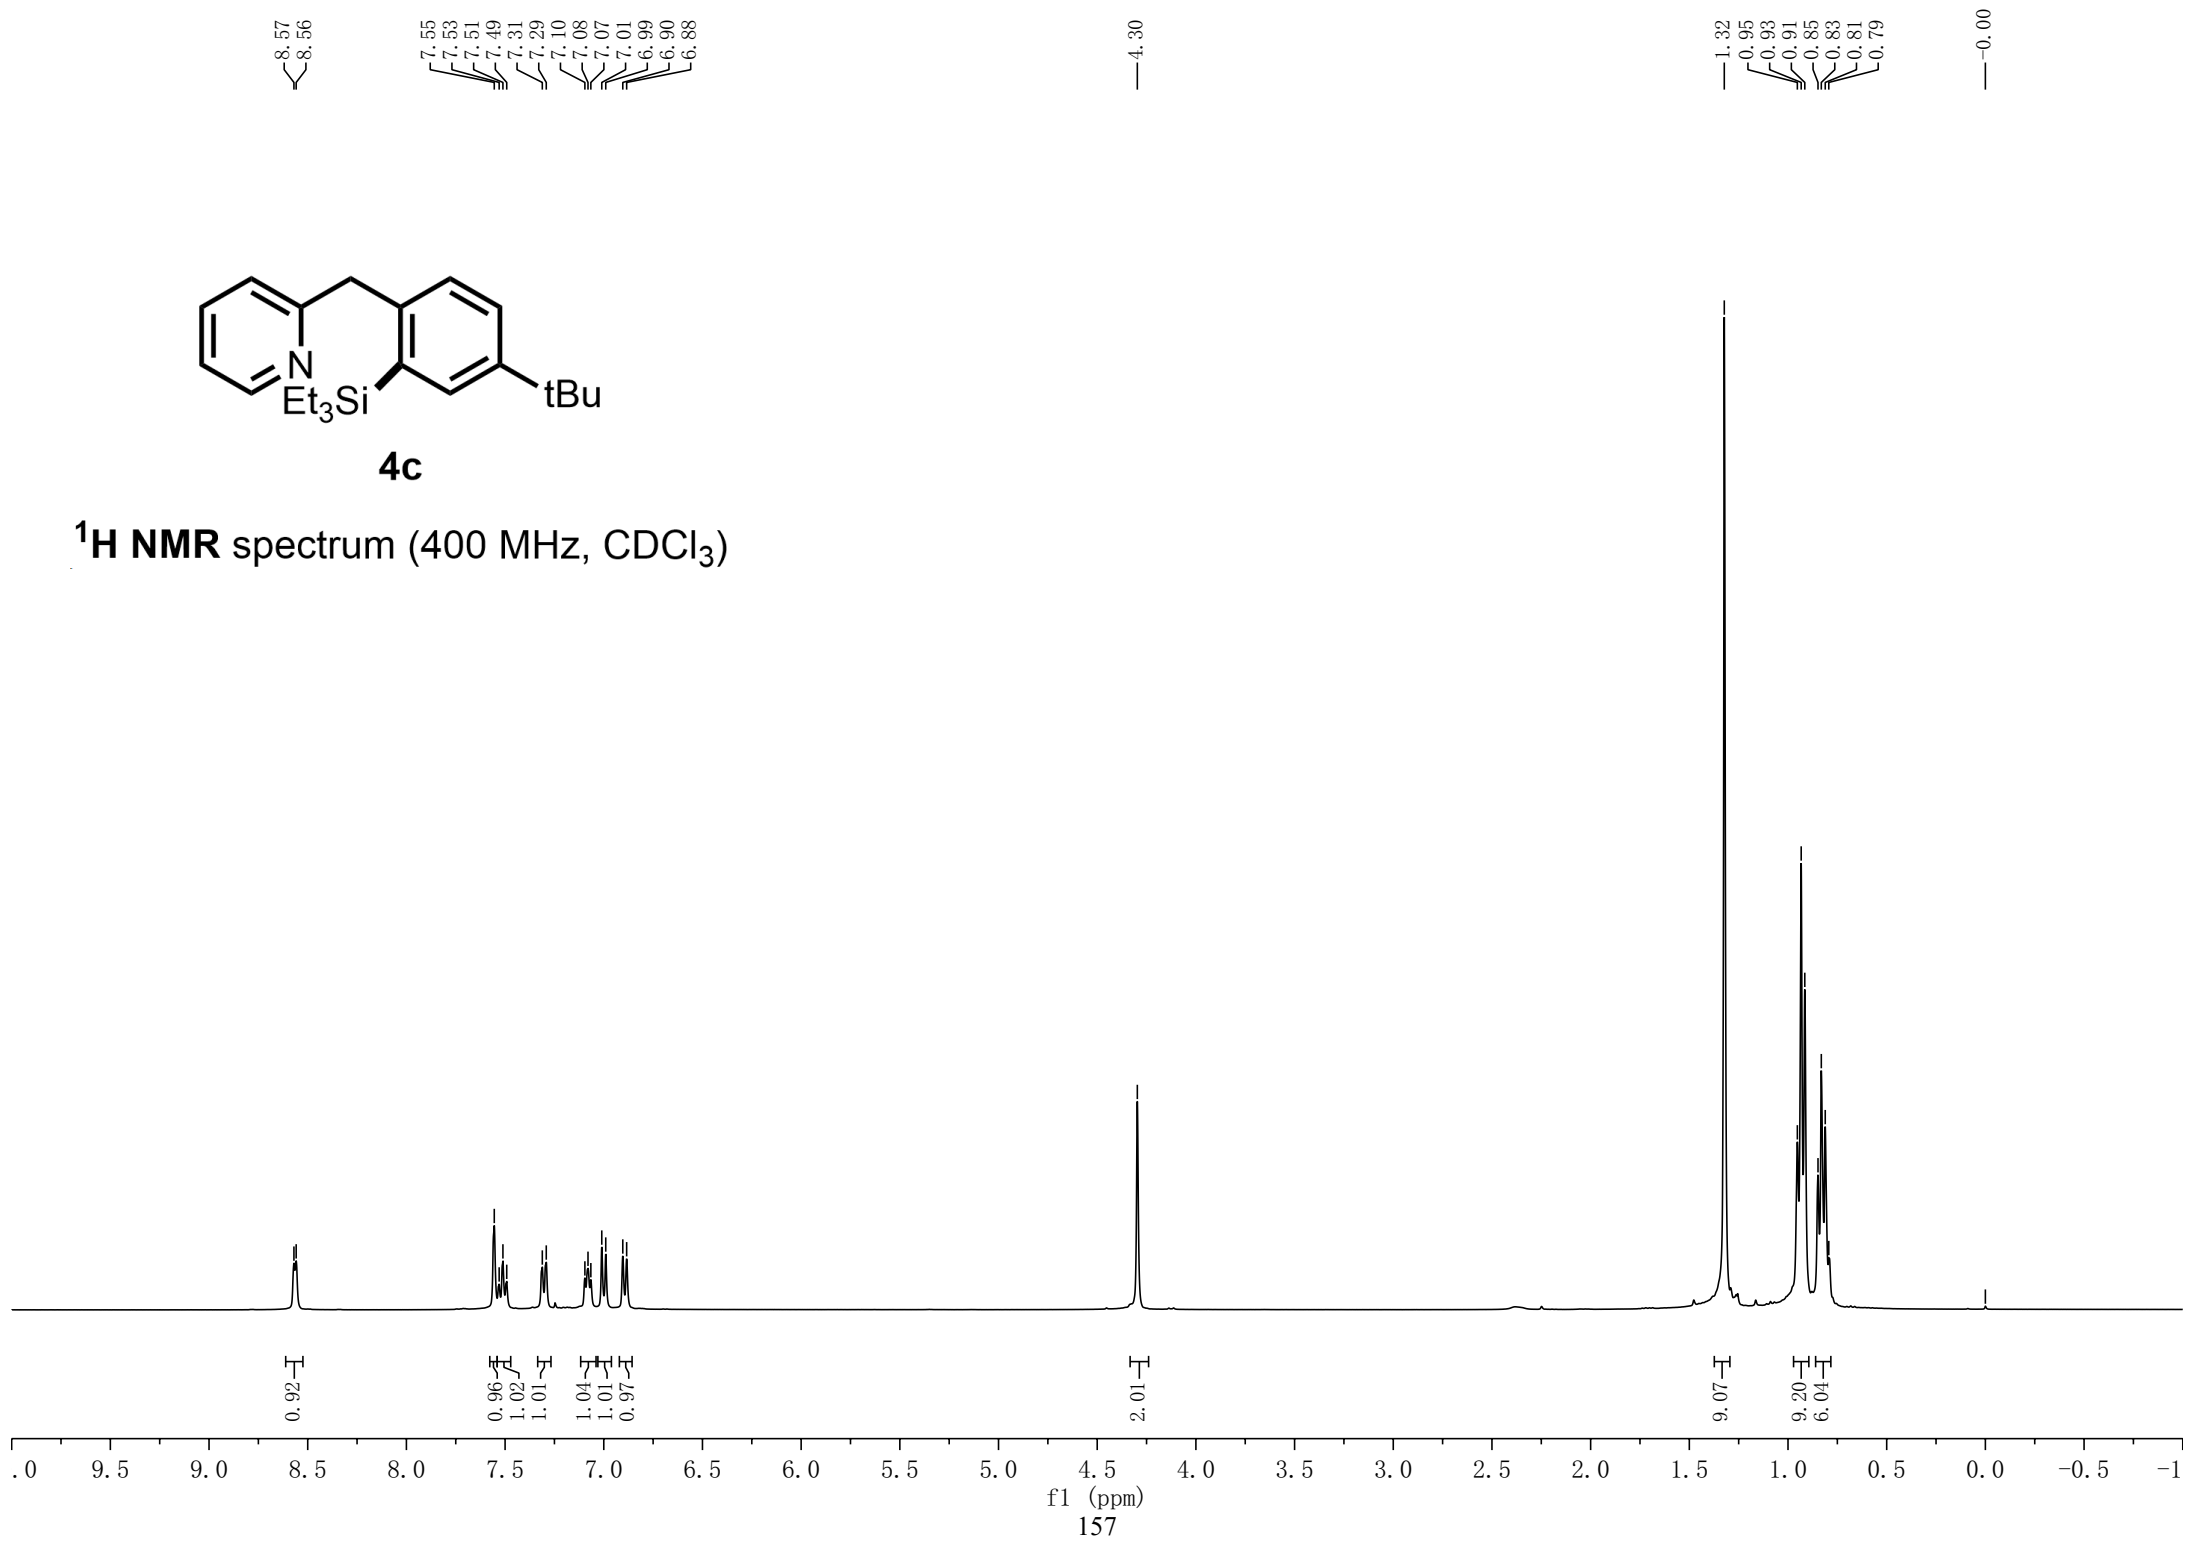

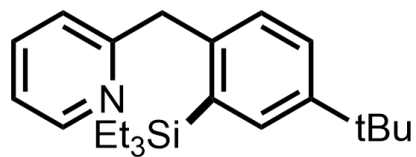

**4c**

**<sup>13</sup>C NMR spectrum (100 MHz, CDCl<sub>3</sub>)**

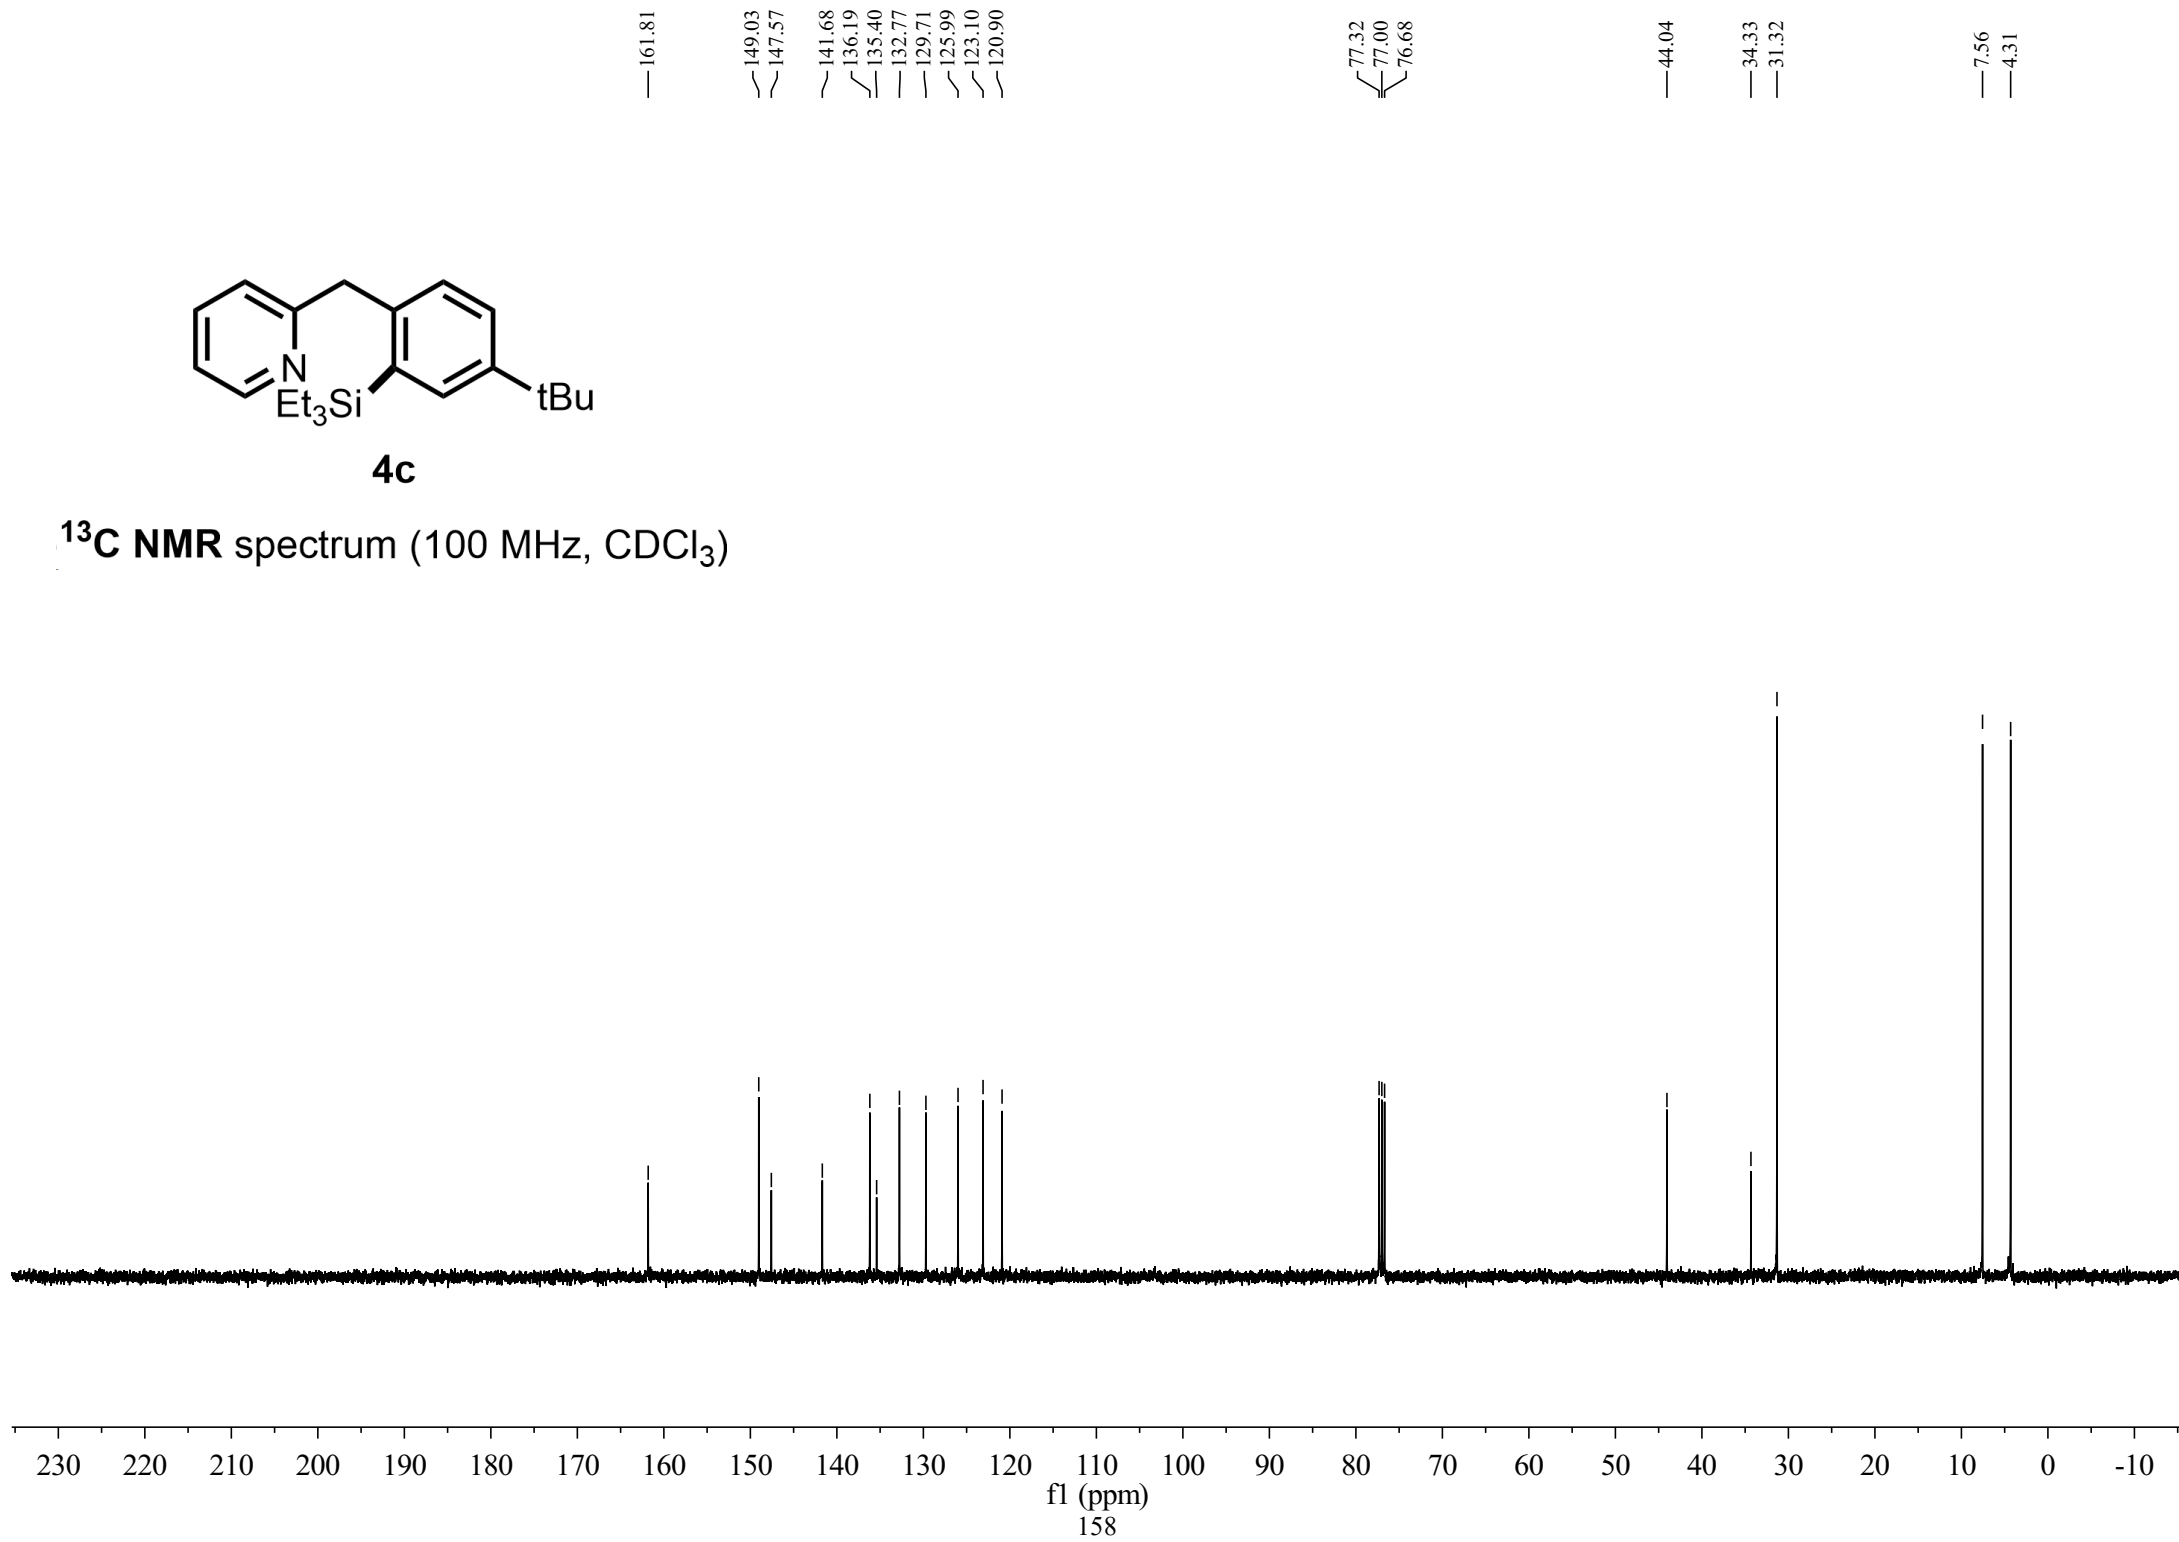

8.55  
8.54  
7.51  
7.49  
7.47  
7.07  
7.06  
7.04  
6.98  
6.96  
6.94  
6.93  
6.89  
6.87  
6.73  
6.72  
6.71  
6.70

4.24

2.93

0.94  
0.92  
0.90  
0.83  
0.81  
0.79  
0.77

0.00

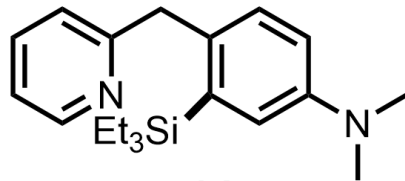

**4d**

<sup>1</sup>H NMR spectrum (400 MHz, CDCl<sub>3</sub>)

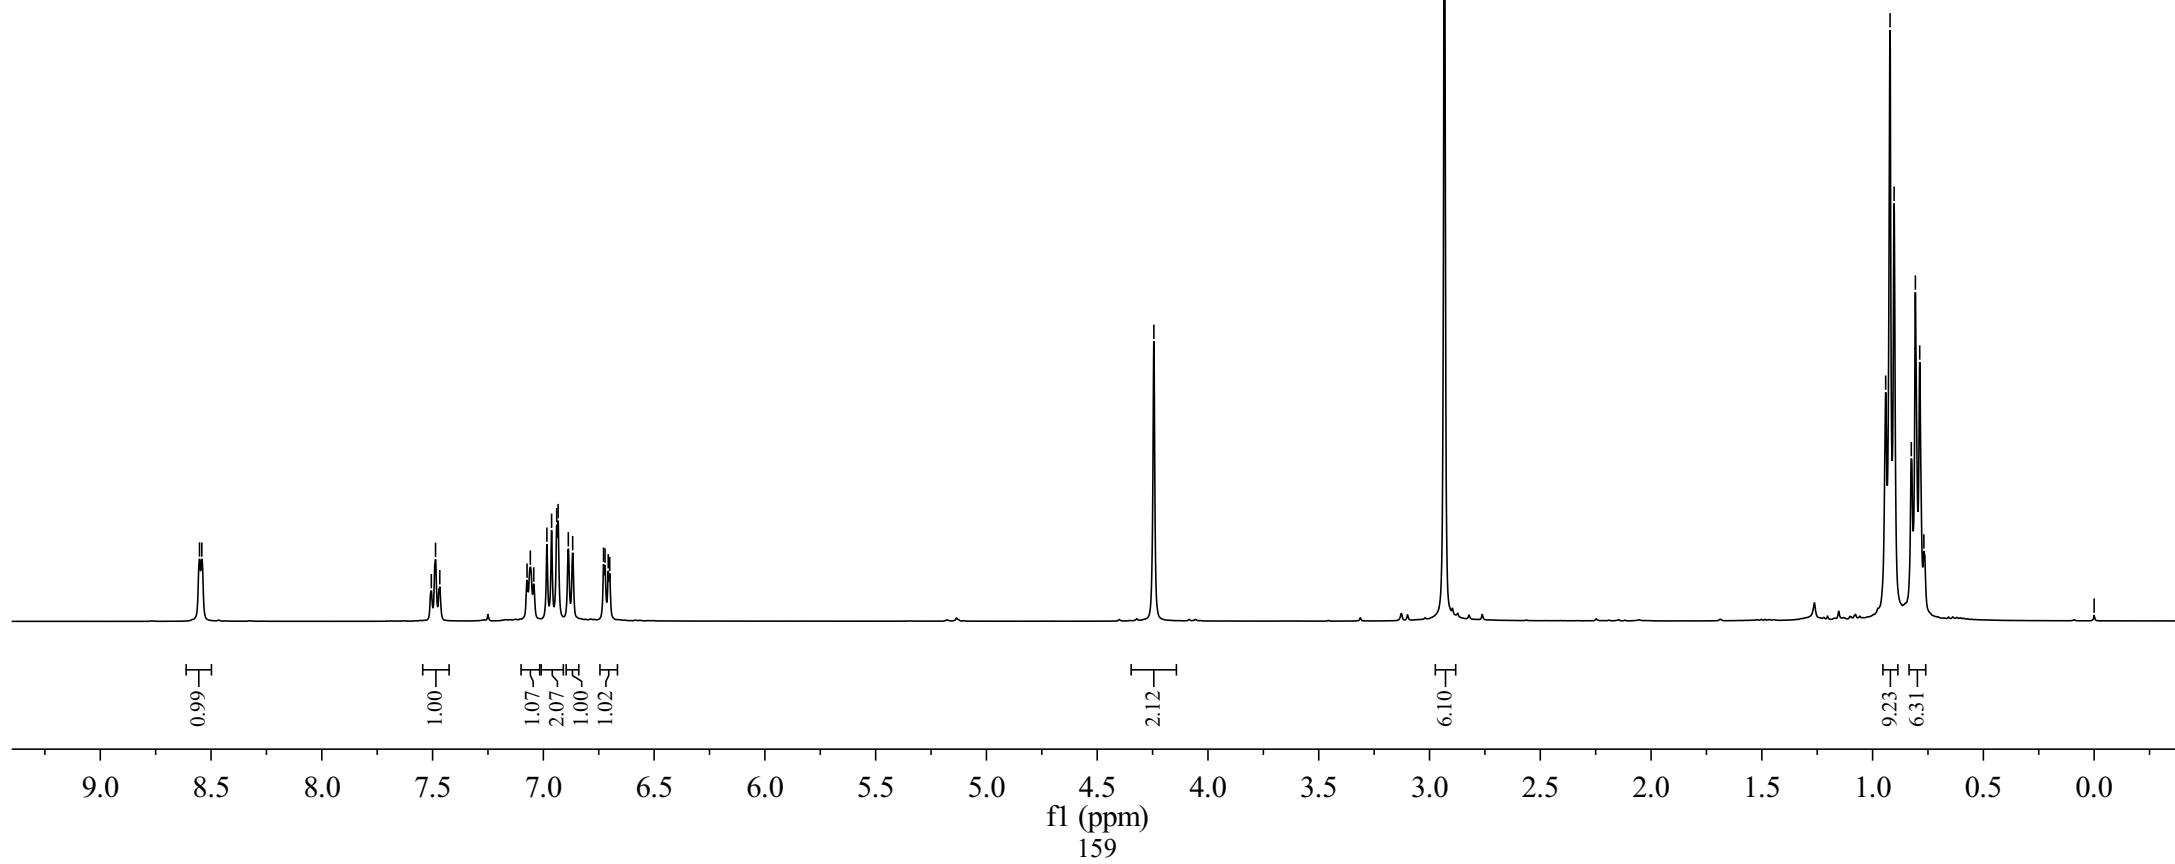

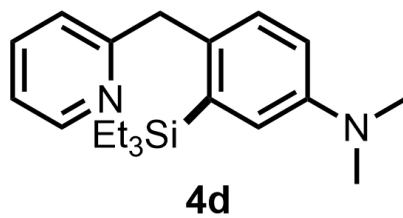

<sup>13</sup>C NMR spectrum (100 MHz, CDCl<sub>3</sub>)

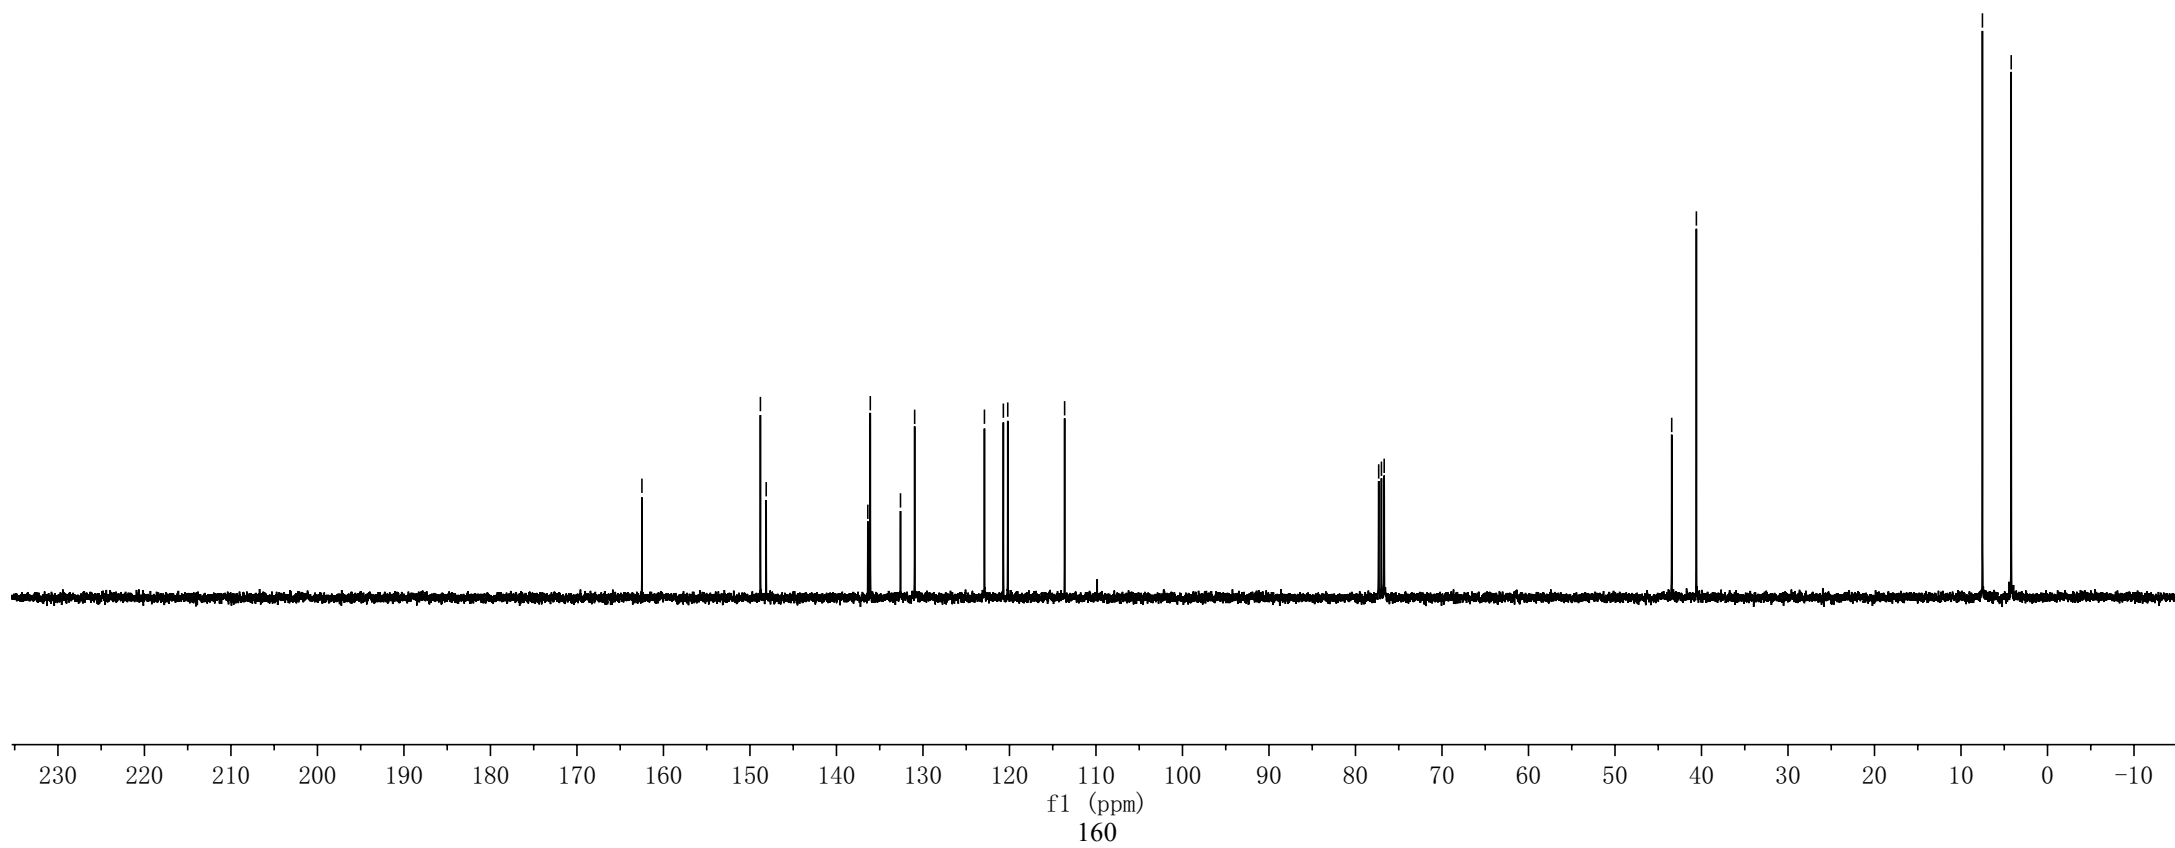



8.57  
8.56  
7.53  
7.53  
7.51  
7.51  
7.49  
7.49  
7.10  
7.08  
7.08  
7.07  
7.04  
7.01  
6.88  
6.86  
6.85  
6.84  
6.83  
6.82

4.27

3.79

0.93  
0.91  
0.89  
0.83  
0.83  
0.81  
0.79  
0.77  
0.77

0.00

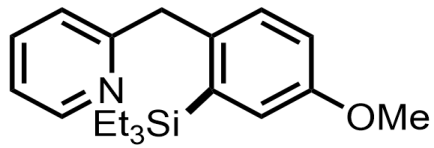

**4e**

**<sup>1</sup>H NMR spectrum (400 MHz, CDCl<sub>3</sub>)**

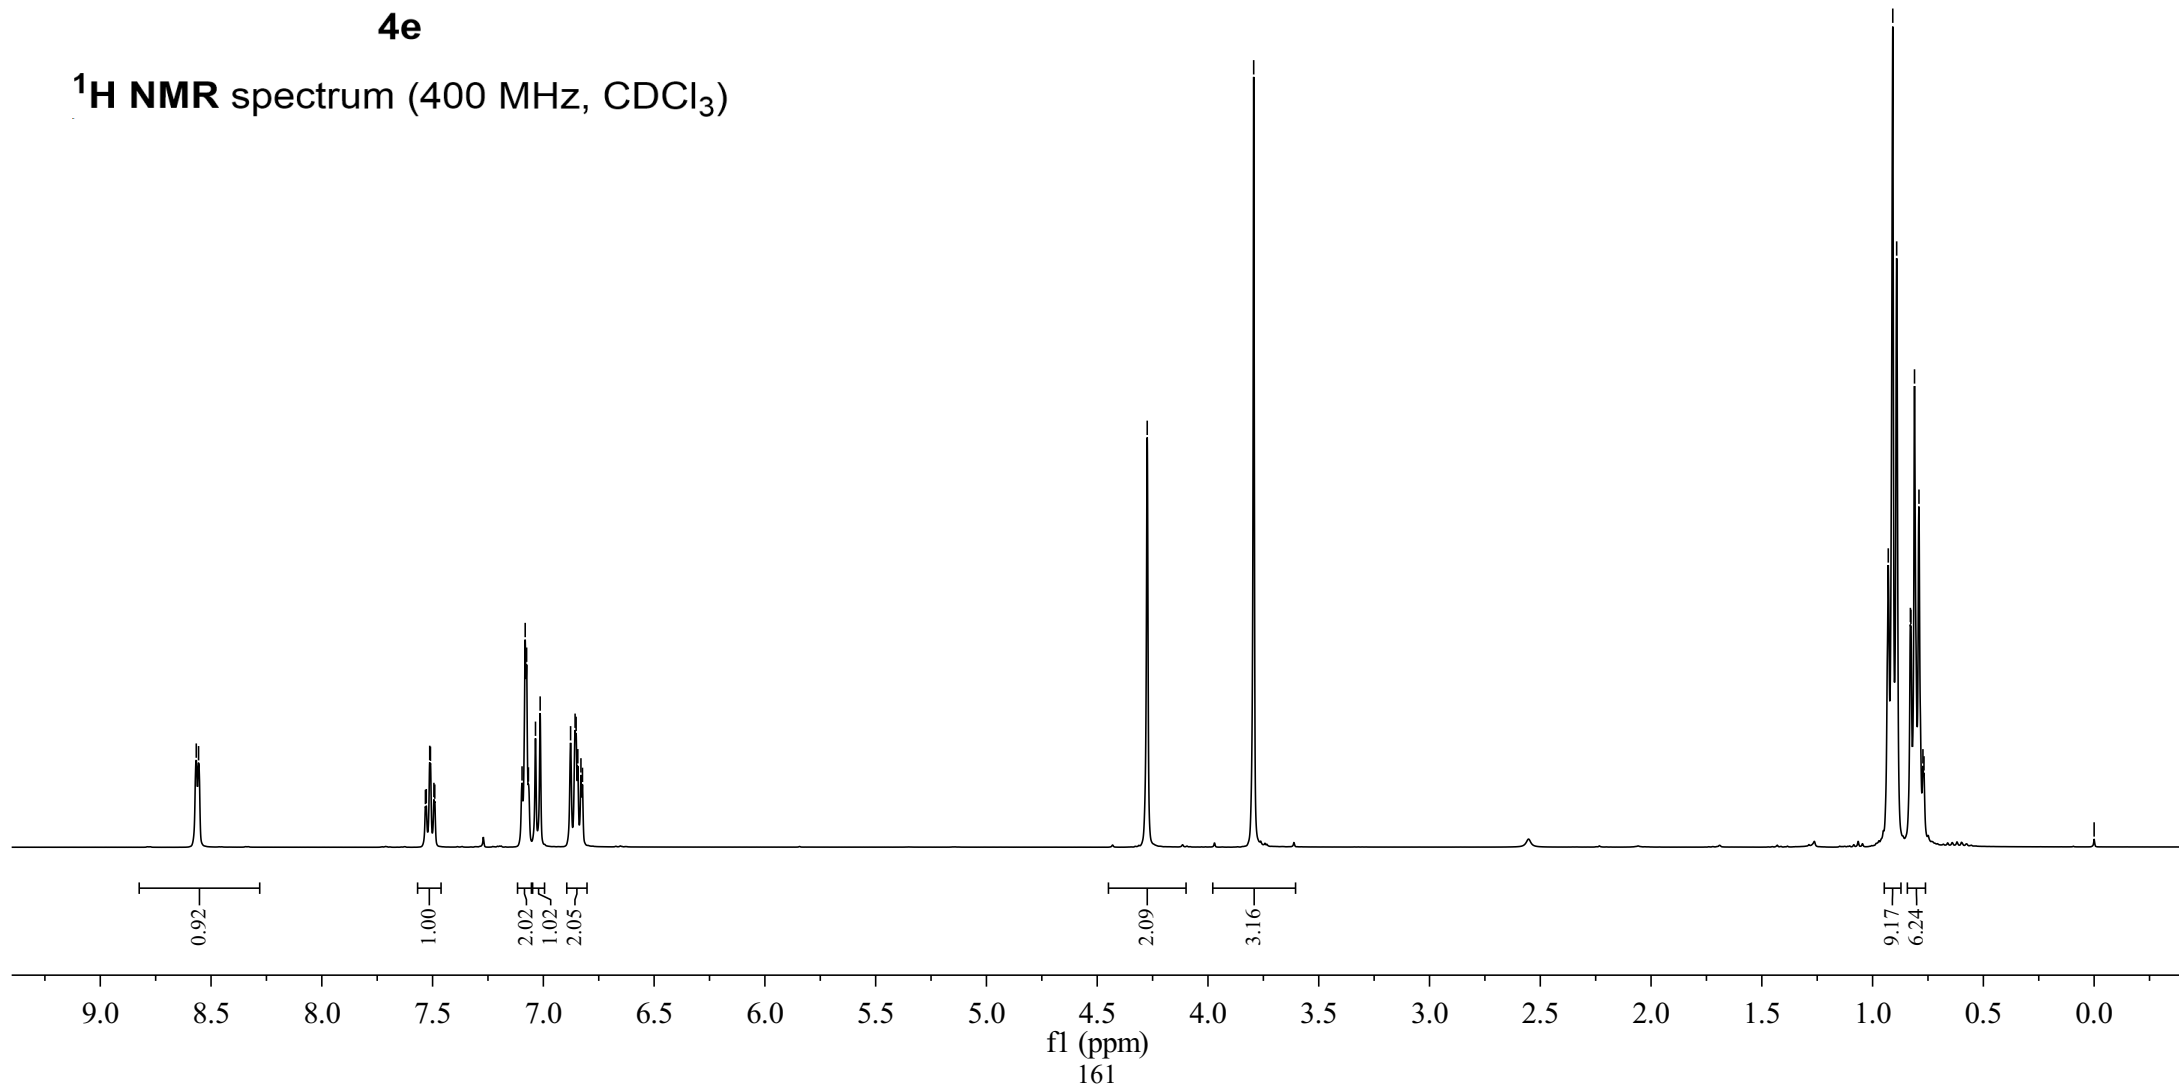

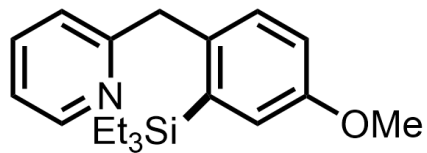

**4e**

<sup>13</sup>C NMR spectrum (100 MHz, CDCl<sub>3</sub>)

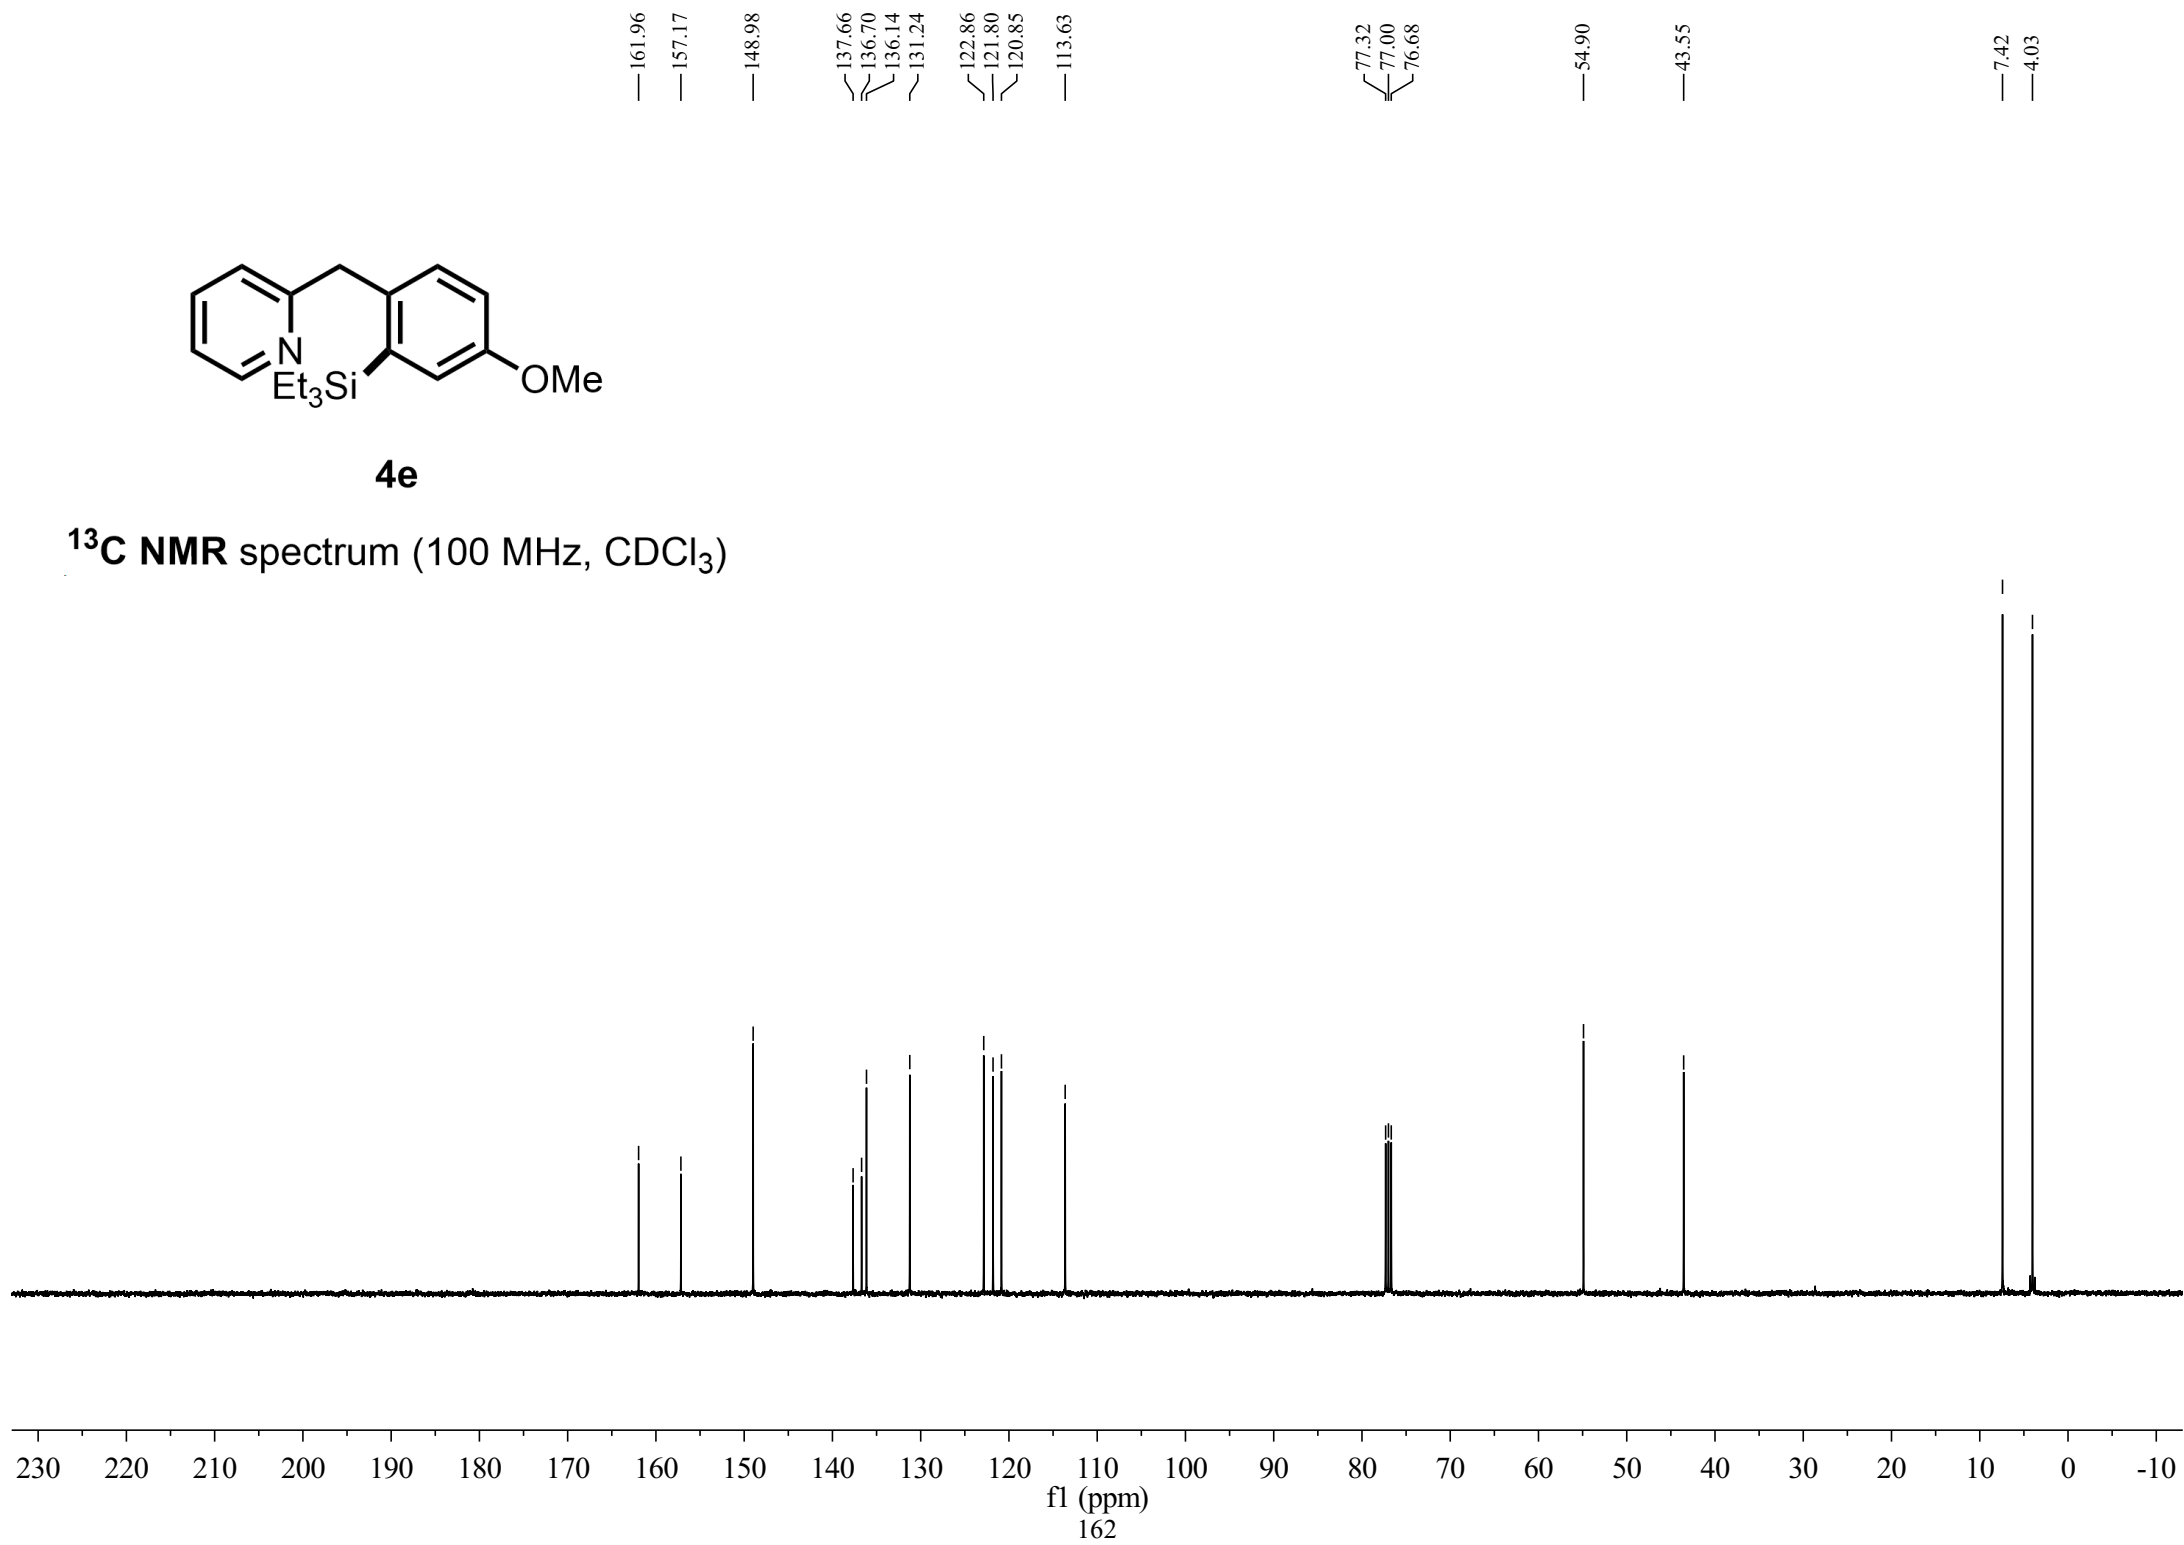

8.58  
8.57  
7.55  
7.53  
7.52  
7.51  
7.45  
7.43  
7.12  
7.10  
7.09  
6.91  
6.89  
6.80  
6.80  
6.78  
6.78  
6.65  
6.64  
4.30  
3.73  
0.92  
0.90  
0.89  
0.82  
0.81  
0.80  
0.78  
0.76  
0.75  
0.00

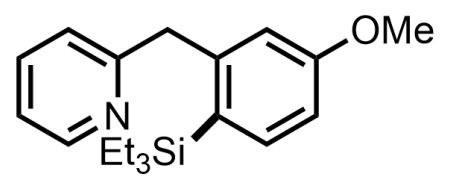

4f

<sup>1</sup>H NMR spectrum (400 MHz, CDCl<sub>3</sub>)

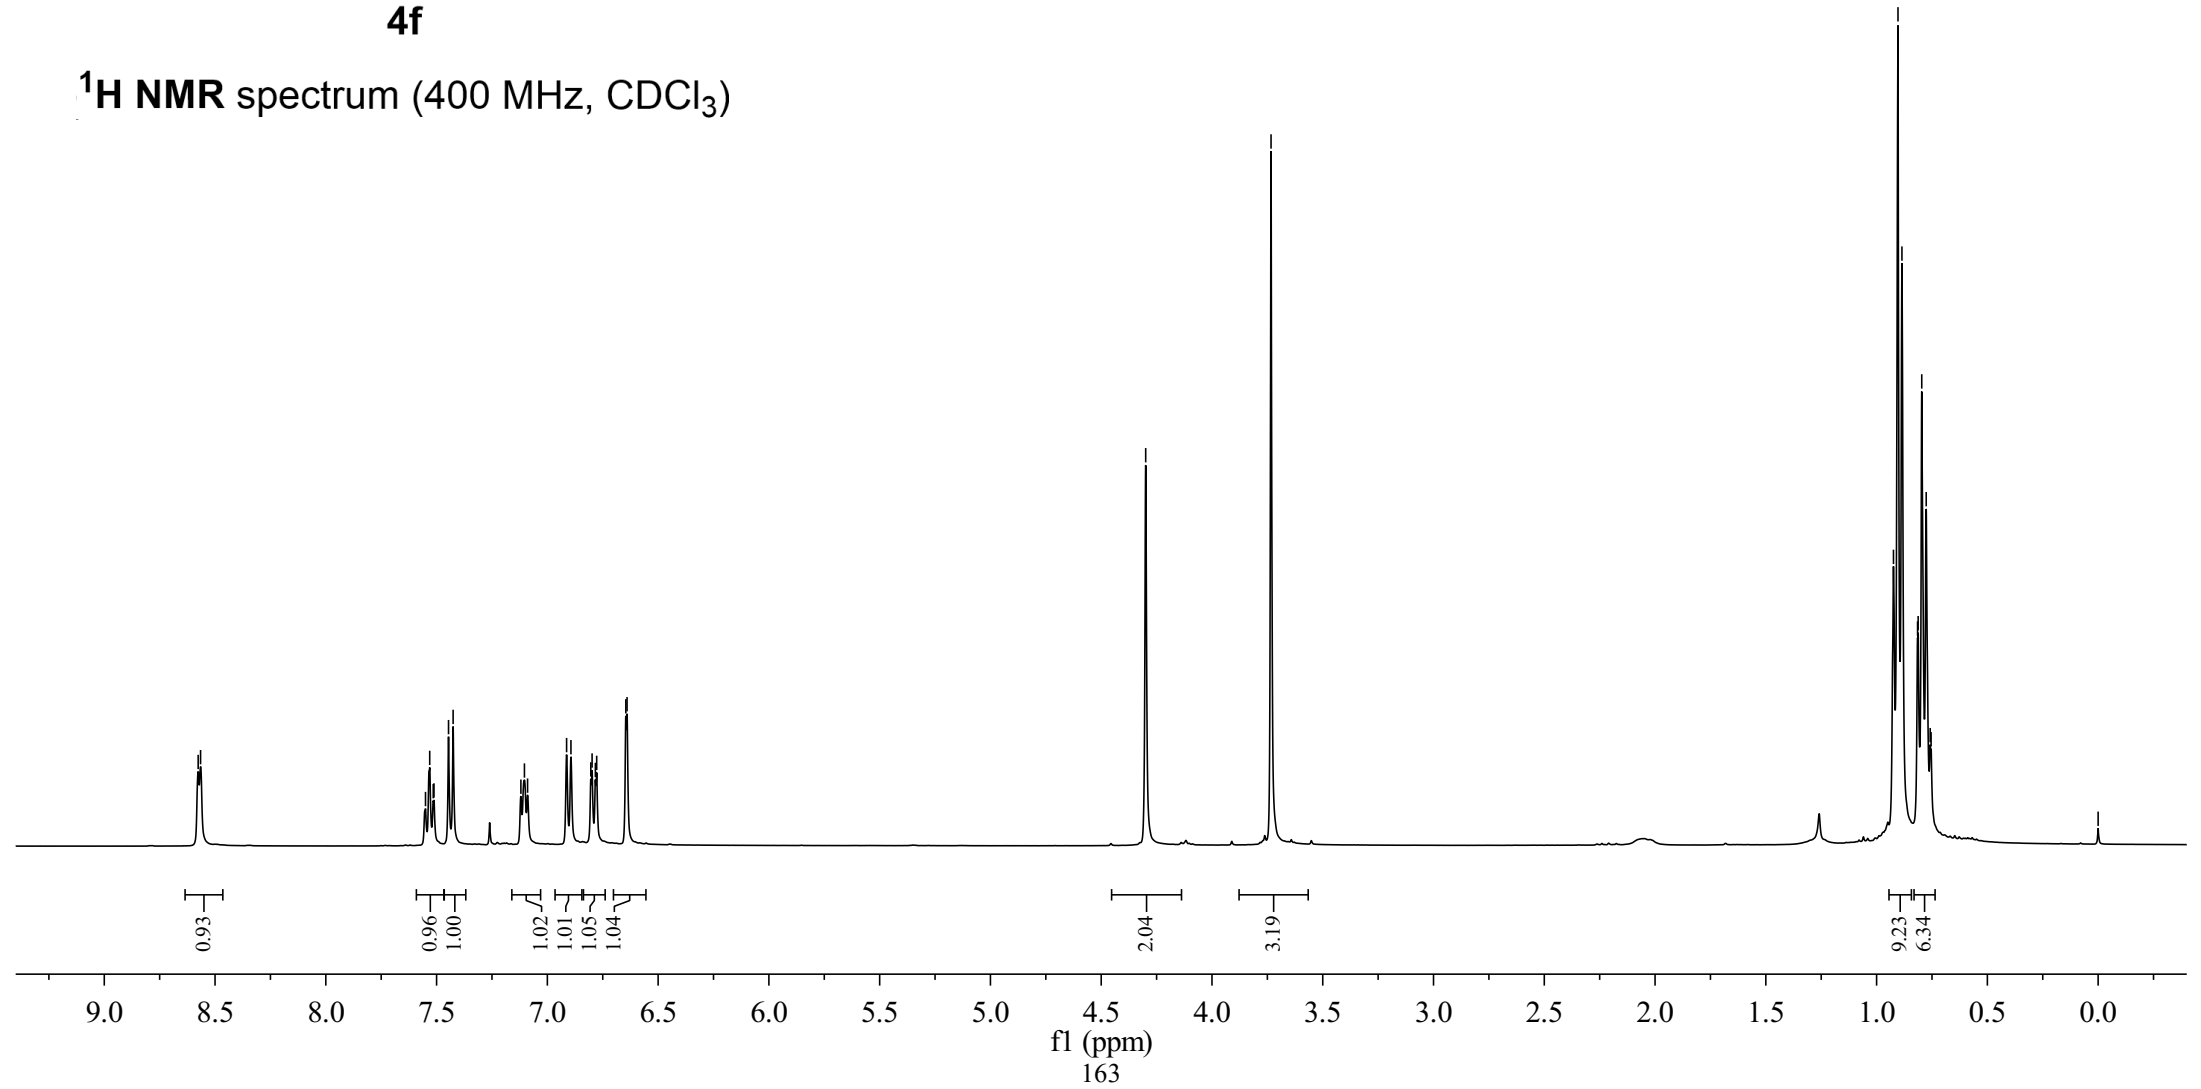

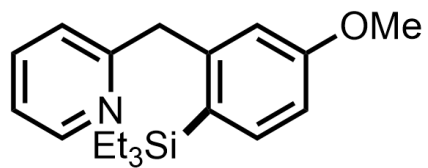

4f

<sup>13</sup>C NMR spectrum (100 MHz, CDCl<sub>3</sub>)

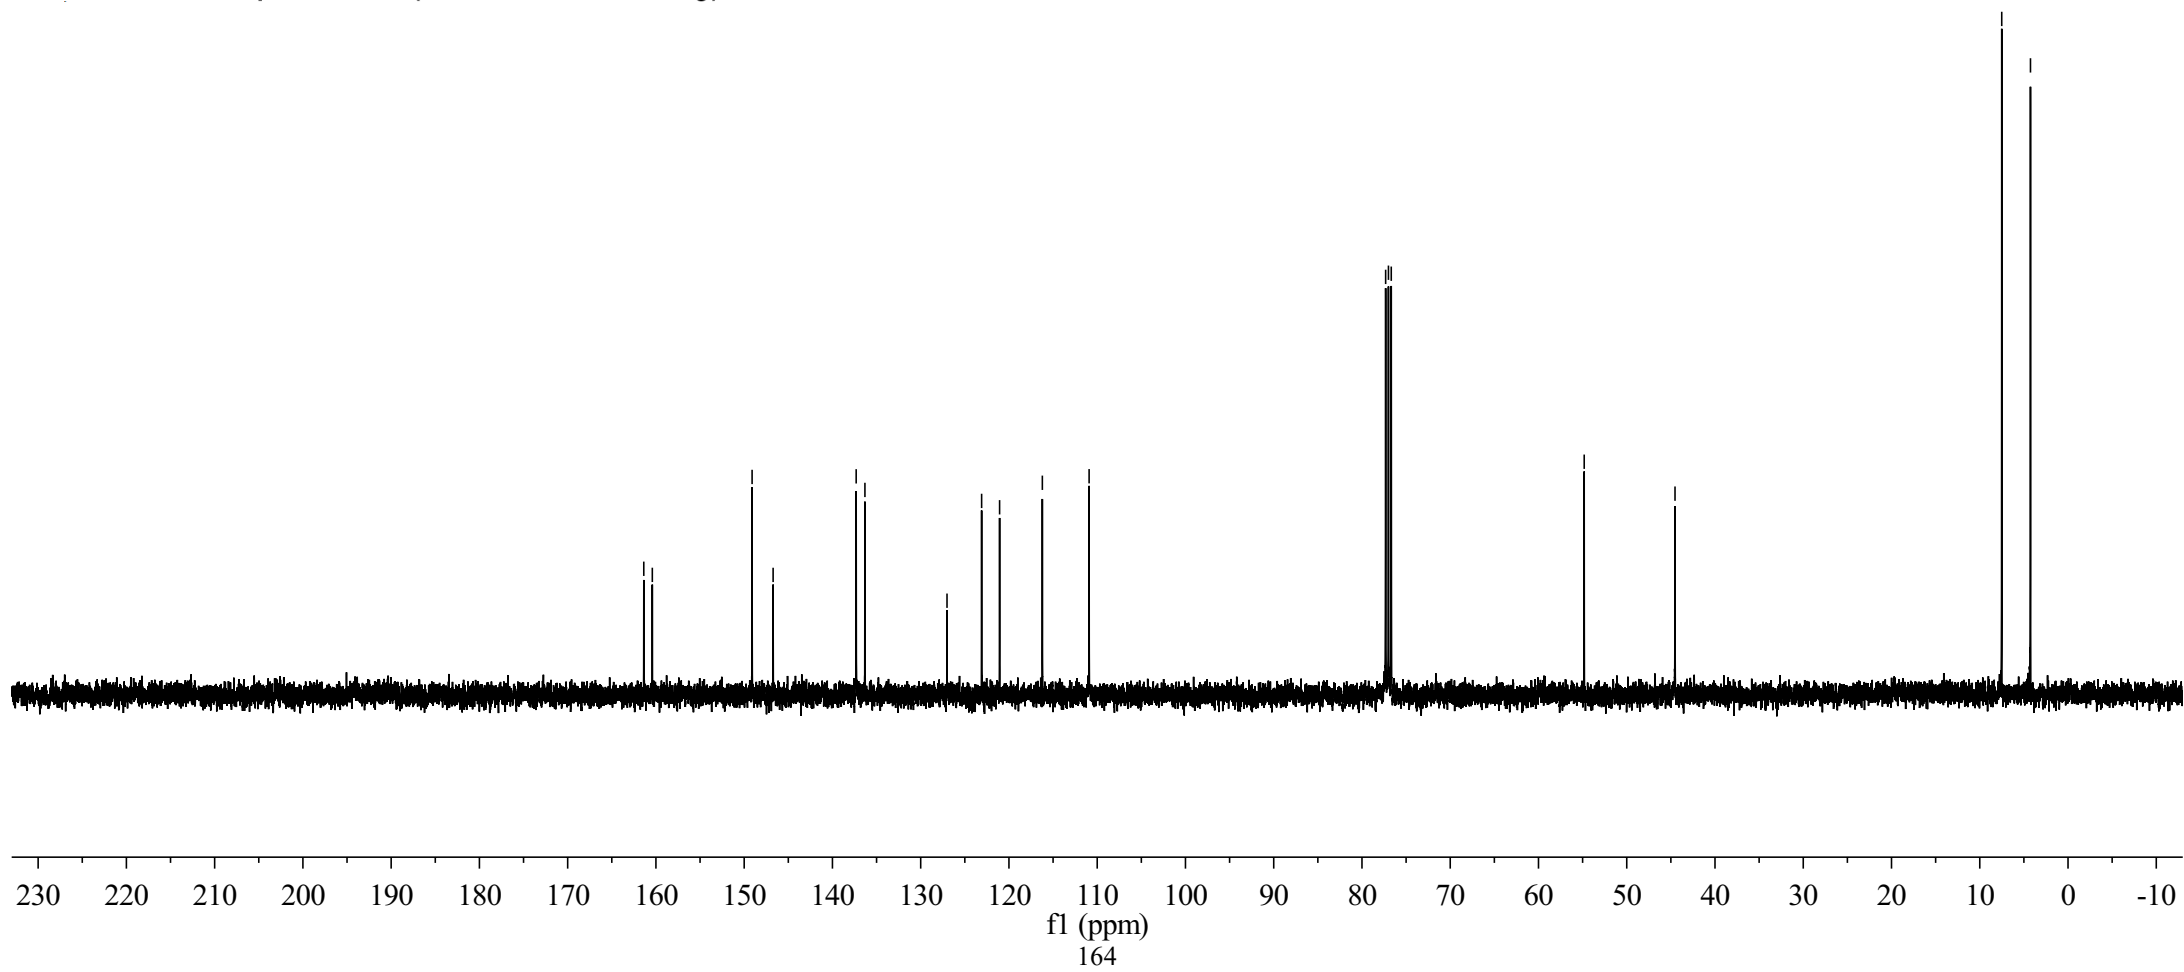

8.55  
8.54  
8.53  
7.44  
7.43  
7.31  
7.29  
7.27  
7.26  
7.14  
7.13  
7.13  
7.06  
7.04  
7.04  
6.95  
6.88  
6.83  
6.63

4.35

3.67

0.87  
0.87  
0.85  
0.84  
0.83  
0.77  
0.77  
0.76  
0.75  
0.74  
0.73  
0.72  
-0.00

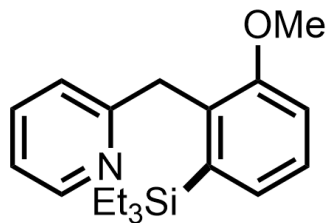

**4g**

<sup>1</sup>H NMR spectrum (400 MHz, CDCl<sub>3</sub>)

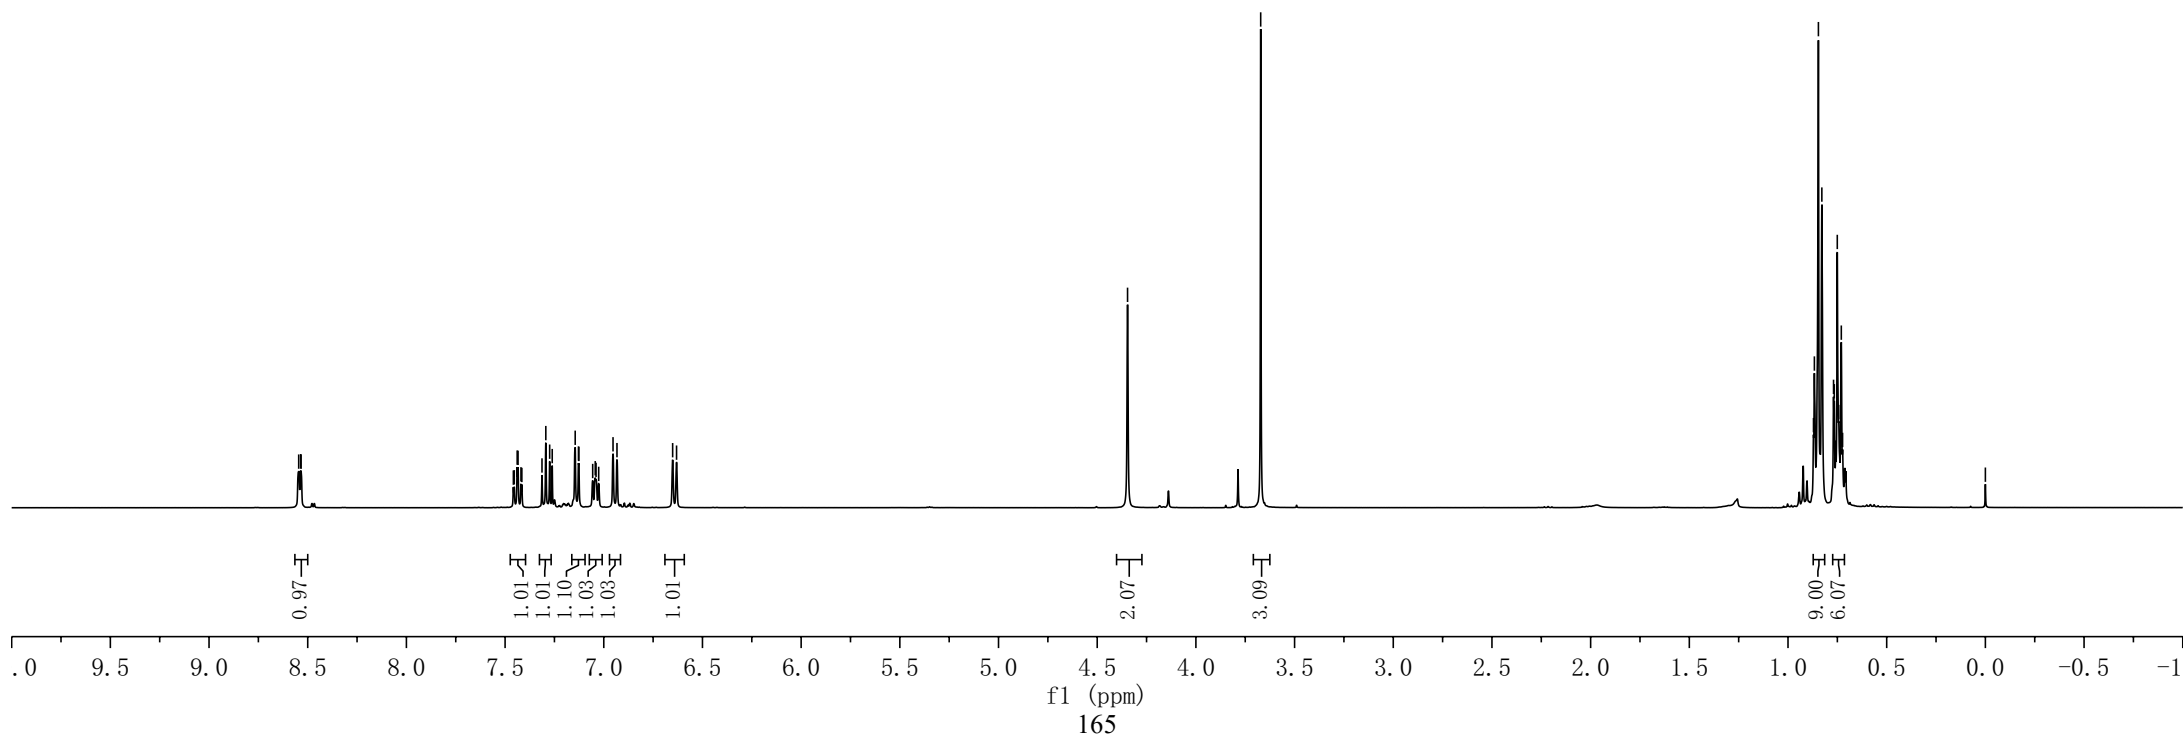

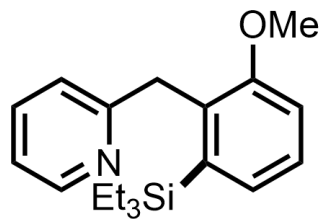

4g

<sup>13</sup>C NMR spectrum (100 MHz, CDCl<sub>3</sub>)

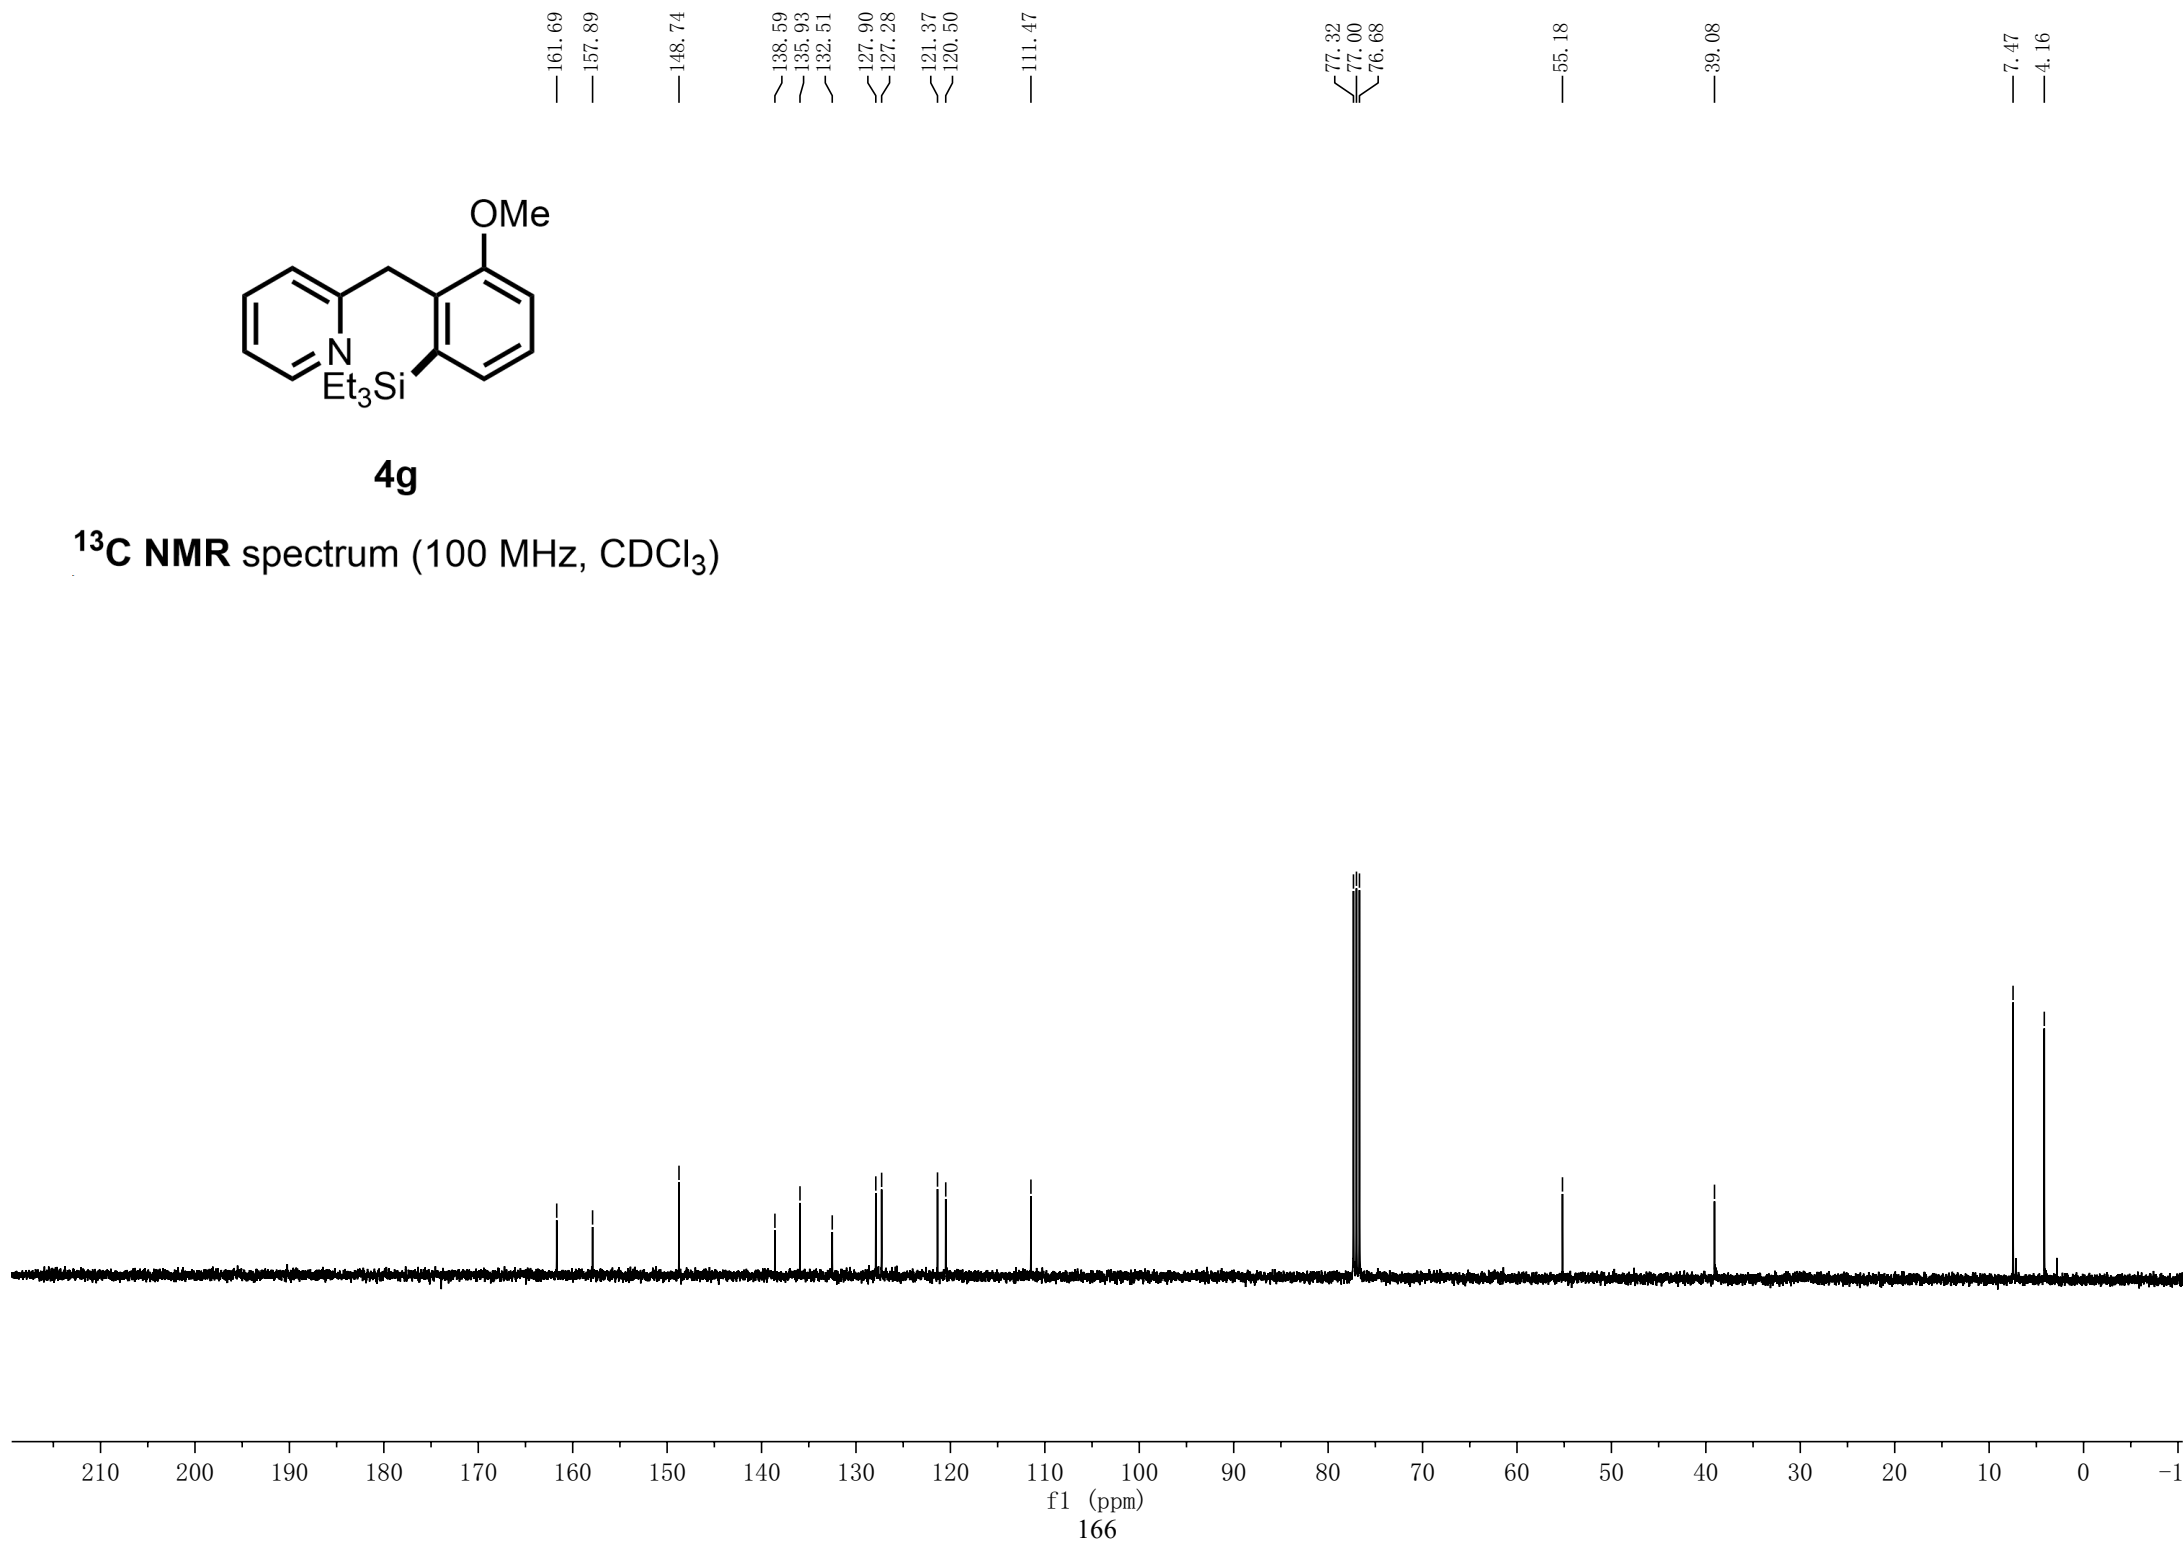

8.11  
8.11  
8.10  
8.10  
7.56  
7.55  
7.53  
7.52  
7.51  
7.42  
7.42  
7.40  
7.40  
7.29  
7.29  
7.27  
7.27  
7.25  
7.25  
7.09  
7.08  
7.07  
7.06  
7.06  
6.94  
6.92  
6.86  
6.85  
6.84  
6.83  
6.75  
6.73

0.84  
0.82  
0.80  
0.71  
0.69  
0.67  
0.65  
0.00

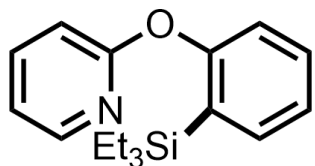

**4h**

<sup>1</sup>H NMR spectrum (400 MHz, CDCl<sub>3</sub>)

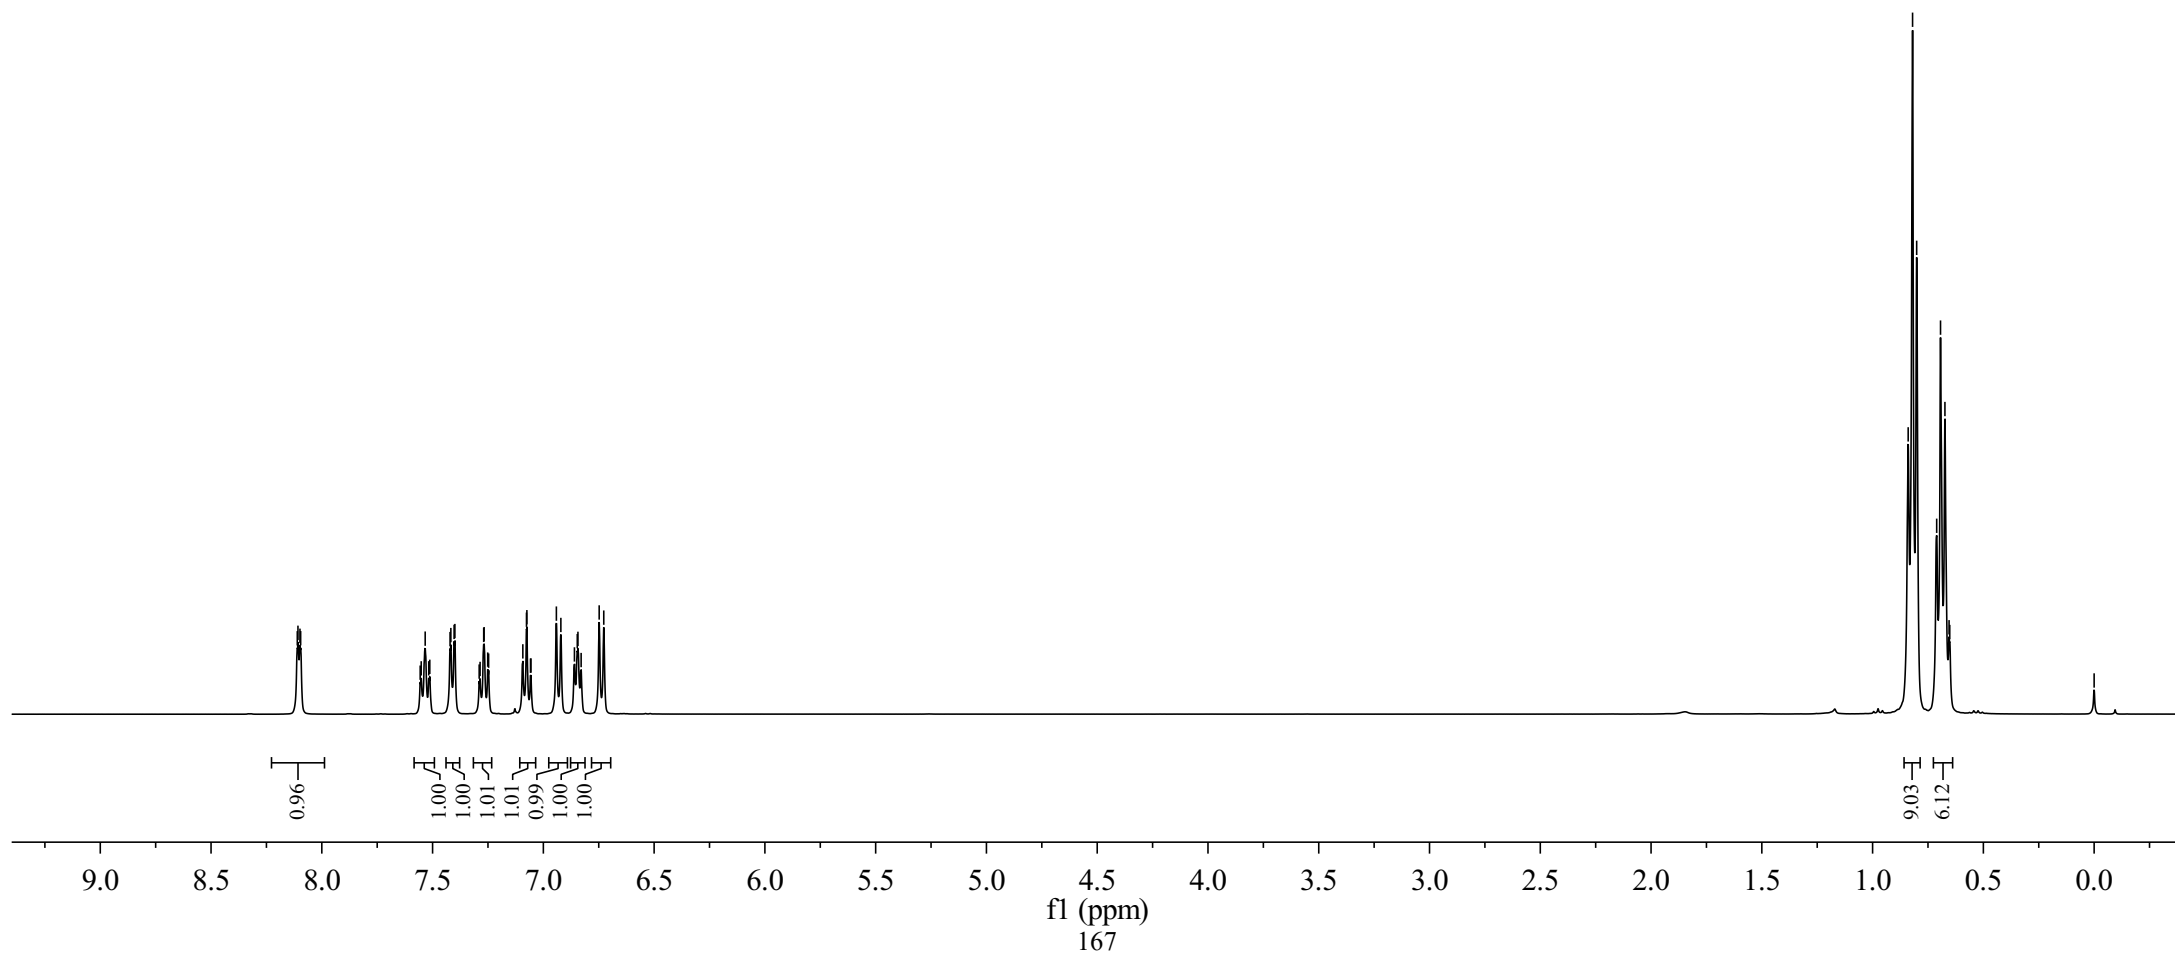

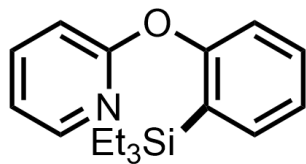

**4h**

**$^{13}\text{C}$  NMR spectrum (100 MHz,  $\text{CDCl}_3$ )**

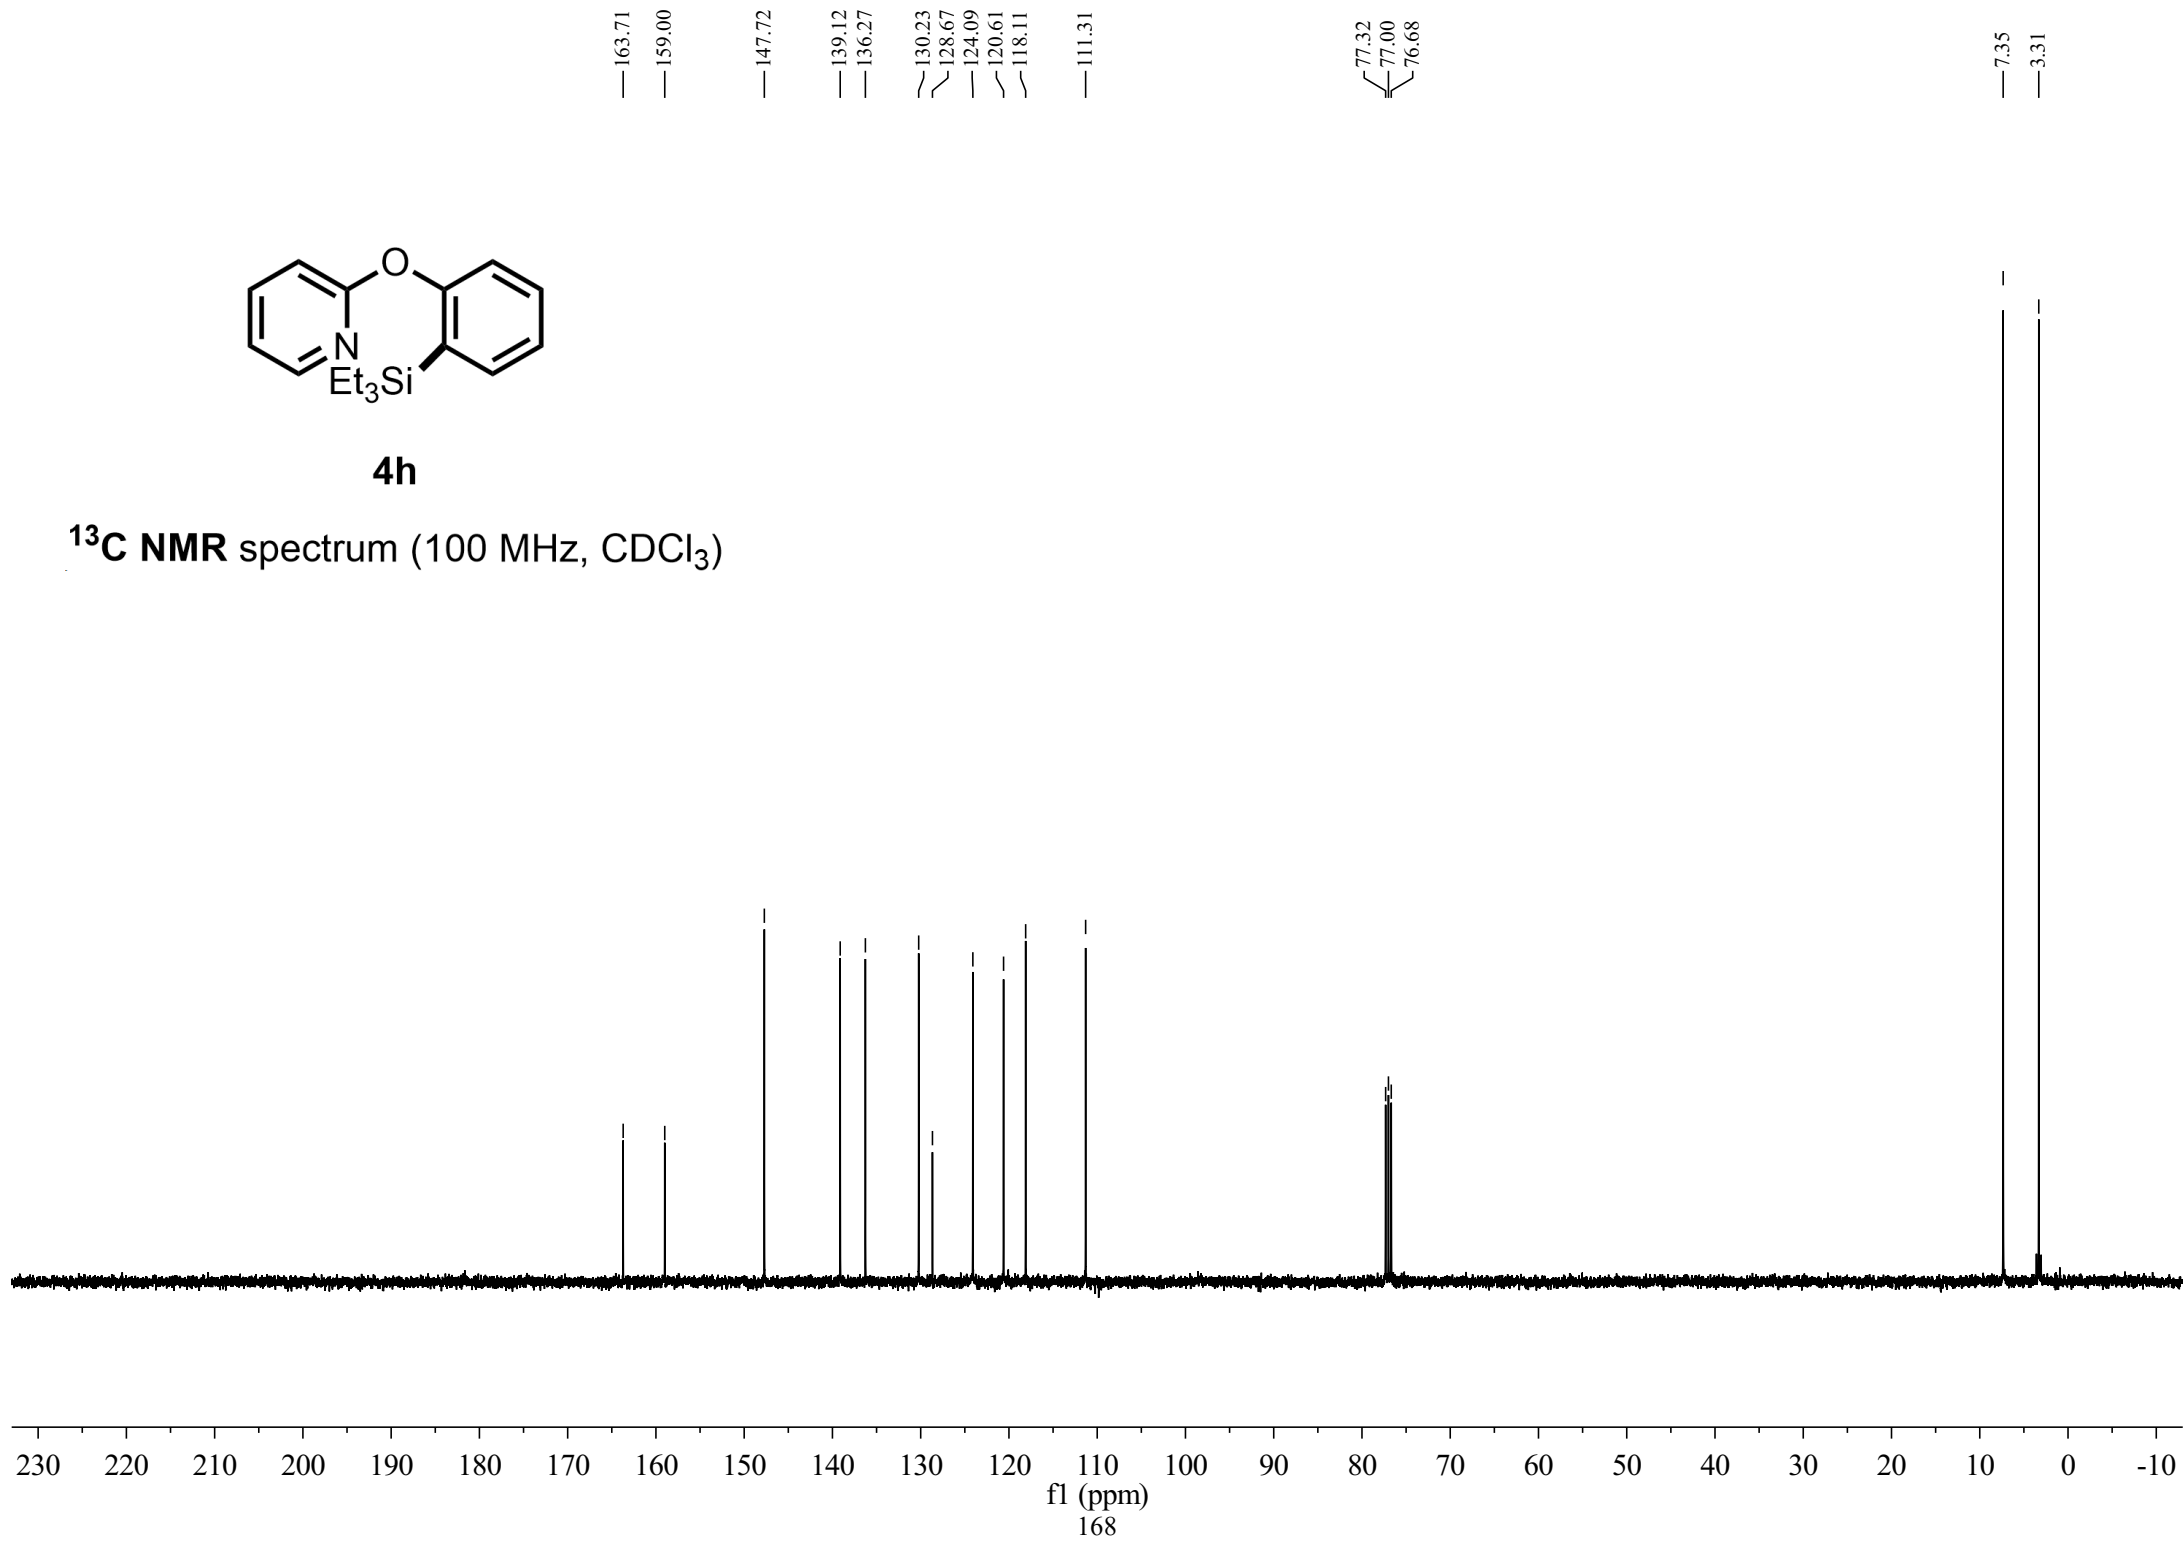



8.60  
8.59  
7.74  
7.59  
7.59  
7.57  
7.57  
7.55  
7.55  
7.54  
7.52  
7.20  
7.18  
7.14  
6.90  
6.88

0.95  
0.95  
0.94  
0.93  
0.91  
0.89  
0.87  
0.86  
0.85

-0.00

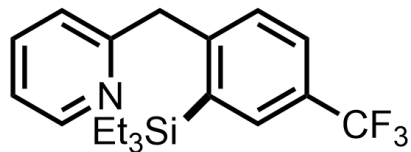

**4i**

<sup>1</sup>H NMR spectrum (400 MHz, CDCl<sub>3</sub>)

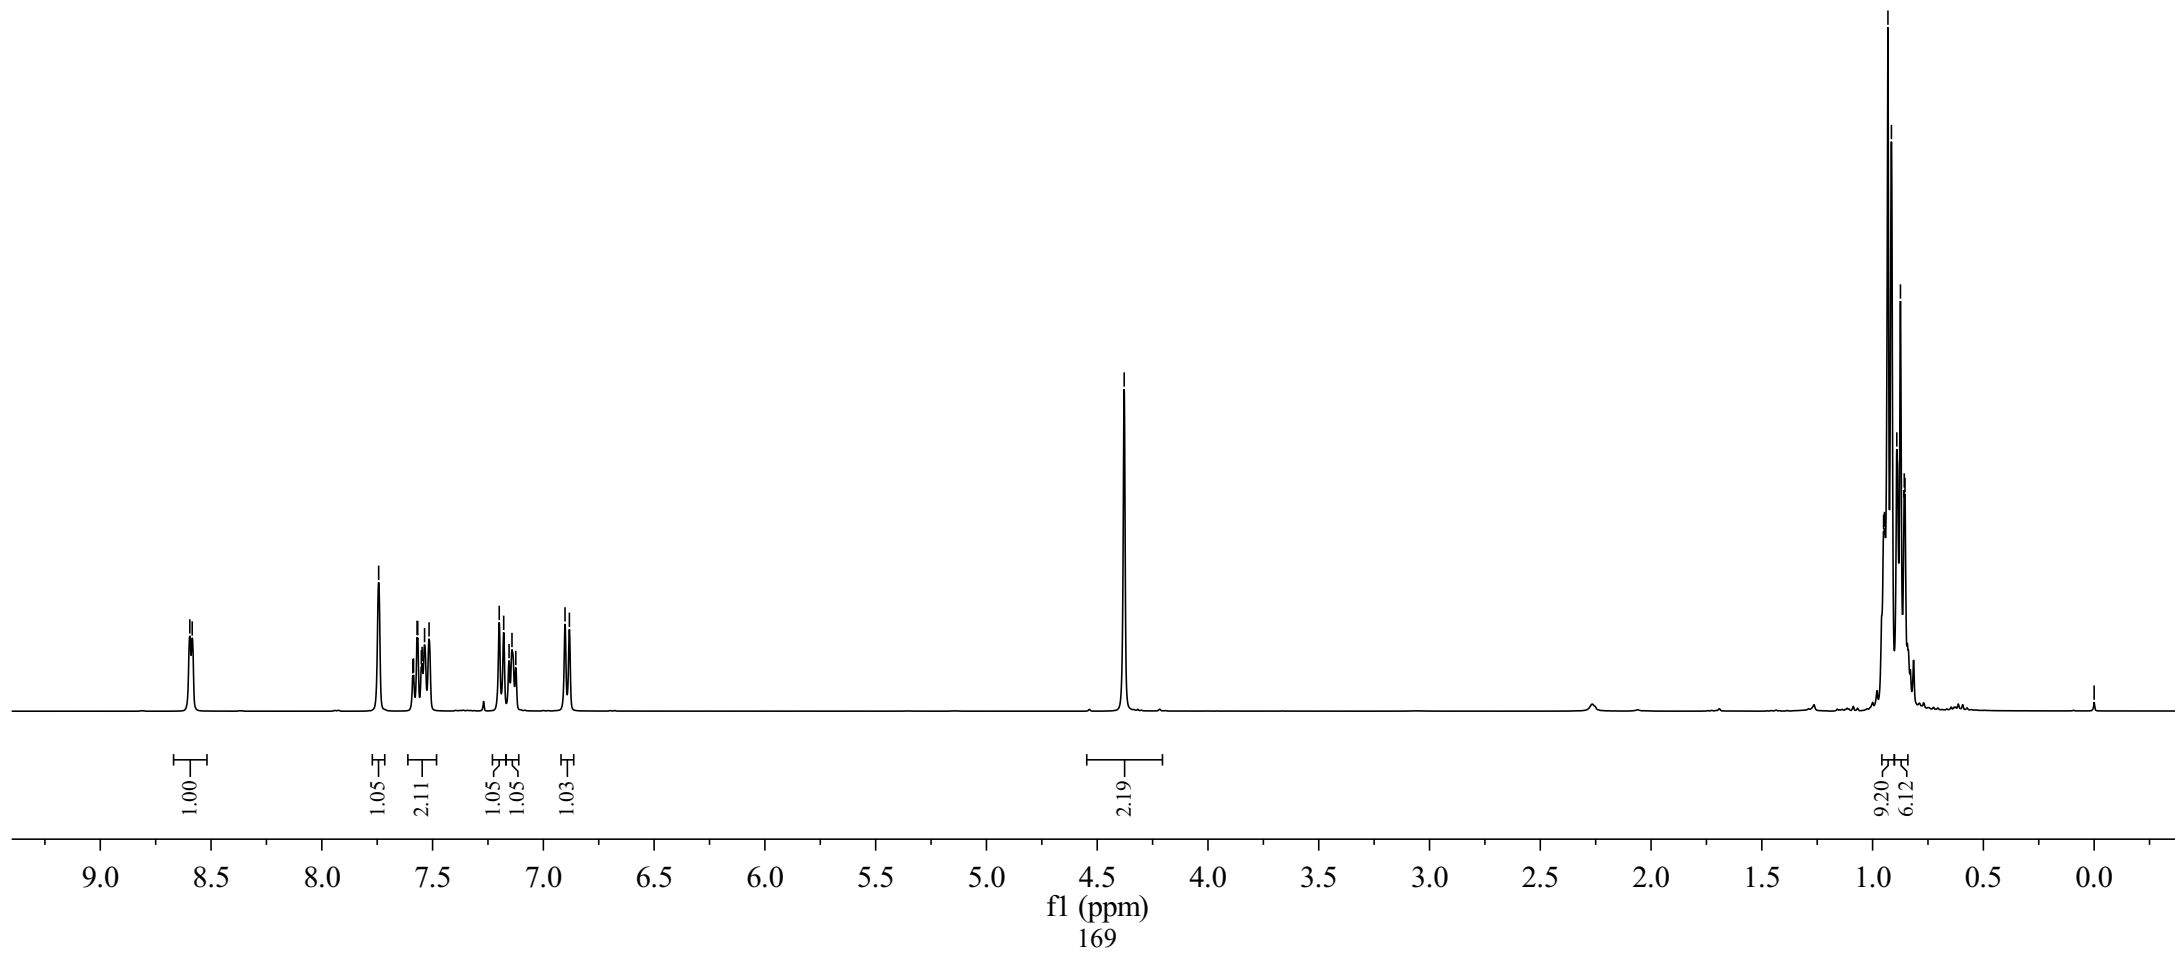

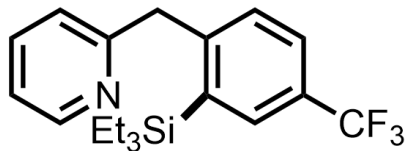

**4i**

<sup>13</sup>C NMR spectrum (100 MHz, CDCl<sub>3</sub>)

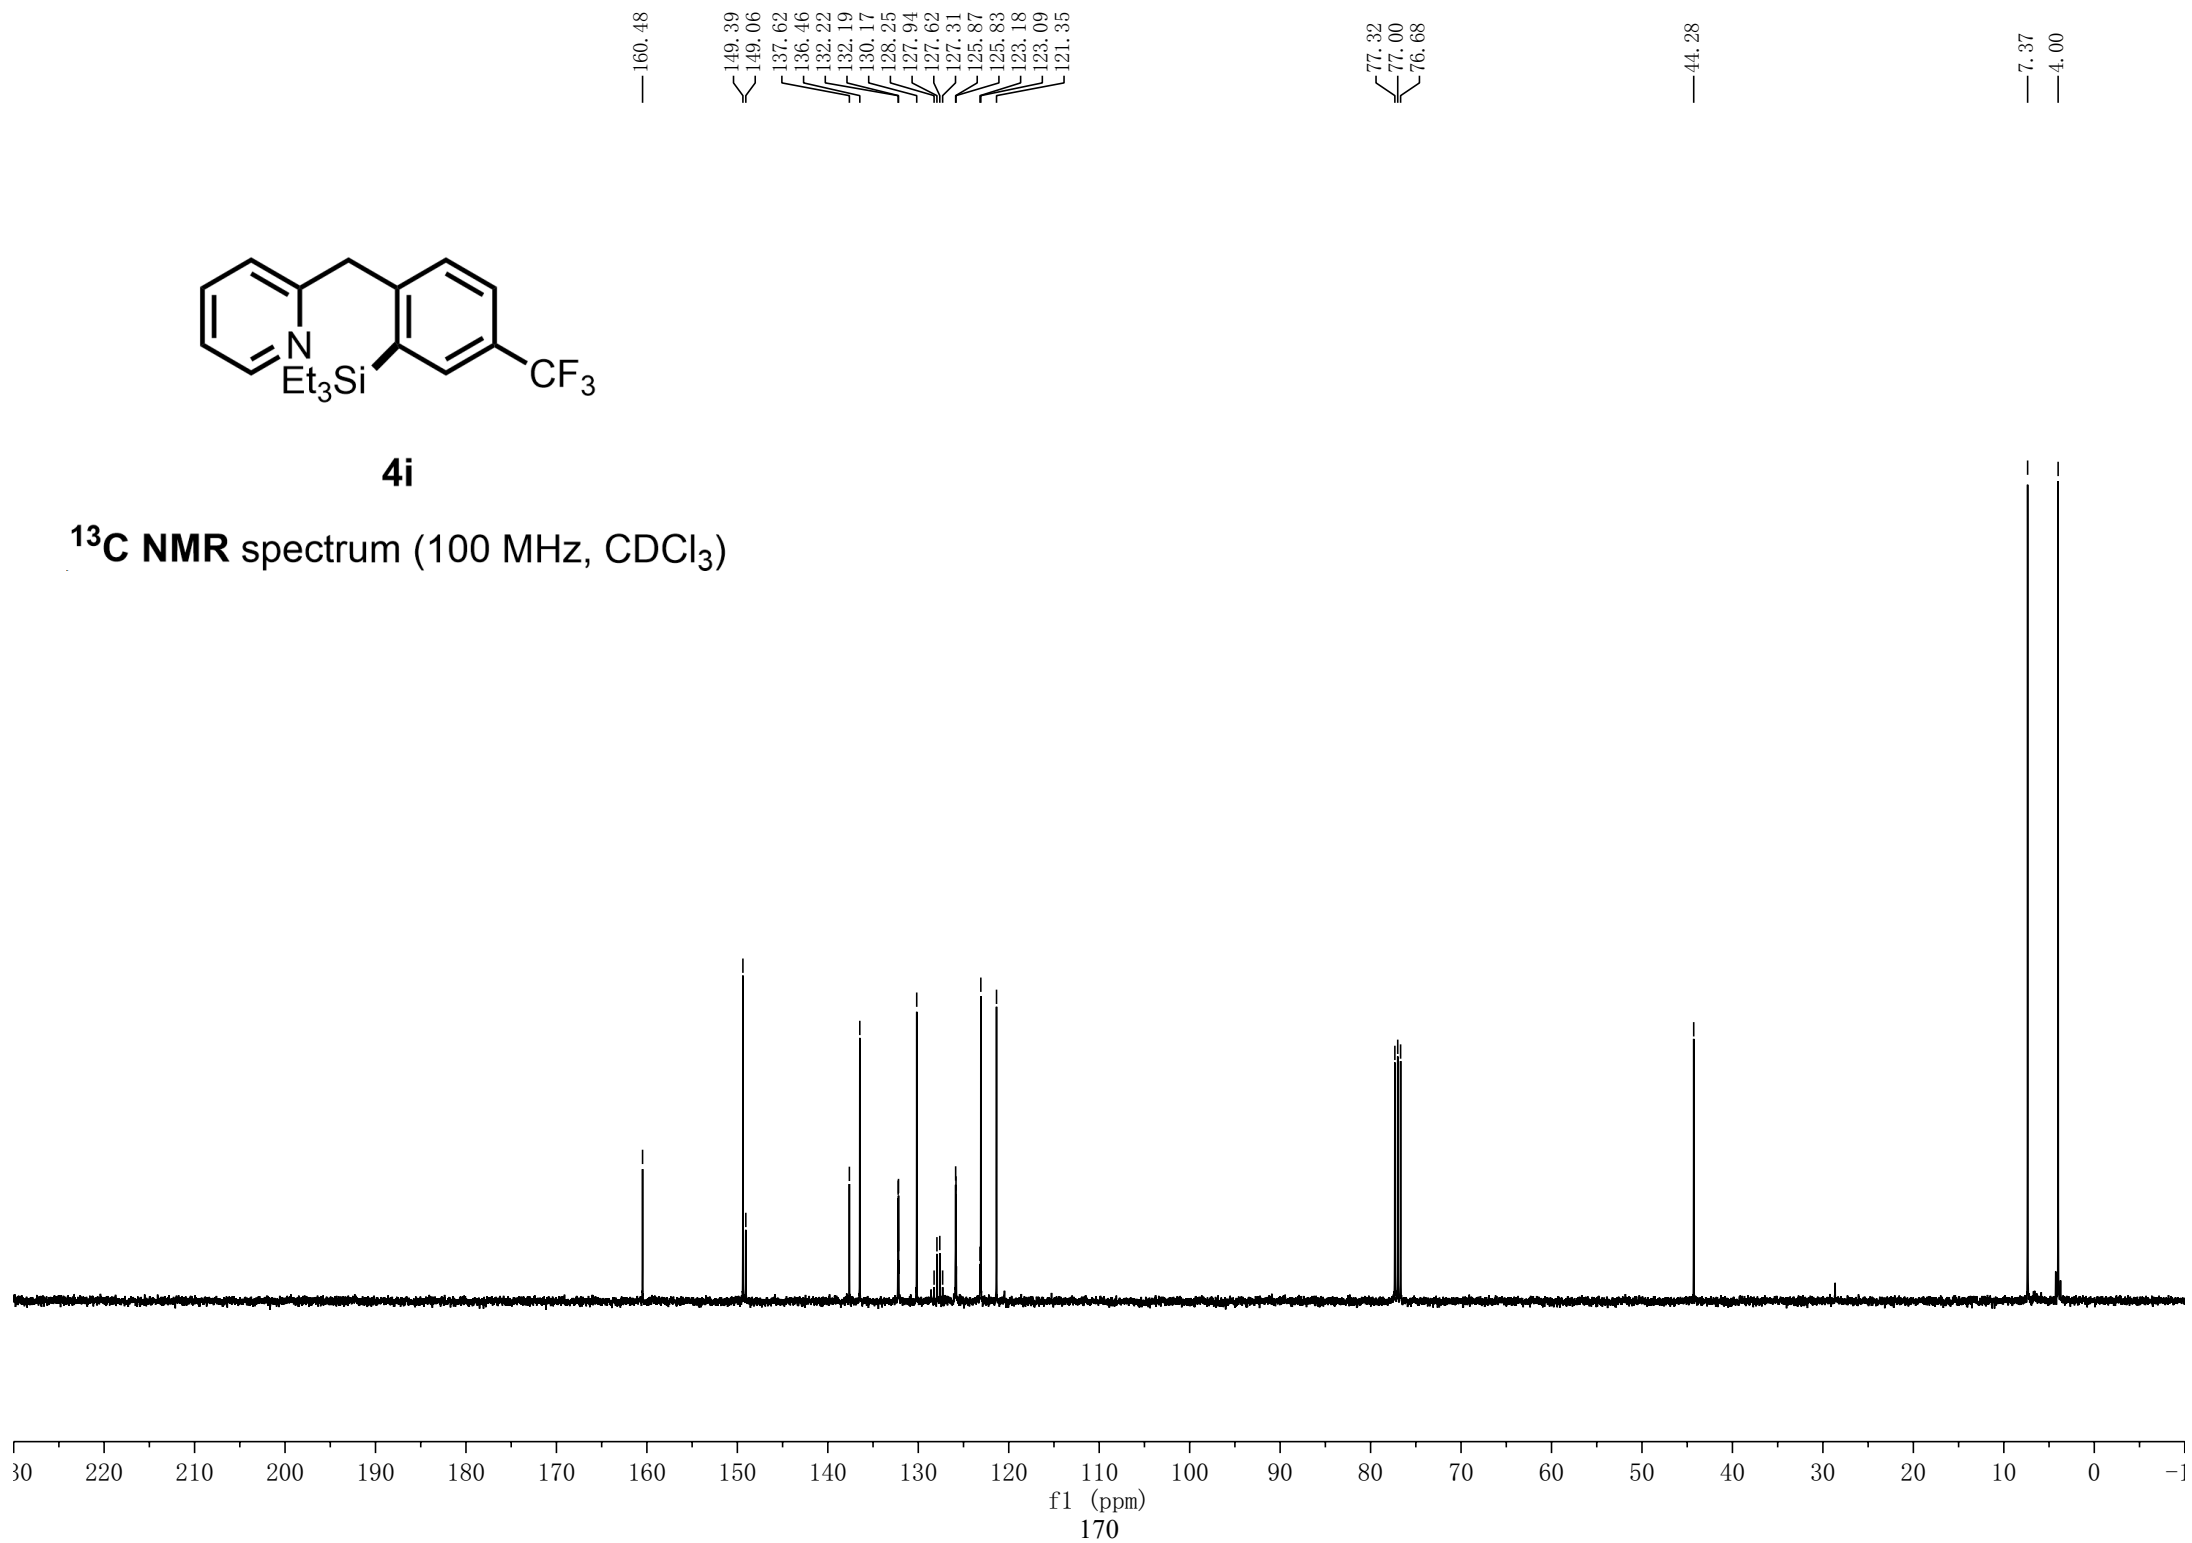

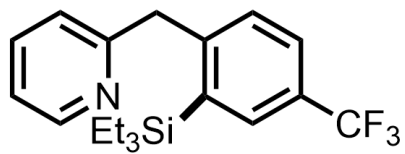

4i

<sup>19</sup>F NMR spectrum (376 MHz, CDCl<sub>3</sub>)

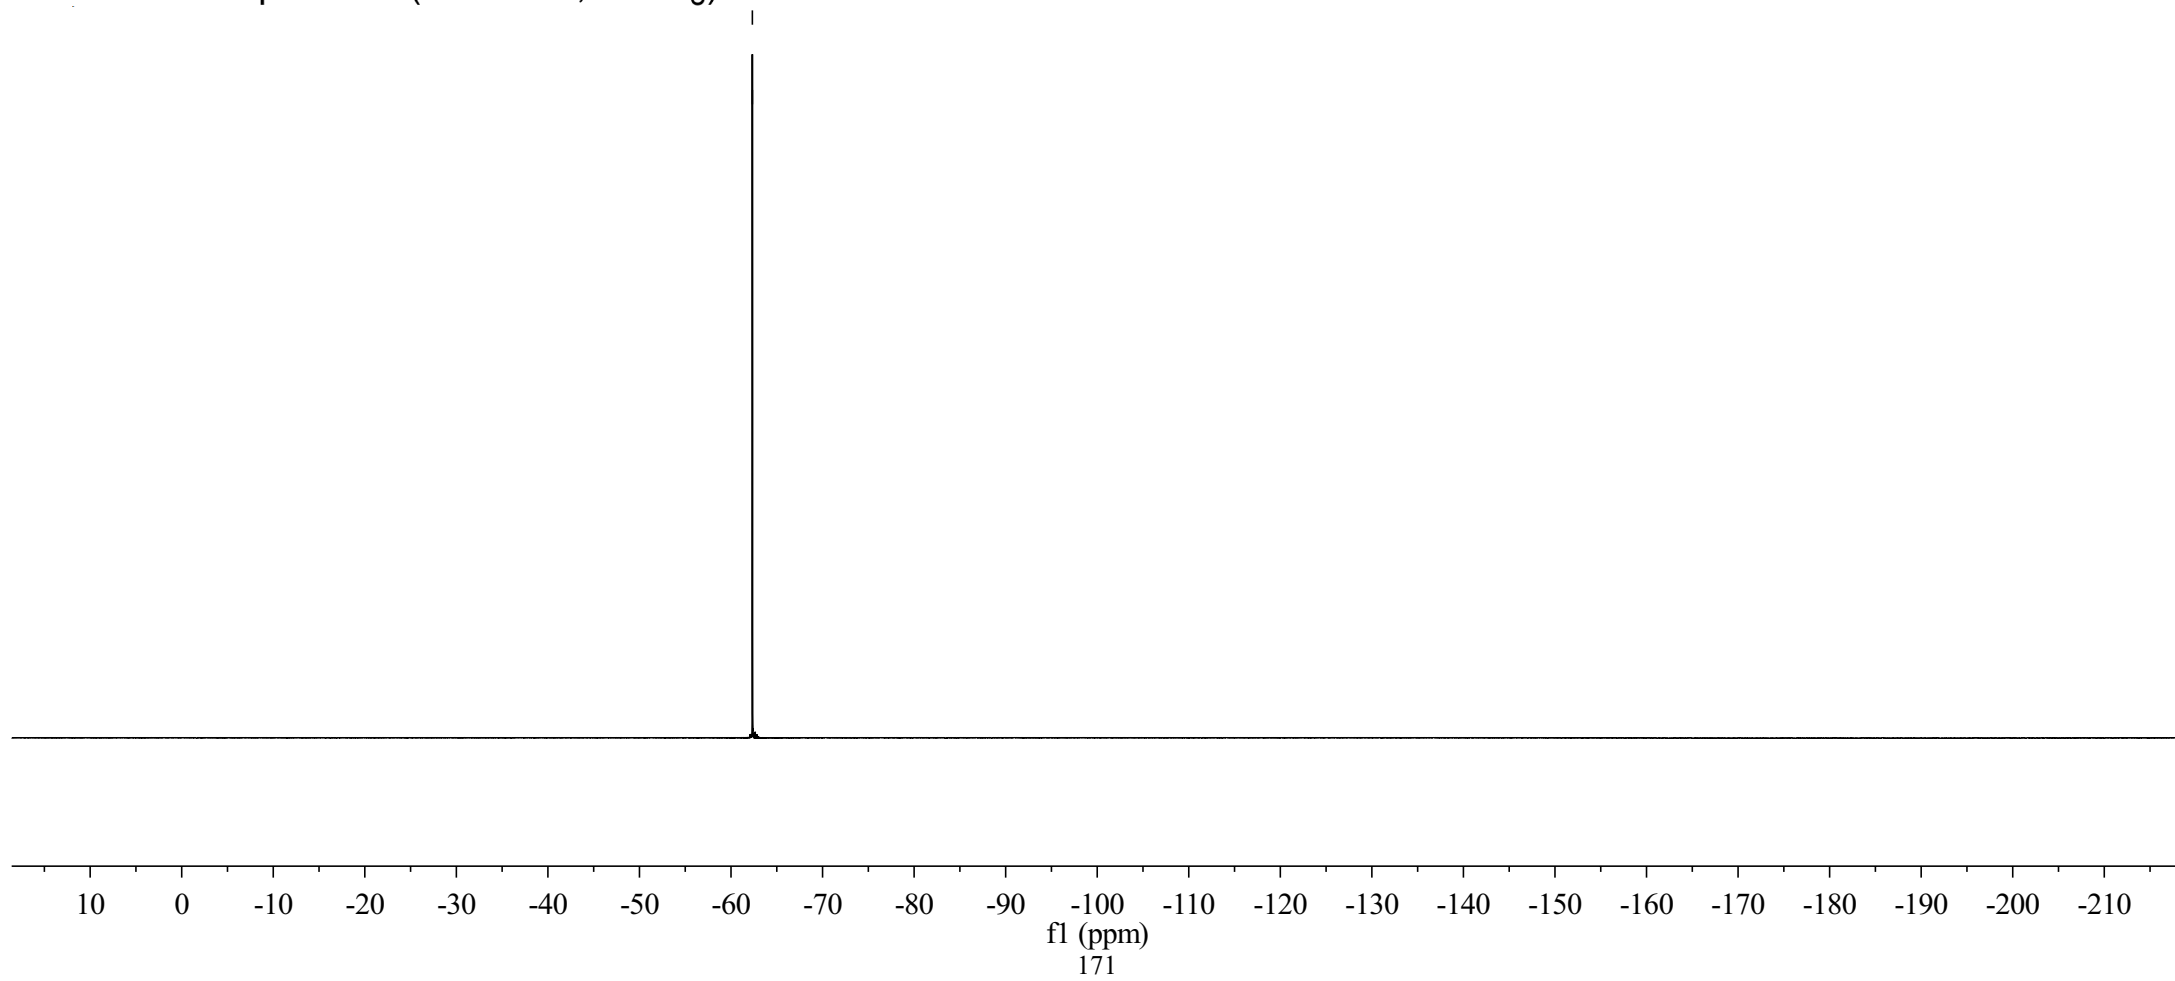

8.60  
8.59  
7.65  
7.63  
7.57  
7.57  
7.55  
7.48  
7.46  
7.33  
7.16  
7.15  
7.13  
6.87  
6.85

4.38

0.93  
0.93  
0.91  
0.90  
0.87  
0.85  
0.83

-0.00

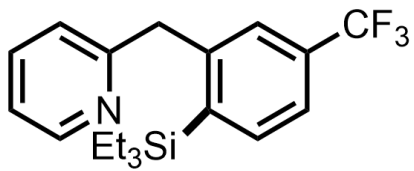

4j

<sup>1</sup>H NMR spectrum (400 MHz, CDCl<sub>3</sub>)

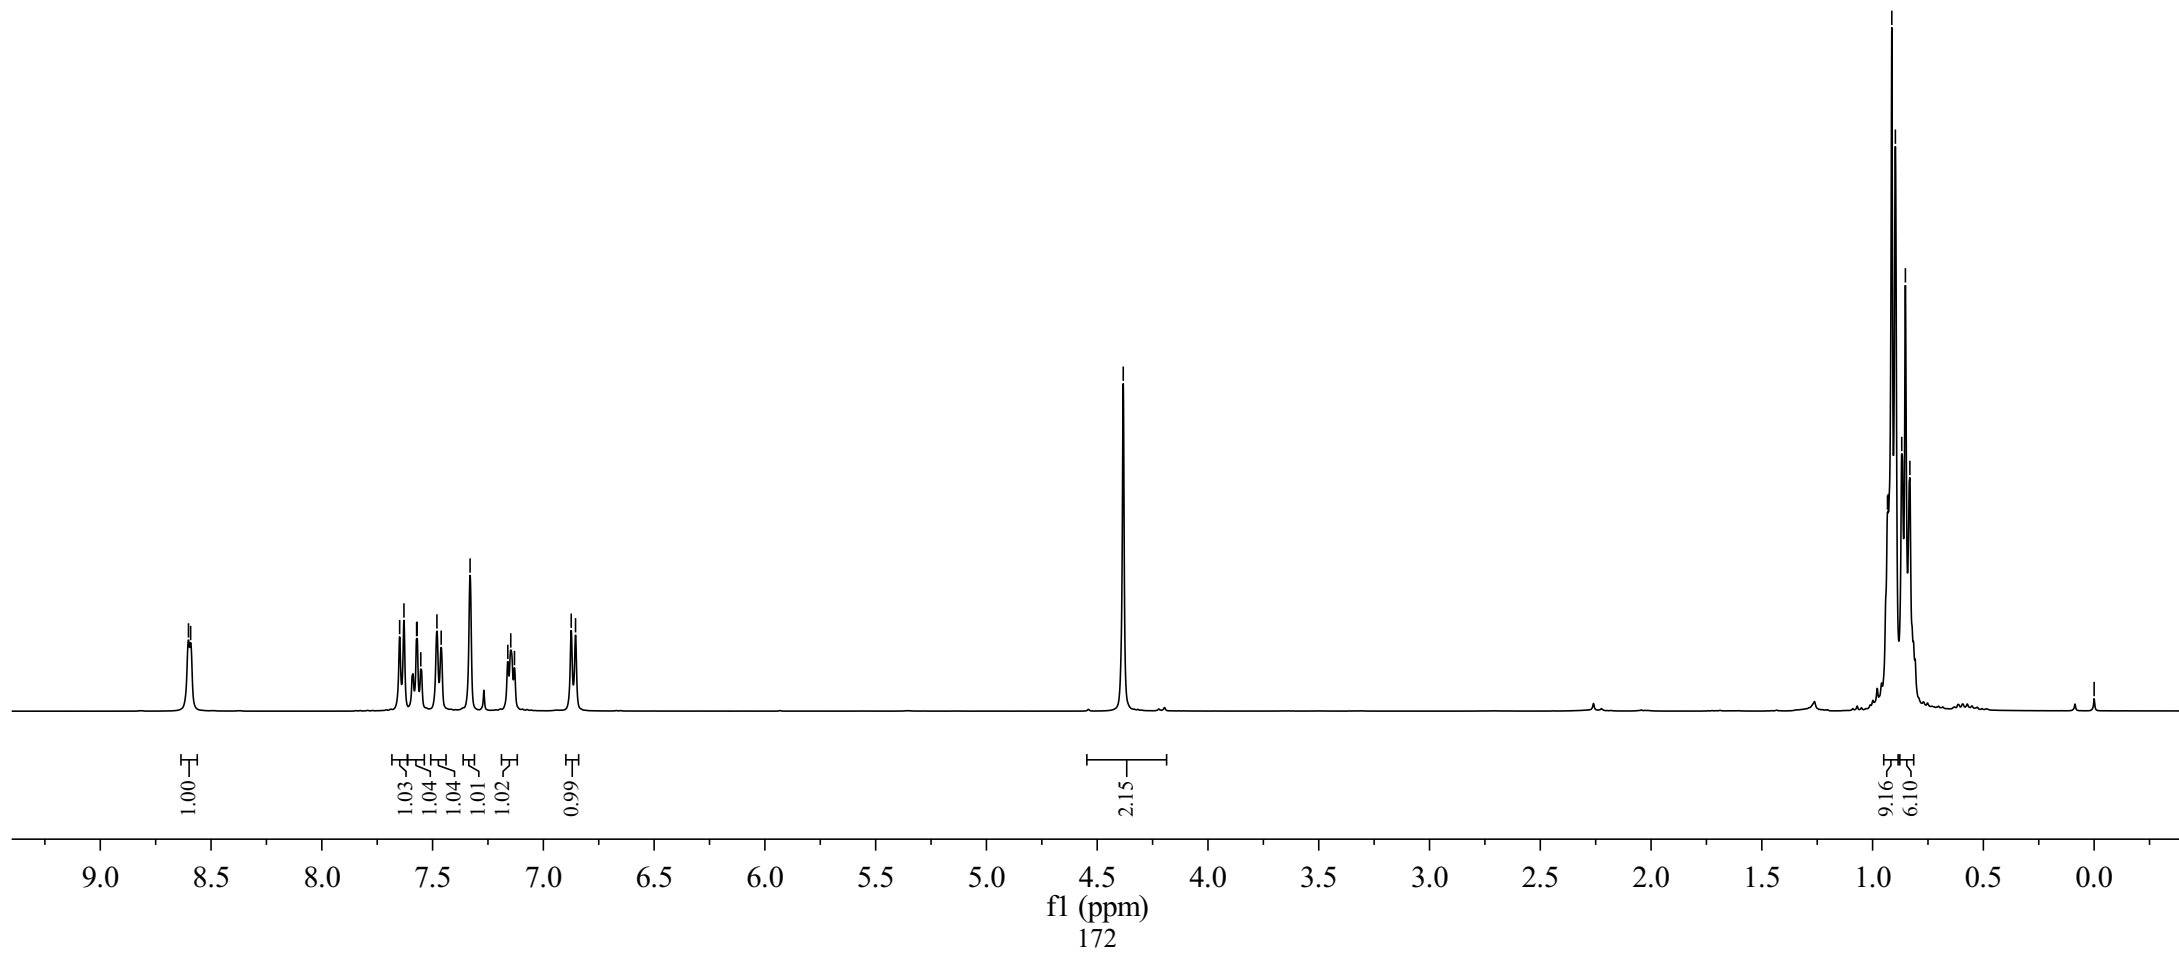

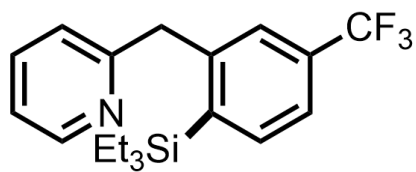

4j

<sup>13</sup>C NMR spectrum (100 MHz, CDCl<sub>3</sub>)

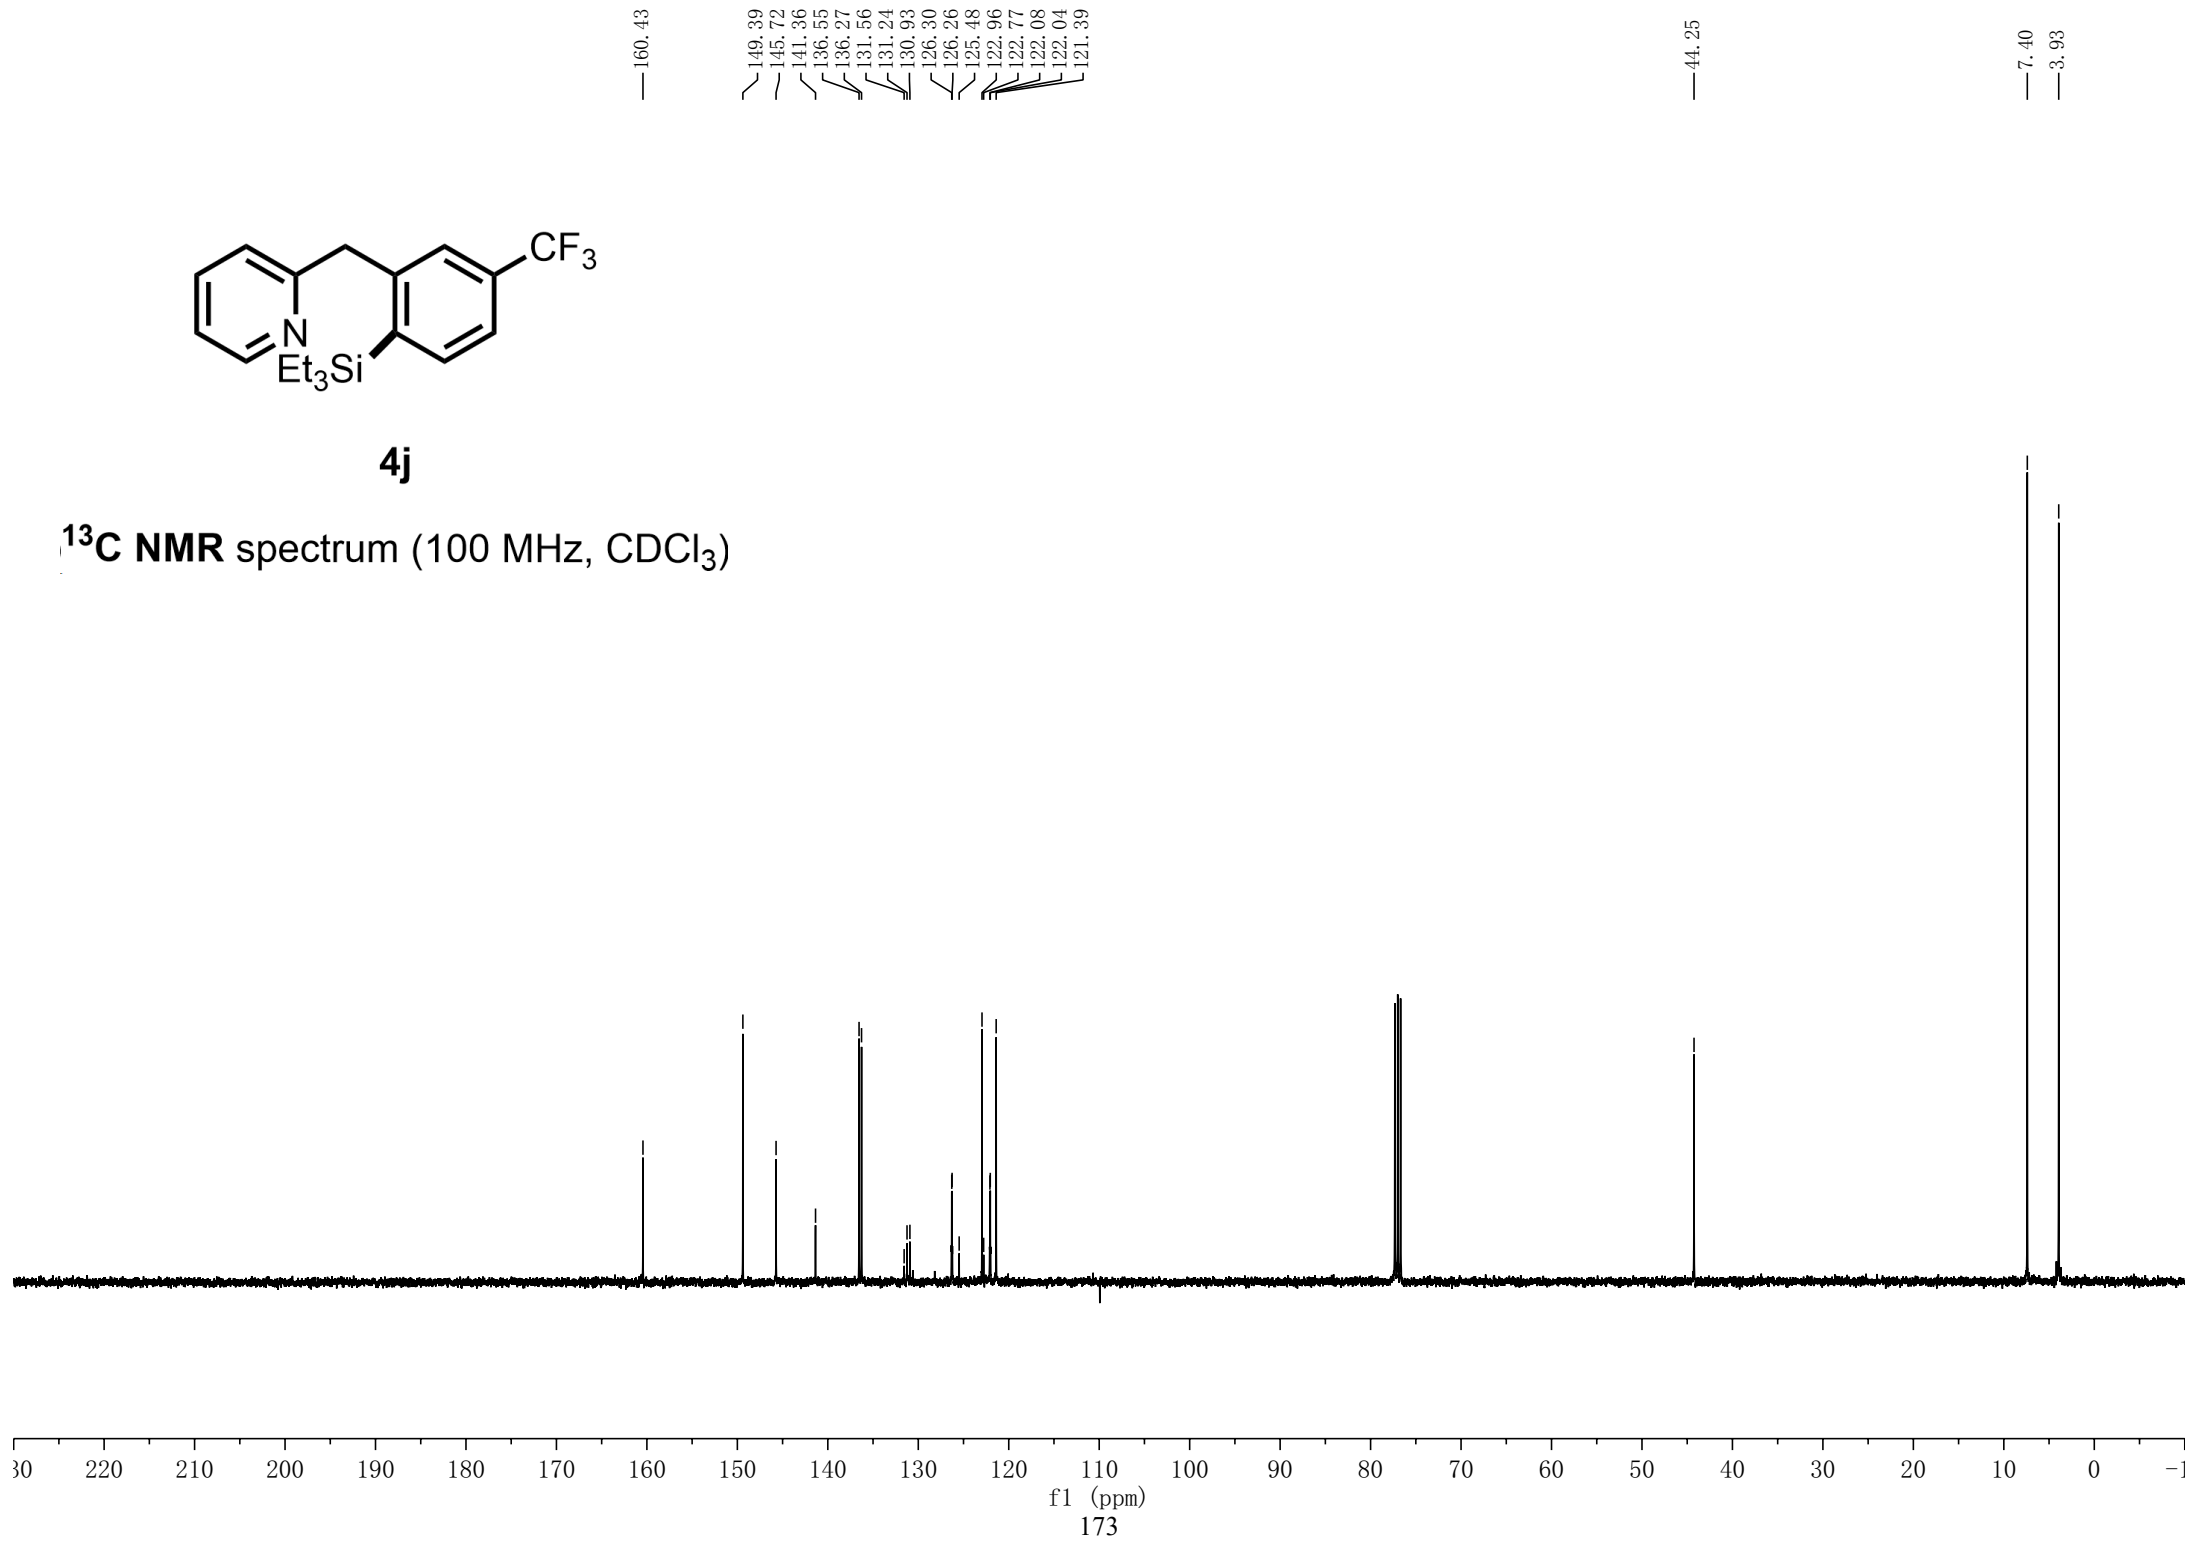

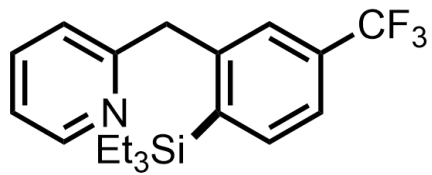

4j

<sup>19</sup>F NMR spectrum (376 MHz, CDCl<sub>3</sub>)

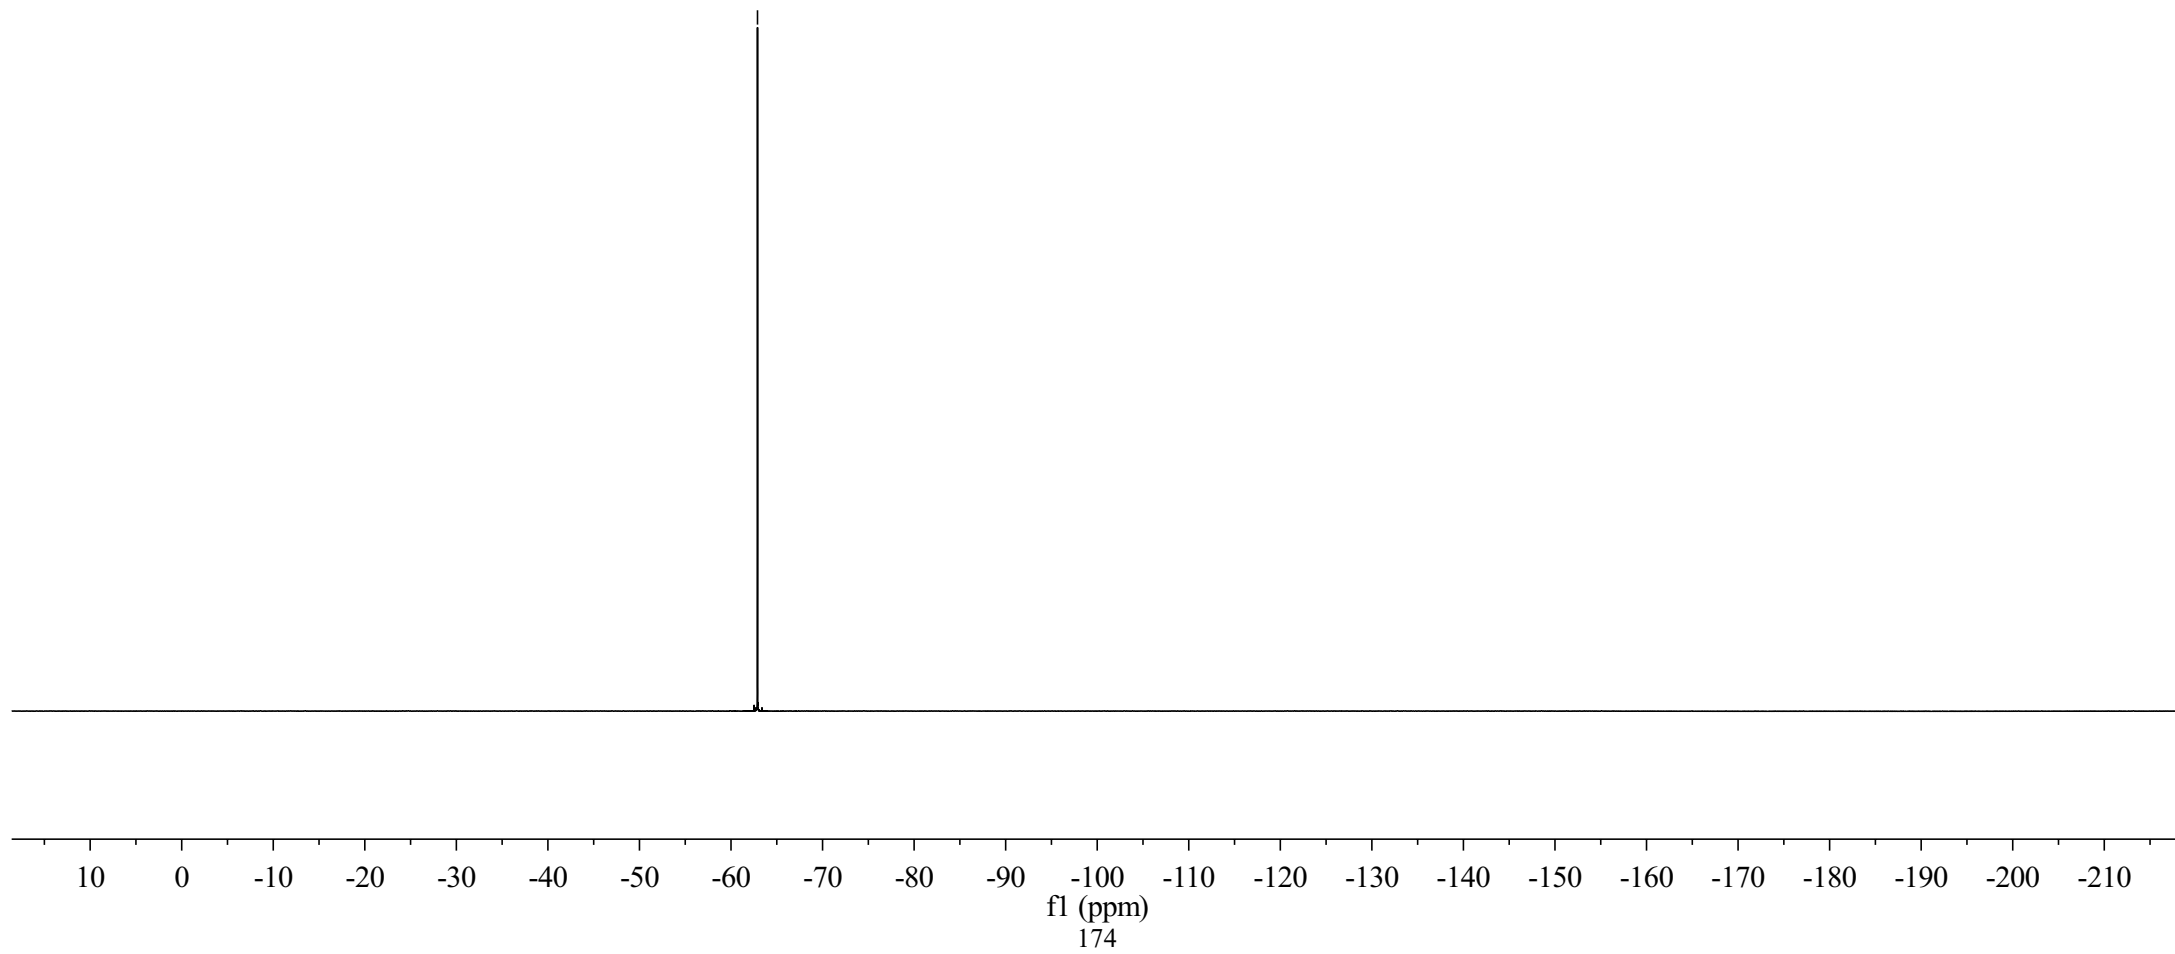

8.58  
8.57  
8.57  
8.57  
7.57  
7.56  
7.55  
7.54  
7.53  
7.53  
7.21  
7.20  
7.19  
7.18  
7.18  
7.13  
7.12  
7.11  
7.10  
7.07  
7.05  
7.05  
7.03  
6.99  
6.99  
6.97  
6.96  
6.95  
6.94  
6.88  
6.86

4.29

0.93  
0.93  
0.92  
0.91  
0.90  
0.89  
0.84  
0.83  
0.82  
0.81  
0.80  
0.80  
0.79  
0.78  
0.77  
0.00

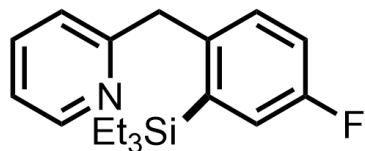

4k

<sup>1</sup>H NMR spectrum (400 MHz, CDCl<sub>3</sub>)

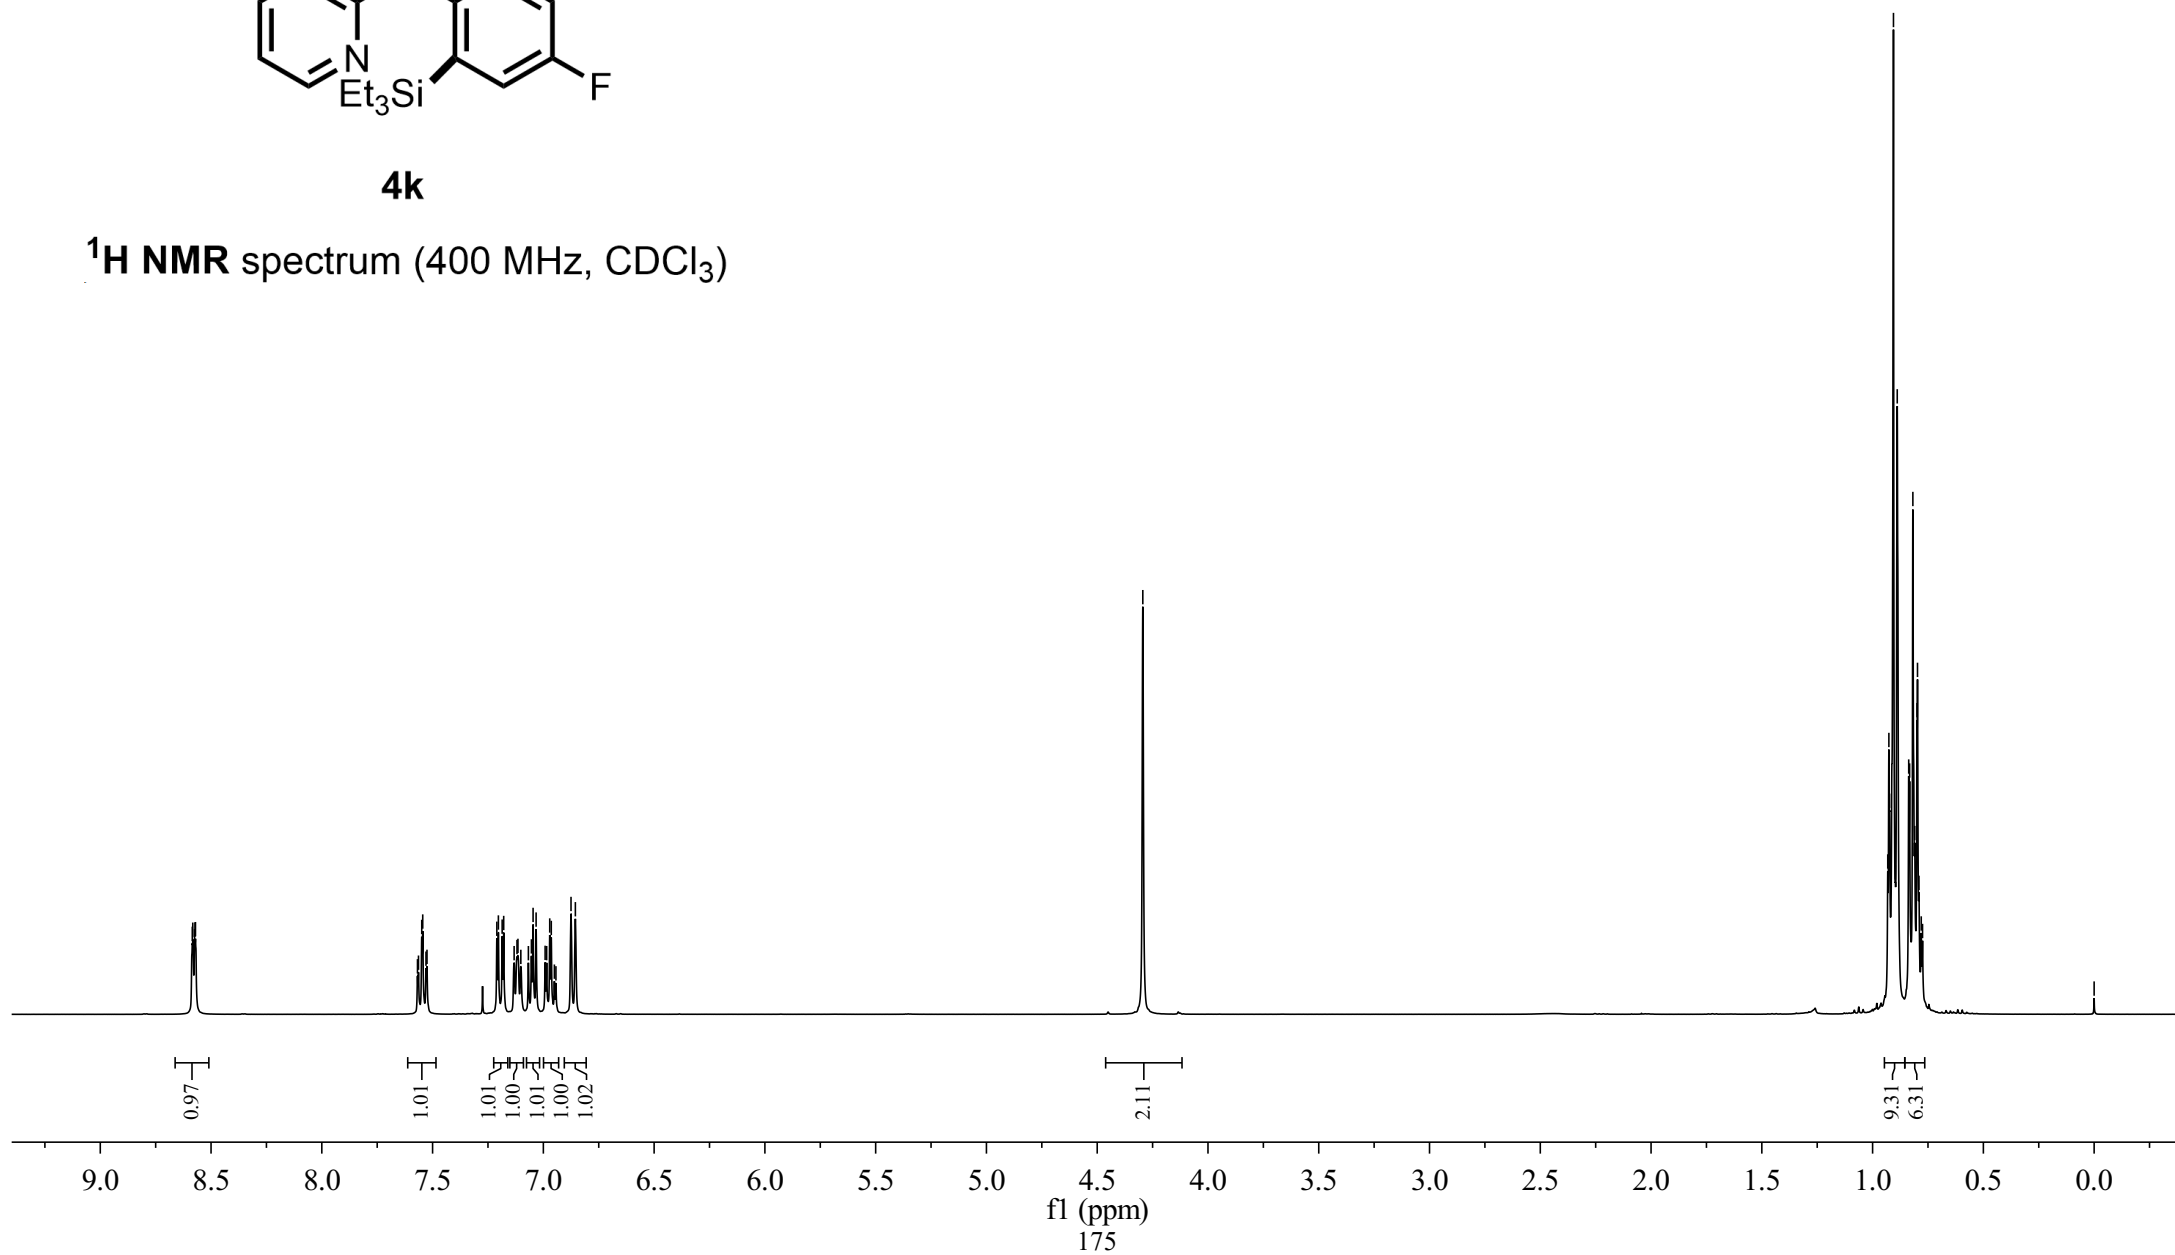

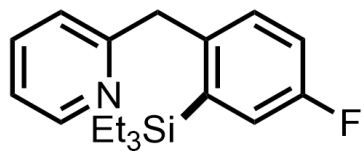

4k

<sup>13</sup>C NMR spectrum (100 MHz, CDCl<sub>3</sub>)

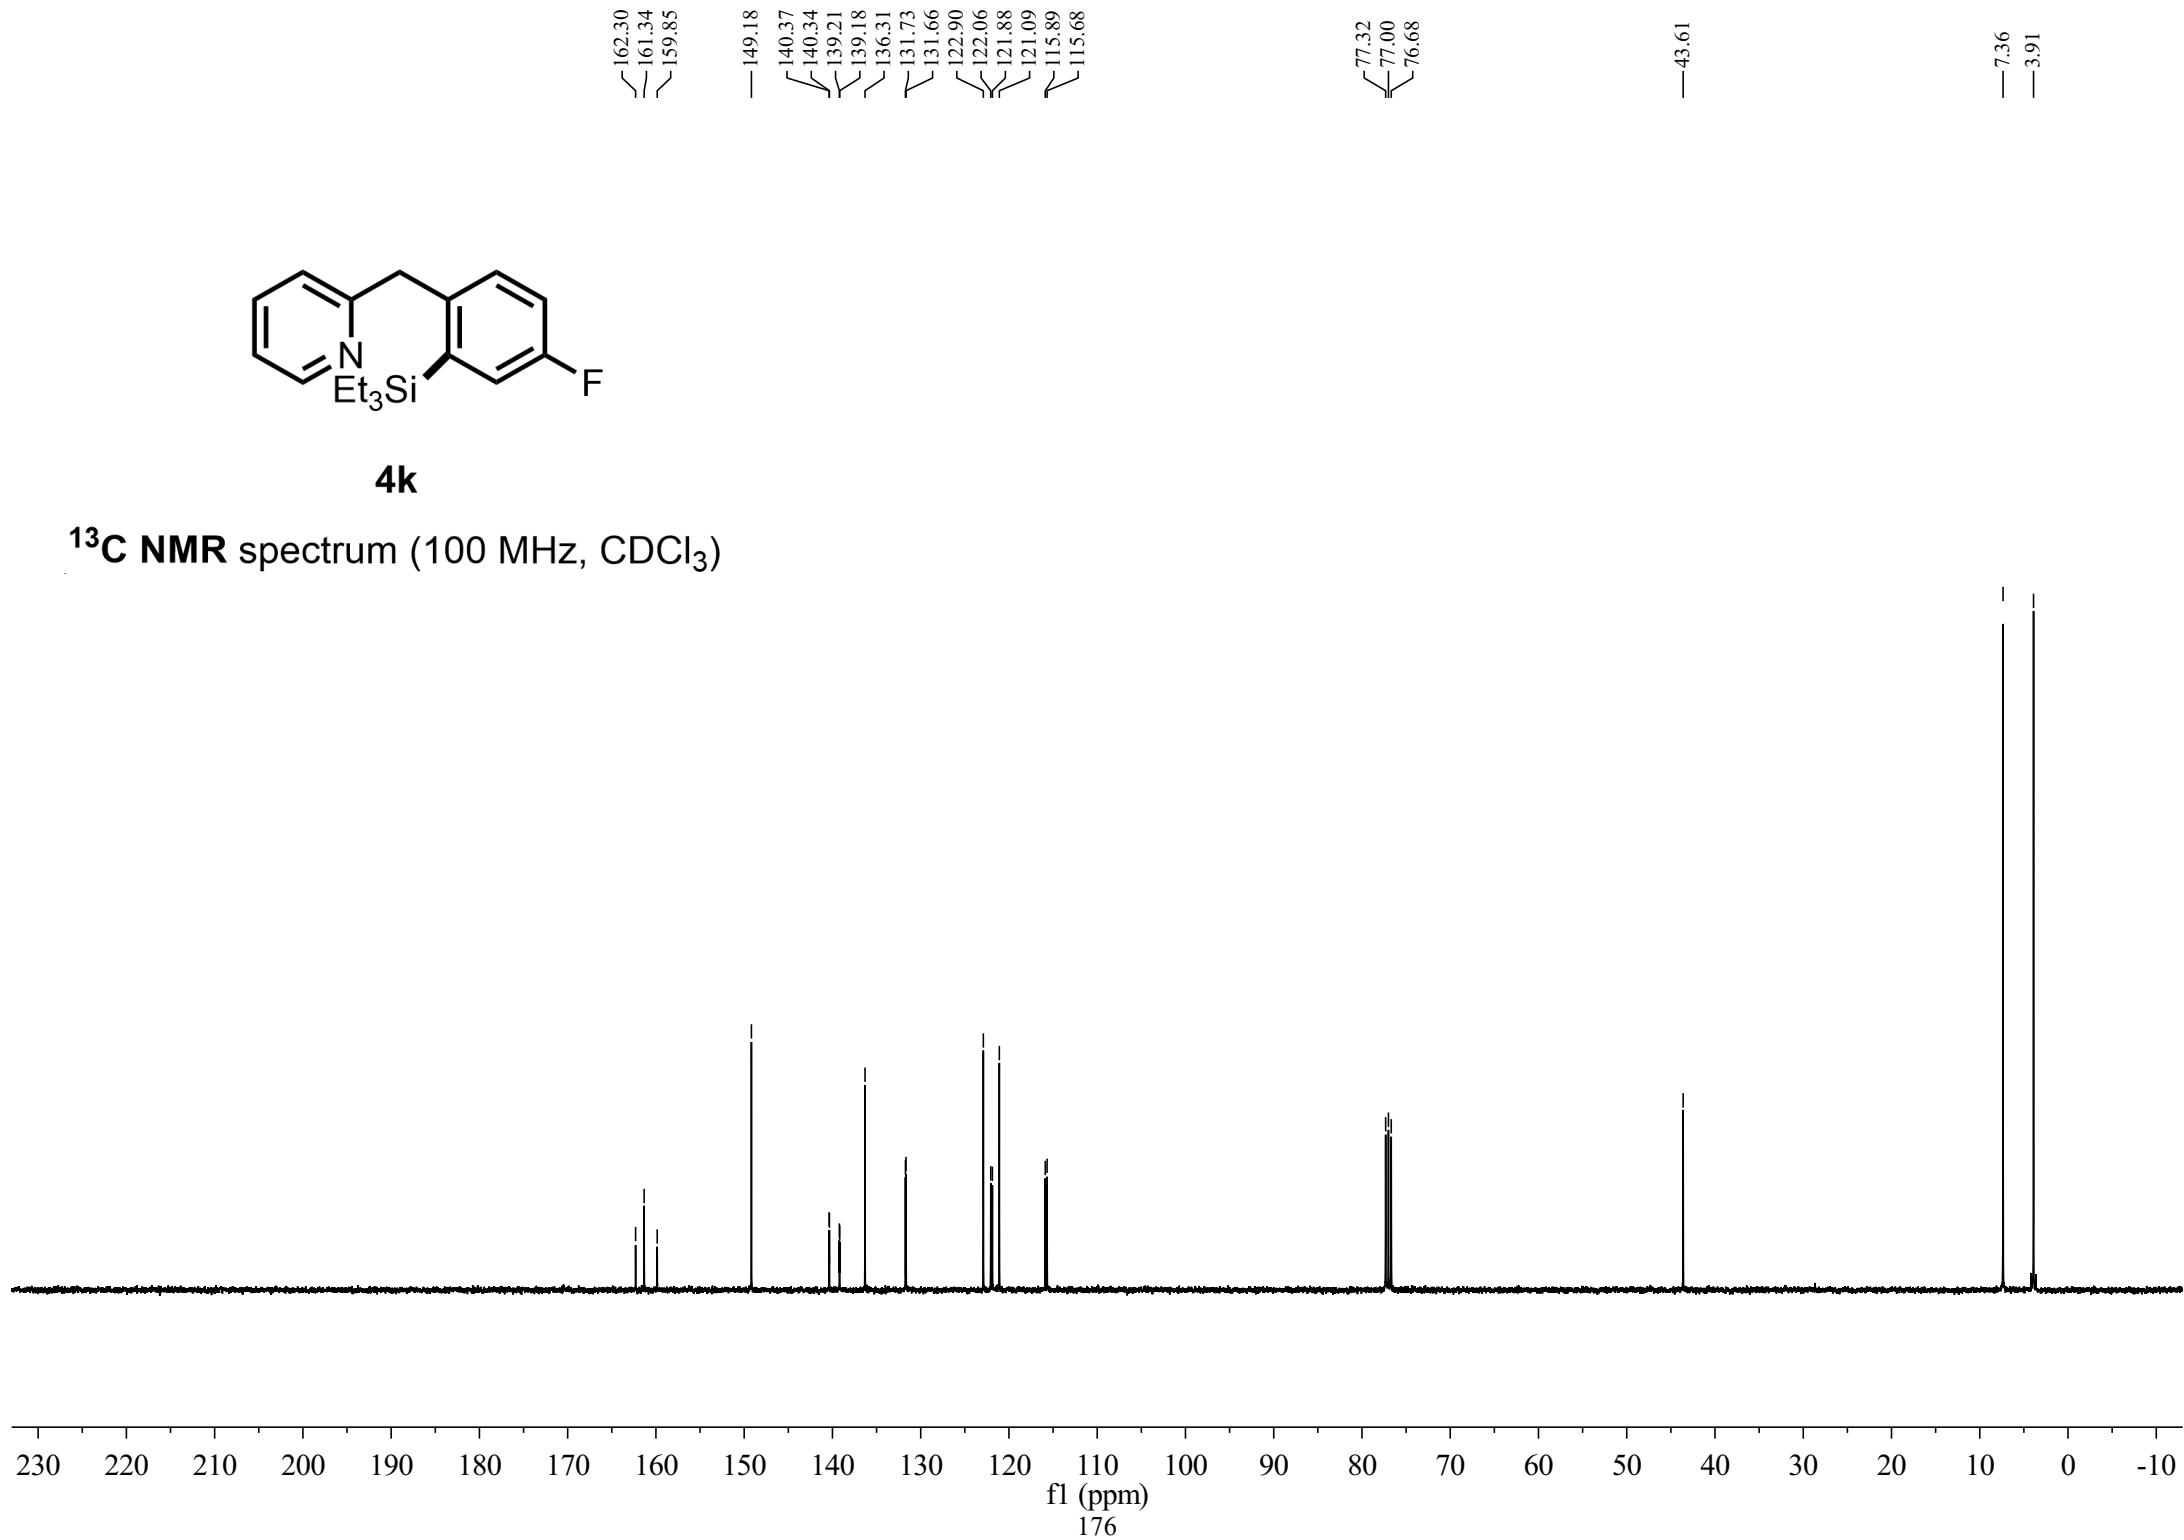



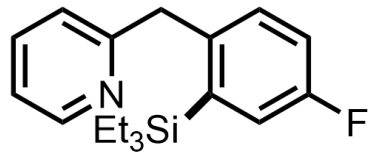

**4k**

**<sup>19</sup>F NMR spectrum (376 MHz, CDCl<sub>3</sub>)**

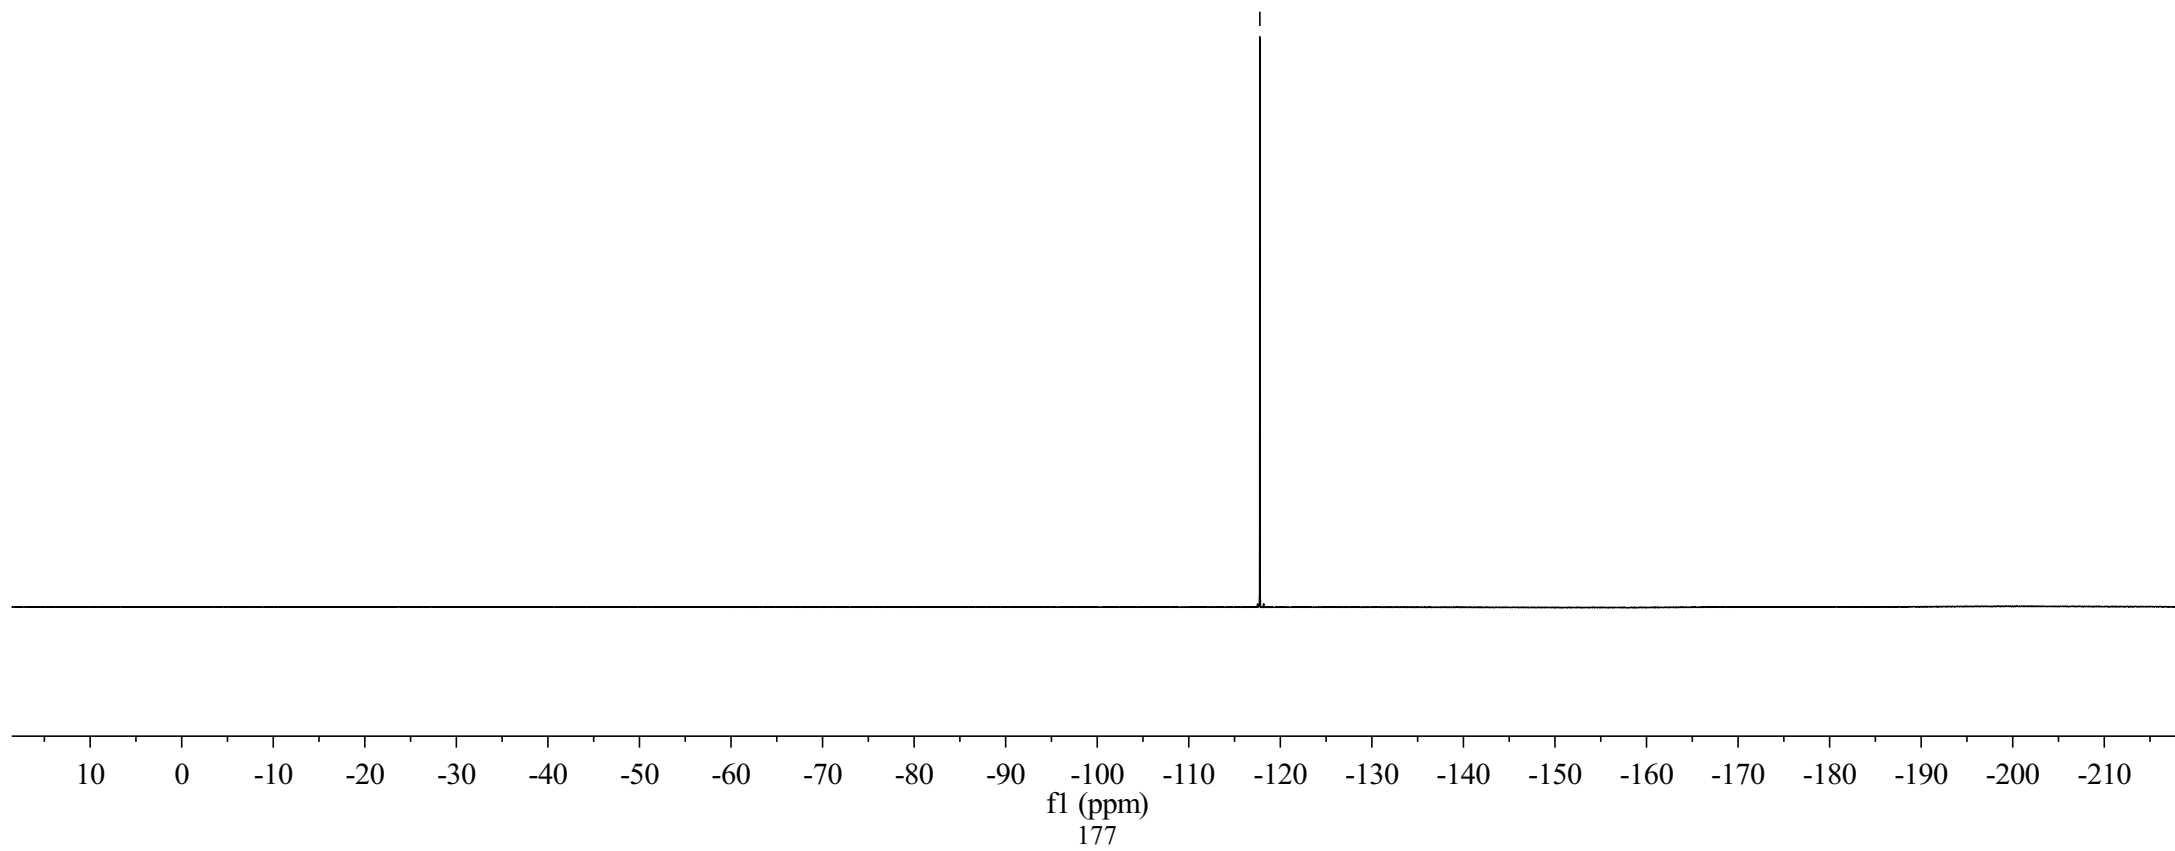

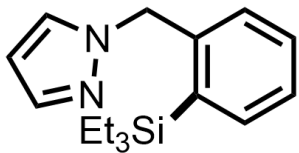

**4I**

**<sup>1</sup>H NMR spectrum (400 MHz, CDCl<sub>3</sub>)**

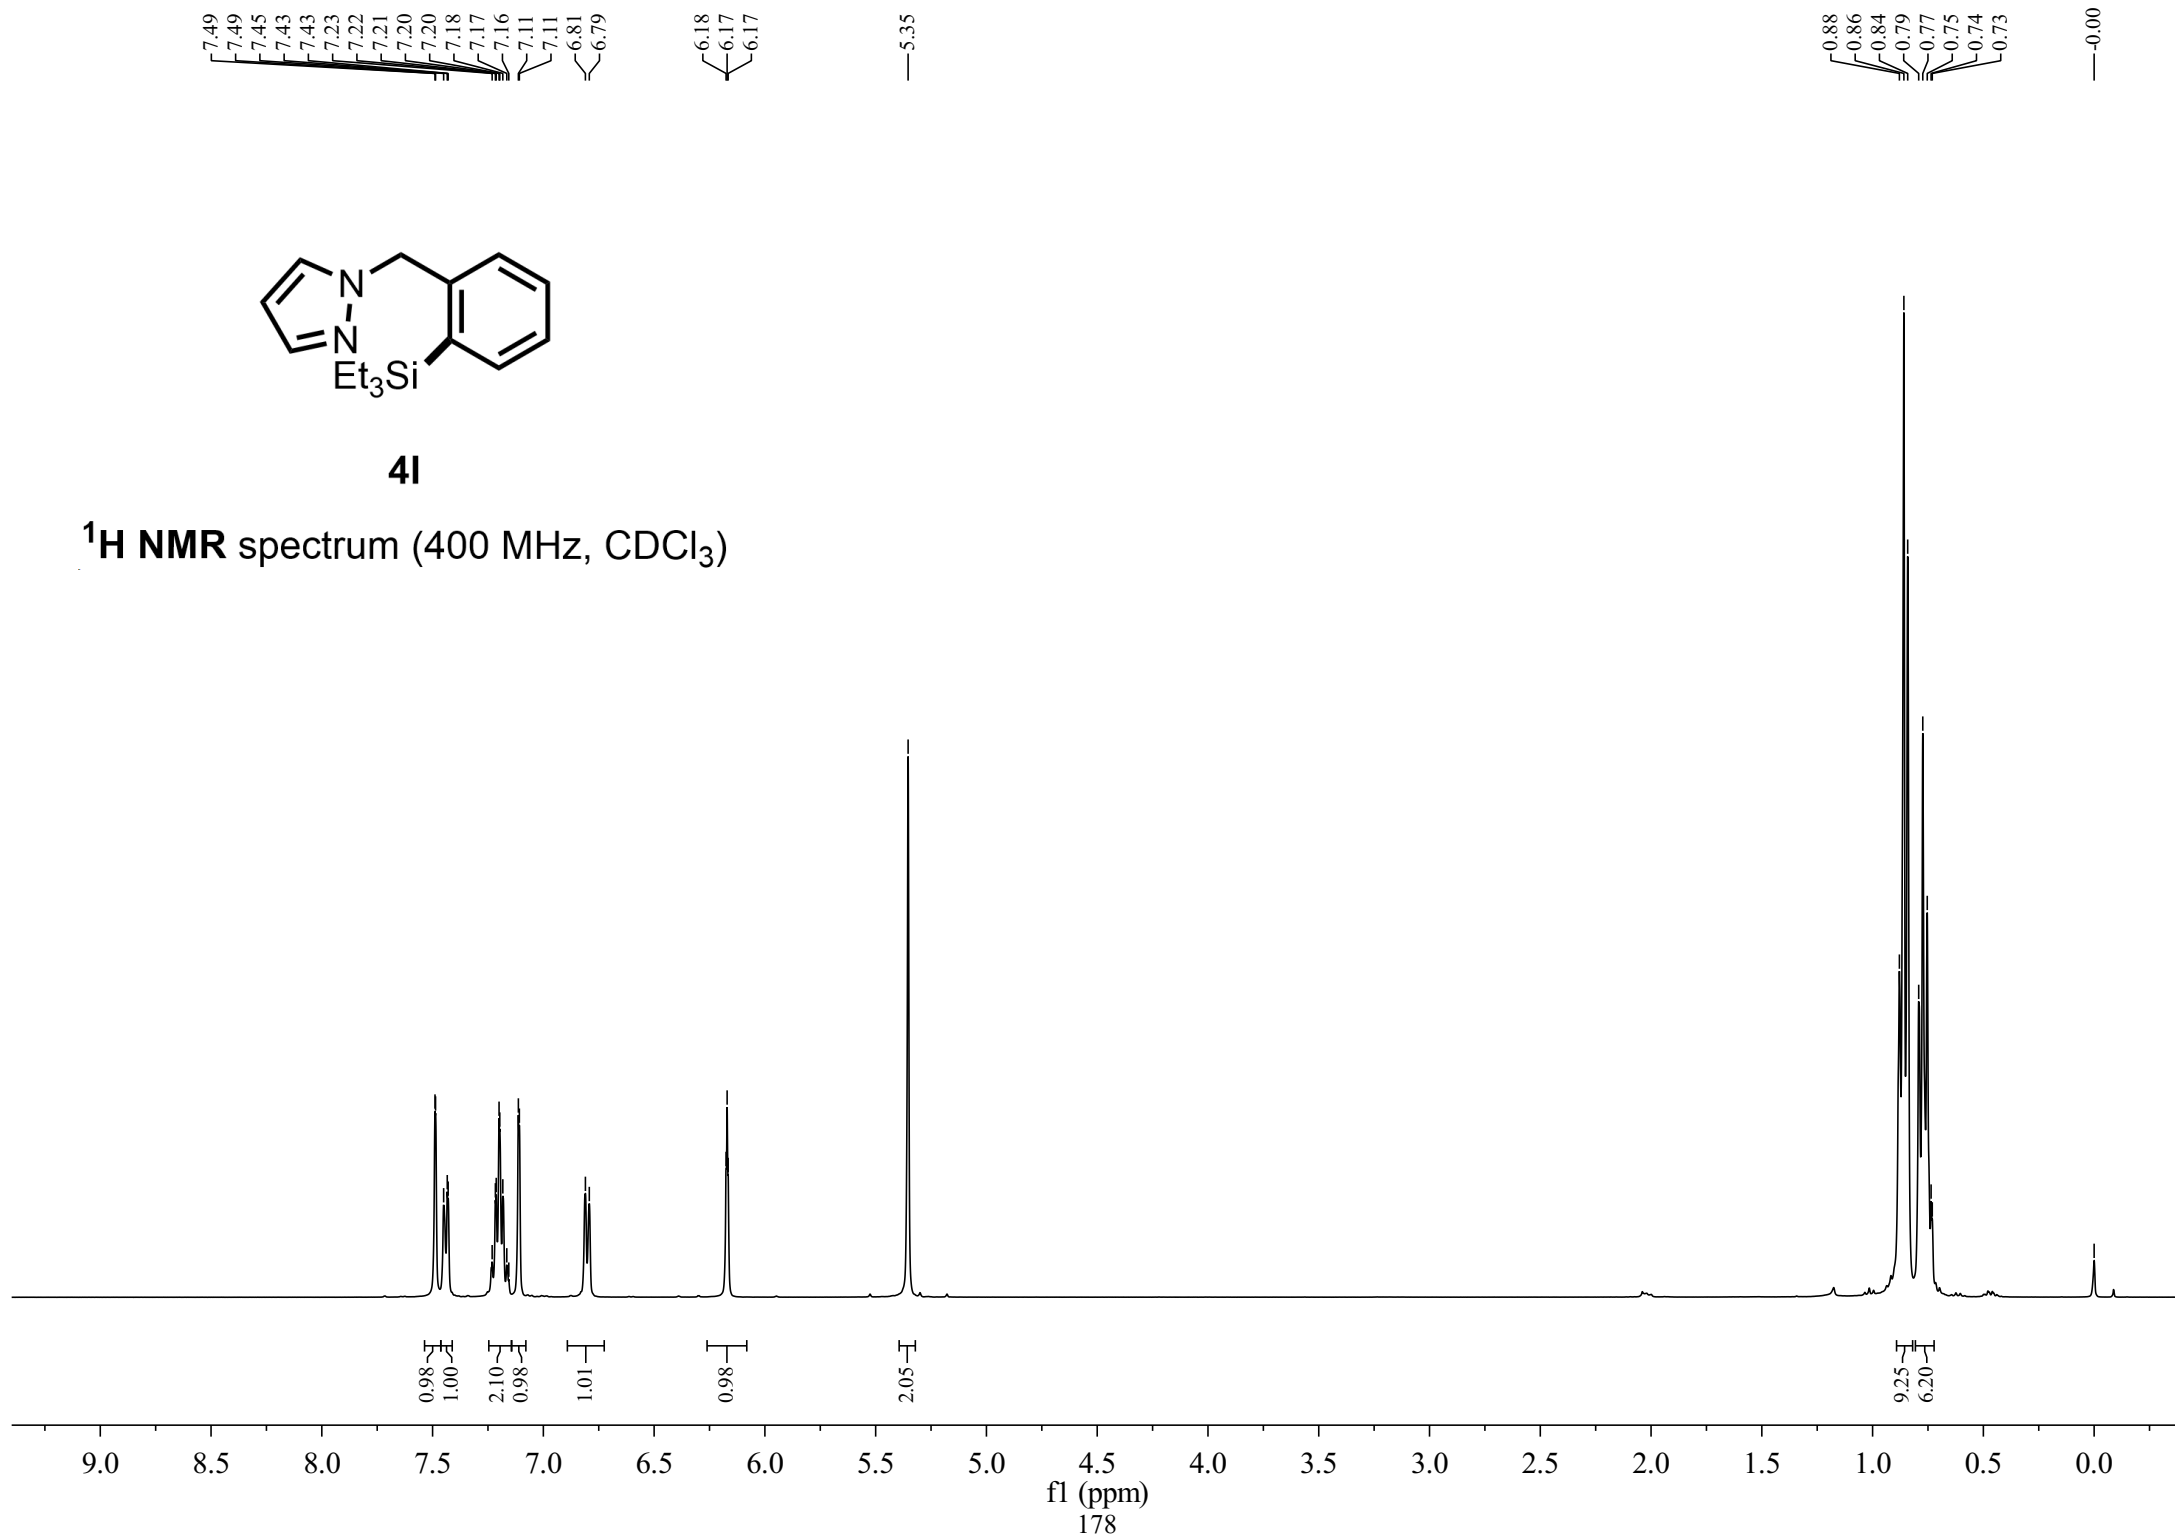

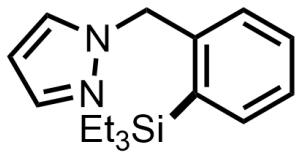

4l

<sup>13</sup>C NMR spectrum (100 MHz, CDCl<sub>3</sub>)

142.05  
139.30  
135.74  
135.14  
129.46  
129.17  
127.95  
126.99

105.72

77.32  
77.00  
76.68

55.82

7.44  
4.05

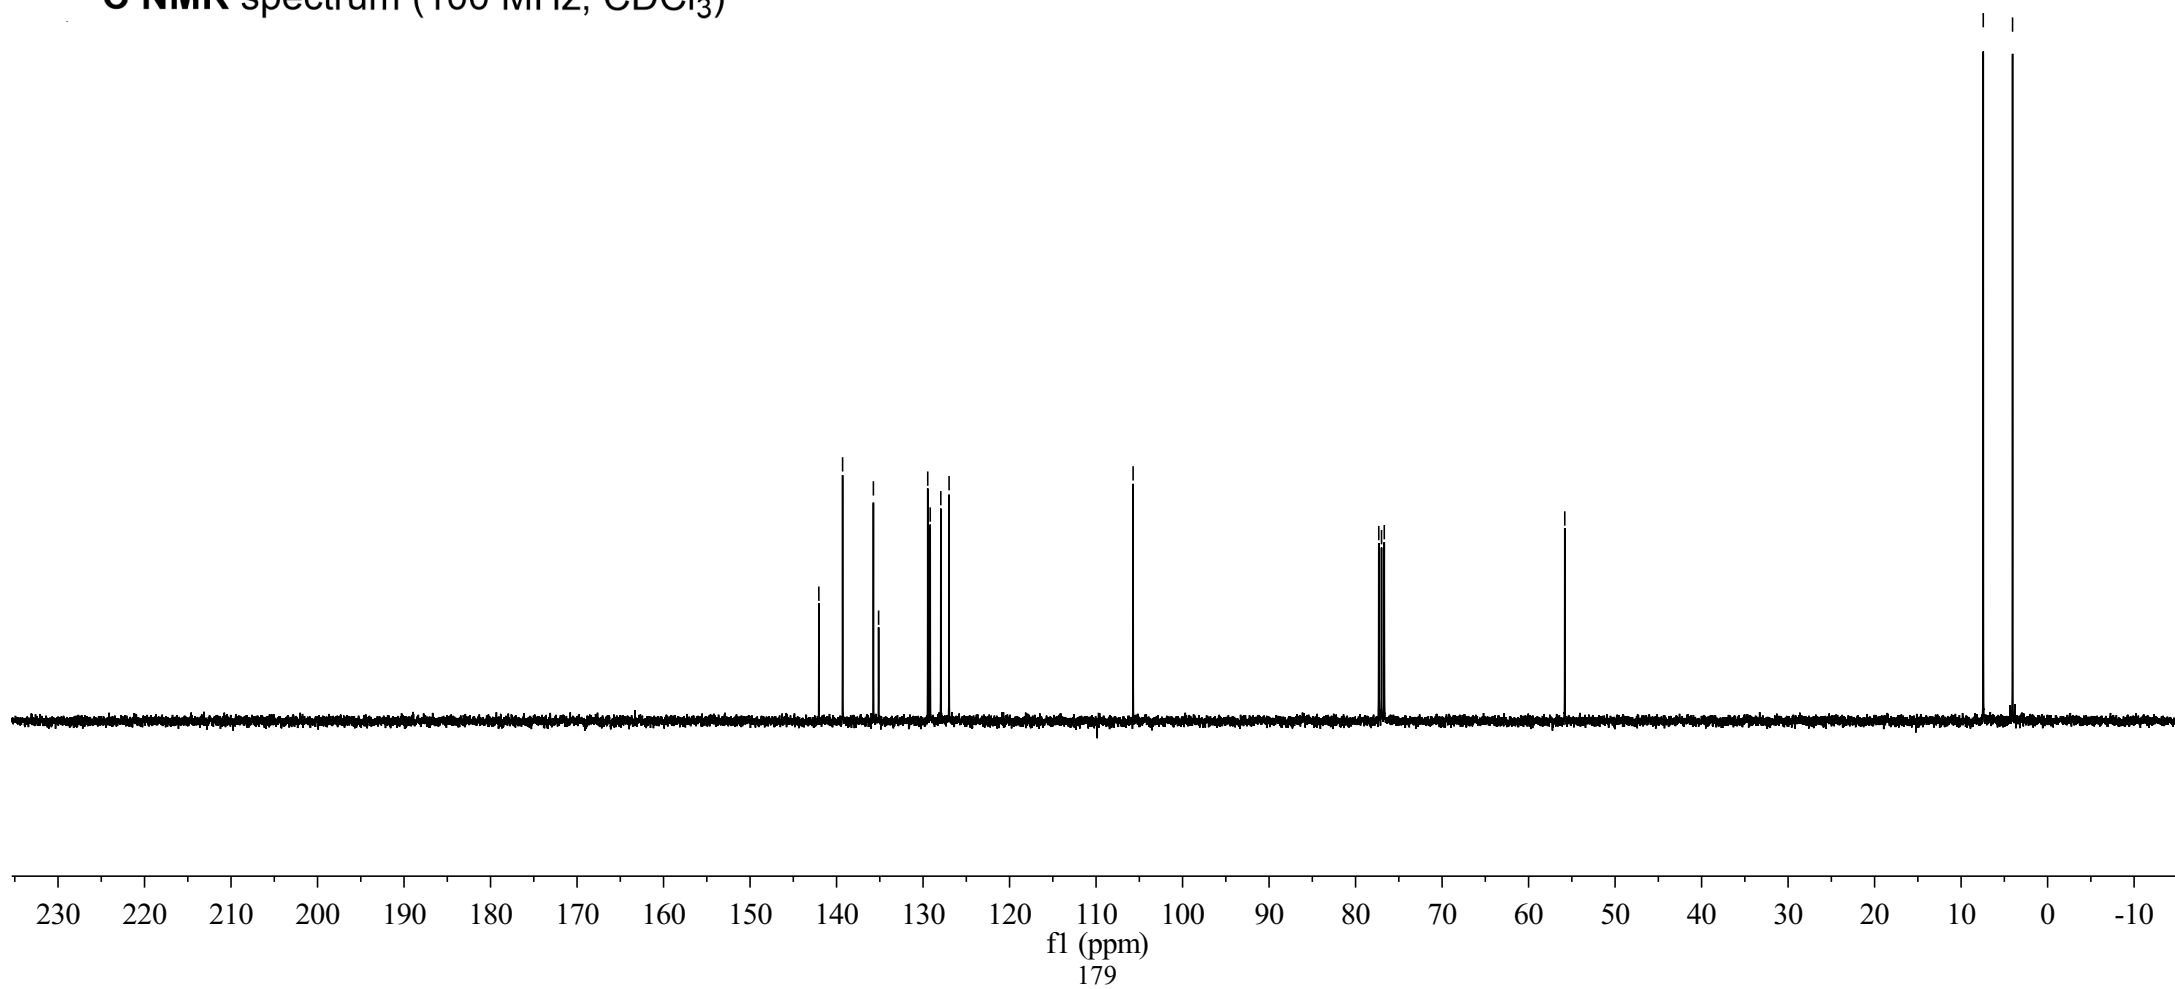

8.52  
8.51  
7.89  
7.87  
7.85  
7.83  
7.63  
7.60  
7.59  
7.55  
7.54  
7.45  
7.26  
7.16  
7.09  
6.88  
6.58

4.82

1.06  
1.05  
1.04  
1.03  
1.02  
1.01  
1.01  
1.00  
0.98  
0.98

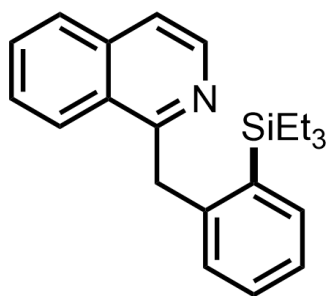

4m

<sup>1</sup>H NMR spectrum (400 MHz, CDCl<sub>3</sub>)

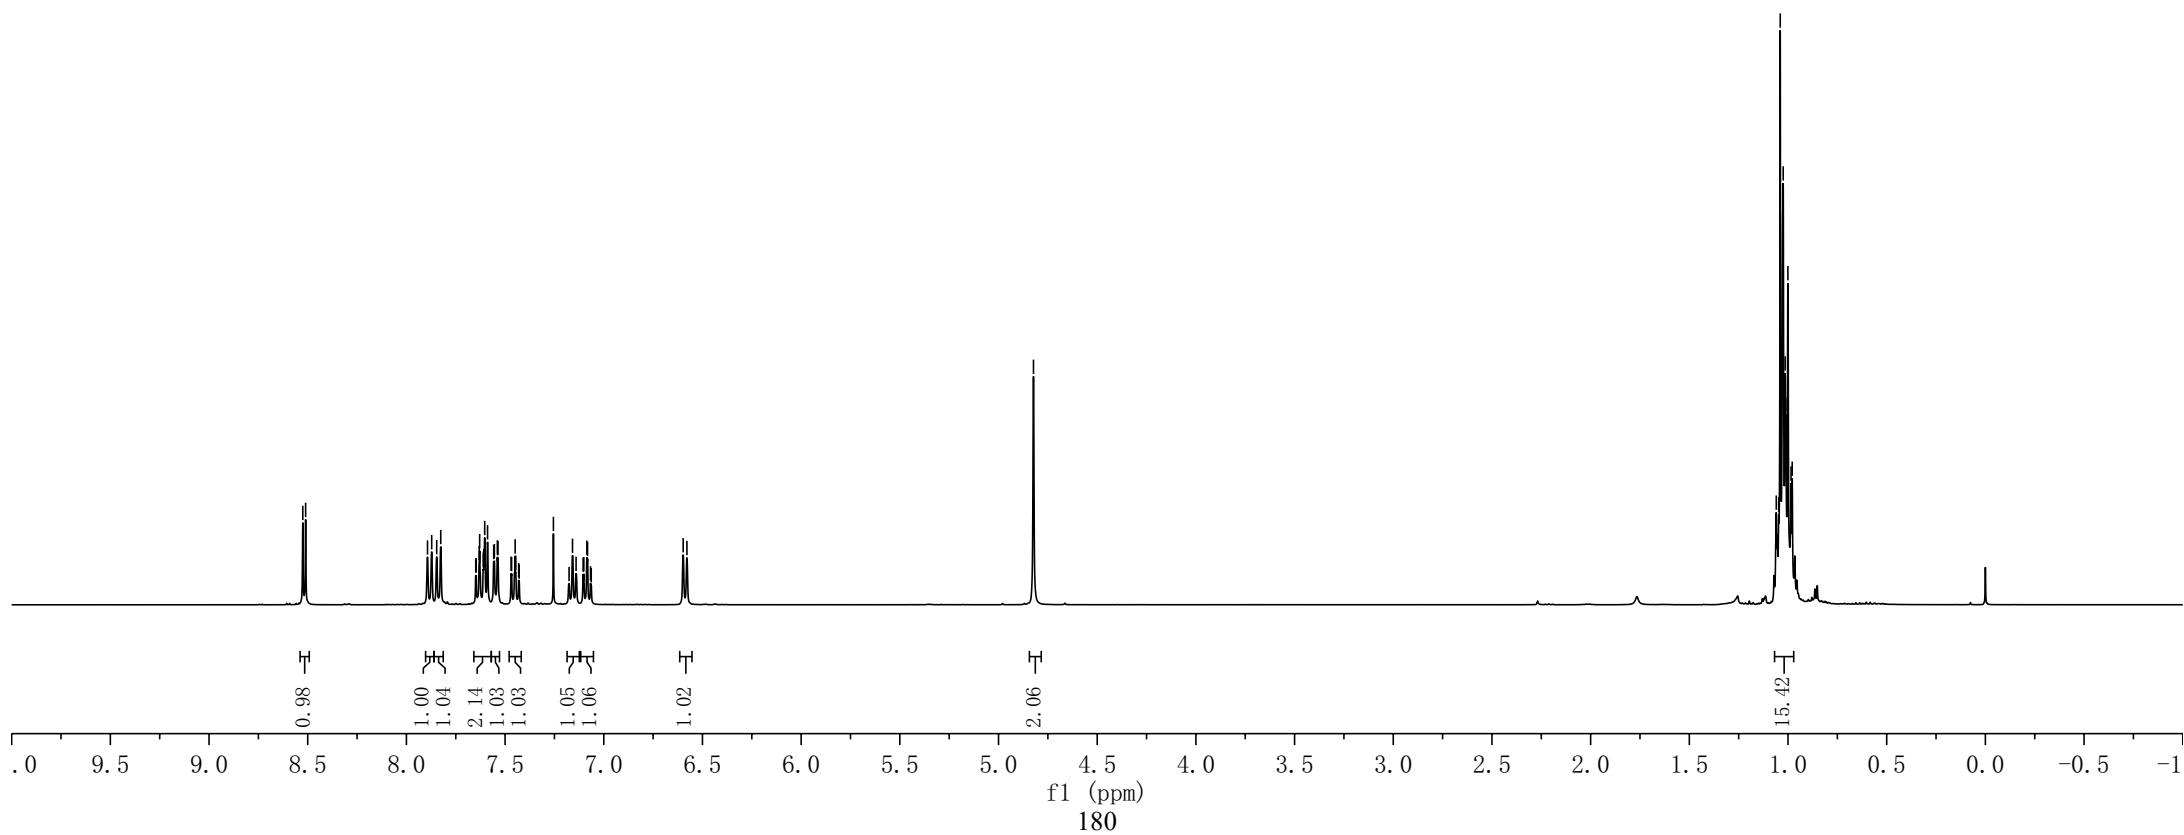

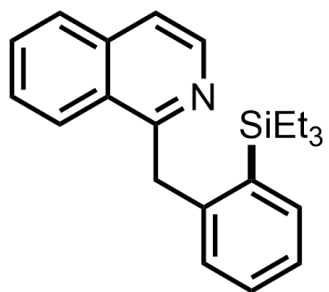

4m

<sup>13</sup>C NMR spectrum (100 MHz, CDCl<sub>3</sub>)

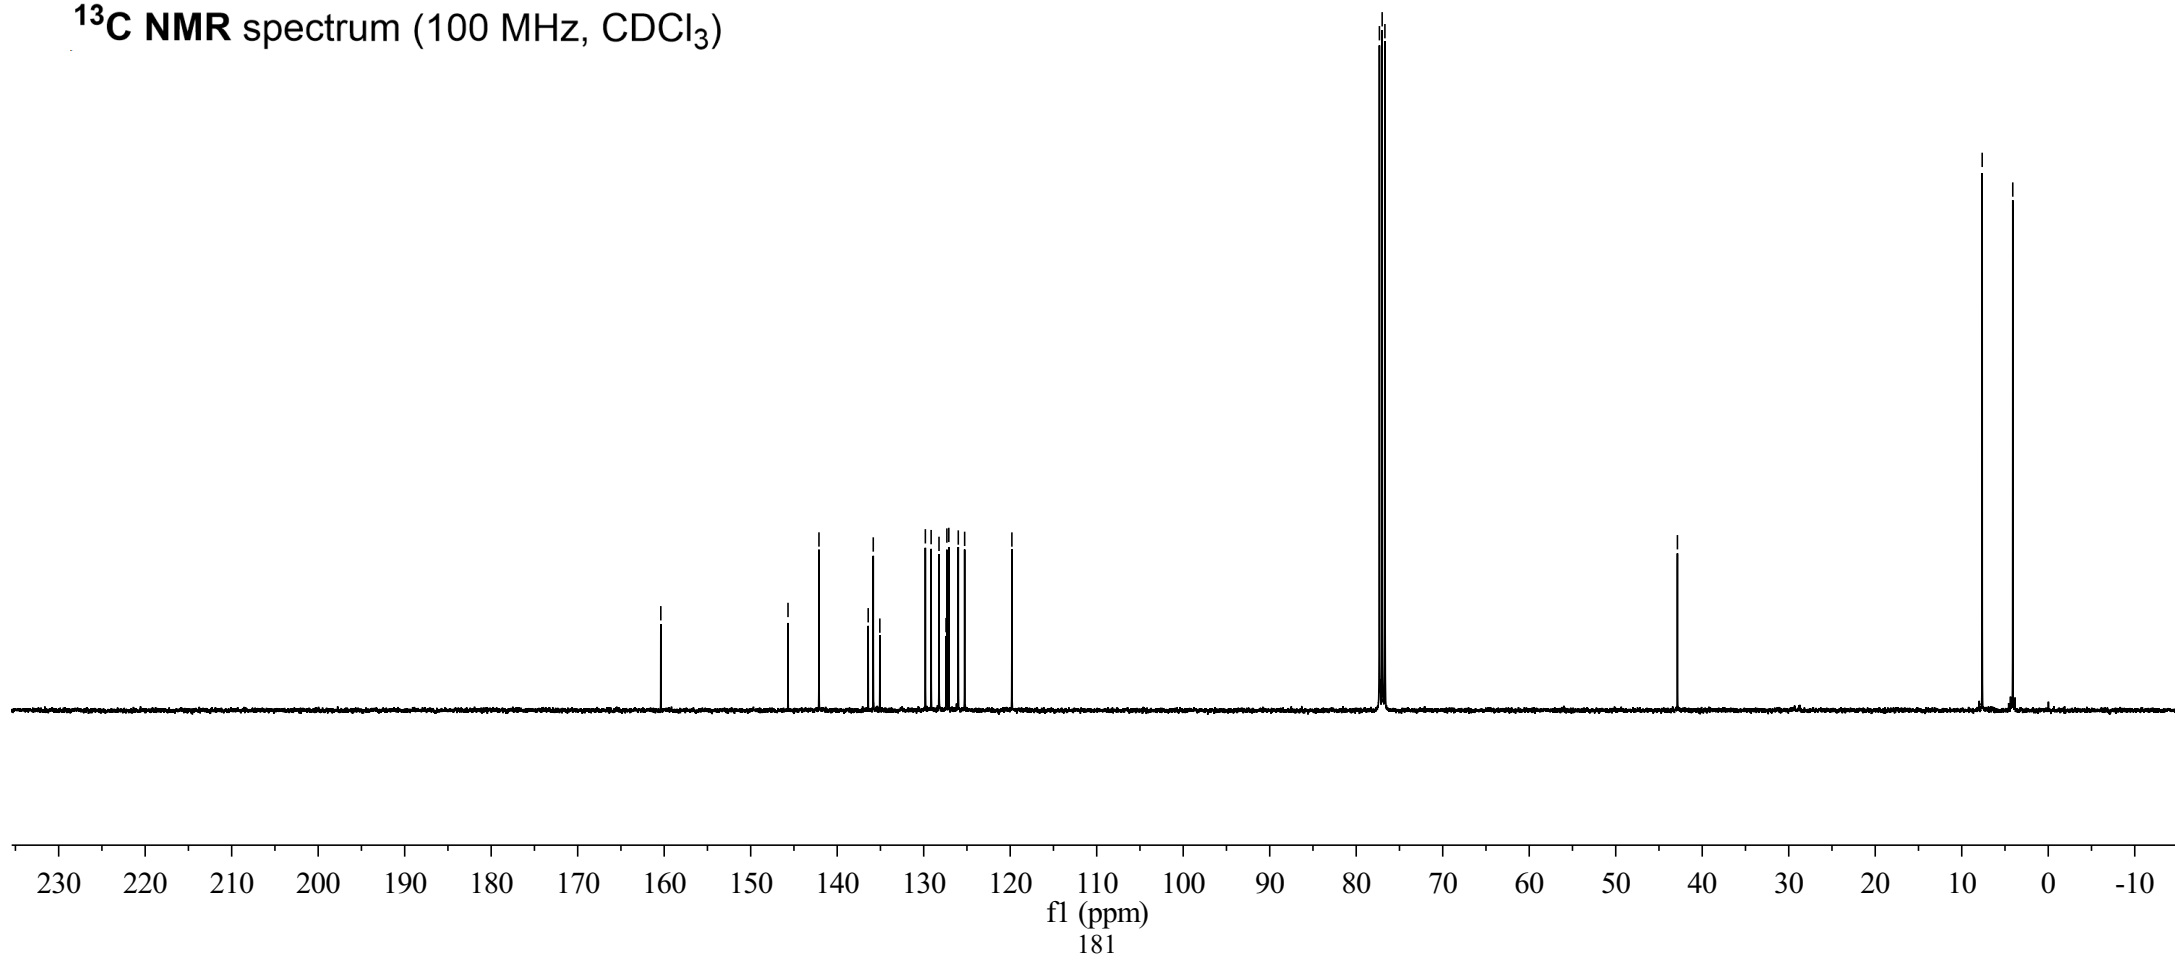

8.00  
7.98  
7.81  
7.80  
7.79  
7.74  
7.72  
7.46  
7.44  
7.44  
7.42  
7.30  
7.29  
7.29  
7.26  
7.25  
7.24  
7.22  
7.20  
7.19

4.29

1.01  
1.00  
0.99  
0.97  
0.97  
0.95  
0.93  
0.92  
0.91

0.00

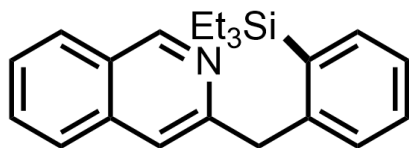

**4n**

**<sup>1</sup>H NMR spectrum (400 MHz, CDCl<sub>3</sub>)**

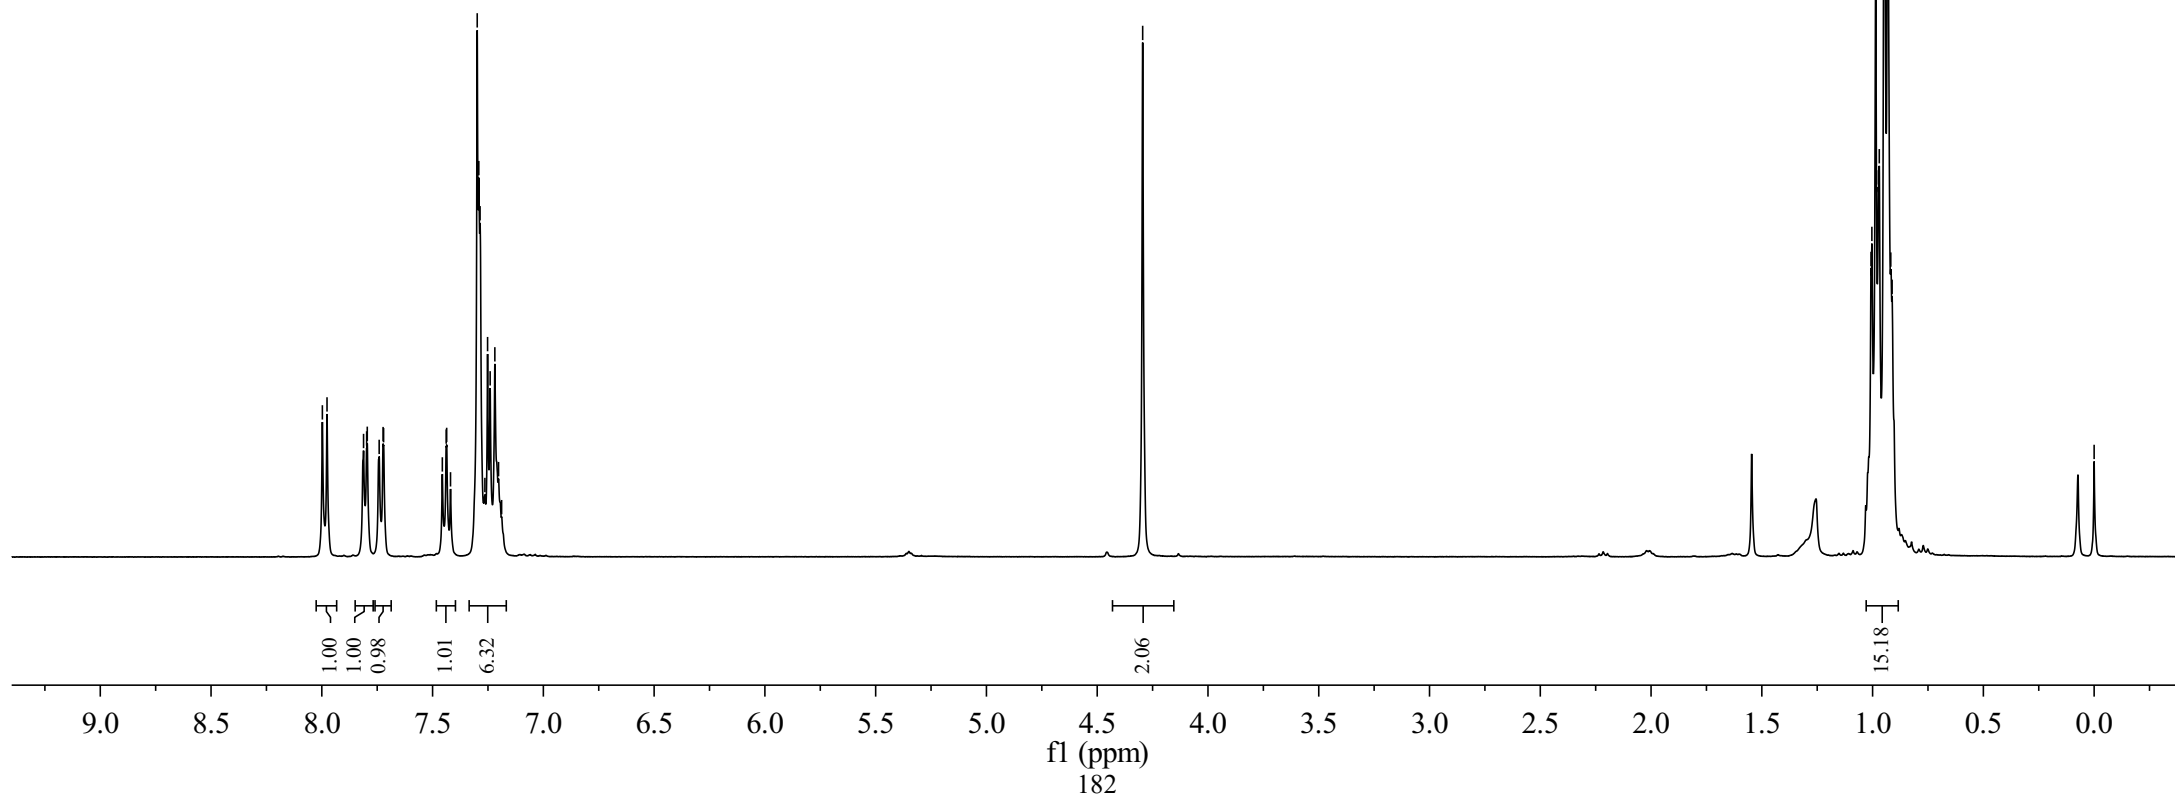

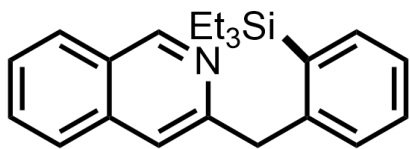

4n

<sup>13</sup>C NMR spectrum (100 MHz, CDCl<sub>3</sub>)

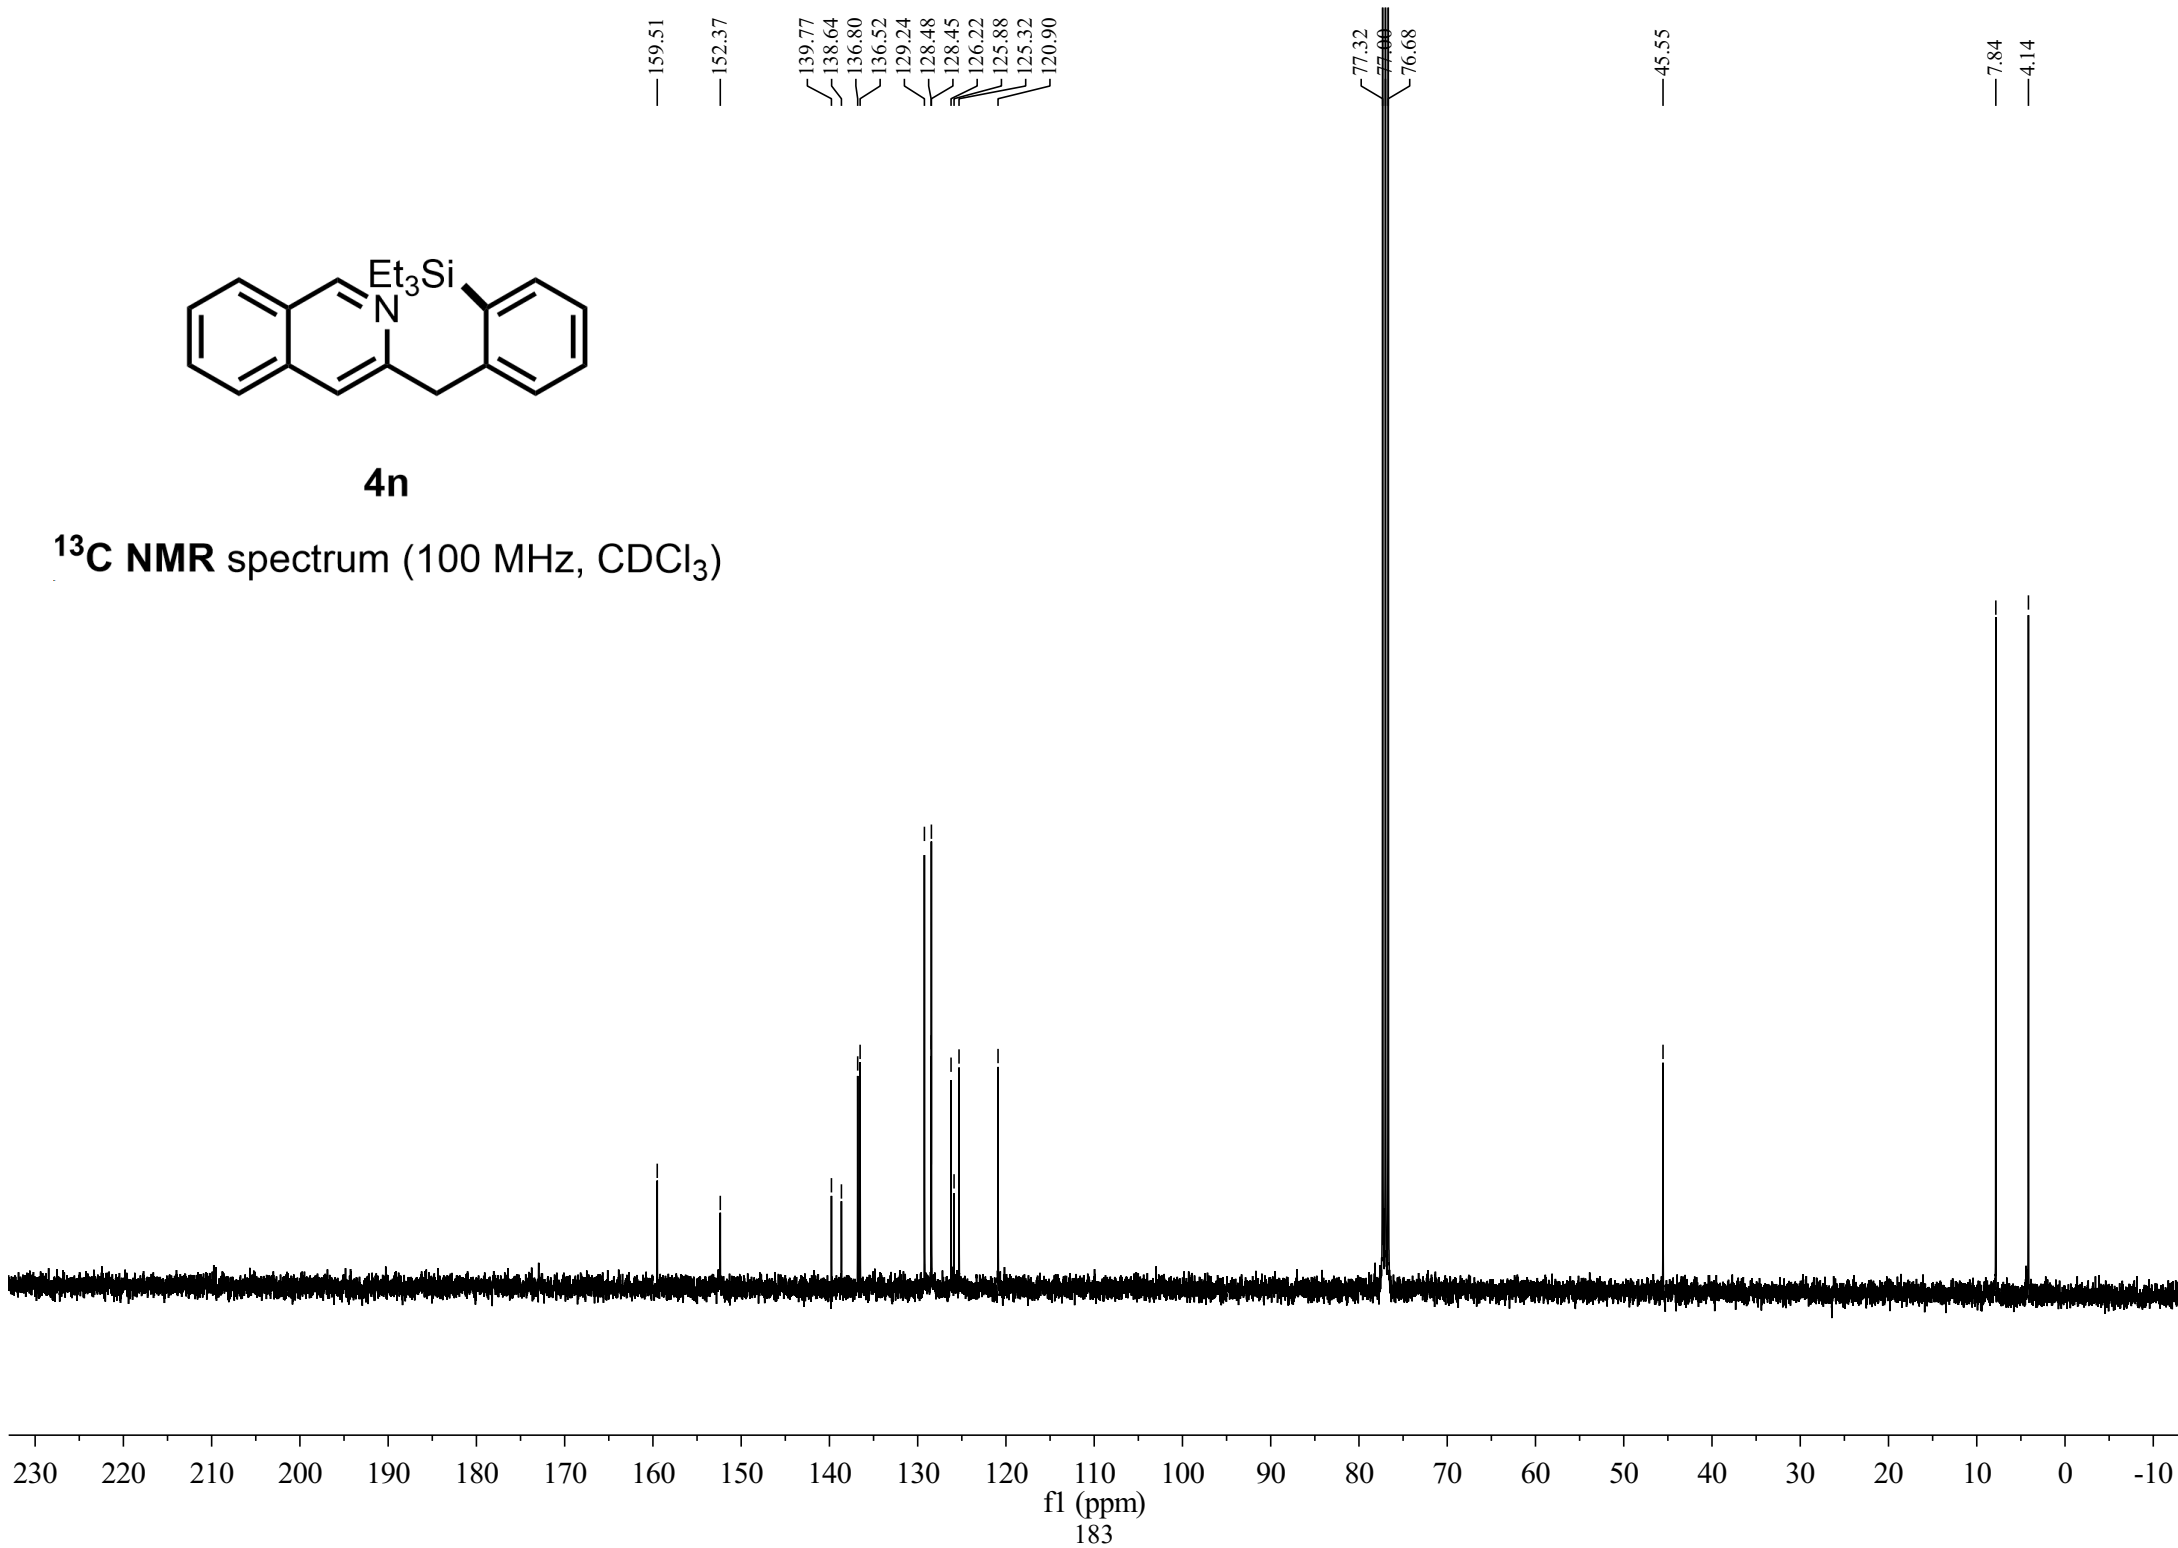

7.90  
7.88  
7.83  
7.83  
7.81  
7.81  
7.47  
7.36  
7.35  
7.34  
7.34  
7.32  
7.32  
7.31  
7.30  
7.29  
7.28

1.05  
1.03  
1.01  
0.90  
0.89  
0.88  
0.87  
0.86  
0.84  
0.83

0.00

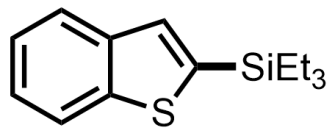

**6a**

<sup>1</sup>H NMR spectrum (400 MHz, CDCl<sub>3</sub>)

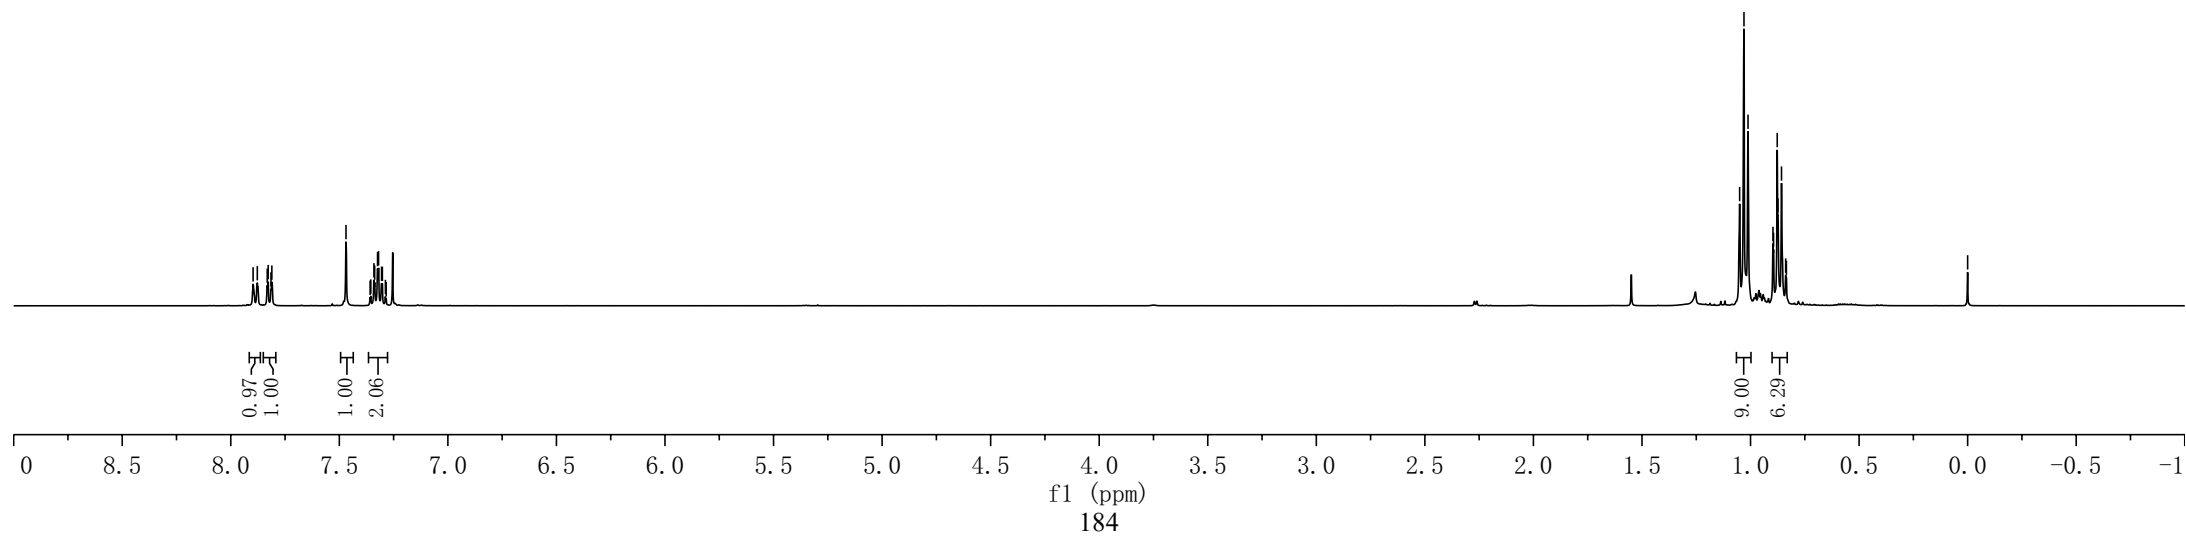



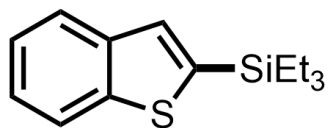

**6a**

<sup>13</sup>C NMR spectrum (100 MHz, CDCl<sub>3</sub>)

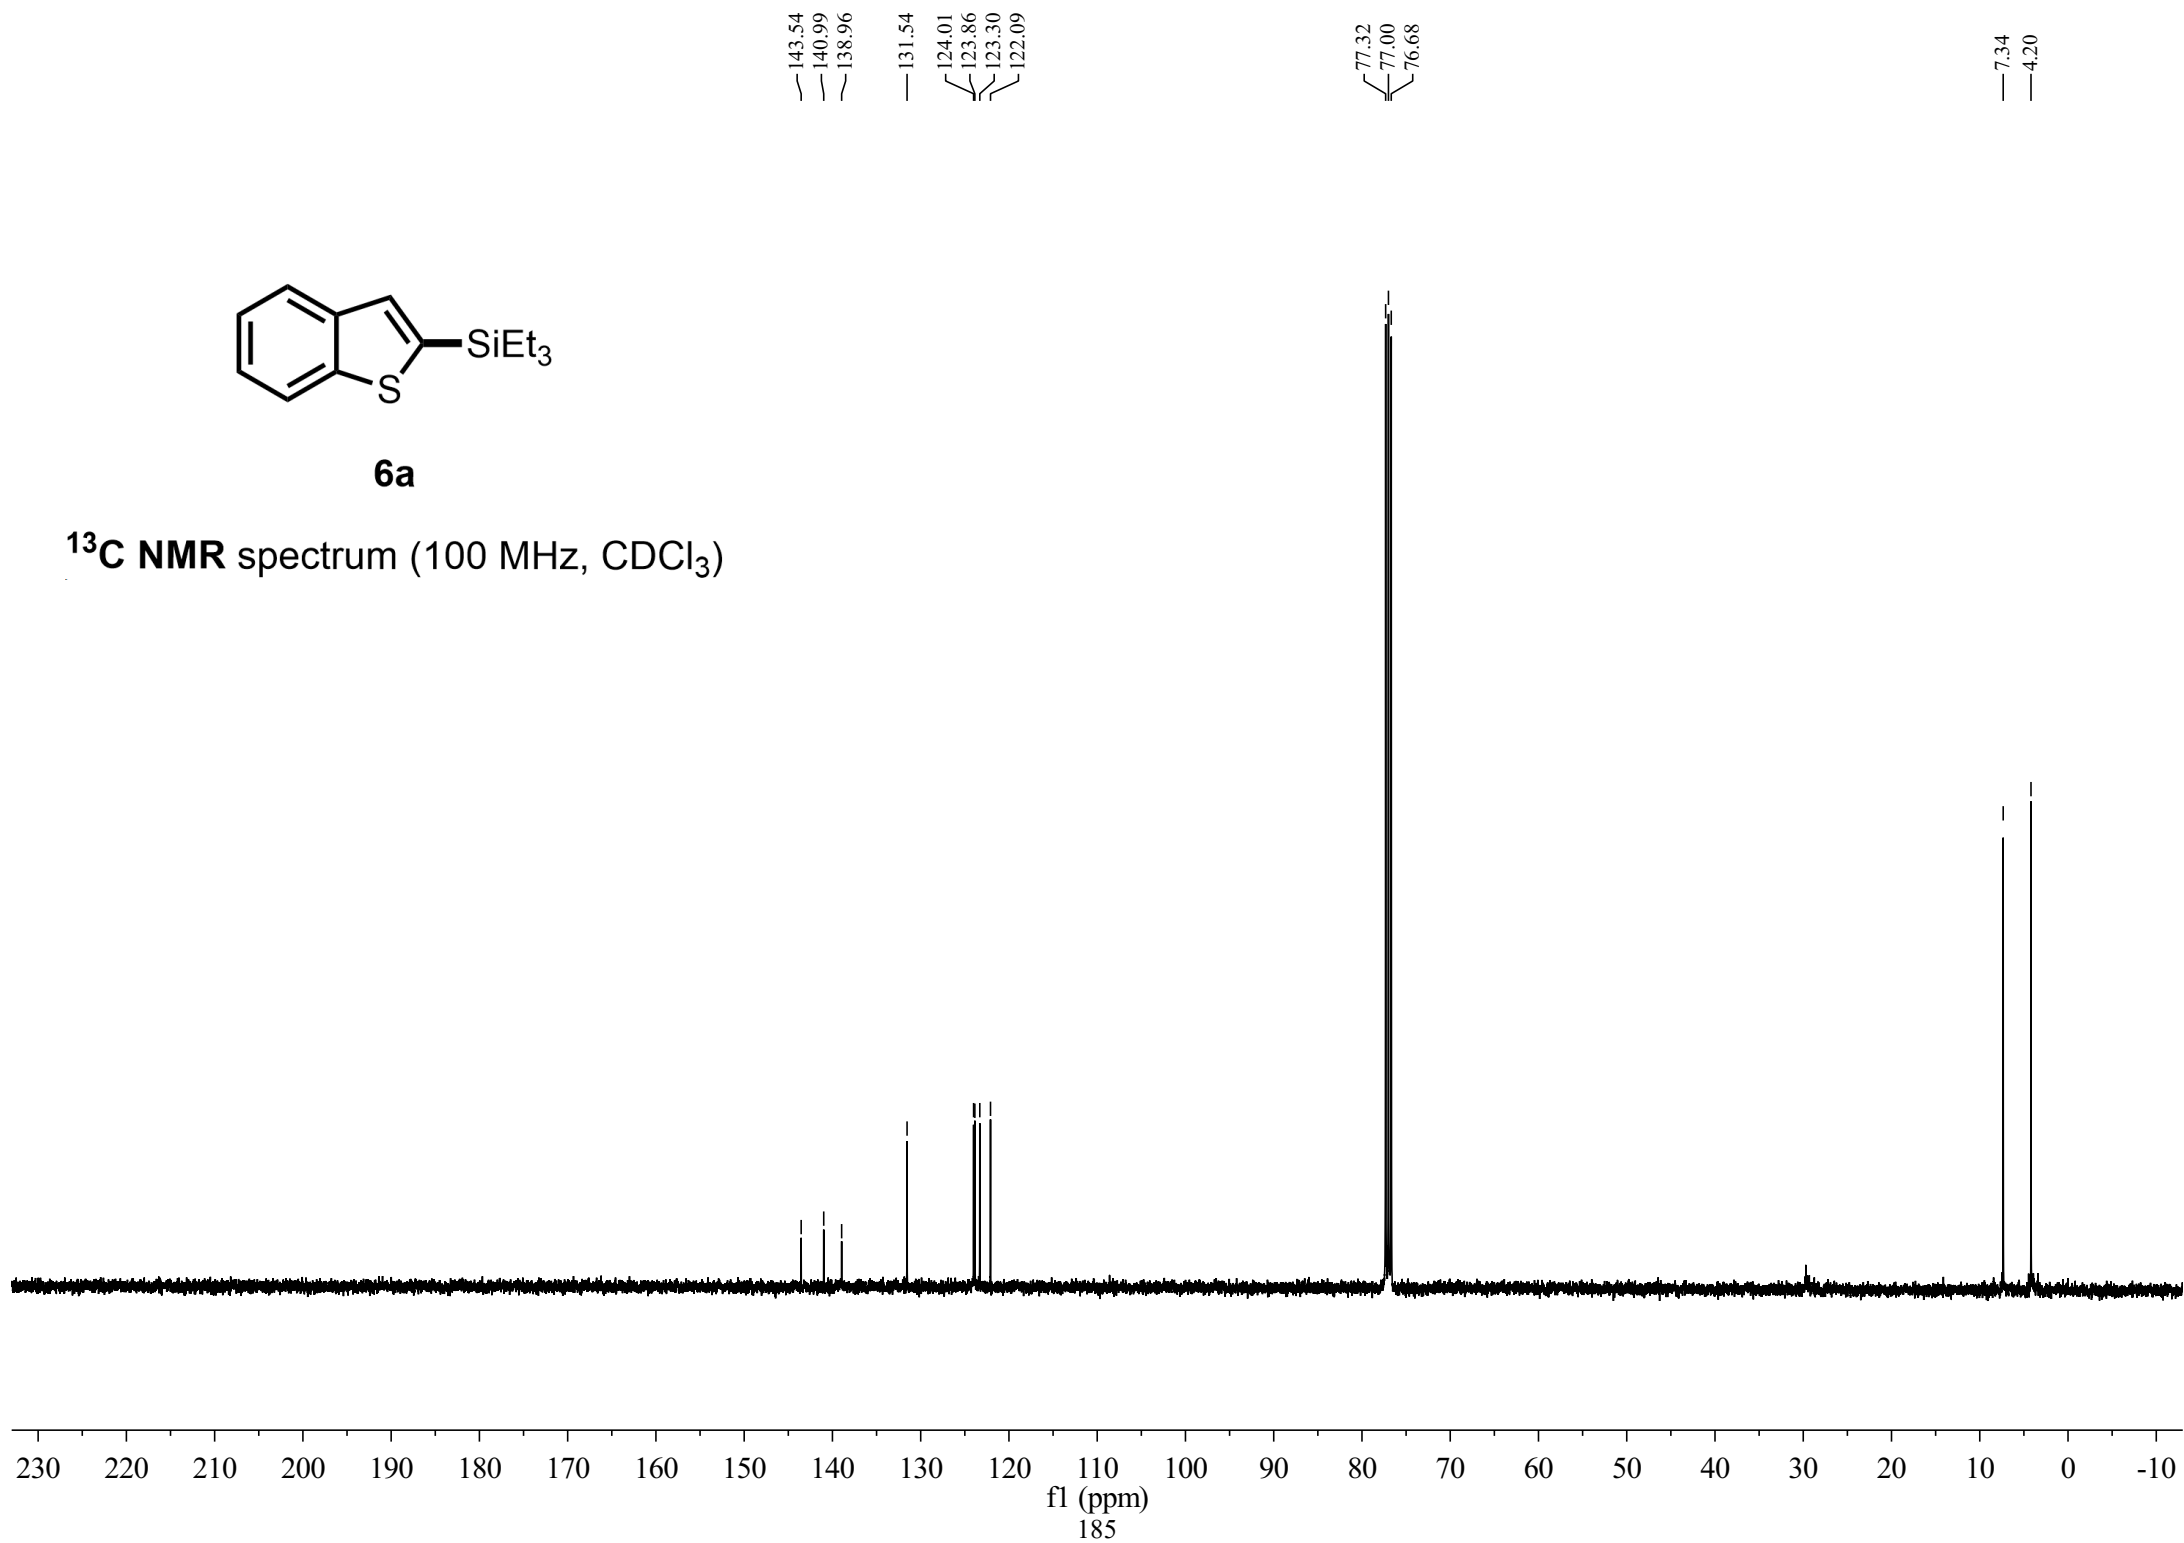

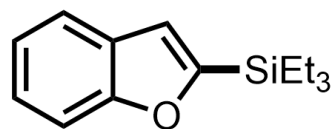

**6b**

<sup>1</sup>H NMR spectrum (400 MHz, CDCl<sub>3</sub>)

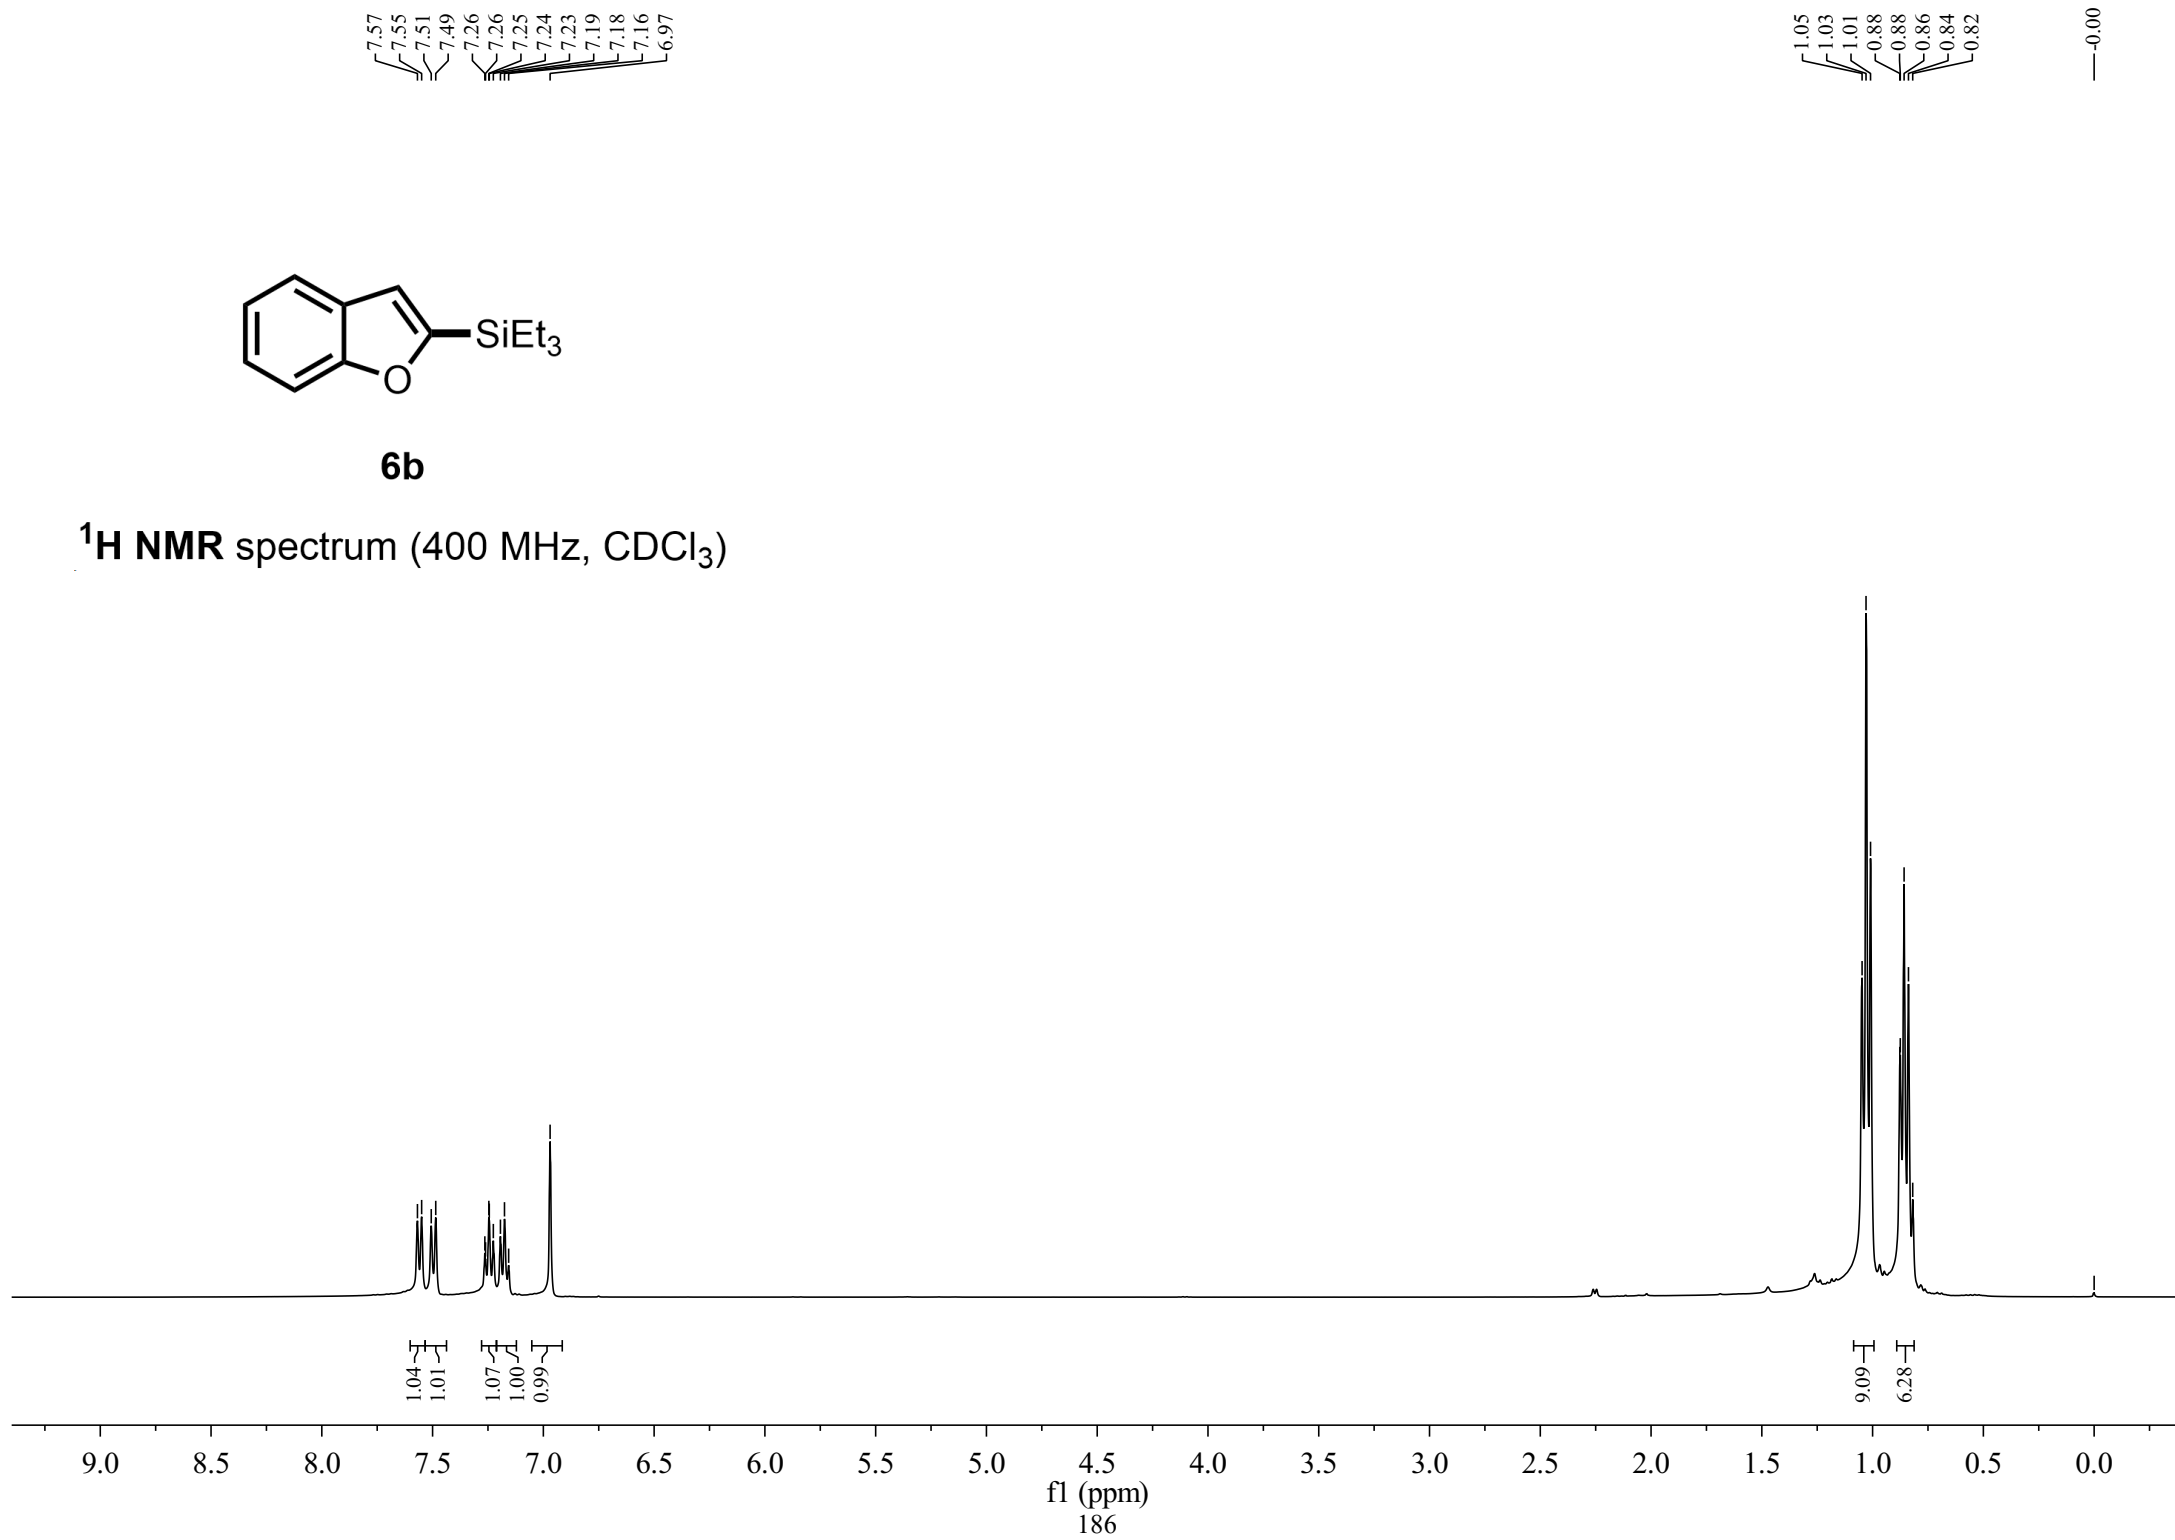

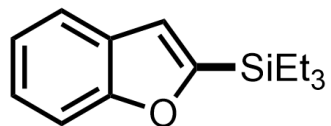

**6b**

<sup>13</sup>C NMR spectrum (100 MHz, CDCl<sub>3</sub>)

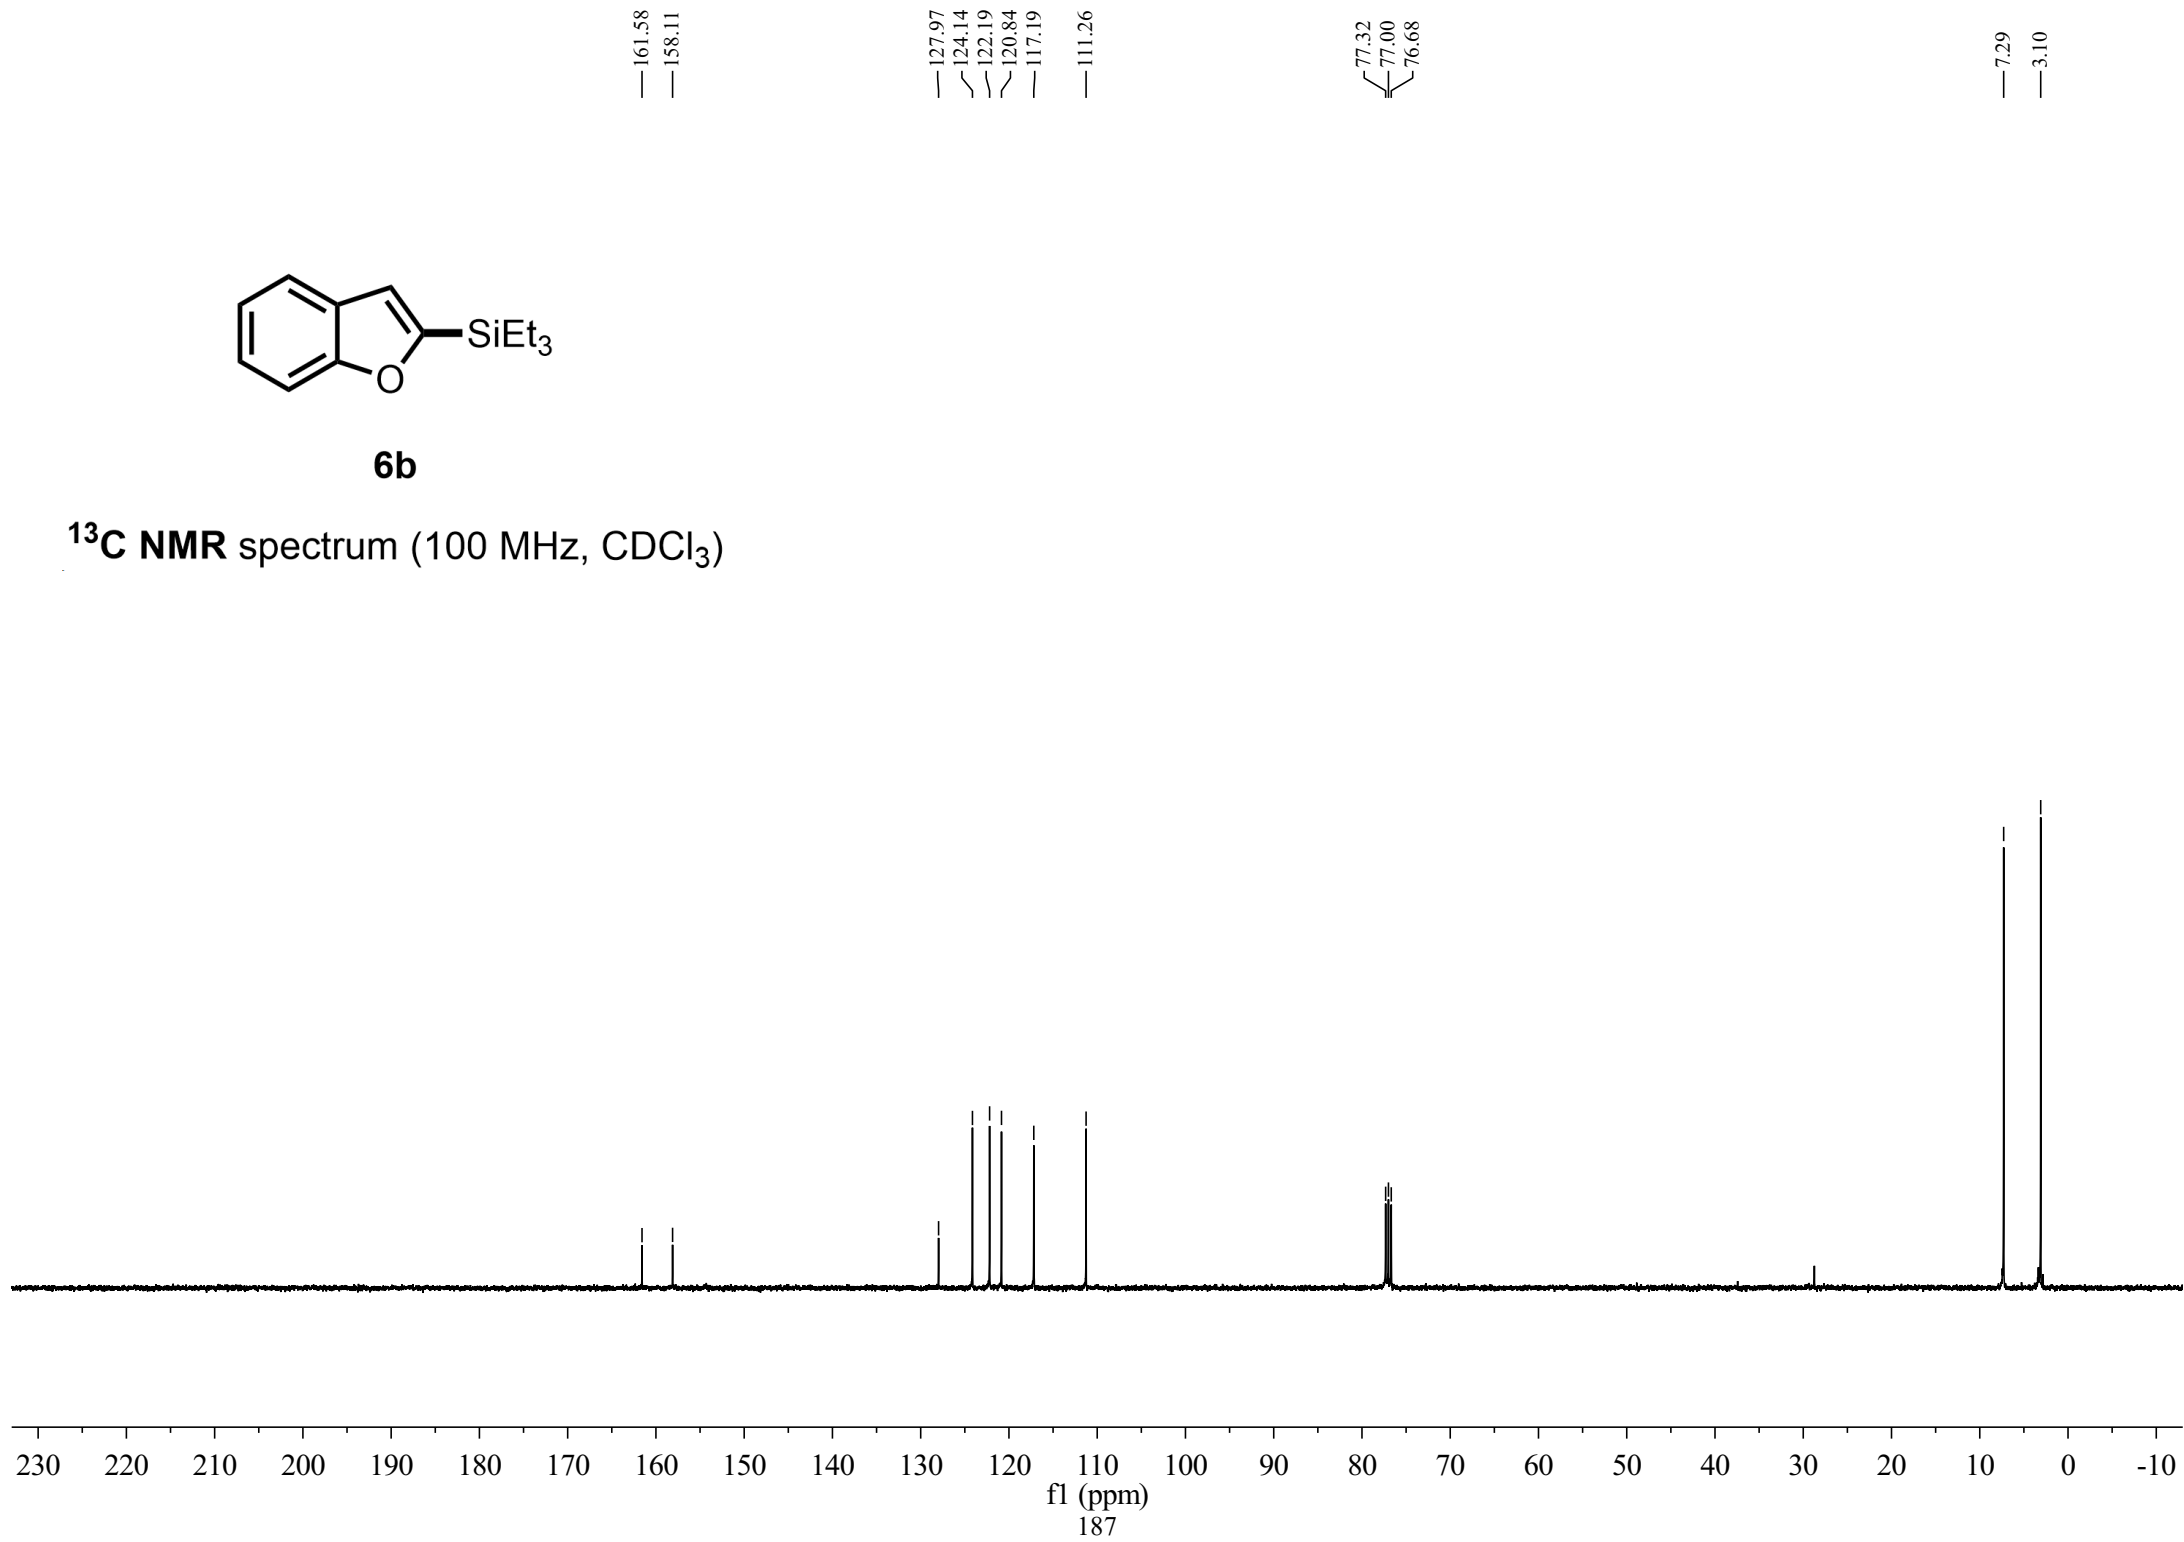

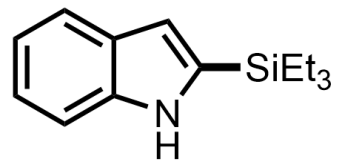

**6c**

<sup>1</sup>H NMR spectrum (400 MHz, CDCl<sub>3</sub>)

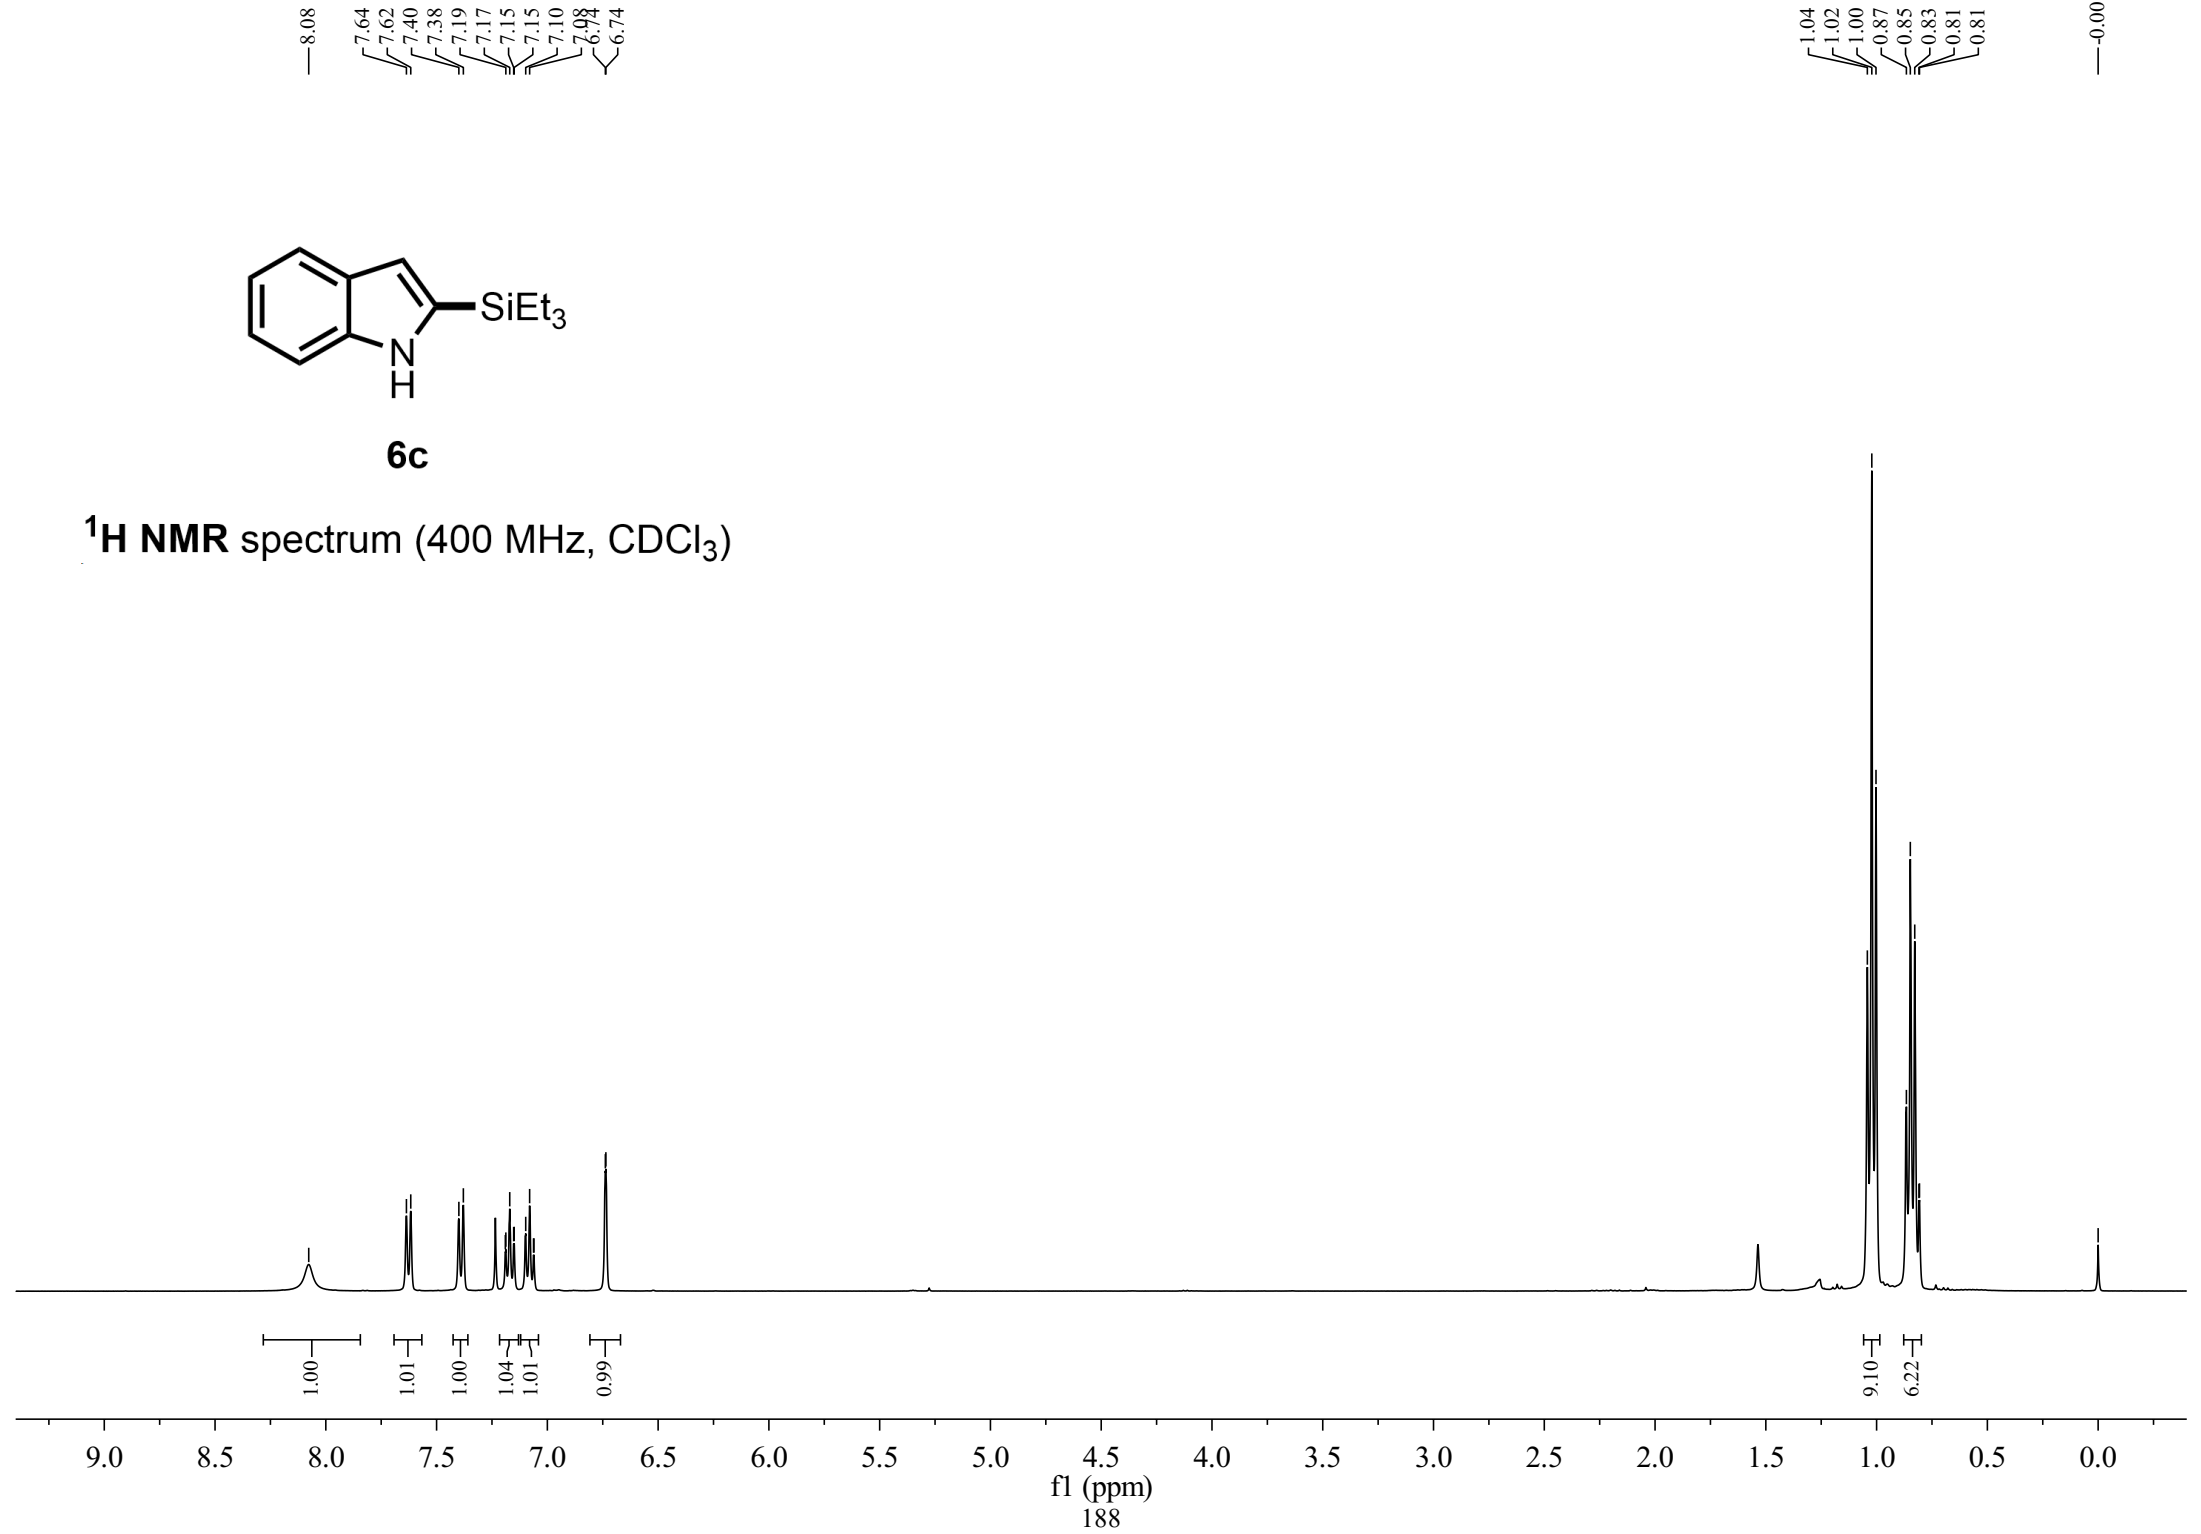

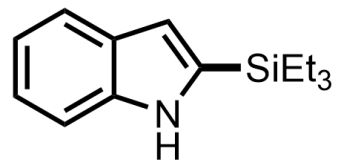

**6c**

<sup>13</sup>C NMR spectrum (100 MHz, CDCl<sub>3</sub>)

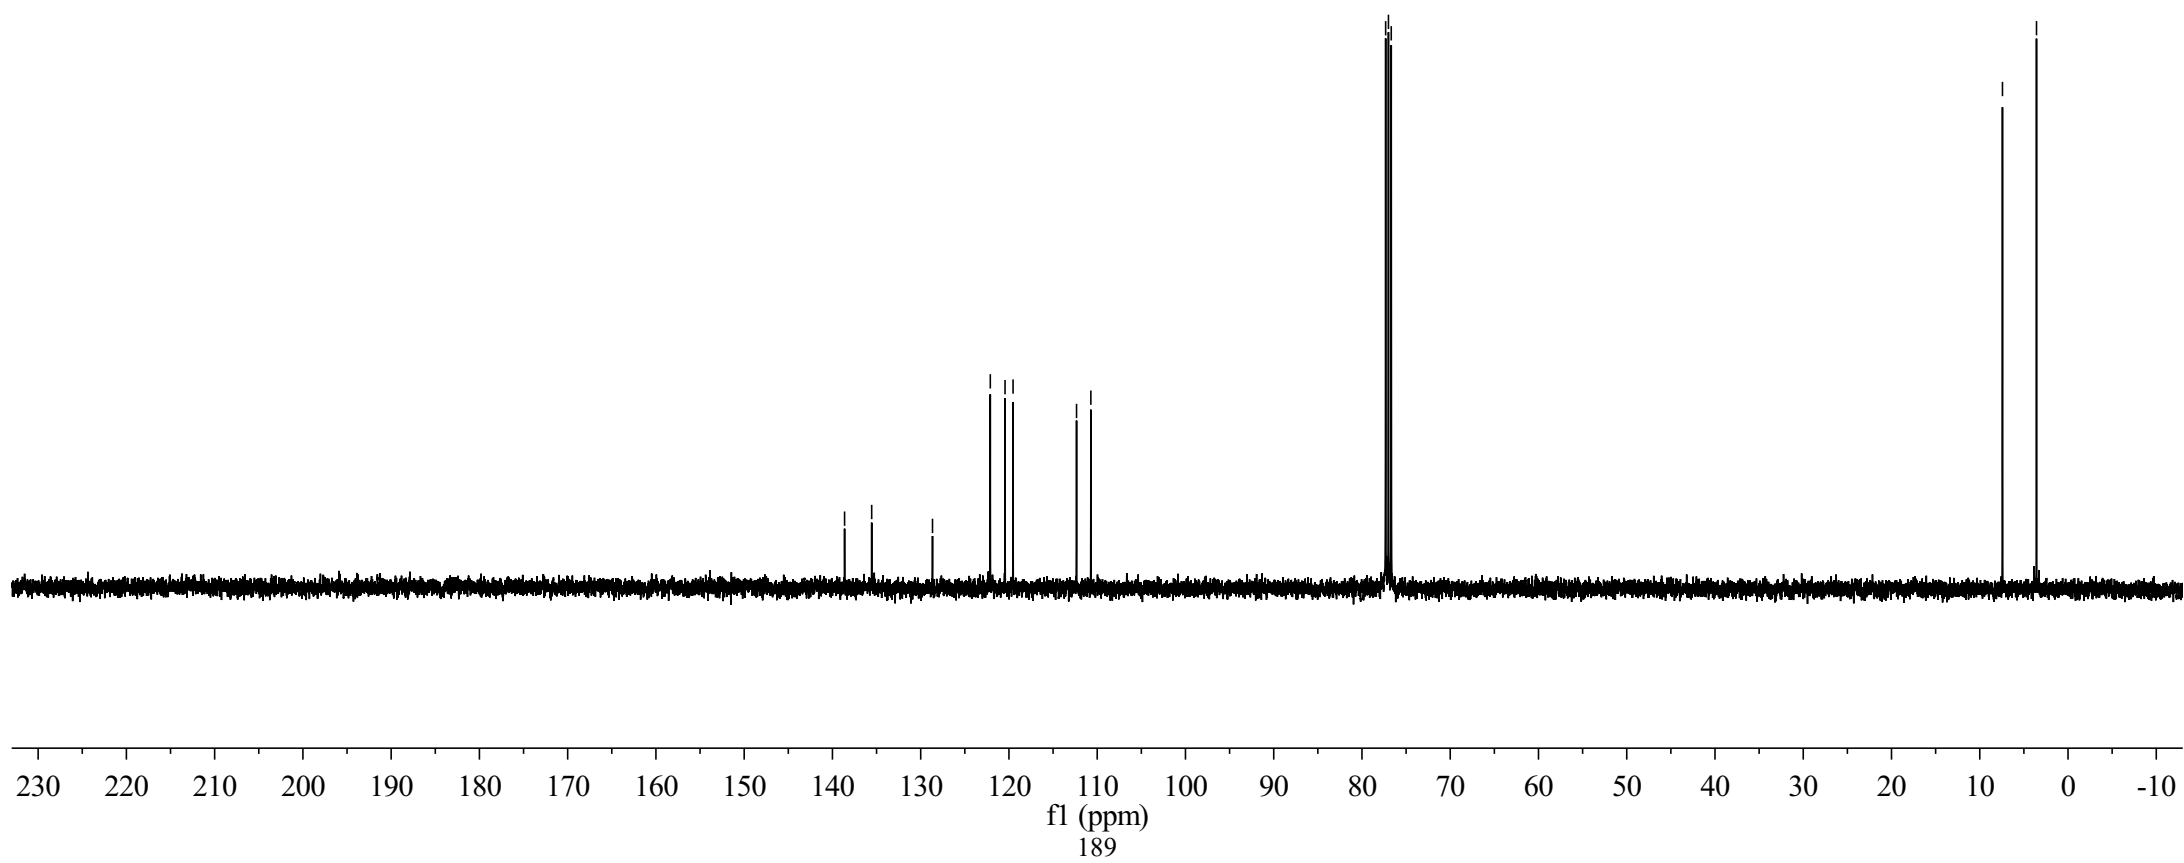

7.95  
7.93  
7.76  
7.74  
7.58  
7.56  
7.53  
7.30  
7.30  
7.28  
7.22  
7.20

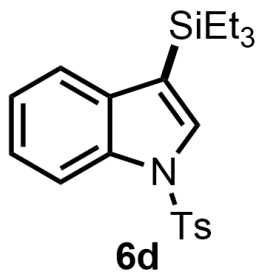

<sup>1</sup>H NMR spectrum (400 MHz, CDCl<sub>3</sub>)

2.33

0.96  
0.95  
0.94  
0.93  
0.88  
0.88  
0.86  
0.84  
0.84  
0.83

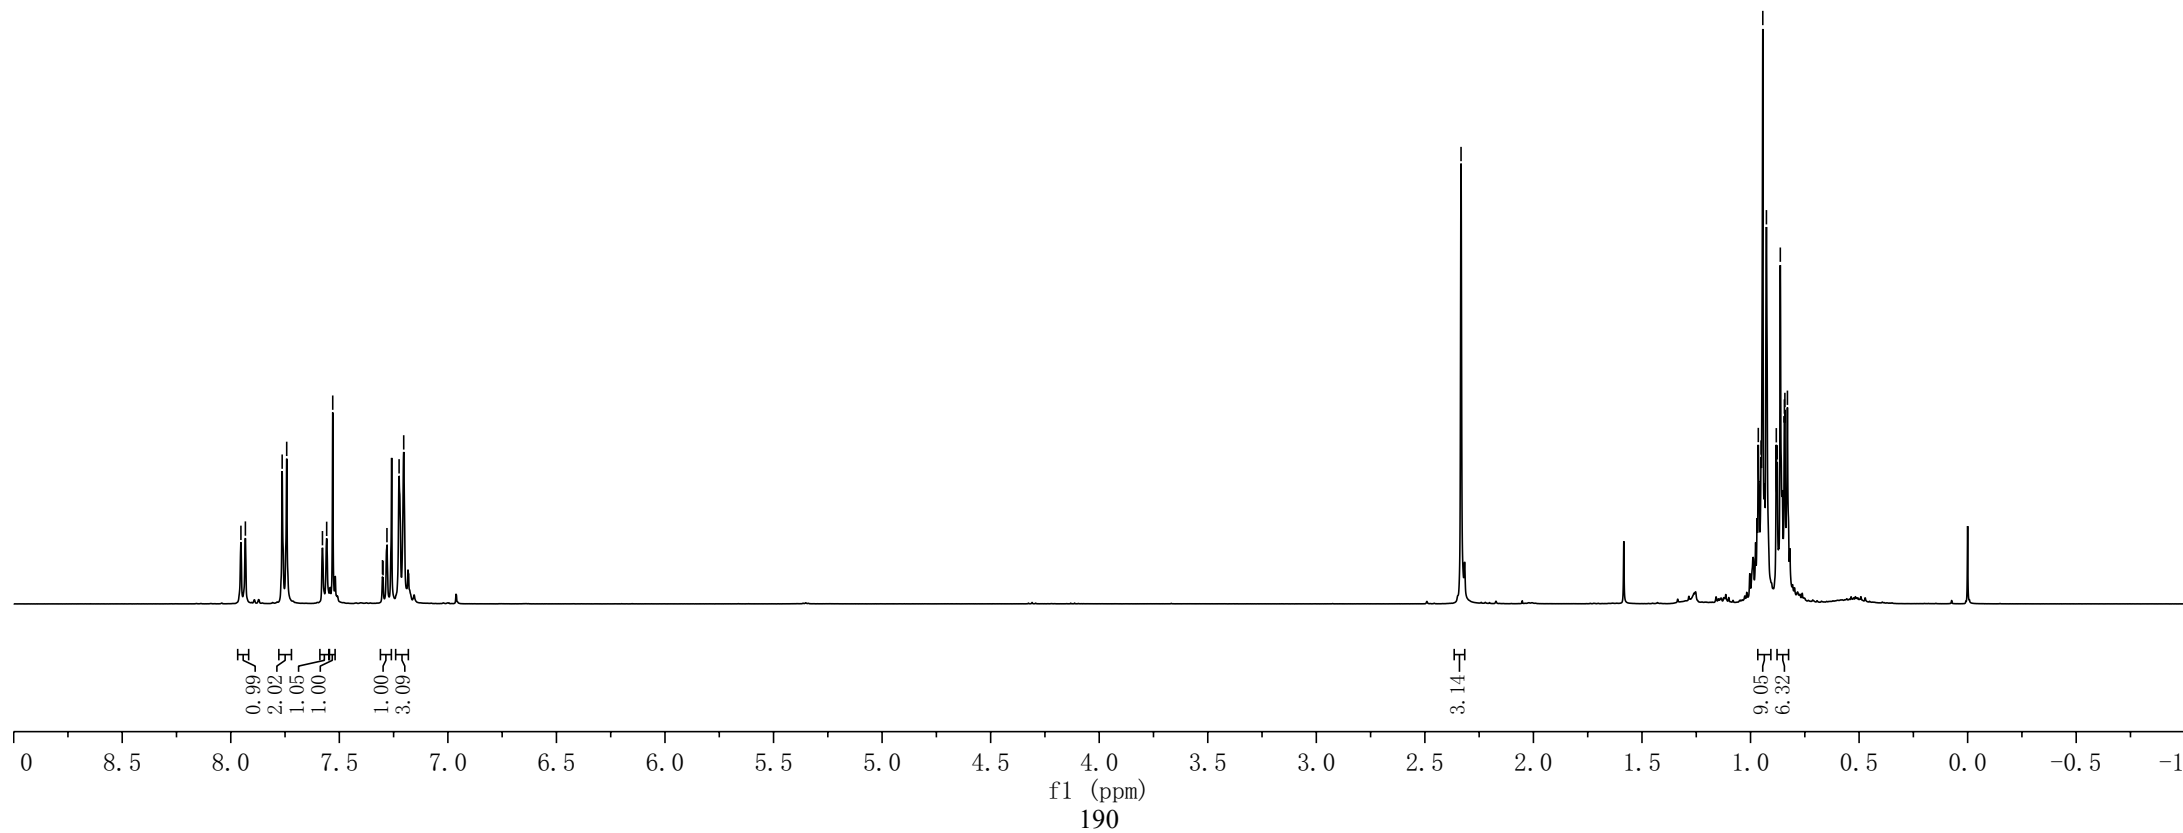

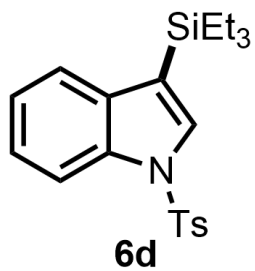

144.82  
135.82  
135.16  
135.01  
132.54  
129.81  
126.76  
124.15  
122.97  
122.41  
115.09  
113.44

77.32  
77.00  
76.68

21.55

7.43  
3.63

**<sup>13</sup>C NMR spectrum (100 MHz, CDCl<sub>3</sub>)**

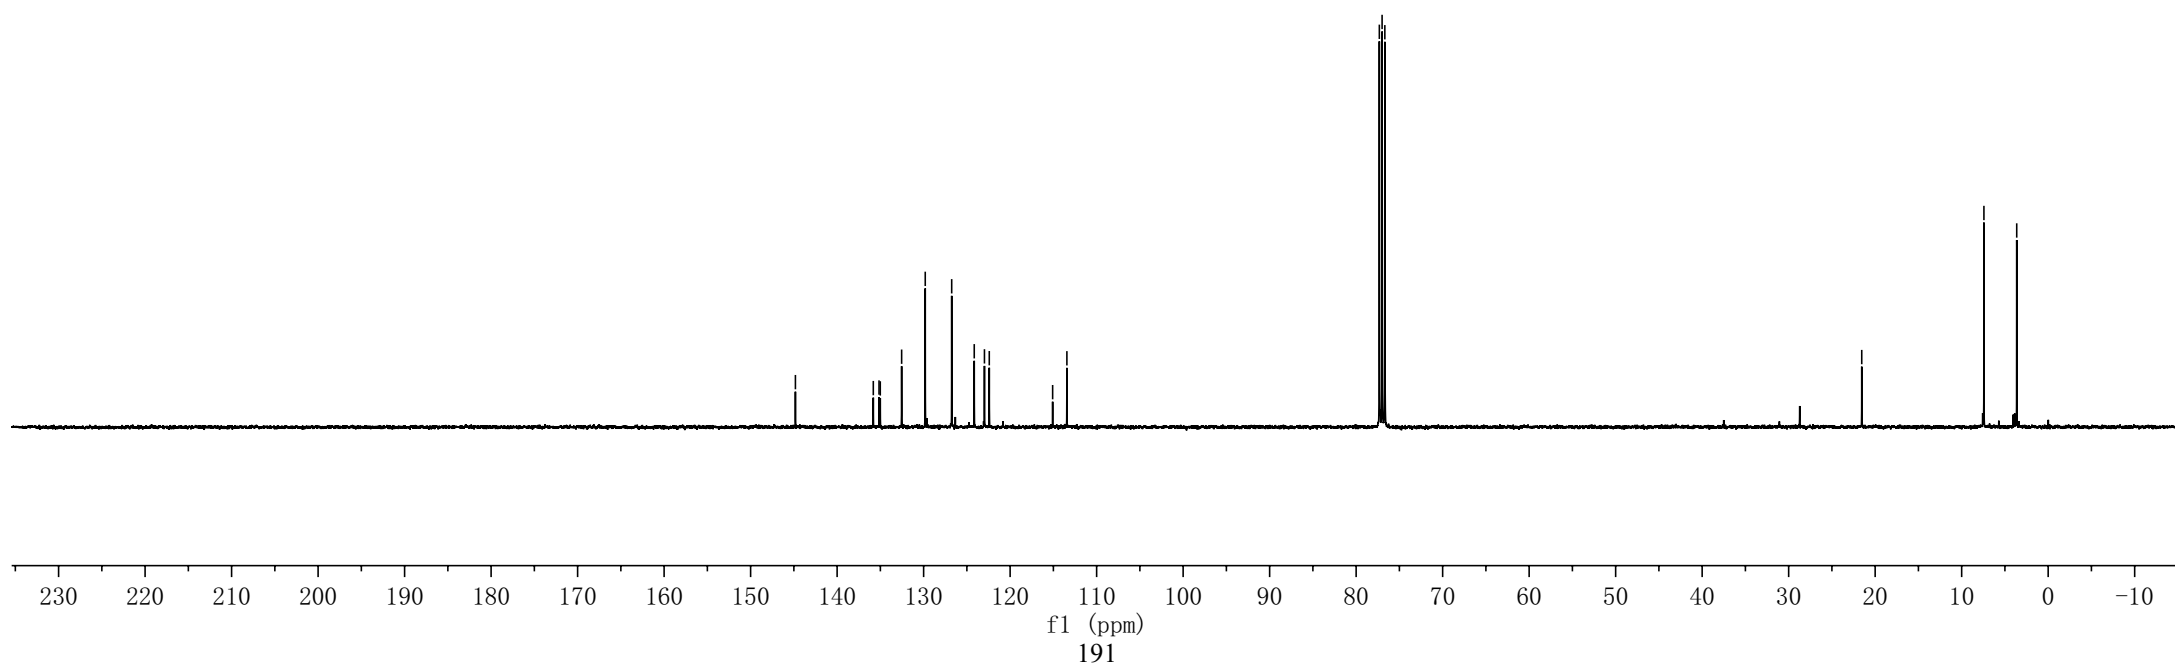

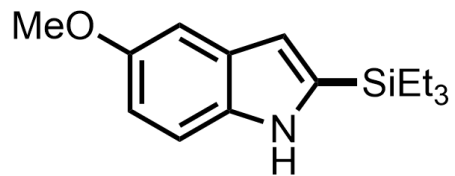

**6e**

**<sup>1</sup>H NMR spectrum (400 MHz, CDCl<sub>3</sub>)**

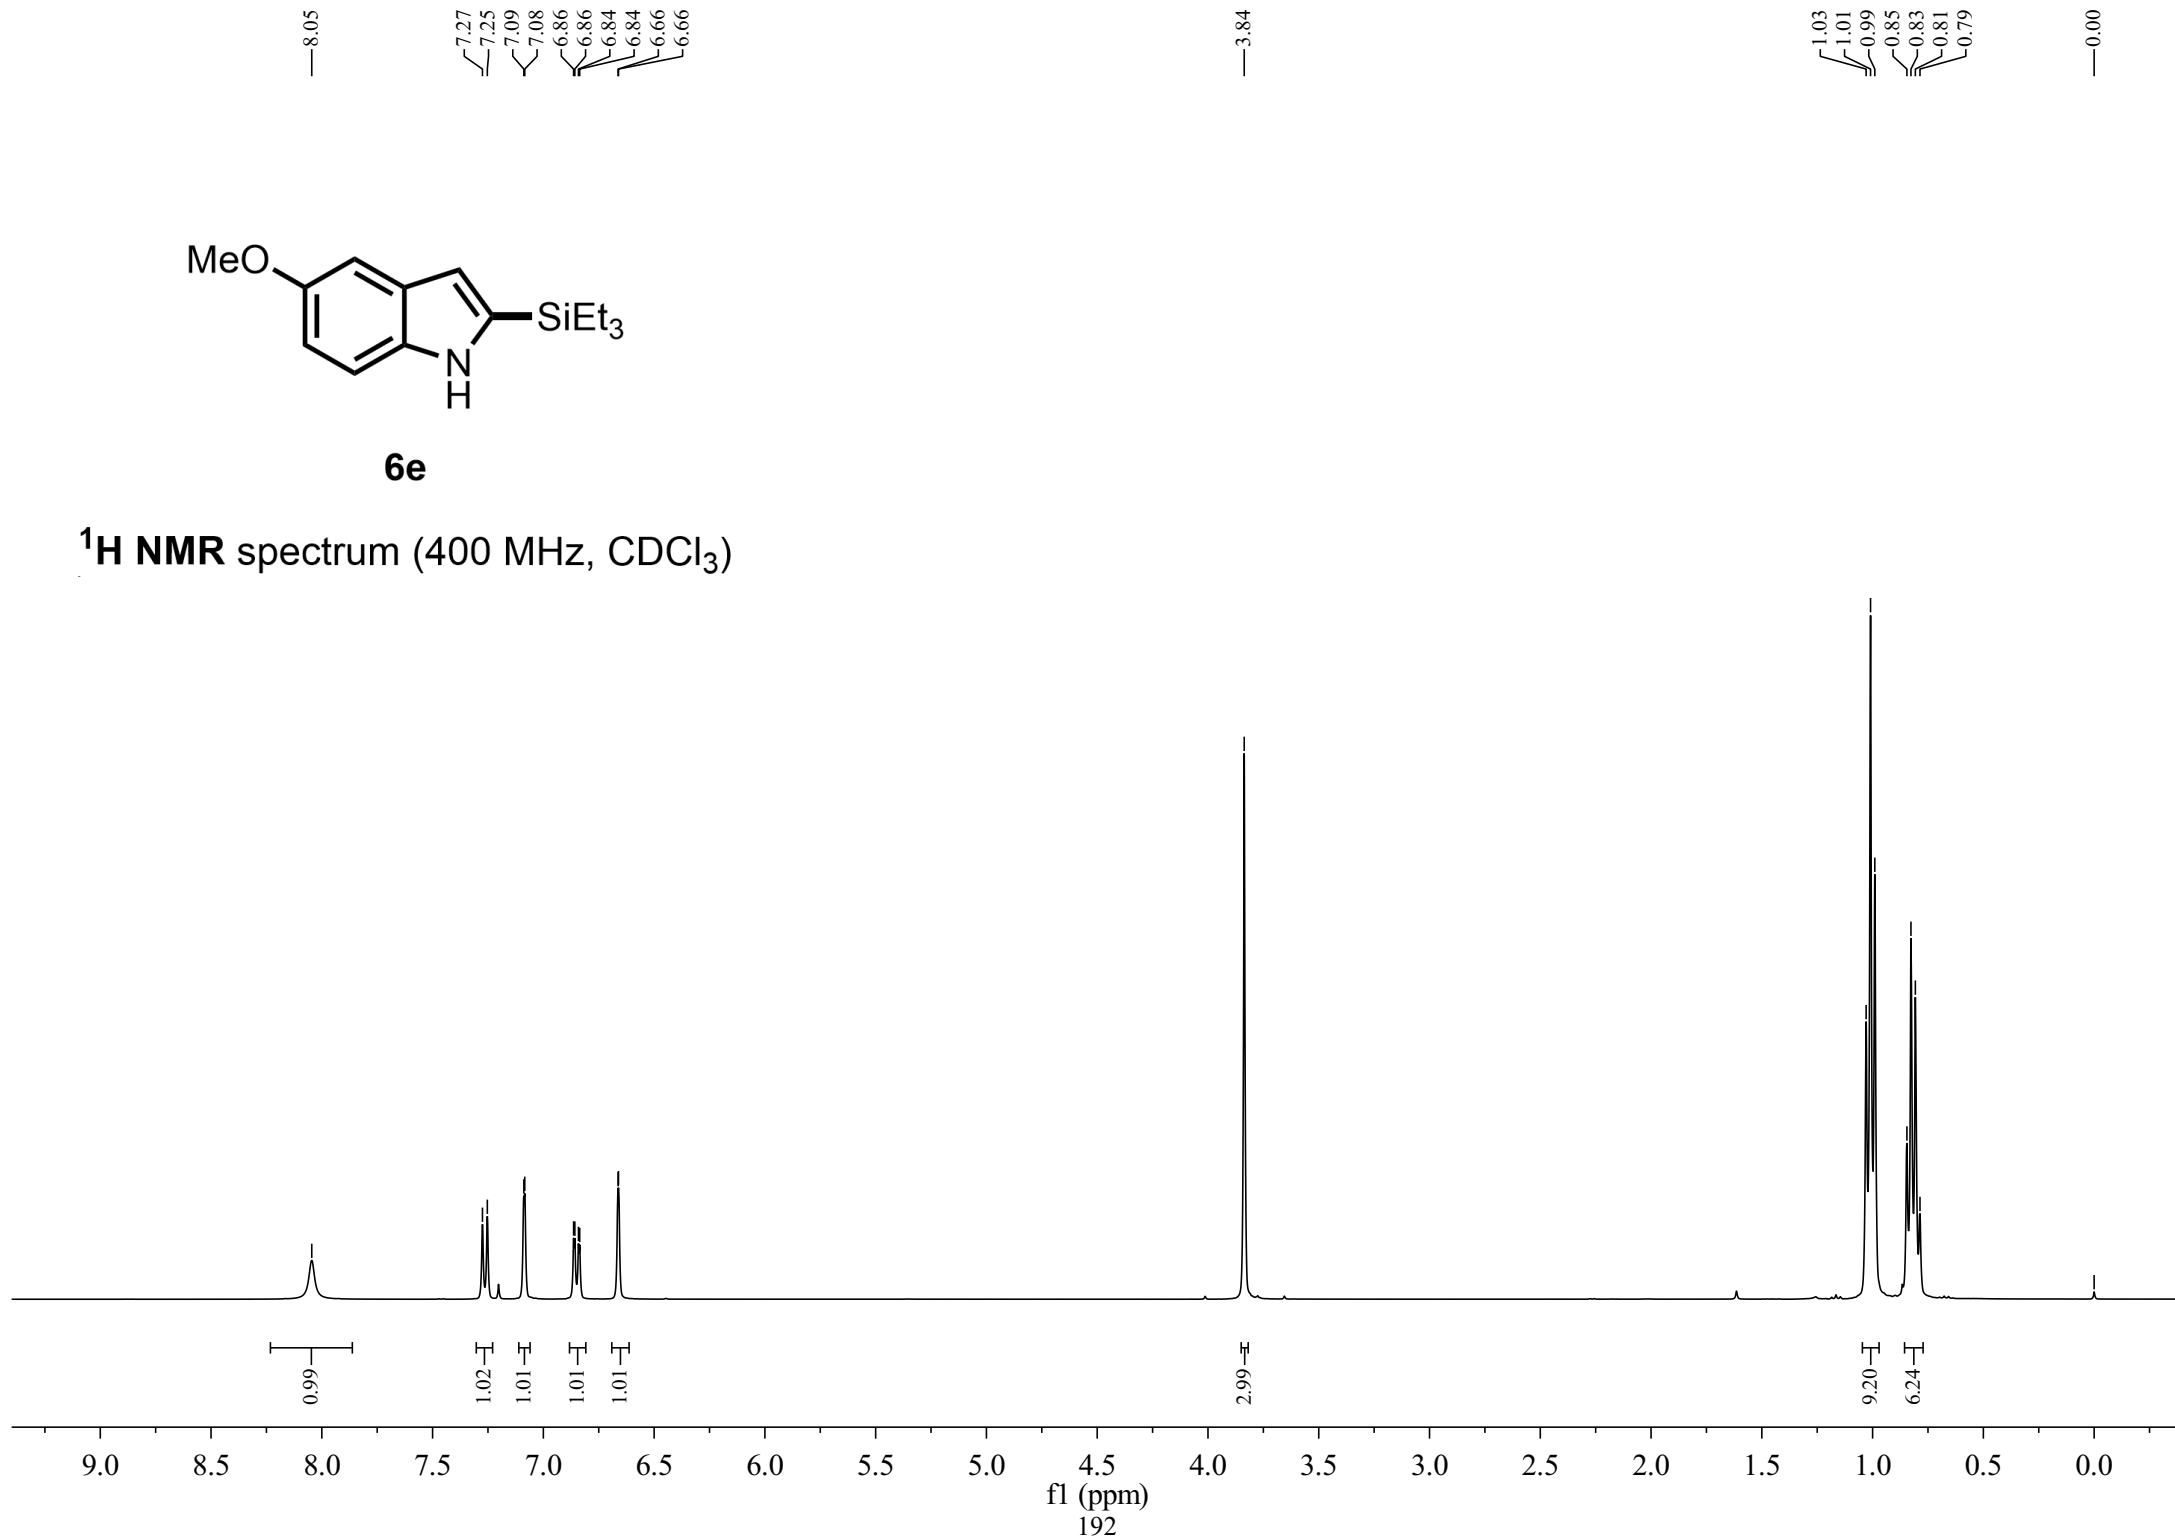



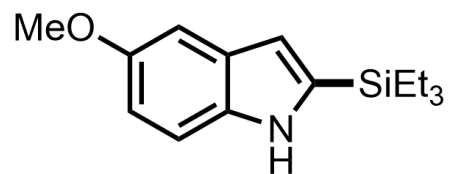

**6e**

<sup>13</sup>C NMR spectrum (100 MHz, CDCl<sub>3</sub>)

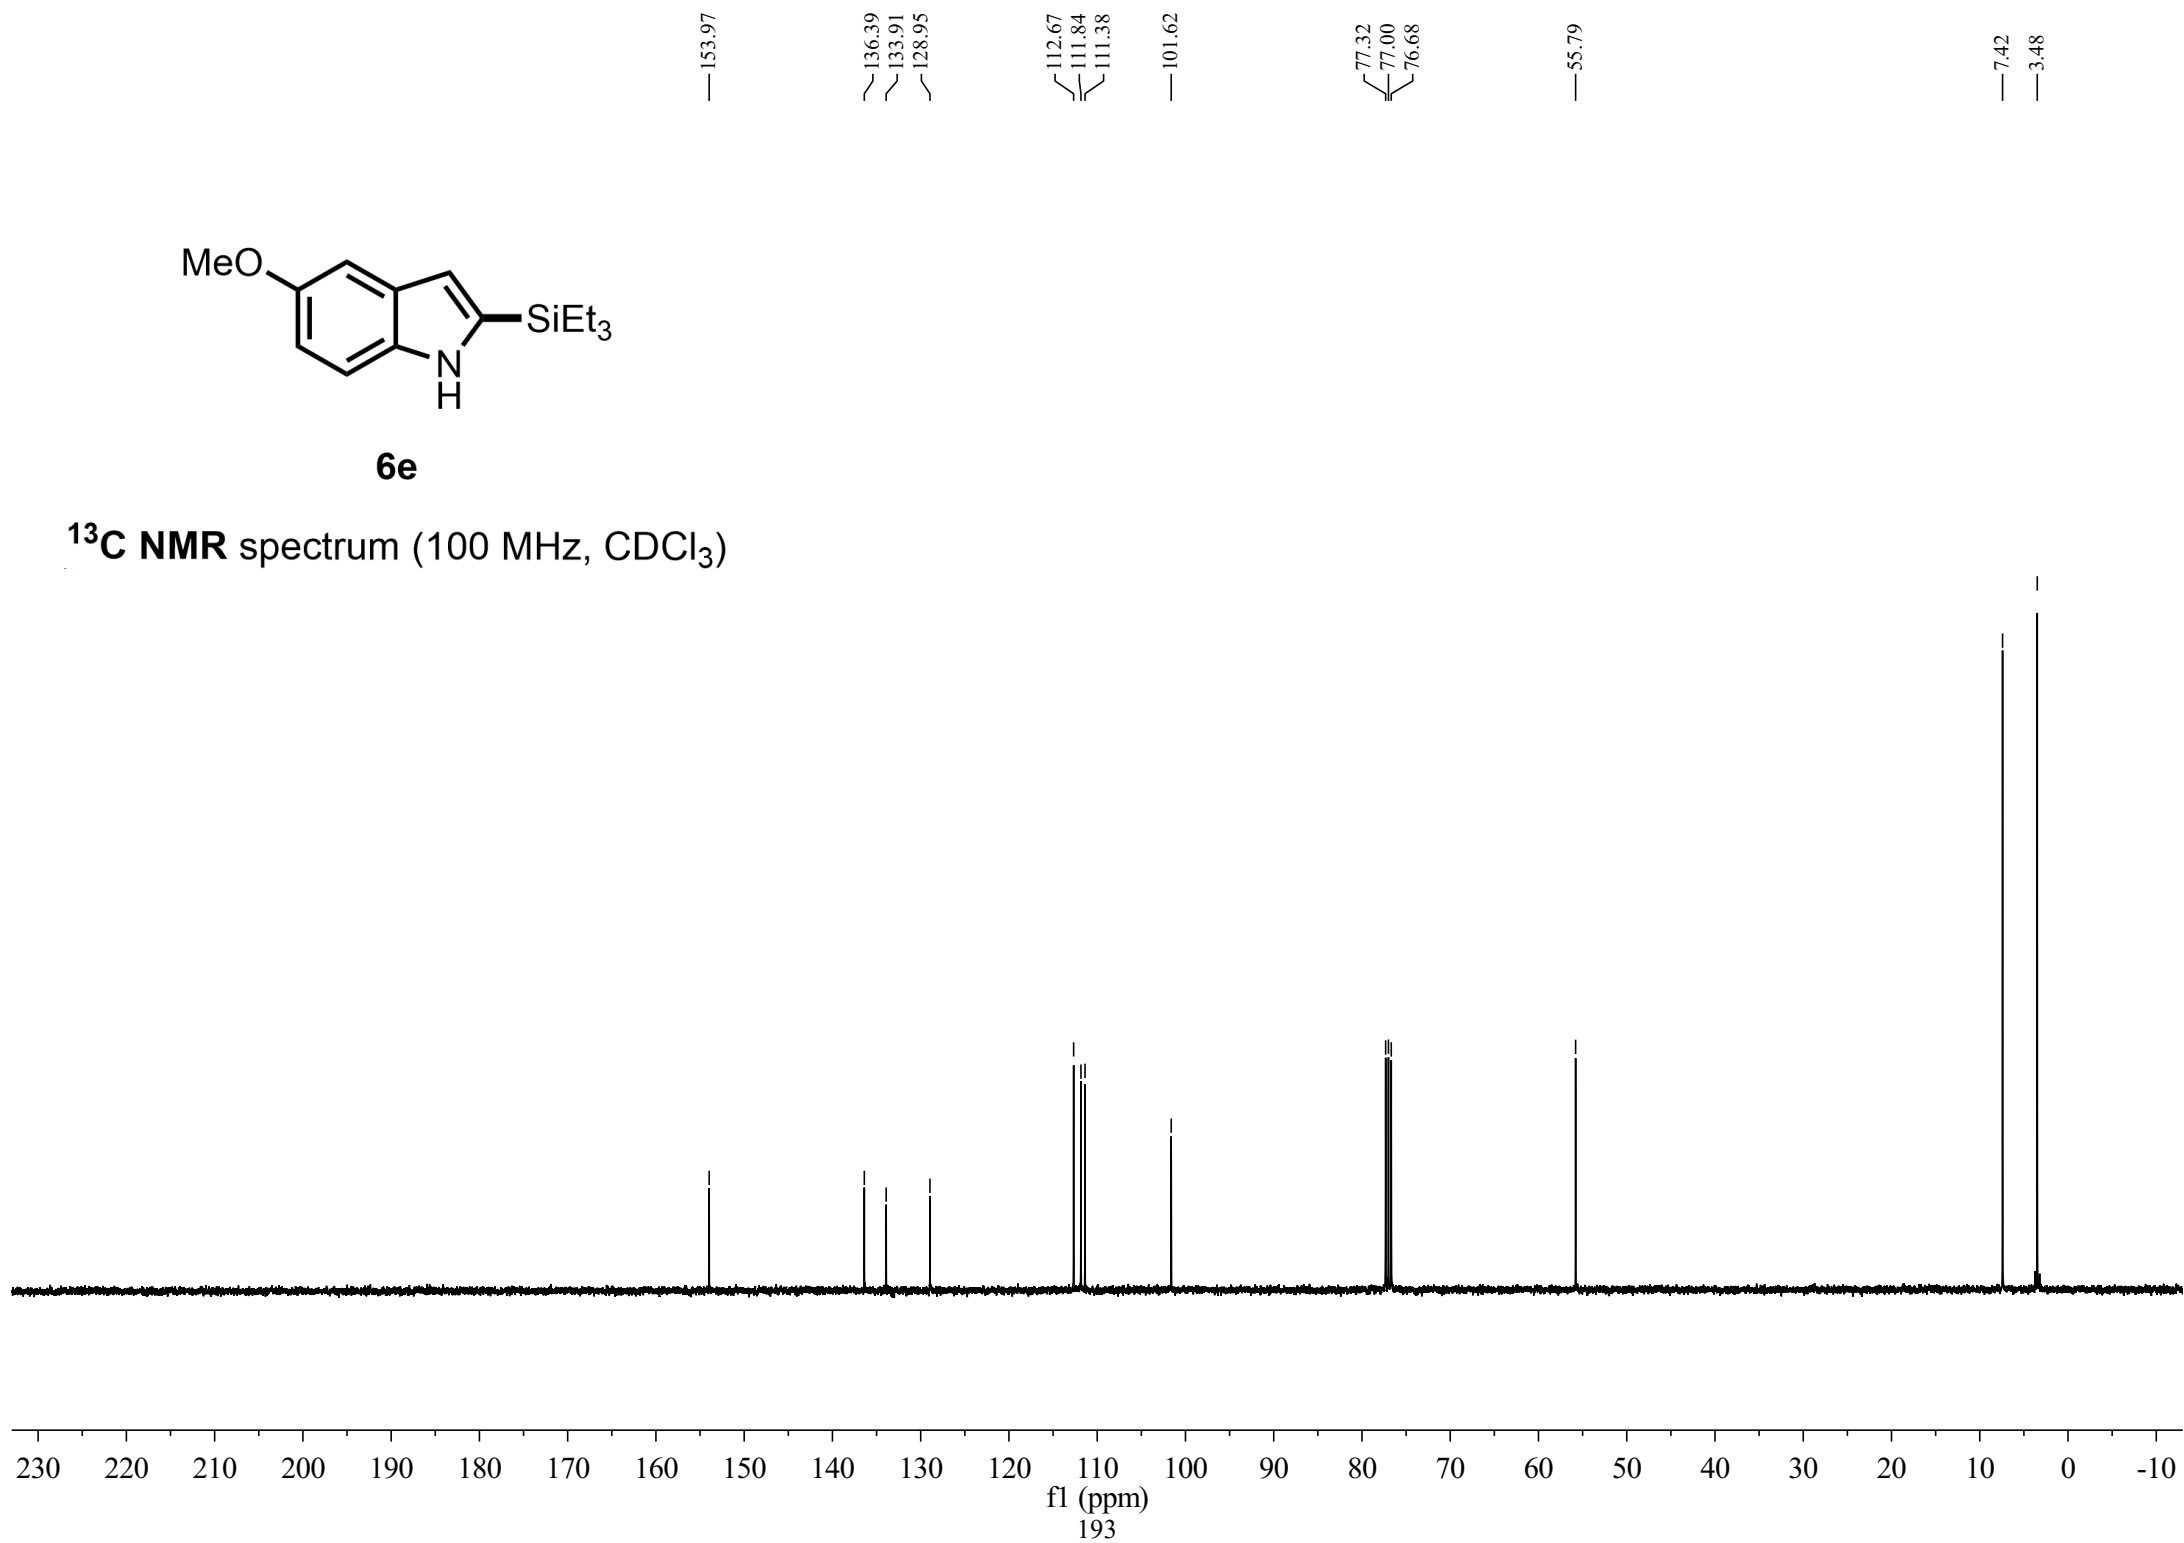

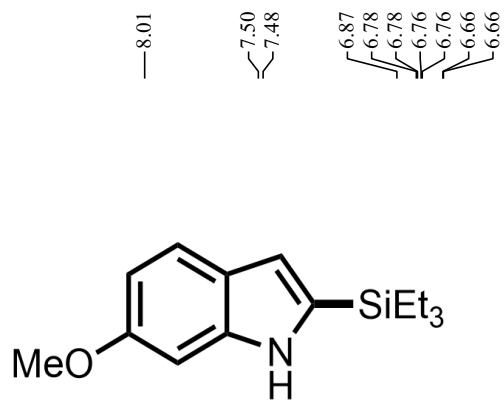

**6f**

<sup>1</sup>H NMR spectrum (400 MHz, CDCl<sub>3</sub>)

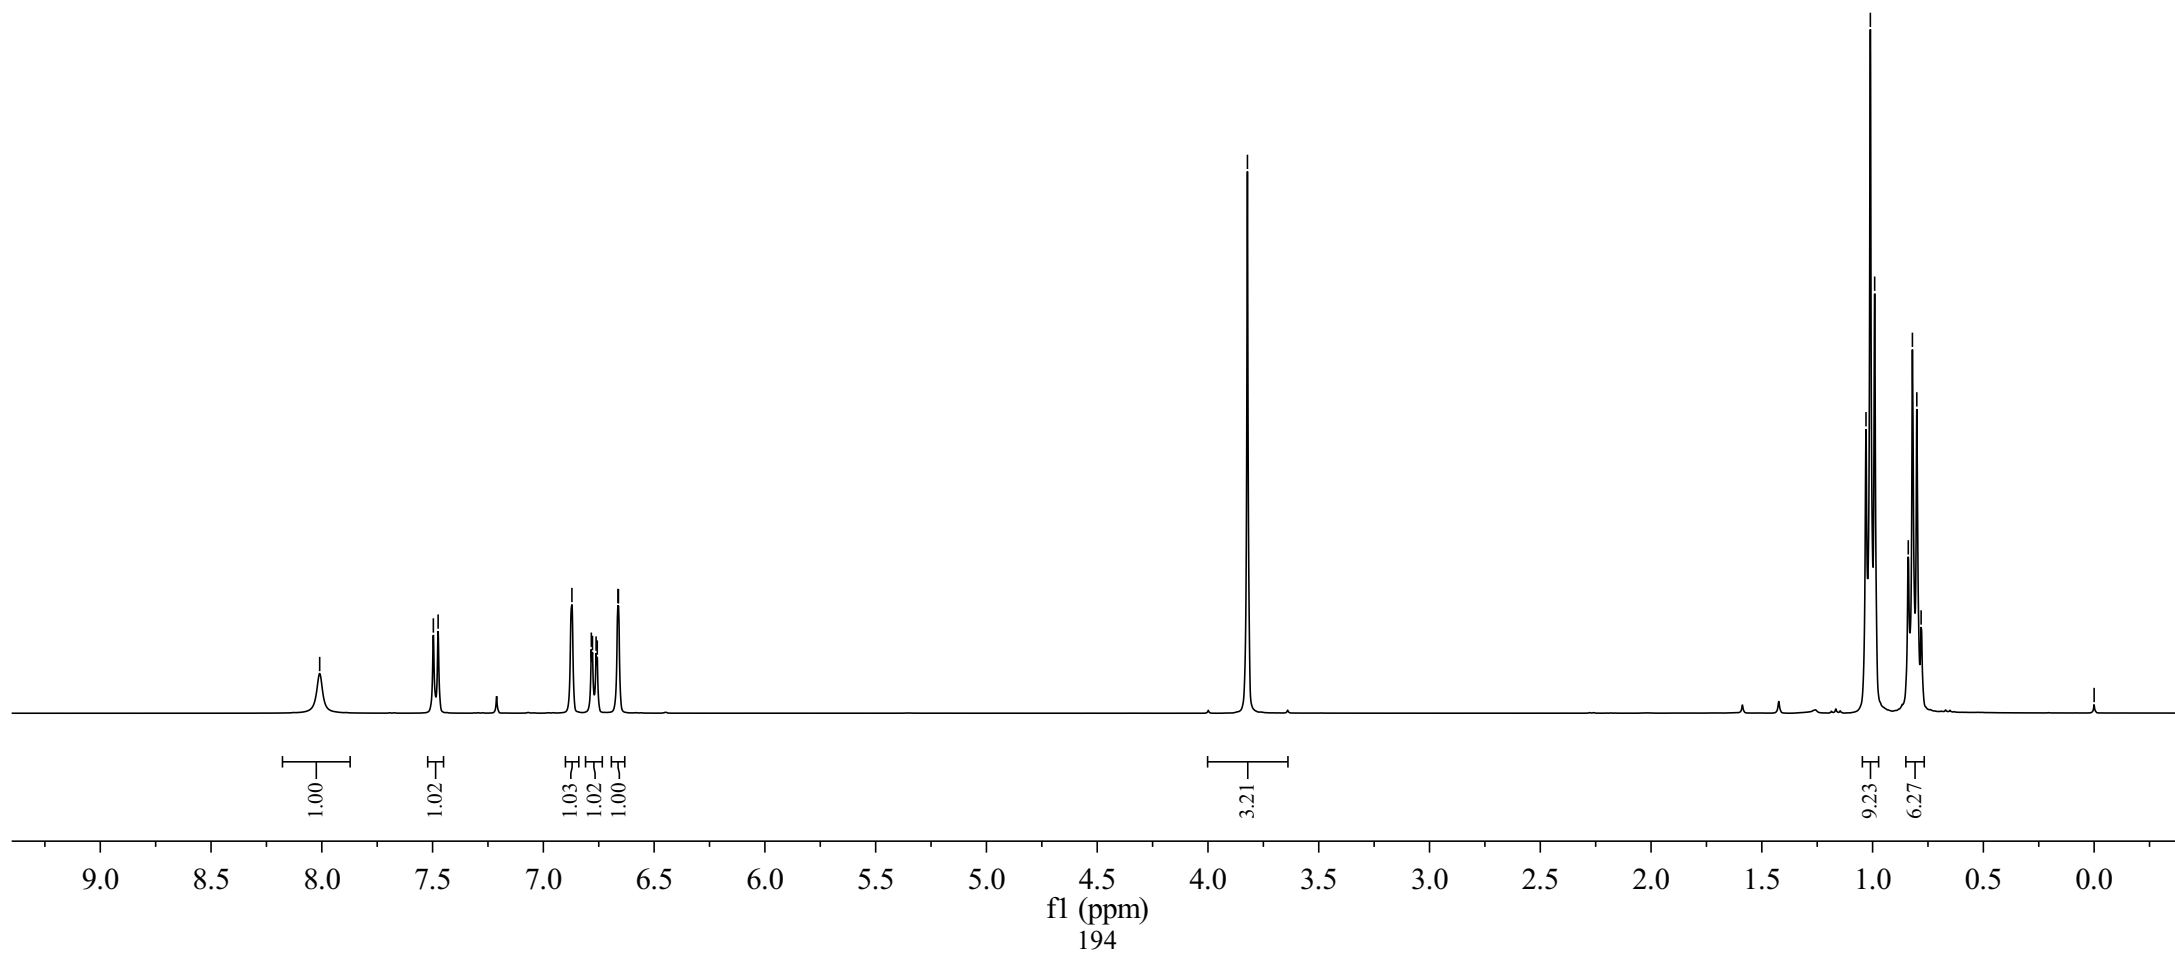

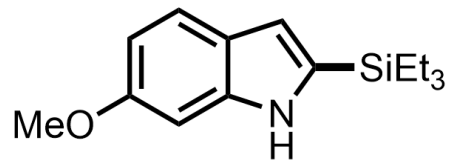

6f

<sup>13</sup>C NMR spectrum (100 MHz, CDCl<sub>3</sub>)

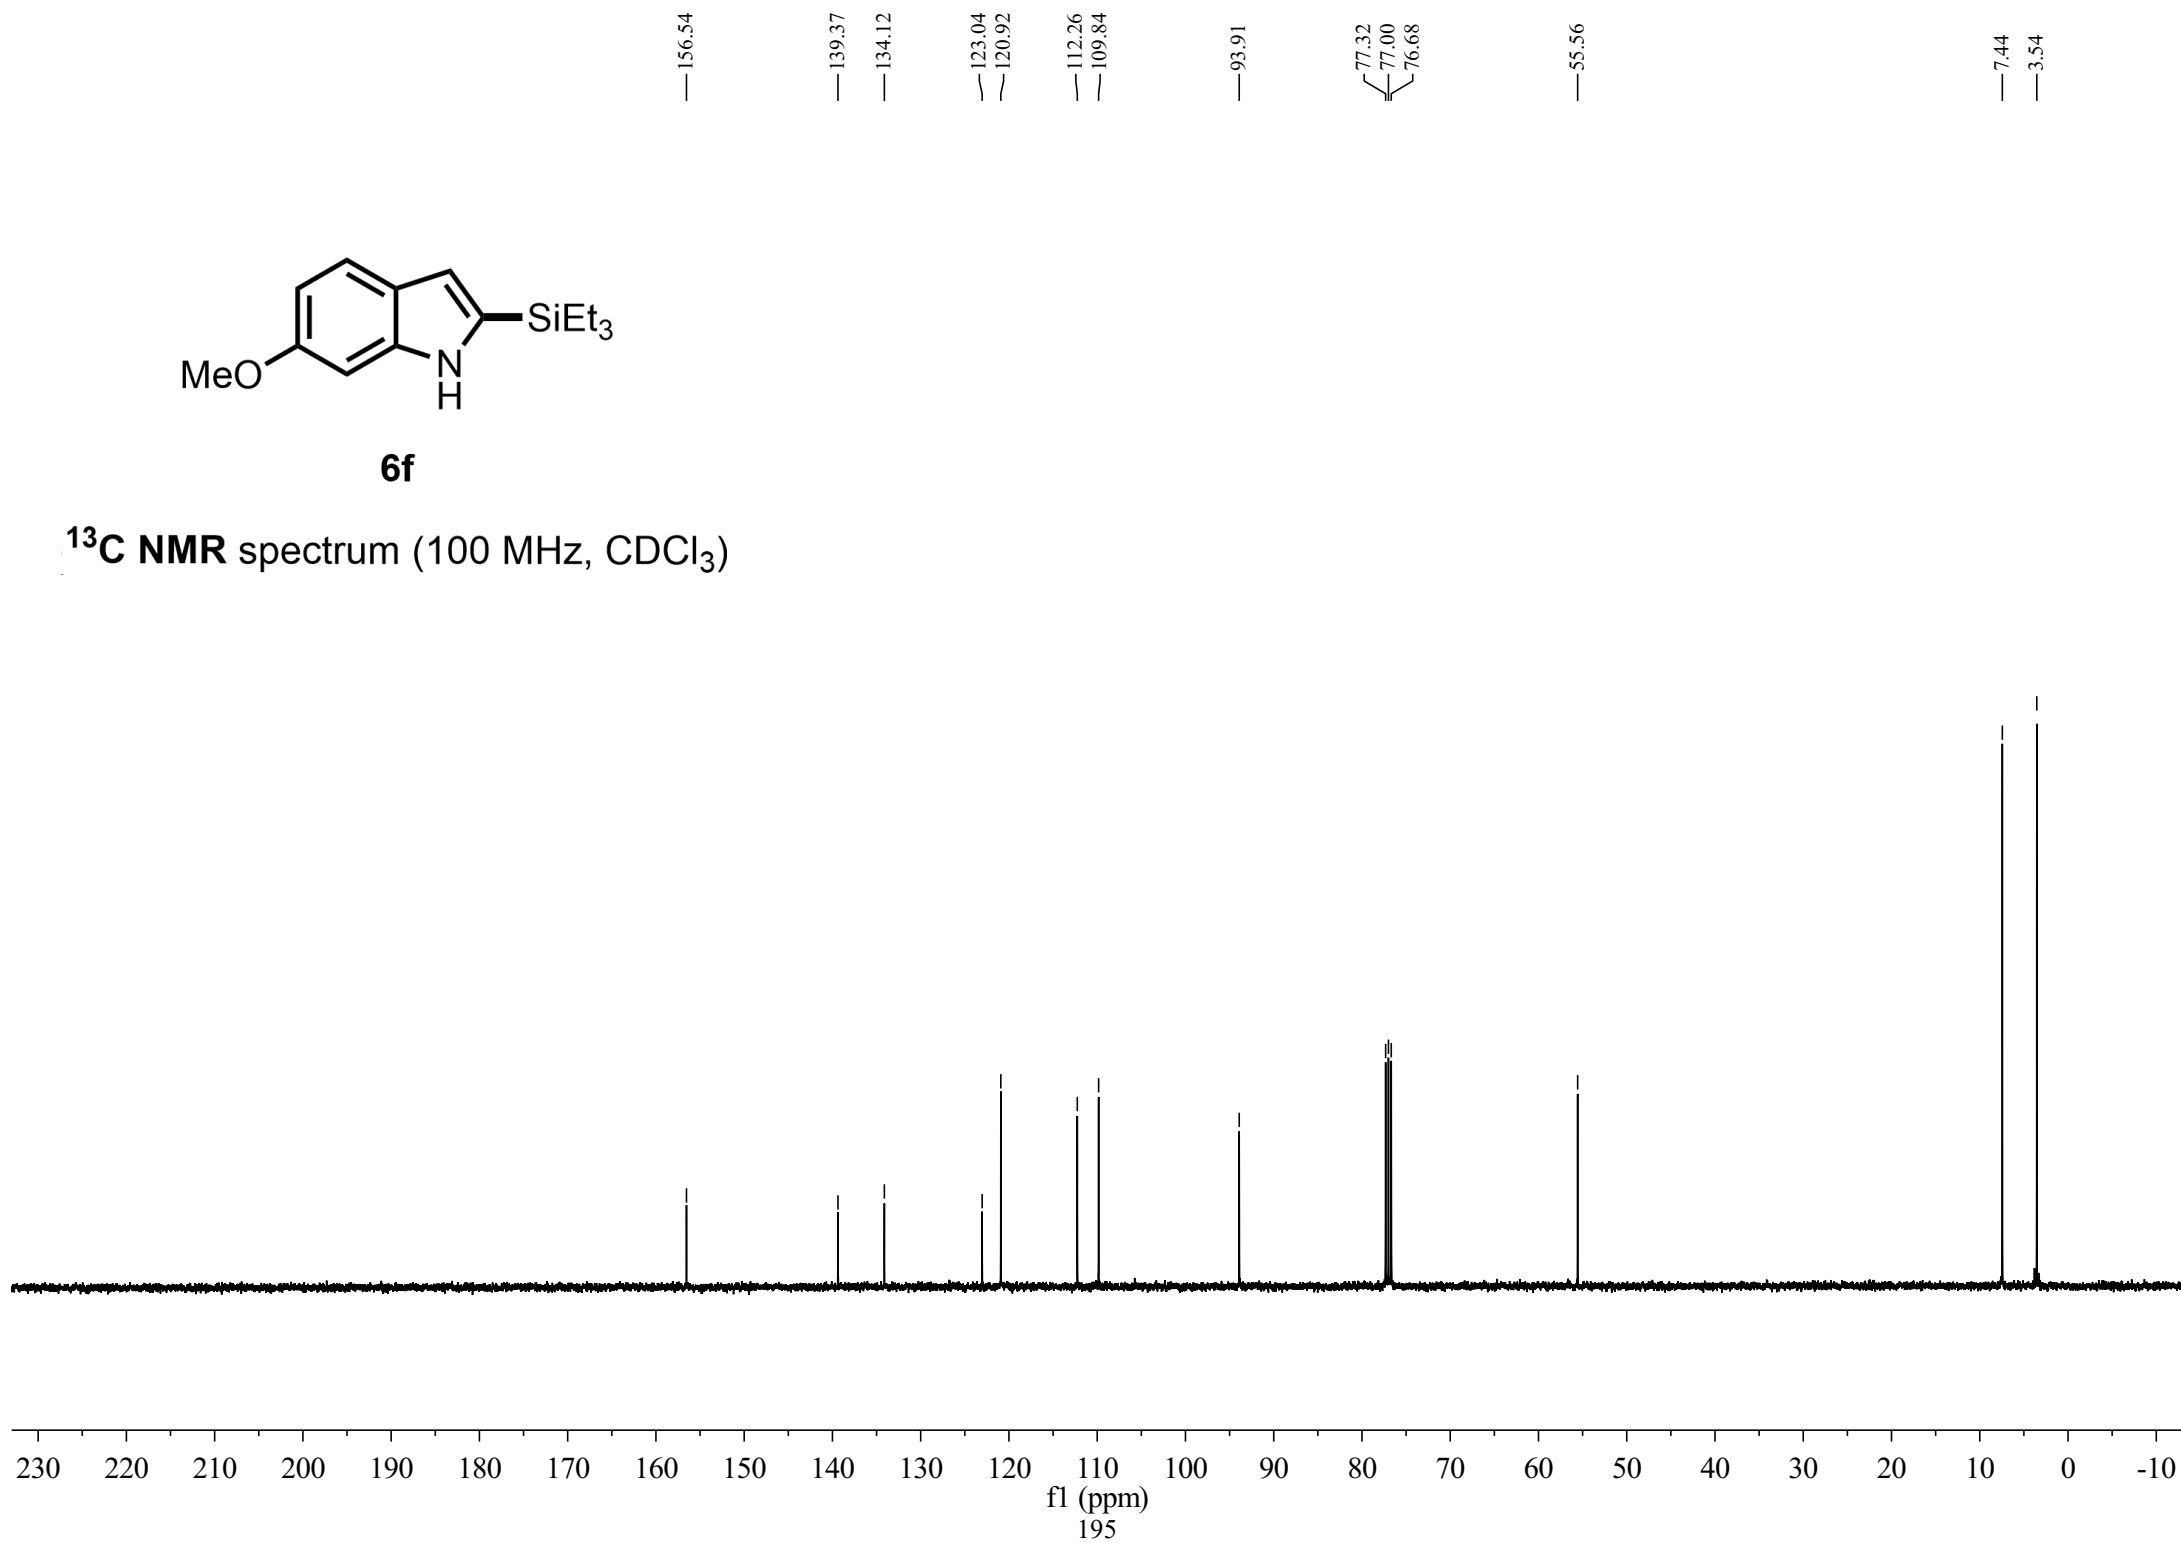

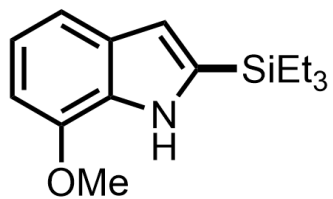

**6g**

<sup>1</sup>H NMR spectrum (400 MHz, CDCl<sub>3</sub>)

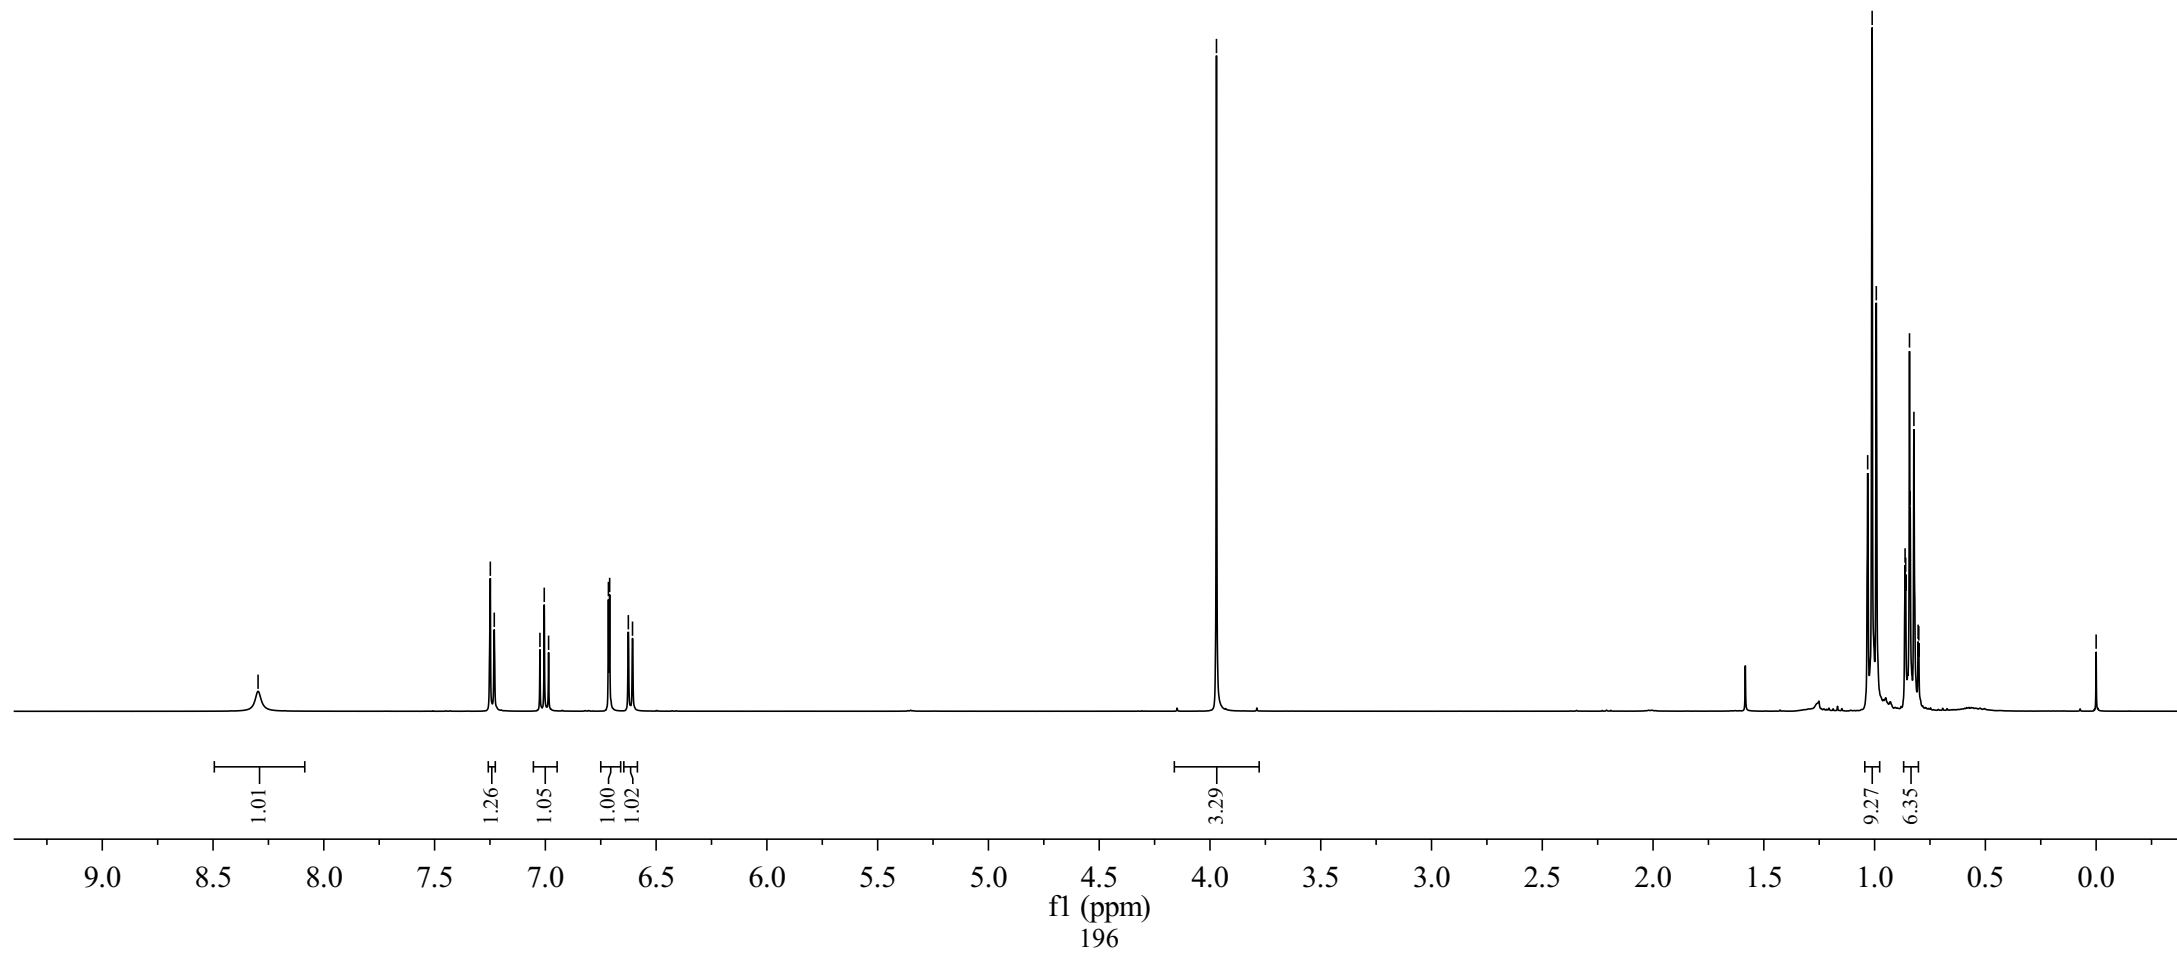

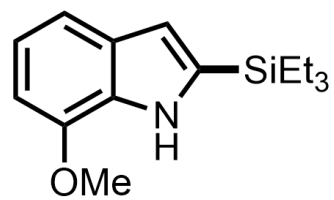

**6g**

<sup>13</sup>C NMR spectrum (100 MHz, CDCl<sub>3</sub>)

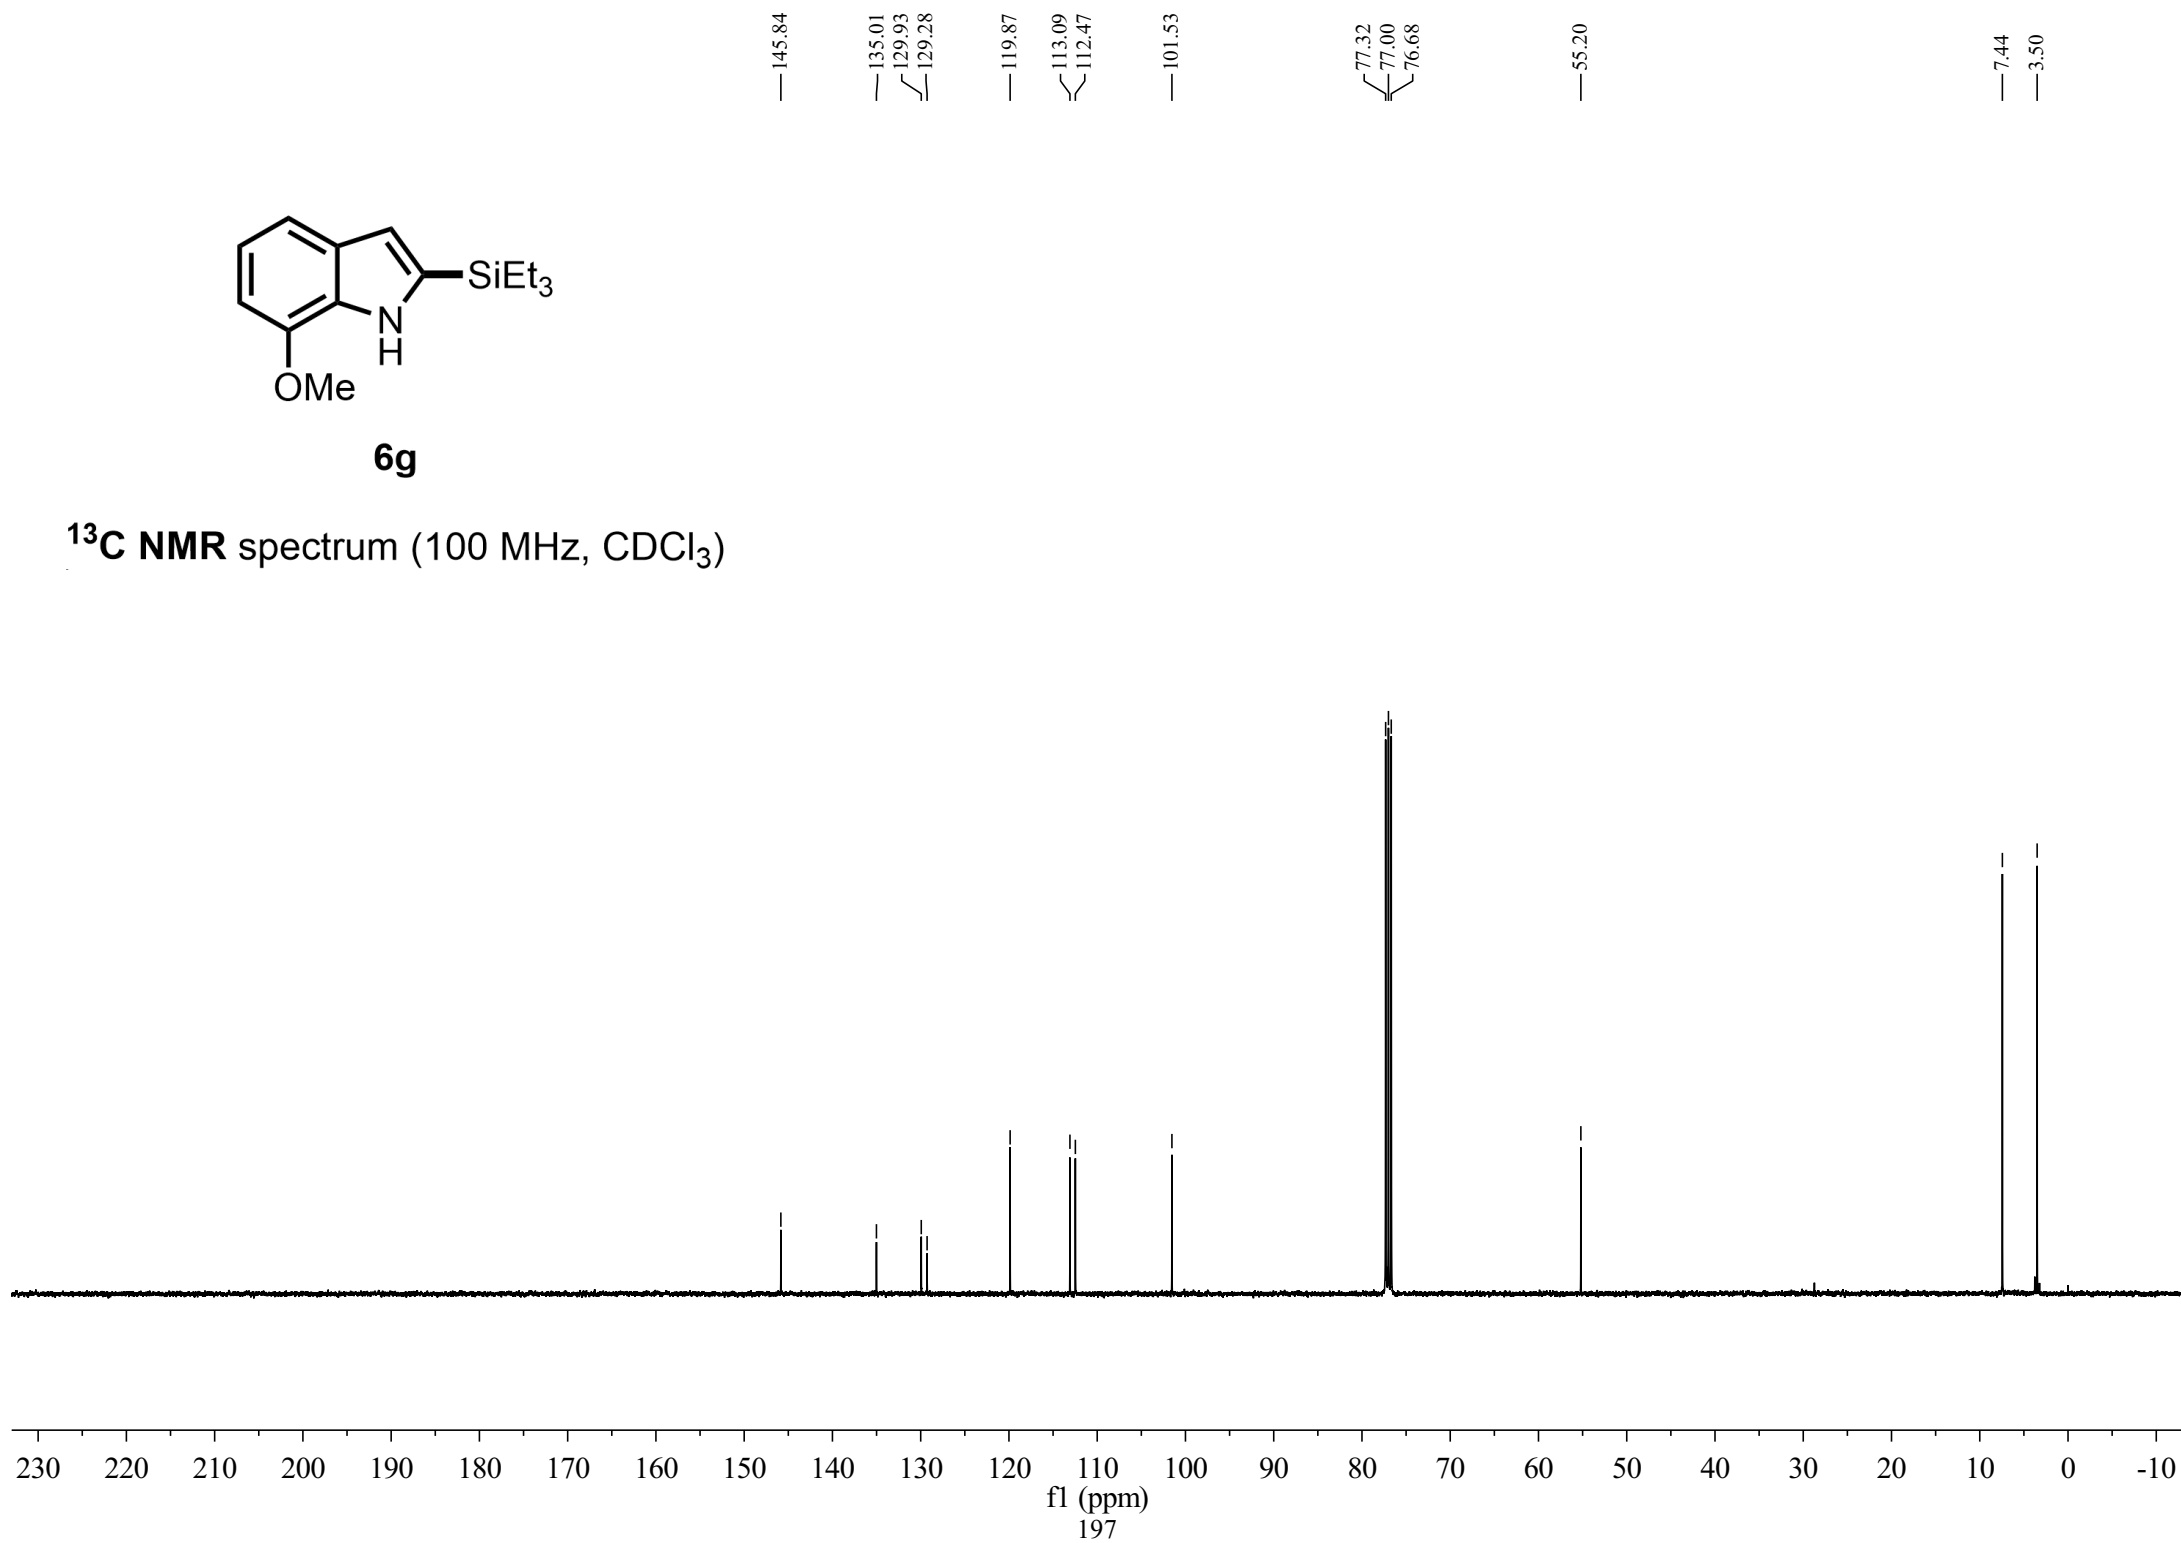

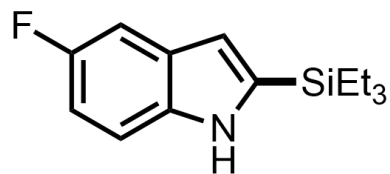

**6h**

**<sup>1</sup>H NMR spectrum (400 MHz, CDCl<sub>3</sub>)**

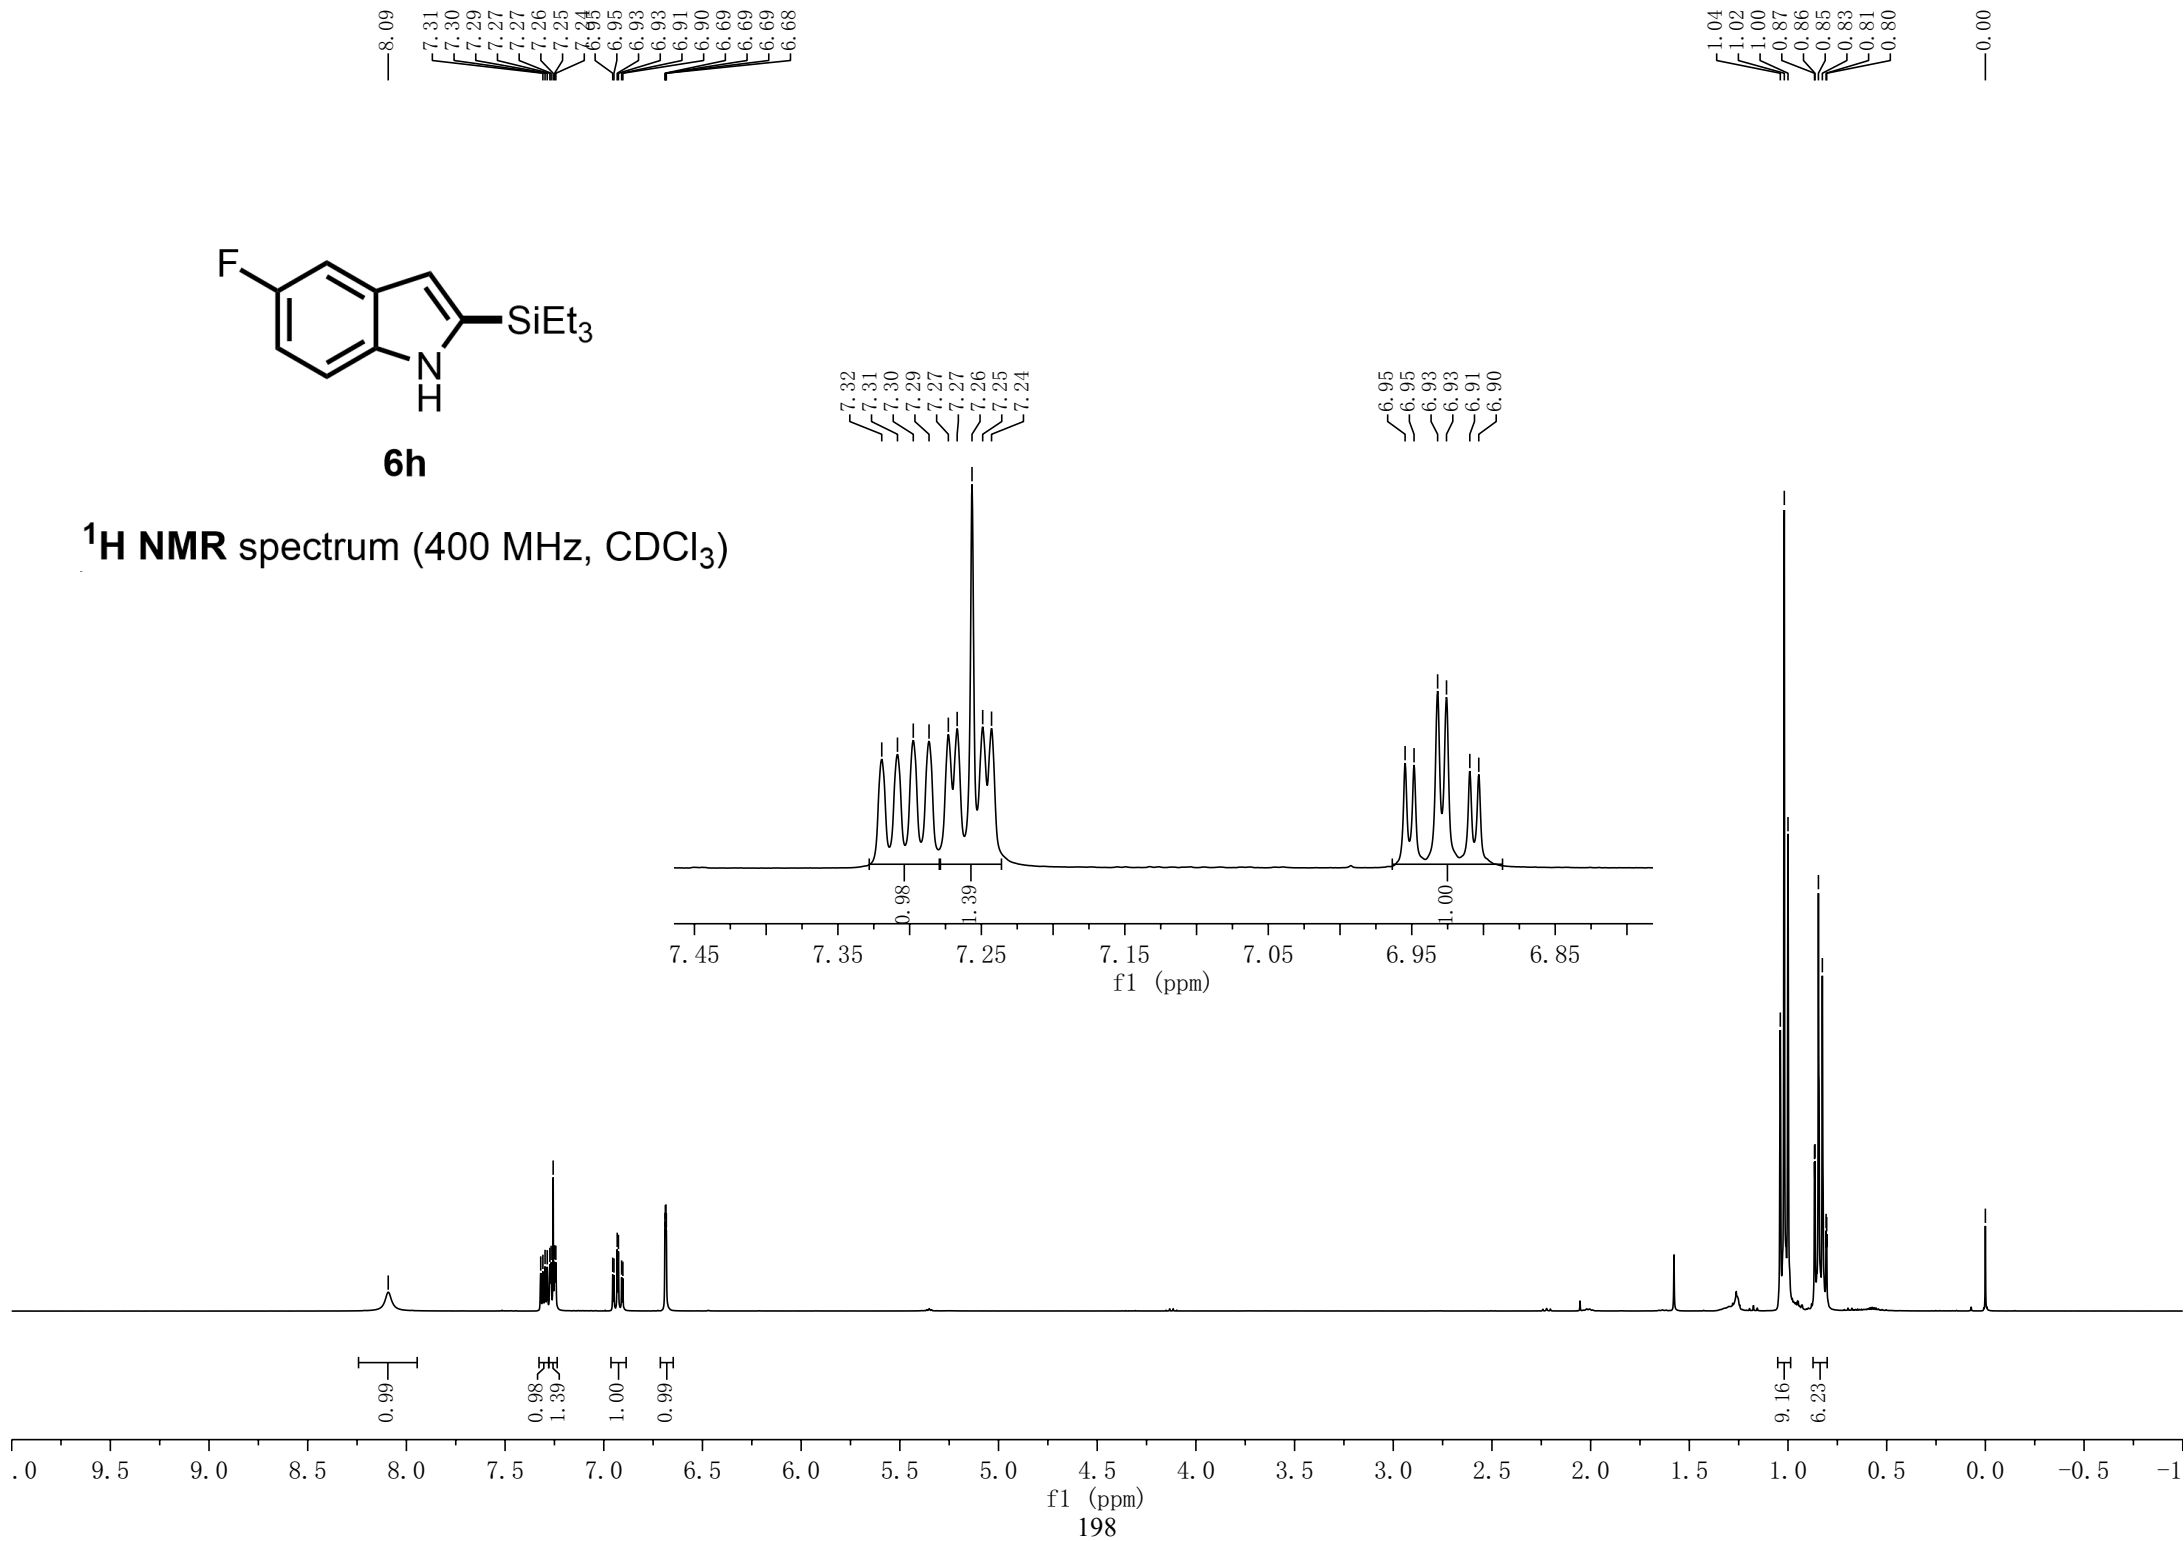

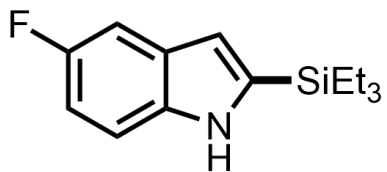

6h

<sup>13</sup>C NMR spectrum (100 MHz, CDCl<sub>3</sub>)

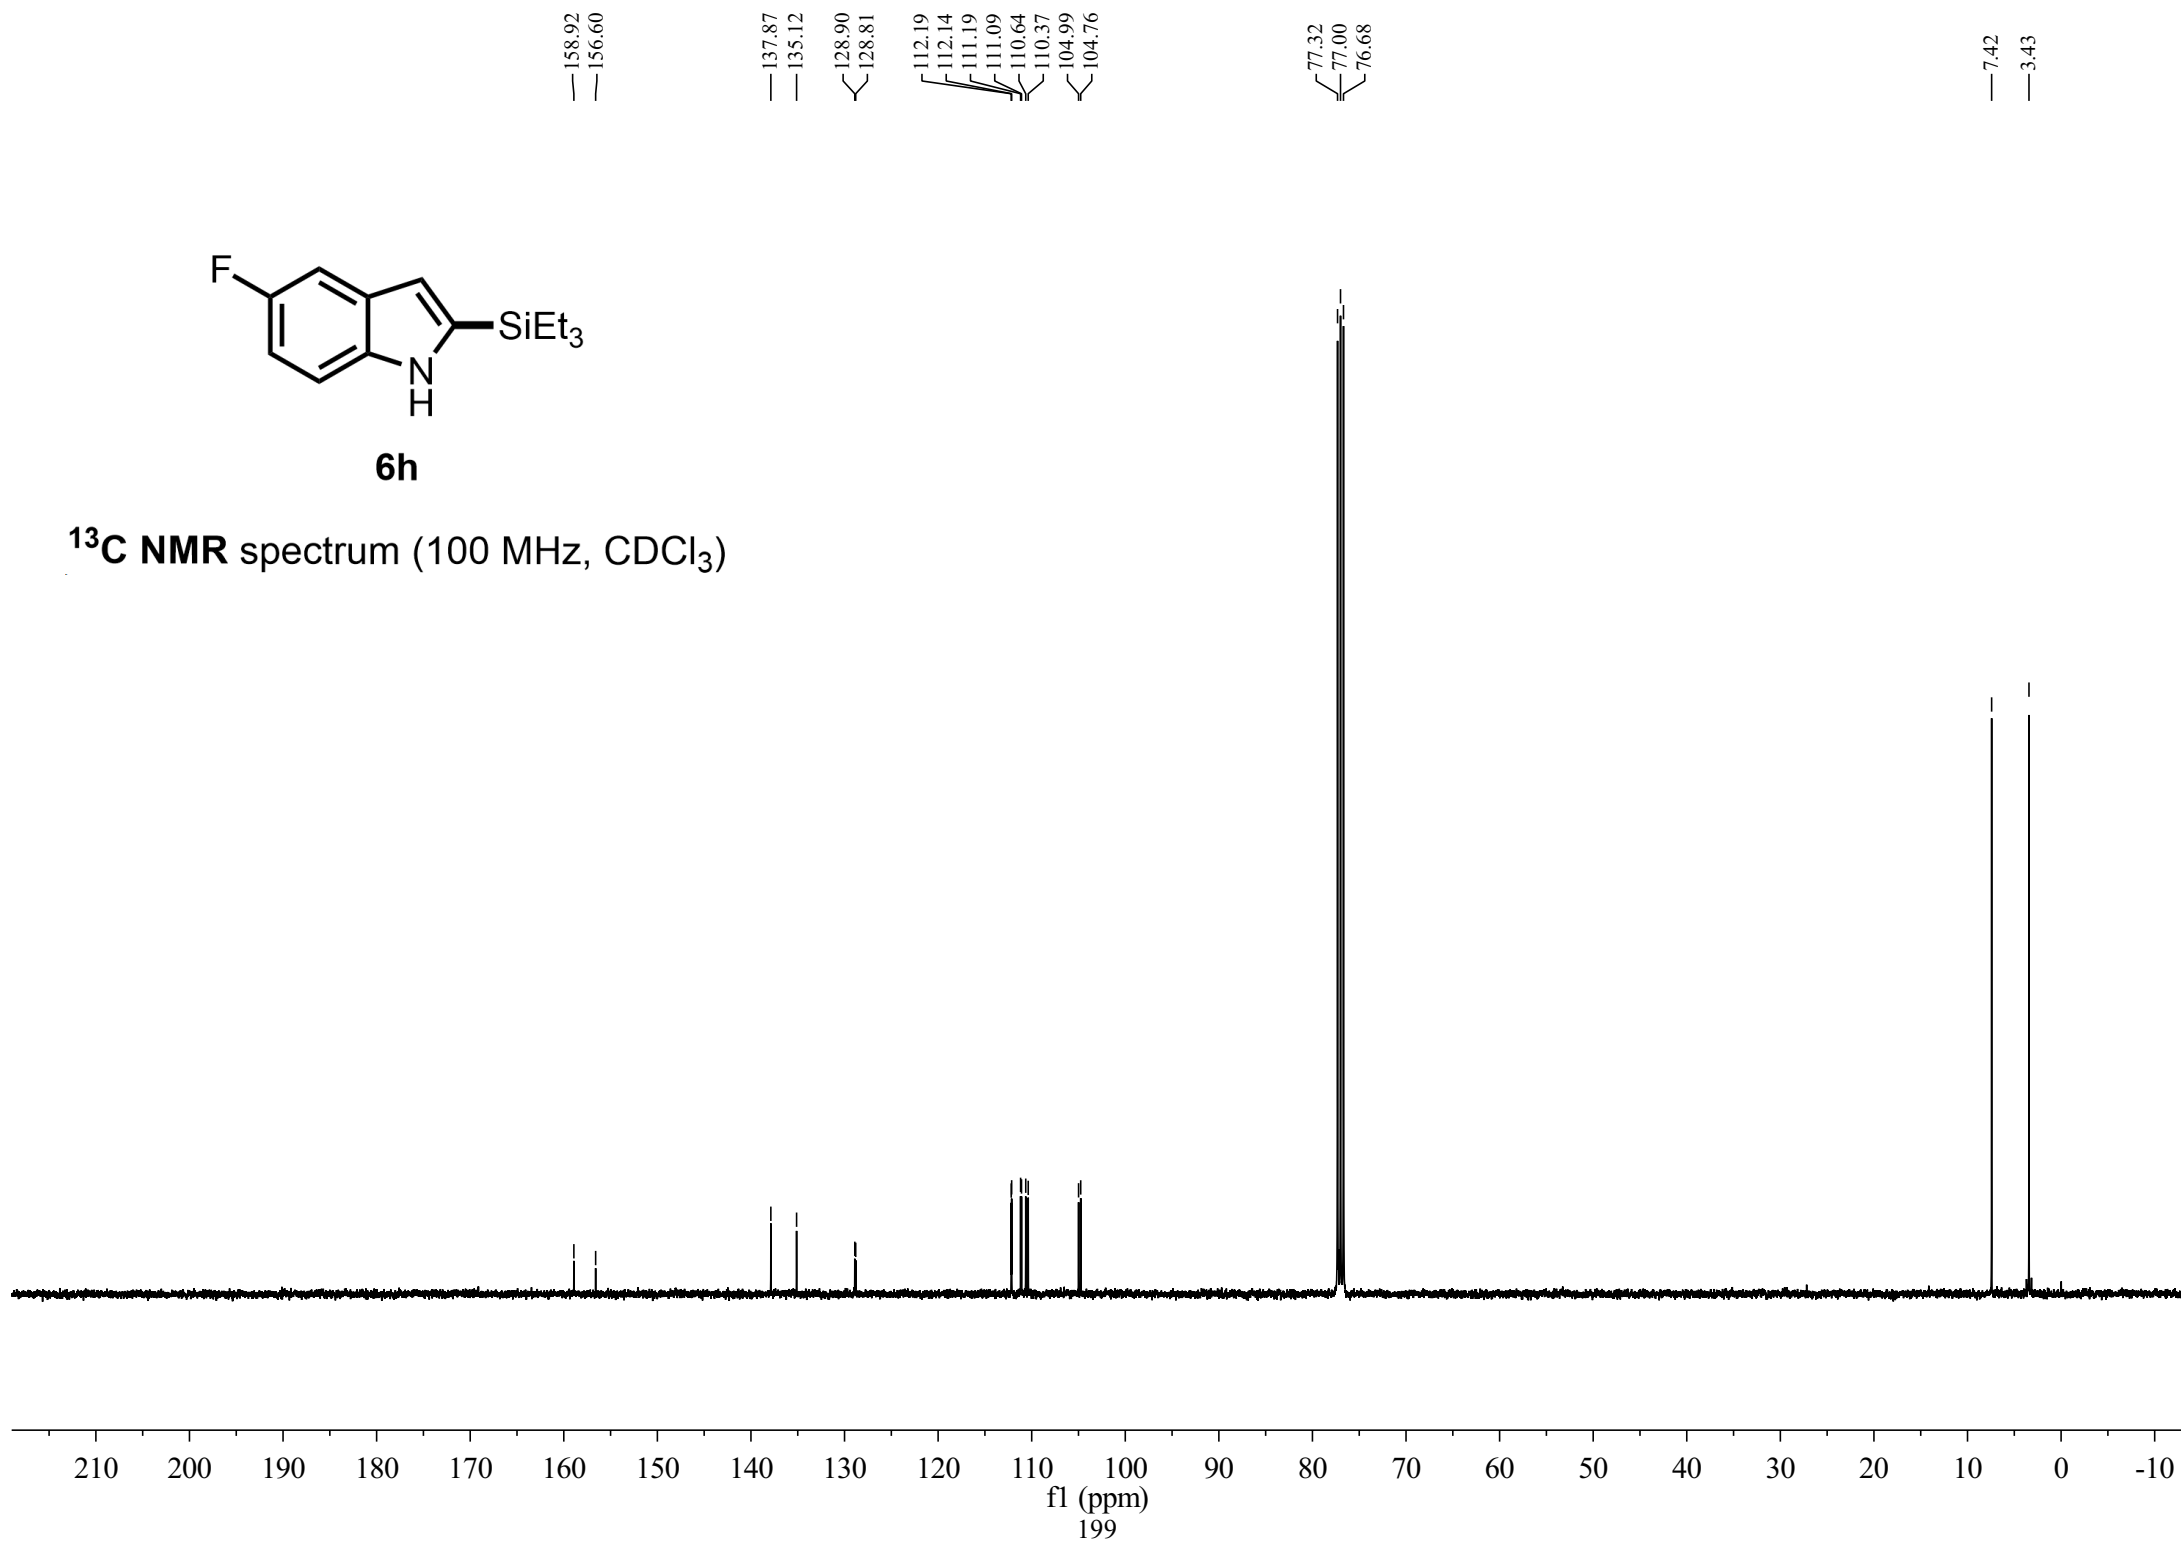

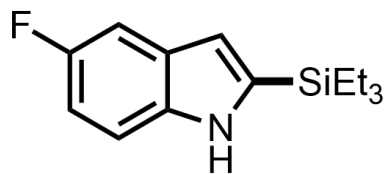

6h

$^{19}\text{F}$  NMR spectrum (376 MHz,  $\text{CDCl}_3$ )

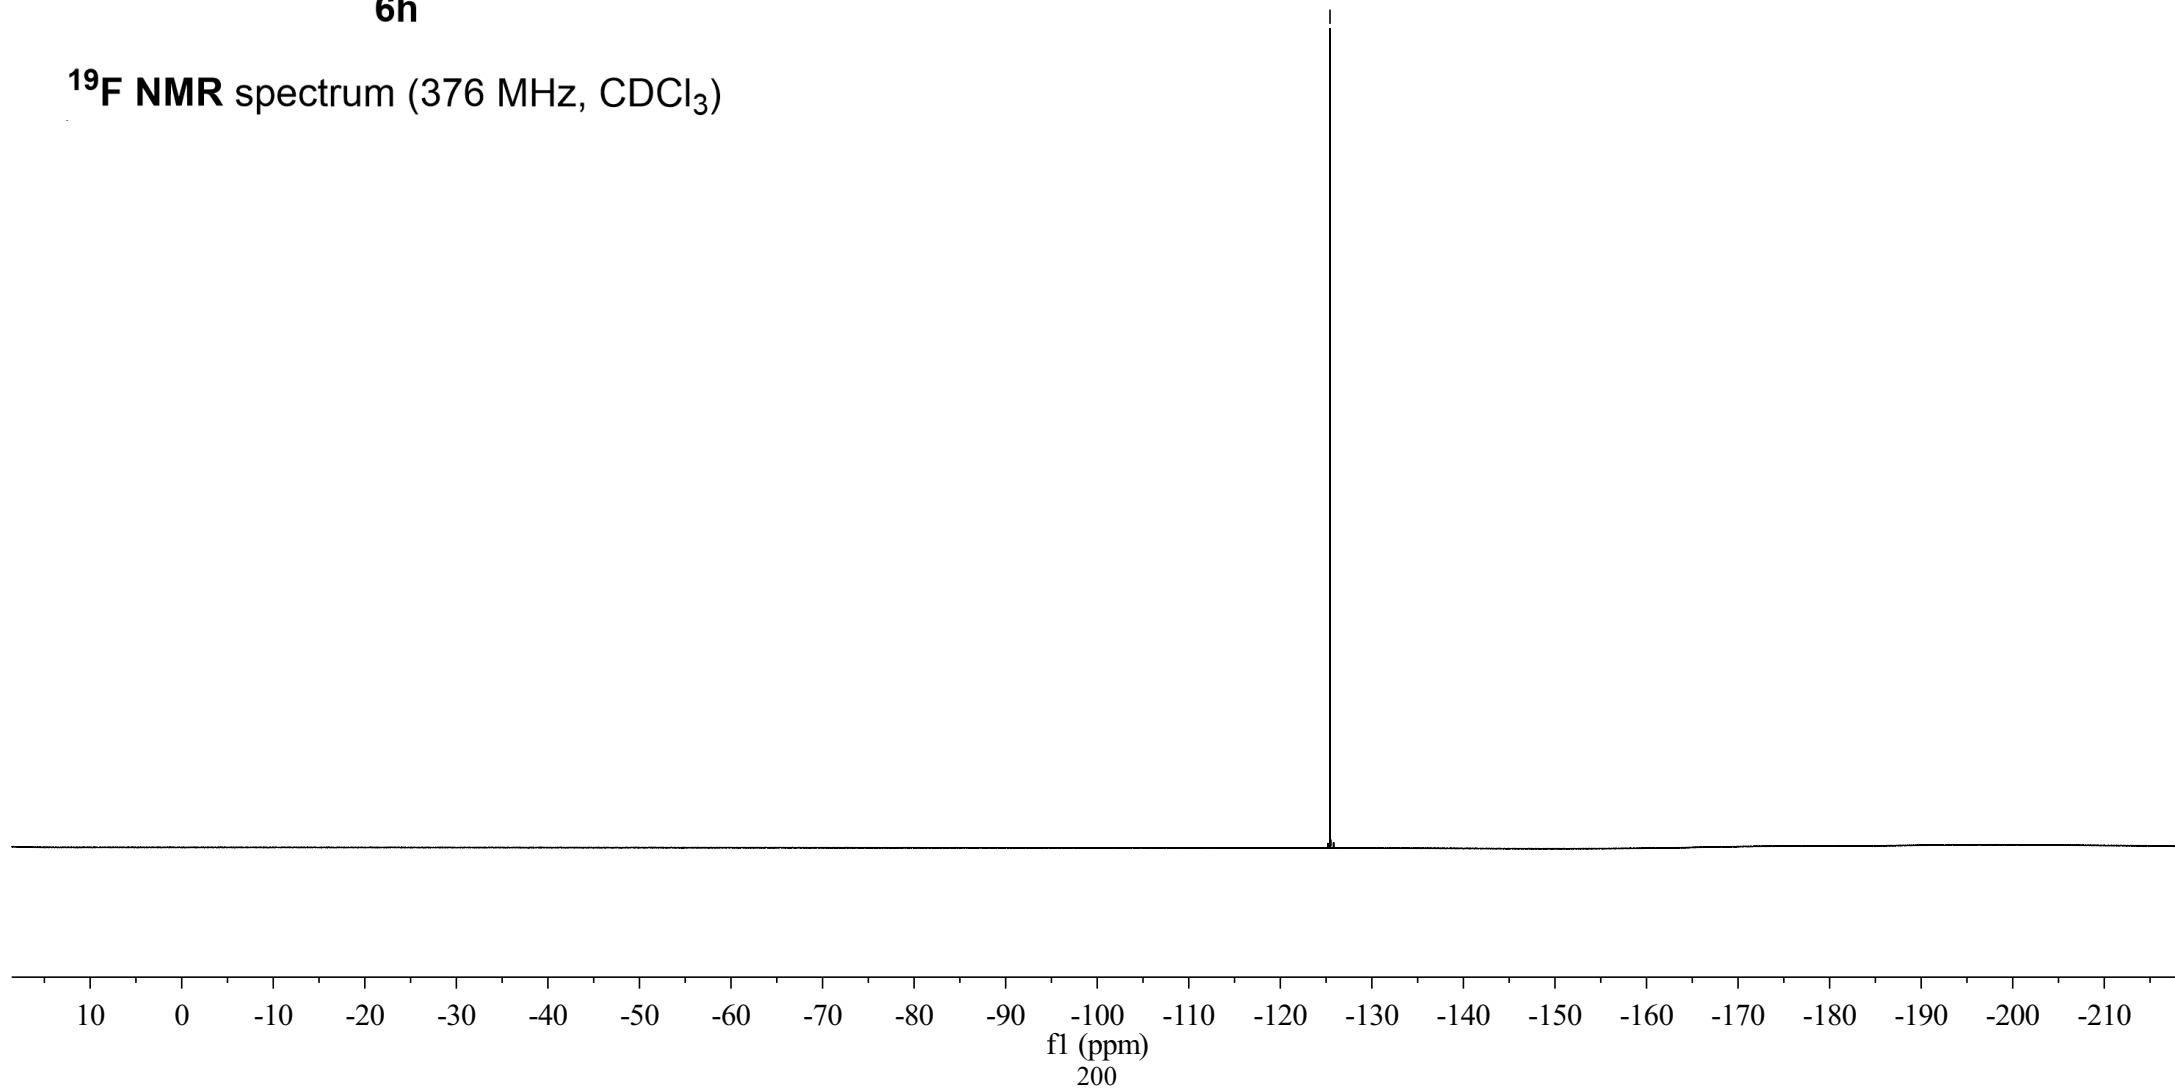



8.22  
7.40  
7.39  
7.38  
7.38  
7.01  
7.00  
6.99  
6.98  
6.97  
6.96  
6.90  
6.90  
6.88  
6.88  
6.87  
6.87  
6.85  
6.85  
6.76  
6.76  
6.75  
6.75

1.04  
1.02  
1.00  
0.88  
0.88  
0.86  
0.86  
0.84  
0.82  
0.82

-0.00

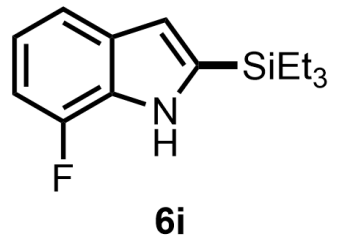

**<sup>1</sup>H NMR spectrum (400 MHz, CDCl<sub>3</sub>)**

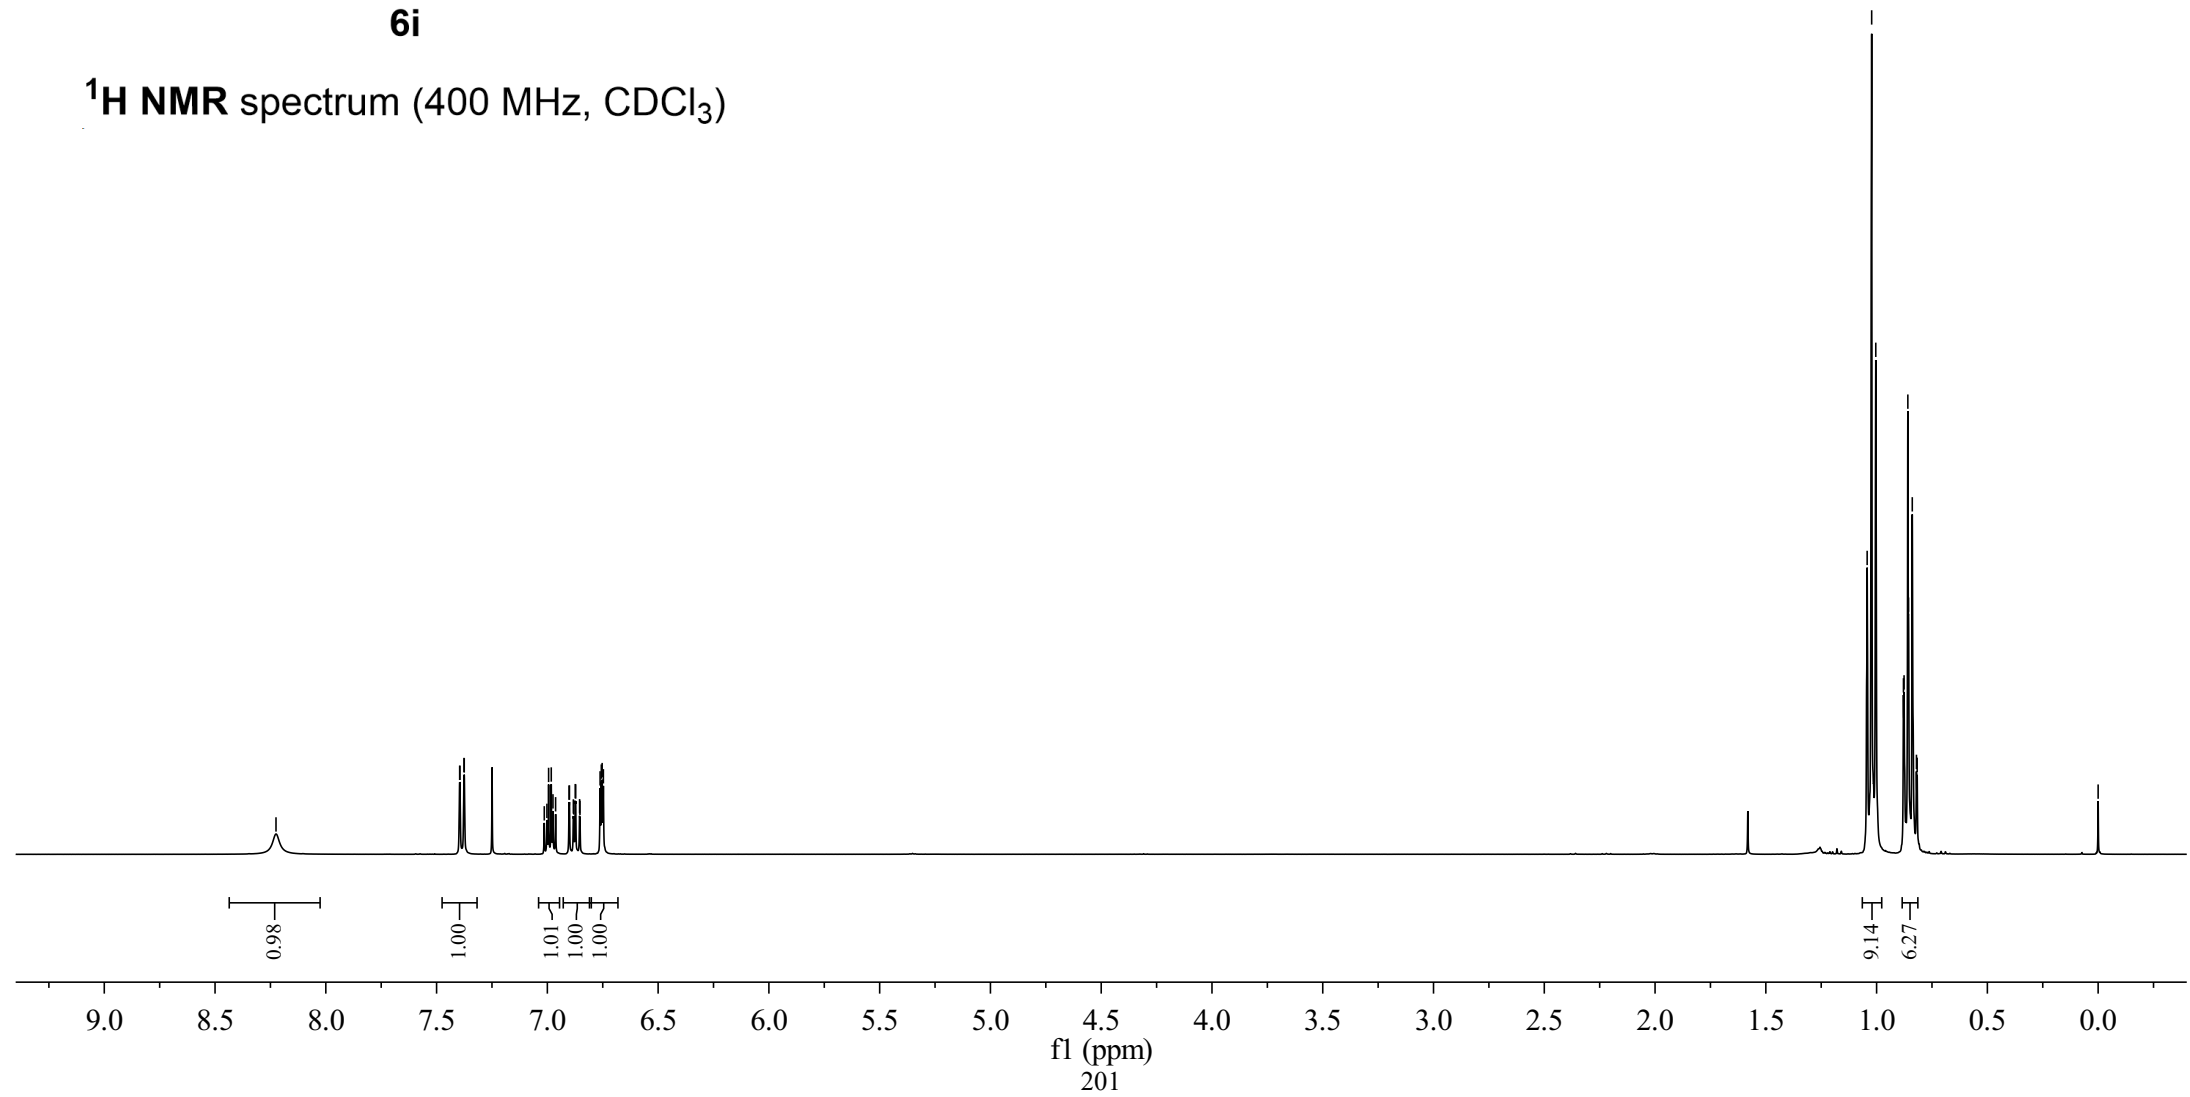

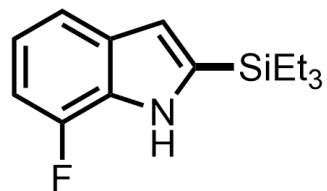

**6i**

— 150.55  
— 148.14  
— 136.71  
— 132.43  
— 132.37  
— 127.05  
— 126.92  
— 119.73  
— 119.67  
— 116.10  
— 116.06  
— 112.77  
— 112.74  
— 106.73  
— 106.57

— 7.40  
— 3.43

**<sup>13</sup>C NMR spectrum (100 MHz, CDCl<sub>3</sub>)**

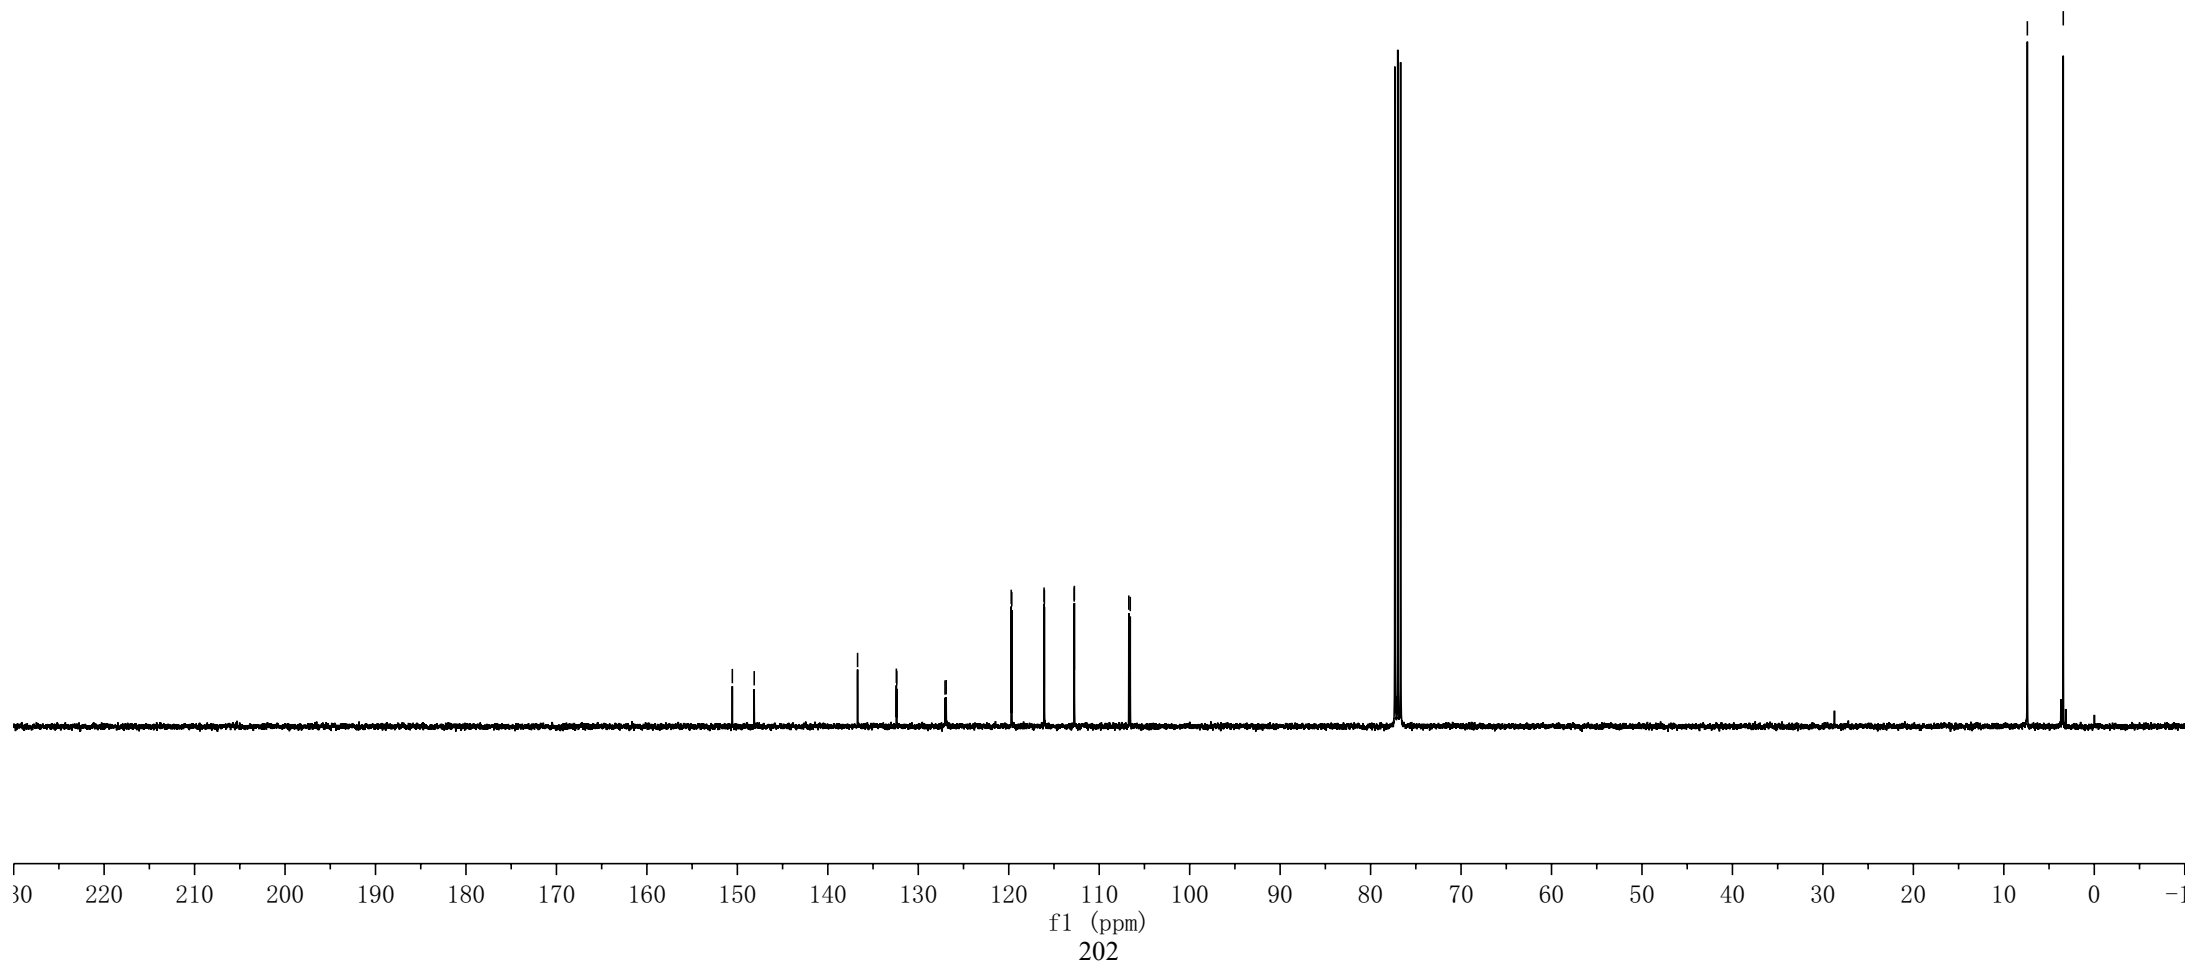

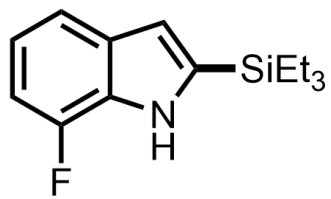

**6i**

**<sup>19</sup>F NMR spectrum (376 MHz, CDCl<sub>3</sub>)**

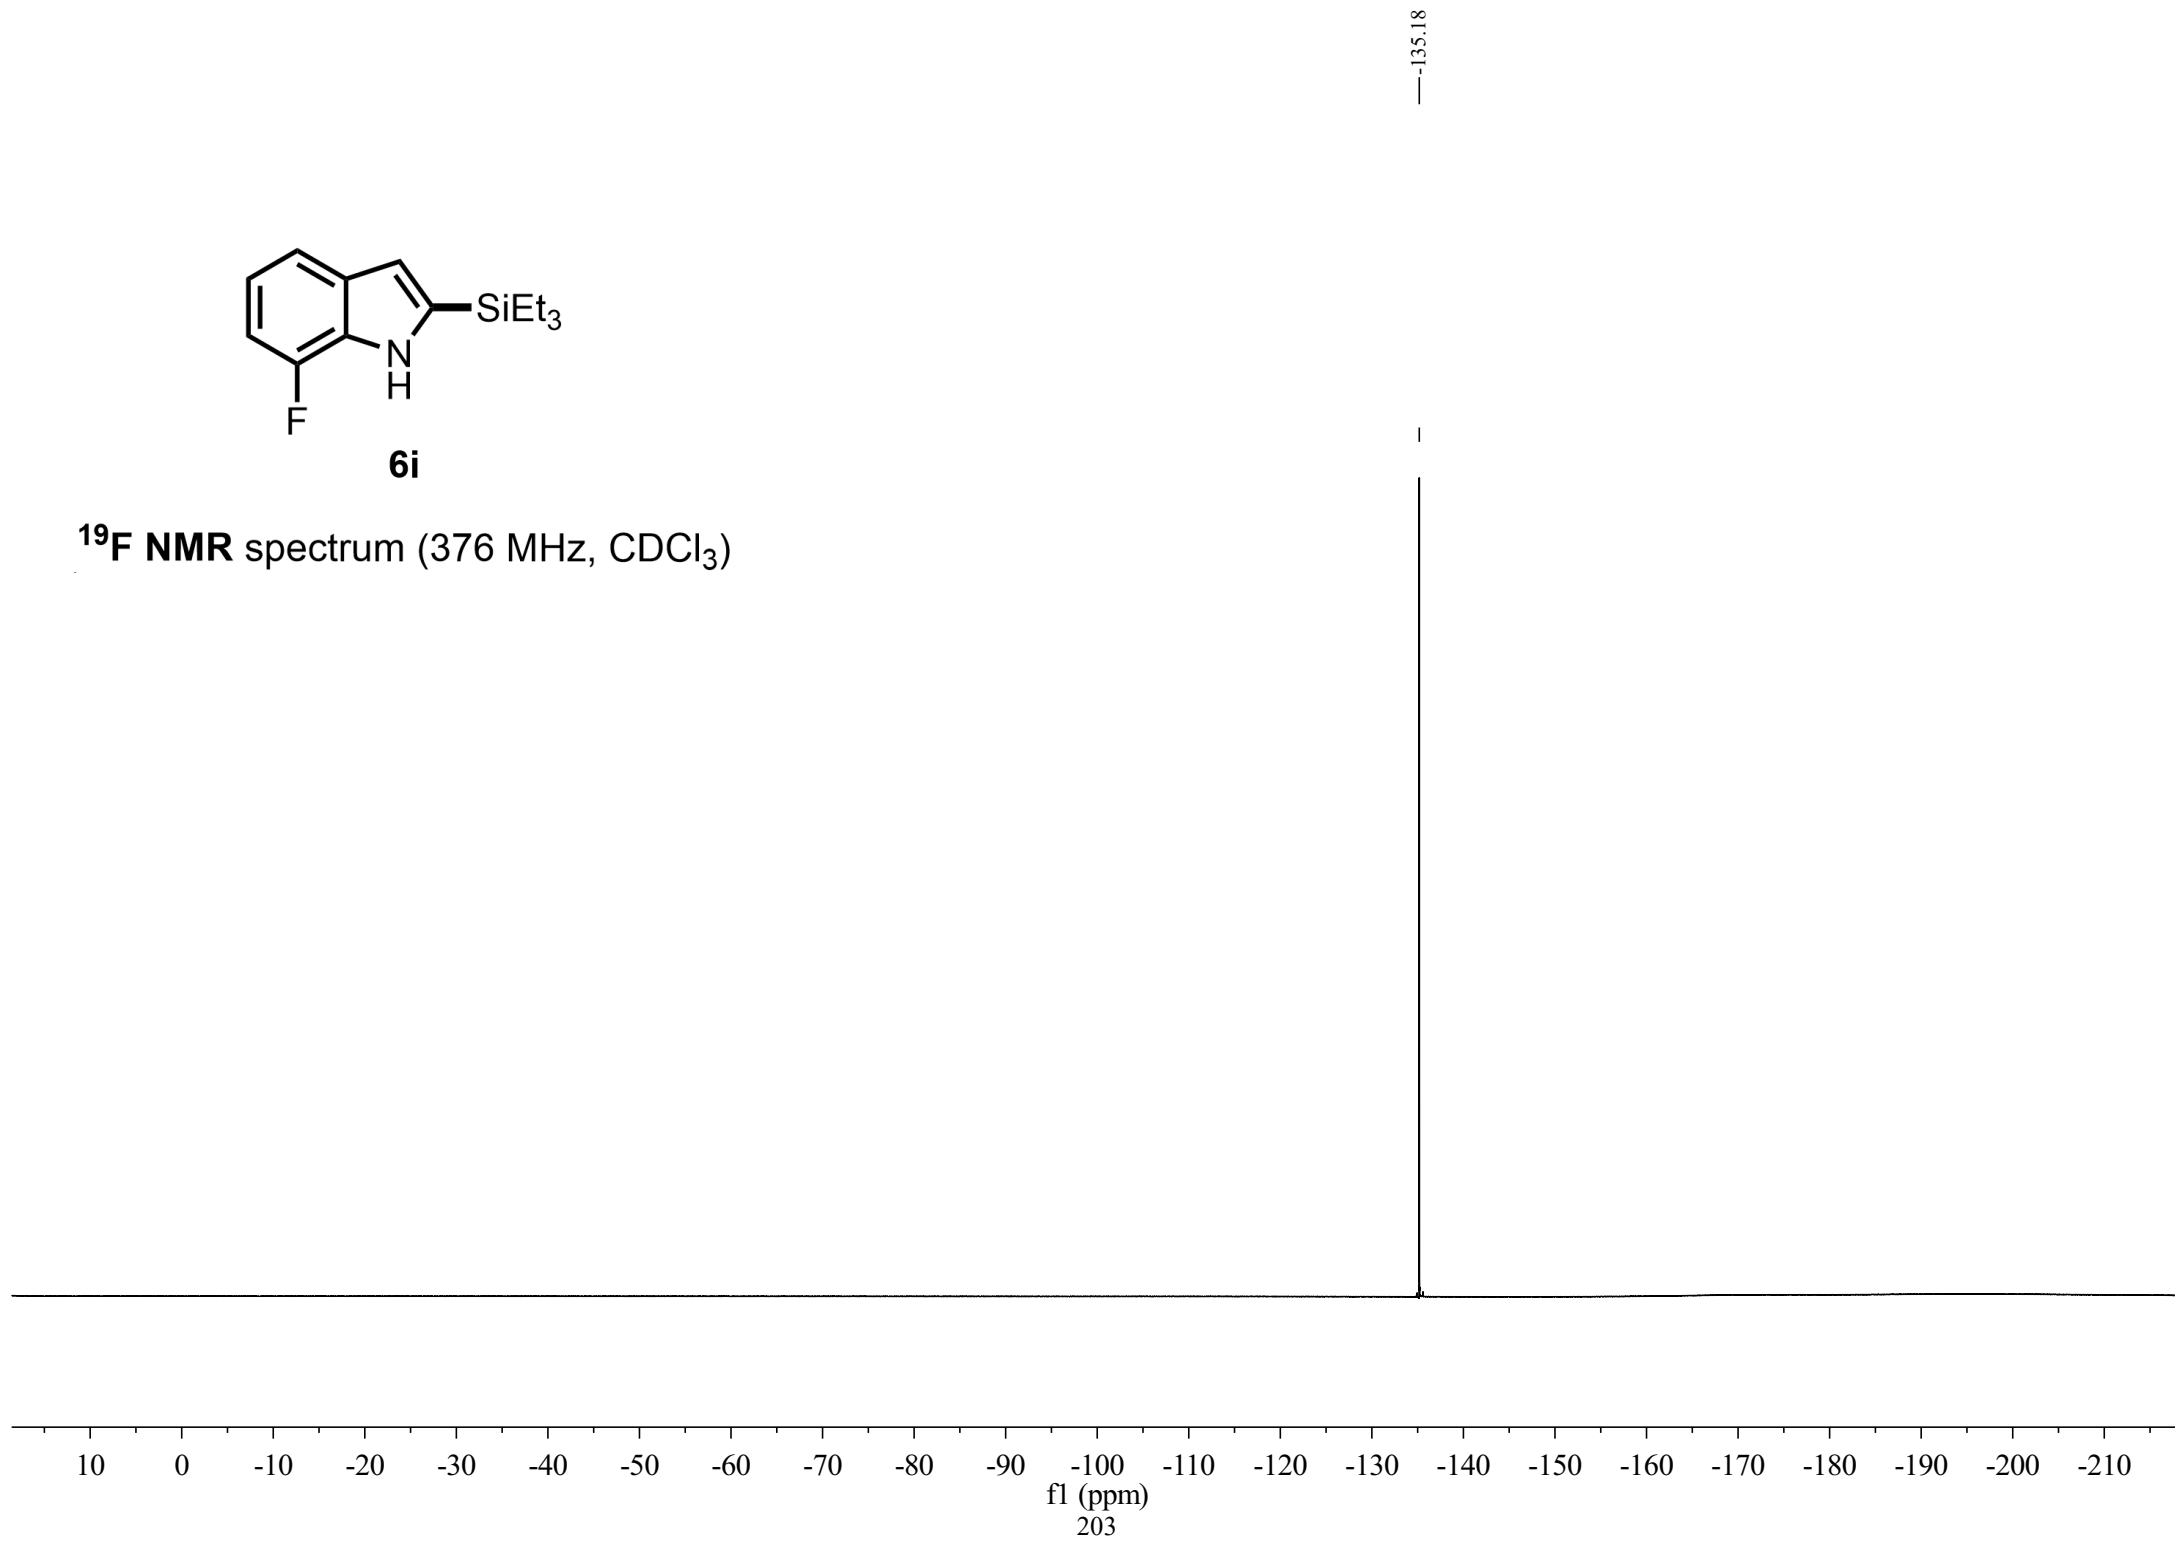

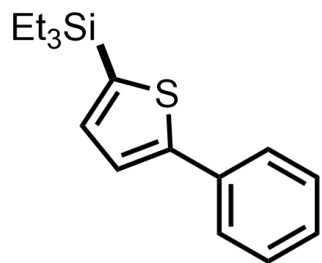

6j

$^1\text{H}$  NMR spectrum (400 MHz,  $\text{CDCl}_3$ )

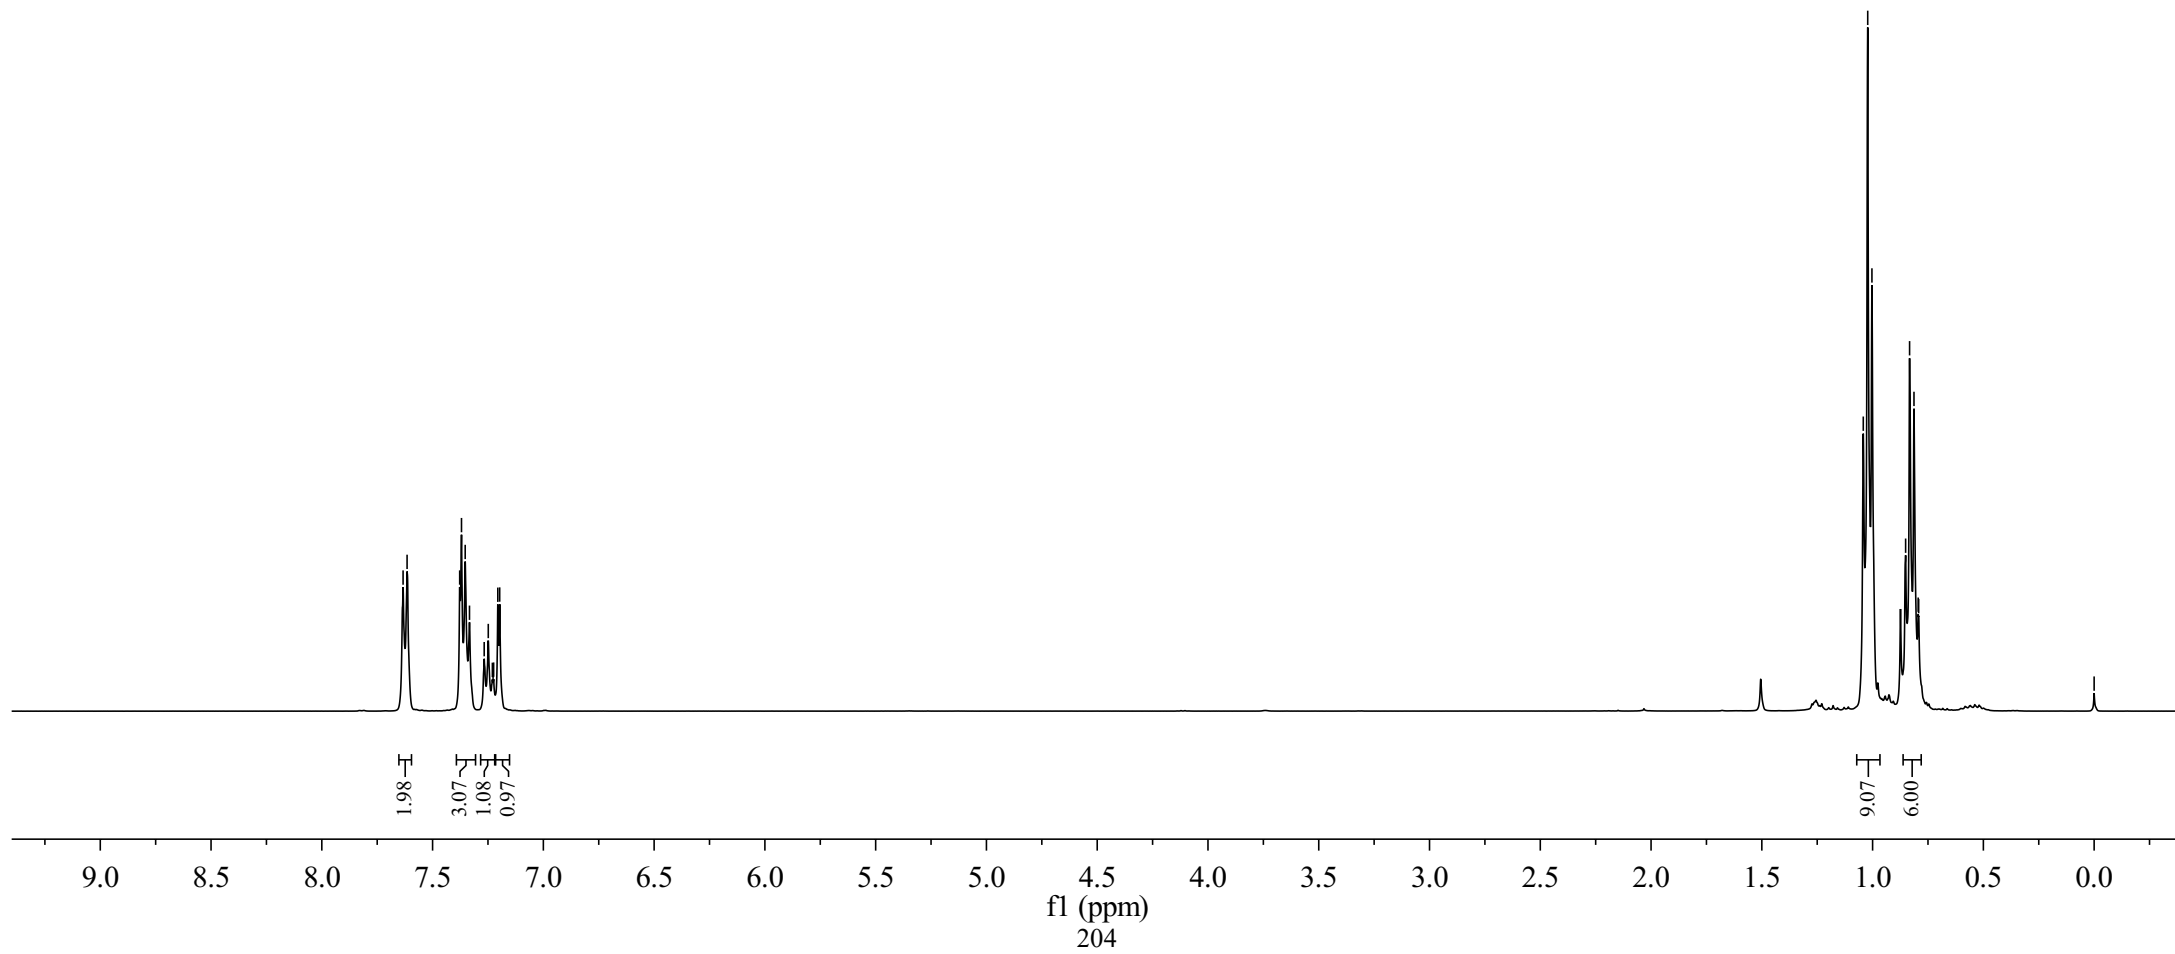

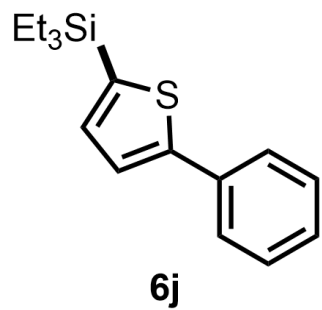

— 149.59

136.54  
135.68  
134.42  
128.80  
127.35  
125.96  
124.27

77.32  
77.00  
76.68

— 7.36  
— 4.39

<sup>13</sup>C NMR spectrum (100 MHz, CDCl<sub>3</sub>)

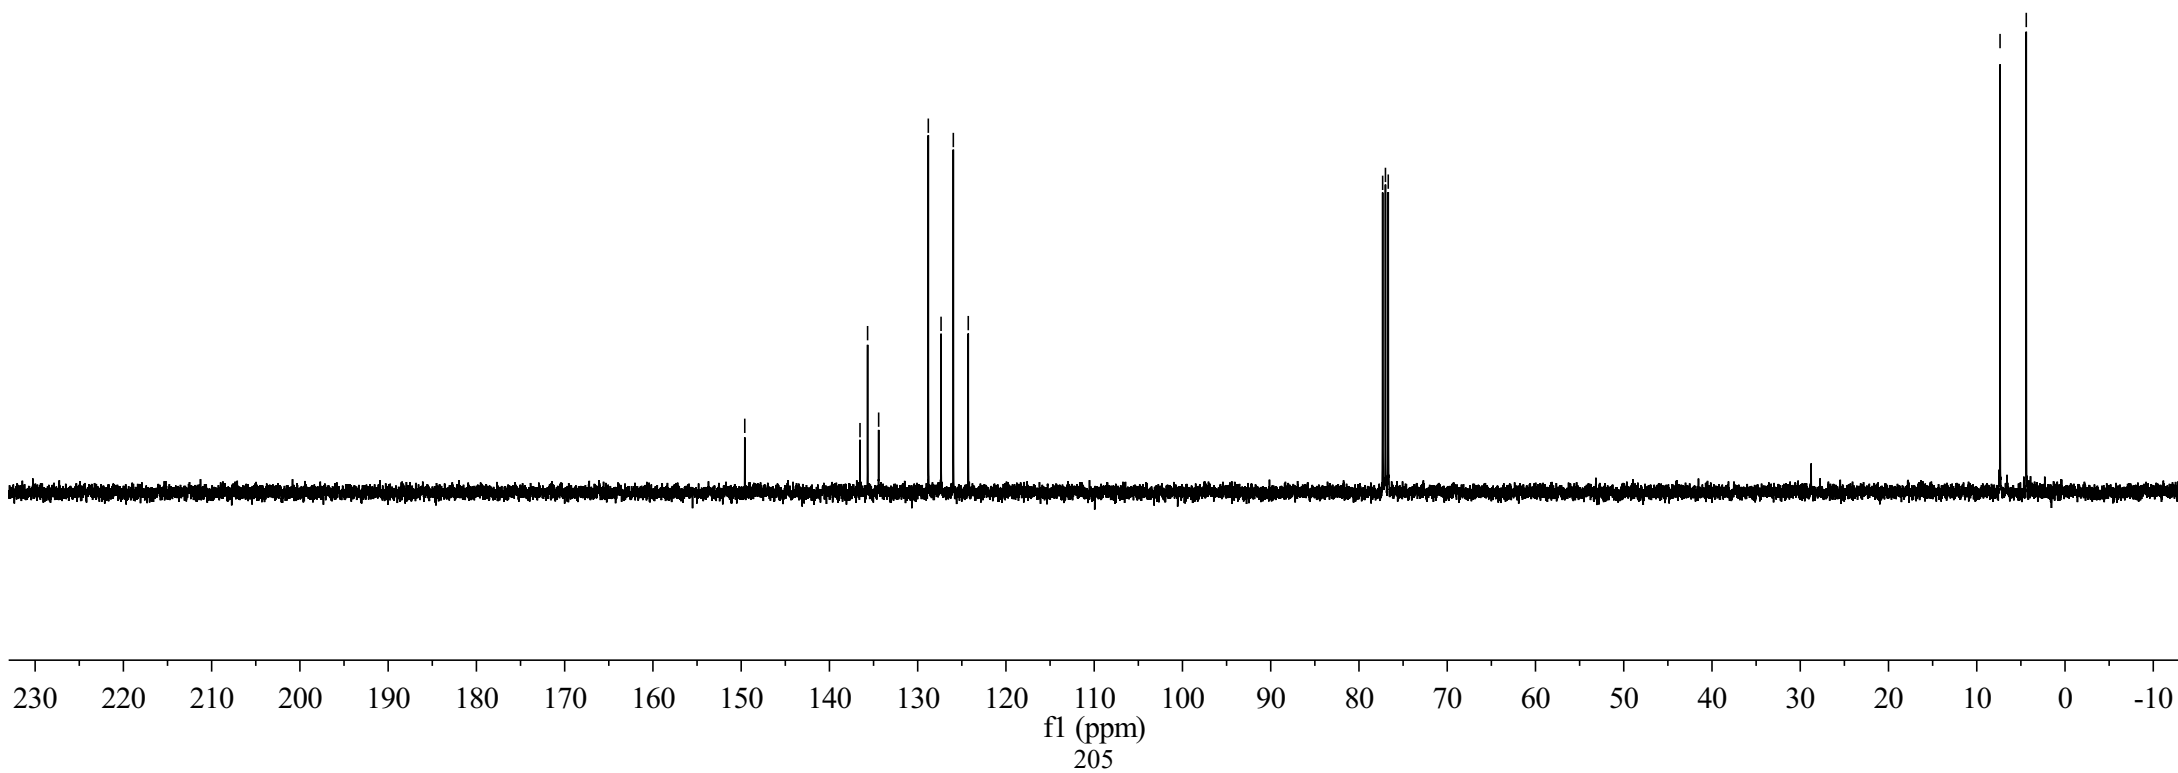

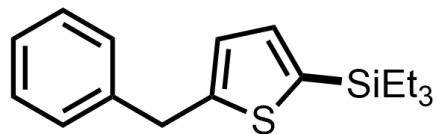

**6k**

<sup>1</sup>H NMR spectrum (400 MHz, CDCl<sub>3</sub>)

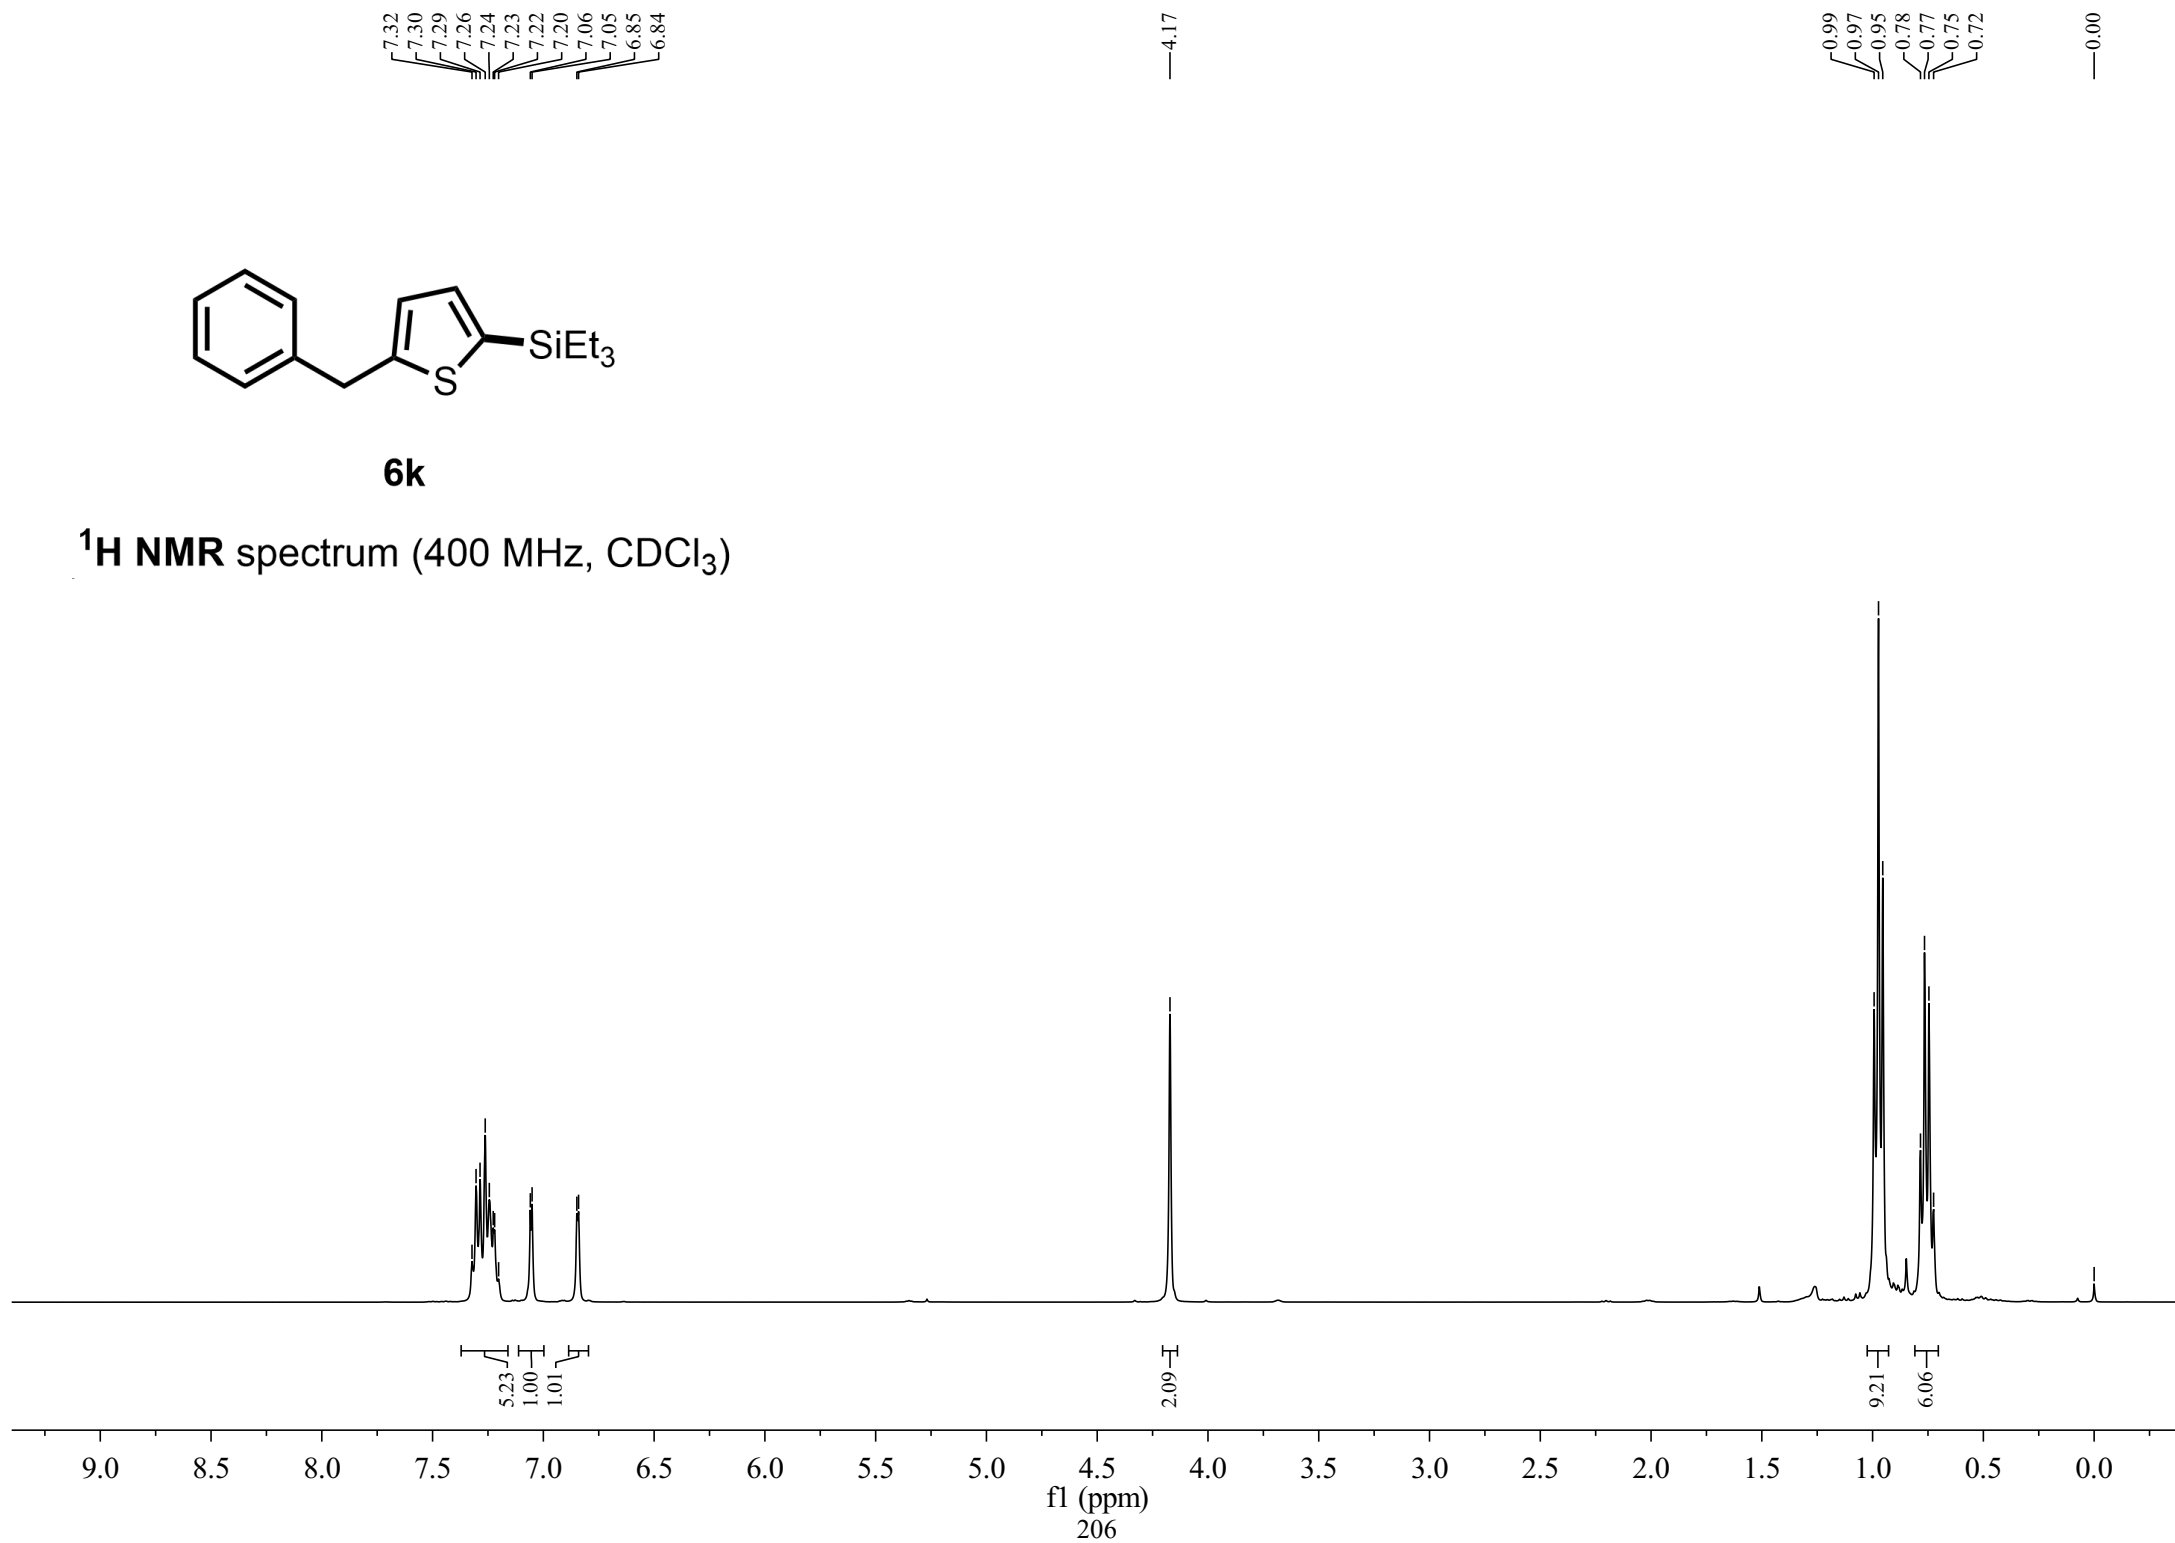

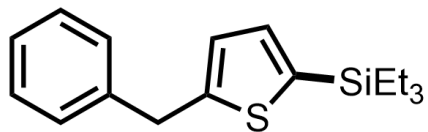

**6k**

<sup>13</sup>C NMR spectrum (100 MHz, CDCl<sub>3</sub>)

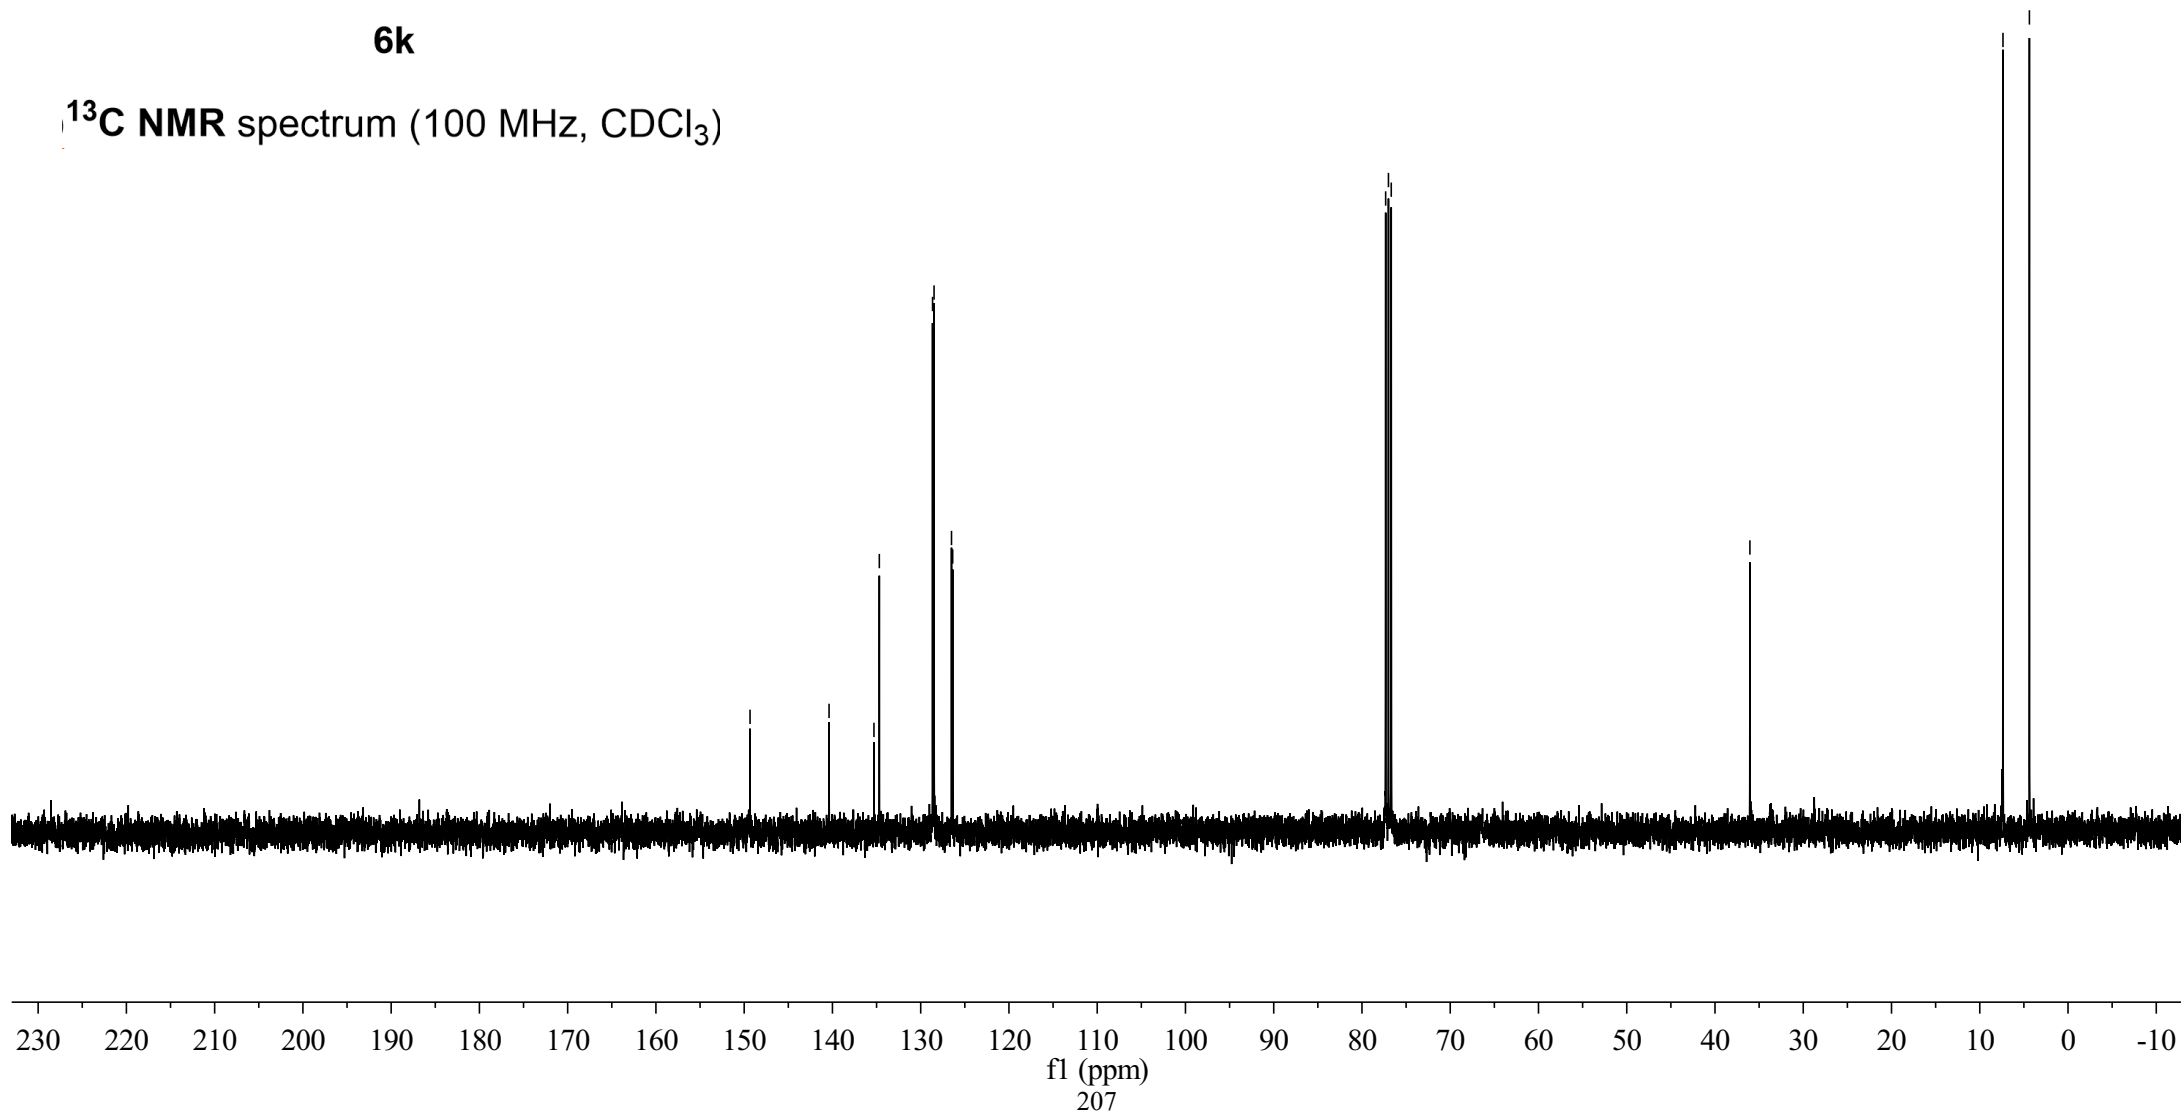

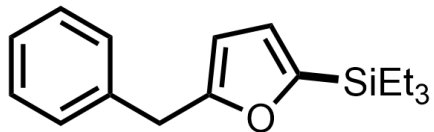

**6l**

<sup>1</sup>H NMR spectrum (400 MHz, CDCl<sub>3</sub>)

7.31  
7.29  
7.27  
7.25  
7.24  
7.22  
7.19

6.54  
6.53

5.94  
5.93

4.00

0.99  
0.97  
0.95  
0.76  
0.74  
0.72  
0.70

-0.00

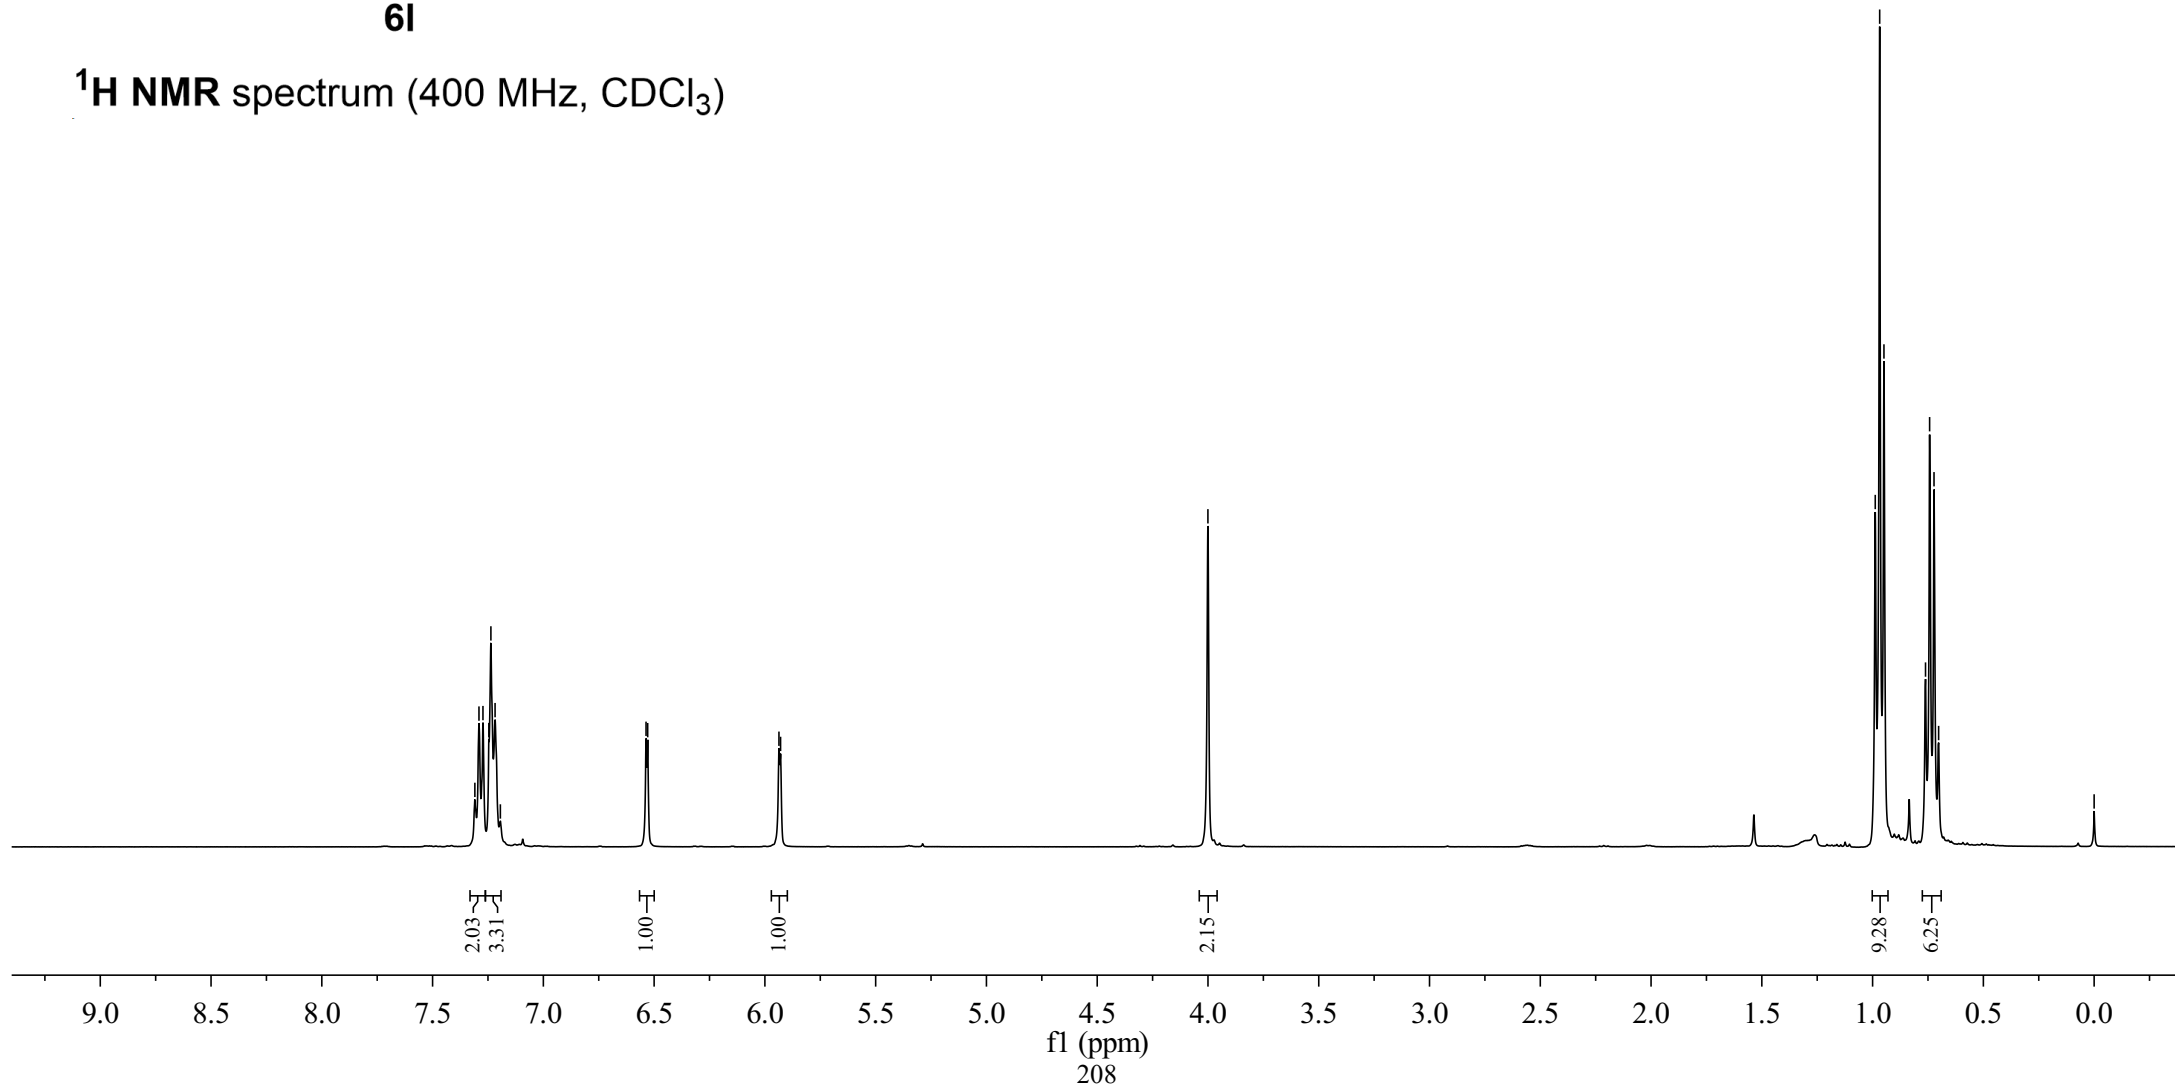



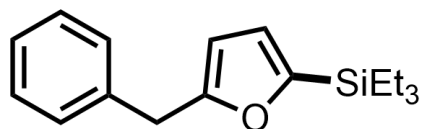

**6l**

**<sup>13</sup>C NMR spectrum (100 MHz, CDCl<sub>3</sub>)**

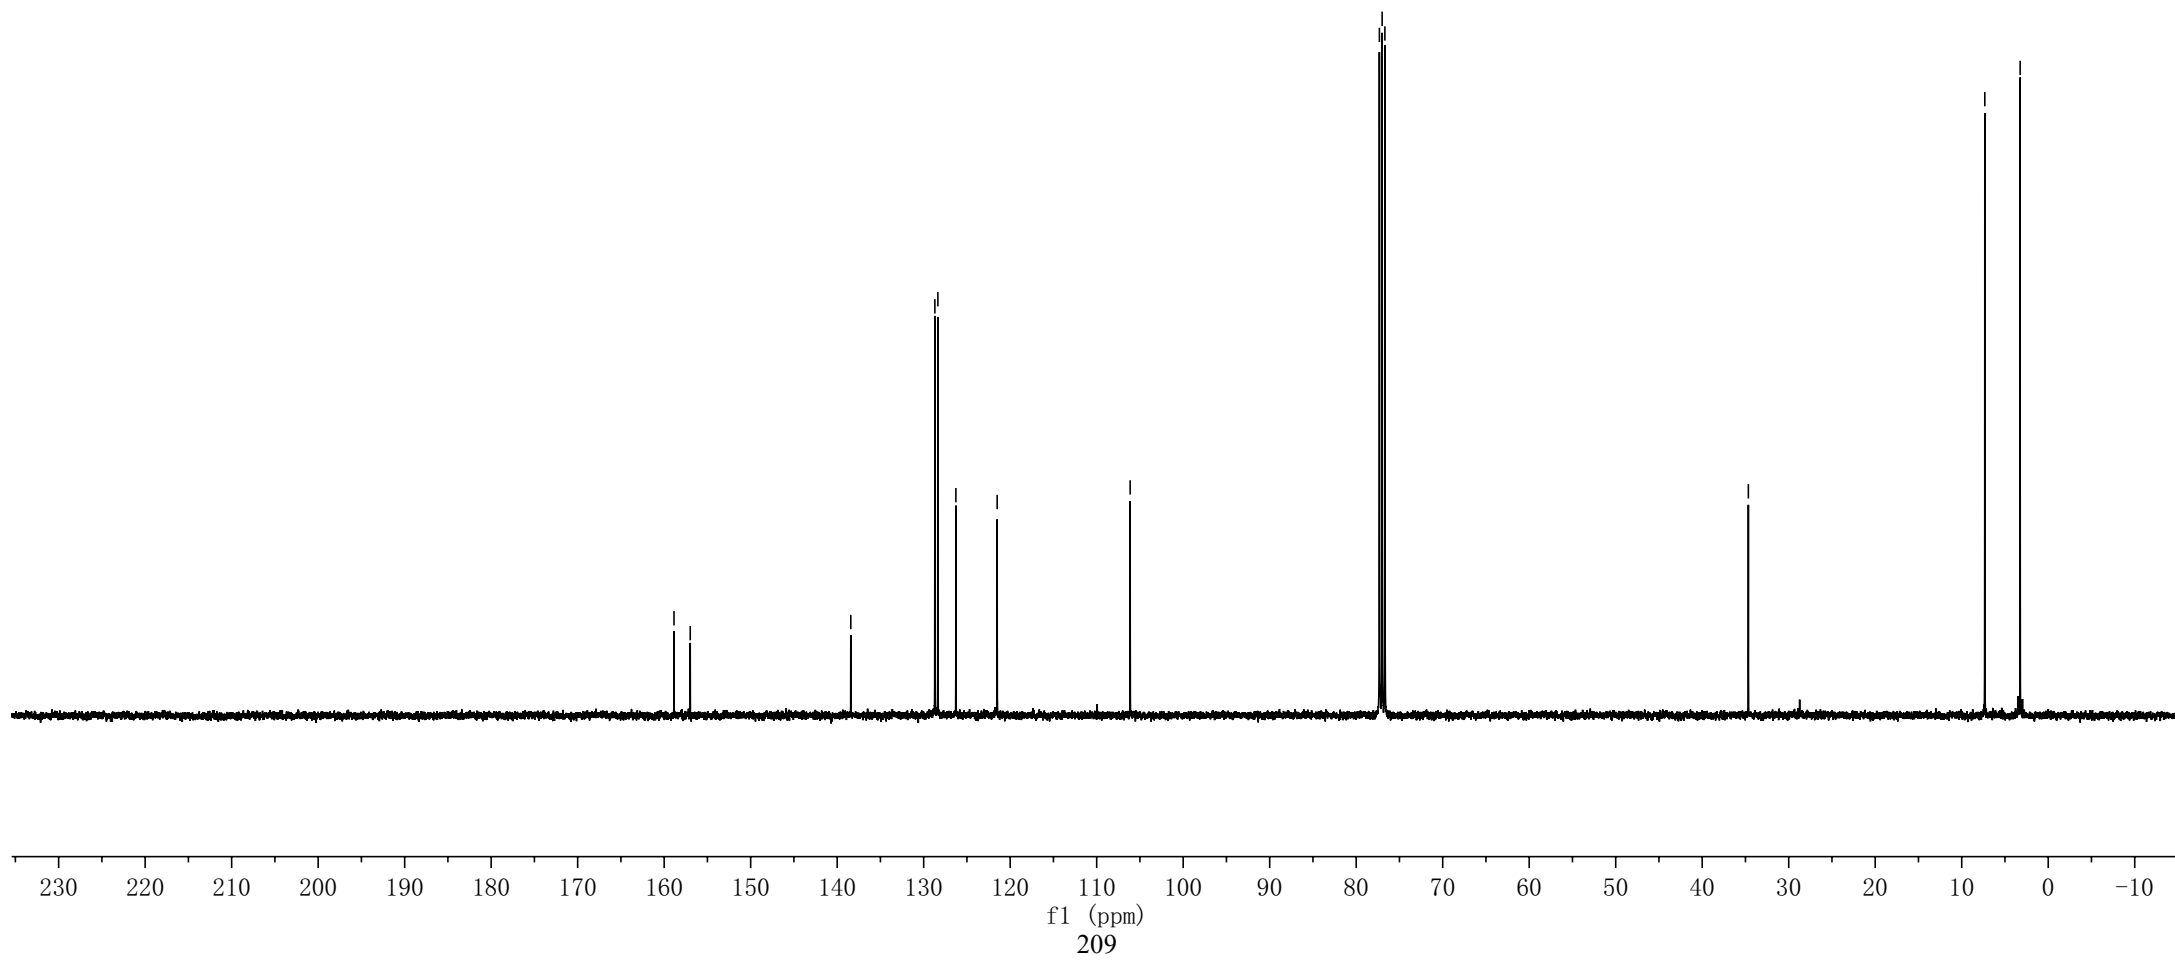

7.95  
7.93  
7.80  
7.78  
7.72  
7.72  
7.70  
7.70  
7.43  
7.41  
7.39  
7.20  
7.18

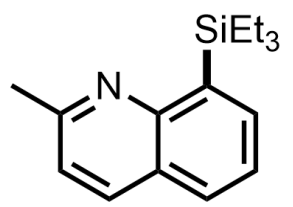

**6m**

**<sup>1</sup>H NMR spectrum (400 MHz, CDCl<sub>3</sub>)**

2.67

1.04  
1.04  
1.02  
1.01  
1.01  
0.98  
0.98  
0.96  
0.95  
0.95  
0.94  
0.94

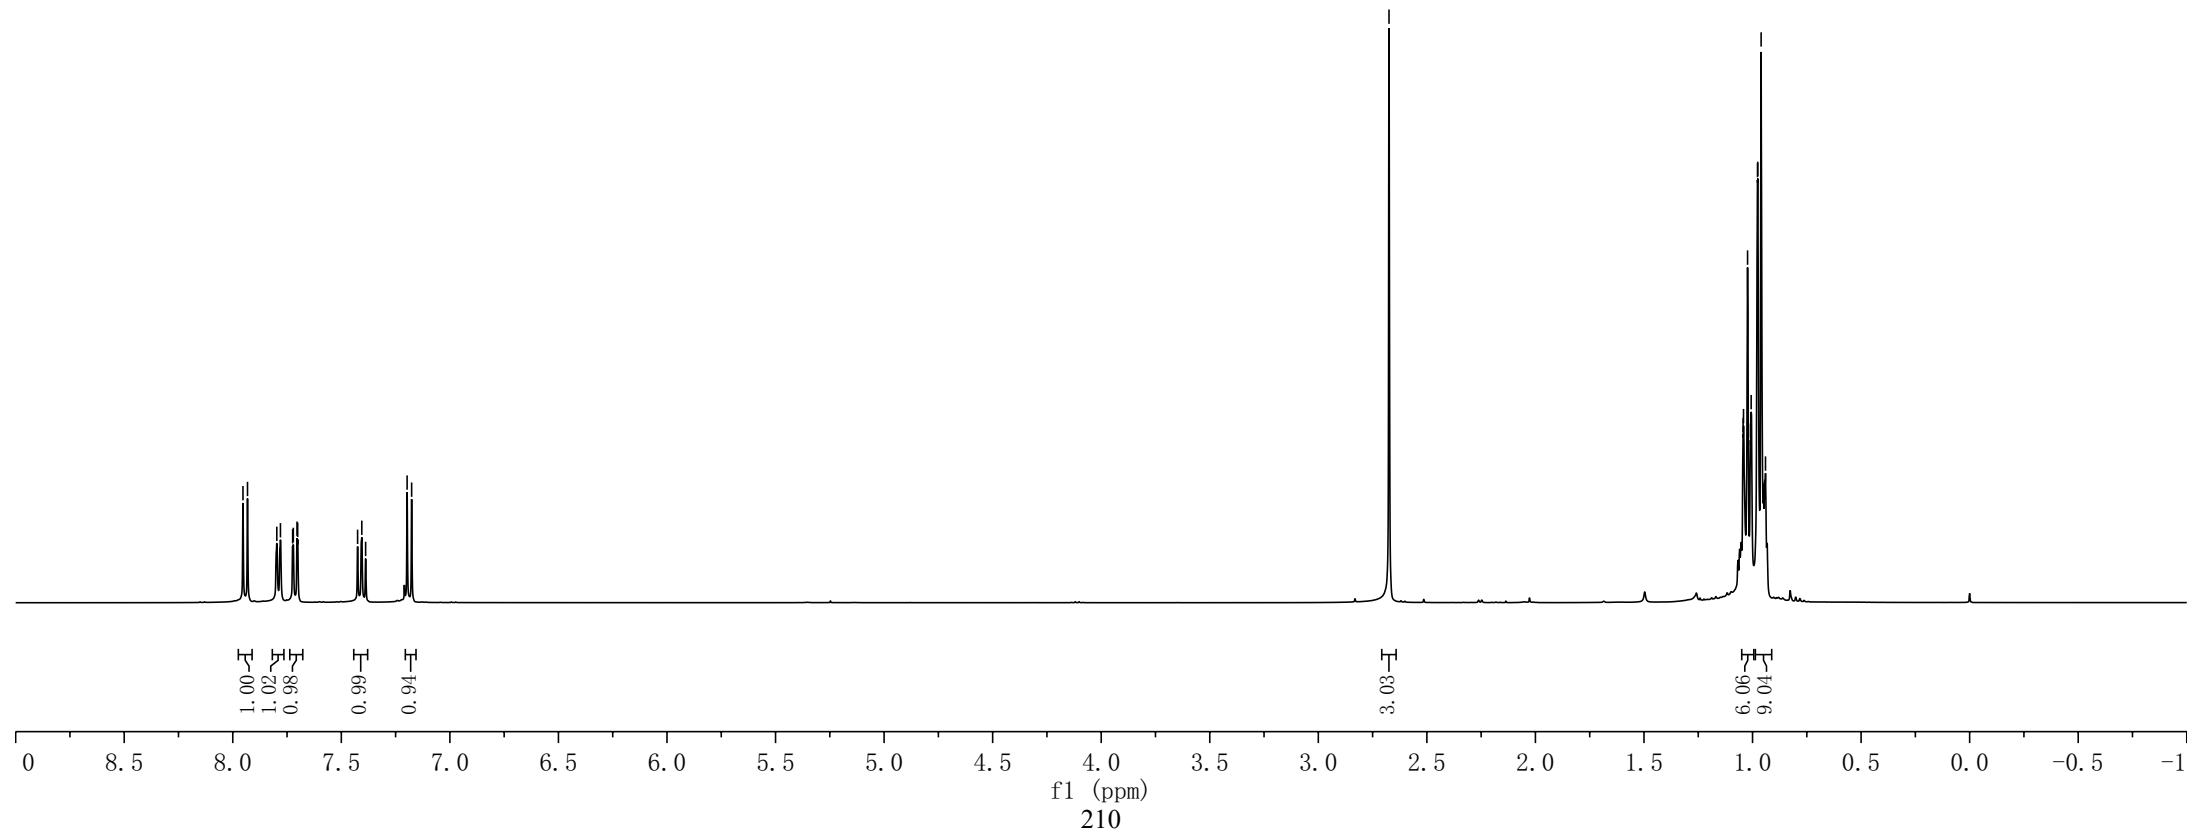

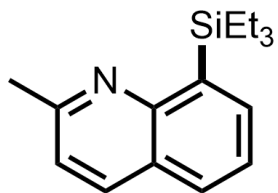

6m

— 157.12  
— 152.49

— 138.46  
— 136.58  
— 135.93

— 128.42  
— 125.57  
— 124.97  
— 121.19

— 77.32  
— 77.00  
— 76.68

— 25.12

— 7.83  
— 4.25

<sup>13</sup>C NMR spectrum (100 MHz, CDCl<sub>3</sub>)

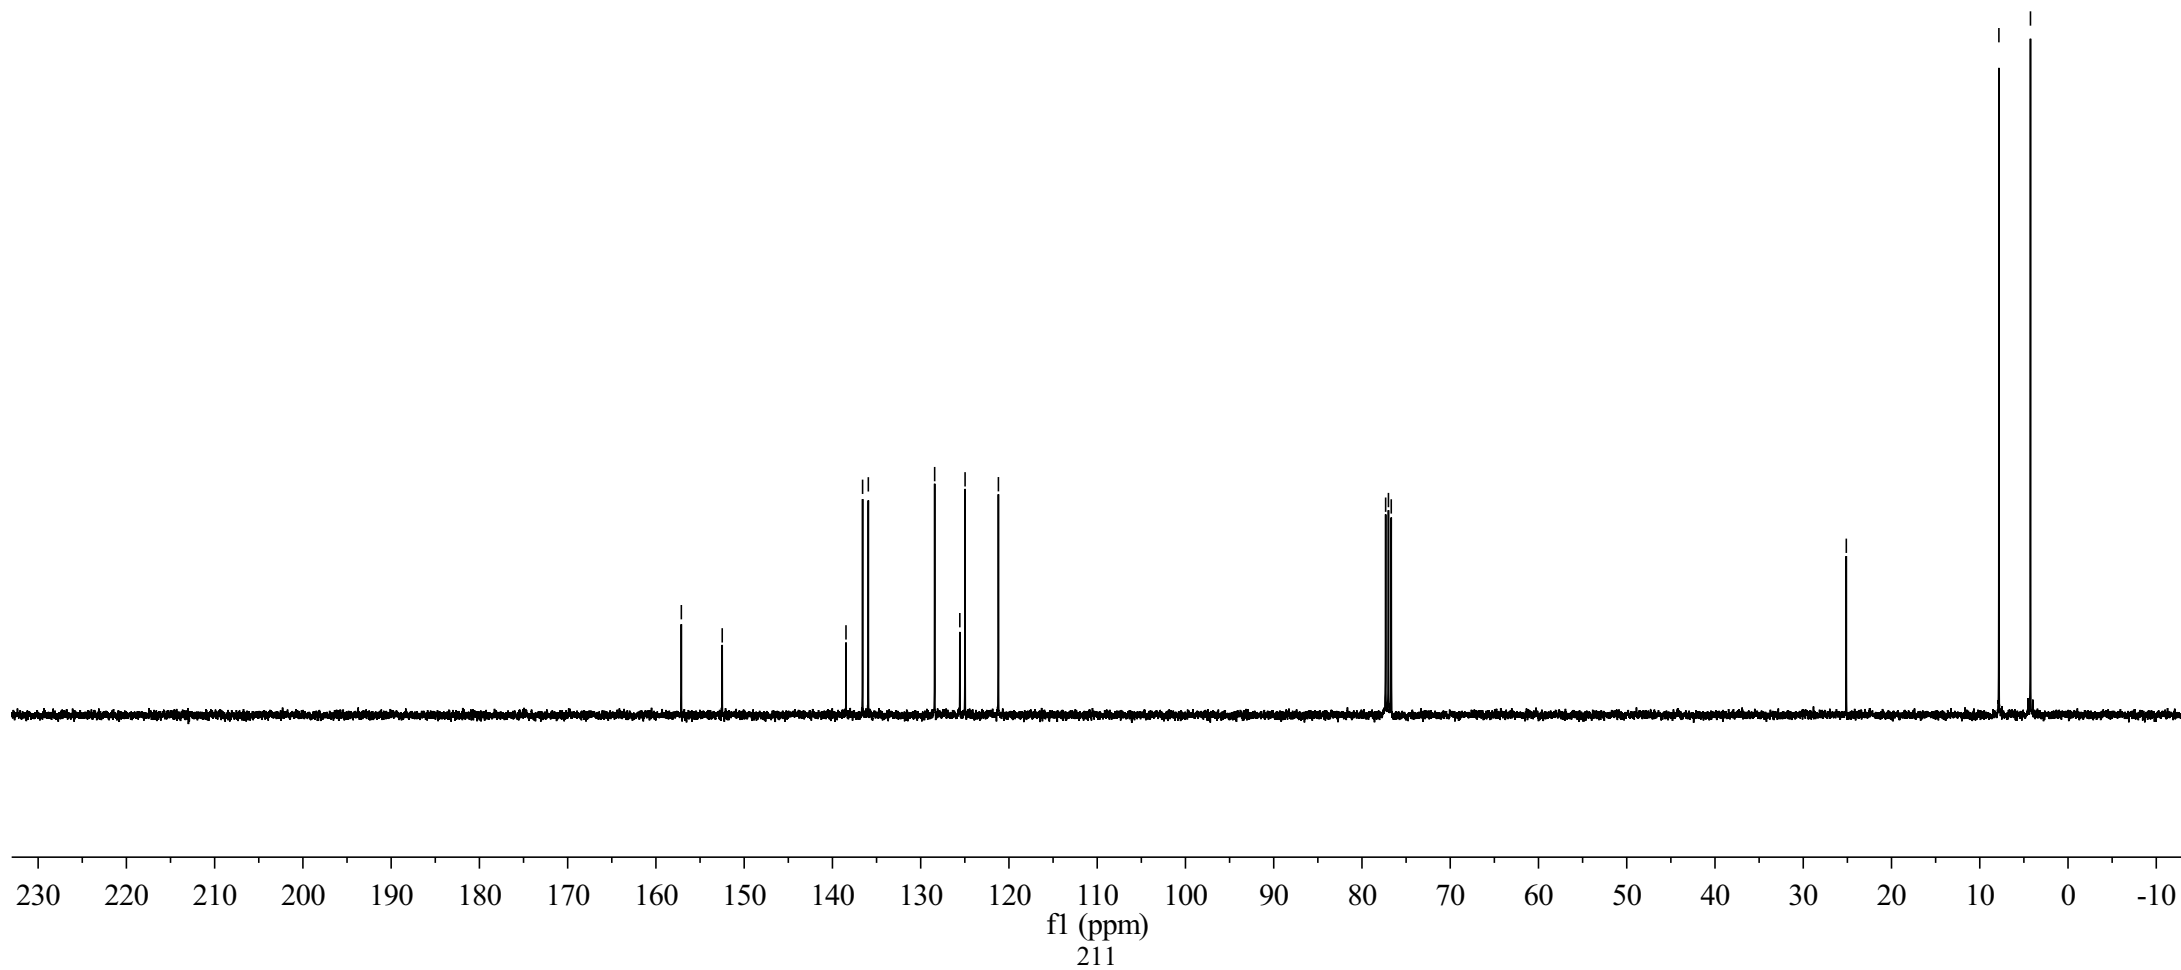

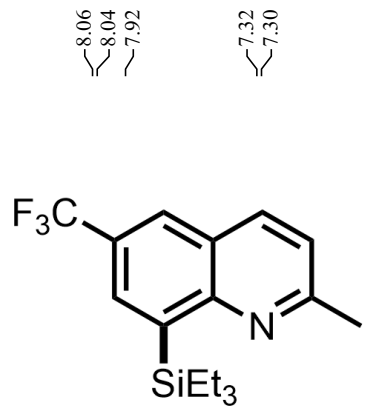

6n

<sup>1</sup>H NMR spectrum (400 MHz, CDCl<sub>3</sub>)

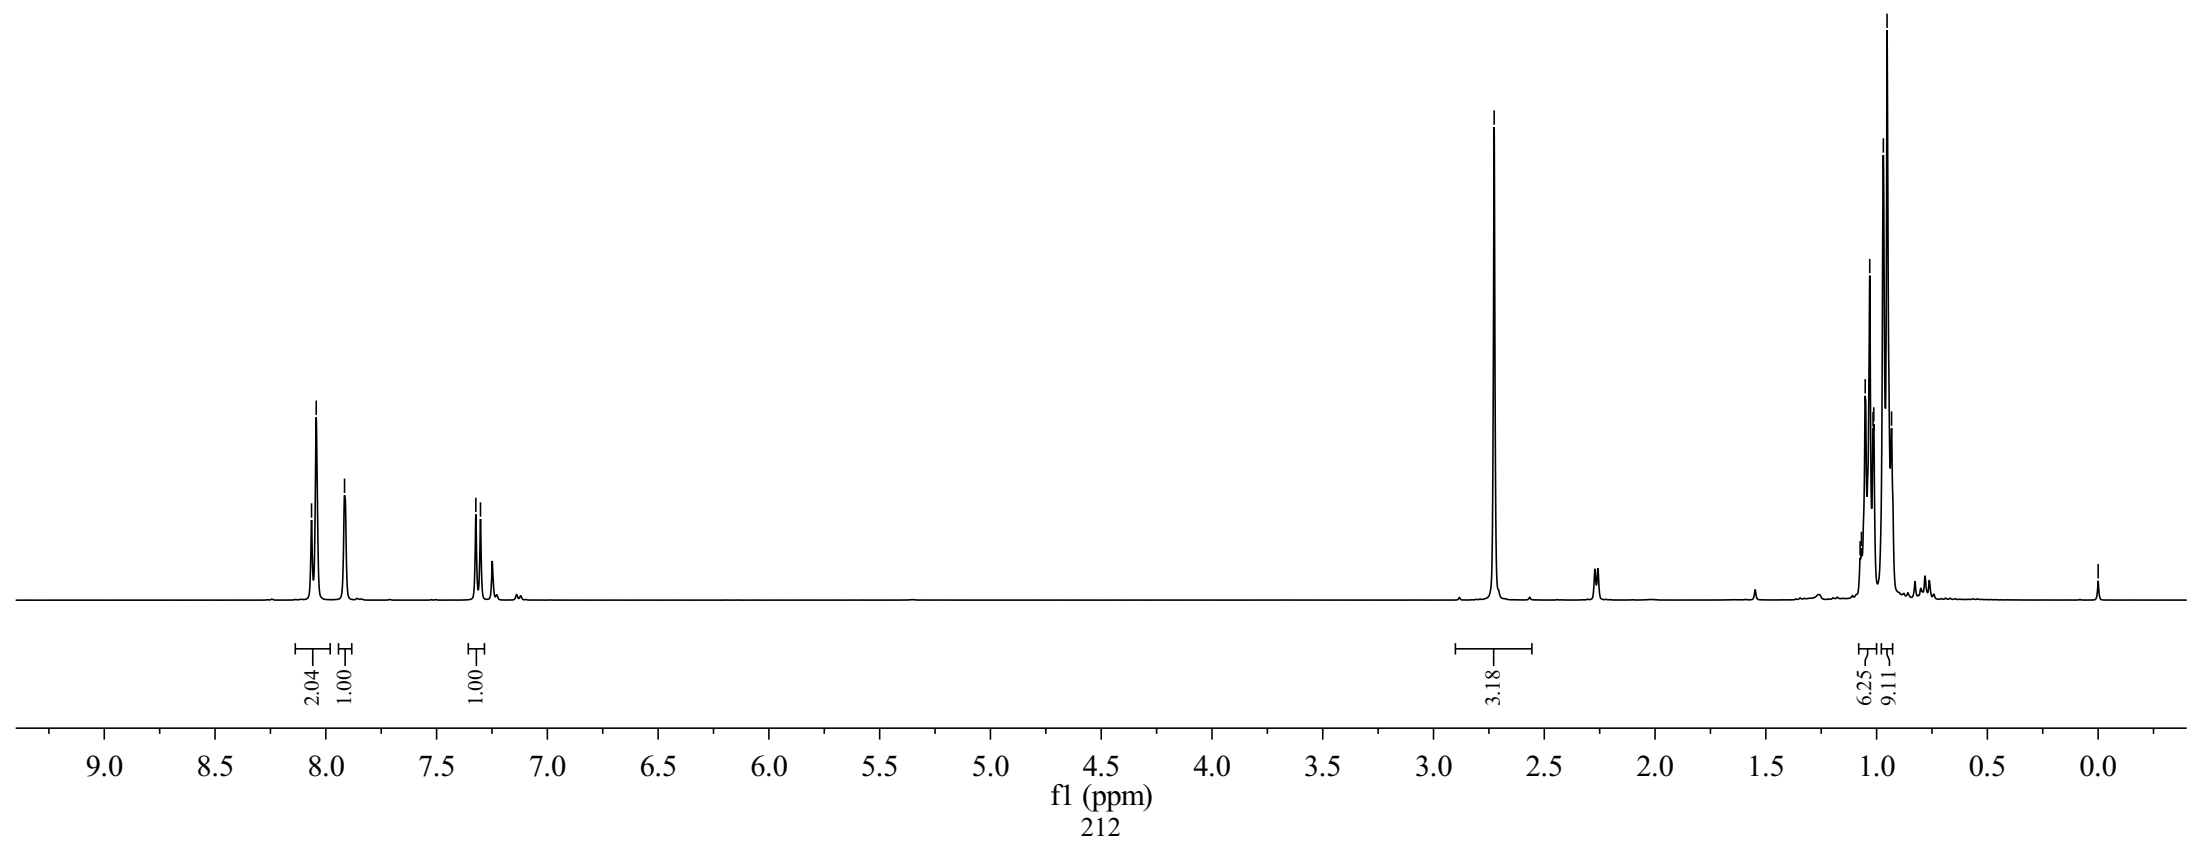

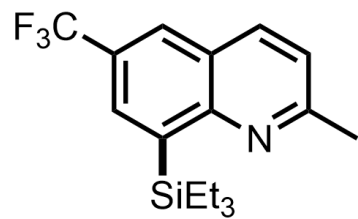

**6n**

**<sup>13</sup>C NMR spectrum (100 MHz, CDCl<sub>3</sub>)**

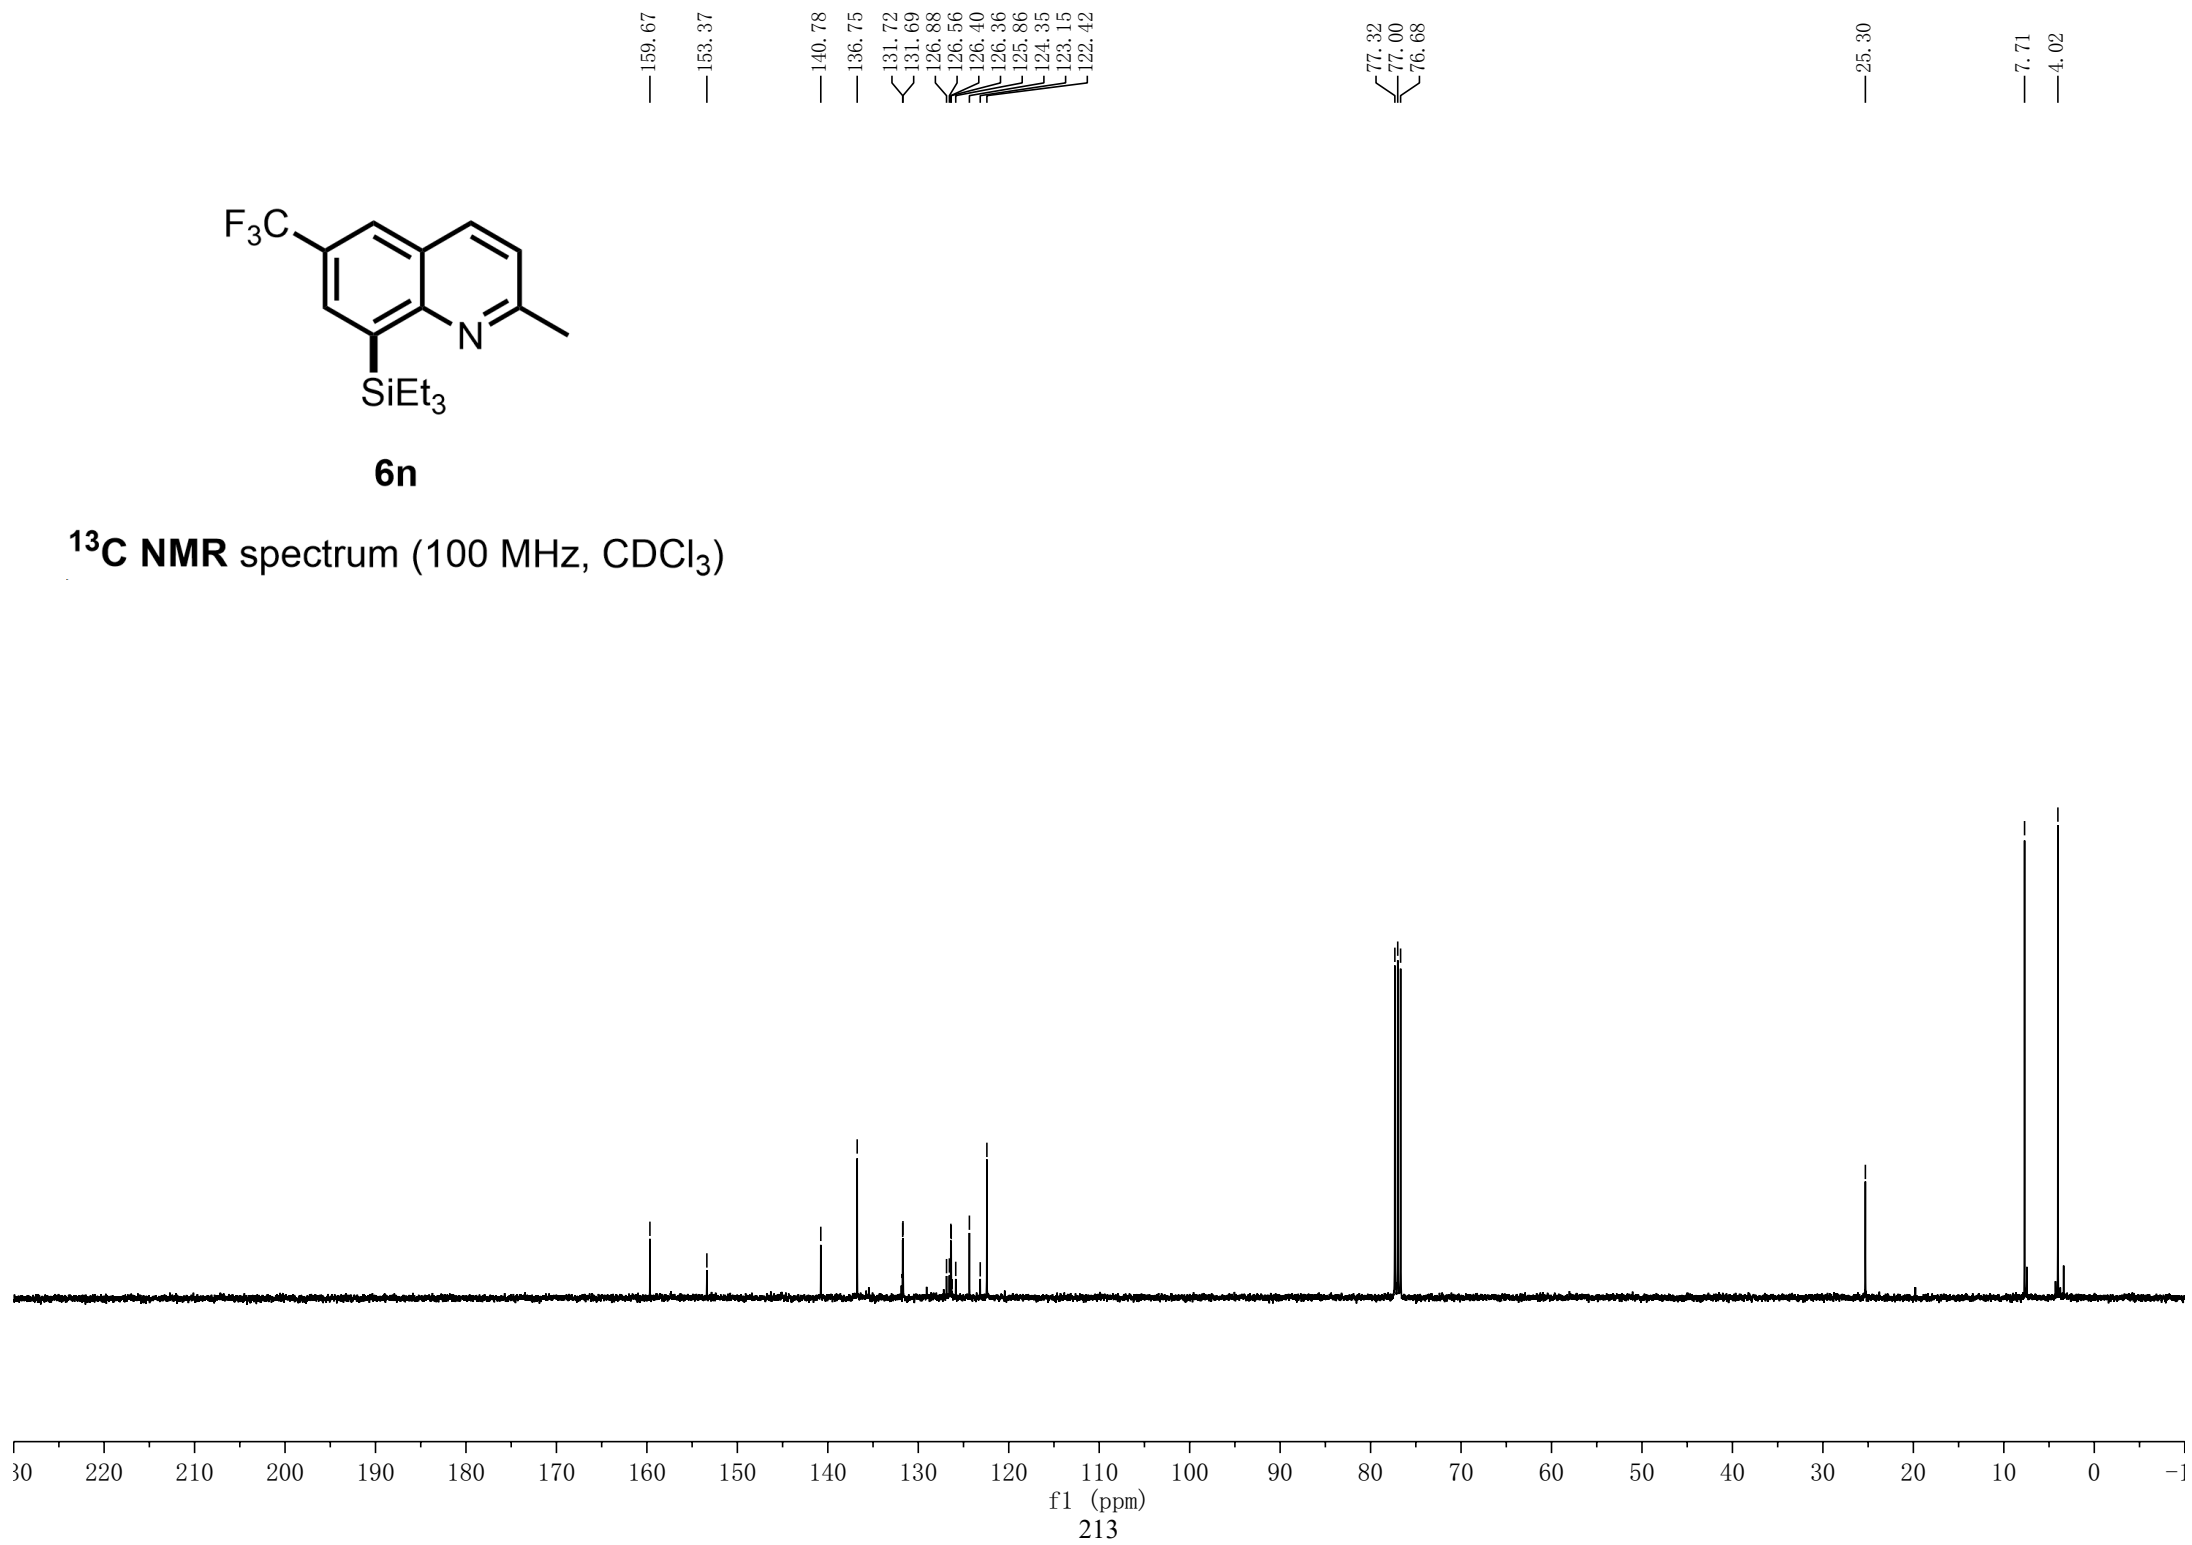

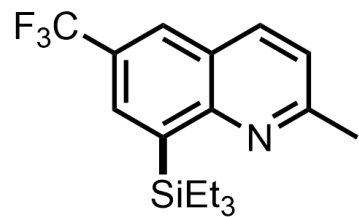

6n

<sup>19</sup>F NMR spectrum (564 MHz, CDCl<sub>3</sub>)

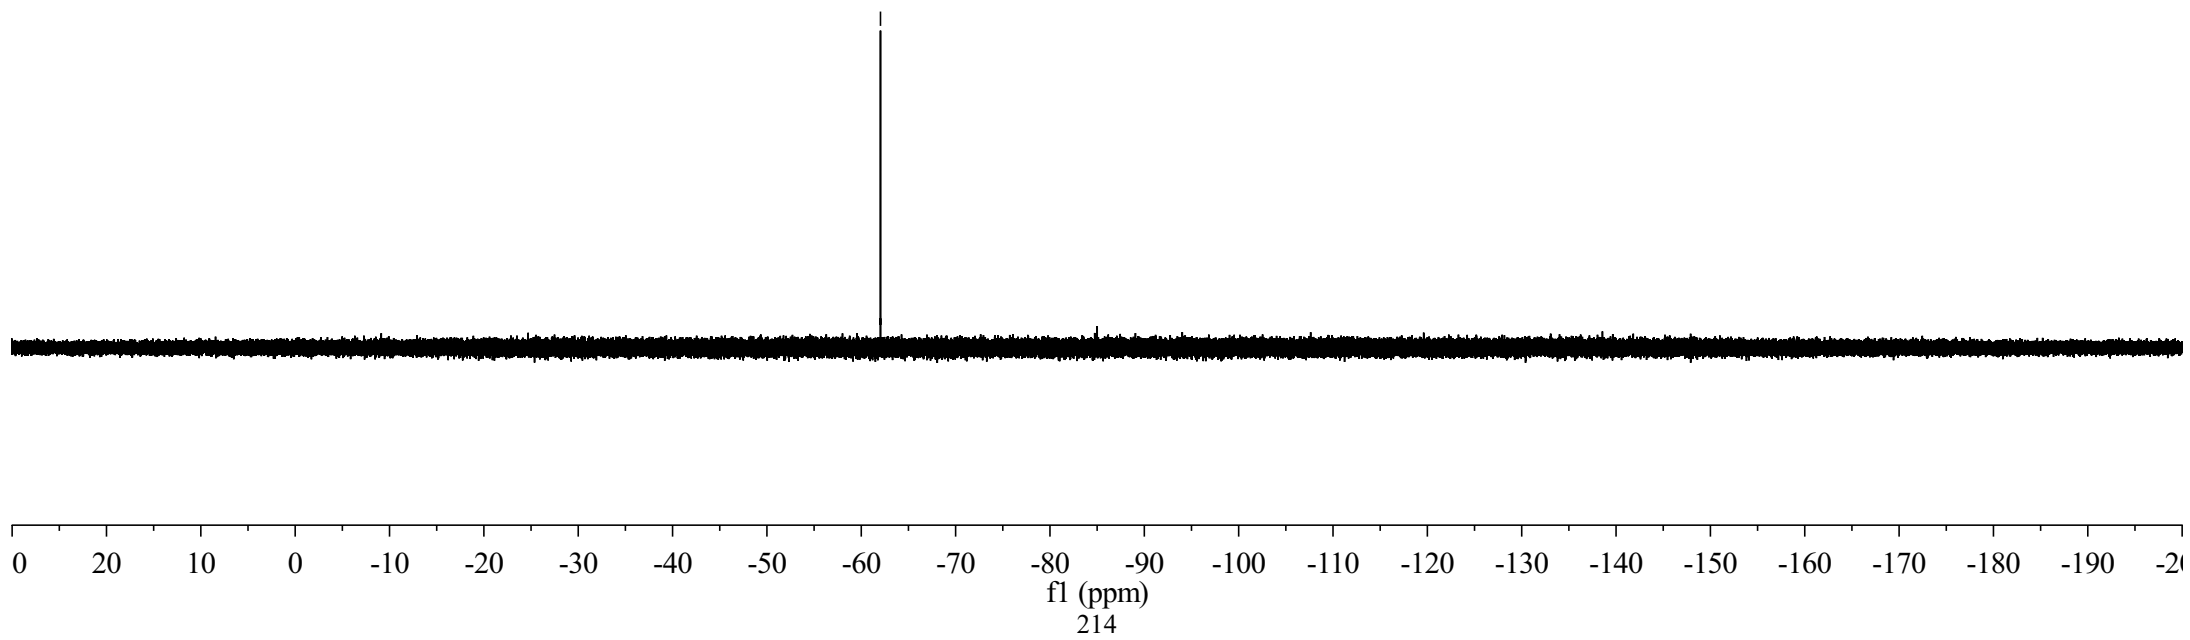

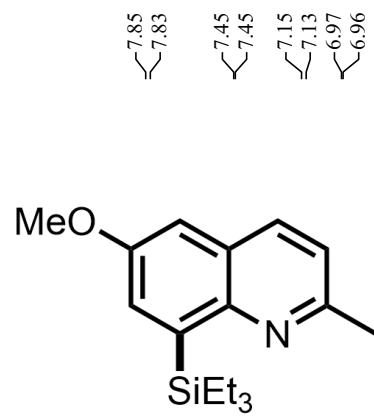

**6o**

<sup>1</sup>H NMR spectrum (400 MHz, CDCl<sub>3</sub>)

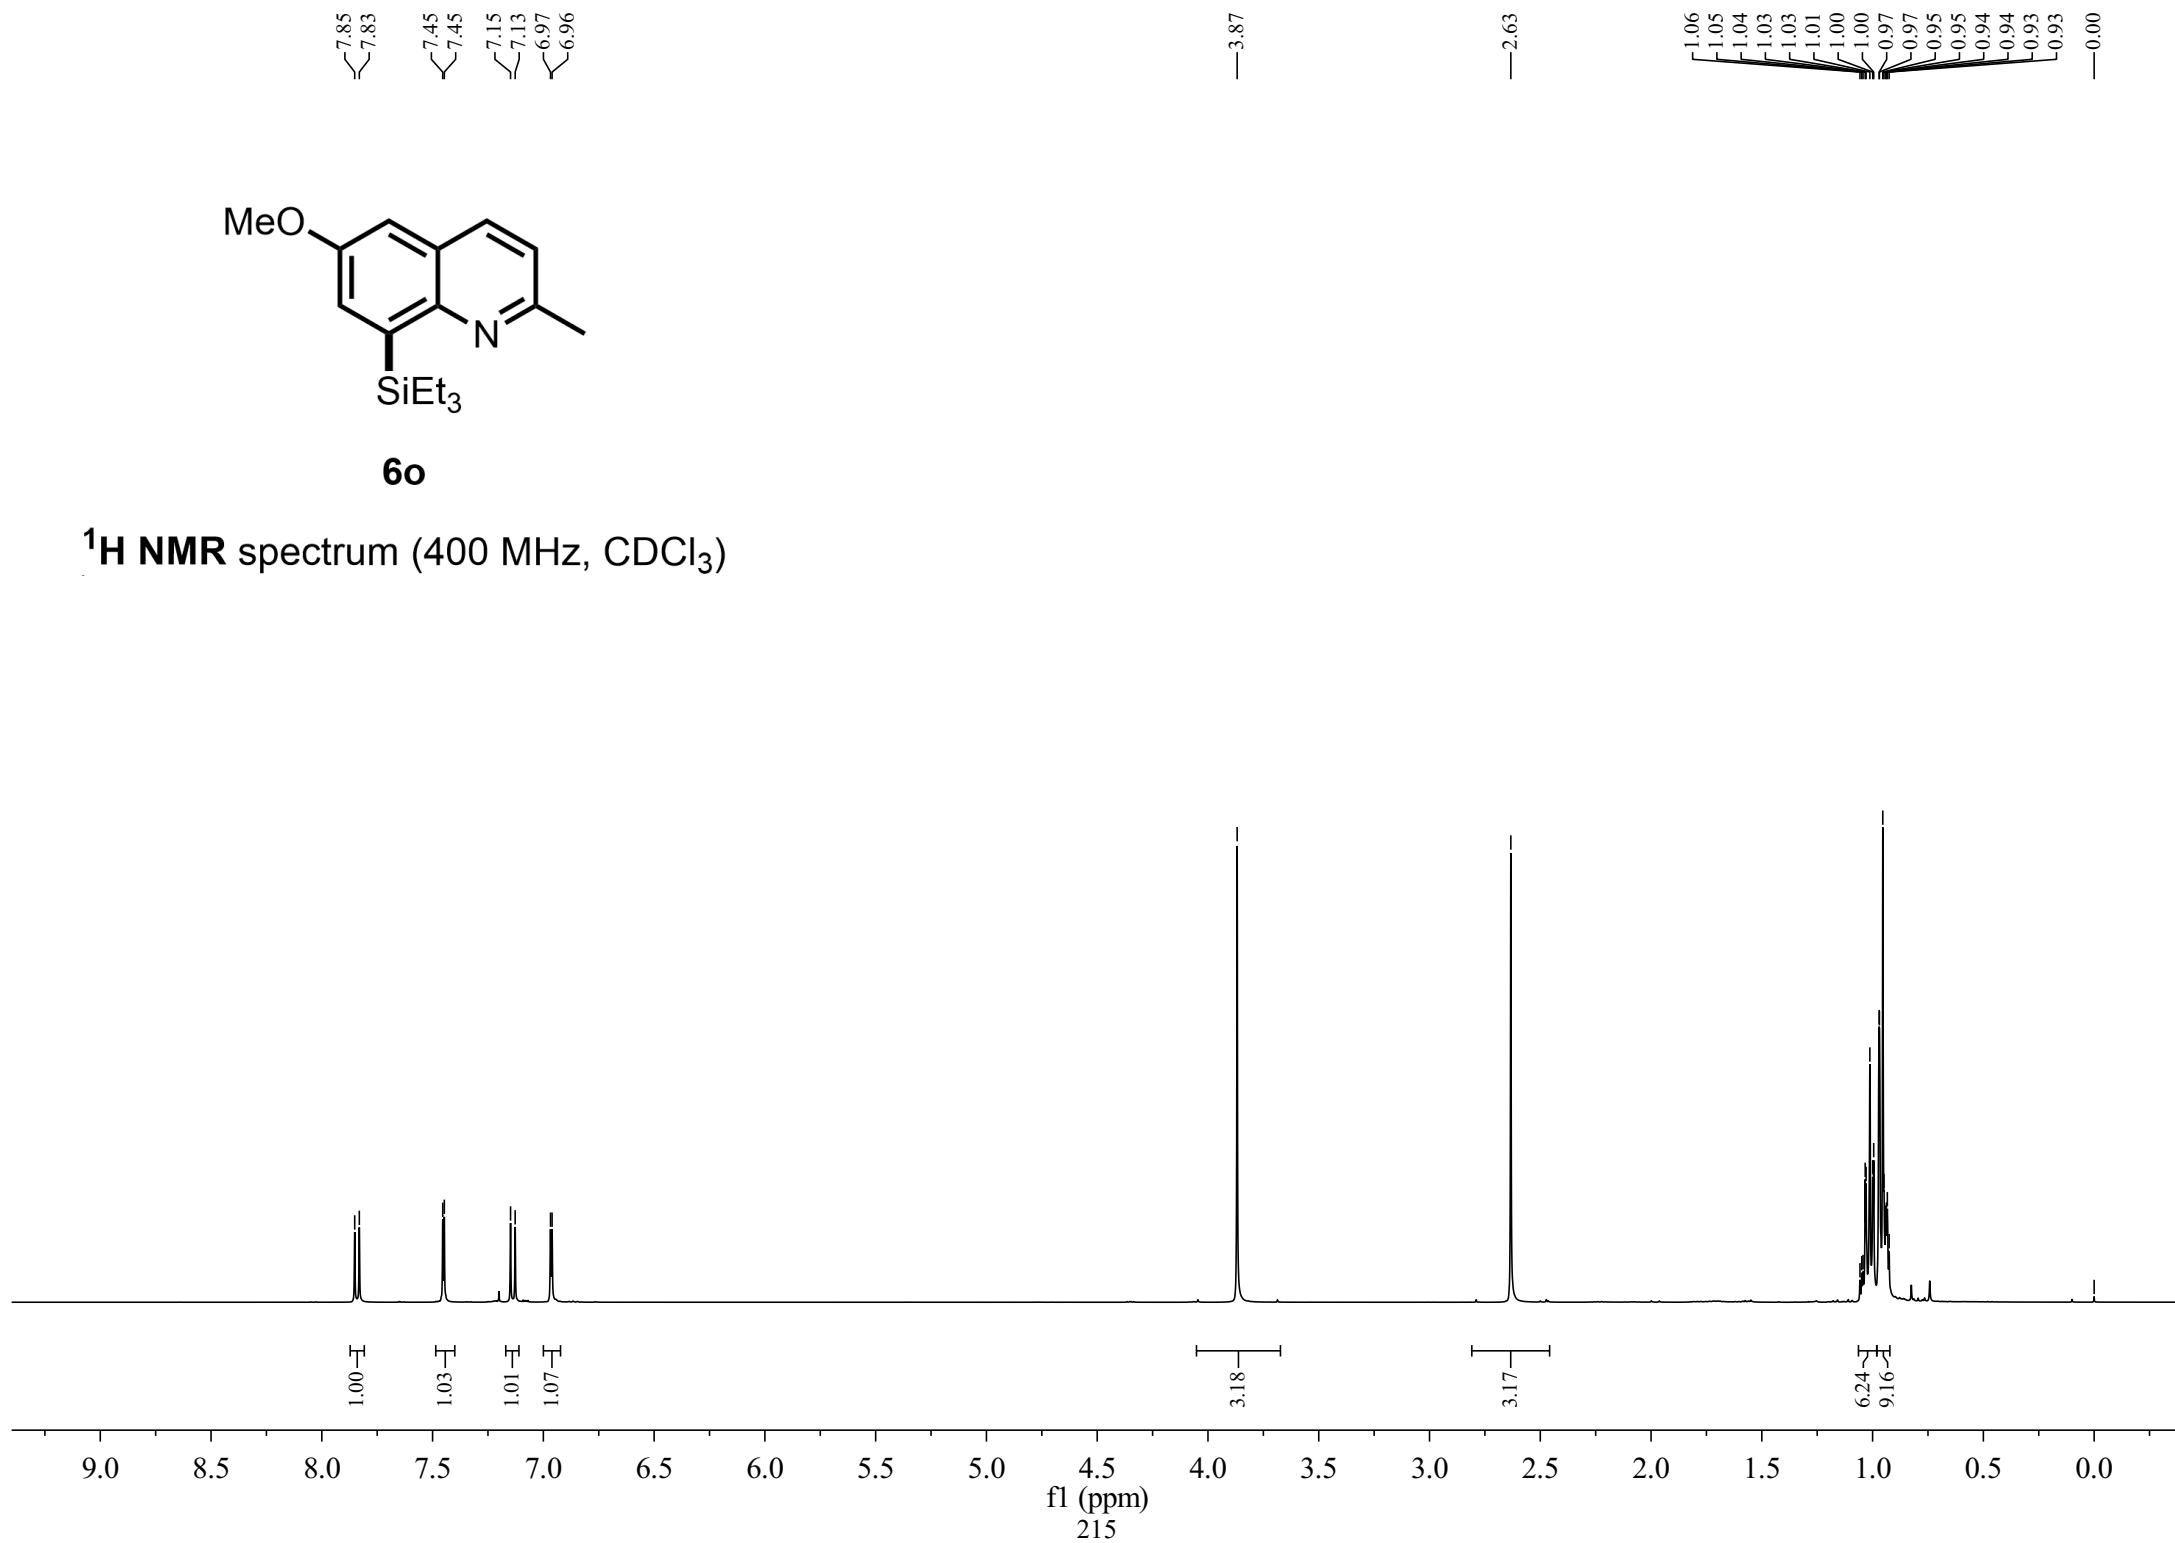

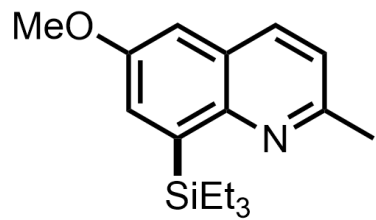

**6o**

<sup>13</sup>C NMR spectrum (100 MHz, CDCl<sub>3</sub>)

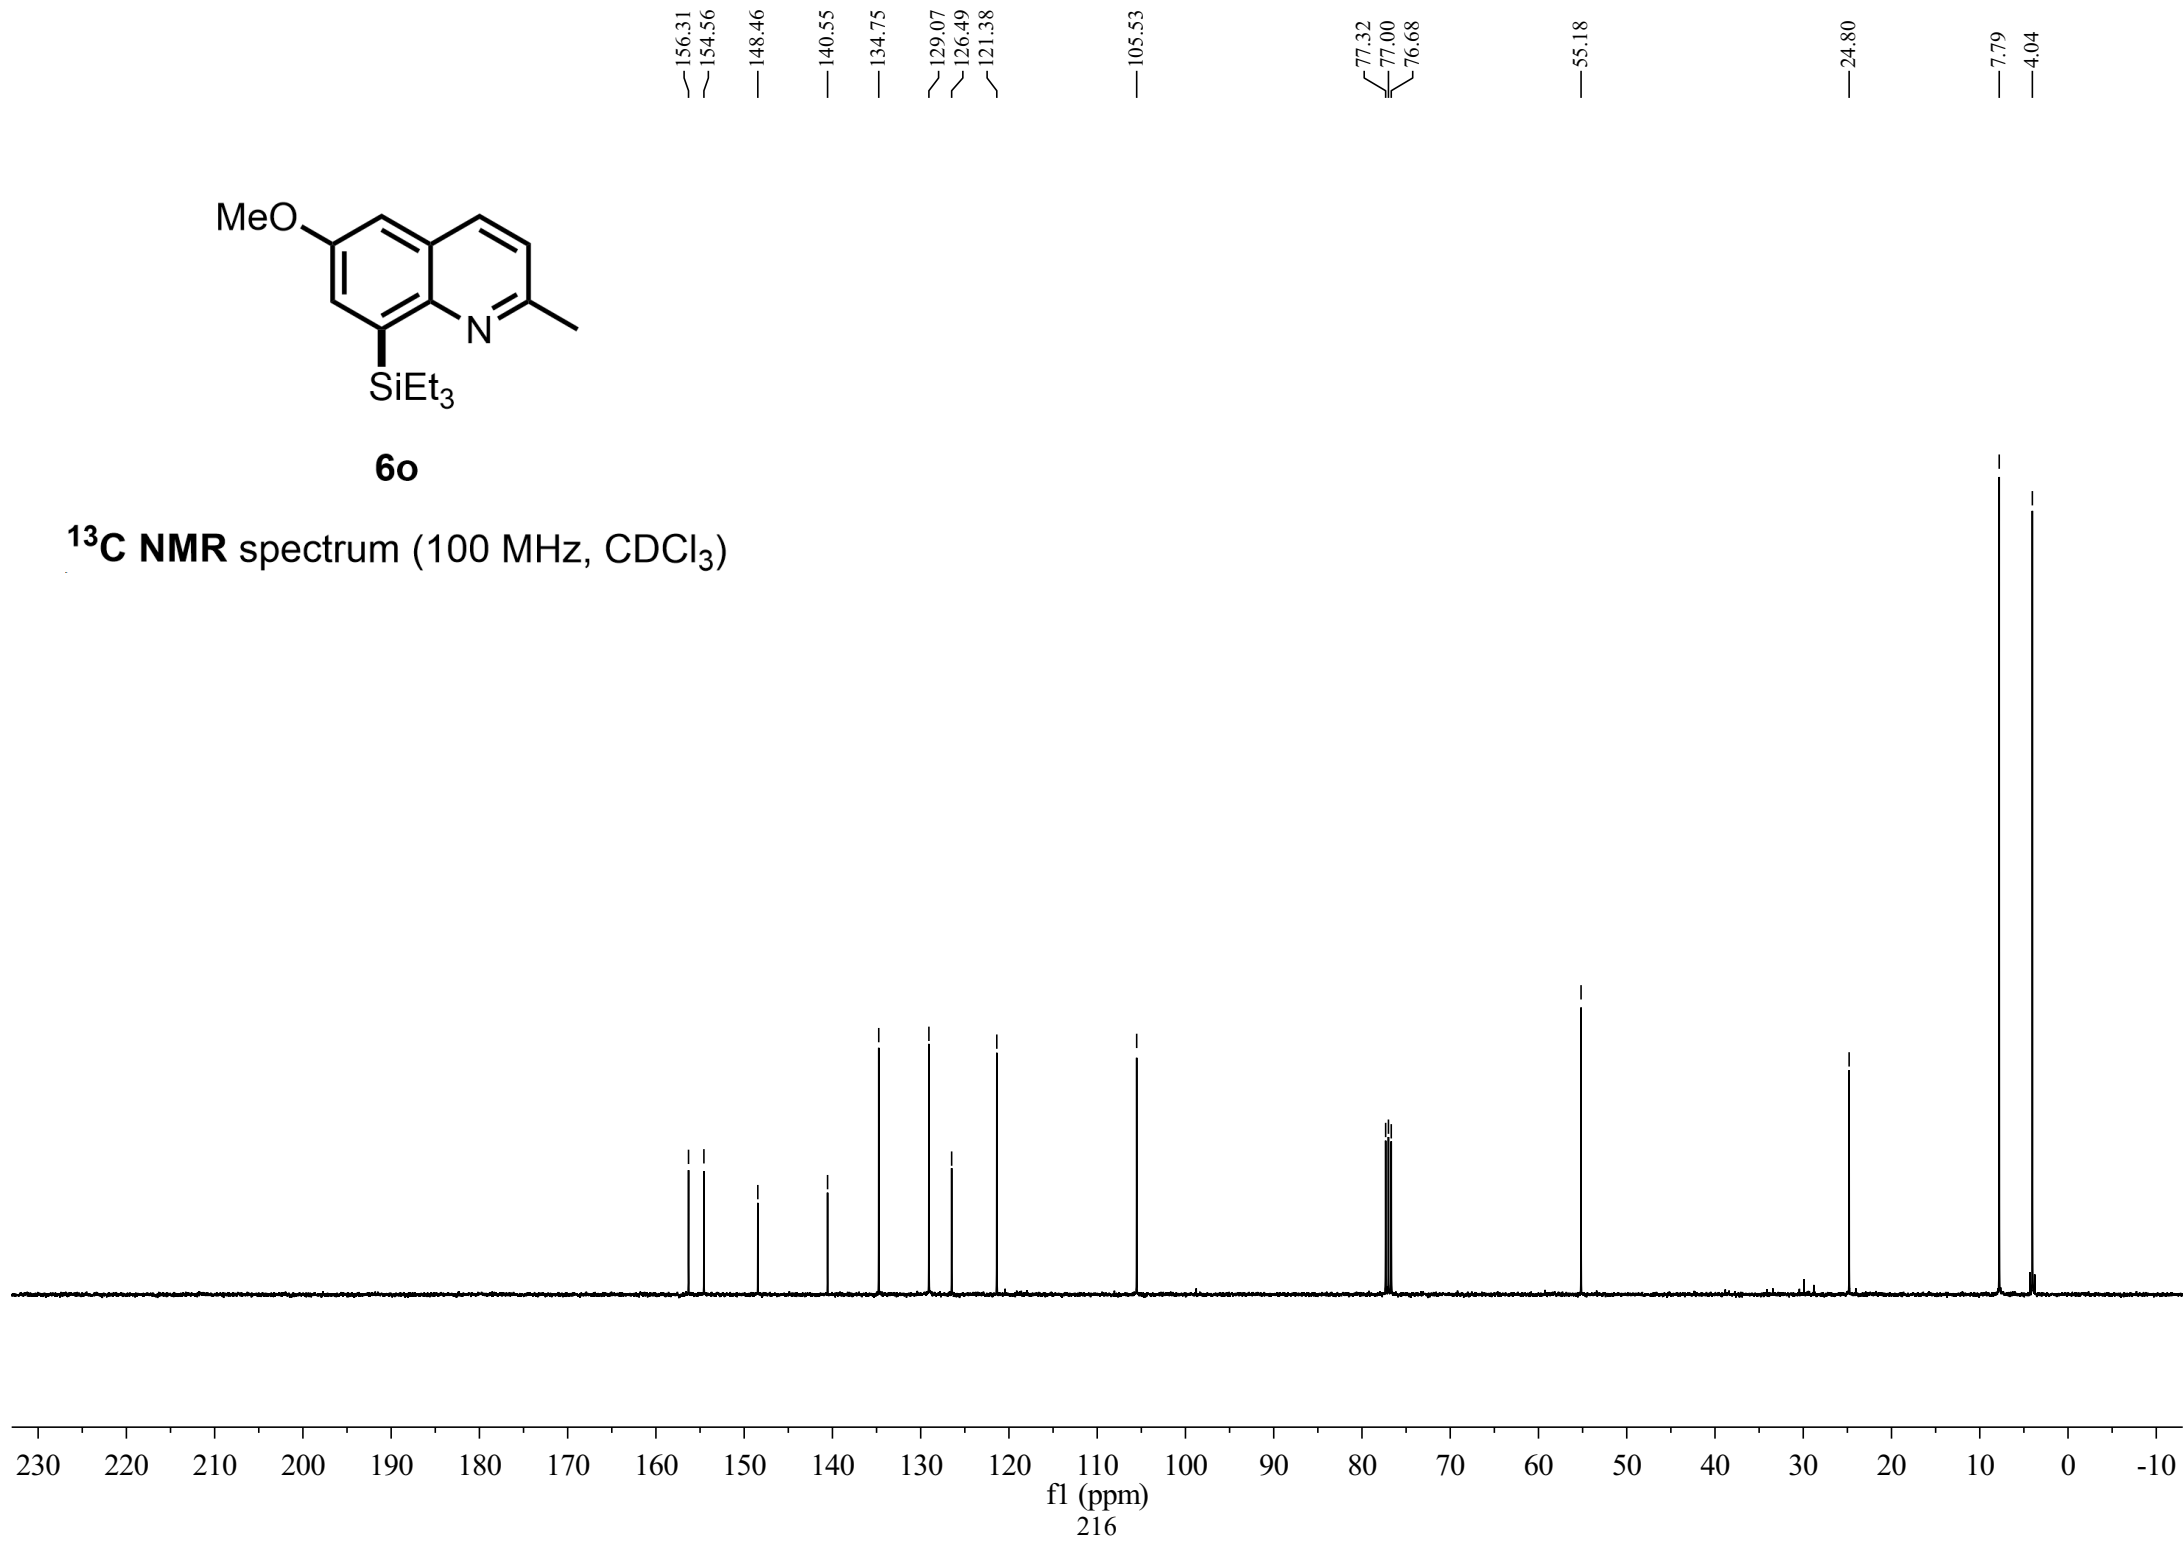



8.70  
8.23  
8.21  
7.98  
7.96  
7.91  
7.90  
7.90  
7.75  
7.73  
7.72  
7.71  
7.52  
7.51  
7.49  
7.49  
7.47

1.16  
1.14  
1.12  
1.10  
1.01  
0.99  
0.97

0.00

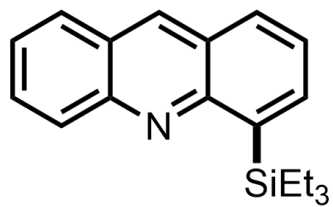

6p

<sup>1</sup>H NMR spectrum (400 MHz, CDCl<sub>3</sub>)

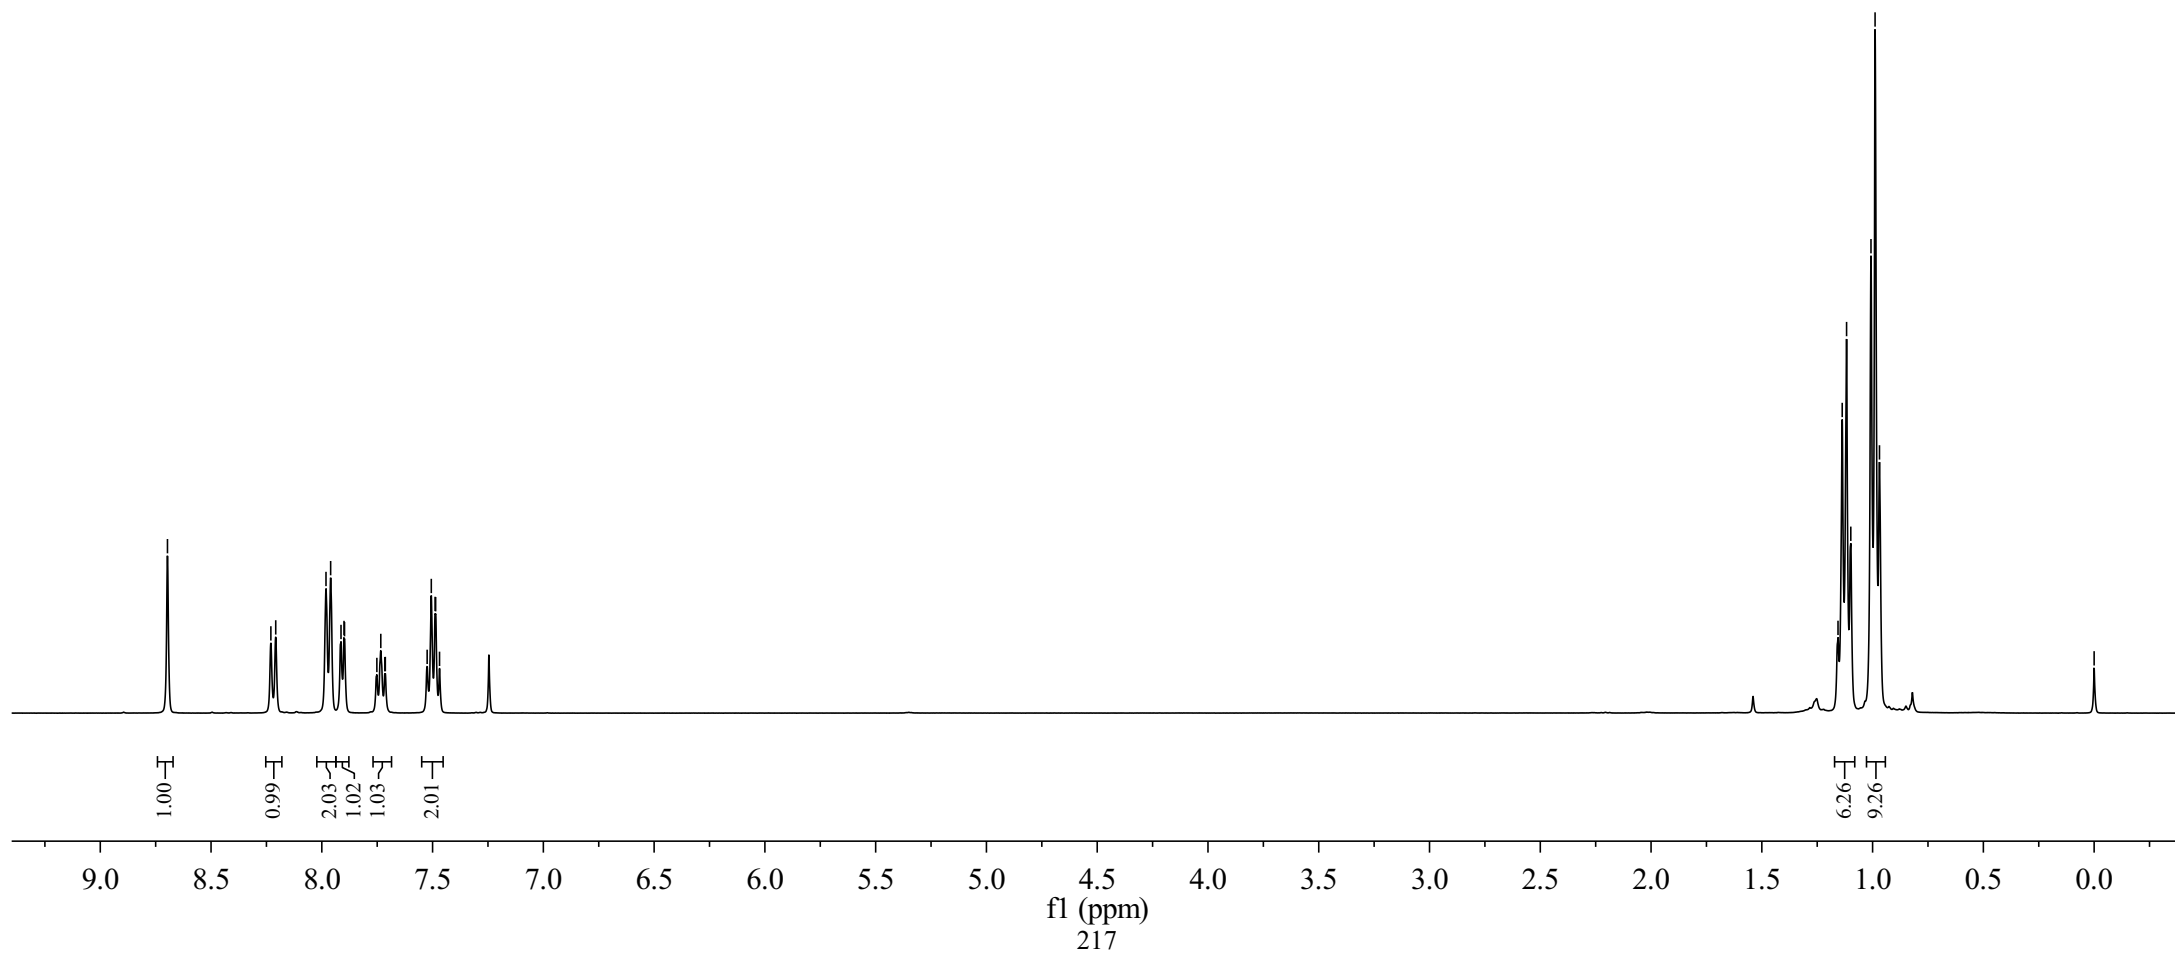

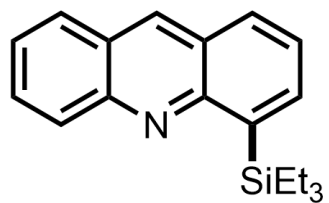

**6p**

**<sup>13</sup>C NMR spectrum (100 MHz, CDCl<sub>3</sub>)**

153.13  
148.06  
139.54  
137.83  
135.52  
129.90  
129.36  
129.08  
127.91  
126.14  
126.02  
125.36  
125.30  
77.32  
77.00  
76.68  
-7.89  
-4.11

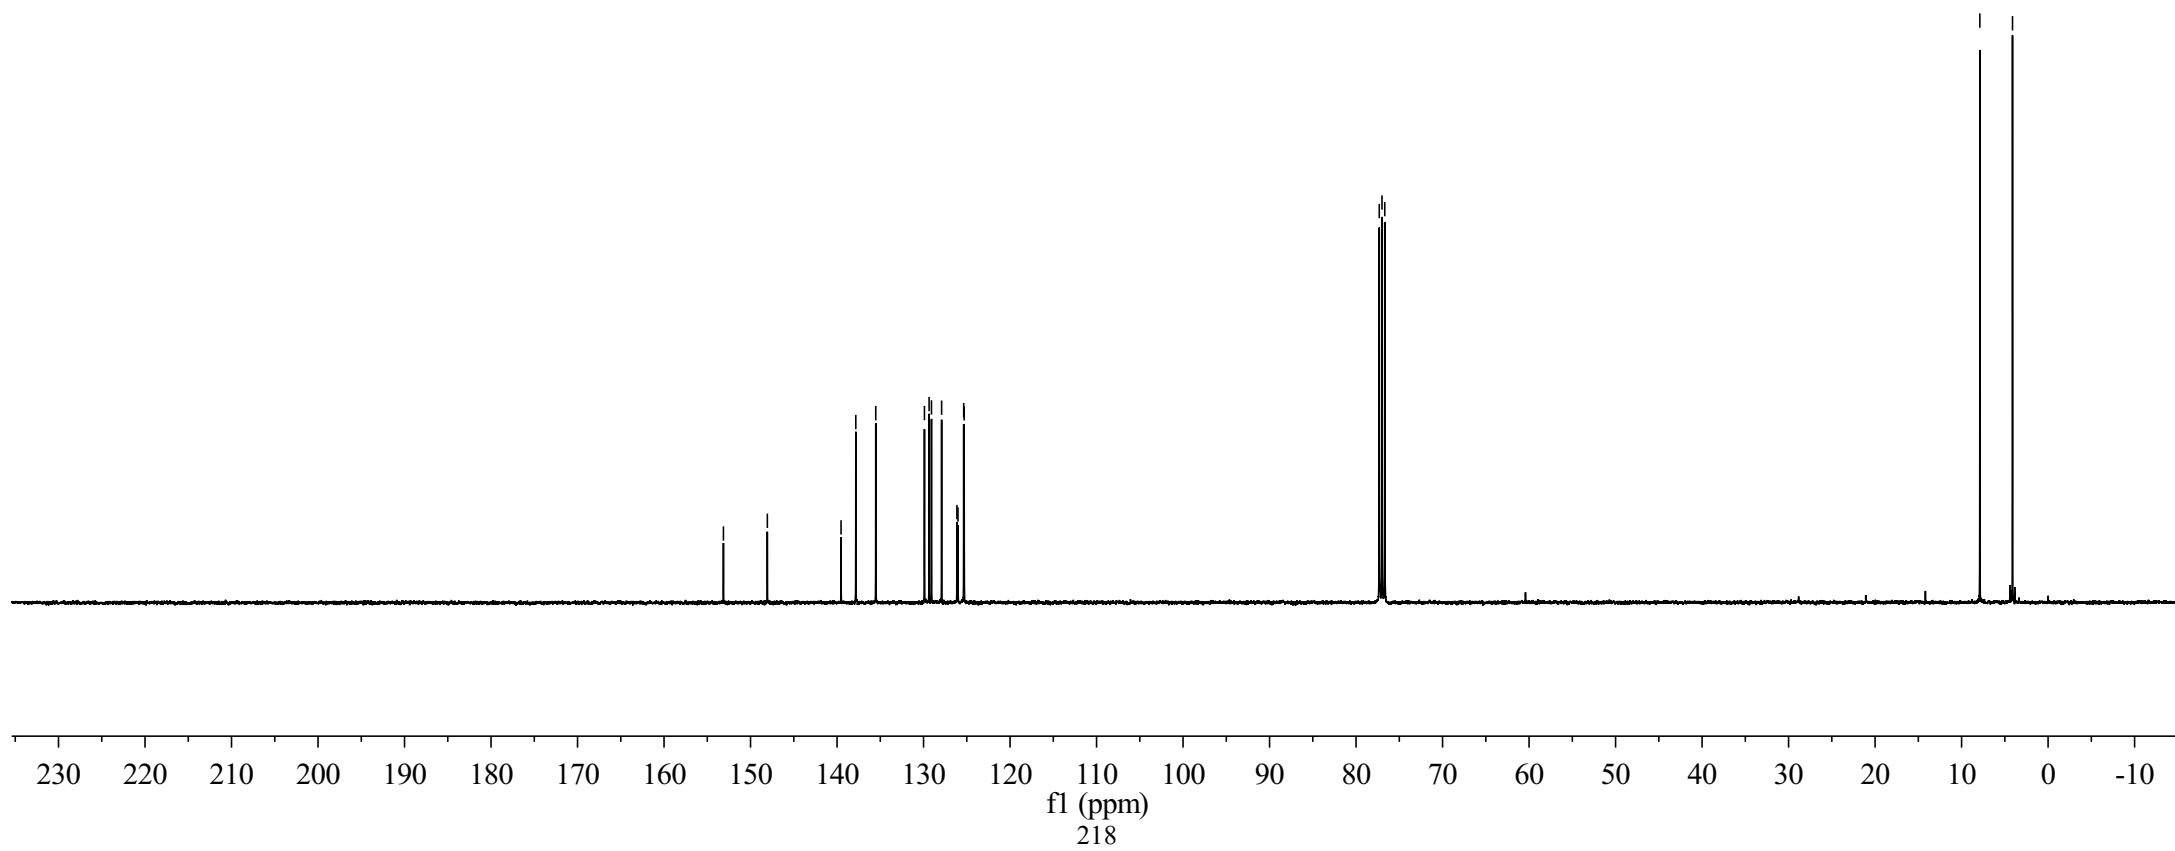

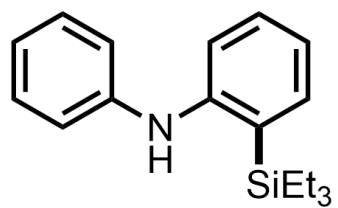

6q

<sup>1</sup>H NMR spectrum (400 MHz, CDCl<sub>3</sub>)

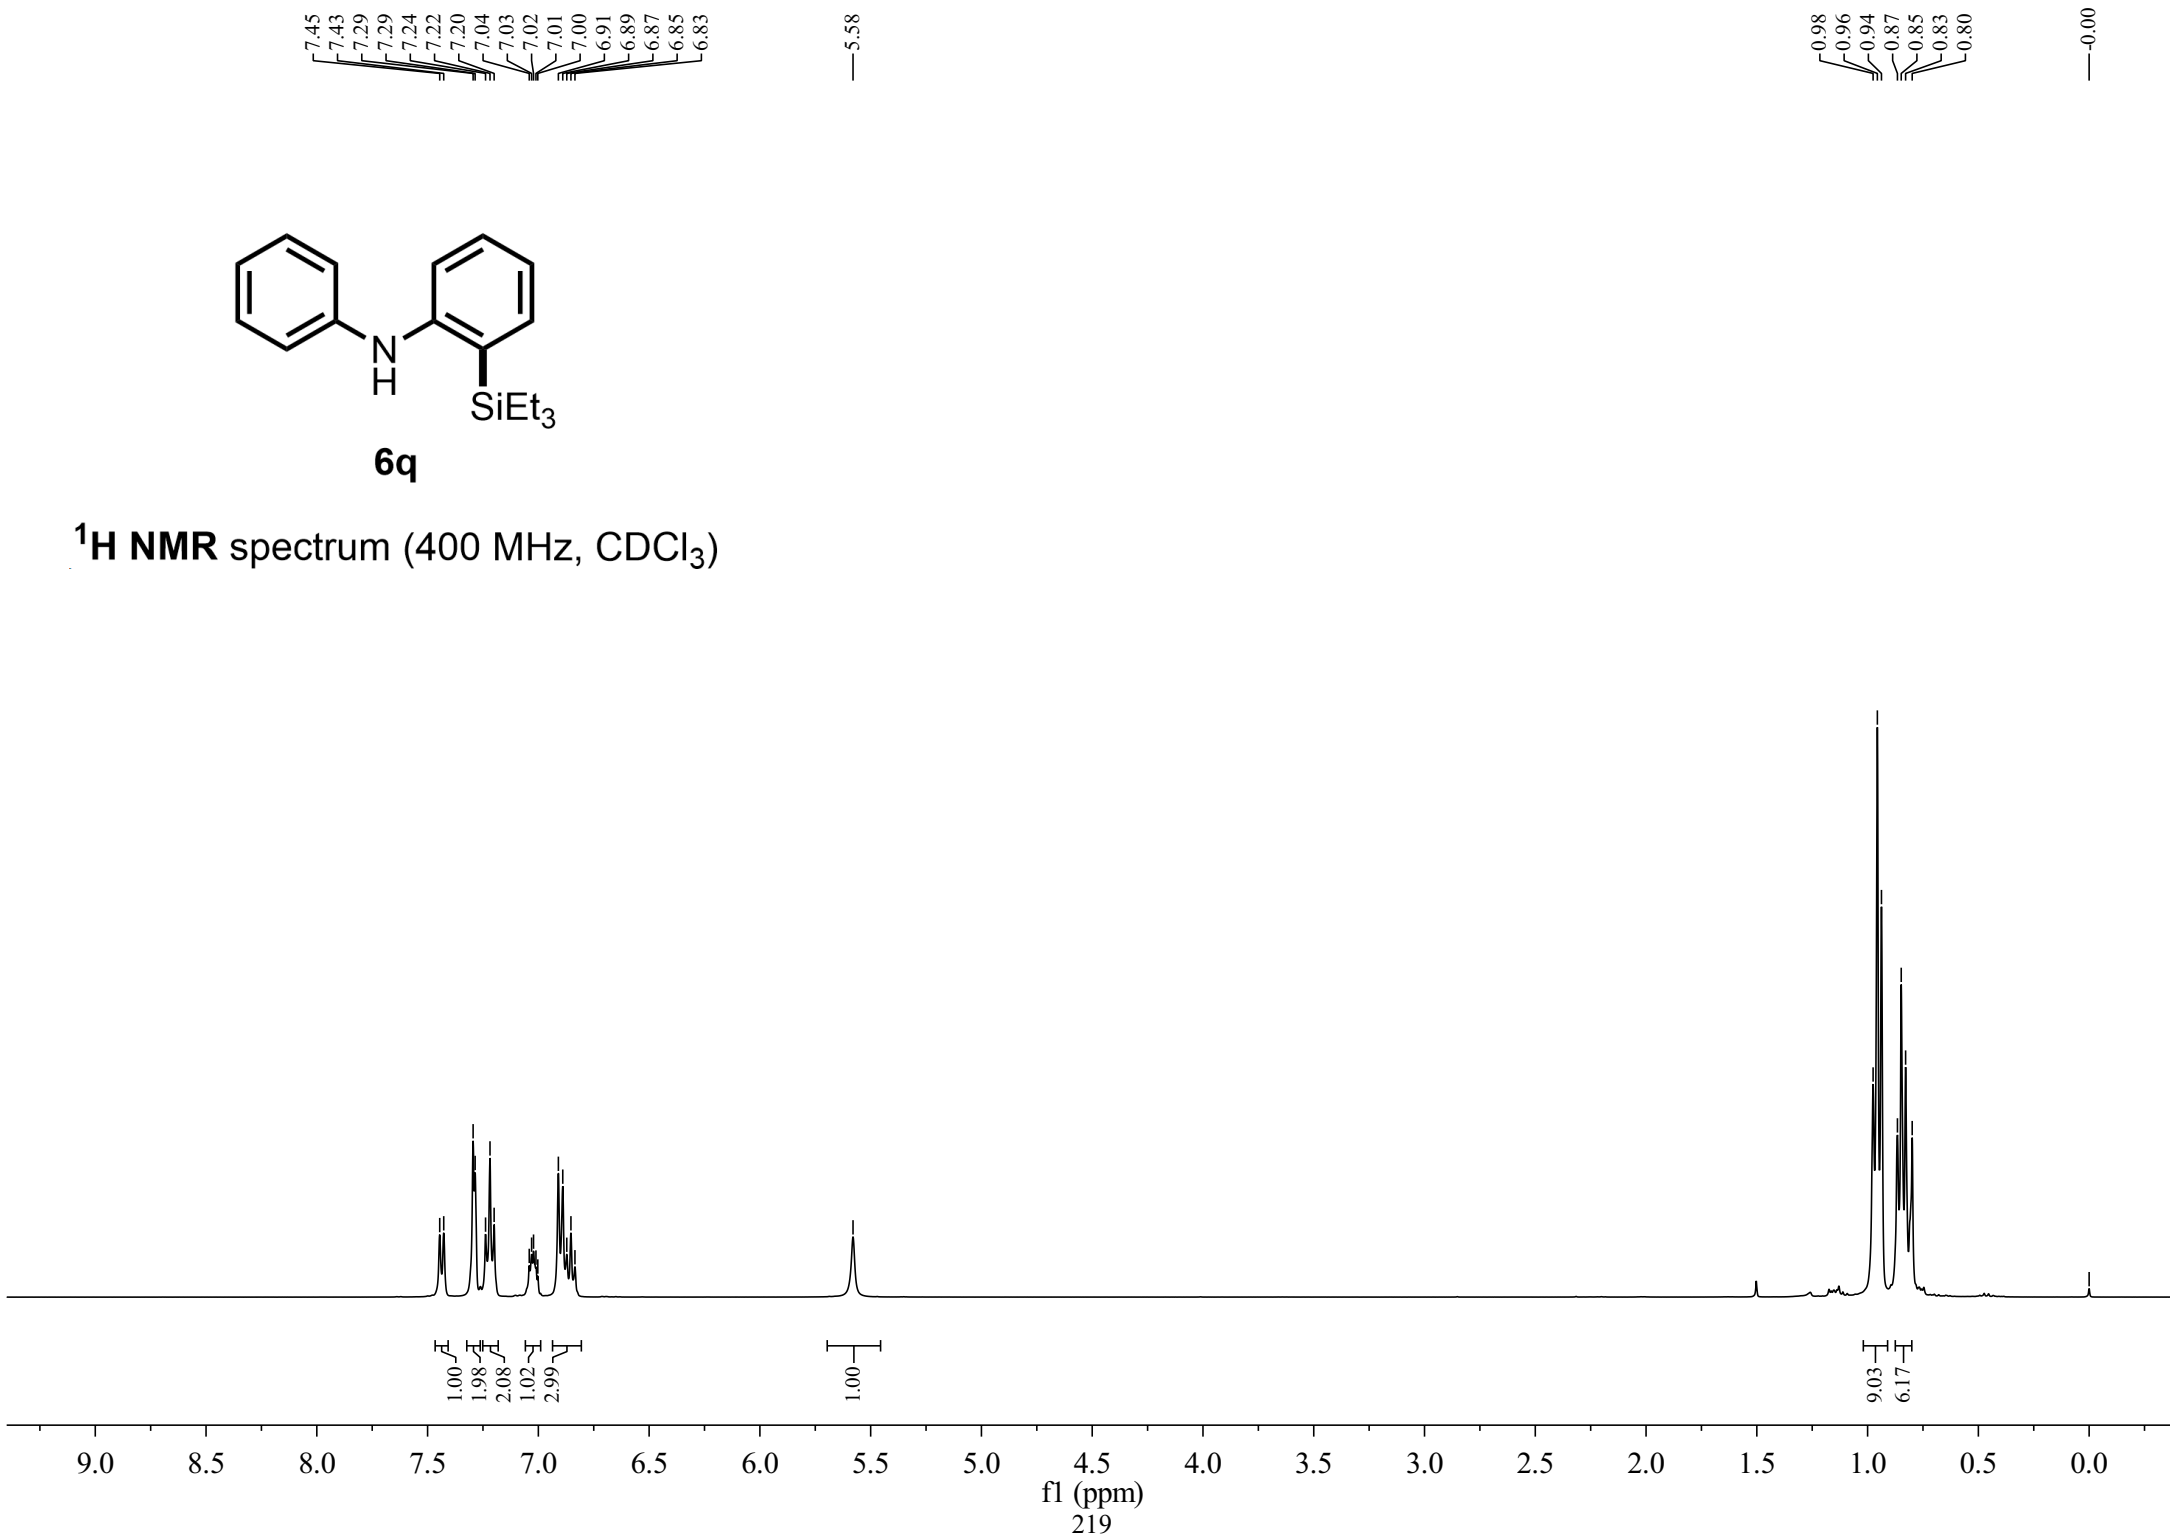

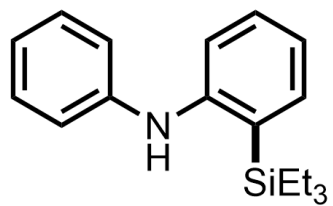

6q

148.14  
144.61  
136.52  
130.02  
129.27  
128.51  
122.24  
120.43  
119.91  
116.52

77.32  
77.00  
76.68

7.58  
3.83

<sup>13</sup>C NMR spectrum (100 MHz, CDCl<sub>3</sub>)

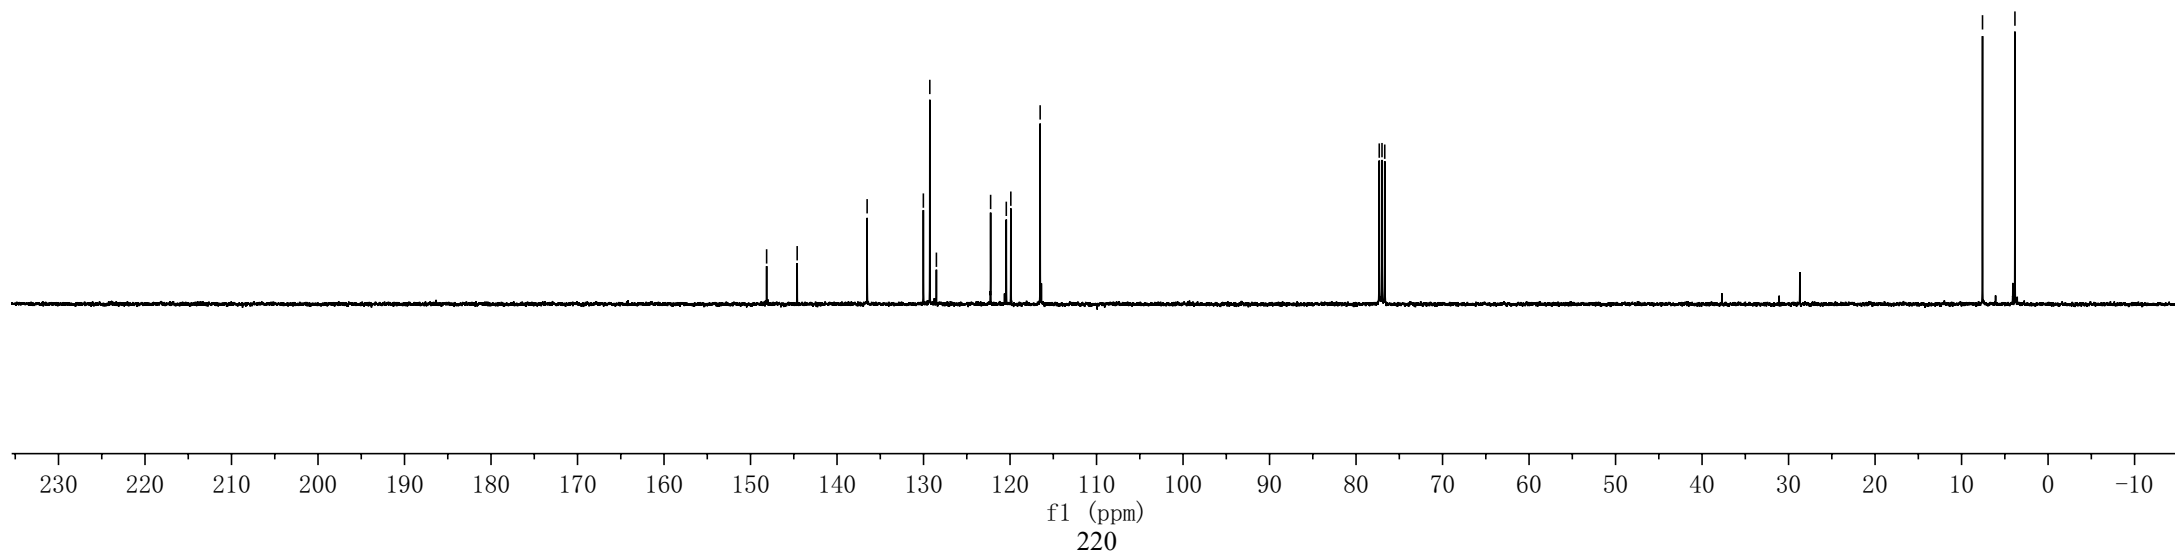

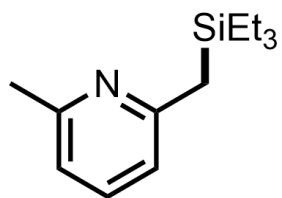

**6r**

**<sup>1</sup>H NMR spectrum (400 MHz, CDCl<sub>3</sub>)**

7.38  
7.36  
7.34  
7.28

6.82  
6.80  
6.77  
6.75

2.47  
2.33

0.92  
0.90  
0.88

0.57  
0.55  
0.53  
0.51

-0.00

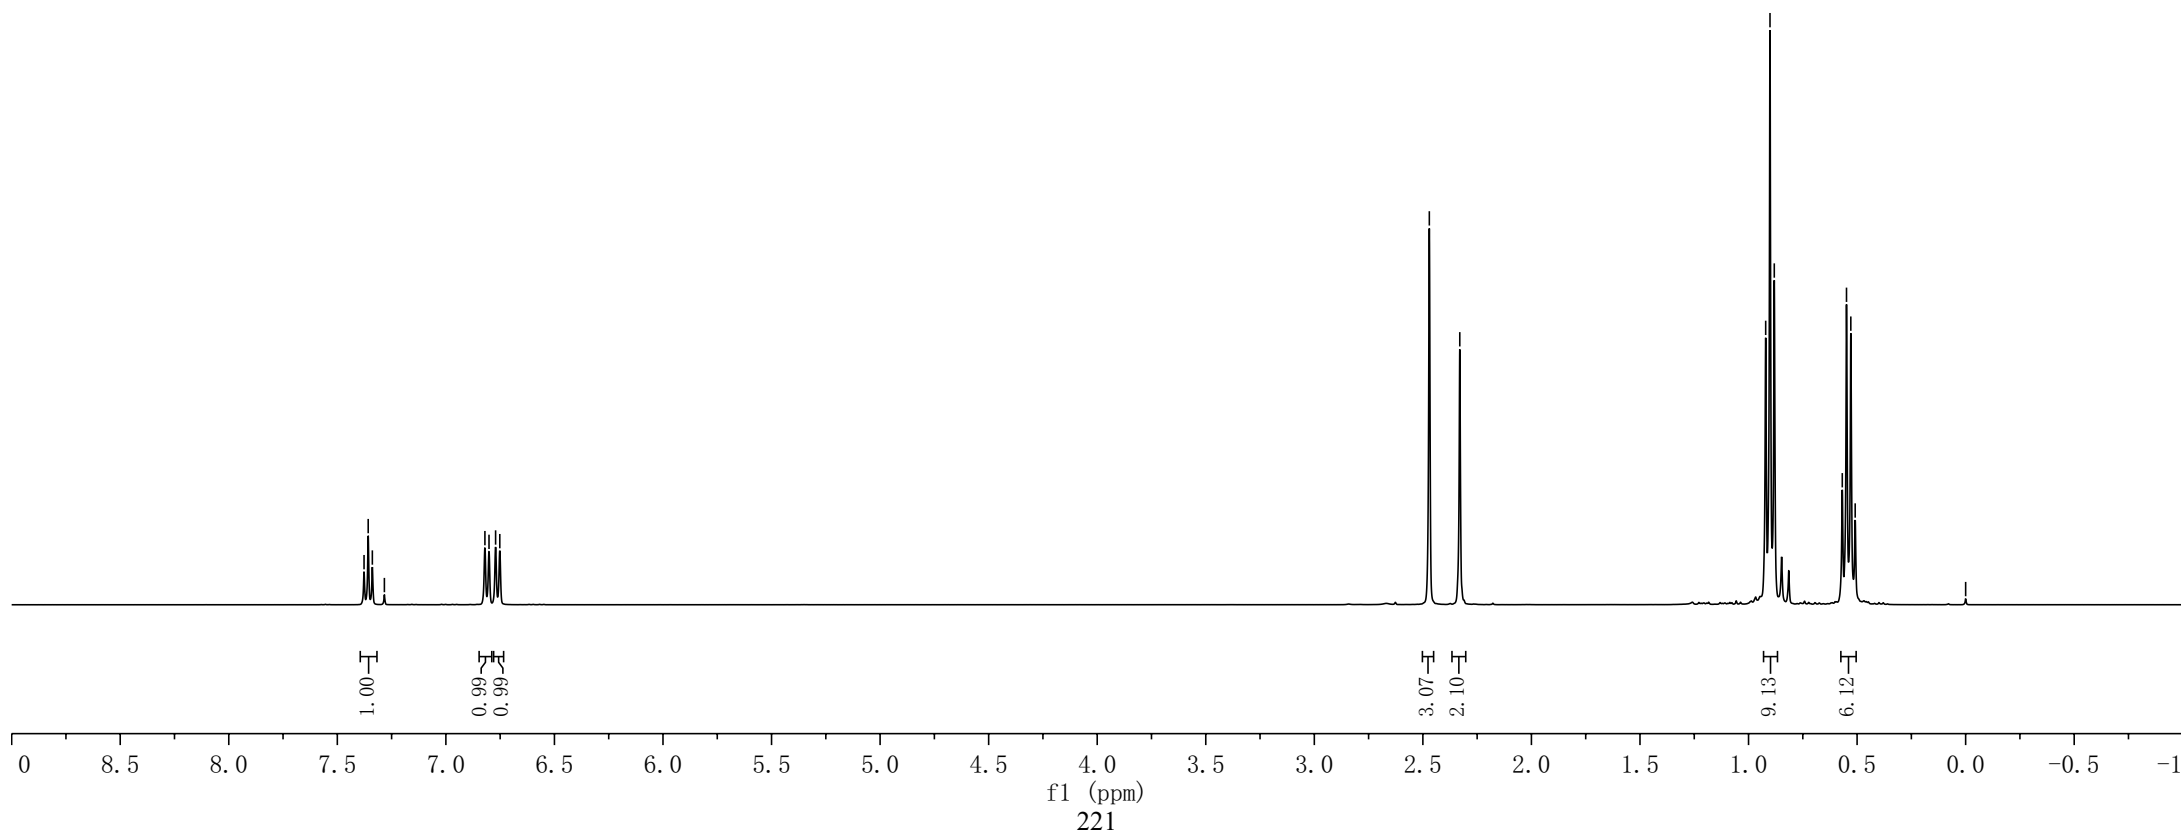

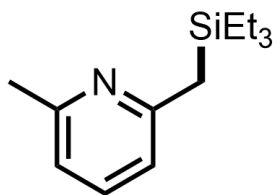

**6r**

**<sup>13</sup>C NMR spectrum (100 MHz, CDCl<sub>3</sub>)**

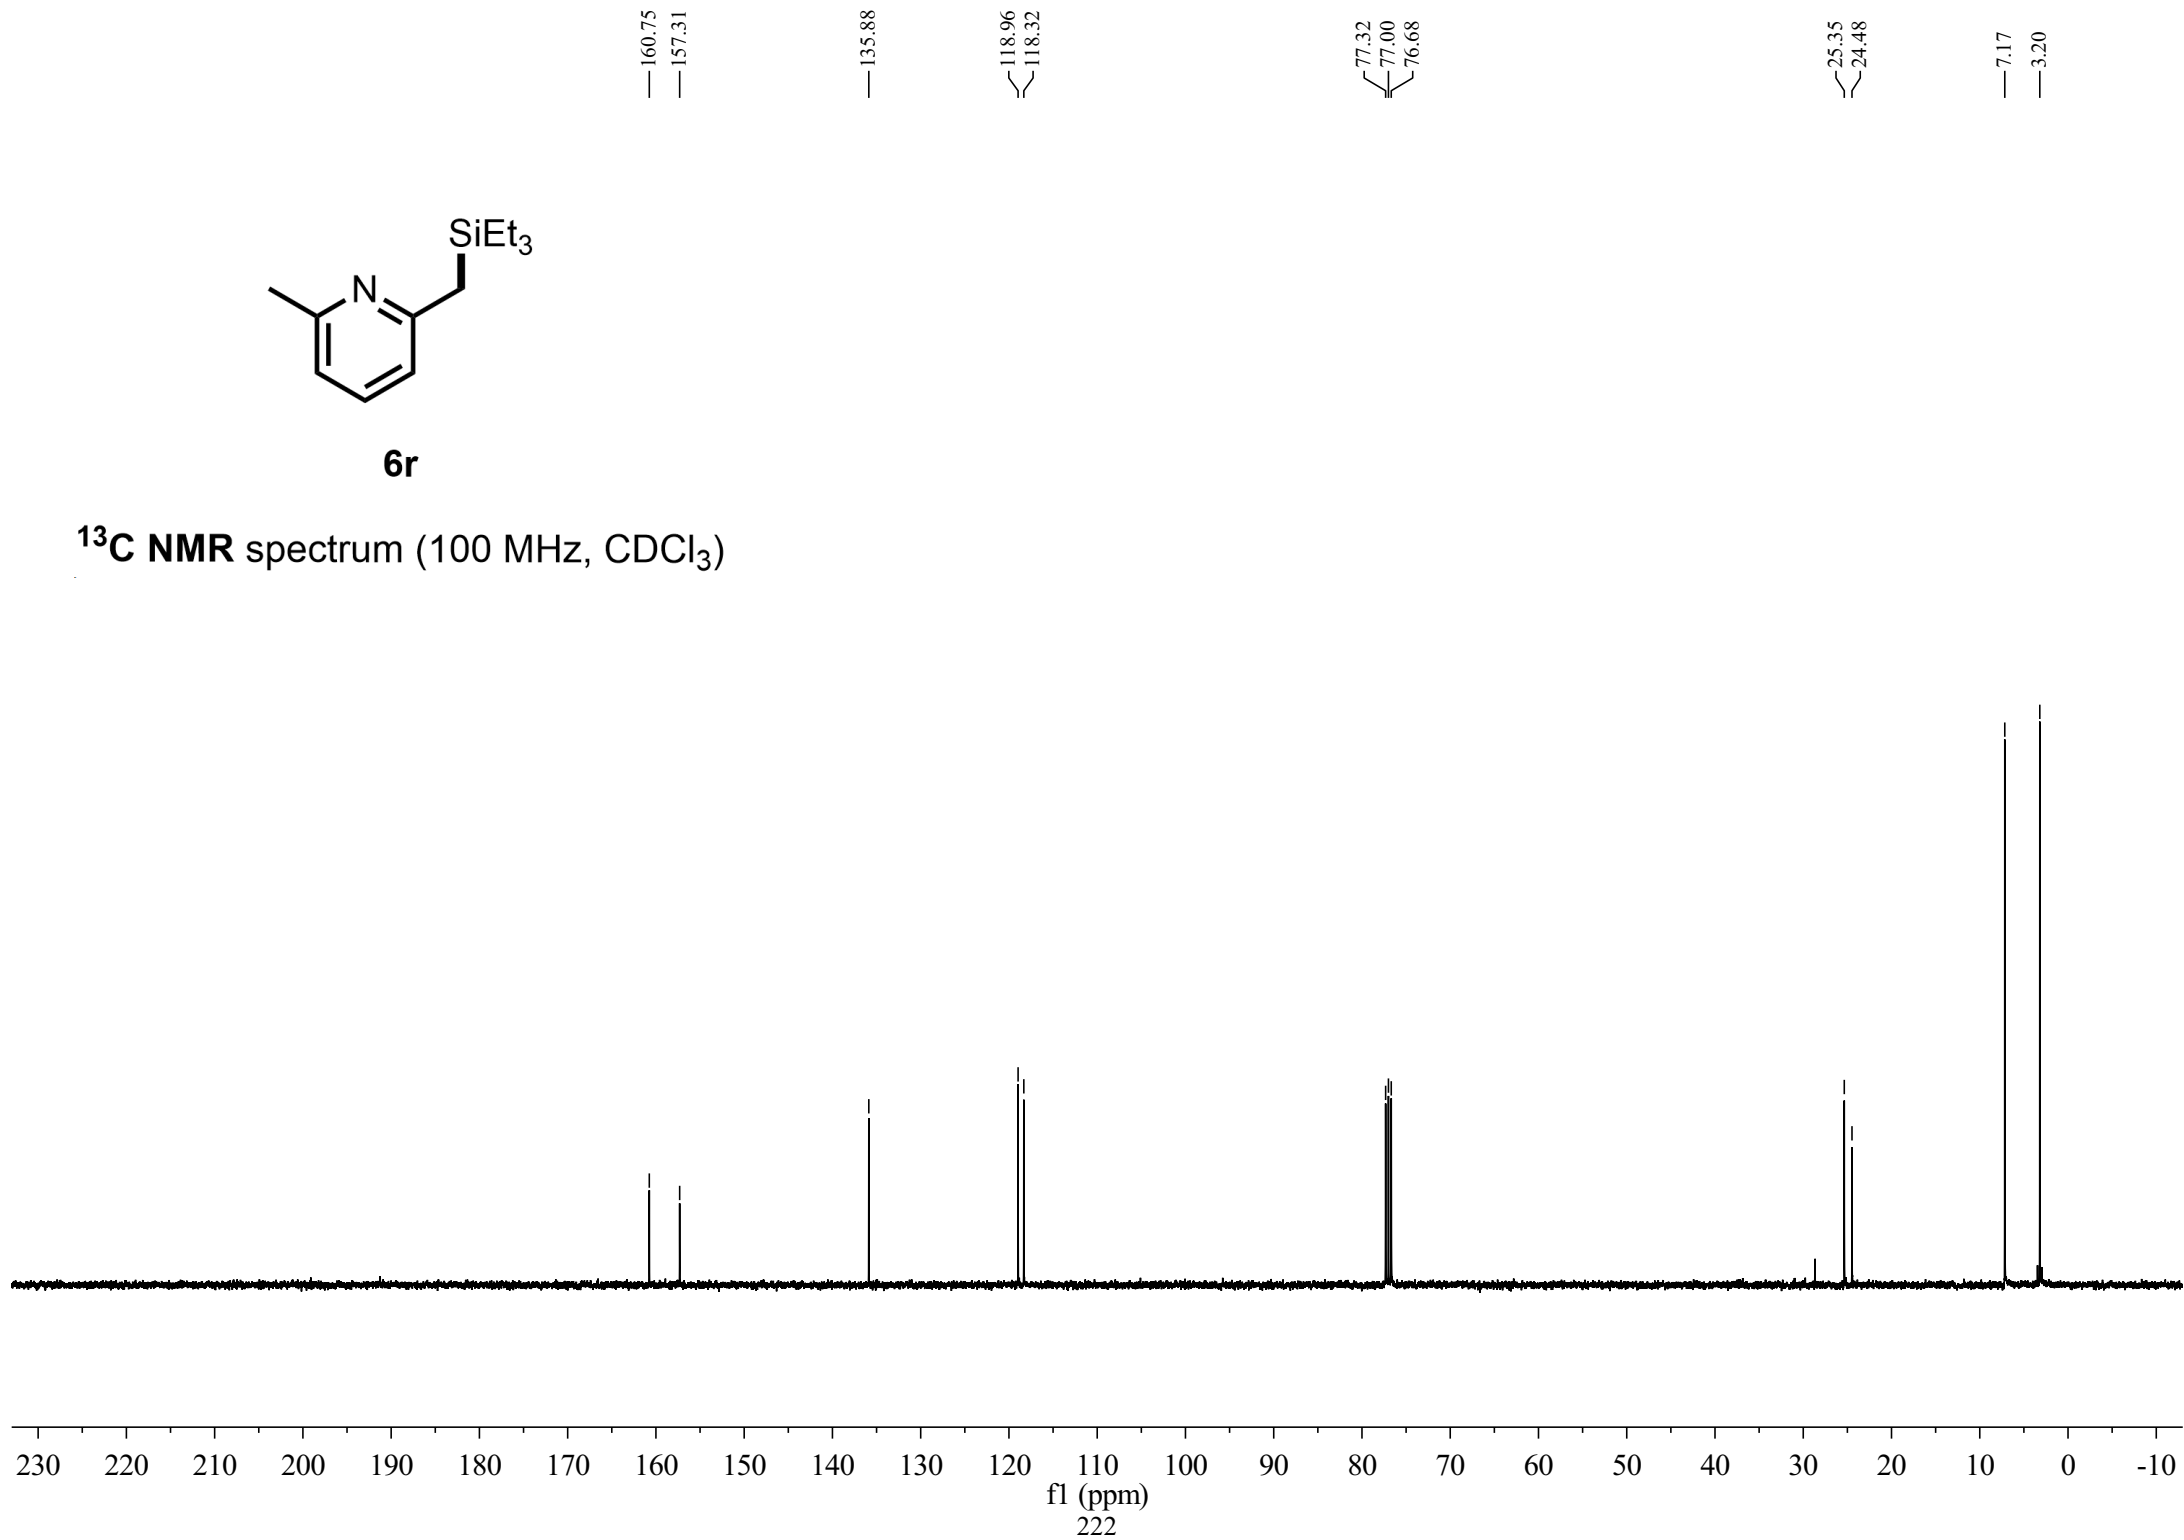

Supplement: d1sc02344f1.pdf [file d1sc02344f1.pdf]
